# Supplementary material for: Computational searches for crystal structures of dioxides of group 14 elements (CO2, SiO2, GeO2) under ultrahigh pressure
Source: Royal Society of Chemistry journal article supplement (doi:10.1039/d0ra03359f), 2020-01-01
Supplement: d0ra03359f1.pdf [file d0ra03359f1.pdf]

## Supplementary Information

# Computational exploration for crystal structures of dioxides of group 14 elements (CO<sub>2</sub>, SiO<sub>2</sub>, GeO<sub>2</sub>) under ultrahigh pressure

*Hitoshi Nabata,<sup>a</sup> Makito Takagi,<sup>b</sup> Kenichiro Saita,<sup>c,\*</sup> and Satoshi Maeda<sup>c,d,e,f,\*</sup>*

<sup>a</sup>*Graduate School of Chemical Sciences and Engineering, Hokkaido University, Sapporo 060-8628, Japan.*

<sup>b</sup>*Graduate School of Nanobioscience, Yokohama City University, Yokohama, Kanagawa 236-0027, Japan.*

<sup>c</sup>*Department of Chemistry, Faculty of Science, Hokkaido University, Sapporo 060-0810, Japan.*

<sup>d</sup>*Institute for Chemical Reaction Design and Discovery (WPI-ICReDD), Hokkaido University, Sapporo 001-0021, Japan.*

<sup>e</sup>*JST, ERATO Maeda Artificial Intelligence for Chemical Reaction Design and Discovery Project, Sapporo 060-0810, Japan*

<sup>f</sup>*Research and Services Division of Materials Data and Integrated System (MaDIS), National Institute for Materials Science (NIMS), Tsukuba 305-0044, Japan.*

\*Authors to whom correspondence should be addressed. E-mail: [ksaita@sci.hokudai.ac.jp](mailto:ksaita@sci.hokudai.ac.jp)  
(KS); [smaeda@eis.hokudai.ac.jp](mailto:smaeda@eis.hokudai.ac.jp) (SM).

The list of xyz coordinates of obtained EQs is shown below; (i) CO<sub>2</sub> at 1 atm, (ii) SiO<sub>2</sub> at 1 atm, (iii) GeO<sub>2</sub> at 1 atm, (iv) CO<sub>2</sub> at 10<sup>6</sup> atm, (v) SiO<sub>2</sub> at 10<sup>6</sup> atm, (vi) GeO<sub>2</sub> at 10<sup>6</sup> atm.

### (i) CO<sub>2</sub> at 1 atm

# EQ-CO<sub>2</sub> 0

|    |                 |                 |                 |
|----|-----------------|-----------------|-----------------|
| C  | 0.417129037206  | -0.810003017473 | -0.164281152129 |
| C  | -1.490017043564 | 0.697782013820  | 3.055760417850  |
| C  | 4.031264342809  | -0.809831860987 | -0.164282556240 |
| C  | 2.123642871789  | 0.697383434786  | 3.055925721372  |
| C  | 7.644895502319  | -0.809391197206 | -0.164105841990 |
| C  | 5.737900794437  | 0.697741904732  | 3.055905445111  |
| O  | -1.410103270840 | -3.680187106721 | 2.406309119304  |
| O  | 2.203446363846  | -3.680565638504 | 2.406409151119  |
| O  | 1.025433711510  | -1.588901782304 | 0.485900968205  |
| O  | 4.639357292433  | -1.588859617273 | 0.485925676826  |
| O  | 3.422953799527  | -0.029440703244 | -0.813117318004 |
| O  | 1.480787710690  | 1.448361529131  | 3.706575325208  |
| O  | -0.191118357706 | -0.029531926860 | -0.813049001232 |
| O  | 5.817835155928  | -3.680154307714 | 2.406438476626  |
| O  | -2.132936770638 | 1.448536919499  | 3.706557359764  |
| O  | 8.253243507238  | -1.588363696740 | 0.485964018946  |
| O  | 7.036636654698  | -0.029133550315 | -0.813108642266 |
| O  | 5.094791807455  | 1.448499008001  | 3.706495881300  |
| TV | 10.841668210016 | -0.000000000009 | 0.000000000003  |
| TV | 0.560848455525  | 3.624695304814  | -0.000000000013 |
| TV | -4.848305181512 | -4.118969158692 | 6.437527165060  |

# EQ-CO<sub>2</sub> 1

|    |                 |                 |                 |
|----|-----------------|-----------------|-----------------|
| C  | 0.247488082864  | -0.948347170134 | -0.243591861038 |
| C  | -1.439628232777 | 0.765376652866  | 2.986613637874  |
| C  | 3.838086432286  | -0.948315405147 | -0.243505789777 |
| C  | 2.151094853629  | 0.765464207830  | 2.986630500908  |
| C  | 7.428757474946  | -0.948366980582 | -0.243468856864 |
| C  | 5.741676253421  | 0.765344683933  | 2.986588156450  |
| O  | -1.131545284015 | -3.506851923493 | 2.256968833237  |
| O  | 2.459091529762  | -3.506808262874 | 2.256952789302  |
| O  | 0.836387279970  | -1.674679004243 | 0.480904288210  |
| O  | 4.426997025175  | -1.674684986540 | 0.480948216407  |
| O  | 3.247232028352  | -0.222148459143 | -0.966803850942 |
| O  | 1.520232822573  | 1.448345229011  | 3.717074237023  |
| O  | -0.343434497555 | -0.222198917856 | -0.966854153544 |
| O  | 6.049807107747  | -3.506829428257 | 2.256930088833  |
| O  | -2.070520127897 | 1.448263044219  | 3.717024406670  |
| O  | 8.017615761469  | -1.674787638292 | 0.480973718067  |
| O  | 6.837914287261  | -0.222213462312 | -0.966791428556 |
| O  | 5.110793957656  | 1.448227221979  | 3.717008451139  |
| TV | 10.771993034819 | 0.000000000006  | 0.000000000003  |
| TV | 0.324981928280  | 3.590098447922  | -0.000000000004 |
| TV | -4.143413936675 | -3.780460731523 | 6.456599528408  |

# EQ-CO<sub>2</sub> 2

|   |                |                 |                 |
|---|----------------|-----------------|-----------------|
| C | 0.631347010067 | -0.499894669158 | -0.523964542534 |
|---|----------------|-----------------|-----------------|

|    |                 |                 |                 |
|----|-----------------|-----------------|-----------------|
| C  | -0.972959908772 | 1.265999565578  | 2.726086459497  |
| C  | 1.030238092321  | 3.044806945634  | -0.481264983836 |
| C  | -0.580339807702 | 4.818229683318  | 2.698927828738  |
| C  | 1.418986205098  | 6.614054206530  | -0.529911656674 |
| C  | -0.203297408834 | 8.313532997857  | 2.684597190529  |
| O  | -2.043306635515 | -1.624187208785 | 3.388474038930  |
| O  | -1.634640157895 | 1.995859171408  | 3.381145886640  |
| O  | 1.306711915239  | -1.167478989460 | 0.180455855798  |
| O  | 1.693778785281  | 2.320701420620  | 0.178366673384  |
| O  | 0.365662636148  | 3.768081196208  | -1.139767913778 |
| O  | 0.091159010390  | 4.147342736380  | 1.993950459548  |
| O  | -0.044041405097 | 0.168331413327  | -1.227723685379 |
| O  | -1.252390279673 | 5.488566696914  | 3.404071894053  |
| O  | -0.310308761259 | 0.536035567132  | 2.072894423202  |
| O  | 2.095175579772  | 5.946460617645  | 0.173165834561  |
| O  | 0.743721763556  | 7.284231469157  | -1.232292242965 |
| O  | 0.467308136160  | 7.639403331002  | 1.981492224198  |
| TV | 3.599681648090  | 0.000000000000  | 0.000000000001  |
| TV | 1.168056193011  | 10.608761975189 | -0.000000000012 |
| TV | 0.043966407891  | 0.025475955534  | 6.430790554706  |

# EQ-CO<sub>2</sub> 3

|    |                 |                 |                 |
|----|-----------------|-----------------|-----------------|
| C  | 0.578429938757  | -0.533427862249 | -0.461420156093 |
| C  | -1.180520776676 | 1.309355181948  | 2.653152213028  |
| C  | 0.656946842264  | 3.135626972067  | -0.461419549436 |
| C  | -1.102002543080 | 4.978421901701  | 2.653154836328  |
| C  | 0.735462179826  | 6.804678641383  | -0.461412105799 |
| C  | -1.023485255839 | 8.647461721395  | 2.653150960082  |
| O  | -1.921261696842 | -1.687616423081 | 3.365434852239  |
| O  | -1.842756021379 | 1.981433824406  | 3.365444739913  |
| O  | 1.239929542467  | -1.202392868806 | 0.254395797816  |
| O  | 1.318447895608  | 2.466674710895  | 0.254403994562  |
| O  | -0.004470731820 | 3.805489404075  | -1.176471888605 |
| O  | -0.438721103768 | 4.306987248593  | 1.941149984917  |
| O  | -0.082986504628 | 0.136437256742  | -1.176469709662 |
| O  | -1.764231179227 | 5.650529688455  | 3.365424037553  |
| O  | -0.517232650560 | 0.637948398100  | 1.941129560662  |
| O  | 1.396970017200  | 6.135715813455  | 0.254397359637  |
| O  | 0.074043295822  | 7.474531565017  | -1.176471065977 |
| O  | -0.360203773761 | 7.976045740918  | 1.941129882770  |
| TV | 3.582862885270  | -0.000000000000 | 0.000000000001  |
| TV | 0.235546673324  | 11.007171735443 | -0.000000000012 |
| TV | -0.013829630029 | 0.016852044845  | 6.234303190525  |

# EQ-CO<sub>2</sub> 4

|   |                 |                 |                 |
|---|-----------------|-----------------|-----------------|
| C | 2.593615350026  | -1.265867397634 | -0.652569184977 |
| C | -2.405270119459 | 0.464961596271  | 2.654567104409  |
| C | 6.049662800398  | -1.264408672198 | -0.721122756291 |
| C | 1.026761111665  | 0.474823221382  | 2.652201219602  |
| C | 9.492282459681  | -1.266259928985 | -0.723159247178 |
| C | 4.487745637657  | 0.471542658332  | 2.647099989156  |
| O | -1.817052494477 | -0.299574173084 | 3.339024033641  |
| O | 1.614956929350  | -0.291274416054 | 3.334157966437  |
| O | 3.208963931495  | -2.013921218497 | -1.331315082767 |
| O | 6.606750471222  | -1.997044781465 | -1.464683447178 |
| O | 5.491483438706  | -0.528895511149 | 0.018187470819  |
| O | 0.441054556753  | 1.242235145201  | 1.969234887949  |

|    |                 |                 |                 |
|----|-----------------|-----------------|-----------------|
| O  | 1.979845280676  | -0.515441824787 | 0.024896541960  |
| O  | 5.077514235566  | -0.293930637963 | 3.328102015089  |
| O  | -2.992425685726 | 1.230184510654  | 1.970422181389  |
| O  | 10.055613753925 | -1.998247212007 | -1.462451674458 |
| O  | 8.927287584953  | -0.530993475246 | 0.011897610003  |
| O  | 3.898789319364  | 1.238289659211  | 1.966299736430  |
| TV | 10.360969989581 | -0.000000000018 | -0.000000000006 |
| TV | 0.417759055335  | 3.591738189734  | -0.000000000056 |
| TV | -3.567602735474 | -0.127510470587 | 6.625984534151  |

# EQ-CO<sub>2</sub> 5

|    |                 |                 |                 |
|----|-----------------|-----------------|-----------------|
| C  | 0.907949325869  | -1.163885567189 | -0.603368474690 |
| C  | -0.870530090511 | 0.538644423155  | 2.559769022776  |
| C  | 1.266210954392  | 2.256655037794  | -0.639728260995 |
| C  | -0.453642713798 | 3.994948245312  | 2.553823581625  |
| C  | 1.553811345317  | 5.792603965939  | -0.637535124333 |
| C  | -0.284857759597 | 7.480804229470  | 2.617341694020  |
| O  | -0.183933815575 | -0.156991445104 | 3.224004533703  |
| O  | 0.231726836412  | 3.302571413715  | 3.223561856624  |
| O  | 1.587045181136  | -1.774445369586 | -1.353795965544 |
| O  | 1.959456454272  | 1.556546026692  | -1.294442428958 |
| O  | 0.576318897267  | 2.956772306934  | 0.016784251523  |
| O  | -1.138057399792 | 4.688749486811  | 1.884429090615  |
| O  | 0.229561669704  | -0.550947577774 | 0.146949636738  |
| O  | 0.412646184884  | 6.860817536206  | 3.343989771414  |
| O  | -1.560384029679 | 1.234415524836  | 1.897834603261  |
| O  | 2.253751530930  | 5.111452212582  | -1.304599927497 |
| O  | 0.855779173846  | 6.474043355315  | 0.030902695264  |
| O  | -0.986299415819 | 8.100697931561  | 1.894868807421  |
| TV | 3.669920125836  | -0.000000000006 | -0.000000000002 |
| TV | 0.831502829784  | 10.446111255028 | -0.000000000181 |
| TV | -3.739381576863 | -0.041641268091 | 6.405194035257  |

# EQ-CO<sub>2</sub> 6

|    |                 |                 |                 |
|----|-----------------|-----------------|-----------------|
| C  | 0.610184793893  | -0.735388124436 | -0.324420954604 |
| C  | -1.236811372164 | 1.025427759756  | 2.807976905850  |
| C  | 0.539879107055  | 2.785472141747  | -0.395308009241 |
| C  | -1.404549306396 | 4.561996316844  | 2.803047163570  |
| C  | 0.353684135822  | 6.316242527057  | -0.264797860337 |
| C  | -1.617525937866 | 8.042792834150  | 2.904135333041  |
| O  | -0.386296836073 | -1.821591842538 | 2.188175890762  |
| O  | -0.561293843105 | 1.665799891494  | 2.078833938088  |
| O  | 1.306029002447  | -0.045326035145 | 0.336092342841  |
| O  | 1.245920046027  | 3.401421912395  | 0.326438327156  |
| O  | -0.165036458015 | 2.169415069385  | -1.118117747646 |
| O  | -2.079555905859 | 3.918509461227  | 3.528481141688  |
| O  | -0.088213652287 | -1.424627808697 | -0.983857302141 |
| O  | -0.730205401551 | 5.207165454707  | 2.077593853321  |
| O  | -1.909661276677 | 0.381566964562  | 3.536825861781  |
| O  | 1.014728594328  | 6.983200905345  | 0.454281242207  |
| O  | -0.308491831484 | 5.646909789901  | -0.980079099418 |
| O  | -2.295658268752 | 7.390849569813  | 3.620813270220  |
| TV | 3.662161222643  | 0.000000000002  | 0.000000000001  |
| TV | -0.554637119466 | 10.518043253817 | -0.000000000015 |
| TV | -3.680458829541 | 0.008826885229  | 6.368152930751  |

# EQ-CO<sub>2</sub> 7

|    |                 |                 |                 |
|----|-----------------|-----------------|-----------------|
| C  | 0.569419655621  | -0.397531942736 | -0.412586478226 |
| C  | -1.272516639420 | 1.347752207087  | 2.740304020094  |
| C  | 0.656472449540  | 3.097883003244  | -0.423501803235 |
| C  | -1.121353031581 | 4.822850863037  | 2.684976616678  |
| C  | 0.789287673078  | 6.609286276105  | -0.537596169255 |
| C  | -0.986340710964 | 8.306265166273  | 2.724690510146  |
| O  | -2.102906072517 | -1.501929324600 | 3.443159647452  |
| O  | -1.954853789913 | 1.993482386205  | 3.458285743619  |
| O  | 1.239656876034  | -1.059286663815 | 0.302732231858  |
| O  | 1.364442819512  | 2.486545456687  | 0.300602991843  |
| O  | -0.053642608607 | 3.709766792405  | -1.144292783849 |
| O  | -0.423667652433 | 4.239605356008  | 1.929749505950  |
| O  | -0.099972472848 | 0.266134633960  | -1.125854489683 |
| O  | -1.816549188157 | 5.405860668295  | 3.442909765434  |
| O  | -0.591476961263 | 0.699446836192  | 2.023813868633  |
| O  | 1.462276939017  | 5.949868139253  | 0.175626770641  |
| O  | 0.117715978267  | 7.268319189221  | -1.253650384820 |
| O  | -0.305042478788 | 7.657242427423  | 2.008500890679  |
| TV | 3.686262466021  | 0.000000000002  | 0.000000000004  |
| TV | 0.435242186967  | 10.454856455211 | -0.000000000057 |
| TV | -3.735892822991 | -0.030274778137 | 6.336164976701  |

# EQ-CO<sub>2</sub> 8

|    |                 |                 |                 |
|----|-----------------|-----------------|-----------------|
| C  | 0.856498348324  | -1.235402343847 | -0.018196763616 |
| C  | -1.131296629064 | 0.534159421399  | 2.662103653620  |
| C  | 4.583567924915  | -1.257197567144 | 0.420314975398  |
| C  | 2.584131157722  | 0.592651580341  | 3.112025194476  |
| C  | 10.045240472339 | -1.243615578552 | -1.488266662558 |
| C  | 8.052942070791  | 0.606673207094  | 1.194515394941  |
| O  | -0.950798332896 | -0.173933154993 | 3.591560359725  |
| O  | 3.527444996484  | -0.111223550624 | 3.004110033503  |
| O  | 0.671893418355  | -1.935947511769 | -0.953614410139 |
| O  | 3.642955658261  | -1.966258737340 | 0.528713247980  |
| O  | 5.524350939644  | -0.549542913680 | 0.313418997803  |
| O  | 1.641775749505  | 1.299362105496  | 3.220181404041  |
| O  | 1.041198886538  | -0.535835608588 | 0.916557012823  |
| O  | 8.225329399764  | -0.085907447175 | 2.138181746238  |
| O  | -1.311249878895 | 1.243196152057  | 1.731957538934  |
| O  | 9.872028132346  | -1.938684252675 | -2.429129963977 |
| O  | 10.220544794974 | -0.548179800649 | -0.547019508267 |
| O  | 7.882503127925  | 1.301850384235  | 0.253111708926  |
| TV | 12.299584469224 | -0.000000000088 | -0.000000000018 |
| TV | 0.003684929517  | 3.681892347832  | -0.000000000155 |
| TV | -3.988643625045 | -0.002924271904 | 5.374833074734  |

# EQ-CO<sub>2</sub> 9

|   |                 |                 |                 |
|---|-----------------|-----------------|-----------------|
| C | 5.218779909611  | -1.261365810115 | 0.853870288697  |
| C | 0.337699603049  | -1.443304061937 | -1.117397733002 |
| C | -2.850133704221 | -1.805281565960 | 1.542503294187  |
| C | 6.988773435745  | 1.743673336785  | 0.853765050964  |
| C | 2.110653977274  | 1.561637375526  | -1.109377646266 |
| C | -1.080532569793 | 1.199517539198  | 1.542435983568  |
| O | -2.766715179071 | -2.553578080017 | 0.631073526224  |
| O | 4.121026892291  | -1.285248447504 | 0.408893038962  |
| O | 1.415601341130  | -1.372902528853 | -0.632526758541 |
| O | -0.737350920585 | -1.516977103579 | -1.604599093826 |
| O | 1.034860488312  | 1.485466700964  | -1.594145539090 |

|    |                 |                 |                 |
|----|-----------------|-----------------|-----------------|
| O  | 6.312993298790  | -1.236440952825 | 1.302768146313  |
| O  | -2.934784630793 | -1.056457572852 | 2.453620225837  |
| O  | 8.082785863490  | 1.768773826990  | 1.303089799732  |
| O  | -1.165547510307 | 1.948359917572  | 2.453528621511  |
| O  | -0.996787979851 | 0.451154695628  | 0.631097742890  |
| O  | 5.891253705594  | 1.719570529772  | 0.408337761558  |
| O  | 3.189379330622  | 1.634031751758  | -0.626945111110 |
| TV | 12.023307206903 | -0.000000000000 | 0.000000000008  |
| TV | 3.538348526920  | 6.009939095250  | -0.000000000017 |
| TV | 0.739624814854  | -0.859983190903 | 3.396553465995  |

# EQ-CO<sub>2</sub> 10

|    |                 |                 |                 |
|----|-----------------|-----------------|-----------------|
| C  | 0.685432162871  | -0.230203495918 | -0.380347909438 |
| C  | -1.864716095881 | -0.014245300201 | 2.664534469064  |
| C  | 2.790534102196  | 2.495108862929  | -0.280921478571 |
| C  | 0.201795685291  | 2.713220424370  | 2.731540627863  |
| C  | 5.004869715598  | 5.270593181899  | -0.320839908568 |
| C  | 2.422474551089  | 5.430323848768  | 2.724219426787  |
| O  | -2.802931388858 | 0.031913105695  | 3.382396953910  |
| O  | -0.779163655113 | 2.753617837372  | 3.391882352206  |
| O  | 1.634275151294  | -0.270399577512 | 0.325253309359  |
| O  | 3.751257167950  | 2.457920486358  | 0.408497568241  |
| O  | 1.827044932356  | 2.528955935917  | -0.967094852553 |
| O  | 1.182560293988  | 2.671383897620  | 2.071528413670  |
| O  | -0.263334376265 | -0.193085999012 | -1.085731933606 |
| O  | 1.439644638326  | 5.472927213141  | 3.381807500045  |
| O  | -0.923551735554 | -0.060010067087 | 1.949723524538  |
| O  | 5.987759863583  | 5.301264161427  | 0.336212538131  |
| O  | 4.021863785446  | 5.238406289813  | -0.977370481124 |
| O  | 3.404988091275  | 5.387869681186  | 2.067131055478  |
| TV | 5.181484587782  | 0.000000000001  | 0.000000000005  |
| TV | 6.649788925131  | 8.159816064390  | -0.000000000050 |
| TV | -5.174836468774 | 0.310792471688  | 6.085281539118  |

# EQ-CO<sub>2</sub> 11

|    |                 |                 |                 |
|----|-----------------|-----------------|-----------------|
| C  | 0.522959153608  | -0.433048832173 | -0.551558622316 |
| C  | -1.307250163078 | 1.255824824136  | 2.677663916427  |
| C  | 0.560642380392  | 2.977119065911  | -0.484659840104 |
| C  | -1.333565224554 | 4.699245040028  | 2.744439199281  |
| C  | 0.531461703698  | 6.426701224296  | -0.553251674153 |
| C  | -1.294126655504 | 8.116159158539  | 2.679545038370  |
| O  | -2.022570611757 | -1.561852285363 | 3.405022852473  |
| O  | -2.016582419842 | 1.847388915907  | 3.415349742584  |
| O  | 1.210532485281  | -1.057301386504 | 0.180354055757  |
| O  | 1.262447006816  | 2.442735365242  | 0.303615505529  |
| O  | -0.141816514003 | 3.509089089427  | -1.273409783485 |
| O  | -0.617256991049 | 4.168182850031  | 1.967625657214  |
| O  | -0.165253722023 | 0.188765618810  | -1.285467352476 |
| O  | -2.047812370770 | 5.231118071577  | 3.523128227628  |
| O  | -0.596095422347 | 0.665877529353  | 1.939129263777  |
| O  | 1.225850569406  | 5.821654685849  | 0.187678427217  |
| O  | -0.160258431998 | 7.033794603475  | -1.295721792253 |
| O  | -0.593587003865 | 7.497446469804  | 1.953886821682  |
| TV | 3.699392833506  | 0.000000000004  | 0.000000000010  |
| TV | 0.030957597119  | 10.299110668798 | -0.000000000060 |
| TV | -3.788824270840 | -0.058889846770 | 6.451083811047  |

# EQ-CO<sub>2</sub> 12

|    |                 |                 |                 |
|----|-----------------|-----------------|-----------------|
| C  | 0.654355606984  | 0.136132630178  | -0.390137321796 |
| C  | -1.134748007520 | 1.898755286975  | 2.746644422766  |
| C  | 4.723059769413  | 0.075636256197  | -0.392028294826 |
| C  | 2.731121961319  | 1.829817811431  | 2.661653678106  |
| C  | 8.620420366905  | 0.078864293740  | -0.390661917228 |
| C  | 6.680470170105  | 1.833596160235  | 2.718654569237  |
| O  | -2.096050177056 | -4.439179125715 | 3.437578504303  |
| O  | 1.810271949610  | -4.555001014276 | 3.430103478586  |
| O  | 1.352756002344  | -0.514894758367 | 0.307385207895  |
| O  | 5.443355704104  | -0.536163059028 | 0.318692878110  |
| O  | 4.003991466695  | 0.688180990536  | -1.102334678315 |
| O  | 3.381827299283  | 1.216771233817  | 1.887824946704  |
| O  | -0.045965387511 | 0.787485039132  | -1.087215150246 |
| O  | 5.699389398678  | -4.544693138021 | 3.425324274145  |
| O  | -0.439190422471 | 1.240932425286  | 2.052006423526  |
| O  | 9.337383851579  | -0.536350443529 | 0.320533420998  |
| O  | 7.905836998236  | 0.695036551819  | -1.102719496829 |
| O  | 7.394626446647  | 1.210982171021  | 2.012114380546  |
| TV | 11.702486348845 | 0.000000000012  | 0.000000000033  |
| TV | 0.132335707222  | 3.499439608244  | -0.000000000012 |
| TV | -3.863322478211 | 0.017546817961  | 6.238345567478  |

# EQ-CO<sub>2</sub> 13

|    |                 |                 |                 |
|----|-----------------|-----------------|-----------------|
| C  | -0.728404027236 | -2.055121941155 | -0.220486438386 |
| C  | 1.142501098788  | 3.144059070128  | 2.798173479759  |
| C  | -0.764658688065 | -0.603737927569 | 2.839313256281  |
| C  | 0.915993296351  | 4.622234501860  | 5.917465846086  |
| C  | -0.904139523337 | 0.969979779531  | 5.835128465819  |
| C  | 0.814936703033  | 6.288374430796  | 8.922593618783  |
| O  | -1.891131194083 | -5.183260853733 | 2.598104360774  |
| O  | -2.122363975742 | -3.725410318841 | 5.825493674684  |
| O  | -1.433011607802 | -2.467327119679 | 0.635838192660  |
| O  | -1.441299988265 | -1.094974760143 | 3.676714469477  |
| O  | -0.084856109925 | -0.115555418394 | 2.002221025198  |
| O  | 0.226315957012  | 5.579176540702  | 6.012039501645  |
| O  | -0.019614599414 | -1.643538905717 | -1.072953124075 |
| O  | -2.257194203390 | -2.079518866851 | 8.804716178367  |
| O  | 0.452791189834  | 4.083209002195  | 2.998170228911  |
| O  | -1.614517772111 | 0.564301597055  | 6.689779897272  |
| O  | -0.194002721700 | 1.376461071459  | 4.979130380115  |
| O  | 0.162190533614  | 7.268052243214  | 9.037284502302  |
| TV | 3.668531769444  | 0.000000000001  | 0.000000000001  |
| TV | 3.726897051260  | 7.389973872764  | -0.000000000007 |
| TV | -0.304392145447 | 4.591035109082  | 9.193590401753  |

# EQ-CO<sub>2</sub> 14

|   |                 |                 |                 |
|---|-----------------|-----------------|-----------------|
| C | 7.128511331070  | -1.962606465256 | 1.767074221633  |
| C | -0.137021926983 | -1.235275433346 | -1.903833276436 |
| C | -2.498963663489 | -2.205868691662 | 1.407653144042  |
| C | 8.868119668977  | -3.134785075456 | 4.709127487010  |
| C | 1.584034144478  | -2.423575433841 | 1.035921677251  |
| C | -0.757823444717 | -3.375486913353 | 4.349921950711  |
| O | -2.638319228544 | -2.865905108983 | 0.436661178164  |
| O | 5.959425754524  | -2.074742169217 | 1.615360130943  |
| O | -1.302028716291 | -1.375234933812 | -2.054281149971 |
| O | 1.030268120125  | -1.095832403779 | -1.756234823532 |



|    |                 |                 |                 |
|----|-----------------|-----------------|-----------------|
| O  | 2.751485286678  | -2.289897970709 | 1.185922370562  |
| O  | 8.295509475005  | -1.849121534917 | 1.920295980507  |
| O  | -2.360039572611 | -1.545776007311 | 2.378685803806  |
| O  | 10.035051287014 | -3.020367924894 | 4.862357714637  |
| O  | -0.619433909841 | -2.715296360351 | 5.320971285555  |
| O  | -0.896836324439 | -4.035526534075 | 3.378839445619  |
| O  | 7.699064547423  | -3.247524275069 | 4.557535356904  |
| O  | 0.418917409502  | -2.558064252709 | 0.881754469885  |
| TV | 13.704540446846 | -0.000000000009 | 0.000000000006  |
| TV | 1.652015542433  | 3.153744123148  | -0.000000000006 |
| TV | 3.480988123770  | -2.338867011406 | 5.885119964382  |

# EQ-CO<sub>2</sub> 15

|    |                 |                 |                 |
|----|-----------------|-----------------|-----------------|
| C  | 5.637281917836  | -1.308957924618 | 0.775003540217  |
| C  | 0.607584502789  | -1.632162860877 | -1.027377189037 |
| C  | -2.741958864830 | -1.892823721889 | 1.580060087541  |
| C  | 6.260760227160  | -2.074747557694 | 4.120182019672  |
| C  | 1.183812015694  | -2.436836071914 | 2.272336795833  |
| C  | -2.162939066422 | -2.700710213516 | 4.880145504132  |
| O  | -2.701951952790 | -2.736001236694 | 0.751640238894  |
| O  | 4.536848535111  | -1.414334731930 | 0.350181129312  |
| O  | -0.488824506639 | -1.742526212208 | -1.456350501822 |
| O  | 1.706730059922  | -1.525508415006 | -0.600362798490 |
| O  | 2.283403713569  | -2.330024739559 | 2.698123099311  |
| O  | 6.735985819996  | -1.202780628158 | 1.198758795621  |
| O  | -2.781890255209 | -1.050845831819 | 2.409891428896  |
| O  | 7.340161655144  | -2.013786863433 | 4.599292087100  |
| O  | -2.199462756601 | -1.859229441758 | 5.710152724570  |
| O  | -2.126871489354 | -3.542751124080 | 4.050335826863  |
| O  | 5.178338627379  | -2.133863747109 | 3.644396072170  |
| O  | 0.086696893952  | -2.547106123304 | 1.844696975760  |
| TV | 12.313856411835 | -0.000000000002 | 0.000000000011  |
| TV | 1.991069474094  | 3.024081021949  | -0.000000000005 |
| TV | 1.150344542881  | -1.609772702779 | 6.602098060547  |

# EQ-CO<sub>2</sub> 16

|    |                 |                 |                 |
|----|-----------------|-----------------|-----------------|
| C  | 5.314748559854  | -1.576453859042 | 0.875614686808  |
| C  | 0.378452270846  | -1.960853928172 | -0.950667037820 |
| C  | -3.062157356876 | -2.183069006577 | 1.562129244723  |
| C  | 5.746557596004  | -2.355667254104 | 4.140025374307  |
| C  | 0.810353561662  | -2.740055082395 | 2.313718267958  |
| C  | -2.630358727298 | -2.962372479715 | 4.826373706167  |
| O  | -3.026543887532 | -3.040099719932 | 0.747721281748  |
| O  | 4.206622553475  | -1.636213064565 | 0.461446706338  |
| O  | -0.700546395270 | -2.068696895806 | -1.422486945305 |
| O  | 1.460816178832  | -1.856005149608 | -0.481937226235 |
| O  | 1.892684666401  | -2.635238734050 | 2.782527537794  |
| O  | 6.419837649530  | -1.514839623396 | 1.292915083554  |
| O  | -3.097181929267 | -1.326923113840 | 2.377678010413  |
| O  | 6.851659181130  | -2.294088619525 | 4.557307709189  |
| O  | -2.665379756611 | -2.106253133241 | 5.641949475644  |
| O  | -2.594715298313 | -3.819419965874 | 4.011989560242  |
| O  | 4.638440203313  | -2.415427934076 | 3.725840430626  |
| O  | -0.268612510886 | -2.847966949111 | 1.841835490846  |
| TV | 12.278330002988 | -0.000000000002 | 0.000000000011  |
| TV | 2.083515965196  | 3.027530698225  | -0.000000000005 |
| TV | 0.863779777816  | -1.558513352301 | 6.528755807654  |

# EQ-CO<sub>2</sub> 17

|    |                 |                 |                 |
|----|-----------------|-----------------|-----------------|
| C  | 0.715225480956  | 0.057260269569  | -0.426190888610 |
| C  | -0.697672766128 | 1.806920308162  | 2.824282002533  |
| C  | 1.316560006643  | 3.410004922242  | -0.432046223306 |
| C  | -0.080050241492 | 5.227738116764  | 2.834682078221  |
| C  | 1.990226169327  | 6.812612948807  | -0.365230829573 |
| C  | 0.564490132903  | 8.585561141697  | 2.888956582401  |
| O  | -2.598388942754 | -4.261517486409 | 3.512544088791  |
| O  | -1.913435135093 | -0.932703312666 | 3.630914866634  |
| O  | 1.389644293811  | -0.576275185761 | 0.310442684291  |
| O  | 1.985728590037  | 2.769926561821  | 0.304228918493  |
| O  | 0.642890996691  | 4.049920586465  | -1.164056566976 |
| O  | 0.599408929230  | 4.543853228869  | 2.150702810582  |
| O  | 0.038541213594  | 0.694710225346  | -1.158960673914 |
| O  | -1.363561897981 | 2.526727159895  | 3.485465097099  |
| O  | -0.034888960457 | 1.088388234565  | 2.157863857225  |
| O  | 2.640417810073  | 6.086757674951  | 0.304186156052  |
| O  | 1.334092788872  | 7.538486501176  | -1.028751622783 |
| O  | 1.205766471805  | 7.923710407387  | 2.147724485941  |
| TV | 3.671426423108  | 0.000000000004  | 0.000000000011  |
| TV | 1.835564612481  | 10.177733457870 | -0.000000000033 |
| TV | -3.484133714098 | 0.152888521483  | 6.605656239566  |

# EQ-CO<sub>2</sub> 18

|    |                 |                 |                 |
|----|-----------------|-----------------|-----------------|
| C  | 6.058789029906  | -1.381584291993 | 0.835062151583  |
| C  | 1.032888661688  | -1.758909359898 | -0.983425035740 |
| C  | -2.183452865719 | -1.903309233439 | 1.585786380339  |
| C  | 6.795727714158  | -2.040234948209 | 4.144911263266  |
| C  | 1.822698666372  | -2.313935693139 | 2.342680764207  |
| C  | -1.451708473615 | -2.557302240882 | 4.900768380903  |
| O  | -2.062635002281 | -2.742038972873 | 0.760954114947  |
| O  | 4.935324799495  | -1.454895481577 | 0.468558934937  |
| O  | -0.086693254940 | -1.834672730268 | -1.357060637878 |
| O  | 2.153459747153  | -1.687231768266 | -0.608438900243 |
| O  | 2.946741388744  | -2.235237106913 | 2.707404508975  |
| O  | 7.180913083643  | -1.306768722367 | 1.201071596089  |
| O  | -2.304515148472 | -1.064706786454 | 2.410536309510  |
| O  | 7.917328337120  | -1.964668835059 | 4.511755125537  |
| O  | -1.570663991549 | -1.718783767128 | 5.725690819717  |
| O  | -1.332736707845 | -3.395872051283 | 4.075785031858  |
| O  | 5.672504597303  | -2.114363313634 | 3.777789032252  |
| O  | 0.700443623972  | -2.389907042163 | 1.978051976602  |
| TV | 12.191357030201 | -0.000000000002 | 0.000000000014  |
| TV | 1.941415819955  | 3.039555236631  | -0.000000000004 |
| TV | 1.469461233743  | -1.314405695972 | 6.622672482382  |

# EQ-CO<sub>2</sub> 19

|   |                 |                 |                 |
|---|-----------------|-----------------|-----------------|
| C | 5.763674454575  | -1.151226471422 | 0.757627787839  |
| C | 0.733581222275  | -1.445287493657 | -1.015645304597 |
| C | -2.596195621306 | -1.640053477584 | 1.549627151768  |
| C | 6.425602543847  | -1.810580339198 | 4.058389388865  |
| C | 1.398976048056  | -2.225772341276 | 2.233968034035  |
| C | -1.938794162750 | -2.412228443179 | 4.798247755226  |
| O | -2.461434416352 | -2.478716833607 | 0.727253572722  |
| O | 4.661565819184  | -1.266135838780 | 0.341121628965  |
| O | -0.368511574034 | -1.531966456327 | -1.434552086594 |

|    |                 |                 |                 |
|----|-----------------|-----------------|-----------------|
| O  | 1.838029559572  | -1.361851849656 | -0.597994519154 |
| O  | 2.505010272665  | -2.112362052398 | 2.640702671063  |
| O  | 6.864420754970  | -1.035375112862 | 1.174162197020  |
| O  | -2.732885600008 | -0.801850134583 | 2.372104744649  |
| O  | 7.550108588099  | -1.735544969938 | 4.416792577907  |
| O  | -2.051775995777 | -1.549935509282 | 5.599531350598  |
| O  | -1.832052600136 | -3.276648207483 | 3.997921885855  |
| O  | 5.298294148902  | -1.884223284620 | 3.703278489819  |
| O  | 0.294315321579  | -2.343978115822 | 1.827760789288  |
| TV | 12.307952611088 | -0.000000000004 | 0.000000000009  |
| TV | 1.935517987617  | 3.044642966535  | -0.000000000005 |
| TV | 1.380781525669  | -1.436443385054 | 6.522573967780  |

# EQ-CO<sub>2</sub> 20

|    |                 |                 |                 |
|----|-----------------|-----------------|-----------------|
| C  | 5.310968332820  | -1.648563927796 | 0.393354239030  |
| C  | 0.319969553282  | -1.106096515446 | -0.445487954737 |
| C  | -2.641514892563 | -2.207621101697 | 1.170500597304  |
| C  | 7.438796899393  | 2.215472190187  | 0.352935514381  |
| C  | 2.448741885984  | 2.750649884677  | -0.463573545693 |
| C  | -0.568106375944 | 1.691174846734  | 1.217275929071  |
| O  | -3.536541064770 | -2.749790513996 | 0.617386599804  |
| O  | 4.439661444885  | -2.202004382937 | -0.185590335658 |
| O  | -0.544629519902 | -1.653221777292 | -1.040170075499 |
| O  | 1.184174183641  | -0.558046643593 | 0.149883242817  |
| O  | 3.349806635740  | 3.291484327393  | 0.081279383422  |
| O  | 6.181560179389  | -1.094277228519 | 0.973309737455  |
| O  | -1.745453379594 | -1.667516433281 | 1.723190588603  |
| O  | 8.277033628160  | 2.777650880236  | 0.971335130186  |
| O  | 0.302021915751  | 2.244310076982  | 1.798524484020  |
| O  | -1.438753958663 | 1.137889402405  | 0.636908834793  |
| O  | 6.601797982660  | 1.651114259248  | -0.265356715688 |
| O  | 1.548675266796  | 2.208948912269  | -1.008432972769 |
| TV | 12.967789853058 | -0.000000000003 | 0.000000000017  |
| TV | 4.203139107025  | 7.746851321796  | -0.000000000014 |
| TV | 1.998818383732  | -1.605166967211 | 2.465434633605  |

# EQ-CO<sub>2</sub> 21

|    |                 |                 |                 |
|----|-----------------|-----------------|-----------------|
| C  | -0.116735645691 | 2.163263936300  | 4.365795725630  |
| C  | -2.046243096806 | 0.410595903792  | 1.149493638036  |
| C  | -1.400550012410 | 2.215325441913  | -2.143029261866 |
| C  | 0.079868229416  | 5.636637770371  | 4.366996027706  |
| C  | -1.851075601258 | 3.873076818932  | 1.203008706493  |
| C  | -1.192337001447 | 5.676002040705  | -2.142322793811 |
| O  | -1.362889308942 | -0.272336390220 | 1.830391616672  |
| O  | -2.278691308920 | -1.792473870321 | -2.951844026599 |
| O  | -0.731151420054 | 2.758196252142  | -1.331730117233 |
| O  | -0.404757481270 | 0.025186706492  | -4.750005990821 |
| O  | -0.211243707324 | 3.494868967113  | -4.748494759113 |
| O  | -2.525573318467 | 4.507091084856  | 0.465865417633  |
| O  | 0.549023597758  | 1.518000325170  | 3.631835008246  |
| O  | -2.313490499763 | 8.019551916580  | 0.466008180809  |
| O  | 0.749701784906  | 4.995095165813  | 3.634042017334  |
| O  | -1.177770657496 | 3.240832081971  | 1.940865143995  |
| O  | -2.070733597334 | 1.671066466527  | -2.952556435907 |
| O  | -0.522040287098 | 6.218332119051  | -1.331179226786 |
| TV | 3.586562005891  | -0.000000000011 | 0.000000000001  |
| TV | 0.415342895866  | 6.925723382642  | 0.000000000006  |

|                         |                 |                 |                 |
|-------------------------|-----------------|-----------------|-----------------|
| TV                      | -0.379965531117 | 2.783665678923  | 9.849261551701  |
| # EQ-CO <sub>2</sub> 22 |                 |                 |                 |
| C                       | -0.265139606508 | 2.141836754332  | 4.335395516258  |
| C                       | -2.082439190303 | 0.398295459482  | 1.082222085841  |
| C                       | -1.313376856313 | 2.202344078120  | -2.118380417165 |
| C                       | 3.193198218415  | 2.165441291281  | 4.466749097871  |
| C                       | 1.454676653457  | 0.405608128557  | 1.148443706915  |
| C                       | 2.116022521966  | 2.200583092593  | -2.127768198718 |
| O                       | -1.498394385992 | -0.301210851880 | 1.834552133950  |
| O                       | -2.052137482333 | -2.017478999172 | -2.918551661122 |
| O                       | -0.721574607783 | 2.844560238480  | -1.320107986190 |
| O                       | -0.325419892014 | -0.135120929601 | -4.724091705689 |
| O                       | 3.136254720216  | -0.111662492357 | -4.588088755488 |
| O                       | -2.518346806246 | 4.674950924642  | 0.325863561901  |
| O                       | 0.349573616362  | 1.453897796364  | 3.595685165762  |
| O                       | 0.949623038243  | 4.695358196431  | 0.464899780943  |
| O                       | 3.803247169327  | 1.476183463449  | 3.725339962402  |
| O                       | 2.108546349010  | -0.304678808215 | 1.831163736502  |
| O                       | 1.353137534167  | -2.010706731608 | -2.917428056477 |
| O                       | 2.729617655119  | 2.833578616294  | -1.338138798256 |
| TV                      | 6.967793428161  | -0.000000000022 | 0.000000000002  |
| TV                      | 0.148035089438  | 3.578702105784  | 0.000000000003  |
| TV                      | -0.553669974021 | 2.964866251215  | 9.800590188904  |

|                         |                 |                 |                 |
|-------------------------|-----------------|-----------------|-----------------|
| # EQ-CO <sub>2</sub> 23 |                 |                 |                 |
| C                       | 1.228863272311  | -0.719054992822 | -0.169789101543 |
| C                       | -0.493465465273 | 1.766314450084  | 2.459982492306  |
| C                       | 4.577592887090  | -0.718961953279 | -0.169792307153 |
| C                       | 2.855188029540  | 1.766325825954  | 2.460007163826  |
| C                       | 7.926182052984  | -0.719015454918 | -0.169724996445 |
| C                       | 6.203826153975  | 1.766389870523  | 2.460011893704  |
| O                       | -3.785322353612 | -4.001237718598 | 1.964341527455  |
| O                       | -0.436671847050 | -4.001249790805 | 1.964427353498  |
| O                       | 1.677804335435  | -1.696069901647 | 0.323774965686  |
| O                       | 5.026501036436  | -1.695993017706 | 0.323784116076  |
| O                       | 4.128800934176  | 0.258089711801  | -0.662984199667 |
| O                       | 3.183663893675  | 2.786989326509  | 2.959585588475  |
| O                       | 0.780120975472  | 0.258016003439  | -0.662996974467 |
| O                       | 2.911968066951  | -4.001188832496 | 1.964417871841  |
| O                       | -0.164953879282 | 2.786953664475  | 2.959577341298  |
| O                       | 8.375224625392  | -1.695997044024 | 0.323809949711  |
| O                       | 7.477365583556  | 0.258049068847  | -0.662899522462 |
| O                       | 6.532332349277  | 2.787030797138  | 2.959615210449  |
| TV                      | 10.046051639180 | 0.000000000059  | -0.000000000032 |
| TV                      | 2.966882942446  | 4.743313012948  | 0.000000000019  |
| TV                      | -3.220247488876 | 0.249723796478  | 5.267656140973  |

|                         |                 |                 |                 |
|-------------------------|-----------------|-----------------|-----------------|
| # EQ-CO <sub>2</sub> 24 |                 |                 |                 |
| C                       | -0.023811818132 | 1.196781327616  | 4.352587507548  |
| C                       | -1.853783601143 | -0.542462165254 | 1.118499246365  |
| C                       | -1.226881235044 | 4.720359616957  | -2.062934698237 |
| C                       | -0.004371387880 | 4.740014588033  | 4.273667169580  |
| C                       | -1.807223669073 | 2.946738718748  | 1.172793703753  |
| C                       | -1.161673370588 | 8.280742549446  | -2.150763124636 |
| O                       | -1.203873606304 | -1.136391346605 | 1.906802736709  |
| O                       | -1.879222046397 | 0.547729041846  | -2.882764679365 |

|    |                 |                 |                 |
|----|-----------------|-----------------|-----------------|
| O  | -0.555394403698 | 5.317751358991  | -1.293200364384 |
| O  | -0.122515981198 | -1.103365669287 | -4.517178227672 |
| O  | -0.098055771621 | 2.494817605482  | -4.637996619066 |
| O  | -2.474052306775 | 3.613045529184  | 0.457965837215  |
| O  | 0.642947372417  | 0.595706068136  | 3.583669997325  |
| O  | -2.449187709486 | 7.132416638601  | 0.328125311834  |
| O  | 0.657258530424  | 4.083703117486  | 3.546404311768  |
| O  | -1.142553507157 | 2.282252127475  | 1.890018250545  |
| O  | -1.897485736864 | 4.121611696429  | -2.832384088462 |
| O  | -0.497911859061 | 8.934090785253  | -1.420598098939 |
| TV | 3.587439966752  | -0.000000000011 | 0.000000000002  |
| TV | 0.055023012892  | 7.080596554936  | 0.000000000005  |
| TV | -0.569175934184 | 2.901402507352  | 9.639446440642  |

# EQ-CO<sub>2</sub> 25

|    |                 |                 |                 |
|----|-----------------|-----------------|-----------------|
| C  | -0.236946303218 | 0.258568713381  | -0.205886478035 |
| C  | -0.929245415341 | -0.369114927701 | 3.143880745958  |
| C  | 3.232522206138  | 0.255360258804  | -0.210112459390 |
| C  | 2.549507025171  | -0.375564633616 | 3.134829345426  |
| C  | 6.745903900086  | 0.307867212111  | -0.271297058025 |
| C  | 6.051438158792  | -0.411567269906 | 3.087768463852  |
| O  | -1.421121021106 | -4.650812353774 | 2.353420693947  |
| O  | 2.047794966566  | -4.654008729177 | 2.349183863474  |
| O  | 0.331036644838  | 0.962697981448  | 0.559172507370  |
| O  | 3.805142729251  | 0.956653183334  | 0.554256114004  |
| O  | 2.660928756399  | -0.445581137228 | -0.975116311755 |
| O  | 3.150889561648  | 0.274577617573  | 3.919913911883  |
| O  | -0.806067056447 | -0.443909580989 | -0.970989760668 |
| O  | 5.624849170069  | -4.706007013925 | 2.260900231321  |
| O  | -0.337930075366 | 0.282997807878  | 3.934486692832  |
| O  | 7.279364370405  | 0.974578047917  | 0.549440900057  |
| O  | 6.213170732973  | -0.356084089534 | -1.095010223391 |
| O  | 6.580592522273  | 0.253289318096  | 3.913381870886  |
| TV | 10.415376975393 | -0.000000000009 | 0.000000000003  |
| TV | -0.101384497965 | 3.630679121264  | -0.000000000015 |
| TV | -4.739933724410 | -5.061843361391 | 6.716193979196  |

# EQ-CO<sub>2</sub> 26

|    |                 |                 |                 |
|----|-----------------|-----------------|-----------------|
| C  | 0.789359370283  | -0.716439095261 | 0.006038323031  |
| C  | -1.432483040583 | 1.461797227607  | 2.182441772165  |
| C  | 5.152571048571  | -0.607333273380 | -0.007058910967 |
| C  | 2.927331595734  | 1.503635844848  | 2.186794949891  |
| C  | 9.512269584935  | -0.670060445593 | 0.016264616472  |
| C  | 7.322677787899  | 1.571731801200  | 2.192987595353  |
| O  | -1.526422788752 | -2.057854322892 | 3.016145033362  |
| O  | 2.896544506202  | -2.001804665602 | 3.009084477788  |
| O  | 0.765884355612  | -1.554964629424 | 0.839267364272  |
| O  | 5.071898928604  | -1.444981961616 | 0.823478695668  |
| O  | 5.234777084010  | 0.232677930075  | -0.835759612733 |
| O  | 2.934222757248  | 0.653721633401  | 1.364576811557  |
| O  | 0.817646173920  | 0.120096680437  | -0.828834635552 |
| O  | 7.288561329501  | -1.940494240456 | 3.022572529139  |
| O  | -1.360715996098 | 0.625679930872  | 1.349128704477  |
| O  | 9.493520503931  | -1.519852465753 | 0.838819974743  |
| O  | 9.530394469688  | 0.177872531172  | -0.807806277541 |
| O  | 7.338867147259  | 0.732400330132  | 1.360562332934  |
| TV | 13.118986478232 | -0.000000000000 | 0.000000000003  |

|    |                 |                |                 |
|----|-----------------|----------------|-----------------|
| TV | 0.022540611889  | 4.354917452501 | -0.000000000004 |
| TV | -0.075216204975 | 0.002903320113 | 4.363923581358  |

# EQ-CO<sub>2</sub> 27

|    |                 |                 |                 |
|----|-----------------|-----------------|-----------------|
| C  | 0.748341498014  | -0.658220249384 | -0.571396062787 |
| C  | -1.150617755498 | 0.016449386422  | 2.685544752727  |
| C  | 0.618871015516  | 2.740088761492  | -0.642619550957 |
| C  | -1.330161136344 | 3.426473820778  | 2.679888328493  |
| C  | 0.399716616774  | 6.132760480976  | -0.571507968491 |
| C  | -1.498157695398 | 6.841427961349  | 2.677819444110  |
| O  | -1.836077375954 | -0.610773843966 | 3.419285322990  |
| O  | -2.025960274353 | 2.821586082370  | 3.421757635343  |
| O  | 1.474163067010  | -1.204418458846 | 0.185700518406  |
| O  | 1.296338028461  | 2.202262702328  | 0.164912136577  |
| O  | -0.058668261510 | 3.277588654385  | -1.450347791062 |
| O  | -0.632588371072 | 4.033756117577  | 1.941386818207  |
| O  | 0.023122767101  | -0.109288978207 | -1.327856033569 |
| O  | -2.200628036177 | 6.253889003189  | 3.426505534072  |
| O  | -0.462018854363 | 0.642115786560  | 1.953159474158  |
| O  | 1.115859037696  | 5.557286842573  | 0.174164228841  |
| O  | -0.318780106640 | 6.705168779052  | -1.317035730724 |
| O  | -0.793982773536 | 7.428045733810  | 1.929321750457  |
| TV | 3.723117703221  | -0.000000000006 | -0.000000000003 |
| TV | -0.538789290198 | 10.244558916470 | -0.000000000189 |
| TV | -3.953715640358 | 1.417862471073  | 6.511786135401  |

# EQ-CO<sub>2</sub> 28

|    |                 |                 |                 |
|----|-----------------|-----------------|-----------------|
| C  | 0.319800347272  | -0.611241950445 | -0.574186797992 |
| C  | -0.271668093543 | 1.166624269278  | 2.735930957199  |
| C  | 3.729811299375  | -0.620565935805 | -0.575266652986 |
| C  | 3.109933200008  | 1.040300998096  | 2.741432173635  |
| C  | 7.169693621871  | -0.648896252833 | -0.573407528028 |
| C  | 6.556899487729  | 1.130790324637  | 2.735381068842  |
| O  | 0.297949101922  | -1.758885426996 | 3.496386841294  |
| O  | 3.678250512139  | -1.886803100078 | 3.503792600070  |
| O  | 0.899122914326  | -1.311458540402 | 0.183059277694  |
| O  | 4.312782289248  | -1.318129082369 | 0.181868098252  |
| O  | 3.148131638456  | 0.080620211694  | -1.330493455584 |
| O  | 2.519966238850  | 0.353809968511  | 1.979357272231  |
| O  | -0.259810629312 | 0.089766065824  | -1.330977999847 |
| O  | 7.133767697704  | -1.798870671569 | 3.494061995839  |
| O  | -0.863913645160 | 0.481083791057  | 1.975356419300  |
| O  | 7.767502839736  | -1.332923527630 | 0.184644554290  |
| O  | 6.572380854863  | 0.035644892400  | -1.331473180808 |
| O  | 5.958191974841  | 0.450409034259  | 1.974613084028  |
| TV | 10.269945975438 | -0.000000000001 | -0.000000000000 |
| TV | 0.021776686551  | 3.612367488279  | -0.000000000000 |
| TV | -1.236866261205 | -0.067316403813 | 6.619373110519  |

# EQ-CO<sub>2</sub> 29

|   |                 |                 |                 |
|---|-----------------|-----------------|-----------------|
| C | 5.876091493070  | -1.618650851760 | 0.996004968547  |
| C | 0.609347893352  | -1.637244965770 | -1.174885856788 |
| C | -2.552265916448 | -2.106230097255 | 1.513454626613  |
| C | 6.751610262298  | -2.581604598796 | 4.212287380210  |
| C | 1.484879259141  | -2.599971388884 | 2.041501469849  |
| C | -1.676782337218 | -3.069145700891 | 4.729880278472  |
| O | -2.488485090606 | -2.889150571293 | 0.629825220487  |

|    |                 |                 |                 |
|----|-----------------|-----------------|-----------------|
| O  | 4.763316405446  | -1.732333462115 | 0.606613952240  |
| O  | -0.500781038700 | -1.750198377904 | -1.568839628216 |
| O  | 1.721310926777  | -1.523204299204 | -0.783525620844 |
| O  | 2.596798816417  | -2.486019196459 | 2.433027192409  |
| O  | 6.985982948970  | -1.504520874554 | 1.389974401428  |
| O  | -2.616680822277 | -1.322688244308 | 2.396544902130  |
| O  | 7.861488562955  | -2.467497991761 | 4.606301774505  |
| O  | -1.741111623997 | -2.285496409901 | 5.612875170423  |
| O  | -1.613042460697 | -3.852169431312 | 3.846337303260  |
| O  | 5.638828674230  | -2.695260989408 | 3.822904022736  |
| O  | 0.374833525656  | -2.712908810959 | 1.647309647436  |
| TV | 12.460638216783 | -0.000000000008 | 0.000000000004  |
| TV | 1.762555708140  | 3.143617166452  | -0.000000000004 |
| TV | 1.751006098999  | -1.925926983298 | 6.432882984626  |

# EQ-CO<sub>2</sub> 30

|    |                 |                 |                 |
|----|-----------------|-----------------|-----------------|
| C  | 0.496014015063  | -0.953462281376 | -0.165533178217 |
| C  | -1.180514411318 | 1.278113085222  | 2.728329905612  |
| C  | 3.776016490232  | -0.913123631439 | -0.098070232700 |
| C  | 2.157703299853  | 1.282726863936  | 2.804927311797  |
| C  | 7.132770441877  | -0.928550187709 | -0.162305049848 |
| C  | 5.459925106661  | 1.278652016910  | 2.729788119949  |
| O  | -0.997453138220 | -2.359480613452 | 1.933900044834  |
| O  | 2.393151630968  | -2.334316167671 | 2.065381487308  |
| O  | 0.884779989950  | -0.178670931039 | 0.638378287776  |
| O  | 4.204580672997  | -0.085324198005 | 0.628764733460  |
| O  | 3.343123641532  | -1.738544428927 | -0.824999049528 |
| O  | 1.641934381116  | 0.519457388160  | 3.546030632360  |
| O  | 0.108747965543  | -1.730353288269 | -0.967351112968 |
| O  | 5.644756155517  | -2.362910872223 | 1.932990236900  |
| O  | -1.647059059832 | 0.537205069491  | 3.523584479455  |
| O  | 7.613604754265  | -0.072267577715 | 0.495851622450  |
| O  | 6.653253109554  | -1.782991515964 | -0.822652835753 |
| O  | 4.992948966287  | 0.540511802203  | 3.526988667625  |
| TV | 9.958759262873  | 0.000000000012  | 0.000000000003  |
| TV | 0.283455171120  | 4.379132410615  | -0.000000000003 |
| TV | -3.640837779129 | 0.074399813215  | 5.793136855927  |

# EQ-CO<sub>2</sub> 31

|   |                 |                 |                 |
|---|-----------------|-----------------|-----------------|
| C | 0.313641376966  | -0.742468100033 | -0.406091684170 |
| C | -0.373668351411 | 1.139915015664  | 2.799220782192  |
| C | 3.693424582062  | -0.659868444931 | -0.423311893296 |
| C | 2.993765016654  | 1.159944489119  | 2.791206153517  |
| C | 7.058808450018  | -0.658207628240 | -0.421941783378 |
| C | 6.354562406956  | 1.178100155568  | 2.792490137031  |
| O | 0.150250335663  | -3.305836555833 | 3.547588155360  |
| O | 3.521601899878  | -3.279924355910 | 3.542095577338  |
| O | 0.885905902311  | -0.022472137429 | 0.337661945905  |
| O | 4.260083943898  | 0.056433491302  | 0.329194868995  |
| O | 3.127071778969  | -1.374720629578 | -1.177110885030 |
| O | 2.433068042476  | 1.881551128289  | 2.039854894873  |
| O | -0.258406730856 | -1.463393714134 | -1.149722178830 |
| O | 6.877138561832  | -3.272989065523 | 3.536424206475  |
| O | -0.930524554003 | 1.867480243838  | 2.050584642671  |
| O | 7.630583932302  | 0.054772868400  | 0.329826920280  |
| O | 6.487011172538  | -1.369443565536 | -1.175050539776 |
| O | 5.797940269961  | 1.912508115240  | 2.050266213268  |

|    |                 |                 |                 |
|----|-----------------|-----------------|-----------------|
| TV | 10.097072936833 | 0.000000000008  | -0.000000000026 |
| TV | 0.033455723866  | 3.718346744387  | 0.000000000007  |
| TV | -1.423336458584 | -0.042648032880 | 6.425872221208  |

# EQ-CO<sub>2</sub> 32

|    |                 |                 |                 |
|----|-----------------|-----------------|-----------------|
| C  | -0.579988993545 | 0.578747582620  | -0.047567561139 |
| C  | -2.530630132984 | 2.962331468228  | 2.206337221647  |
| C  | 3.236560267031  | 0.578822366899  | -0.048109250927 |
| C  | 1.286271445613  | 2.962366929040  | 2.206262804510  |
| C  | 7.054180433630  | 0.578744793298  | -0.047661301971 |
| C  | 5.103351230780  | 2.962250903786  | 2.206293964463  |
| O  | -1.307449721619 | 0.593309140284  | -0.979680199084 |
| O  | 2.509025925527  | 0.593862608586  | -0.980148377529 |
| O  | 0.606417543631  | -1.777121923884 | -1.364915895075 |
| O  | 4.423375200213  | -1.776980114390 | -1.364990722625 |
| O  | 2.021547454280  | 2.943240897231  | 1.279917104071  |
| O  | 3.963825051227  | 0.565636319804  | 0.884172354491  |
| O  | -1.795361907760 | 2.943375439420  | 1.279986596898  |
| O  | 6.326459970033  | 0.593666552868  | -0.979573942392 |
| O  | 0.147239008829  | 0.565901984052  | 0.884777661451  |
| O  | 8.240906452751  | -1.777332502675 | -1.364762480342 |
| O  | 5.838902046790  | 2.942846189832  | 1.280175329451  |
| O  | 7.781735459705  | 0.565594388621  | 0.884422954908  |
| TV | 11.451293162623 | -0.000000000000 | -0.000000000000 |
| TV | -0.044604216774 | 4.738538160779  | 0.000000000000  |
| TV | -0.011842768095 | 0.019707674602  | 4.496808153335  |

# EQ-CO<sub>2</sub> 33

|    |                 |                 |                 |
|----|-----------------|-----------------|-----------------|
| C  | 2.791309483873  | 1.526199560182  | 2.406252103616  |
| C  | -0.887707485647 | 1.674730218337  | 0.631916395837  |
| C  | -4.541257698707 | 1.817038992593  | -1.123193075999 |
| C  | 0.039189513882  | 4.841415985169  | 2.406175979178  |
| C  | -3.627098191493 | 4.990955703696  | 0.626892801642  |
| C  | -7.281039438062 | 5.122932467711  | -1.140840310094 |
| O  | -0.323423997954 | 1.011100737566  | 1.432650043254  |
| O  | -4.000650785110 | 1.120592070694  | -1.912840005961 |
| O  | -1.453446742892 | 2.338236857489  | -0.168130608614 |
| O  | -0.062379304632 | 0.669442928287  | -2.171607033133 |
| O  | -2.808545614701 | 3.982741744142  | -2.165811933861 |
| O  | -5.082780470238 | 2.514039395502  | -0.335604671342 |
| O  | 3.333803141415  | 0.821300962193  | 1.626322373764  |
| O  | -7.824296955220 | 5.826293985867  | -0.360181718372 |
| O  | 0.575792842731  | 4.138944488001  | 1.620126997668  |
| O  | -3.058849530977 | 4.324726301701  | 1.422562873679  |
| O  | -6.738915809754 | 4.419928075894  | -1.923809630270 |
| O  | -4.197518954581 | 5.656997192428  | -0.167741710708 |
| TV | 7.010747286308  | -0.000000000014 | -0.000000000011 |
| TV | -5.490617550195 | 6.626281492149  | -0.000000000004 |
| TV | 2.307320178867  | 1.560410875810  | 5.357580715338  |

# EQ-CO<sub>2</sub> 34

|   |                 |                 |                 |
|---|-----------------|-----------------|-----------------|
| C | 0.376163874691  | 2.120415122020  | 2.942506125986  |
| C | 0.280212675316  | -0.540052601355 | 0.794239041208  |
| C | -1.691719397518 | 2.139887134219  | -1.420123114258 |
| C | 0.356329744005  | 7.292513983569  | 2.949005344941  |
| C | 0.246195401364  | 4.734106252119  | 0.724121341149  |
| C | -1.708660152543 | 7.376982762206  | -1.417032959989 |



|    |                 |                 |                 |
|----|-----------------|-----------------|-----------------|
| O  | -0.416397042719 | -0.526064058991 | 1.751981924402  |
| O  | -2.376120520979 | -3.036548466523 | -2.369389511169 |
| O  | -0.993462272535 | 2.086177908632  | -0.466398551874 |
| O  | -0.670918945414 | -0.475402217604 | -2.579708010372 |
| O  | -0.696670669700 | 4.754126244012  | -2.577683539346 |
| O  | -2.672440947220 | 4.782431309351  | -0.216868264026 |
| O  | 1.070605702158  | 2.158509568205  | 1.983837717990  |
| O  | -2.686379869988 | 9.907987404475  | -0.159350575514 |
| O  | 1.055947018592  | 7.271011786644  | 1.993678581372  |
| O  | -0.467093198969 | 4.684757667648  | 1.667118267070  |
| O  | -2.387513990771 | 2.193032712366  | -2.376353026592 |
| O  | -1.006933185460 | 7.325212202711  | -0.465821621759 |
| TV | 3.633084476971  | -0.000000000008 | -0.000000000007 |
| TV | -0.033342991822 | 10.464693815025 | 0.000000000007  |
| TV | 0.349785296288  | 2.557369732477  | 6.477500335161  |

# EQ-CO<sub>2</sub> 35

|    |                 |                 |                 |
|----|-----------------|-----------------|-----------------|
| C  | -1.571693254565 | 0.650361609240  | 4.434359669192  |
| C  | -2.127732614615 | 1.196720139469  | 1.086440384764  |
| C  | -2.735677218131 | 3.007269004103  | -2.080805439724 |
| C  | 1.860853737456  | 0.633325618707  | 4.445690665987  |
| C  | 1.291547604834  | 1.207218985335  | 1.091865117075  |
| C  | 0.662376610329  | 2.910230510740  | -2.143547236254 |
| O  | -1.012418564858 | -0.019738805391 | 3.634178694330  |
| O  | -2.108656528878 | 3.680750370773  | -2.824387743883 |
| O  | -1.538305654575 | 0.492727962427  | 0.340110932704  |
| O  | -0.626022185381 | 1.827980524095  | -4.633804233741 |
| O  | 2.822916680355  | 1.817063787032  | -4.616164531031 |
| O  | -3.362256065596 | 2.335438391681  | -1.335885460684 |
| O  | 0.702355549701  | 1.913402874144  | 1.837044915807  |
| O  | 0.098555118161  | 2.244557906882  | -1.344510093280 |
| O  | 4.132890523863  | 1.900528960826  | 1.832975449952  |
| O  | 2.404074459778  | -0.042888530265 | 3.639490959219  |
| O  | 1.224956829390  | 3.575453761677  | -2.943679363472 |
| O  | 1.880084657869  | 0.500920398761  | 0.347323070941  |
| TV | 6.850584327374  | 0.000000000016  | 0.000000000114  |
| TV | 0.122178504873  | 3.603820075356  | 0.000000000043  |
| TV | -1.505280034108 | -0.505105555152 | 9.865185211273  |

# EQ-CO<sub>2</sub> 36

|   |                 |                 |                 |
|---|-----------------|-----------------|-----------------|
| C | 0.934310770590  | -0.637881331659 | -0.087295671849 |
| C | -1.495065975976 | 1.170799186533  | 2.473507473182  |
| C | 0.961716442491  | 2.783137853882  | -0.087473565951 |
| C | -1.468044653642 | 4.591640636668  | 2.473364928400  |
| C | 0.989197556195  | 6.203911731765  | -0.087781114044 |
| C | -1.440975053943 | 8.012505682421  | 2.473439511336  |
| O | -0.542946744761 | -2.815177509919 | 2.124469343243  |
| O | -0.515578396092 | 0.606077550892  | 2.124487039449  |
| O | 1.904097156505  | -0.062867014637 | 0.269894601548  |
| O | 1.931631120065  | 3.357961928822  | 0.269670293631  |
| O | -0.008844491733 | 2.207640406815  | -0.441562847985 |
| O | -2.447049315801 | 5.156118586446  | 2.824489965268  |
| O | -0.036131433671 | -1.213561365656 | -0.441430217725 |
| O | -0.488735950041 | 4.026590342371  | 2.124379212734  |
| O | -2.474236456861 | 1.735033105789  | 2.824569997612  |
| O | 1.958983714008  | 6.778865431286  | 0.269486994745  |
| O | 0.018603880655  | 5.628432502068  | -0.441819826642 |

|    |                 |                 |                 |
|----|-----------------|-----------------|-----------------|
| O  | -2.420031103837 | 8.576936425991  | 2.824508328063  |
| TV | 4.741557748402  | 0.000000000002  | 0.000000000001  |
| TV | 0.081398283594  | 10.262808808241 | -0.000000000012 |
| TV | -4.883377940279 | 0.192244186400  | 5.119508698048  |

# EQ-CO<sub>2</sub> 37

|    |                  |                 |                 |
|----|------------------|-----------------|-----------------|
| C  | 4.461227880365   | -2.244481038551 | -0.156355897887 |
| C  | -7.072460507886  | 3.388967009199  | 2.567902081325  |
| C  | 2.816171737500   | 0.638590471699  | -0.144191778908 |
| C  | -8.732797215135  | 6.313247563127  | 2.525867899004  |
| C  | 1.161645314477   | 3.522280273780  | -0.152562143675 |
| C  | -10.387525010800 | 9.195878113820  | 2.523664812580  |
| O  | -0.595325101224  | -0.391273756559 | 2.080810945536  |
| O  | -2.253569091757  | 2.489975881036  | 2.073686802754  |
| O  | 5.552451946670   | -2.097318162081 | -0.589807881077 |
| O  | 3.903116585874   | 0.783584286836  | -0.588703670856 |
| O  | 1.729604584124   | 0.494822093139  | 0.300314341020  |
| O  | -8.174494933222  | 7.259492145007  | 2.965596520721  |
| O  | 3.370086843487   | -2.390471803928 | 0.277534652937  |
| O  | -3.883035493206  | 5.368785242577  | 2.083209794396  |
| O  | -6.482662165764  | 4.286327383950  | 3.063675991427  |
| O  | 2.251631319516   | 3.667000619323  | -0.589740691476 |
| O  | 0.070851056880   | 3.378652798059  | 0.283463761478  |
| O  | -9.825265510605  | 10.139253086792 | 2.964538905002  |
| TV | 5.407380997971   | -0.000000000028 | 0.000000000033  |
| TV | -4.948957829021  | 8.646656216867  | -0.000000000177 |
| TV | -1.973451045797  | 2.734364361884  | 5.375099592421  |

# EQ-CO<sub>2</sub> 38

|    |                 |                 |                 |
|----|-----------------|-----------------|-----------------|
| C  | 0.861363409459  | -0.653653525153 | -0.064362686384 |
| C  | -1.581348187540 | 1.097724064301  | 2.453105163866  |
| C  | 0.881318806440  | 2.892608524223  | -0.066832464013 |
| C  | -1.606622681927 | 4.636032820532  | 2.452611698064  |
| C  | 0.812000842987  | 6.423541671848  | -0.064148339035 |
| C  | -1.634890716709 | 8.174579051488  | 2.453043005375  |
| O  | -0.568421518130 | -3.053294978377 | 2.660645658223  |
| O  | -0.590159726421 | 0.485822206434  | 2.660599018526  |
| O  | 1.853642936964  | -0.043004774583 | -0.270497300757 |
| O  | 1.875449147901  | 3.501474200402  | -0.272494834803 |
| O  | -0.110002646443 | 2.280968644957  | 0.140084158781  |
| O  | -2.599196780379 | 5.245806526131  | 2.244393222857  |
| O  | -0.129465592998 | -1.266979048143 | 0.141037160071  |
| O  | -0.615085050139 | 4.024812699604  | 2.660565802669  |
| O  | -2.573630991442 | 1.707921914406  | 2.245225785793  |
| O  | 1.801329380933  | 7.038839958936  | -0.270462938804 |
| O  | -0.175980383753 | 5.805778214949  | 0.141426867445  |
| O  | -2.626718240136 | 8.785304546598  | 2.244965467162  |
| TV | 4.697796145595  | 0.000000000002  | 0.000000000001  |
| TV | -0.075186366587 | 10.616054669673 | -0.000000000012 |
| TV | -4.858514927479 | -0.043043730221 | 5.037965844032  |

# EQ-CO<sub>2</sub> 39

|   |                 |                 |                 |
|---|-----------------|-----------------|-----------------|
| C | 0.474808446793  | -0.705710936073 | -0.161336929811 |
| C | -1.296661311585 | 2.626726241436  | 2.512446136937  |
| C | 1.146781341761  | 2.624595769076  | -0.088334499613 |
| C | -0.630365671033 | 5.960411443125  | 2.515814488623  |
| C | 1.813965691311  | 5.958204263403  | -0.091427325316 |

|    |                 |                 |                 |
|----|-----------------|-----------------|-----------------|
| C  | 0.027993647791  | 9.292970805767  | 2.445258513039  |
| O  | -3.556195064164 | -3.304254929155 | 2.588228918103  |
| O  | -2.892190560653 | 0.026639518652  | 2.578385730965  |
| O  | 1.364825834307  | -1.475077753607 | -0.030217551406 |
| O  | 2.040952828153  | 1.852657112485  | -0.015642161042 |
| O  | 0.251197918487  | 3.396168851530  | -0.157812534948 |
| O  | 0.294451655521  | 5.223639829116  | 2.448415606518  |
| O  | -0.416791363526 | 0.063304755571  | -0.289021272405 |
| O  | -2.221546540102 | 3.361598008486  | 2.589794632928  |
| O  | -0.371092262259 | 1.891570748025  | 2.439624994551  |
| O  | 2.710268501825  | 5.189061349595  | -0.015921766391 |
| O  | 0.916316161632  | 6.727146266396  | -0.163773979556 |
| O  | 0.948091901704  | 8.558228849846  | 2.317940174260  |
| TV | 4.674844213818  | -0.000000000004 | 0.000000000002  |
| TV | 2.001715744461  | 10.001081961133 | -0.000000000032 |
| TV | -4.988944537745 | 0.096238657340  | 5.213009989104  |

# EQ-CO<sub>2</sub> 40

|    |                 |                 |                 |
|----|-----------------|-----------------|-----------------|
| C  | 0.754856143802  | -0.691217830906 | -0.205944276089 |
| C  | -1.044094903388 | 2.668449627043  | 2.478791449472  |
| C  | 1.439310497082  | 2.662002700716  | -0.205979104278 |
| C  | -0.359618506026 | 6.021679107840  | 2.478806391980  |
| C  | 2.123804742165  | 6.015253026411  | -0.205910331765 |
| C  | 0.324839303532  | 9.374928140761  | 2.478738329531  |
| O  | -3.316740909912 | -3.283598153214 | 2.608637682386  |
| O  | -2.632350812457 | 0.069564784314  | 2.608553468364  |
| O  | 1.645952139920  | -1.466961098713 | -0.126480513699 |
| O  | 2.330456948706  | 1.886321433888  | -0.126503299598 |
| O  | 0.549277373516  | 3.438127103767  | -0.287441949803 |
| O  | 0.544373063707  | 5.267769348173  | 2.351014383018  |
| O  | -0.135126782138 | 0.084964398685  | -0.287455691964 |
| O  | -1.947778224736 | 3.422878913203  | 2.608604942490  |
| O  | -0.140139500225 | 1.914488534171  | 2.351015903609  |
| O  | 3.014934933750  | 5.239550789094  | -0.126450073664 |
| O  | 1.233761147942  | 6.791369216362  | -0.287417023063 |
| O  | 1.228888234142  | 8.621073480643  | 2.350963472718  |
| TV | 4.643937371786  | 0.000000000001  | 0.000000000005  |
| TV | 2.053396289458  | 10.059662821996 | -0.000000000048 |
| TV | -4.884614436910 | -0.031342473019 | 5.286463439064  |

# EQ-CO<sub>2</sub> 41

|   |                 |                 |                 |
|---|-----------------|-----------------|-----------------|
| C | 6.846162180985  | -0.948363263645 | 2.482617889528  |
| C | -0.621284223376 | -1.671909246597 | -2.561340572729 |
| C | -2.390048972743 | -1.762534415209 | 1.550317213332  |
| C | 8.306782687858  | -1.776444636282 | 5.502325575415  |
| C | 0.818838920422  | -2.527375604814 | 0.414007753620  |
| C | -1.036307250126 | -2.632718467436 | 4.528504898009  |
| O | -2.325902336220 | -2.501134352941 | 0.627979202192  |
| O | 7.090002428987  | -1.753702800416 | 1.650118779666  |
| O | -0.486727147340 | -2.422125093161 | -3.467368595909 |
| O | -0.755604282649 | -0.922489807378 | -1.653966127632 |
| O | 0.676549698093  | -1.774344449322 | 1.317279066434  |
| O | 6.601882157799  | -0.142255245771 | 3.314009972112  |
| O | -2.453238460277 | -1.025454929697 | 2.473507573246  |
| O | 8.252739029653  | -1.035966156325 | 6.423934265426  |
| O | -1.179760009235 | -1.881752175615 | 5.432446097777  |
| O | -0.898785707969 | -3.383663013713 | 3.624463689860  |

|    |                 |                 |                 |
|----|-----------------|-----------------|-----------------|
| O  | 8.363904539689  | -2.518029456478 | 4.581992481429  |
| O  | 0.961970892584  | -3.280440037587 | -0.488774204268 |
| TV | 12.466263328381 | 0.000000000000  | 0.000000000000  |
| TV | 1.301786324373  | 3.326018356966  | -0.000000000009 |
| TV | 2.860246182966  | -1.707151501110 | 5.950691718470  |

# EQ-CO<sub>2</sub> 42

|    |                 |                 |                 |
|----|-----------------|-----------------|-----------------|
| C  | -0.265516938631 | 0.912972678075  | -1.411602015631 |
| C  | -2.070163414598 | 3.635647419356  | 2.120760743810  |
| C  | 3.206959855719  | 0.872270751555  | -1.386319856156 |
| C  | 1.460110579203  | 3.637913648173  | 2.141447864904  |
| C  | 6.748673657908  | 0.927646884207  | -1.396375587224 |
| C  | 5.002817421128  | 3.596380223492  | 2.142061654671  |
| O  | -0.858216859232 | 0.248335021361  | -2.189711052232 |
| O  | 2.618929974078  | 0.201837175612  | -2.164296370144 |
| O  | 0.827586815683  | -1.758836130721 | -0.620578474157 |
| O  | 4.438520599860  | -1.741228142831 | -0.615141829359 |
| O  | 2.117912409574  | 3.027905073074  | 1.370278410445  |
| O  | 3.800478139917  | 0.973726898451  | 2.925902722183  |
| O  | -1.472569510386 | 2.974884742331  | 1.343009889195  |
| O  | 6.093865405584  | 0.311677018906  | -2.165185296541 |
| O  | 0.339577204164  | 1.006920246953  | 2.899519688566  |
| O  | 7.896392460932  | -1.712187230770 | -0.636264405268 |
| O  | 5.593668384686  | 2.926168767487  | 1.365966166491  |
| O  | 7.411330384181  | 0.973953551393  | 2.907297398861  |
| TV | 10.543905022403 | -0.000000000000 | -0.000000000003 |
| TV | -0.032073235497 | 6.577761034684  | 0.000000000001  |
| TV | 0.008563262527  | -0.569635782122 | 3.533845663167  |

# EQ-CO<sub>2</sub> 43

|    |                 |                 |                |
|----|-----------------|-----------------|----------------|
| C  | -1.853278399930 | -0.496318526287 | 0.563561561010 |
| C  | 1.008649392182  | 1.188850431715  | 2.152346690668 |
| C  | -3.070750112322 | -0.727441833106 | 3.806397094343 |
| C  | -0.223885417715 | 0.965213940045  | 5.457700845768 |
| C  | -4.317266643517 | -0.954409134176 | 7.104844405121 |
| C  | -1.461288774622 | 0.692018886749  | 8.818256937537 |
| O  | 1.892077417726  | -1.714052624472 | 1.832049629186 |
| O  | 0.659766125437  | -1.940668502144 | 5.131280955171 |
| O  | -0.953020764381 | -1.154036350632 | 0.165738582168 |
| O  | -2.158982631997 | -1.402800544541 | 3.470711395570 |
| O  | -3.982094637486 | -0.051074070906 | 4.140900896269 |
| O  | -1.126278402302 | 0.272457811356  | 5.783415713695 |
| O  | -2.753307518909 | 0.161111916882  | 0.963383287589 |
| O  | -0.546187256434 | -2.227594305002 | 8.560346739721 |
| O  | 0.105967241552  | 0.493891078247  | 2.471927870409 |
| O  | -3.405123547046 | -1.626362598363 | 6.763031418801 |
| O  | -5.228698241682 | -0.281037599019 | 7.445834339766 |
| O  | -2.393826563338 | 0.012779606248  | 9.079799001983 |
| TV | 6.916255860969  | 0.000000000000  | 0.000000000001 |
| TV | 0.018521924799  | 3.598674902351  | 0.000000000000 |
| TV | -3.715526939895 | -0.695160137001 | 9.909754641363 |

# EQ-CO<sub>2</sub> 44

|   |                 |                 |                 |
|---|-----------------|-----------------|-----------------|
| C | 0.732358966368  | -0.725050926573 | -0.217688149511 |
| C | -1.438716793624 | 1.379677486761  | 2.605705994711  |
| C | 0.845639413829  | 2.541657939355  | -0.222845000711 |
| C | -1.326293136129 | 4.668764739560  | 2.606938689763  |

|    |                 |                 |                 |
|----|-----------------|-----------------|-----------------|
| C  | 0.960169703273  | 5.868799193871  | -0.218739314392 |
| C  | -1.215929047549 | 7.956547498322  | 2.608839414061  |
| O  | -0.682566022368 | -2.379990178472 | 1.972413612799  |
| O  | -0.565060794615 | 0.899967015164  | 1.968474108860  |
| O  | 1.634350728442  | -0.292936509302 | 0.413989971486  |
| O  | 1.746512461904  | 2.978546546385  | 0.407082213759  |
| O  | -0.055536421779 | 2.104885012528  | -0.852615581329 |
| O  | -2.202454887655 | 5.134526692740  | 3.251138647880  |
| O  | -0.169430012813 | -1.157086072263 | -0.849638393020 |
| O  | -0.450035858731 | 4.203080635104  | 1.962907511130  |
| O  | -2.312216700050 | 1.858742930133  | 3.243618261212  |
| O  | 1.861096492422  | 6.301743329908  | 0.414057322861  |
| O  | 0.058866630905  | 5.435729781626  | -0.850521635177 |
| O  | -2.089290342511 | 8.437303913120  | 3.245786770618  |
| TV | 4.406091438229  | 0.000000000002  | 0.000000000001  |
| TV | 0.340734663144  | 9.856822846469  | -0.000000000011 |
| TV | -4.457746886240 | 0.928814292752  | 5.653275174038  |

# EQ-CO<sub>2</sub> 45

|    |                 |                 |                 |
|----|-----------------|-----------------|-----------------|
| C  | 6.695481258780  | -1.234008661217 | 2.545561875980  |
| C  | -0.900667378480 | -1.815625504523 | -2.713934237002 |
| C  | -2.774497201669 | -1.920566130598 | 1.476734669079  |
| C  | 7.979238645897  | 1.902387538020  | 2.535896223696  |
| C  | 0.452376978515  | 1.287202875952  | -2.715048149481 |
| C  | -1.505828979360 | 1.232267375944  | 1.437711513144  |
| O  | -2.617288178712 | -2.555840088576 | 0.490082352142  |
| O  | 6.770783009385  | -1.913792015895 | 1.579442756415  |
| O  | -0.745301282902 | -2.497987552140 | -3.669395844438 |
| O  | -1.059775652439 | -1.134148865974 | -1.758246894795 |
| O  | 0.280817467680  | 1.954214985338  | -1.751459315060 |
| O  | 6.621382588112  | -0.553129241543 | 3.511069251324  |
| O  | -2.936569162046 | -1.285938015984 | 2.462873131291  |
| O  | 7.807054164699  | 2.552875307269  | 3.509912571523  |
| O  | -1.579882960863 | 1.915237361535  | 2.401455456683  |
| O  | -1.435029612996 | 0.548727985716  | 0.474356800403  |
| O  | 8.153010319619  | 1.253812460792  | 1.560975518607  |
| O  | 0.621727984048  | 0.619097317172  | -3.677996080886 |
| TV | 12.658486734329 | -0.000000000000 | 0.000000000009  |
| TV | 2.716657431970  | 6.204622036411  | -0.000000000020 |
| TV | 1.390425611734  | -0.868106724774 | 3.179600543004  |

# EQ-CO<sub>2</sub> 46

|   |                 |                 |                 |
|---|-----------------|-----------------|-----------------|
| C | 1.009496951024  | -1.449568893170 | -0.362352041413 |
| C | -0.506318766285 | 0.979023405192  | 2.356909063889  |
| C | 4.344009645473  | -1.432697249785 | -0.320617810680 |
| C | 2.828902774470  | 0.976098381383  | 2.395811804183  |
| C | 7.714560218194  | -1.446509057359 | -0.357892008178 |
| C | 6.197688938331  | 0.974806998574  | 2.360761540872  |
| O | 0.015281003133  | 0.068640525028  | 2.902738012425  |
| O | 3.326413306759  | 0.078803782848  | 2.983905556689  |
| O | 0.590122246134  | -2.411961315309 | -0.907867407164 |
| O | 3.949076975670  | -2.381176294940 | -0.907520773245 |
| O | 4.738352174245  | -0.484898125451 | 0.267771410084  |
| O | 2.328624331455  | 1.872603129385  | 1.808597578009  |
| O | 1.430998197872  | -0.488501577828 | 0.183726588425  |
| O | 6.725254449369  | 0.061955711006  | 2.896321849861  |
| O | -1.029055674702 | 1.887336502345  | 1.809021487292  |

|    |                 |                 |                 |
|----|-----------------|-----------------|-----------------|
| O  | 7.290829530285  | -2.410673047028 | -0.896640881095 |
| O  | 8.139351139608  | -0.482746396187 | 0.180752461600  |
| O  | 5.668612870453  | 1.885182204138  | 1.822707925035  |
| TV | 10.057439211677 | -0.000000000010 | -0.000000000012 |
| TV | -0.261005164634 | 4.563836901055  | -0.000000000079 |
| TV | -2.779518748646 | 0.279579315265  | 5.434829459822  |

# EQ-CO<sub>2</sub> 47

|    |                 |                 |                 |
|----|-----------------|-----------------|-----------------|
| C  | -1.926933066214 | -0.484398995214 | 0.418525048251  |
| C  | 1.624606535784  | 1.538821765832  | 2.062227590669  |
| C  | -1.025399910495 | 2.850591311497  | 0.479418948366  |
| C  | 2.534980762040  | 4.883588984354  | 2.132152687788  |
| C  | -0.144600770807 | 6.181412352810  | 0.489527716854  |
| C  | 3.400887558888  | 8.212389785480  | 2.127656131511  |
| O  | 1.875556887749  | -1.463444830546 | 1.778359320272  |
| O  | 2.690036666973  | 1.856688192863  | 1.657136939925  |
| O  | -0.860172690154 | -0.171841201900 | 0.012559901108  |
| O  | 0.061152440273  | 3.166461135243  | 0.131144454909  |
| O  | -2.110642539707 | 2.534298826434  | 0.830833901990  |
| O  | 1.448773117767  | 4.569740928900  | 2.482352109469  |
| O  | -2.994711592274 | -0.796699596980 | 0.822787009540  |
| O  | 3.621839804527  | 5.197652784705  | 1.783198803945  |
| O  | 0.558186494421  | 1.220689995634  | 2.466102470462  |
| O  | 0.942140623006  | 6.493537610085  | 0.139000083659  |
| O  | -1.231046395064 | 5.869254575258  | 0.840766484243  |
| O  | 2.312485396579  | 7.906117090883  | 2.477892356477  |
| TV | 7.444488521694  | -0.000000000001 | 0.000000000001  |
| TV | 2.614051570686  | 9.982554636431  | -0.000000000009 |
| TV | -1.213083604078 | 0.730944293130  | 3.288164513343  |

# EQ-CO<sub>2</sub> 48

|    |                 |                 |                 |
|----|-----------------|-----------------|-----------------|
| C  | 0.561737484126  | 2.707904678010  | 3.022155840878  |
| C  | -1.232758973524 | 0.204648106323  | 0.782338227645  |
| C  | -3.080138063991 | 2.824222498160  | -1.468278859479 |
| C  | 4.074662651146  | 2.721534306673  | 3.069884832483  |
| C  | 2.324423529424  | 0.203380159641  | 0.785683360035  |
| C  | 0.475951732966  | 2.823904758292  | -1.473574940047 |
| O  | -0.584370688109 | 0.135180550554  | 1.769888184411  |
| O  | -2.441144353020 | 2.815619232532  | -2.465432546811 |
| O  | -1.879727778135 | 0.272332556334  | -0.206613294669 |
| O  | -0.414505779831 | 0.320378494948  | -2.737230229014 |
| O  | 3.055919478765  | 0.323056623412  | -2.716512083125 |
| O  | -3.718976340803 | 2.836140778232  | -0.473077913394 |
| O  | 1.200874760047  | 2.621956727867  | 2.030576847207  |
| O  | -0.172130290766 | 2.834952677722  | -0.484381497008 |
| O  | 4.756519656001  | 2.646980522853  | 2.106946712300  |
| O  | 2.978136064389  | 0.134305883400  | 1.769934941959  |
| O  | 1.123462226557  | 2.816022623379  | -2.464800693380 |
| O  | 1.672258073936  | 0.271106682998  | -0.199518694421 |
| TV | 7.112004342467  | -0.000000000000 | 0.000000000000  |
| TV | -0.058029744375 | 5.060847623918  | -0.000000000000 |
| TV | 0.338976125650  | 2.471048637853  | 6.753631915549  |

# EQ-CO<sub>2</sub> 49

|   |                 |                 |                 |
|---|-----------------|-----------------|-----------------|
| C | 6.866079998911  | -1.120326570019 | 2.541636026201  |
| C | -0.841597462370 | -1.719026060608 | -2.725102728844 |
| C | -2.697730403034 | -1.866263870099 | 1.438179361597  |

|    |                 |                 |                 |
|----|-----------------|-----------------|-----------------|
| C  | 8.148168437809  | 2.018210886898  | 2.534586098707  |
| C  | 0.518280344358  | 1.388272417086  | -2.729282095861 |
| C  | -1.373555469367 | 1.263926707128  | 1.505319367293  |
| O  | -2.625393230603 | -2.556137783566 | 0.479336205361  |
| O  | 7.045602446714  | -1.772336705553 | 1.569657095048  |
| O  | -0.662540684050 | -2.378075082972 | -3.691856221080 |
| O  | -1.025015979697 | -1.062809921206 | -1.756658871298 |
| O  | 0.347062271202  | 2.051320496879  | -1.763664164974 |
| O  | 6.687793401231  | -0.471004273570 | 3.514942607736  |
| O  | -2.770797166450 | -1.176918852221 | 2.397485722479  |
| O  | 8.068388306463  | 2.706941833164  | 3.494345959231  |
| O  | -1.536789754669 | 1.894350947259  | 2.494425717030  |
| O  | -1.212323008792 | 0.635781806302  | 0.515148131019  |
| O  | 8.228797612705  | 1.329840068113  | 1.574767207880  |
| O  | 0.686108677432  | 0.722372589185  | -3.693273818936 |
| TV | 12.720618007877 | -0.000000000001 | 0.000000000009  |
| TV | 2.718479455792  | 6.213597654872  | -0.000000000018 |
| TV | 1.385707394459  | -0.864199346568 | 3.175880272474  |

# EQ-CO<sub>2</sub> 50

|    |                 |                 |                 |
|----|-----------------|-----------------|-----------------|
| C  | 0.748744843410  | -0.714326613941 | -0.154326667733 |
| C  | -1.003241685190 | 2.661691641523  | 2.483630652303  |
| C  | 1.508471321496  | 2.587482892118  | -0.156549094562 |
| C  | -0.253598538524 | 5.955273950152  | 2.414193201222  |
| C  | 2.249872654178  | 5.892769646167  | -0.222387864556 |
| C  | 0.511178773520  | 9.271634482996  | 2.479293602541  |
| O  | -3.419603416185 | -3.222801234731 | 2.619142492966  |
| O  | -2.652981946864 | 0.110077090775  | 2.625952264028  |
| O  | 1.627246894259  | -1.494973646395 | -0.006842343898 |
| O  | 2.398079074566  | 1.820519255767  | -0.006850688830 |
| O  | 0.621436085263  | 3.357056884767  | -0.304139727296 |
| O  | 0.650870763480  | 5.219940015833  | 2.208055210440  |
| O  | -0.129707332763 | 0.065571789903  | -0.299069754789 |
| O  | -1.909351835422 | 3.410981196556  | 2.626226577591  |
| O  | -0.098285867319 | 1.912032858946  | 2.341664318957  |
| O  | 3.133877897534  | 5.133233644868  | -0.013041345722 |
| O  | 1.366557173713  | 6.652344909517  | -0.431336407260 |
| O  | 1.417551544192  | 8.524227397204  | 2.334198127948  |
| TV | 4.710711998917  | 0.000000000001  | 0.000000000005  |
| TV | 2.258920144265  | 9.911173881381  | -0.000000000042 |
| TV | -4.907499956661 | 0.057571658488  | 5.271708706322  |

# EQ-CO<sub>2</sub> 51

|   |                 |                 |                 |
|---|-----------------|-----------------|-----------------|
| C | 3.740226634278  | -1.771878543455 | 0.490474771771  |
| C | 0.567675668217  | -1.684571270574 | -1.161167293144 |
| C | -0.678020824341 | -1.899922041098 | 2.036456979538  |
| C | 4.312076889819  | 1.611083302089  | 0.553085465606  |
| C | 1.160649016931  | 1.667178919897  | -1.157731622862 |
| C | -0.070083887109 | 1.436124560636  | 2.043680762561  |
| O | 0.151538720928  | -2.633506492089 | 1.619051092100  |
| O | 4.563764662739  | -2.472086650168 | 0.006757563831  |
| O | 1.478028681665  | -2.419033426002 | -1.342503999512 |
| O | -0.342520395984 | -0.950690887105 | -0.975753344739 |
| O | 0.238285363122  | 2.385644292760  | -0.973797750167 |
| O | 2.919006592317  | -1.072425433132 | 0.977793331308  |
| O | -1.509335868133 | -1.167272854997 | 2.453520479277  |
| O | 3.500237423183  | 2.358317412559  | 0.982491492701  |

|    |                 |                 |                 |
|----|-----------------|-----------------|-----------------|
| O  | -0.889132999081 | 2.180431268122  | 2.463876219002  |
| O  | 0.747467725117  | 0.691214234893  | 1.621715790621  |
| O  | 5.126813146754  | 0.864094730789  | 0.129381200373  |
| O  | 2.083703869892  | 0.948703610025  | -1.339280626001 |
| TV | 7.438821398750  | -0.000000000001 | 0.000000000000  |
| TV | 1.182440878918  | 6.699393158923  | -0.000000000000 |
| TV | 1.930585563458  | -0.292195725858 | 4.913343897082  |

# EQ-CO<sub>2</sub> 52

|    |                 |                 |                 |
|----|-----------------|-----------------|-----------------|
| C  | 0.764472695233  | -1.464521716180 | -0.398986977103 |
| C  | -0.434405688070 | 0.809462624746  | 2.419282642017  |
| C  | 4.074479110069  | -1.402873793235 | -0.394533920450 |
| C  | 2.878287642692  | 0.696863622892  | 2.426097029247  |
| C  | 7.385453803831  | -1.416359202007 | -0.398571449572 |
| C  | 6.171281912635  | 0.819610854123  | 2.413773734735  |
| O  | -0.010007029113 | -0.061973395992 | 3.097982024988  |
| O  | 3.367129065804  | -0.207144506799 | 3.012281560559  |
| O  | 0.311594549411  | -2.309744113797 | -1.091387690065 |
| O  | 3.592091392209  | -2.310315612060 | -0.979853622852 |
| O  | 4.555003224209  | -0.493782816317 | 0.190309203381  |
| O  | 2.388347785070  | 1.598867782942  | 1.839205285013  |
| O  | 1.216389322676  | -0.619761915172 | 0.294257264125  |
| O  | 6.668483170458  | -0.084604416560 | 2.991715882768  |
| O  | -0.859147339118 | 1.681045326970  | 1.740864680519  |
| O  | 6.902183547519  | -2.330515618384 | -0.973020828085 |
| O  | 7.868886491238  | -0.502480522198 | 0.176485722135  |
| O  | 5.673385720335  | 1.723762551131  | 1.835836881401  |
| TV | 9.926774488603  | -0.000000000012 | -0.000000000009 |
| TV | -0.015441363246 | 4.418567911295  | -0.000000000076 |
| TV | -2.393986867413 | 0.020466161130  | 5.634551764202  |

# EQ-CO<sub>2</sub> 53

|    |                 |                 |                 |
|----|-----------------|-----------------|-----------------|
| C  | 0.393972844521  | -0.835518665211 | -0.069360154464 |
| C  | -0.864466616588 | 1.557869464859  | 2.625621555912  |
| C  | 3.783284639255  | -0.704103373534 | -0.084773199244 |
| C  | 2.520556301832  | 1.505510912209  | 2.606856557506  |
| C  | 7.155575459981  | -0.701539006802 | -0.085990790762 |
| C  | 5.946703517129  | 1.427876741466  | 2.635863604962  |
| O  | -0.485904104427 | -3.968300260523 | 3.150193000806  |
| O  | 2.887083838816  | -3.998537166005 | 3.177868174636  |
| O  | 0.902859064185  | 0.099949761093  | 0.445284809591  |
| O  | 4.279362098063  | 0.224644998647  | 0.455064005325  |
| O  | 3.286525368978  | -1.631378903153 | -0.625096195490 |
| O  | 2.011387805970  | 2.406852478949  | 2.034730544932  |
| O  | -0.115545578823 | -1.770913961527 | -0.583872328849 |
| O  | 6.263752592724  | -4.131566254164 | 3.158410145266  |
| O  | -1.385400845017 | 2.483364621903  | 2.102555988227  |
| O  | 7.667529957896  | 0.230924911989  | 0.432232545428  |
| O  | 6.642401770180  | -1.631586844691 | -0.605696707739 |
| O  | 5.491766560986  | 2.386902236758  | 2.114117133501  |
| TV | 10.118841375068 | 0.000000000009  | -0.000000000027 |
| TV | 0.141183783826  | 4.601810375556  | 0.000000000007  |
| TV | -2.842187660917 | -0.081636960288 | 5.401411345046  |

# EQ-CO<sub>2</sub> 54

|   |                 |                 |                |
|---|-----------------|-----------------|----------------|
| C | -0.841988570940 | -1.295699151043 | 0.138810514928 |
| C | 0.934491016109  | 2.883633920499  | 1.808815634828 |



|    |                 |                 |                 |
|----|-----------------|-----------------|-----------------|
| C  | 2.653623720989  | -1.283916953952 | 0.146133685350  |
| C  | 4.398200394276  | 2.867357543970  | 1.800464229542  |
| C  | 6.149840413187  | -1.338498356640 | 0.148600369444  |
| C  | 7.888643139111  | 2.878310089725  | 1.804895581802  |
| O  | 1.558193468125  | -3.264952987552 | 2.151775438744  |
| O  | 5.003025432250  | -3.271739934361 | 2.149141540966  |
| O  | -0.208216738461 | -2.234862647201 | -0.202261225049 |
| O  | 3.282471511391  | -2.225811078043 | -0.196039444149 |
| O  | 2.024488989196  | -0.343233764120 | 0.491709754674  |
| O  | 3.787671459843  | 1.914316777565  | 1.454734986115  |
| O  | -1.475322483698 | -0.356858322746 | 0.482237226982  |
| O  | 8.513940994862  | -3.271863235560 | 2.148912361288  |
| O  | 0.306344952161  | 1.940640288845  | 1.468031110858  |
| O  | 6.731206072851  | -2.316097634800 | -0.178324978340 |
| O  | 5.568776791797  | -0.362338759011 | 0.479400770043  |
| O  | 7.257155209567  | 1.937791746287  | 1.463751806065  |
| TV | 10.474767620204 | -0.000000000001 | 0.000000000001  |
| TV | 0.005037408177  | 7.090892632055  | -0.000000000004 |
| TV | -0.005927324144 | 1.239582085688  | 3.315515327288  |

# EQ-CO<sub>2</sub> 55

|    |                 |                 |                 |
|----|-----------------|-----------------|-----------------|
| C  | 0.590960472425  | 2.930306783610  | 3.002283732858  |
| C  | -1.340486217559 | 0.314676747044  | 0.782673396799  |
| C  | -3.112558079783 | 3.133305006506  | -1.446035726351 |
| C  | 4.104665535651  | 3.017605238980  | 3.000433488857  |
| C  | 2.174261243562  | 0.316632039233  | 0.784254262642  |
| C  | 0.398714644605  | 2.978996544364  | -1.439179906154 |
| O  | -0.702643819965 | 0.172139787847  | 1.769842715900  |
| O  | -2.469815196913 | 3.110825280508  | -2.440213613182 |
| O  | -1.979356694991 | 0.453146873668  | -0.204674394271 |
| O  | -0.366194865134 | 0.355698146412  | -2.676717880379 |
| O  | 3.153268849422  | 0.524420513288  | -2.680962947127 |
| O  | -3.756512852275 | 3.158440699731  | -0.454115755948 |
| O  | 1.231604418886  | 2.895170649883  | 2.008096460542  |
| O  | -0.242735975500 | 3.008387500026  | -0.445527384675 |
| O  | 4.738841934141  | 2.899590766580  | 2.008459535213  |
| O  | 2.810165266968  | 0.176737631946  | 1.772821905562  |
| O  | 1.040354934292  | 2.949130390459  | -2.433855465551 |
| O  | 1.537355613755  | 0.453843141280  | -0.204443554248 |
| TV | 7.029863693902  | -0.000000000012 | 0.000000000001  |
| TV | 0.039657273876  | 5.289538644906  | 0.000000000067  |
| TV | 0.317490105662  | 2.607373489701  | 6.674881715604  |

# EQ-CO<sub>2</sub> 56

|   |                 |                |                 |
|---|-----------------|----------------|-----------------|
| C | 0.610585448562  | 0.827569949857 | 3.107448528174  |
| C | -2.082024580446 | 1.240043493825 | 0.803935896422  |
| C | -4.454797980977 | 2.950093898319 | -1.483801493863 |
| C | 0.692511248792  | 4.270353517505 | 3.107226284772  |
| C | -2.000788573513 | 4.682490063111 | 0.804704652711  |
| C | -4.369397563530 | 6.387710347667 | -1.468152674335 |
| O | 0.427854707634  | 0.229427828081 | 2.101914627290  |
| O | -4.206188015620 | 3.525057621398 | -2.487720409275 |
| O | -2.119512334076 | 0.639133330429 | -0.214444649967 |
| O | -1.656906928615 | 1.821454928016 | -2.812518917250 |
| O | -1.574826671782 | 5.264626848216 | -2.812965383113 |
| O | -4.702792566244 | 2.374976666572 | -0.479611581582 |
| O | 3.069512097676  | 1.841262986219 | 1.823540159284  |

|    |                 |                 |                 |
|----|-----------------|-----------------|-----------------|
| O  | -4.621443271092 | 5.807472899572  | -0.468012355940 |
| O  | 3.151443157962  | 5.283805386778  | 1.824298506057  |
| O  | 0.509678758536  | 3.671830003028  | 2.101937534341  |
| O  | -4.115802929302 | 6.968181563793  | -2.467291269608 |
| O  | -2.039026697732 | 4.081830300257  | -0.213791696418 |
| TV | 5.117200527627  | 0.000000000008  | 0.000000000088  |
| TV | 0.163645051764  | 6.885225522689  | 0.000000000068  |
| TV | 2.456671852128  | -0.395469964670 | 6.922413053890  |

# EQ-CO<sub>2</sub> 57

|    |                 |                 |                 |
|----|-----------------|-----------------|-----------------|
| C  | 0.674251008588  | -0.796114953337 | -0.157117370129 |
| C  | -1.056695303157 | 2.509238402231  | 2.487582939600  |
| C  | 1.476631530074  | 2.463051985546  | -0.155022835073 |
| C  | -0.228798098607 | 5.786546125383  | 2.555985944951  |
| C  | 2.298094242225  | 5.695970043489  | -0.086699787172 |
| C  | 0.569257540971  | 9.022625342586  | 2.490764762833  |
| O  | -3.572141150643 | -3.219064886705 | 2.778703146351  |
| O  | -2.755513613698 | 0.018344484462  | 2.774488703535  |
| O  | 1.517899360492  | -1.573313531919 | 0.135186873212  |
| O  | 2.317740991444  | 1.682066371247  | 0.134019726221  |
| O  | 0.634616644116  | 3.244401860347  | -0.441045429723 |
| O  | 0.683901931357  | 5.064877437277  | 2.336072228902  |
| O  | -0.169320859974 | -0.018077674148 | -0.446737669426 |
| O  | -1.949280425206 | 3.232740646582  | 2.773283967145  |
| O  | -0.164267546514 | 1.784397272611  | 2.203695855207  |
| O  | 3.165868695649  | 4.924220353066  | 0.142775160169  |
| O  | 1.429920314187  | 6.467854318007  | -0.313199489831 |
| O  | 1.461925302677  | 8.297358581072  | 2.209684448598  |
| TV | 4.818067597014  | 0.000000000002  | 0.000000000005  |
| TV | 2.432318201301  | 9.729019044980  | -0.000000000045 |
| TV | -5.070154238489 | 0.125340713075  | 5.289173816889  |

# EQ-CO<sub>2</sub> 58

|    |                 |                 |                 |
|----|-----------------|-----------------|-----------------|
| C  | 0.587017229156  | -0.724736491051 | -0.110284948640 |
| C  | -0.850382718281 | 1.534288440925  | 2.485901203843  |
| C  | 3.932796303610  | -0.729104800975 | -0.108562756486 |
| C  | 2.492755700855  | 1.542783545286  | 2.480561528033  |
| C  | 7.300879676002  | -0.727736838068 | -0.098997722932 |
| C  | 5.851513796480  | 1.550576521926  | 2.479457312434  |
| O  | -0.582275518706 | -4.212202260707 | 2.895237088581  |
| O  | 2.755217121425  | -4.206158175368 | 2.890195359175  |
| O  | 1.120720775129  | 0.247605475792  | 0.299929990959  |
| O  | 4.459543911249  | 0.248059646877  | 0.298835224295  |
| O  | 3.405776452979  | -1.707126092516 | -0.514280248475 |
| O  | 2.019129731284  | 2.547432821032  | 2.073035813094  |
| O  | 0.053102686334  | -1.697660046279 | -0.518680764833 |
| O  | 6.112145892379  | -4.198002453582 | 2.891514337761  |
| O  | -1.330555278107 | 2.535383302715  | 2.077428256317  |
| O  | 7.849796262300  | 0.238771431260  | 0.305575419134  |
| O  | 6.752648361220  | -1.695290828634 | -0.501806492749 |
| O  | 5.380373844450  | 2.554498111628  | 2.068126933908  |
| TV | 10.083454251741 | 0.000000000009  | -0.000000000027 |
| TV | 0.210885348452  | 4.745074825432  | 0.000000000007  |
| TV | 0.266021510557  | -0.212582186861 | 5.173490407109  |

# EQ-CO<sub>2</sub> 59

|   |                |                 |                 |
|---|----------------|-----------------|-----------------|
| C | 0.703976210528 | -0.562088723273 | -0.151368565249 |
|---|----------------|-----------------|-----------------|

|    |                 |                 |                 |
|----|-----------------|-----------------|-----------------|
| C  | -1.732340043795 | 1.304511858299  | 2.542784802794  |
| C  | 0.325682282577  | 2.701046496396  | -0.156875841025 |
| C  | -2.111924628091 | 4.592488516285  | 2.545001820059  |
| C  | -0.050415504852 | 5.983780395389  | -0.167633437541 |
| C  | -2.489684663939 | 7.850929504257  | 2.549985658388  |
| O  | -0.357513894264 | -2.381639176102 | 2.027299979968  |
| O  | -0.747859691576 | 0.891417536620  | 2.033381951419  |
| O  | 1.617388387252  | -0.041631447487 | 0.390942757522  |
| O  | 1.238345069833  | 3.218523516736  | 0.389293285355  |
| O  | -0.588055127259 | 2.183895919079  | -0.701784962184 |
| O  | -3.096757374989 | 4.985452481335  | 3.069530260794  |
| O  | -0.207749635339 | -1.082816901359 | -0.695730851750 |
| O  | -1.126756063771 | 4.198625915233  | 2.021872164655  |
| O  | -2.716703820190 | 1.716958662837  | 3.053154055969  |
| O  | 0.865546976913  | 6.483629748964  | 0.389370582830  |
| O  | -0.967429205356 | 5.484045334707  | -0.722895026556 |
| O  | -3.473986666766 | 8.248036880171  | 3.072575809549  |
| TV | 4.668751031668  | 0.000000000002  | 0.000000000001  |
| TV | -1.147477960391 | 9.836618375976  | -0.000000000012 |
| TV | -4.485874739448 | 0.469847238377  | 5.414939450912  |

# EQ-CO<sub>2</sub> 60

|    |                 |                 |                 |
|----|-----------------|-----------------|-----------------|
| C  | 6.889212389403  | -1.398925585650 | 2.521922710253  |
| C  | -0.994665894856 | -2.021507464093 | -2.702749366949 |
| C  | -2.882825001607 | -2.116344952746 | 1.488049996600  |
| C  | 8.263901712941  | 1.704234235006  | 2.523158333364  |
| C  | 0.372749743993  | 1.075445160308  | -2.703158719585 |
| C  | -1.429979863775 | 0.938189976319  | 1.531609374082  |
| O  | -2.735860154942 | -2.762798512723 | 0.507768440091  |
| O  | 7.060464155098  | -2.072315211835 | 1.563186490571  |
| O  | -0.823369638625 | -2.699292843804 | -3.658483441300 |
| O  | -1.167468655339 | -1.346421041067 | -1.745249169707 |
| O  | 0.198652594720  | 1.751522089365  | -1.746187017192 |
| O  | 6.716931546305  | -0.727867892318 | 3.481764227989  |
| O  | -3.033147036989 | -1.468334033370 | 2.467606673012  |
| O  | 8.083819773039  | 2.367335954571  | 3.487283871625  |
| O  | -1.510861096727 | 1.613746384323  | 2.499970235233  |
| O  | -1.349807492698 | 0.261635874627  | 0.564217654477  |
| O  | 8.443455936577  | 1.038569445065  | 1.560652890677  |
| O  | 0.544227765435  | 0.397089457918  | -3.658155539496 |
| TV | 12.964395087432 | 0.000000000001  | 0.000000000008  |
| TV | 2.732218423672  | 6.190633106429  | -0.000000000024 |
| TV | 1.436458142440  | -0.829315704632 | 3.153351274980  |

# EQ-CO<sub>2</sub> 61

|   |                 |                 |                 |
|---|-----------------|-----------------|-----------------|
| C | 5.984349986793  | -2.309106311674 | -1.090739334529 |
| C | 1.438729107973  | -1.706820717943 | 0.299371315995  |
| C | -2.663376171463 | -0.051938662600 | 1.984659316704  |
| C | 6.060851724781  | 1.103926254725  | -1.089805395739 |
| C | 1.512523701094  | 1.712139293410  | 0.296398299638  |
| C | -2.563811507298 | 3.357160584748  | 2.045408828528  |
| O | -1.600788224141 | 0.447852594035  | 2.133422756051  |
| O | 6.894211707283  | -2.915549323905 | -1.548009313794 |
| O | 2.270429906614  | -2.286797400753 | -0.309585501077 |
| O | 0.596583265382  | -1.128692946516 | 0.901102045793  |
| O | 0.668084526922  | 2.276989480539  | 0.907321323498  |
| O | 5.086310396468  | -1.701211869436 | -0.618845577525 |

|    |                 |                 |                 |
|----|-----------------|-----------------|-----------------|
| O  | -3.726198730091 | -0.551830465185 | 1.837668757792  |
| O  | 5.162734982381  | 1.709082324399  | -0.614477463605 |
| O  | -3.615855835572 | 2.821311283660  | 1.964733619603  |
| O  | -1.513009046442 | 3.894244682600  | 2.132418170903  |
| O  | 6.970563067575  | 0.499609145884  | -1.550186770854 |
| O  | 2.346334763437  | 1.145692930592  | -0.321901401549 |
| TV | 7.418868429677  | -0.000000000030 | 0.000000000069  |
| TV | 0.153421690913  | 6.817617433707  | 0.000000000131  |
| TV | 2.256593484480  | 3.908405112670  | 4.915017002564  |

# EQ-CO<sub>2</sub> 62

|    |                 |                 |                 |
|----|-----------------|-----------------|-----------------|
| C  | 2.933384287471  | -0.988169037249 | -0.907994121502 |
| C  | 0.331858666261  | 1.723283539638  | -2.552410138658 |
| C  | 3.452633436652  | -0.968029379489 | 2.384232577027  |
| C  | 0.851192178576  | 1.743344748291  | 0.739834305114  |
| C  | 3.971871178574  | -0.947889939141 | 5.676569978634  |
| C  | 1.370245352278  | 1.763482379133  | 4.032168398798  |
| O  | -0.112286885110 | 1.105913475327  | 0.486293422651  |
| O  | 0.406749289856  | 1.126083975250  | 3.778618296952  |
| O  | 1.295653433561  | 2.360612596862  | -2.299519035871 |
| O  | 1.815028008448  | 2.380610809202  | 0.992773952935  |
| O  | 2.485666106399  | -0.335868174711 | 2.130702928530  |
| O  | -0.277722487221 | -1.599125733287 | 2.637978237050  |
| O  | 1.966406950220  | -0.356048859516 | -1.161568858738 |
| O  | 0.926001510443  | 1.146131374949  | 7.070978098459  |
| O  | -0.796919770803 | -1.619205504414 | -0.654254782713 |
| O  | 2.334087261889  | 2.400742156853  | 4.285091948056  |
| O  | 3.004915742988  | -0.315724726717 | 5.423015800568  |
| O  | 0.241488536462  | -1.579037368505 | 5.930289917572  |
| TV | 4.698019678678  | 0.000000000000  | -0.000000000000 |
| TV | 0.003588354001  | 5.432239538718  | -0.000000000000 |
| TV | 1.557601412779  | 0.060299043203  | 9.876914465112  |

# EQ-CO<sub>2</sub> 63

|    |                 |                 |                 |
|----|-----------------|-----------------|-----------------|
| C  | 7.458003932061  | -0.910331550280 | 2.523963828453  |
| C  | -0.835199134158 | -1.654759926971 | -2.512512938644 |
| C  | -2.614485572358 | -1.686355399632 | 1.531937084781  |
| C  | 9.003097036638  | -1.646223097524 | 5.554203791364  |
| C  | 0.712258082096  | -2.425562837988 | 0.401533423090  |
| C  | -1.066974559157 | -2.449690637076 | 4.442365820989  |
| O  | -2.465332632861 | -2.443869389023 | 0.634803354955  |
| O  | 7.601955840104  | -1.687167399246 | 1.640736477467  |
| O  | -0.680623777248 | -2.414134780537 | -3.407036488659 |
| O  | -0.987856082736 | -0.895167141167 | -1.616997849252 |
| O  | 0.558366163323  | -1.665302456034 | 1.296522867165  |
| O  | 7.309797158659  | -0.132736407639 | 3.404222593153  |
| O  | -2.766259617500 | -0.931913380947 | 2.431479073088  |
| O  | 8.942263920900  | -0.886279957340 | 6.459810335698  |
| O  | -1.217672576519 | -1.688361324891 | 5.335761710772  |
| O  | -0.918722271760 | -3.213922984479 | 3.550810657229  |
| O  | 9.064015802494  | -2.407359913566 | 4.649984574820  |
| O  | 0.869111449372  | -3.185119694884 | -0.492974575593 |
| TV | 13.288785767747 | -0.000000000001 | 0.000000000009  |
| TV | 1.364204077896  | 3.298757841331  | -0.000000000008 |
| TV | 3.099020847349  | -1.525696753453 | 5.835808346852  |

# EQ-CO<sub>2</sub> 64

|    |                 |                 |                 |
|----|-----------------|-----------------|-----------------|
| C  | 0.206862894171  | -0.802826511516 | -0.144900002017 |
| C  | -0.186553432472 | 1.807761290945  | 2.067569135364  |
| C  | 3.789369641362  | -0.802343535414 | -0.130813390538 |
| C  | 3.395900853028  | 1.808417925465  | 2.081725814765  |
| C  | 7.328384925924  | -0.799782287393 | -0.115194214091 |
| C  | 6.934931055850  | 1.810848144902  | 2.097206518979  |
| O  | 0.469464810960  | -3.366401927925 | 3.055755225921  |
| O  | 4.023621600508  | -3.366668538890 | 3.087342720989  |
| O  | 0.859213953302  | -0.793031566297 | 0.843239850236  |
| O  | 4.413688647940  | -0.793471917775 | 0.874596867171  |
| O  | 3.167859222897  | -0.812549191461 | -1.137998807031 |
| O  | 2.774579958986  | 1.798376675614  | 1.074437469133  |
| O  | -0.447094390812 | -0.813824168683 | -1.132105832818 |
| O  | 7.569489793911  | -3.365530079264 | 3.099204016932  |
| O  | -0.840328523265 | 1.796980387198  | 1.080257207705  |
| O  | 7.959222165955  | -0.792428747020 | 0.886774809746  |
| O  | 6.700726296194  | -0.809394012441 | -1.119369603815 |
| O  | 6.307248520577  | 1.801197687047  | 1.093061577466  |
| TV | 10.673990009303 | 0.000000000000  | -0.000000000000 |
| TV | -0.003748490357 | 5.183810941901  | -0.000000000005 |
| TV | -0.782977749541 | 0.037592294510  | 4.425028809422  |

# EQ-CO<sub>2</sub> 65

|    |                 |                 |                 |
|----|-----------------|-----------------|-----------------|
| C  | 0.923672028498  | 1.159171945571  | 3.096592461565  |
| C  | -1.839034843642 | 1.608484699464  | 0.827679643581  |
| C  | -4.211810705227 | 3.139647665404  | -1.507585515268 |
| C  | 1.027510864970  | 4.567745250548  | 3.120879915199  |
| C  | -1.783532224542 | 5.019028758281  | 0.873921228031  |
| C  | -4.105893582570 | 6.542107527831  | -1.492461639027 |
| O  | 0.747991000886  | 0.582495335800  | 2.077326052431  |
| O  | -3.844472262280 | 3.651477159047  | -2.509346350146 |
| O  | -1.955322038625 | 1.037341714886  | -0.201894910724 |
| O  | -1.282386896336 | 1.836696539265  | -2.882814268527 |
| O  | -1.176624162039 | 5.236994102552  | -2.853650265920 |
| O  | -4.578975793505 | 2.628950482515  | -0.504787137231 |
| O  | 3.452871310574  | 2.180433404552  | 1.859083988223  |
| O  | -4.484165259371 | 6.022347905444  | -0.498748090080 |
| O  | 3.564479960206  | 5.598803170268  | 1.892919422413  |
| O  | 0.851871933423  | 3.999938437784  | 2.096440012521  |
| O  | -3.726335783773 | 7.062813315343  | -2.484841207271 |
| O  | -1.960460635673 | 4.440770841001  | -0.142017582793 |
| TV | 5.182412434161  | -0.000000000001 | 0.000000000001  |
| TV | 0.205730408397  | 6.806823309151  | -0.000000000002 |
| TV | 2.389488805913  | -0.101365250768 | 6.995503812055  |

# EQ-CO<sub>2</sub> 66

|   |                 |                 |                 |
|---|-----------------|-----------------|-----------------|
| C | 0.671458004576  | 2.712968698533  | 3.175702906485  |
| C | -0.965035160151 | 0.275769295641  | 0.790352965140  |
| C | -2.474088753695 | 3.121529032863  | -1.534945591472 |
| C | 4.090512399674  | 2.706937242551  | 3.145487945640  |
| C | 2.452495439550  | 0.274370703957  | 0.794633227063  |
| C | 0.938266437395  | 3.058280549123  | -1.520817683787 |
| O | -0.448481459037 | -0.067465339811 | 1.798742630169  |
| O | -1.888301926433 | 2.954700994374  | -2.550612836197 |
| O | -1.483877219364 | 0.619309971432  | -0.216829168318 |
| O | 0.023726247844  | 0.418209927563  | -2.738108702803 |
| O | 3.450086103559  | 0.414885684299  | -2.764489645803 |

|    |                 |                 |                 |
|----|-----------------|-----------------|-----------------|
| O  | -3.059821884711 | 3.299673924920  | -0.522828186622 |
| O  | 1.261532591808  | 2.537251165167  | 2.166504457160  |
| O  | 0.351888335255  | 3.165028533001  | -0.498839602557 |
| O  | 4.675189041047  | 2.527535559526  | 2.133370718381  |
| O  | 2.964632665869  | -0.063742168717 | 1.806797747574  |
| O  | 1.525818152879  | 2.958191354836  | -2.544296715351 |
| O  | 1.938368280292  | 0.613063455960  | -0.216685594130 |
| TV | 6.836747102490  | 0.000000000006  | -0.000000000004 |
| TV | 0.034778282222  | 5.254754896791  | 0.000000000002  |
| TV | 0.056598965198  | 2.459965963362  | 6.926209523712  |

# EQ-CO<sub>2</sub> 67

|    |                 |                 |                 |
|----|-----------------|-----------------|-----------------|
| C  | -0.238827825940 | 1.480590479038  | 1.325119747208  |
| C  | -1.848830044042 | -1.321472167509 | 0.335471563249  |
| C  | -1.871810256990 | 3.743128451107  | -0.583555177099 |
| C  | -2.225199536406 | 2.072380501318  | 4.312706517859  |
| C  | -3.814189448107 | -0.756452722362 | 3.385648226199  |
| C  | -3.912076909271 | 4.339278672967  | 2.399094600178  |
| O  | -0.665590912680 | -1.358191804309 | 0.334131270734  |
| O  | -4.659767651960 | -4.179916710896 | -0.500000913316 |
| O  | -0.689927788910 | 3.759505640714  | -0.664482913755 |
| O  | 0.502073044529  | 0.865009183327  | -1.657124390026 |
| O  | -1.423366629062 | 1.447016288642  | 1.325545262209  |
| O  | -1.424382623399 | 6.625091680819  | 0.337883818705  |
| O  | 0.944017952287  | 1.515531858512  | 1.325133396708  |
| O  | -3.386064566412 | 7.217752720471  | 3.311976638954  |
| O  | -1.042528600068 | 2.123894265209  | 4.310543468894  |
| O  | -2.634553329034 | -0.822073298135 | 3.463989527269  |
| O  | -6.700635440006 | -3.591410848697 | 2.317460163450  |
| O  | -2.731517388728 | 4.363395290467  | 2.483259143022  |
| TV | 5.209485234286  | -0.000000000010 | 0.000000000001  |
| TV | 1.607858583095  | 7.906546698350  | -0.000000000002 |
| TV | -3.910506053847 | 1.154807951129  | 5.970851699255  |

# EQ-CO<sub>2</sub> 68

|    |                 |                 |                 |
|----|-----------------|-----------------|-----------------|
| C  | 0.803257146596  | 3.086789662465  | 3.017740312071  |
| C  | -2.332466514365 | 0.262764242246  | 0.780496067180  |
| C  | -2.057805066102 | 3.043072755255  | -1.412444735879 |
| C  | 4.308120055622  | 3.070519025979  | 2.967152510058  |
| C  | 1.203397195789  | 0.271622832738  | 0.797912615668  |
| C  | 1.531461528118  | 3.009547856463  | -1.470499463235 |
| O  | -1.744129397796 | 0.415475030976  | 1.797070836590  |
| O  | -2.600177429802 | 3.114492247223  | -2.463082349654 |
| O  | -2.922256578121 | 0.101616896369  | -0.233513639676 |
| O  | -1.005475814200 | 0.333490437502  | -2.526722516258 |
| O  | 2.646338004052  | 0.279802979397  | -2.660938200201 |
| O  | -1.517657056153 | 2.966512686051  | -0.360700627366 |
| O  | 0.293223668726  | 3.067367133984  | 1.949036185055  |
| O  | 2.157388195720  | 2.910528378380  | -0.470209113584 |
| O  | 3.646119787309  | 3.087250034208  | 1.985245844118  |
| O  | 1.856337579663  | 0.250460719934  | 1.786104700139  |
| O  | 0.907553611235  | 3.100154829736  | -2.473320558657 |
| O  | 0.548725098439  | 0.283924795686  | -0.188679158571 |
| TV | 7.052606227570  | -0.000000000003 | -0.000000000005 |
| TV | 3.419810682699  | 5.505377419799  | -0.000000000005 |
| TV | 2.322476180337  | 2.770830733188  | 6.611581176131  |

# EQ-CO<sub>2</sub> 69

|    |                 |                 |                 |
|----|-----------------|-----------------|-----------------|
| C  | -1.750513449172 | -0.691411222016 | 0.179516072698  |
| C  | 1.947758943952  | 1.205534044786  | 1.908654963271  |
| C  | -2.733211796756 | -0.284654446774 | 3.564075292060  |
| C  | 0.994597637298  | 1.601018808578  | 5.213782959094  |
| C  | -3.735521399719 | 0.129557309528  | 6.829937852010  |
| C  | -0.037781859939 | 2.015727720929  | 8.550229591092  |
| O  | 1.948941248945  | -1.824318182867 | 1.655341103537  |
| O  | 0.956500210649  | -1.432356927093 | 4.823364458154  |
| O  | -0.655191631272 | -0.382438174891 | -0.147683299348 |
| O  | -1.663126456299 | 0.035887170261  | 3.171758755803  |
| O  | -3.801920791173 | -0.606101886937 | 3.958112932083  |
| O  | -0.076313958272 | 1.281019835788  | 5.603114768639  |
| O  | -2.848862210226 | -0.996309917539 | 0.502457550223  |
| O  | -0.076582980605 | -1.023004558058 | 8.153778925521  |
| O  | 0.837671122722  | 0.882028053618  | 2.162864304548  |
| O  | -2.650094724215 | 0.459056393976  | 6.494091439828  |
| O  | -4.821602236076 | -0.200400421310 | 7.163353698359  |
| O  | -1.108032017714 | 1.700914396541  | 8.946817814533  |
| TV | 7.358503071075  | 0.000000000000  | -0.000000000000 |
| TV | 1.108796063196  | 3.354317956998  | -0.000000000001 |
| TV | -3.094527369424 | 1.213046526811  | 9.962056542303  |

# EQ-CO<sub>2</sub> 70

|    |                 |                 |                 |
|----|-----------------|-----------------|-----------------|
| C  | -0.091403950527 | 2.815583895642  | 3.189962857462  |
| C  | 1.579509911053  | 0.026319840471  | 0.796103081809  |
| C  | -4.689350608832 | 3.043247318091  | -1.519155216783 |
| C  | 3.261216227587  | 2.739232139889  | 3.169146041865  |
| C  | 4.934270999662  | 0.028958204278  | 0.796281461655  |
| C  | -1.329776570600 | 3.053379431923  | -1.500866771280 |
| O  | 2.118894707241  | -0.225797933658 | 1.818546445695  |
| O  | -4.144972106822 | 2.811880283716  | -0.493023187075 |
| O  | 1.040295474396  | 0.266734952357  | -0.230816974184 |
| O  | -0.267795011703 | 0.723258849666  | -2.836633058082 |
| O  | 3.089200450817  | 0.581953626853  | -2.828851108847 |
| O  | -5.234011873483 | 3.286413936785  | -2.541064674911 |
| O  | 0.393487296335  | 2.381656010738  | 2.201967800089  |
| O  | -1.872582432221 | 3.302300911215  | -2.522053493101 |
| O  | 3.743758426028  | 2.367524207378  | 2.154701870424  |
| O  | 5.473140814044  | -0.221725196459 | 1.819182608119  |
| O  | -0.786828944876 | 2.816088977852  | -0.475483259020 |
| O  | 4.395471206210  | 0.267354570135  | -0.231248666867 |
| TV | 6.709096449381  | 0.000000000004  | -0.000000000002 |
| TV | -0.097918547289 | 5.268824422728  | 0.000000000010  |
| TV | -0.309366399754 | 2.525096714440  | 7.014838225981  |

# EQ-CO<sub>2</sub> 71

|   |                 |                 |                 |
|---|-----------------|-----------------|-----------------|
| C | 0.682088798476  | 3.018823756344  | 3.005229682470  |
| C | -2.063433601066 | 0.319945701197  | 0.771654075343  |
| C | -1.927762264345 | 2.893986479716  | -1.452104315477 |
| C | 4.163643540012  | 2.954285877796  | 3.025470660762  |
| C | 1.366227633372  | 0.309102593340  | 0.772189093866  |
| C | 1.493053491622  | 2.837392965285  | -1.405046506860 |
| O | -1.480303263031 | 0.542150693475  | 1.778417904904  |
| O | -2.513934101273 | 2.674219582432  | -2.457388264990 |
| O | -2.644298370325 | 0.101432233045  | -0.236400648114 |
| O | -0.784408499903 | -0.042096298422 | -2.695787416249 |

|    |                 |                 |                 |
|----|-----------------|-----------------|-----------------|
| O  | 2.669755991680  | -0.019819519229 | -2.633279989347 |
| O  | -1.339295610135 | 3.101432696929  | -0.446327715241 |
| O  | 0.150899118703  | 3.393481185700  | 2.014929873219  |
| O  | 2.042320146266  | 2.985540926094  | -0.365875412378 |
| O  | 3.663284850735  | 3.241019636471  | 1.992175709141  |
| O  | 1.949352105434  | 0.536068293025  | 1.777251275624  |
| O  | 0.942754232093  | 2.676223186984  | -2.441487241729 |
| O  | 0.782944253956  | 0.090825204401  | -0.235159092869 |
| TV | 6.873908401071  | -0.000000000002 | 0.000000000000  |
| TV | 3.120438212215  | 5.550309404831  | 0.000000000000  |
| TV | 1.995695930531  | 2.687858702744  | 6.692571661043  |

# EQ-CO<sub>2</sub> 72

|    |                 |                 |                 |
|----|-----------------|-----------------|-----------------|
| C  | 1.592088073067  | -2.324119039672 | -0.055662390462 |
| C  | -1.817093386046 | 4.479174969210  | 2.685472193884  |
| C  | 3.225517527991  | 0.850193333531  | -0.287260708858 |
| C  | -0.217616533955 | 7.639993570203  | 2.401970701902  |
| C  | 6.093923030986  | 3.914964391681  | 0.090577066712  |
| C  | 2.196621474612  | 10.406288665442 | 2.304532651503  |
| O  | -8.044598163903 | -0.654924758714 | 2.202724260641  |
| O  | -4.027982522451 | 2.059320194693  | 3.068567775146  |
| O  | 2.551898655022  | -2.978184572642 | 0.185304918271  |
| O  | 3.664206579615  | -0.160561746995 | -0.718144073723 |
| O  | 2.786075616548  | 1.861179645222  | 0.142550908723  |
| O  | 0.725388543739  | 6.959654294722  | 2.607980822716  |
| O  | 0.643256533881  | -1.665337925559 | -0.301642267583 |
| O  | -2.260086583160 | 5.484294214995  | 3.124722063495  |
| O  | -1.371138173953 | 3.473694922787  | 2.249743877629  |
| O  | 5.442186826728  | 3.312706739063  | -0.689514161504 |
| O  | 6.745835737499  | 4.508835246001  | 0.880778301035  |
| O  | 1.547139392564  | 9.789761573835  | 1.529719235993  |
| TV | 5.445067450838  | 0.000000000001  | 0.000000000006  |
| TV | 6.873840411380  | 8.972575956143  | -0.000000000032 |
| TV | -5.068051716088 | 1.189606763629  | 5.131255137545  |

# EQ-CO<sub>2</sub> 73

|    |                 |                 |                 |
|----|-----------------|-----------------|-----------------|
| C  | 4.138385037626  | -0.328964954344 | 0.360461150739  |
| C  | 0.269137597046  | -2.064066438003 | -1.002494620439 |
| C  | -1.660969460971 | -1.563652184817 | 1.814534234863  |
| C  | 5.341356739767  | 2.975296585701  | 0.356471641702  |
| C  | 1.412265799534  | 1.253712422278  | -1.002503519195 |
| C  | -0.510919139419 | 1.753141846286  | 1.813213927669  |
| O  | -2.098371127905 | -2.056177337361 | 0.829870705160  |
| O  | 3.708978986079  | -0.811596828794 | -0.631512021861 |
| O  | -0.307230371956 | -2.488320798441 | -1.945464227057 |
| O  | 0.845260906317  | -1.640527339645 | -0.058060747570 |
| O  | 1.989288895675  | 1.681825129345  | -0.060558590436 |
| O  | 4.568325403792  | 0.153167659296  | 1.353467375237  |
| O  | -1.222886880883 | -1.071510661065 | 2.797097804433  |
| O  | 5.715636628486  | 3.470949462903  | 1.364903259412  |
| O  | -0.071395820509 | 2.250232170408  | 2.792586053710  |
| O  | -0.950619220491 | 1.256300317607  | 0.831714459605  |
| O  | 4.971729812570  | 2.477887065051  | -0.651644619156 |
| O  | 0.835300298460  | 0.825478107246  | -1.943280280948 |
| TV | 8.665205265550  | -0.000000000004 | 0.000000000008  |
| TV | 2.286905207282  | 6.627182314249  | -0.000000000010 |
| TV | 0.823829344570  | -1.104051411476 | 4.279163818135  |



# EQ-CO<sub>2</sub> 74

|    |                 |                 |                 |
|----|-----------------|-----------------|-----------------|
| C  | 1.379950724782  | 1.719191150371  | 3.117319856407  |
| C  | -1.456338880476 | 0.130792725606  | 0.868919517760  |
| C  | -3.620258455872 | 2.958937363256  | -1.499881455462 |
| C  | 1.517285925371  | 5.166509341645  | 3.117302869986  |
| C  | -1.318998017172 | 3.578121394762  | 0.868900224751  |
| C  | -3.482948912106 | 6.406281281051  | -1.499939819454 |
| O  | -1.419746651363 | -0.494319900102 | 1.872952554447  |
| O  | -3.392902260575 | 0.017877041773  | -2.504456054268 |
| O  | -1.501282726716 | 0.756469732633  | -0.135224888766 |
| O  | -0.785384368928 | 1.690195314157  | -2.939431653362 |
| O  | -0.648088440647 | 5.137490309223  | -2.939425363742 |
| O  | -3.978995262333 | 2.454066908320  | -0.490870269312 |
| O  | 1.114117708029  | 1.134023409850  | 2.123240943586  |
| O  | -3.841688238993 | 5.901498760899  | -0.490882916009 |
| O  | 1.251487008645  | 4.581356192821  | 2.123193200311  |
| O  | -1.282447013257 | 2.952945552689  | 1.872892950344  |
| O  | -3.255556115519 | 3.465307954327  | -2.504354376102 |
| O  | -1.363829327898 | 4.203878389219  | -0.135197384789 |
| TV | 5.085150562603  | -0.000000000009 | 0.000000000001  |
| TV | 0.274647228764  | 6.894711640489  | -0.000000000001 |
| TV | 2.437840910450  | 0.613128771824  | 7.048628258321  |

# EQ-CO<sub>2</sub> 75

|    |                 |                |                 |
|----|-----------------|----------------|-----------------|
| C  | 0.667019179887  | 3.144888139388 | 2.978214777129  |
| C  | -1.301716582391 | 0.144053216979 | 0.759153213205  |
| C  | -3.098460151391 | 3.076041356482 | -1.463098913761 |
| C  | 4.143534982251  | 3.069257547509 | 2.979408219271  |
| C  | 2.181873903771  | 0.227217077318 | 0.774232627621  |
| C  | 0.299546893194  | 3.055884693543 | -1.346913778826 |
| O  | -0.655046335838 | 0.175618867516 | 1.749990779707  |
| O  | -2.487471624511 | 3.307141509702 | -2.451115986229 |
| O  | -1.949300474190 | 0.100676153527 | -0.231182575315 |
| O  | -0.528851491893 | 0.702191235599 | -2.718704907751 |
| O  | 2.964846439835  | 0.560190450302 | -2.694951289414 |
| O  | -3.706633507484 | 2.843190028929 | -0.475528727943 |
| O  | 1.309872696448  | 2.947512559982 | 2.004119856296  |
| O  | -0.291699971461 | 2.739643558435 | -0.370745860193 |
| O  | 4.770655227509  | 2.935697125809 | 1.984986779850  |
| O  | 2.821460744442  | 0.333927435367 | 1.765205273028  |
| O  | 0.887852885154  | 3.370898294272 | -2.324356563253 |
| O  | 1.542580945657  | 0.112162546544 | -0.215574053056 |
| TV | 6.950618078564  | 0.000000000006 | 0.000000000000  |
| TV | 0.129868022421  | 5.363762831350 | 0.000000000003  |
| TV | 0.553652662352  | 2.642491568813 | 6.671373528918  |

# EQ-CO<sub>2</sub> 76

|   |                 |                 |                 |
|---|-----------------|-----------------|-----------------|
| C | 1.185804115528  | 2.716071385949  | 3.120000062603  |
| C | -1.390775236944 | 1.026118678743  | 0.789975579956  |
| C | -4.024879646927 | 2.689407532018  | -1.489119193392 |
| C | 1.148369243438  | 6.236440575225  | 3.119849421251  |
| C | -1.428288759481 | 4.546431314327  | 0.790159137722  |
| C | -4.062747066574 | 6.207723774892  | -1.492226300115 |
| O | -1.206092306557 | 0.424116496283  | 1.791848281840  |
| O | -3.923544128635 | -1.465706716053 | -2.491138604597 |
| O | -1.575600620335 | 1.633063302112  | -0.209346744503 |

|    |                 |                 |                 |
|----|-----------------|-----------------|-----------------|
| O  | -1.414921550534 | 0.191190463671  | -2.762325376685 |
| O  | -1.452373870849 | 3.711309111617  | -2.762349893946 |
| O  | -4.093944511893 | 3.321195088625  | -0.491387406472 |
| O  | 1.266656175927  | 2.132620015640  | 2.094299154736  |
| O  | -4.131055197236 | 6.839231672140  | -0.494368803858 |
| O  | 1.229170012050  | 5.653230169981  | 2.093996006497  |
| O  | -1.243924759649 | 3.945363370639  | 1.792669274015  |
| O  | -3.960321184197 | 2.055941978893  | -2.487682856668 |
| O  | -1.612938772120 | 5.152517300815  | -0.209712868141 |
| TV | 5.055080959621  | -0.000000000005 | -0.000000000004 |
| TV | -0.075195323023 | 7.040473947102  | -0.000000000000 |
| TV | 2.522327890736  | 3.107195160142  | 6.910418582002  |

# EQ-CO<sub>2</sub> 77

|    |                 |                 |                 |
|----|-----------------|-----------------|-----------------|
| C  | 0.326233371965  | 3.724954467242  | 2.362664284346  |
| C  | -1.285334764360 | 0.499508394371  | 0.617980696792  |
| C  | -3.019089525134 | 2.567213536402  | -1.108631833254 |
| C  | 4.052978937662  | 3.726138694666  | 2.361886995670  |
| C  | 2.442500875725  | 0.499906891638  | 0.617555958959  |
| C  | 0.707928028169  | 2.565673328222  | -1.110190511499 |
| O  | -0.573774306605 | 1.149636372803  | 1.305833274330  |
| O  | -3.731693093205 | 1.915648769450  | -1.794287920112 |
| O  | -2.004199243018 | -0.128871156918 | -0.080031713267 |
| O  | -0.190685625854 | -1.342012914348 | -2.234860510942 |
| O  | 3.536114729539  | -1.340425348434 | -2.235367951193 |
| O  | -2.299127434016 | 3.196795114229  | -0.412527930361 |
| O  | -0.396509719164 | 4.416120864454  | 1.731353181660  |
| O  | 1.427397474749  | 3.196367744470  | -0.414553692813 |
| O  | 3.330282171476  | 4.416962506423  | 1.730161539151  |
| O  | 3.154071161236  | 1.150073135918  | 1.305373436328  |
| O  | -0.004282032528 | 1.912934049827  | -1.795266622616 |
| O  | 1.723607075475  | -0.128508808285 | -0.080394924186 |
| TV | 7.455968956012  | 0.000000000000  | -0.000000000001 |
| TV | -0.112187618709 | 6.347875131093  | -0.000000000007 |
| TV | 1.239856349396  | 4.375823838715  | 5.228637786000  |

# EQ-CO<sub>2</sub> 78

|    |                 |                 |                 |
|----|-----------------|-----------------|-----------------|
| C  | 0.441790512816  | 2.327375038731  | 3.255085612032  |
| C  | -0.874525447107 | 0.135189076776  | 0.809474801714  |
| C  | -2.200416422442 | 3.038719595021  | -1.583271763261 |
| C  | 3.869203392533  | 2.315100880272  | 3.167837426709  |
| C  | 2.533785219866  | 0.129204231989  | 0.809104288823  |
| C  | 1.204799689559  | 2.986190994125  | -1.541689133455 |
| O  | -0.533786133090 | -0.343892928764 | 1.836558896949  |
| O  | -1.628748903997 | 2.849049048410  | -2.602402488194 |
| O  | -1.215637132026 | 0.617299144906  | -0.215871343342 |
| O  | 0.162361706628  | 0.370902523610  | -2.738258399490 |
| O  | 3.595550181341  | 0.360121606555  | -2.822420271651 |
| O  | -2.771123998084 | 3.240771090978  | -0.567709996467 |
| O  | 1.011083119547  | 2.205709942979  | 2.225964254180  |
| O  | 0.644820136298  | 3.125107301170  | -0.508847640023 |
| O  | 4.433638258590  | 2.188211896357  | 2.135870760376  |
| O  | 2.865789714531  | -0.344070057380 | 1.841551557562  |
| O  | 1.766429717364  | 2.856012458005  | -2.576170036543 |
| O  | 2.201712970058  | 0.606264070062  | -0.221667655357 |
| TV | 6.829152986891  | 0.000000000006  | -0.000000000004 |
| TV | 0.004350014697  | 5.156249122981  | 0.000000000001  |

|                         |                 |                 |                 |
|-------------------------|-----------------|-----------------|-----------------|
| TV                      | -0.293431625737 | 2.071326440086  | 7.023068622617  |
| # EQ-CO <sub>2</sub> 79 |                 |                 |                 |
| C                       | 1.710226537566  | 1.999430412563  | 3.146756906557  |
| C                       | -0.648788579345 | 0.392639202456  | 0.793187725473  |
| C                       | -3.293735661242 | 2.137113032548  | -1.478572680068 |
| C                       | 1.625292610761  | 5.486685410794  | 3.146692952585  |
| C                       | -0.733692681772 | 3.879771039869  | 0.793149871861  |
| C                       | -3.378734165174 | 5.624408912649  | -1.478632524086 |
| O                       | -0.539674513134 | -0.190586551966 | 1.817103561453  |
| O                       | -3.321244275867 | 1.506361963237  | -2.480018065848 |
| O                       | -0.756589971297 | 0.976794226618  | -0.230354292748 |
| O                       | -0.759904985469 | -0.234220953309 | -2.848710767627 |
| O                       | -0.844922483773 | 3.253001681422  | -2.848759939477 |
| O                       | -3.269421132057 | 2.768317416405  | -0.478126171857 |
| O                       | 1.965828139661  | 1.489125241739  | 2.110496241056  |
| O                       | -3.354421288564 | 6.255593171877  | -0.478181476462 |
| O                       | 1.880931755269  | 4.976408261216  | 2.110419559879  |
| O                       | -0.624567514903 | 3.296599143074  | 1.817089161853  |
| O                       | -3.406189959237 | 4.993543757103  | -2.479998917659 |
| O                       | -0.841446142307 | 4.463918654997  | -0.230402274525 |
| TV                      | 5.019734301183  | -0.000000000006 | -0.000000000004 |
| TV                      | -0.170214719134 | 6.974467379359  | -0.000000000002 |
| TV                      | 2.218129731984  | 2.744397220342  | 7.033383452200  |

|                         |                 |                 |                 |
|-------------------------|-----------------|-----------------|-----------------|
| # EQ-CO <sub>2</sub> 80 |                 |                 |                 |
| C                       | 0.898982731515  | 0.587797316244  | 3.112279886548  |
| C                       | -1.980644988783 | 1.209460378828  | 0.843839129783  |
| C                       | -4.150689275345 | 2.547376931918  | -1.485994833436 |
| C                       | 1.095377545530  | 3.992460429474  | 3.112514887248  |
| C                       | -1.784349078832 | 4.614336593483  | 0.843723948629  |
| C                       | -3.954521440278 | 5.952330775082  | -1.483790430440 |
| O                       | 0.549915585230  | 0.072538002439  | 2.104736047265  |
| O                       | -3.588370649239 | 2.920447447352  | -2.457524127785 |
| O                       | -2.106485947467 | 0.631217514899  | -0.180879028204 |
| O                       | -1.102259048587 | 1.091523082177  | -2.916537411742 |
| O                       | -0.905957145893 | 4.496632054271  | -2.916507698122 |
| O                       | -4.709955911166 | 2.175694074958  | -0.511374604982 |
| O                       | 3.323479880928  | 1.788137555193  | 1.871331304715  |
| O                       | -4.513996211731 | 5.580602457632  | -0.509255313745 |
| O                       | 3.520021342840  | 5.192887863245  | 1.871240068022  |
| O                       | 0.746643659189  | 3.477024829229  | 2.104958017035  |
| O                       | -3.391594581974 | 6.325238833790  | -2.455041602619 |
| O                       | -1.910196878688 | 4.036129491723  | -0.181022481156 |
| TV                      | 5.194061319757  | -0.000000000001 | -0.000000000000 |
| TV                      | 0.392814052462  | 6.809753600176  | -0.000000000000 |
| TV                      | 2.361932650884  | 0.010382754101  | 7.030684226102  |

|                         |                 |                 |                 |
|-------------------------|-----------------|-----------------|-----------------|
| # EQ-CO <sub>2</sub> 81 |                 |                 |                 |
| C                       | 0.471141600017  | 0.123696768664  | -0.193064962084 |
| C                       | -0.557721418426 | 2.354548892056  | 2.571763845765  |
| C                       | 3.776578789255  | 0.123678263621  | -0.193040227793 |
| C                       | 2.747187096252  | 2.354567179177  | 2.572044586259  |
| C                       | 7.081906150157  | 0.123719935884  | -0.192993562096 |
| C                       | 6.052480751375  | 2.354596593012  | 2.572026077983  |
| O                       | -1.306637336216 | -5.922250547744 | 3.135586407883  |
| O                       | 1.998319124180  | -5.922306654002 | 3.135969436895  |

|    |                 |                 |                 |
|----|-----------------|-----------------|-----------------|
| O  | 0.954096352936  | -0.748362212743 | 0.443776218424  |
| O  | 4.259561499538  | -0.748354099301 | 0.443809993783  |
| O  | 3.294421973505  | 0.999060500587  | -0.826618471550 |
| O  | 2.314565970083  | 1.408747673820  | 2.008911635234  |
| O  | -0.010940597407 | 0.999076031575  | -0.826706621224 |
| O  | 5.303643378866  | -5.922293874097 | 3.135946180113  |
| O  | -0.990509892329 | 1.408713130700  | 2.008793599958  |
| O  | 7.564891835064  | -0.748301457346 | 0.443869812528  |
| O  | 6.599771740086  | 0.999094065721  | -0.826592155591 |
| O  | 5.619866703024  | 1.408746564217  | 2.008939381304  |
| TV | 9.916163036205  | 0.000000000003  | 0.000000000013  |
| TV | 0.591103632761  | 4.610904388933  | -0.000000000033 |
| TV | -2.652558063292 | -0.093473018192 | 5.553208223415  |

# EQ-CO<sub>2</sub> 82

|    |                 |                 |                 |
|----|-----------------|-----------------|-----------------|
| C  | 0.784100078374  | 3.149569795968  | 2.993792826720  |
| C  | -1.316100568280 | 0.379186591049  | 0.823786561074  |
| C  | -3.077182468568 | 2.986966465744  | -1.469843963762 |
| C  | 4.293016149344  | 3.222865141510  | 2.990089457721  |
| C  | 2.184321269605  | 0.375502619256  | 0.822561656941  |
| C  | 0.427595509964  | 2.981544130945  | -1.473834826427 |
| O  | -0.681401526116 | 0.282028483489  | 1.819145464840  |
| O  | -2.451978058858 | 2.905196774738  | -2.472354544181 |
| O  | -1.953088298574 | 0.475100093378  | -0.169857246977 |
| O  | -0.344067543365 | 0.271452040875  | -2.649866410636 |
| O  | 3.160898541270  | 0.270510964344  | -2.653153328313 |
| O  | -3.706086236567 | 3.068141391057  | -0.470880800507 |
| O  | 1.408080760593  | 3.070095849448  | 1.991149037364  |
| O  | -0.201133659257 | 3.065295590520  | -0.474978827810 |
| O  | 4.920881130797  | 3.219305272482  | 1.986625387804  |
| O  | 2.816186447147  | 0.276565946962  | 1.819307709776  |
| O  | 1.052569334759  | 2.899251312918  | -2.476460397696 |
| O  | 1.550306341532  | 0.472528835229  | -0.172806613844 |
| TV | 7.006777281404  | -0.000000000012 | -0.000000000006 |
| TV | 0.358740809629  | 5.440748570926  | -0.000000000006 |
| TV | 0.503949417069  | 2.952055224658  | 6.647330242919  |

# EQ-CO<sub>2</sub> 83

|    |                 |                 |                 |
|----|-----------------|-----------------|-----------------|
| C  | 1.112578667659  | -1.555890198234 | -0.392415439713 |
| C  | -1.129143017743 | 0.903024692262  | 2.414768913071  |
| C  | 4.527275918825  | -1.555881117081 | -0.392428942669 |
| C  | 2.285544980998  | 0.903022334232  | 2.414746686401  |
| C  | 7.941905169933  | -1.555865327145 | -0.392416964474 |
| C  | 5.700237591292  | 0.903048649308  | 2.414788593145  |
| O  | -0.550418819057 | 0.024626296634  | 2.956284315415  |
| O  | 2.864275592562  | 0.024629923229  | 2.956272595363  |
| O  | 0.619290929109  | -2.555857632868 | -0.789855646696 |
| O  | 4.033999916986  | -2.555861256185 | -0.789856901886 |
| O  | 5.018810139912  | -0.554487783266 | 0.005118368322  |
| O  | 1.706059130135  | 1.780394543624  | 1.873320139490  |
| O  | 1.604110259996  | -0.554497575145 | 0.005126689093  |
| O  | 6.278956466122  | 0.024643241070  | 2.956302360993  |
| O  | -1.708621140972 | 1.780399158911  | 1.873338258036  |
| O  | 7.448656299452  | -2.555848040833 | -0.789864872758 |
| O  | 8.433417113296  | -0.554478946760 | 0.005169846921  |
| O  | 5.120763575183  | 1.780414172374  | 1.873339424673  |
| TV | 10.244058156768 | -0.000000000011 | -0.000000000011 |

|    |                 |                |                 |
|----|-----------------|----------------|-----------------|
| TV | -0.856299399818 | 4.517827825677 | -0.000000000081 |
| TV | -3.643756215931 | 0.490812300102 | 5.616983608381  |

# EQ-CO<sub>2</sub> 84

|    |                 |                 |                 |
|----|-----------------|-----------------|-----------------|
| C  | 1.856473124026  | 2.628444760781  | 3.168525042710  |
| C  | -0.781855651321 | 0.865909441685  | 0.801505949343  |
| C  | -3.600970826405 | 2.475868179146  | -1.530256386474 |
| C  | 1.746507884894  | 6.032427940364  | 3.169597987559  |
| C  | -0.891959537555 | 4.269632764716  | 0.801476358069  |
| C  | -3.710915975184 | 5.879428415443  | -1.530272962888 |
| O  | -0.412742059230 | 0.326765900725  | 1.788278337829  |
| O  | -3.445179265679 | 1.916209603600  | -2.562700550300 |
| O  | -1.149278955195 | 1.405196898794  | -0.186127378303 |
| O  | -0.845191805146 | 0.099146520049  | -2.794857570511 |
| O  | -0.955447997871 | 3.503565902747  | -2.794142541888 |
| O  | -3.765773933439 | 3.035412115399  | -0.500762852564 |
| O  | 2.115524618591  | 2.056035201535  | 2.166354069143  |
| O  | -3.875687982016 | 6.438856603605  | -0.500701646922 |
| O  | 2.005991012668  | 5.459441106060  | 2.167945335246  |
| O  | -0.522767835759 | 3.730388265009  | 1.788164602335  |
| O  | -3.555193641933 | 5.319847075975  | -2.562768115900 |
| O  | -1.259426684268 | 4.808956679186  | -0.186118806101 |
| TV | 5.219835474954  | -0.000000000006 | -0.000000000003 |
| TV | -0.219933470026 | 6.807059932299  | -0.000000000000 |
| TV | 2.453967674767  | 3.099940134121  | 6.971468694172  |

# EQ-CO<sub>2</sub> 85

|    |                 |                 |                 |
|----|-----------------|-----------------|-----------------|
| C  | 1.119384218721  | -1.569405052963 | -0.391130592336 |
| C  | -1.057251671141 | 0.969166172756  | 2.507927363760  |
| C  | 4.504733563787  | -1.593857195367 | -0.325249269586 |
| C  | 2.297450539010  | 0.966661974481  | 2.506897501798  |
| C  | 7.828522791148  | -1.541443516438 | -0.392551697407 |
| C  | 5.682784400990  | 0.845717421222  | 2.511658497503  |
| O  | -0.509022320882 | 0.088578828921  | 3.076900720386  |
| O  | 2.837732004623  | 0.082770352486  | 3.077371389331  |
| O  | 0.628209152443  | -2.562975176943 | -0.806387439571 |
| O  | 3.984724082212  | -2.541679798959 | -0.807580009541 |
| O  | 5.026684971911  | -0.646493243099 | 0.155710254879  |
| O  | 1.759670354737  | 1.854373720858  | 1.937952664062  |
| O  | 1.607626859790  | -0.572124717135 | 0.018758488298  |
| O  | 6.228710554263  | -0.038256575873 | 3.077213954168  |
| O  | -1.603251118966 | 1.852900745457  | 1.940444197694  |
| O  | 7.345820037745  | -2.540771566349 | -0.806184402936 |
| O  | 8.307354103490  | -0.538084403340 | 0.014431477014  |
| O  | 5.139772085264  | 1.729260288207  | 1.943040253076  |
| TV | 10.070187057266 | -0.000000000012 | -0.000000000009 |
| TV | -0.834329194843 | 4.511214893769  | -0.000000000077 |
| TV | -3.825806809533 | 0.370363977610  | 5.824057612494  |

# EQ-CO<sub>2</sub> 86

|   |                 |                |                 |
|---|-----------------|----------------|-----------------|
| C | -1.660881918084 | 0.575681722062 | -0.747293409028 |
| C | -2.750611300731 | 3.042389277746 | 2.242597344532  |
| C | -0.141660840586 | 0.490107512817 | 2.241406457539  |
| C | -1.393490516064 | 2.807636066834 | 5.308434927653  |
| C | 1.209055783412  | 0.265016023013 | 5.311949914527  |
| C | 0.187299371250  | 2.847257241485 | 8.231754621412  |
| O | -2.696880566062 | 0.063382042055 | -0.496863054353 |

|    |                 |                 |                 |
|----|-----------------|-----------------|-----------------|
| O  | -1.173618398266 | -0.029010777125 | 2.497195681673  |
| O  | 0.326938090440  | -1.499794289829 | 0.187310446658  |
| O  | 1.842700570103  | -1.624235636015 | 3.153878193295  |
| O  | -0.733856921431 | 2.330012671207  | 4.450918590700  |
| O  | 2.207770776845  | 0.809226662964  | 4.984720463779  |
| O  | -2.135063288933 | 2.600734238113  | 1.332691011923  |
| O  | 0.210561789652  | -0.276670288480 | 5.640745417383  |
| O  | 0.890136653291  | 1.008941614992  | 1.986424216851  |
| O  | 3.152715429929  | -1.823955731328 | 6.166908695265  |
| O  | 0.738414546948  | 2.362612245996  | 7.305308929105  |
| O  | 3.889242758424  | 0.806747349541  | 7.971220999562  |
| TV | 5.599219128800  | 0.000000000001  | -0.000000000001 |
| TV | 0.393584335171  | 5.108779133053  | 0.000000000002  |
| TV | 4.512294595429  | -0.278268363995 | 8.970786433688  |

# EQ-CO<sub>2</sub> 87

|    |                 |                 |                 |
|----|-----------------|-----------------|-----------------|
| C  | 1.308658684128  | 1.953985213237  | 3.163196731210  |
| C  | -1.562400954792 | 0.287197930915  | 0.882846858213  |
| C  | -3.560512715059 | 2.856266846168  | -1.545219198760 |
| C  | 1.469584654056  | 5.408402222439  | 3.156990486314  |
| C  | -1.398930900985 | 3.744189261462  | 0.882681770260  |
| C  | -3.396516871977 | 6.312983639510  | -1.547331267264 |
| O  | -1.480243350959 | -0.335936464093 | 1.885516617775  |
| O  | -3.174054159305 | -0.308530812914 | -2.553539504070 |
| O  | -1.655557883033 | 0.909410996479  | -0.119435987648 |
| O  | -0.626275686302 | 1.340629432398  | -2.898553536976 |
| O  | -0.465039622066 | 4.796174842156  | -2.905565285462 |
| O  | -4.103121313266 | 2.565049528446  | -0.534623926542 |
| O  | 1.059348294767  | 1.407229650261  | 2.143599427533  |
| O  | -3.940178859654 | 6.021372702988  | -0.537393218043 |
| O  | 1.220516072349  | 4.860221279748  | 2.138059547163  |
| O  | -1.317011240497 | 3.121002950373  | 1.885342322638  |
| O  | -3.012158242041 | 3.148514966702  | -2.551932341043 |
| O  | -1.491915776602 | 4.366501750341  | -0.119581558963 |
| TV | 5.065365731842  | -0.000000000008 | -0.000000000003 |
| TV | 0.326719485325  | 6.914133785467  | -0.000000000000 |
| TV | 2.190968795574  | 1.158222732295  | 7.080448078031  |

# EQ-CO<sub>2</sub> 88

|   |                 |                 |                 |
|---|-----------------|-----------------|-----------------|
| C | -1.453618110320 | 0.670693794976  | -0.663377610060 |
| C | -2.421486905213 | 3.418959271198  | 2.306259446858  |
| C | 0.092841438666  | 0.682150928575  | 2.238310410495  |
| C | -0.977987438732 | 3.379073758353  | 5.276916121573  |
| C | 1.543874440043  | 0.663331800481  | 5.274762952798  |
| C | 0.595815673873  | 3.486669922581  | 8.238099136532  |
| O | -2.464944385348 | 0.057774247651  | -0.647382414216 |
| O | -0.971522032533 | 0.173634464263  | 2.328380867201  |
| O | 0.491562212955  | -1.430138838693 | 0.187802832197  |
| O | 1.861573577080  | -1.543188205410 | 3.155567218666  |
| O | -0.373073572466 | 2.830546067427  | 4.421038252052  |
| O | 2.586276463426  | 1.221469102651  | 5.258441428204  |
| O | -1.746153136920 | 2.945012679653  | 1.458000639794  |
| O | 0.501316843924  | 0.105450779990  | 5.289197207467  |
| O | 1.158745628897  | 1.187851736256  | 2.143324757139  |
| O | 3.371269873467  | -1.508310091351 | 6.130426316481  |
| O | 1.131944429265  | 2.866915446262  | 7.385572673230  |
| O | 4.086704631487  | 1.384421162277  | 8.225819499250  |

|    |                |                 |                 |
|----|----------------|-----------------|-----------------|
| TV | 5.370023673118 | -0.000000000000 | -0.000000000001 |
| TV | 0.411299754894 | 5.435359615436  | 0.000000000001  |
| TV | 4.528094902761 | 0.101410689179  | 8.903380068938  |

# EQ-CO<sub>2</sub> 89

|    |                 |                 |                 |
|----|-----------------|-----------------|-----------------|
| C  | 1.513706289303  | 3.527438180034  | 3.147765269026  |
| C  | -1.404700871201 | 0.649354270616  | 0.872430749429  |
| C  | -3.869711987982 | 2.282186608105  | -1.559725522793 |
| C  | 1.589948096929  | 6.924812912156  | 3.149727863482  |
| C  | -1.331238595645 | 4.042124314268  | 0.871518890220  |
| C  | -3.800219004896 | 5.671856422859  | -1.529623554119 |
| O  | -1.077885373251 | 1.183381230884  | 1.877421080909  |
| O  | -3.452381428131 | 2.767711781863  | -2.555847438998 |
| O  | -1.742172165530 | 0.115789616909  | -0.127126021129 |
| O  | -0.962797815066 | 0.955228791390  | -2.841171694646 |
| O  | -0.885600364415 | 4.352351959118  | -2.839117355543 |
| O  | -4.290411066251 | 1.797809329075  | -0.565501632817 |
| O  | 1.490501497581  | 2.959759966415  | 2.108445542040  |
| O  | -4.215466841266 | 5.187383405788  | -0.532893062446 |
| O  | 1.566147242239  | 6.357053102161  | 2.110568411015  |
| O  | -1.004450531433 | 4.575601974810  | 1.876788055992  |
| O  | -3.387264415881 | 6.157617311472  | -2.527223512632 |
| O  | -1.668397215045 | 3.509155795516  | -0.128467621362 |
| TV | 5.199238885959  | -0.000000000006 | -0.000000000003 |
| TV | 0.150128724733  | 6.789776160721  | 0.000000000002  |
| TV | 2.508818540327  | 3.138355997873  | 7.027516672404  |

# EQ-CO<sub>2</sub> 90

|    |                 |                 |                 |
|----|-----------------|-----------------|-----------------|
| C  | 1.084032833222  | 2.520127889877  | 3.161435503536  |
| C  | -1.265448769076 | 0.391494501835  | 0.801562629856  |
| C  | -2.953129829506 | 2.729044803874  | -1.482519345607 |
| C  | 4.578001021703  | 2.520252304739  | 3.161465080316  |
| C  | 2.228117933517  | 0.391643797774  | 0.801080999553  |
| C  | 0.543216465878  | 2.729252412986  | -1.485478412562 |
| O  | -0.669703620072 | 0.507827409332  | 1.817921641583  |
| O  | -2.327078756173 | 2.556681733362  | -2.471922365581 |
| O  | -1.865010800844 | 0.282516819976  | -0.212810788233 |
| O  | -0.583225145418 | 0.055198203537  | -2.862602023170 |
| O  | 2.910737736099  | 0.055400642980  | -2.862529142016 |
| O  | -3.580103529268 | 2.894169390818  | -0.492852929519 |
| O  | 1.173031024153  | 3.094547620032  | 2.130375208630  |
| O  | -0.080699608172 | 2.894634818038  | -0.493980178330 |
| O  | 4.667047800555  | 3.094599061818  | 2.130360275938  |
| O  | 2.823946888849  | 0.507785753883  | 1.817416582280  |
| O  | 1.165975457549  | 2.556386021503  | -2.476904355750 |
| O  | 1.628580228510  | 0.282800840501  | -0.213322623976 |
| TV | 6.987359788264  | -0.000000000002 | -0.000000000000 |
| TV | 0.059711578022  | 5.063620703772  | -0.000000000000 |
| TV | 1.580748692931  | 1.892219014405  | 7.056071186542  |

# EQ-CO<sub>2</sub> 91

|   |                 |                 |                |
|---|-----------------|-----------------|----------------|
| C | -1.879913711117 | -0.618494968234 | 0.479670837515 |
| C | 0.940847498206  | 1.129743641291  | 2.094261331424 |
| C | -3.487737454307 | -0.722442654907 | 3.706058490722 |
| C | -0.667060260181 | 1.025695422896  | 5.320920547706 |
| C | -5.095692685512 | -0.826577168697 | 6.932975868183 |
| C | -2.275031755076 | 0.921666241692  | 8.547548062401 |

|    |                 |                 |                 |
|----|-----------------|-----------------|-----------------|
| O  | 1.825278349519  | -1.777843295765 | 1.778902359316  |
| O  | 0.217360937730  | -1.881884392037 | 5.005559819161  |
| O  | -0.973493865282 | -1.304284068276 | 0.150365684170  |
| O  | -2.581353557958 | -1.408309198969 | 3.376829481708  |
| O  | -4.392933850185 | -0.035936390990 | 4.037043119351  |
| O  | -1.572500868504 | 0.332706844844  | 5.637149595101  |
| O  | -2.785106722153 | 0.068031681187  | 0.810598768536  |
| O  | -1.390625941888 | -1.985875088373 | 8.232231971875  |
| O  | 0.035427829844  | 0.436723060122  | 2.410497943547  |
| O  | -4.189302064968 | -1.512408578938 | 6.603665880808  |
| O  | -6.000895330430 | -0.140064085923 | 7.263915858393  |
| O  | -3.180500934509 | 0.228701953820  | 8.863725159019  |
| TV | 7.228835027519  | -0.000000000007 | 0.000000000005  |
| TV | 0.021466675622  | 3.600453960563  | -0.000000000005 |
| TV | -4.823782880051 | -0.312079049489 | 9.679956094644  |

# EQ-CO<sub>2</sub> 92

|    |                 |                 |                 |
|----|-----------------|-----------------|-----------------|
| C  | 1.312089155891  | 2.637221604551  | 3.230655235537  |
| C  | -1.319189596051 | 0.471463538633  | 0.814776152976  |
| C  | -2.867923428727 | 3.212775066439  | -1.570509985032 |
| C  | 4.821994632423  | 2.637429827883  | 3.230207456460  |
| C  | 2.190917286052  | 0.470876572370  | 0.814990304231  |
| C  | 0.642806514747  | 3.202873830779  | -1.570244837109 |
| O  | -0.931387440970 | 0.047318373968  | 1.849673541418  |
| O  | -2.087642610089 | -1.930866362318 | -2.574109459114 |
| O  | -1.706476436616 | 0.899677214878  | -0.217796844591 |
| O  | -0.479433145119 | 0.625822329590  | -2.839993012267 |
| O  | 3.030483646416  | 0.626125496551  | -2.840480845546 |
| O  | -3.474821109193 | 3.366584298111  | -0.566381621304 |
| O  | 0.693517949640  | 2.547017949722  | 2.225500401378  |
| O  | 0.033943553572  | 3.349793196724  | -0.566306462676 |
| O  | 4.203378346615  | 2.547277163617  | 2.225063200278  |
| O  | 2.578408921915  | 0.047857207934  | 1.850428950180  |
| O  | 1.424400659476  | -1.932771947721 | -2.574183992157 |
| O  | 1.803831667870  | 0.897881549356  | -0.218149312154 |
| TV | 7.020087933510  | -0.000000000016 | -0.000000000006 |
| TV | -0.170810861939 | 4.994727643234  | 0.000000000000  |
| TV | 2.410247951474  | 2.095343957906  | 7.075489581361  |

# EQ-CO<sub>2</sub> 93

|   |                 |                 |                 |
|---|-----------------|-----------------|-----------------|
| C | 1.363119298313  | 2.284066077065  | 3.107963692948  |
| C | -1.336157780150 | 0.502233552244  | 0.887116356525  |
| C | -3.457890585734 | 2.778199087434  | -1.534747955116 |
| C | 1.358490251006  | 5.806370446974  | 3.130380085619  |
| C | -1.345730574856 | 4.016535585659  | 0.888771645501  |
| C | -3.468198183403 | 6.291234568722  | -1.536477142660 |
| O | -1.167670109441 | -0.119073121482 | 1.879672106568  |
| O | -2.890739330726 | -0.945115460493 | -2.558398004028 |
| O | -1.514421062836 | 1.121604457329  | -0.104815139682 |
| O | -0.452851402662 | 0.852135886987  | -2.949121062387 |
| O | -0.453232832901 | 4.366385967704  | -2.922156236479 |
| O | -4.015135974653 | 2.992475610909  | -0.513394390717 |
| O | 1.254841386951  | 1.668921303232  | 2.102618015742  |
| O | -4.026094154416 | 6.504739721505  | -0.515314858985 |
| O | 1.246244625699  | 5.200513390008  | 2.120107780086  |
| O | -1.176086560645 | 3.393322155956  | 1.880004071803  |
| O | -2.900394177600 | 2.566014401175  | -2.557068389985 |



|    |                 |                 |                 |
|----|-----------------|-----------------|-----------------|
| O  | -1.525220789522 | 4.637278240488  | -0.102001704318 |
| TV | 5.025000619953  | -0.000000000007 | -0.000000000003 |
| TV | -0.019089925387 | 7.024689734383  | -0.000000000000 |
| TV | 1.930544310694  | 2.043762894049  | 7.063692166616  |

# EQ-CO<sub>2</sub> 94

|    |                 |                |                 |
|----|-----------------|----------------|-----------------|
| C  | 1.560468600093  | 2.580847285078 | 3.146721199664  |
| C  | -1.197277348391 | 0.756590604261 | 0.853930789952  |
| C  | -3.852724580008 | 2.531573337125 | -1.524229529951 |
| C  | 1.408981182151  | 5.954167032354 | 3.145933890788  |
| C  | -1.351676556651 | 4.132574772225 | 0.859108612757  |
| C  | -3.992124758400 | 5.884776178407 | -1.564942969722 |
| O  | -0.778125794130 | 0.230097693512 | 1.827510688251  |
| O  | -3.435260346161 | 2.059224097474 | -2.526628614396 |
| O  | -1.622777850930 | 1.283269911717 | -0.116014389627 |
| O  | -0.822737008858 | 0.395530108339 | -2.842478682710 |
| O  | -0.972515882619 | 3.764760712116 | -2.840854360513 |
| O  | -4.279229047002 | 3.004542756419 | -0.527394553995 |
| O  | 1.668191534070  | 2.010204614651 | 2.115761014749  |
| O  | -4.421943448858 | 6.354820742106 | -0.568495208402 |
| O  | 1.514422900714  | 5.388103621793 | 2.112101391869  |
| O  | -0.934027165652 | 3.609213096129 | 1.835170748397  |
| O  | -3.573166514007 | 5.415249470218 | -2.568409806970 |
| O  | -1.775324137474 | 4.655555674494 | -0.113651349868 |
| TV | 5.196951378738  | 0.000000000015 | 0.000000000009  |
| TV | -0.303352843310 | 6.747003503268 | -0.000000000006 |
| TV | 2.289454770032  | 2.755216872835 | 7.022937712483  |

# EQ-CO<sub>2</sub> 95

|    |                 |                 |                 |
|----|-----------------|-----------------|-----------------|
| C  | 1.389289973636  | 3.178247102000  | 3.192704021657  |
| C  | -1.528341998485 | 0.388977697505  | 0.736005035275  |
| C  | -3.090302232017 | 3.392670842903  | -1.512512714434 |
| C  | 4.814577506603  | 3.176064878023  | 3.193919101805  |
| C  | 1.905947066678  | 0.401668815641  | 0.759911890103  |
| C  | 0.334065577321  | 3.352670693047  | -1.480864362449 |
| O  | -0.937508262857 | 0.145890105581  | 1.732315806226  |
| O  | -2.648196459281 | -1.645438596307 | -2.530464893390 |
| O  | -2.120100989776 | 0.624034613425  | -0.261974066243 |
| O  | -0.640416926556 | 1.019494665518  | -2.814823647727 |
| O  | 2.781472740692  | 1.019714132424  | -2.812661208710 |
| O  | -3.672952205684 | 3.238544542869  | -0.493489811917 |
| O  | 0.870440332985  | 2.751215438123  | 2.218184505978  |
| O  | -0.271752213878 | 3.126585977369  | -0.489211983770 |
| O  | 4.299114099392  | 2.745936629274  | 2.218925772466  |
| O  | 2.496407203780  | 0.184442474795  | 1.762893679495  |
| O  | 0.798622513511  | -1.616324329824 | -2.471227746851 |
| O  | 1.315672296138  | 0.612379517674  | -0.244490507021 |
| TV | 6.852969253815  | -0.000000000016 | -0.000000000004 |
| TV | 0.138786181415  | 5.203250979099  | -0.000000000000 |
| TV | 2.548286173724  | 2.586809169246  | 6.981168980577  |

# EQ-CO<sub>2</sub> 96

|   |                 |                |                 |
|---|-----------------|----------------|-----------------|
| C | 1.973005484572  | 2.566551562377 | 3.223403521647  |
| C | -0.777299922393 | 0.623923008893 | 0.811579566084  |
| C | -3.720571559462 | 1.988949188576 | -1.565933053009 |
| C | 1.842759059039  | 5.905116597962 | 3.223415304801  |
| C | -0.907569433923 | 3.962330485815 | 0.811685033026  |

|    |                 |                 |                 |
|----|-----------------|-----------------|-----------------|
| C  | -3.850835608405 | 5.327317174920  | -1.565927030472 |
| O  | -0.227898319496 | 0.213329248139  | 1.775419584862  |
| O  | -3.479089412952 | 1.465028157600  | -2.600215679741 |
| O  | -1.324922495338 | 1.034616524528  | -0.153493725318 |
| O  | -0.862882766183 | -0.176992931491 | -2.813587375892 |
| O  | -0.993080011451 | 3.161436369819  | -2.813486924091 |
| O  | -3.977959583390 | 2.514135176091  | -0.537730208507 |
| O  | 2.315519104769  | 2.057969563927  | 2.211943806159  |
| O  | -4.108148352727 | 5.852354305474  | -0.537634063982 |
| O  | 2.185214842732  | 5.396673595556  | 2.211868131625  |
| O  | -0.358162646612 | 3.551713507401  | 1.775513250789  |
| O  | -3.609314087047 | 4.803577780600  | -2.600288312847 |
| O  | -1.455162158405 | 4.373050564551  | -0.153392954667 |
| TV | 5.267681398699  | -0.000000000006 | -0.000000000002 |
| TV | -0.260576837558 | 6.677046223042  | -0.000000000000 |
| TV | 2.507831949907  | 3.250322443974  | 7.056001570788  |

# EQ-CO<sub>2</sub> 97

|    |                 |                 |                 |
|----|-----------------|-----------------|-----------------|
| C  | -1.469170716501 | 0.711900517913  | -0.666165395395 |
| C  | -2.570121865352 | 3.475915980973  | 2.309736020942  |
| C  | -0.128932716984 | 0.763600547853  | 2.316780344064  |
| C  | -1.064581456330 | 3.655423299705  | 5.278454839800  |
| C  | 1.372492433368  | 0.933680324350  | 5.284531387422  |
| C  | 0.445600937041  | 3.755144568660  | 8.248682759823  |
| O  | -2.493943210891 | 0.121945216657  | -0.650773600399 |
| O  | -1.142499877528 | 0.153153433376  | 2.328305551273  |
| O  | 0.346692154501  | -1.429098581179 | 0.185819127186  |
| O  | 1.800514412189  | -1.394852169769 | 3.153798061819  |
| O  | -0.454402366323 | 3.093342461122  | 4.434401155666  |
| O  | 2.409538306029  | 1.501243867150  | 5.267062415403  |
| O  | -1.974730508078 | 2.897528470181  | 1.465517648676  |
| O  | 0.334973592927  | 0.366286944177  | 5.299277492673  |
| O  | 0.883914811989  | 1.374362062303  | 2.301898498299  |
| O  | 3.294275758634  | -1.229930413643 | 6.123915246034  |
| O  | 1.055626057365  | 3.192366161319  | 7.405184405190  |
| O  | 4.010738928418  | 1.595299947668  | 8.227801322183  |
| TV | 5.366763566693  | 0.000000000000  | -0.000000000001 |
| TV | 0.402820750275  | 5.449969445925  | 0.000000000001  |
| TV | 4.452487260983  | 0.296844009910  | 8.906759979363  |

# EQ-CO<sub>2</sub> 98

|   |                 |                |                 |
|---|-----------------|----------------|-----------------|
| C | 1.495340170735  | 2.436932244395 | 3.131336621096  |
| C | -1.335838203461 | 0.789272391631 | 0.880457537249  |
| C | -3.526557457080 | 2.031238840280 | -1.546126072122 |
| C | 1.552368593540  | 5.948708601555 | 3.143972871904  |
| C | -1.282679522723 | 4.308508338187 | 0.880501554667  |
| C | -3.473004284201 | 5.550964347452 | -1.545149887574 |
| O | -0.992725159903 | 1.366049131008 | 1.855069156680  |
| O | -2.886575466087 | 2.052561216207 | -2.541843298361 |
| O | -1.688398184841 | 0.213960773820 | -0.091214929757 |
| O | -0.451719584187 | 0.326870159390 | -2.899298066690 |
| O | -0.394980326790 | 3.843456047545 | -2.883519726118 |
| O | -4.172292875200 | 2.004681601924 | -0.555086982154 |
| O | 1.473412929306  | 3.065763971658 | 2.129221381769  |
| O | -4.118102792715 | 5.524915535323 | -0.553672944496 |
| O | 1.529434280906  | 6.573295017694 | 2.139408097772  |
| O | -0.939746093962 | 4.885241438484 | 1.855181619082  |

|    |                 |                 |                 |
|----|-----------------|-----------------|-----------------|
| O  | -2.833621277230 | 5.571751194866  | -2.541303521759 |
| O  | -1.634875755062 | 3.733078999121  | -0.091237654199 |
| TV | 5.064430361736  | -0.000000000001 | -0.000000000000 |
| TV | 0.106603488826  | 7.037333306405  | -0.000000000000 |
| TV | 1.982229910958  | 1.481424449030  | 7.032948346950  |

# EQ-CO<sub>2</sub> 99

|    |                 |                 |                 |
|----|-----------------|-----------------|-----------------|
| C  | 1.281012029470  | 2.208201074338  | 3.161759873298  |
| C  | -1.444371594827 | 0.409774082334  | 0.868896179501  |
| C  | -3.686854852240 | 2.670658504689  | -1.549204940739 |
| C  | 1.235824027331  | 5.643417794177  | 3.161700956257  |
| C  | -1.489540580861 | 3.846424929129  | 0.868102738304  |
| C  | -3.732105444137 | 6.107406383878  | -1.548901705020 |
| O  | -1.187687702556 | -0.182325433153 | 1.860296432418  |
| O  | -3.083363305740 | -0.869710769418 | -2.587462250613 |
| O  | -1.711012507190 | 1.000575031685  | -0.120651182277 |
| O  | -0.612497209832 | 0.900690537220  | -2.911460022111 |
| O  | -0.657937073052 | 4.335512594586  | -2.911316032416 |
| O  | -4.248899119519 | 2.779538407281  | -0.513659040810 |
| O  | 1.248184487555  | 1.604490197524  | 2.144280839102  |
| O  | -4.294198267750 | 6.215807308133  | -0.513331039172 |
| O  | 1.203997181786  | 5.040516252560  | 2.143653280023  |
| O  | -1.233031355847 | 3.254806416332  | 1.859823914091  |
| O  | -3.127988431915 | 2.566122132687  | -2.587702971235 |
| O  | -1.755410997144 | 4.437068896125  | -0.121686158121 |
| TV | 5.081745434340  | -0.000000000006 | -0.000000000003 |
| TV | -0.089885267652 | 6.872768281313  | 0.000000000000  |
| TV | 1.935368456777  | 1.910938693660  | 7.091054852689  |

# EQ-CO<sub>2</sub> 100

|    |                 |                 |                 |
|----|-----------------|-----------------|-----------------|
| C  | 6.677163943784  | -1.517536122318 | 2.427457357345  |
| C  | -0.414856779397 | -1.844197086272 | -2.572568159291 |
| C  | -2.379589865585 | -1.993915891533 | 1.490473968945  |
| C  | 8.052563405208  | -2.258784073983 | 5.490861519978  |
| C  | 0.935450859730  | -2.480199330576 | 0.558702318228  |
| C  | -1.009723583724 | -2.744178982261 | 4.557696199842  |
| O  | -2.177531424400 | -2.722706970020 | 0.580140802166  |
| O  | 6.877242052525  | -2.252979901629 | 1.521891295809  |
| O  | -0.219677791798 | -2.575617523550 | -3.482718127840 |
| O  | -0.608986868696 | -1.109626384798 | -1.664357889047 |
| O  | 0.658462894954  | -1.738297492847 | 1.440207441601  |
| O  | 6.476475172656  | -0.783549373218 | 3.333703042796  |
| O  | -2.583662222889 | -1.266143879056 | 2.401254402485  |
| O  | 7.861851250016  | -1.524608414470 | 6.399011749416  |
| O  | -1.216073728997 | -2.013779271720 | 5.465459062527  |
| O  | -0.805493276626 | -3.475503685342 | 3.650556518090  |
| O  | 8.243035233651  | -2.995764784251 | 4.583886233045  |
| O  | 1.214500743960  | -3.223697301650 | -0.319240215735 |
| TV | 12.296017464319 | -0.000000000001 | 0.000000000008  |
| TV | 0.968429355051  | 3.408555410222  | -0.000000000009 |
| TV | 2.729932228676  | -1.506619449733 | 6.120074788637  |

# EQ-CO<sub>2</sub> 101

|   |                 |                |                 |
|---|-----------------|----------------|-----------------|
| C | 0.904529499851  | 2.637936489982 | 3.247960090850  |
| C | -1.268316126361 | 0.306672893239 | 0.805507510455  |
| C | -2.422869410991 | 3.396547653511 | -1.553367693361 |
| C | 4.330050027593  | 2.637985806846 | 3.248097223779  |

|    |                 |                 |                 |
|----|-----------------|-----------------|-----------------|
| C  | 2.157363628193  | 0.306637555361  | 0.805454035566  |
| C  | 1.002748153248  | 3.396515406897  | -1.553224219504 |
| O  | -1.148767726665 | -0.320709895913 | 1.801163497612  |
| O  | -1.883019633668 | -1.634571337713 | -2.575612537140 |
| O  | -1.388826138109 | 0.926579228682  | -0.195774901114 |
| O  | -0.071458039627 | 0.971699378529  | -2.917772188533 |
| O  | 3.354125760129  | 0.971744110625  | -2.917671410821 |
| O  | -3.015220219390 | 3.382505371589  | -0.528947789717 |
| O  | 0.411927865986  | 2.195546339968  | 2.268070714107  |
| O  | 0.410214224601  | 3.382524381801  | -0.528908549423 |
| O  | 3.837506851091  | 2.195631365256  | 2.268157844681  |
| O  | 2.276796118091  | -0.320673205421 | 1.801172180798  |
| O  | 1.542835127713  | -1.634746733877 | -2.575323990305 |
| O  | 2.036940042235  | 0.926532101751  | -0.195840947468 |
| TV | 6.851161802227  | -0.000000000012 | -0.000000000006 |
| TV | 0.054578011970  | 5.060925432687  | -0.000000000000 |
| TV | 1.466738409043  | 2.101668093238  | 7.150359213608  |

# EQ-CO<sub>2</sub> 102

|    |                 |                 |                 |
|----|-----------------|-----------------|-----------------|
| C  | -1.967279624192 | -0.780206450587 | 0.570992570618  |
| C  | 1.075693316596  | 0.945748186282  | 2.064184118408  |
| C  | -3.657380668326 | -1.046601213915 | 3.872105795213  |
| C  | -0.613001280843 | 0.687746668051  | 5.359509636519  |
| C  | -5.378060593758 | -1.243830702419 | 7.222456827008  |
| C  | -2.303639422611 | 0.426351848985  | 8.659314373110  |
| O  | 1.878558550779  | -1.993622700835 | 1.813050083993  |
| O  | 0.189033297473  | -2.250060535431 | 5.109080493682  |
| O  | -1.070655684175 | -1.440347734306 | 0.168875334464  |
| O  | -2.762058975948 | -1.705997061739 | 3.466238164588  |
| O  | -4.554853851727 | -0.388697308866 | 4.277106318410  |
| O  | -1.585812161708 | 0.062393179012  | 5.609583810823  |
| O  | -2.864550788878 | -0.120521594093 | 0.972558618321  |
| O  | -1.503925016908 | -2.510416320119 | 8.402631650743  |
| O  | 0.102534050492  | 0.321692697840  | 2.315107839213  |
| O  | -4.501073009242 | -1.960496469771 | 6.880763515229  |
| O  | -6.255990676493 | -0.528958610367 | 7.568476103862  |
| O  | -3.272786449983 | -0.201460414826 | 8.914557555011  |
| TV | 7.274545036286  | -0.000000000007 | 0.000000000005  |
| TV | 0.171259897221  | 3.563199616745  | -0.000000000005 |
| TV | -5.069528321994 | -0.782121490138 | 9.885137080338  |

# EQ-CO<sub>2</sub> 103

|   |                 |                 |                 |
|---|-----------------|-----------------|-----------------|
| C | -1.701221044437 | 0.605944128875  | -0.735784498627 |
| C | -2.719271942957 | 3.700146447709  | 2.277385280796  |
| C | -0.170685396892 | 0.918906709976  | 2.130764659823  |
| C | -1.192397709637 | 3.962410737960  | 5.197564124928  |
| C | 1.380096617119  | 1.224404597569  | 5.056994261109  |
| C | 0.149982805474  | 4.274513792642  | 8.150153538306  |
| O | -2.708523313603 | -0.007124148173 | -0.651822326238 |
| O | -1.187114360021 | 0.334185638113  | 2.286991759972  |
| O | 0.181891828002  | -1.526028220635 | 0.165042238688  |
| O | 1.794017338015  | -1.108877639747 | 3.102267155333  |
| O | -0.545488413884 | 3.394683469815  | 4.384953103795  |
| O | 2.396896279592  | 1.830418224492  | 5.038027459934  |
| O | -2.144520752176 | 3.076616053827  | 1.452824539350  |
| O | 0.364709491215  | 0.618954371969  | 5.075312875604  |
| O | 0.846685918249  | 1.502578538445  | 1.969500302711  |

|    |                |                 |                 |
|----|----------------|-----------------|-----------------|
| O  | 3.250131696776 | -0.904818792977 | 6.013428531313  |
| O  | 0.795017097659 | 3.706761009508  | 7.335622525229  |
| O  | 3.715502828805 | 2.152139904126  | 7.977971722465  |
| TV | 5.440881973574 | -0.000000000000 | -0.000000000001 |
| TV | 0.354988896321 | 5.435407100044  | 0.000000000001  |
| TV | 4.407358338180 | 0.935354808582  | 8.796581612490  |

# EQ-CO<sub>2</sub> 104

|    |                 |                 |                 |
|----|-----------------|-----------------|-----------------|
| C  | 4.613608640771  | -1.448572452936 | 3.561267314352  |
| C  | 0.124620019155  | -2.571436318457 | -3.320280180440 |
| C  | -1.544946951041 | -1.180411154740 | 1.026193748544  |
| C  | 5.619157758059  | -1.966604910590 | 7.277519503933  |
| C  | 1.130347118697  | -3.089536673819 | 0.395998853855  |
| C  | -0.539476069873 | -1.698570203633 | 4.742424961316  |
| O  | -1.726379266542 | -1.987143984956 | 0.179226415693  |
| O  | 4.433070813606  | -2.244846923221 | 2.703748838163  |
| O  | -0.042056872553 | -3.396229593799 | -4.153194421512 |
| O  | 0.291268689769  | -1.747636606174 | -2.486372139023 |
| O  | 1.297073593290  | -2.265765344523 | 1.229914079580  |
| O  | 4.797038808934  | -0.652746326968 | 4.417867991846  |
| O  | -1.367634486726 | -0.373467279273 | 1.874495001388  |
| O  | 5.802724279135  | -1.171157351177 | 8.134440835981  |
| O  | -0.362053486555 | -0.891625173884 | 5.590703221256  |
| O  | -0.720892177599 | -2.505326663425 | 3.895478602815  |
| O  | 5.438574305831  | -2.762527099193 | 6.419680203452  |
| O  | 0.963641210218  | -3.914333915624 | -0.436900047252 |
| TV | 8.229185755786  | -0.000000000005 | 0.000000000003  |
| TV | -0.218517964026 | 4.051738592350  | -0.000000000005 |
| TV | 2.011381398247  | -1.036264510955 | 7.432482508979  |

# EQ-CO<sub>2</sub> 105

|    |                 |                 |                 |
|----|-----------------|-----------------|-----------------|
| C  | 1.705713079529  | 1.910895255468  | 3.177517664316  |
| C  | -0.533292760452 | 0.448070597668  | 0.751811245772  |
| C  | -3.462221039259 | 2.042474803869  | -1.459655879420 |
| C  | 1.408735102086  | 5.418040946071  | 3.177514623970  |
| C  | -0.830315545991 | 3.955132355374  | 0.751691629666  |
| C  | -3.758536975547 | 5.550395849140  | -1.457201037325 |
| O  | -0.188275403041 | -0.103060833741 | 1.739840582462  |
| O  | -3.464642251802 | 1.424354780415  | -2.468562247057 |
| O  | -0.865308695800 | 0.999802775619  | -0.241346086550 |
| O  | -0.875705816085 | -0.158825096787 | -2.935687291841 |
| O  | -1.172061809280 | 3.348392195868  | -2.935335257590 |
| O  | -3.471029365837 | 2.661783779613  | -0.450741889525 |
| O  | 2.287372718809  | 1.496466625593  | 2.234966130850  |
| O  | -3.768302032762 | 6.169992814603  | -0.448456226384 |
| O  | 1.989854791319  | 5.003521391455  | 2.234682310212  |
| O  | -0.484857369677 | 3.403773033528  | 1.739435870999  |
| O  | -3.760095642836 | 4.932377923619  | -2.466137433686 |
| O  | -1.162810017118 | 4.507064835038  | -0.241197838469 |
| TV | 5.108263139968  | -0.000000000006 | -0.000000000004 |
| TV | -0.594104892104 | 7.014143898991  | -0.000000000002 |
| TV | 2.004797735043  | 2.479844142328  | 7.061904049895  |

# EQ-CO<sub>2</sub> 106

|   |                 |                |                 |
|---|-----------------|----------------|-----------------|
| C | 1.355409496085  | 2.098188473461 | 3.131990573942  |
| C | -1.618415236389 | 0.889323395104 | 0.878092292303  |
| C | -3.808518766636 | 2.867837926238 | -1.518370195736 |

|    |                 |                 |                 |
|----|-----------------|-----------------|-----------------|
| C  | 1.194749495595  | 5.660909938822  | 3.135798850445  |
| C  | -1.752188091437 | 4.459813280949  | 0.876858272670  |
| C  | -3.964552913106 | 6.435934011738  | -1.516777337053 |
| O  | -1.643952070142 | 0.295168213906  | 1.902056399243  |
| O  | -3.128842521327 | -1.212354909673 | -2.442973664339 |
| O  | -1.603920822013 | 1.489209388550  | -0.141441855307 |
| O  | -0.769089472187 | 0.758869649429  | -2.980089247042 |
| O  | -0.919629769502 | 4.500386033661  | -2.983063420927 |
| O  | -4.322266463791 | 3.377376167820  | -0.582279800310 |
| O  | 0.770014217895  | 2.016087564146  | 2.105015068275  |
| O  | -4.479328176520 | 6.946337209517  | -0.581830564064 |
| O  | 0.607409118157  | 5.748752018748  | 2.109971926685  |
| O  | -1.780928353997 | 3.863933189009  | 1.900505514747  |
| O  | -3.286478288143 | 2.355229243871  | -2.447797568364 |
| O  | -1.737169570360 | 5.059348142999  | -0.142526374942 |
| TV | 5.027175099883  | -0.000000000005 | -0.000000000004 |
| TV | -0.309836631235 | 7.134846020437  | 0.000000000000  |
| TV | 2.560506219134  | 4.814534696055  | 7.134162660196  |

# EQ-CO<sub>2</sub> 107

|    |                 |                 |                 |
|----|-----------------|-----------------|-----------------|
| C  | -1.661460482621 | -0.941922987325 | 0.012364230936  |
| C  | 1.753922978812  | 1.267861654324  | 1.682528149161  |
| C  | -3.120839774614 | -0.064362516290 | 3.146759090395  |
| C  | 0.288318500496  | 2.114610422997  | 4.721539714197  |
| C  | -4.613984779892 | 0.775428656767  | 6.271221772376  |
| C  | -1.138580711756 | 2.998964782316  | 7.814749529256  |
| O  | 2.019546951123  | -1.834511945868 | 1.382196767579  |
| O  | 0.556771646225  | -0.967705816298 | 4.460899331928  |
| O  | -0.573101794407 | -0.584318027548 | -0.288418047448 |
| O  | -2.059253031371 | 0.299732144334  | 2.769351222755  |
| O  | -4.176621777257 | -0.434574361930 | 3.532076564454  |
| O  | -0.802329564318 | 1.736947446392  | 4.983519652758  |
| O  | -2.751066679180 | -1.297747414873 | 0.312003970738  |
| O  | -0.897597897122 | -0.116673073442 | 7.424190368752  |
| O  | 0.666092758642  | 0.910202079590  | 1.986942665016  |
| O  | -3.555210421484 | 1.168142647422  | 5.914021857103  |
| O  | -5.669632221043 | 0.379900396563  | 6.632145686100  |
| O  | -2.197450927939 | 2.649094770275  | 8.211155654236  |
| TV | 7.626480343462  | -0.000000000020 | 0.000000000011  |
| TV | 0.821849875418  | 3.462176969667  | -0.000000000010 |
| TV | -4.500707188105 | 2.617656405977  | 9.306519746027  |

# EQ-CO<sub>2</sub> 108

|   |                 |                 |                 |
|---|-----------------|-----------------|-----------------|
| C | 2.243647526418  | 2.010924999776  | 5.324750457504  |
| C | -0.137952183679 | 1.864037073803  | 0.843474499556  |
| C | -5.438468224751 | 2.492892821779  | -3.743043116253 |
| C | 5.562855396638  | 1.914353443578  | 5.291712634800  |
| C | 3.154390420449  | 1.826513523522  | 0.784760658212  |
| C | -2.127347931409 | 2.335871492655  | -3.734390574701 |
| O | 0.458203490973  | 2.144053693057  | 1.828104365262  |
| O | -5.999016254846 | 2.201586650614  | -4.744724207655 |
| O | -0.729767261907 | 1.560374405279  | -0.135191595209 |
| O | 0.481173960498  | -0.052230191912 | -2.398536094052 |
| O | 3.774860686014  | -0.254154850531 | -2.480999413084 |
| O | -4.876860295512 | 2.802082778494  | -2.747216259804 |
| O | 2.607967858608  | 1.414002831892  | 6.280503698048  |
| O | -1.601274059756 | 2.645974636072  | -2.720290240641 |

|    |                 |                 |                 |
|----|-----------------|-----------------|-----------------|
| O  | 5.952370876867  | 1.419391144446  | 6.294068526887  |
| O  | 3.674239050900  | 2.122958514654  | 1.806262026714  |
| O  | -2.656225653675 | 2.037252078959  | -4.751081575538 |
| O  | 2.633499143004  | 1.512230595956  | -0.231468033005 |
| TV | 6.659975915555  | -0.000000000004 | 0.000000000004  |
| TV | 2.707406195715  | 5.658469449705  | -0.000000000008 |
| TV | 1.397626270091  | 2.661630206571  | 6.769439335372  |

# EQ-CO<sub>2</sub> 109

|    |                 |                 |                 |
|----|-----------------|-----------------|-----------------|
| C  | 1.068603960871  | 2.402811738792  | 3.081600149205  |
| C  | -1.371216650035 | 0.426380060326  | 0.855869277807  |
| C  | -3.197326784213 | 3.104424525418  | -1.509766883473 |
| C  | 1.064997692313  | 6.366158866571  | 3.081580786539  |
| C  | -1.374839395986 | 4.389695141892  | 0.855848364889  |
| C  | -3.200938807877 | 7.067752470202  | -1.509747232377 |
| O  | -1.281316545974 | -0.302739948228 | 1.783279219014  |
| O  | -2.577300871737 | -0.892165278705 | -2.519419974566 |
| O  | -1.469439934483 | 1.147136433051  | -0.077761442476 |
| O  | -0.258358789043 | 1.129345570538  | -2.928482858309 |
| O  | -0.261970835858 | 5.092698212990  | -2.928506379644 |
| O  | -3.814582737439 | 3.144832172823  | -0.500971310531 |
| O  | 0.979718340813  | 1.657287480445  | 2.167268190909  |
| O  | -3.818210316082 | 7.108150178900  | -0.500958361055 |
| O  | 0.976122720936  | 5.620605934558  | 2.167271141145  |
| O  | -1.284906215664 | 3.660579037162  | 1.783256035769  |
| O  | -2.580915011057 | 3.071136442659  | -2.519441523514 |
| O  | -1.473096656741 | 5.110447879033  | -0.077778328877 |
| TV | 4.670360804862  | -0.000000000007 | -0.000000000003 |
| TV | -0.007224671787 | 7.926630310952  | 0.000000000000  |
| TV | 1.425468286480  | 2.010208872771  | 6.930969384653  |

# EQ-CO<sub>2</sub> 110

|    |                 |                 |                 |
|----|-----------------|-----------------|-----------------|
| C  | 0.699689758703  | 1.375379350053  | 3.022376629469  |
| C  | -2.356047506977 | 1.523867640872  | 0.809796376069  |
| C  | -4.862475258372 | 2.489525529156  | -1.473874743441 |
| C  | 0.243975108374  | 4.789993288428  | 3.027215917149  |
| C  | -2.855882417379 | 4.940611640411  | 0.849471095295  |
| C  | -5.309958253617 | 5.901635783372  | -1.468582874988 |
| O  | 0.556987375606  | 0.754000470799  | 2.024706076773  |
| O  | -4.226827507058 | 2.428451987385  | -2.470857707065 |
| O  | -2.589910265865 | 0.903577509814  | -0.170780467952 |
| O  | -1.159099488582 | 0.651941413219  | -2.748813588485 |
| O  | -1.607920035613 | 4.061521130907  | -2.742111378847 |
| O  | -5.499540586719 | 2.548941364305  | -0.478013211728 |
| O  | 3.394269548638  | 2.143340167940  | 1.794133326052  |
| O  | -5.948739730514 | 5.957811735394  | -0.473599320514 |
| O  | 2.827160777429  | 5.570676714423  | 1.840279022398  |
| O  | 0.095324256356  | 4.173324538981  | 2.027389675524  |
| O  | -4.672137478165 | 5.843679391473  | -2.464410932802 |
| O  | -3.024629911428 | 4.310363421383  | -0.137628135905 |
| TV | 5.530269611755  | -0.000000000003 | 0.000000000000  |
| TV | -0.891224439345 | 6.823591949125  | -0.000000000002 |
| TV | 2.019546654860  | 1.343845559679  | 6.766496576775  |

# EQ-CO<sub>2</sub> 111

|   |                 |                 |                 |
|---|-----------------|-----------------|-----------------|
| C | -1.728190229599 | -0.932745098693 | -0.087306774638 |
| C | -0.867588652078 | 1.027409401167  | 2.959604930530  |

|    |                 |                 |                 |
|----|-----------------|-----------------|-----------------|
| C  | 1.590641000243  | -0.945736233988 | -0.022224589828 |
| C  | 2.449291092751  | 1.026041767236  | 2.960425905952  |
| C  | 4.937917529458  | -0.962851055664 | -0.052938033781 |
| C  | 5.776355740765  | 1.069103381164  | 2.922211666129  |
| O  | 0.962121241301  | -4.199467905237 | 2.298487325363  |
| O  | 4.213101526199  | -4.226973187217 | 2.287671398069  |
| O  | 1.072631782141  | -1.821493263122 | 0.581348269750  |
| O  | 4.452472078868  | -1.819329299272 | 0.602375069844  |
| O  | 2.110113070866  | -0.068061945712 | -0.625164618843 |
| O  | 2.009911861304  | 1.892526227048  | 3.633392681614  |
| O  | -1.183254393619 | -0.087045873490 | -0.712481599248 |
| O  | 7.589189564307  | -4.183435713863 | 2.281878008242  |
| O  | -1.369838732185 | 1.868218840819  | 3.621855416017  |
| O  | 7.722319810404  | -1.776352098024 | 0.534125610112  |
| O  | 5.423783275518  | -0.106099541497 | -0.711452263391 |
| O  | 5.286310117035  | 1.935724708335  | 3.560414648019  |
| TV | 9.999131831442  | -0.000000000009 | 0.000000000009  |
| TV | -1.325698767521 | 4.383589897701  | -0.000000000010 |
| TV | -3.663274687849 | -4.338015400617 | 6.031844307356  |

# EQ-CO<sub>2</sub> 112

|    |                 |                 |                 |
|----|-----------------|-----------------|-----------------|
| C  | 0.146509352549  | 1.325112509897  | 2.929999443838  |
| C  | -2.712473798128 | 1.152746343882  | 0.790853086833  |
| C  | -5.417502409689 | 3.120758001158  | -1.418892614697 |
| C  | -0.168904659117 | 4.864801730663  | 2.929942338837  |
| C  | -3.028018060584 | 4.692093239768  | 0.790176899550  |
| C  | -5.731886551586 | 6.659297287278  | -1.420332392196 |
| O  | -0.089676225505 | 0.686486863685  | 1.961202462610  |
| O  | -5.191705542923 | 3.785279903143  | -2.372226780515 |
| O  | -2.564697475960 | 0.514449687645  | -0.194568779822 |
| O  | -2.384269073894 | 2.286414144275  | -2.621833053182 |
| O  | -2.699381281189 | 5.825970706194  | -2.621887888562 |
| O  | -5.636234620569 | 2.452368279453  | -0.466548430368 |
| O  | 2.696897375073  | 1.786965461213  | 1.778645204745  |
| O  | -5.951209938949 | 5.993146957899  | -0.466517563034 |
| O  | 2.381186651094  | 5.326199174029  | 1.778006532393  |
| O  | -0.405420717755 | 4.226273561329  | 1.961152213572  |
| O  | -5.505884979520 | 7.321555065028  | -2.375203749937 |
| O  | -2.880093650177 | 4.053853455959  | -0.195271172582 |
| TV | 5.566094650814  | 0.000000000011  | 0.000000000105  |
| TV | -0.630753043556 | 7.079359972061  | 0.000000000060  |
| TV | 2.773001279138  | -0.321891511683 | 6.517937888333  |

# EQ-CO<sub>2</sub> 113

|   |                 |                 |                |
|---|-----------------|-----------------|----------------|
| C | -1.166455949406 | -0.822586073640 | 0.416013930272 |
| C | 0.430166037439  | 1.695277984452  | 2.076639709073 |
| C | -3.177617742659 | -0.774322580053 | 3.790261968782 |
| C | -1.513508064885 | 1.739793968606  | 5.376303735166 |
| C | -5.057580304375 | -0.729399464541 | 7.023392387383 |
| C | -3.369154964144 | 1.791566077929  | 8.734276227505 |
| O | 1.602903521478  | -3.284365147855 | 2.146452292702 |
| O | -0.341498507555 | -3.245015093479 | 5.291431208863 |
| O | 0.015002514396  | -0.822936911790 | 0.336566937898 |
| O | -1.993142541216 | -0.772352943215 | 3.789537150880 |
| O | -4.362078313527 | -0.777053053580 | 3.790545589104 |
| O | -2.695205732081 | 1.738856028296  | 5.456606179940 |
| O | -2.347852926931 | -0.823001104363 | 0.498322779890 |



|    |                 |                 |                 |
|----|-----------------|-----------------|-----------------|
| O  | -2.194314803411 | -3.190695728410 | 8.729755586640  |
| O  | -0.751681696157 | 1.688648663213  | 1.999821176594  |
| O  | -3.875931439484 | -0.728185884689 | 6.947386394457  |
| O  | -6.239849467788 | -0.730373392427 | 7.093584422095  |
| O  | -4.553353246136 | 1.787697304728  | 8.738642746672  |
| TV | 5.204616240605  | 0.000000000007  | 0.000000000013  |
| TV | 0.009638027545  | 4.985837166835  | -0.000000000004 |
| TV | -5.714275523756 | 0.141791651914  | 9.890326088476  |

# EQ-CO<sub>2</sub> 114

|    |                 |                 |                 |
|----|-----------------|-----------------|-----------------|
| C  | -2.283811495264 | -0.280588113461 | 0.411807861392  |
| C  | 2.373574747848  | 1.339395333752  | 2.067836101368  |
| C  | -1.394709101565 | -0.346958132700 | 3.797470212224  |
| C  | 3.276822068934  | 1.501604280938  | 5.483251981505  |
| C  | -0.415507816037 | -0.163573231393 | 7.151943002319  |
| C  | 4.239445867955  | 1.563134464165  | 8.893107816283  |
| O  | 2.380309189703  | -1.710449105309 | 2.375709939302  |
| O  | 3.247509641338  | -1.526836301602 | 5.877741932936  |
| O  | -1.224820338481 | 0.076595830116  | 0.801413643162  |
| O  | -0.309159452271 | 0.011938307861  | 4.103299715112  |
| O  | -2.481000428430 | -0.705173941349 | 3.493693584729  |
| O  | 2.228712508229  | 1.120938747974  | 5.087099362608  |
| O  | -3.341385683039 | -0.639412728765 | 0.019966349230  |
| O  | 4.249833304601  | -1.496905341244 | 9.201411003983  |
| O  | 1.289770085800  | 0.979736524278  | 1.757787530025  |
| O  | 0.675807864919  | 0.183321914670  | 7.451089355577  |
| O  | -1.505357590543 | -0.512193956629 | 6.849159137895  |
| O  | 3.150796088054  | 1.215229720823  | 8.584998529614  |
| TV | 7.270708153135  | 0.000000000000  | 0.000000000001  |
| TV | 1.077954956366  | 3.408459997784  | -0.000000000001 |
| TV | 2.871428965960  | 0.143107610967  | 10.152501708845 |

# EQ-CO<sub>2</sub> 115

|    |                 |                 |                 |
|----|-----------------|-----------------|-----------------|
| C  | 4.427339195847  | -0.916383853224 | 0.611621491390  |
| C  | 0.329990629193  | -1.740511067779 | -1.224467956233 |
| C  | -1.425396375113 | -1.856428847556 | 1.720044317729  |
| C  | 5.135097705431  | 2.504800664432  | 0.612074648490  |
| C  | 1.037709851721  | 1.681118255053  | -1.224574901965 |
| C  | -0.717714209006 | 1.564939413060  | 1.720053499962  |
| O  | -1.834619904599 | -2.396713839114 | 0.748806201789  |
| O  | 3.939418076704  | -1.441912718366 | -0.329543225499 |
| O  | -0.222641320092 | -2.238276499145 | -2.146895037683 |
| O  | 0.886522241947  | -1.243094133698 | -0.307515963140 |
| O  | 1.594272253606  | 2.178464268778  | -0.307590462825 |
| O  | 4.907646663559  | -0.391598307906 | 1.560827086826  |
| O  | -1.016110414315 | -1.316358129153 | 2.690487362419  |
| O  | 5.615356516770  | 3.029891575557  | 1.561138653825  |
| O  | -0.308655726772 | 2.105029864099  | 2.690580375371  |
| O  | -1.126762021914 | 1.024679349698  | 0.748725443660  |
| O  | 4.647226474426  | 1.979019996074  | -0.328999921098 |
| O  | 0.485141574298  | 1.183517116665  | -2.147126409299 |
| TV | 9.068645894465  | -0.000000000004 | 0.000000000008  |
| TV | 1.415317535854  | 6.842941014498  | -0.000000000010 |
| TV | 1.430033385332  | -1.002337432656 | 4.103058584329  |

# EQ-CO<sub>2</sub> 116

|   |                |                |                |
|---|----------------|----------------|----------------|
| C | 2.163265378444 | 1.498707990586 | 1.875012583262 |
|---|----------------|----------------|----------------|

|    |                 |                 |                 |
|----|-----------------|-----------------|-----------------|
| C  | -1.480162373449 | 0.496629588194  | 0.590198285902  |
| C  | -3.677613803405 | 3.436534803772  | -0.747432700180 |
| C  | 3.620121310311  | 5.492234960684  | 1.871402292510  |
| C  | -0.008712868261 | 4.471442610427  | 0.542786641942  |
| C  | -2.224755430212 | 7.426187202019  | -0.740476807121 |
| O  | -1.679157448404 | -0.269911369643 | 1.468429131314  |
| O  | -4.078677372397 | -0.046706087696 | -0.595833397420 |
| O  | -1.282288921675 | 1.264573166625  | -0.287386133686 |
| O  | -0.318209247363 | 2.953801339663  | -2.809036881164 |
| O  | 1.148400255331  | 6.926955082096  | -2.813582170951 |
| O  | -4.733996770411 | 2.920224898038  | -0.882980421031 |
| O  | 1.102368192901  | 0.980379261804  | 1.787632953287  |
| O  | -3.280452977970 | 6.908377775226  | -0.876547492482 |
| O  | 2.549396797607  | 4.993882165186  | 1.784646413365  |
| O  | -0.206083185292 | 3.646489939272  | 1.366681107891  |
| O  | -2.621421806932 | 3.951113187258  | -0.602885793906 |
| O  | 0.186786248949  | 5.294247482468  | -0.284124618721 |
| TV | 6.780612496926  | -0.000000000008 | -0.000000000003 |
| TV | 2.909475764739  | 7.988700117468  | -0.000000000000 |
| TV | 3.540970914290  | -0.932579545353 | 4.760995398893  |

# EQ-CO<sub>2</sub> 117

|    |                 |                 |                 |
|----|-----------------|-----------------|-----------------|
| C  | -1.303838375446 | 0.240848528551  | -0.817390332100 |
| C  | -2.457075748433 | 3.954319271369  | 2.127918247097  |
| C  | -0.106653708326 | 1.046052984235  | 2.144783352950  |
| C  | -1.127160809179 | 4.630616493912  | 5.074218031572  |
| C  | 1.226435567049  | 1.740853233820  | 5.150047050220  |
| C  | 0.264093291235  | 5.187265518354  | 8.025942039921  |
| O  | -2.267775159528 | -0.444713930474 | -0.806932472686 |
| O  | -1.077039425800 | 0.368626251183  | 2.149938988919  |
| O  | 0.355441544988  | -1.976176584033 | -0.153647366597 |
| O  | 1.610830971812  | -1.193222753299 | 2.790047293448  |
| O  | -0.440600849570 | 3.938372848260  | 4.403097904907  |
| O  | 2.200653576582  | 2.406961925155  | 5.069189473125  |
| O  | -1.764259515041 | 3.259331917895  | 1.466214217945  |
| O  | 0.252802113906  | 1.073504700231  | 5.233088856822  |
| O  | 0.863951727510  | 1.722042277674  | 2.135307953344  |
| O  | 2.947555143364  | -0.519669955995 | 5.745896624482  |
| O  | 0.945364997542  | 4.486711929373  | 7.359086945452  |
| O  | 3.643008514764  | 2.945675930920  | 8.016113438866  |
| TV | 5.140253072445  | 0.000000000000  | 0.000000000001  |
| TV | 0.381560780652  | 5.843325913729  | -0.000000000002 |
| TV | 3.982969818234  | 2.018698077979  | 8.846089457729  |

# EQ-CO<sub>2</sub> 118

|   |                 |                 |                |
|---|-----------------|-----------------|----------------|
| C | -0.430527709352 | -0.796274320950 | 0.435516770295 |
| C | 0.797409467901  | 1.849743181523  | 1.930522938008 |
| C | -3.117855802687 | -0.752481118908 | 3.415750597707 |
| C | -1.889743881215 | 1.893468493609  | 4.910684985389 |
| C | -5.798144359851 | -0.707639224685 | 6.395959946143 |
| C | -4.576927910717 | 1.938289202914  | 7.890899004857 |
| O | -0.579933401849 | -3.398310841034 | 1.934622749294 |
| O | -3.267083333392 | -3.354345934277 | 4.914710520224 |
| O | 0.753071052601  | -0.777349982757 | 0.438878351008 |
| O | -1.934260465734 | -0.733663796427 | 3.419321982859 |
| O | -4.301972919503 | -0.767448915683 | 3.416018113030 |
| O | -3.073437263851 | 1.904301572714  | 4.907806529411 |

|    |                 |                 |                 |
|----|-----------------|-----------------|-----------------|
| O  | -1.614642808305 | -0.811340916890 | 0.435979303062  |
| O  | -5.954277825300 | -3.309728048380 | 7.895105206843  |
| O  | -0.386282644538 | 1.860640542887  | 1.927558677238  |
| O  | -4.614498339044 | -0.690764858100 | 6.399629405293  |
| O  | -6.982247952931 | -0.720328763642 | 6.396277782564  |
| O  | -5.760633086908 | 1.948760310143  | 7.887833024800  |
| TV | 5.216242456258  | 0.000000000057  | -0.000000000018 |
| TV | 2.561278946081  | 5.235139459682  | -0.000000000002 |
| TV | -8.062138991471 | 0.131908688196  | 8.940671814331  |

# EQ-CO<sub>2</sub> 119

|    |                 |                |                 |
|----|-----------------|----------------|-----------------|
| C  | 1.676275475684  | 1.637714268792 | 3.052907853120  |
| C  | -1.492634259135 | 1.959453868629 | 0.747832198843  |
| C  | -4.647025325521 | 2.354688367726 | -1.491176260092 |
| C  | 0.400670534103  | 4.797009274169 | 3.027485857894  |
| C  | -2.769174837182 | 5.161721655505 | 0.748516414825  |
| C  | -5.934277108513 | 5.554356605564 | -1.489339007347 |
| O  | -0.861422921861 | 1.547234747916 | 1.659684849209  |
| O  | -4.175661680781 | 1.893585729972 | -2.475488209635 |
| O  | -2.123259406626 | 2.372421575093 | -0.163942119354 |
| O  | -1.007379278141 | 1.043308440389 | -2.504602803913 |
| O  | -2.330895285950 | 4.275213504147 | -2.587342344001 |
| O  | -5.127848752119 | 2.810564054634 | -0.510278633758 |
| O  | 2.151377917048  | 1.242454376760 | 2.043724982574  |
| O  | -6.409472449407 | 6.011113591154 | -0.505794541661 |
| O  | 0.921508901889  | 4.325073114788 | 2.075322479729  |
| O  | -2.128874840637 | 4.759649909899 | 1.658524457951  |
| O  | -5.469382902049 | 5.092812139439 | -2.476347195157 |
| O  | -3.408412178701 | 5.564659602768 | -0.161699783667 |
| TV | 6.117577678354  | 0.000000000001 | 0.000000000000  |
| TV | -2.558524894332 | 6.407744817338 | 0.000000000000  |
| TV | 2.221082085481  | 0.995914671820 | 6.572024412393  |

# EQ-CO<sub>2</sub> 120

|    |                 |                 |                 |
|----|-----------------|-----------------|-----------------|
| C  | 1.694457032257  | -0.339666334568 | -0.525826592994 |
| C  | -1.113287090445 | -0.034478443701 | 2.788013491032  |
| C  | 5.156651824278  | -0.349477805250 | -0.527372943975 |
| C  | 2.342152771143  | -0.039708535950 | 2.775991986438  |
| C  | 8.600478017652  | -0.342093428723 | -0.530145696878 |
| C  | 5.797272136147  | -0.035932583516 | 2.777688413993  |
| O  | -5.147177386721 | -0.787822598033 | 3.483243218572  |
| O  | -1.695712958144 | -0.780240125067 | 3.499228770385  |
| O  | 2.332615805621  | 0.417619020865  | -1.173653295160 |
| O  | 5.678818076282  | 0.396244464416  | -1.283830987086 |
| O  | 4.632003117135  | -1.097160719083 | 0.226175330577  |
| O  | 2.924817647876  | 0.711258545854  | 2.069233204097  |
| O  | 1.055490791212  | -1.097444357723 | 0.122509381560  |
| O  | 1.763090127170  | -0.791012312994 | 3.483088058178  |
| O  | -0.528720730667 | 0.712753705988  | 2.079128845049  |
| O  | 9.123786541597  | 0.401984789946  | -1.286715789484 |
| O  | 8.074586070449  | -1.087362723359 | 0.225648938381  |
| O  | 6.382416553937  | 0.716788089758  | 2.075220840734  |
| TV | 10.364054383022 | 0.000000000014  | 0.000000000044  |
| TV | -0.491552471867 | 3.547206444772  | -0.000000000021 |
| TV | -4.116140832139 | 0.656130537371  | 7.039225247207  |

# EQ-CO<sub>2</sub> 121

|    |                 |                 |                 |
|----|-----------------|-----------------|-----------------|
| C  | -1.118100047090 | 0.411535059756  | -0.905264264375 |
| C  | -2.087038096239 | 4.136766662079  | 1.978032195364  |
| C  | 0.187715831424  | 1.174268115223  | 2.063870056985  |
| C  | -0.741049327258 | 4.848968807725  | 4.944278055974  |
| C  | 1.543767759451  | 1.888597614939  | 5.021866175337  |
| C  | 0.639498540611  | 5.502955062708  | 7.912185216124  |
| O  | -2.077390742999 | -0.277668948956 | -0.971163578857 |
| O  | -0.805310838392 | 0.535249668812  | 2.147308316673  |
| O  | 0.523816566004  | -1.869928118862 | -0.317042411081 |
| O  | 1.798330053692  | -1.134530639903 | 2.647525604741  |
| O  | -0.053176705821 | 4.159629094493  | 4.272039505030  |
| O  | 2.534472464112  | 2.530334100085  | 4.939529496706  |
| O  | -1.394531839613 | 3.449506225044  | 1.308053552750  |
| O  | 0.551670143644  | 1.247576612957  | 5.104882910630  |
| O  | 1.180763144539  | 1.813036905430  | 1.983057452014  |
| O  | 3.148060129741  | -0.422140424760 | 5.617798387456  |
| O  | 1.278040859128  | 4.763722221554  | 7.244161948060  |
| O  | 3.894413590842  | 3.255736468425  | 8.057764507556  |
| TV | 5.019427249839  | -0.000000000000 | -0.000000000003 |
| TV | 0.441689951764  | 5.958199921236  | -0.000000000008 |
| TV | 4.054348218658  | 2.153200545720  | 8.896713480157  |

# EQ-CO<sub>2</sub> 122

|    |                 |                 |                 |
|----|-----------------|-----------------|-----------------|
| C  | -0.980020063700 | 0.310231527172  | -1.167342229692 |
| C  | -2.033860773986 | 4.189991846730  | 2.248801134765  |
| C  | 0.172957508290  | 1.085130764373  | 1.824489907683  |
| C  | -0.860823696301 | 4.975469161860  | 5.296030173164  |
| C  | 1.346159260098  | 1.837575922133  | 4.816950080785  |
| C  | 0.302511908393  | 5.614955732458  | 8.237418268120  |
| O  | -1.994801397041 | -0.297478732181 | -1.166580413327 |
| O  | -0.817673302833 | 0.438740875795  | 1.825552320422  |
| O  | 0.524042058588  | -1.906062201865 | -0.146410545562 |
| O  | 1.685920142468  | -1.160459637653 | 2.838893851623  |
| O  | -0.150272252502 | 4.297057762671  | 4.638219017029  |
| O  | 2.338805930893  | 2.483476914234  | 4.812717271011  |
| O  | -1.310660798431 | 3.466197096938  | 1.655970616118  |
| O  | 0.355364046479  | 1.191101029999  | 4.819800354412  |
| O  | 1.162563121074  | 1.735124570534  | 1.822522869558  |
| O  | 2.879186448591  | -0.415551485249 | 5.956845064566  |
| O  | 1.025638303048  | 4.892575570029  | 7.642838614962  |
| O  | 3.534380864564  | 3.091023876239  | 7.804448281498  |
| TV | 4.840487380847  | -0.000000000000 | -0.000000000001 |
| TV | 0.394486366980  | 6.075081002738  | 0.000000000001  |
| TV | 3.499205973766  | 2.171546582207  | 8.973843896674  |

# EQ-CO<sub>2</sub> 123

|   |                 |                 |                 |
|---|-----------------|-----------------|-----------------|
| C | 1.724612535366  | 2.188197160531  | 3.100380140327  |
| C | 0.050924102784  | -1.130926593662 | 0.746106054647  |
| C | -5.337450903701 | 3.818333479942  | -1.490218182513 |
| C | 0.409254100484  | 5.366671052891  | 3.102776275798  |
| C | -1.431590101055 | 1.982522829252  | 0.751675595070  |
| C | -6.788111232590 | 6.989425707296  | -1.587490359202 |
| O | 0.772675955869  | -1.435359940111 | 1.632844824466  |
| O | -5.388127900007 | 3.153437268769  | -0.511256700468 |
| O | -0.668077312489 | -0.826787049930 | -0.143451852007 |
| O | -0.928223798173 | 0.903751553820  | -2.485124509925 |
| O | -2.306115717095 | 4.026156970722  | -2.488064179684 |

|    |                 |                 |                 |
|----|-----------------|-----------------|-----------------|
| O  | -5.300493612199 | 4.475406827834  | -2.475166460883 |
| O  | 2.185228454726  | 1.727736142742  | 2.112050739804  |
| O  | -6.759166285893 | 7.653081052789  | -2.568489376218 |
| O  | 0.930218398315  | 4.962748012781  | 2.119351089396  |
| O  | -0.762241741257 | 1.603313998125  | 1.650788910443  |
| O  | -6.833244369627 | 6.314467036692  | -0.616157471273 |
| O  | -2.101864837016 | 2.360620818647  | -0.147415667007 |
| TV | 6.303781612168  | -0.000000000007 | 0.000000000033  |
| TV | -2.805420690004 | 6.289570466094  | 0.000000000043  |
| TV | 2.207460815163  | 1.748647623620  | 6.580425732526  |

# EQ-CO<sub>2</sub> 124

|    |                 |                 |                 |
|----|-----------------|-----------------|-----------------|
| C  | -1.150327576264 | 0.248276311685  | -1.477800880770 |
| C  | -1.734892673406 | 4.307576043443  | 2.482211119793  |
| C  | 0.052631595778  | 0.969347494706  | 1.571335293476  |
| C  | -0.403700538253 | 4.999480632490  | 5.460279205341  |
| C  | 1.457603651446  | 1.653409924977  | 4.490484055597  |
| C  | 0.889623479420  | 5.706009144226  | 8.451939321487  |
| O  | -2.183098884027 | -0.304814329550 | -1.320367648181 |
| O  | -0.984141168881 | 0.406664826698  | 1.655771621933  |
| O  | 0.447145900169  | -1.704304897603 | 0.152029535714  |
| O  | 1.730622995230  | -1.004683394665 | 3.139259118263  |
| O  | 0.165924642898  | 4.197945884867  | 4.803269125307  |
| O  | 2.491899335292  | 2.206124212296  | 4.326340463336  |
| O  | -1.156598908432 | 3.513120751051  | 1.823969573917  |
| O  | 0.423577467840  | 1.103897578783  | 4.651587659156  |
| O  | 1.089559886106  | 1.535177262398  | 1.484054792642  |
| O  | 3.070875828781  | -0.305399019793 | 6.116747558374  |
| O  | 1.462419785642  | 4.902025934146  | 7.799873770445  |
| O  | 3.795499899931  | 2.912270958156  | 7.309583945816  |
| TV | 4.867191612417  | 0.000000000000  | -0.000000000003 |
| TV | 0.821211897462  | 6.108151993276  | -0.000000000008 |
| TV | 3.913127898757  | 2.107786570061  | 8.950333372329  |

# EQ-CO<sub>2</sub> 125

|    |                 |                 |                 |
|----|-----------------|-----------------|-----------------|
| C  | 1.515529243370  | 1.231485241959  | 2.928702130251  |
| C  | -1.732778624819 | 0.916137252968  | 0.711547546709  |
| C  | -3.845415389031 | 2.748464256416  | -1.350930828905 |
| C  | 2.779215639811  | 4.434817026792  | 2.930083255832  |
| C  | -0.471578103034 | 4.120481571506  | 0.716954175613  |
| C  | -2.582005111256 | 5.954525237454  | -1.352595923201 |
| O  | -2.050575664045 | 0.393334420557  | 1.725230067117  |
| O  | -3.317258920735 | 3.185835031102  | -2.315708014879 |
| O  | -1.429041927119 | 1.443652582758  | -0.304800387636 |
| O  | -0.237934372809 | 2.674325010413  | -2.667982318120 |
| O  | 1.026223003975  | 5.878235752684  | -2.667106025666 |
| O  | -4.364845627953 | 2.312732180210  | -0.379787307691 |
| O  | 0.960116854508  | 0.814484981905  | 1.970590165383  |
| O  | -3.103563516185 | 5.515717312490  | -0.383909866470 |
| O  | 2.223167804186  | 4.018106311338  | 1.972182892619  |
| O  | -0.786366899757 | 3.599419454760  | 1.732533184316  |
| O  | -2.052306851933 | 6.394942500683  | -2.315222119770 |
| O  | -0.170412118504 | 4.644446246371  | -0.301792429877 |
| TV | 6.163534228426  | 0.000000000003  | -0.000000000007 |
| TV | 2.528337731509  | 6.409162788699  | -0.000000000000 |
| TV | 2.311621909264  | -1.030063762518 | 6.554804517013  |

# EQ-CO<sub>2</sub> 126

|    |                 |                 |                 |
|----|-----------------|-----------------|-----------------|
| C  | -0.503403185837 | -0.837018372422 | 0.486477298770  |
| C  | 0.760087468395  | 1.820330207774  | 1.923851200756  |
| C  | -3.433299118211 | -0.846692842099 | 3.541356165117  |
| C  | -2.213041822635 | 1.785244100441  | 4.976871162641  |
| C  | -6.337290856567 | -0.856632144616 | 6.547996264029  |
| C  | -5.122721927288 | 1.778546432681  | 7.981285460485  |
| O  | -0.803486230037 | -3.422299463045 | 1.981699606935  |
| O  | -3.775700721723 | -3.472987021226 | 4.975732530983  |
| O  | 0.678950396305  | -0.856265342841 | 0.543821065188  |
| O  | -2.249252775368 | -0.882853861267 | 3.541867242500  |
| O  | -4.616392113726 | -0.802636962981 | 3.542095336455  |
| O  | -3.396883015202 | 1.807577920969  | 4.978327605132  |
| O  | -1.686180012249 | -0.814038630889 | 0.429619858984  |
| O  | -6.685965506293 | -3.489070568386 | 7.982230637316  |
| O  | -0.422508334942 | 1.833788452419  | 1.866884139639  |
| O  | -5.153414733250 | -0.882744609824 | 6.546854207472  |
| O  | -7.520937680401 | -0.821784384803 | 6.548898092284  |
| O  | -6.306769944412 | 1.810503566264  | 7.980292881473  |
| TV | 5.212128827299  | 0.000000000058  | -0.000000000019 |
| TV | 2.746459139849  | 5.225878493422  | -0.000000000002 |
| TV | -8.836803377934 | -0.057457319954 | 9.112064073799  |

# EQ-CO<sub>2</sub> 127

|    |                 |                 |                 |
|----|-----------------|-----------------|-----------------|
| C  | -1.707270987980 | -0.644359693605 | 0.581054262064  |
| C  | 2.324668533350  | 1.983031214066  | 2.122344080787  |
| C  | 1.094476507061  | -0.607658213481 | 3.663582339749  |
| C  | 5.117121839207  | 2.008399405338  | 5.252471833451  |
| C  | 3.910517905602  | -0.575228561367 | 6.794146210608  |
| C  | 7.939191334461  | 2.038354970463  | 8.333115225460  |
| O  | 0.917708651534  | -3.179520724102 | 2.054411432357  |
| O  | 3.711717927464  | -3.164115293873 | 5.248287274044  |
| O  | -0.522852554479 | -0.624694188546 | 0.578577291014  |
| O  | 2.278912135314  | -0.592242117591 | 3.660162922745  |
| O  | -0.089681006820 | -0.617641704380 | 3.663999314355  |
| O  | 3.932512257214  | 2.019320345860  | 5.256700233372  |
| O  | -2.891680049619 | -0.658744399408 | 0.583980403565  |
| O  | 6.534168132915  | -3.129484608836 | 8.325841658089  |
| O  | 1.142199217217  | 1.985707506853  | 2.188800947156  |
| O  | 5.092677419104  | -0.572406554841 | 6.723809758299  |
| O  | 2.728297148127  | -0.572115981971 | 6.863035699109  |
| O  | 6.754980985718  | 2.039174307970  | 8.338734113905  |
| TV | 5.208903257425  | -0.000000000000 | 0.000000000001  |
| TV | 2.589239699913  | 5.158258813961  | -0.000000000002 |
| TV | 8.477529062908  | 0.101347478419  | 9.343563147406  |

# EQ-CO<sub>2</sub> 128

|   |                 |                 |                |
|---|-----------------|-----------------|----------------|
| C | -0.535812584884 | -0.861396799017 | 0.547731670724 |
| C | 0.831442466569  | 1.774749446840  | 1.871334633722 |
| C | -3.499959287390 | -0.925776428325 | 3.547979746563 |
| C | -2.091503855583 | 1.701778605483  | 4.948102588715 |
| C | -6.438266793077 | -1.008493584536 | 6.593112613516 |
| C | -5.069069931214 | 1.641334379993  | 7.952478270638 |
| O | -0.895975153486 | -3.539468019153 | 1.878700712403 |
| O | -3.818278493378 | -3.606320911012 | 4.956402667422 |
| O | 0.647857352345  | -0.893749211249 | 0.547126621825 |
| O | -2.316597613072 | -0.964154613985 | 3.545097080315 |

|    |                 |                 |                 |
|----|-----------------|-----------------|-----------------|
| O  | -4.683401882282 | -0.883314930428 | 3.548754890558  |
| O  | -3.274870136101 | 1.750477788109  | 4.944026920530  |
| O  | -1.718887067625 | -0.820170442437 | 0.548674200603  |
| O  | -6.795448780942 | -3.653373662652 | 7.958106915625  |
| O  | -0.352076108813 | 1.828177493136  | 1.863519871717  |
| O  | -5.255431030759 | -1.042177242534 | 6.648657583941  |
| O  | -7.620150183987 | -0.969343837334 | 6.535037073120  |
| O  | -6.252588876744 | 1.675682290100  | 7.949770289565  |
| TV | 5.215406510882  | 0.000000000058  | -0.000000000019 |
| TV | 2.909701018634  | 5.252347856259  | -0.000000000002 |
| TV | -9.009046257463 | -0.230668258356 | 9.085718537051  |

# EQ-CO<sub>2</sub> 129

|    |                 |                 |                 |
|----|-----------------|-----------------|-----------------|
| C  | 1.628264033579  | 3.809430573392  | 3.042351744342  |
| C  | -0.310870025030 | 0.656061386495  | 0.911688824650  |
| C  | -4.979320944822 | 2.660068172070  | -1.563581369308 |
| C  | 0.790211055728  | 6.985582071500  | 3.039473627653  |
| C  | -1.161928087781 | 3.904834261639  | 0.912231983398  |
| C  | -5.829409301886 | 5.931866698652  | -1.695142688087 |
| O  | -0.039270203840 | 1.331415818418  | 1.845430451819  |
| O  | -4.357870210479 | 2.234315504882  | -0.650278028157 |
| O  | -0.572582114256 | -0.017413499731 | -0.025492985269 |
| O  | -1.946363984827 | 1.251780195662  | -2.477156433329 |
| O  | -2.772019276599 | 4.357252583942  | -2.459912341213 |
| O  | -5.610518753935 | 3.078943009714  | -2.474238058383 |
| O  | 2.118429817536  | 3.549395792363  | 1.996274744150  |
| O  | -6.513793348206 | 6.283428505325  | -2.596809745711 |
| O  | 1.271002439210  | 6.788221917620  | 1.975047320956  |
| O  | -0.888639002114 | 4.583862927881  | 1.842860413675  |
| O  | -5.151317995307 | 5.576922672377  | -0.793072887904 |
| O  | -1.424302224075 | 3.227573142415  | -0.021706127598 |
| TV | 6.020897681839  | -0.000000000005 | -0.000000000006 |
| TV | -1.699038540778 | 6.487905003585  | 0.000000000010  |
| TV | 3.077610745964  | 2.821978112298  | 6.562818383881  |

# EQ-CO<sub>2</sub> 130

|    |                 |                 |                 |
|----|-----------------|-----------------|-----------------|
| C  | -0.027113660745 | -0.600688780929 | -0.426816055148 |
| C  | -0.573455955595 | 1.169926189844  | 2.833985303440  |
| C  | -0.099645353668 | 2.961044848837  | -0.389395791048 |
| C  | -0.768784898739 | 4.709520116683  | 2.865115851820  |
| C  | -0.212027433600 | 6.448997346477  | -0.393152805306 |
| C  | -0.707759811192 | 8.247860087238  | 2.863338083401  |
| O  | 0.152775237617  | -3.017503355765 | 3.602881342919  |
| O  | 0.083591308251  | 0.561043768821  | 3.606100513941  |
| O  | 0.639941012162  | 0.068056284735  | 0.287031796985  |
| O  | 0.561035901960  | 3.613599824267  | 0.345864207340  |
| O  | -0.754507094807 | 2.309622991868  | -1.127501941775 |
| O  | -1.419107870983 | 5.378377278798  | 2.136183058323  |
| O  | -0.688395931089 | -1.269861048299 | -1.143704173121 |
| O  | -0.123530395218 | 4.041260263549  | 3.597091002950  |
| O  | -1.235474260916 | 1.779760190056  | 2.065001967748  |
| O  | 0.441504358166  | 7.109856967635  | 0.340248222036  |
| O  | -0.859773956532 | 5.787401488299  | -1.129572746649 |
| O  | -1.369530271874 | 8.897318762000  | 2.126634910084  |
| TV | 3.528752742241  | -0.000000000000 | 0.000000000000  |
| TV | -0.204063980623 | 10.616713056192 | -0.000000000009 |
| TV | -6.268499897874 | -0.009335205665 | 7.047998107195  |

# EQ-CO<sub>2</sub> 131

|    |                 |                 |                 |
|----|-----------------|-----------------|-----------------|
| C  | -1.140588749167 | -0.985761350230 | 0.406054605673  |
| C  | 0.390907055285  | 1.521281347479  | 2.131175072880  |
| C  | -3.291662817732 | -0.942769970781 | 3.804177492207  |
| C  | -1.724949543241 | 1.566721550987  | 5.513773445412  |
| C  | -5.455979927906 | -0.897141775407 | 7.117592259107  |
| C  | -3.937241521788 | 1.611249539470  | 8.833954974797  |
| O  | 1.550457929846  | -3.444744674393 | 2.199960086988  |
| O  | -0.563034057407 | -3.400065780779 | 5.510492150445  |
| O  | 0.042373844187  | -0.984530253575 | 0.339807226342  |
| O  | -2.107259133197 | -0.939134824362 | 3.801796452338  |
| O  | -4.476193769874 | -0.946205809459 | 3.801313356441  |
| O  | -2.909507699226 | 1.563543954034  | 5.516985921965  |
| O  | -2.323781600254 | -0.987515713116 | 0.472349308334  |
| O  | -2.775755878000 | -3.355314627538 | 8.832208450056  |
| O  | -0.791805887888 | 1.517160739638  | 2.060792872951  |
| O  | -4.271397304579 | -0.893428626554 | 7.119588263764  |
| O  | -6.640630015913 | -0.901206735973 | 7.112109992609  |
| O  | -5.121811006258 | 1.607735881908  | 8.834234720356  |
| TV | 5.218886841047  | 0.000000000000  | 0.000000000008  |
| TV | 0.023175342063  | 4.969667109823  | 0.000000000010  |
| TV | -6.423297296619 | 0.133600359703  | 10.086126015746 |

# EQ-CO<sub>2</sub> 132

|    |                 |                 |                 |
|----|-----------------|-----------------|-----------------|
| C  | -1.727492198004 | -0.946187208674 | -0.001193793836 |
| C  | 1.397145249325  | 1.637985685353  | 2.308110234576  |
| C  | -3.592236966160 | 0.018501466419  | 2.853212119347  |
| C  | -0.467548408972 | 2.602444756385  | 5.162604341411  |
| C  | -5.456940465284 | 0.983258407759  | 5.707296943884  |
| C  | -2.332641584135 | 3.567959903075  | 8.016713395173  |
| O  | 1.602165649949  | -1.410321507565 | 2.098624506228  |
| O  | -0.262599619730 | -0.445780003723 | 4.952923291969  |
| O  | -0.614078514799 | -0.570238251644 | -0.152958216512 |
| O  | -2.478891530827 | 0.394625072871  | 2.701329233752  |
| O  | -4.704449164351 | -0.358376730385 | 3.000965878859  |
| O  | -1.558710608922 | 2.191733161443  | 5.374411749420  |
| O  | -2.839691421197 | -1.323058369221 | 0.146644513253  |
| O  | -2.127708637771 | 0.519868133724  | 7.807189826497  |
| O  | 0.306017951639  | 1.227176438730  | 2.519935542533  |
| O  | -4.343611499202 | 1.359506006170  | 5.555567268212  |
| O  | -6.569192255281 | 0.606471095367  | 5.855112493296  |
| O  | -3.423751023842 | 3.156996190864  | 8.228427653431  |
| TV | 8.861157464031  | -0.000000000013 | -0.000000000000 |
| TV | 0.885411011101  | 3.458742638205  | 0.000000000015  |
| TV | -5.594593813301 | 2.894866577038  | 8.562727422520  |

# EQ-CO<sub>2</sub> 133

|   |                 |                 |                 |
|---|-----------------|-----------------|-----------------|
| C | 2.525323492993  | 2.095130973107  | 1.970389024506  |
| C | -1.486502948393 | 0.406270235304  | 1.104507504693  |
| C | -5.223489954511 | 3.208647087237  | -1.169094044679 |
| C | 2.697080231570  | 5.505976004208  | 1.970053023646  |
| C | -1.315292355605 | 3.816966667648  | 1.104543711286  |
| C | -5.051406100793 | 6.619073433909  | -1.169274258599 |
| O | -0.799445744733 | -0.214501288234 | 1.842762234489  |
| O | 0.382965744394  | 0.051332529129  | -1.044810249767 |
| O | -2.179799102500 | 1.028439111833  | 0.375067686811  |



|    |                 |                 |                 |
|----|-----------------|-----------------|-----------------|
| O  | -1.785828001017 | 1.077508086056  | -2.694362139746 |
| O  | -1.613806768129 | 4.488321190304  | -2.694939594536 |
| O  | -4.073667654922 | 2.953711575626  | -1.294576759510 |
| O  | 1.789919922675  | 1.531492855897  | 1.232172751922  |
| O  | -3.901510000830 | 6.364215953143  | -1.294215656553 |
| O  | 1.961474221349  | 4.942479020991  | 1.231939040142  |
| O  | -0.628152871930 | 3.196534284684  | 1.842994465587  |
| O  | 0.554114875486  | 3.462369076374  | -1.044024305940 |
| O  | -2.008715488938 | 4.438783963756  | 0.374952684772  |
| TV | 6.926566330009  | -0.000000000009 | 0.000000000002  |
| TV | 0.343155644478  | 6.821477361030  | -0.000000000002 |
| TV | 5.051963084302  | 1.583057281135  | 5.393080540650  |

# EQ-CO<sub>2</sub> 134

|    |                 |                |                 |
|----|-----------------|----------------|-----------------|
| C  | 1.221893333404  | 2.327847131342 | 3.231658057737  |
| C  | -1.218523738574 | 0.455824087014 | 0.833301377803  |
| C  | -3.671468377699 | 2.322853567128 | -1.545219568993 |
| C  | 1.192334418536  | 6.009535148352 | 3.231175242851  |
| C  | -1.247775029274 | 4.137663385702 | 0.833268515315  |
| C  | -3.700579058700 | 6.004711106149 | -1.545390595778 |
| O  | -0.522578684634 | 0.413775065037 | 1.788677006881  |
| O  | -3.035660788203 | 2.297815321976 | -2.544586737082 |
| O  | -1.914710884210 | 0.497320397609 | -0.122146933675 |
| O  | -0.660677357235 | 0.494864350765 | -3.008882158952 |
| O  | -0.689616869357 | 4.176540225661 | -3.008959435253 |
| O  | -4.314191617540 | 2.350648673479 | -0.552946202598 |
| O  | 1.865683003253  | 2.224837147364 | 2.245251226971  |
| O  | -4.343440279351 | 6.032686172621 | -0.553214690259 |
| O  | 1.835428980012  | 5.906587499192 | 2.244296770682  |
| O  | -0.551748660775 | 4.095584548693 | 1.788589845094  |
| O  | -3.064708450915 | 5.979519726632 | -2.544707269343 |
| O  | -1.943970002441 | 4.179216594036 | -0.122176255813 |
| TV | 4.846053500672  | 0.000000000003 | -0.000000000002 |
| TV | -0.058245077128 | 7.363615606427 | 0.000000000002  |
| TV | 1.245069327231  | 1.933746612807 | 7.234326721274  |

# EQ-CO<sub>2</sub> 135

|    |                 |                 |                 |
|----|-----------------|-----------------|-----------------|
| C  | -0.579864741579 | 1.453226931849  | -1.136440815691 |
| C  | -1.009372469734 | -1.231585612116 | 0.731028291790  |
| C  | 2.940875332974  | 0.480185329879  | 0.578196689146  |
| C  | -2.095525171895 | 7.166991440388  | -0.986429540335 |
| C  | -2.552124589368 | 4.360684686073  | 0.576500987219  |
| C  | 1.394715693289  | 6.108882584265  | 0.725788365065  |
| O  | -0.273501452809 | -1.441888285657 | -0.173310070917 |
| O  | -1.741734050937 | -0.995850449654 | 1.629187601133  |
| O  | 2.437853252289  | -0.567840666385 | 0.352669729760  |
| O  | -3.608060057715 | 1.528081308152  | 0.807314639820  |
| O  | -5.139167714919 | 7.147890387539  | 0.961165722101  |
| O  | -1.660336304104 | 1.086061646769  | -1.461289444385 |
| O  | 0.501248437922  | 1.799029724133  | -0.805545932389 |
| O  | -3.189690964647 | 6.856026048886  | -1.319282511830 |
| O  | -1.000910416186 | 7.455039228115  | -0.645564882308 |
| O  | -1.814681552801 | 4.217122041807  | -0.339750852409 |
| O  | -3.287583478286 | 4.530381883064  | 1.487075192326  |
| O  | 0.878336342881  | 5.070013129187  | 0.492110723106  |
| TV | 7.047526068945  | -0.000000000022 | 0.000000000001  |
| TV | -3.145784061728 | 11.164977359818 | 0.000000000023  |

|                          |                 |                 |                 |
|--------------------------|-----------------|-----------------|-----------------|
| TV                       | 0.940614419367  | 1.153329288815  | 3.290293020009  |
| # EQ-CO <sub>2</sub> 136 |                 |                 |                 |
| C                        | 1.678685362166  | 2.086421945917  | 2.933558818860  |
| C                        | 0.183173483604  | -1.089643239112 | 0.690747760425  |
| C                        | -5.804467781579 | 4.035164492786  | -1.321266761479 |
| C                        | 0.032641315172  | 5.473676972062  | 2.955631068379  |
| C                        | -1.515628464685 | 2.208884159914  | 0.706091548768  |
| C                        | -7.516695799806 | 7.534837170906  | -1.497682550199 |
| O                        | 0.904036894686  | -1.456820538734 | 1.553745261895  |
| O                        | -5.426289320553 | 3.418861096303  | -0.382903815263 |
| O                        | -0.529125195748 | -0.714838005735 | -0.178071163337 |
| O                        | -1.347200185852 | 0.839219770281  | -2.512593106801 |
| O                        | -2.990475928119 | 4.224790707795  | -2.487993199813 |
| O                        | -6.202096376088 | 4.643597013869  | -2.255666316617 |
| O                        | 2.261147096942  | 1.583734544976  | 2.034382621364  |
| O                        | -7.836329388134 | 8.127820622547  | -2.472623098468 |
| O                        | 0.610328275148  | 4.969855756485  | 2.053261518173  |
| O                        | -0.847985954141 | 1.747942775466  | 1.567147922686  |
| O                        | -7.218617503760 | 6.933052847440  | -0.523191496056 |
| O                        | -2.175988856230 | 2.674926529651  | -0.159436141779 |
| TV                       | 6.317259072087  | -0.000000000007 | 0.000000000033  |
| TV                       | -3.325889399187 | 6.749067913270  | 0.000000000042  |
| TV                       | 2.450545273184  | 1.748848135551  | 6.350757112892  |

|                          |                 |                 |                 |
|--------------------------|-----------------|-----------------|-----------------|
| # EQ-CO <sub>2</sub> 137 |                 |                 |                 |
| C                        | 1.657996287571  | 1.971573939444  | 3.008047687330  |
| C                        | 0.175478302787  | -1.265042188465 | 0.705629927939  |
| C                        | -5.829442091779 | 4.303168315737  | -1.509641149504 |
| C                        | -0.015205049529 | 5.368708079744  | 2.970354434435  |
| C                        | -1.528720253561 | 2.199741224671  | 0.677702915368  |
| C                        | -7.486851541032 | 7.717293720467  | -1.501750127340 |
| O                        | 0.958871242342  | -1.662915974207 | 1.496911043042  |
| O                        | -5.627424676943 | 3.574852078810  | -0.599801694077 |
| O                        | -0.605252392627 | -0.864876145041 | -0.087682164099 |
| O                        | -1.213715140978 | 0.965798531031  | -2.253543007933 |
| O                        | -2.899308667892 | 4.367398692947  | -2.302328037895 |
| O                        | -6.048812161655 | 5.021380530090  | -2.426369025247 |
| O                        | 2.175185279511  | 1.405787901508  | 2.106186839332  |
| O                        | -7.707812783931 | 8.424053240214  | -2.427166496311 |
| O                        | 0.511384692975  | 4.798204082164  | 2.076750325060  |
| O                        | -0.732086166932 | 1.710163249095  | 1.402080794870  |
| O                        | -7.283470111365 | 6.999374540367  | -0.583693871899 |
| O                        | -2.323313970961 | 2.693468246307  | -0.048549522266 |
| TV                       | 6.324228049505  | -0.000000000007 | 0.000000000034  |
| TV                       | -3.333498930396 | 6.824173091822  | 0.000000000046  |
| TV                       | 2.367315458852  | 1.571817654196  | 6.172089203655  |

|                          |                 |                 |                 |
|--------------------------|-----------------|-----------------|-----------------|
| # EQ-CO <sub>2</sub> 138 |                 |                 |                 |
| C                        | -0.812130773221 | 0.520421153202  | -0.978201237884 |
| C                        | -2.135907409063 | 3.619874295589  | 2.043154588813  |
| C                        | -0.057803847447 | 0.597115758806  | 2.273618868195  |
| C                        | -1.071565050282 | 3.716676419354  | 5.275161299760  |
| C                        | 1.026823080819  | 0.690170653048  | 5.447658424968  |
| C                        | -0.118602935309 | 3.793070643535  | 8.515472887672  |
| O                        | -1.744014378402 | -0.133681861609 | -1.298941472631 |
| O                        | -1.017355816195 | -0.070304991409 | 2.092432858356  |

|    |                 |                 |                 |
|----|-----------------|-----------------|-----------------|
| O  | 0.546955450838  | -1.930044851083 | -0.475988602996 |
| O  | 1.349689542964  | -1.877391697494 | 2.784331782749  |
| O  | -0.397304391898 | 3.090187066893  | 4.530214286755  |
| O  | 1.975823596855  | 1.353063938072  | 5.689149949554  |
| O  | -1.441178100102 | 3.011862447447  | 1.300841458057  |
| O  | 0.076697880696  | 0.028980887458  | 5.202991426185  |
| O  | 0.899678279151  | 1.266306114057  | 2.453145118824  |
| O  | 2.433264468599  | -1.762309994098 | 6.019668789701  |
| O  | 0.566609570101  | 3.168832159934  | 7.778196349126  |
| O  | 2.947871407622  | 1.416050642082  | 9.072325846557  |
| TV | 4.567385629080  | 0.000000000000  | -0.000000000001 |
| TV | 0.387030565713  | 6.104105314455  | 0.000000000001  |
| TV | 2.827721719550  | 0.242406197513  | 9.726817451589  |

# EQ-CO<sub>2</sub> 139

|    |                 |                 |                 |
|----|-----------------|-----------------|-----------------|
| C  | -1.022562980192 | 0.627566013783  | -1.203497492848 |
| C  | -2.121543100159 | 4.036866197770  | 2.019638434362  |
| C  | -0.012264172994 | 1.002774834406  | 2.020421646278  |
| C  | -1.111443653749 | 4.412313315957  | 5.243667392879  |
| C  | 0.998096743605  | 1.378093761529  | 5.244393959779  |
| C  | -0.101018989493 | 4.787714894017  | 8.467627507975  |
| O  | -1.945596437892 | -0.076098718821 | -1.432851557785 |
| O  | -0.935253748153 | 0.299058808331  | 1.791068374151  |
| O  | 0.404887031638  | -1.785135338852 | -0.470961126100 |
| O  | 1.415241492791  | -1.409902458262 | 2.753092232047  |
| O  | -0.426997258009 | 3.783765595843  | 4.509828742894  |
| O  | 1.921330570848  | 2.081383929006  | 5.473591698464  |
| O  | -1.437142357693 | 3.408368486622  | 1.285695819895  |
| O  | 0.075081057231  | 0.674439875478  | 5.014948243417  |
| O  | 0.910895106599  | 1.706174058390  | 2.249579391683  |
| O  | 2.425341951152  | -1.034485856861 | 5.977134091424  |
| O  | 0.583263227480  | 4.159071519867  | 7.733700332647  |
| O  | 2.931652281722  | 2.457135967632  | 8.697724626732  |
| TV | 4.640363711435  | -0.000000000000 | -0.000000000001 |
| TV | 0.419351583756  | 6.075852634234  | 0.000000000001  |
| TV | 3.031022319311  | 1.126218106632  | 9.672052698571  |

# EQ-CO<sub>2</sub> 140

|    |                 |                 |                 |
|----|-----------------|-----------------|-----------------|
| C  | -0.924120139632 | 0.696749791304  | -0.994125394815 |
| C  | -2.141925061773 | 3.864097936344  | 1.918759002333  |
| C  | -0.091732753411 | 0.768292747512  | 2.318988703271  |
| C  | -1.309524434067 | 3.935685553519  | 5.231876386902  |
| C  | 0.740547450539  | 0.839932208965  | 5.632020384132  |
| C  | -0.477155522169 | 4.007246568769  | 8.544918147269  |
| O  | -1.824634318149 | 0.007805307371  | -1.331903538803 |
| O  | -0.992289271463 | 0.079409260899  | 1.981199331700  |
| O  | 0.372361485189  | -1.896284654551 | -0.649019586937 |
| O  | 1.204671157141  | -1.824852841032 | 2.664038220427  |
| O  | -0.636932184676 | 3.309965467555  | 4.484168589353  |
| O  | 1.639992416875  | 1.530008859389  | 5.970234206402  |
| O  | -1.469258807711 | 3.238458593871  | 1.171054041383  |
| O  | -0.159971379679 | 0.151007482624  | 5.294220340590  |
| O  | 0.807716577891  | 1.458381287106  | 2.657177225182  |
| O  | 2.037119378575  | -1.753165288940 | 5.977128077012  |
| O  | 0.195407727651  | 3.381489100938  | 7.797220378372  |
| O  | 2.472422178432  | 1.601564737974  | 9.283254743488  |
| TV | 4.305051591364  | 0.000000000000  | -0.000000000001 |

|    |                |                |                |
|----|----------------|----------------|----------------|
| TV | 0.283885122745 | 6.313292168491 | 0.000000000001 |
| TV | 2.497127175206 | 0.214674236005 | 9.939192231331 |

# EQ-CO<sub>2</sub> 141

|    |                 |                 |                 |
|----|-----------------|-----------------|-----------------|
| C  | -1.293012837988 | -1.008343623647 | 0.493963494521  |
| C  | 0.288223886970  | 1.424278687864  | 2.199229226562  |
| C  | -3.346091652572 | -1.104484244187 | 3.893092200736  |
| C  | -1.813591306980 | 1.332467181454  | 5.598917353336  |
| C  | -5.542422843596 | -1.196553110748 | 7.373746399976  |
| C  | -4.017037174988 | 1.234682747360  | 9.150591909054  |
| O  | 1.408370398762  | -3.550792862034 | 2.261490916320  |
| O  | -0.693545535636 | -3.641503584192 | 5.666473014718  |
| O  | -0.108715165991 | -1.014294401631 | 0.486493470675  |
| O  | -2.161180685474 | -1.114247836974 | 3.888355857176  |
| O  | -4.530325550919 | -1.094332207194 | 3.896638034800  |
| O  | -2.996080366919 | 1.346007707036  | 5.527061926323  |
| O  | -2.477767365810 | -1.001804730875 | 0.498395332129  |
| O  | -2.896967818240 | -3.740153384249 | 9.218567513859  |
| O  | -0.894324744541 | 1.438641898659  | 2.131873348893  |
| O  | -4.359980546713 | -1.212099025196 | 7.447611036417  |
| O  | -6.724495505966 | -1.181105453650 | 7.294978431073  |
| O  | -5.199291021037 | 1.248724341356  | 9.076904474238  |
| TV | 5.189989156752  | 0.000000000000  | 0.000000000008  |
| TV | 0.062723417573  | 4.960461163448  | 0.000000000011  |
| TV | -6.405186966911 | -0.279965358484 | 10.352768829582 |

# EQ-CO<sub>2</sub> 142

|    |                 |                 |                 |
|----|-----------------|-----------------|-----------------|
| C  | 1.754373219957  | 1.872064026784  | 3.104996632551  |
| C  | -0.085103963418 | -1.103852220739 | 0.765024257938  |
| C  | -5.403914645419 | 4.419082314394  | -1.572262746438 |
| C  | 0.467820108855  | 5.232845053226  | 3.135792785556  |
| C  | -1.428497525021 | 2.250051163517  | 0.691383375087  |
| C  | -6.708716547568 | 7.761506610276  | -1.583427626211 |
| O  | 0.709590853211  | -1.502945481217 | 1.545112356992  |
| O  | -5.385179329927 | 3.705142062223  | -0.628669106495 |
| O  | -0.880807702450 | -0.704058584686 | -0.014319058889 |
| O  | -1.095959897516 | 0.972872541237  | -2.396417380880 |
| O  | -2.409837092467 | 4.349814953885  | -2.388695799094 |
| O  | -5.442470465839 | 5.120793552791  | -2.526999271450 |
| O  | 2.216760138516  | 1.335690635093  | 2.156709680290  |
| O  | -6.744809967982 | 8.459271937985  | -2.541209329821 |
| O  | 0.961336523549  | 4.680736276604  | 2.213160254627  |
| O  | -0.631990946228 | 1.844027039337  | 1.465238620484  |
| O  | -6.690290363564 | 7.052647475019  | -0.636070418866 |
| O  | -2.222655392909 | 2.657941173743  | -0.086208354936 |
| TV | 6.141727948601  | -0.000000000009 | -0.000000000003 |
| TV | -2.598684104635 | 6.700068982523  | 0.000000000000  |
| TV | 2.403033912140  | 1.436709698939  | 6.457701362669  |

# EQ-CO<sub>2</sub> 143

|   |                 |                 |                 |
|---|-----------------|-----------------|-----------------|
| C | 1.607924361624  | 2.042935666106  | 2.898537094215  |
| C | 0.093387910297  | -1.100583360148 | 0.687193513463  |
| C | -5.916128311672 | 4.065498061714  | -1.357853304721 |
| C | -0.127188429404 | 5.435327622918  | 2.897605044278  |
| C | -1.630191016918 | 2.286705108105  | 0.693688497542  |
| C | -7.628582577165 | 7.519539144930  | -1.433276330299 |
| O | 0.876133542064  | -1.494494086141 | 1.481497435750  |

|    |                 |                 |                 |
|----|-----------------|-----------------|-----------------|
| O  | -5.564329258713 | 3.428671543982  | -0.424619504144 |
| O  | -0.684426895061 | -0.699435601964 | -0.110446523976 |
| O  | -1.259235801752 | 0.913876801019  | -2.408273640881 |
| O  | -2.991774682436 | 4.306905253500  | -2.408122003338 |
| O  | -6.292475513207 | 4.689416580774  | -2.291682894549 |
| O  | 2.213265002065  | 1.550975783145  | 2.007504480110  |
| O  | -7.938302919779 | 8.217671190457  | -2.339361548781 |
| O  | 0.476525553142  | 4.944784680154  | 2.004689685672  |
| O  | -0.848381087436 | 1.892153021937  | 1.488423902121  |
| O  | -7.339035198464 | 6.813346948595  | -0.528427618125 |
| O  | -2.405178204045 | 2.689052831367  | -0.106072913276 |
| TV | 6.419527087612  | -0.000000000007 | 0.000000000035  |
| TV | -3.450486190397 | 6.782265082428  | 0.000000000040  |
| TV | 2.270760796660  | 1.616945609436  | 6.206298098351  |

# EQ-CO<sub>2</sub> 144

|    |                 |                 |                 |
|----|-----------------|-----------------|-----------------|
| C  | 1.977849518785  | 1.655498821897  | 3.158556348197  |
| C  | -0.051528936827 | -1.122056676104 | 0.736249906444  |
| C  | -5.150774004006 | 4.572870897955  | -1.618311090502 |
| C  | 0.868203440162  | 5.027125557497  | 3.165522628793  |
| C  | -1.221066205523 | 2.241076345669  | 0.765167510410  |
| C  | -6.273434207126 | 7.950698721106  | -1.617459123053 |
| O  | 0.782284934912  | -1.537899399144 | 1.465120186368  |
| O  | -5.165024401315 | 3.906263641687  | -0.641553591701 |
| O  | -0.881600461449 | -0.704814278438 | 0.002605673555  |
| O  | -1.043715463406 | 0.880805413181  | -2.431229035731 |
| O  | -2.164454265715 | 4.254878587997  | -2.431428747019 |
| O  | -5.157685236017 | 5.228022595493  | -2.606277495770 |
| O  | 2.489698421859  | 1.134009946579  | 2.227739517533  |
| O  | -6.283412148773 | 8.616215333758  | -2.598002638296 |
| O  | 1.390305517109  | 4.502795714422  | 2.242357910919  |
| O  | -0.436160256528 | 1.823105754696  | 1.545085031716  |
| O  | -6.284685693926 | 7.274219608290  | -0.647405948479 |
| O  | -2.007565271570 | 2.660733081233  | -0.013598172957 |
| TV | 5.993869038174  | -0.000000000008 | -0.000000000003 |
| TV | -2.240740026059 | 6.740408404369  | -0.000000000000 |
| TV | 2.533910196230  | 1.296093714372  | 6.534881405125  |

# EQ-CO<sub>2</sub> 145

|   |                 |                 |                 |
|---|-----------------|-----------------|-----------------|
| C | 0.554765358771  | -0.601426931243 | -0.193995531471 |
| C | -0.790961413689 | 1.447189342099  | 2.697287088525  |
| C | 3.973153202436  | -0.533982234415 | -0.186988019747 |
| C | 2.567614458899  | 1.549330927586  | 2.700012211291  |
| C | 7.353390854758  | -0.560966431718 | -0.187024491180 |
| C | 5.987601403434  | 1.526568995826  | 2.627211811261  |
| O | -3.460259567909 | -4.055738706072 | 2.262327465961  |
| O | 0.051899246009  | -4.034131862884 | 2.265266906870  |
| O | 1.177196567582  | -1.474788274121 | 0.307360547202  |
| O | 4.476155999442  | -1.484644029542 | 0.305408591845  |
| O | 3.468104018314  | 0.418402531315  | -0.676112344204 |
| O | 2.991667173061  | 2.567683562658  | 3.128554581356  |
| O | -0.075967787759 | 0.272047195282  | -0.686681179218 |
| O | 3.438584035148  | -4.008977318027 | 2.121877173616  |
| O | -0.208421027284 | 2.381370334333  | 3.131908953484  |
| O | 7.741146769927  | -1.558611914957 | 0.316143899651  |
| O | 6.959240739583  | 0.436978120155  | -0.685339520076 |
| O | 6.443931617890  | 2.497008677996  | 3.128517596783  |

|    |                 |                 |                 |
|----|-----------------|-----------------|-----------------|
| TV | 10.274195131911 | 0.000000000030  | 0.000000000054  |
| TV | 2.086135441812  | 4.568946258054  | -0.000000000041 |
| TV | -3.748533225699 | -0.321928253974 | 5.883587960989  |

# EQ-CO<sub>2</sub> 146

|    |                 |                 |                 |
|----|-----------------|-----------------|-----------------|
| C  | 1.949618853408  | 1.483991028666  | 3.129376886040  |
| C  | -0.111201860139 | -1.378621927671 | 0.730978822815  |
| C  | -5.426515282836 | 4.421782544051  | -1.597228656887 |
| C  | 0.728035359019  | 4.836681027499  | 3.129139520174  |
| C  | -1.332398884780 | 1.973345935144  | 0.730985913335  |
| C  | -6.646508379769 | 7.772109262745  | -1.597067744398 |
| O  | 0.745007026481  | -1.761813933777 | 1.451828518332  |
| O  | -5.530955544141 | 3.704255822099  | -0.663476263229 |
| O  | -0.969804053193 | -0.995971568463 | 0.011973506015  |
| O  | -1.039306205949 | 0.913773651572  | -2.331868655241 |
| O  | -2.260386479872 | 4.265725691999  | -2.331432758595 |
| O  | -5.342378852032 | 5.128419837535  | -2.544728640306 |
| O  | 2.408075097139  | 0.926668681642  | 2.191715077910  |
| O  | -6.562443856733 | 8.479041633668  | -2.544338845479 |
| O  | 1.186142443838  | 4.280016730969  | 2.190920775478  |
| O  | -0.476055565526 | 1.590271653187  | 1.451723387687  |
| O  | -6.751222611247 | 7.054724377763  | -0.663213856164 |
| O  | -2.191189279954 | 2.356162907262  | 0.012323503363  |
| TV | 6.158453600229  | -0.000000000016 | 0.000000000076  |
| TV | -2.442686899013 | 6.704720866915  | 0.000000000153  |
| TV | 2.559355252466  | 1.130691432967  | 6.412916429981  |

# EQ-CO<sub>2</sub> 147

|    |                 |                 |                 |
|----|-----------------|-----------------|-----------------|
| C  | 6.470849734329  | -1.279592396859 | 0.733740903602  |
| C  | 0.398834457446  | -1.507501940625 | -1.079610434154 |
| C  | -2.302298260159 | -2.181013192415 | 1.740390561017  |
| C  | 8.000674551043  | -2.450228304756 | 3.699985520819  |
| C  | 1.928693423898  | -2.678158658566 | 1.886645546150  |
| C  | -0.772456729945 | -3.351673356339 | 4.706654326389  |
| O  | -2.318004552852 | -2.929489524267 | 0.823826290840  |
| O  | 5.333281317084  | -1.499619252754 | 0.487930121223  |
| O  | -0.739406779933 | -1.713631308103 | -1.331046043655 |
| O  | 1.538441952759  | -1.305865571545 | -0.828908759497 |
| O  | 3.068301458129  | -2.476525905466 | 2.137344277522  |
| O  | 7.608020741954  | -1.058457460679 | 0.980056734979  |
| O  | -2.298361229235 | -1.427057176321 | 2.653599150265  |
| O  | 9.137850334717  | -2.229139549254 | 3.946309959612  |
| O  | -0.768520768994 | -2.597711142965 | 5.619856581783  |
| O  | -0.788155250438 | -4.100143385056 | 3.790087856837  |
| O  | 6.863100154170  | -2.670232878936 | 3.454169951107  |
| O  | 0.790446155180  | -2.884280645663 | 1.635214123846  |
| TV | 14.027447245667 | -0.000000000002 | 0.000000000014  |
| TV | 1.499987735474  | 3.275229976820  | -0.000000000004 |
| TV | 3.059698022787  | -2.341342747558 | 5.932503482102  |

# EQ-CO<sub>2</sub> 148

|   |                 |                |                 |
|---|-----------------|----------------|-----------------|
| C | 1.802284790764  | 2.033236008536 | 2.439225679679  |
| C | -1.758742777162 | 0.587857095068 | 1.123408972729  |
| C | -4.747741703452 | 3.434476569661 | -1.362127710092 |
| C | 2.263993274450  | 5.515906582651 | 2.497097565900  |
| C | -1.510176012204 | 4.286814398455 | 0.911724520145  |
| C | -4.196400377967 | 6.972303679626 | -1.335640550434 |

|    |                 |                 |                 |
|----|-----------------|-----------------|-----------------|
| O  | -1.360655098052 | -0.132997577660 | 1.976369935005  |
| O  | 0.258553151724  | -0.509257186654 | -0.750886741370 |
| O  | -2.184162679617 | 1.305574420557  | 0.284867128193  |
| O  | -1.280363098992 | 1.308692641461  | -2.737360403445 |
| O  | -0.995840308297 | 5.082866484340  | -2.739783999053 |
| O  | -3.713093807424 | 3.784624045719  | -1.815915753843 |
| O  | 1.137866847649  | 1.636879939921  | 1.541868429907  |
| O  | -3.321763619376 | 7.513310165665  | -1.921070812581 |
| O  | 1.789209422460  | 4.830727069609  | 1.656045841614  |
| O  | -1.181771811600 | 3.590664676107  | 1.812107157625  |
| O  | 0.425865405474  | 3.082174032176  | -0.907714529942 |
| O  | -1.862794328415 | 4.995880272871  | 0.030924140459  |
| TV | 6.208907669770  | -0.000000000004 | -0.000000000004 |
| TV | 0.879137048705  | 6.938941017553  | 0.000000000008  |
| TV | 3.767828860494  | 1.116066021231  | 6.059646601473  |

# EQ-CO<sub>2</sub> 149

|    |                 |                 |                 |
|----|-----------------|-----------------|-----------------|
| C  | -1.834942951439 | -0.470653387913 | 0.538489392912  |
| C  | 1.936919071304  | 2.031746066735  | 2.031868784986  |
| C  | 0.563036633788  | -0.438910381473 | 3.784267631323  |
| C  | 4.338029738359  | 2.070300078708  | 5.285849559322  |
| C  | 3.081064704563  | -0.410338779224 | 7.108428553820  |
| C  | 6.811053486001  | 2.101095413119  | 8.727837245228  |
| O  | 0.720277786403  | -2.959819458494 | 2.028879777120  |
| O  | 3.121102063287  | -2.921809223846 | 5.280631541773  |
| O  | -0.652974885275 | -0.440275258749 | 0.605958668975  |
| O  | 1.745338026201  | -0.411243921751 | 3.852288954759  |
| O  | -0.619060330096 | -0.470811434969 | 3.716619684946  |
| O  | 3.153653154282  | 2.030113565138  | 5.285566350557  |
| O  | -3.017111453291 | -0.502757590607 | 0.469870116819  |
| O  | 5.592422090217  | -2.906529208127 | 8.799257611136  |
| O  | 0.753258280656  | 1.992251934404  | 2.030602485015  |
| O  | 4.266024002342  | -0.389098480025 | 7.103486064883  |
| O  | 1.896718398576  | -0.434773427031 | 7.111346701117  |
| O  | 5.628750609319  | 2.078714128978  | 8.656172451567  |
| TV | 5.206613496167  | -0.000000000000 | 0.000000000001  |
| TV | 2.400694702758  | 5.033676463166  | -0.000000000002 |
| TV | 7.298751801253  | 0.101146739756  | 9.887067317974  |

# EQ-CO<sub>2</sub> 150

|   |                 |                 |                |
|---|-----------------|-----------------|----------------|
| C | -1.192522956230 | -1.079801096041 | 0.343475704846 |
| C | 0.266954193265  | 1.316211033705  | 2.207985116292 |
| C | -3.611443316323 | -1.164750710261 | 3.943516345365 |
| C | -2.070073729917 | 1.238593657038  | 5.659784944461 |
| C | -5.948505598864 | -1.242162809465 | 7.388526807762 |
| C | -4.408556703671 | 1.162092639802  | 9.104476039948 |
| O | 1.329118021718  | -3.568686857678 | 2.287883851702 |
| O | -1.007782753304 | -3.643816152821 | 5.734275320943 |
| O | -0.008093783484 | -1.107638949343 | 0.349092142141 |
| O | -2.426665959540 | -1.197553559414 | 3.942392015681 |
| O | -4.796018402639 | -1.134066003457 | 3.940084455043 |
| O | -3.252315674410 | 1.250877033604  | 5.586715445949 |
| O | -2.377087166124 | -1.052808995692 | 0.333553073984 |
| O | -3.346143163886 | -3.720333797626 | 9.181278377599 |
| O | -0.915108246188 | 1.331105431161  | 2.129884535994 |
| O | -4.763652267422 | -1.274864665921 | 7.387215719019 |
| O | -7.132913573331 | -1.211340704297 | 7.385957124118 |

|    |                 |                 |                 |
|----|-----------------|-----------------|-----------------|
| O  | -5.590584594016 | 1.174222575124  | 9.030093273925  |
| TV | 5.246532135507  | -0.000000000000 | 0.000000000008  |
| TV | 0.119907070247  | 4.870756215707  | 0.000000000011  |
| TV | -7.121462058619 | -0.236556261648 | 10.498177408606 |

# EQ-CO<sub>2</sub> 151

|    |                 |                 |                 |
|----|-----------------|-----------------|-----------------|
| C  | 1.853383606084  | 1.547459683822  | 1.731672610860  |
| C  | -1.941718220718 | 0.604490387702  | 0.474172499844  |
| C  | -3.763078336195 | 3.056447743909  | -0.898483498625 |
| C  | 3.015863564495  | 0.970327785137  | 5.676541071886  |
| C  | -0.755907192247 | 0.081637320455  | 4.367193944137  |
| C  | -2.620351583851 | 2.455876684702  | 3.037528419322  |
| O  | -2.535369888159 | 0.001292626870  | 1.304288377481  |
| O  | -3.254423413012 | 3.691169278026  | -1.759767015395 |
| O  | -1.349376572616 | 1.213906522871  | -0.348918063680 |
| O  | 1.169178158478  | 2.792345367219  | -1.373096490553 |
| O  | 2.344247667981  | 2.216700532173  | 2.574476576872  |
| O  | -4.272793925445 | 2.419222306230  | -0.041691291113 |
| O  | 1.362627243198  | 0.879428029468  | 0.889186648993  |
| O  | -3.112766088941 | 1.825856052829  | 3.910133260079  |
| O  | 2.520441820308  | 0.293097293864  | 4.843429272956  |
| O  | -1.300993783105 | -0.488935253941 | 5.250817014832  |
| O  | -2.126426033763 | 3.080736891060  | 2.160775840291  |
| O  | -0.210977610302 | 0.658113793007  | 3.489149753323  |
| TV | 8.173946331338  | 0.000000000000  | 0.000000000000  |
| TV | 2.972924660228  | 4.323515027257  | -0.000000000001 |
| TV | 2.342819935201  | -1.142713508912 | 7.880827455000  |

# EQ-CO<sub>2</sub> 152

|    |                 |                 |                |
|----|-----------------|-----------------|----------------|
| C  | 0.047485497044  | -1.371416635770 | 0.516393141085 |
| C  | 1.708650968441  | 1.774862311877  | 2.084509070025 |
| C  | -1.617926163254 | -0.712092838865 | 3.561741354590 |
| C  | 0.963831385221  | 2.614307275318  | 5.126403867803 |
| C  | -0.752630203849 | 0.191618378296  | 6.620708850821 |
| C  | 0.193371153759  | 3.427693968524  | 8.180627535612 |
| O  | -1.649787355540 | -3.506647602151 | 2.670283183519 |
| O  | -2.404260303553 | -2.736862920263 | 5.770355210440 |
| O  | 1.192793338320  | -1.637388692448 | 0.375854476774 |
| O  | -0.457713024508 | -0.668275331670 | 3.784039116000 |
| O  | -2.781676172159 | -0.753181733127 | 3.342894962940 |
| O  | 0.035021924352  | 2.259821007787  | 4.481322270446 |
| O  | -1.097127982421 | -1.107355162044 | 0.657189873690 |
| O  | -3.178474425538 | -1.845531516771 | 8.776383951525 |
| O  | 0.775053575821  | 1.347213335634  | 1.496577291910 |
| O  | 0.420235700088  | 0.211193785286  | 6.785737217485 |
| O  | -1.923059754661 | 0.171092111553  | 6.456674078230 |
| O  | -0.739073032844 | 2.997142572637  | 7.587591461883 |
| TV | 5.025438000688  | 0.000000000103  | 0.000000000002 |
| TV | 4.297686929506  | 5.706039006370  | 0.000000000011 |
| TV | -2.230367997474 | 2.224620809287  | 9.136888977491 |

# EQ-CO<sub>2</sub> 153

|   |                 |                |                 |
|---|-----------------|----------------|-----------------|
| C | 1.369282255391  | 2.196851844542 | 1.216079524186  |
| C | -2.178394107849 | 0.515403337758 | 1.145664139236  |
| C | -3.706763804833 | 2.434693706945 | -2.167204966757 |
| C | 1.656461467772  | 5.489819819425 | 1.075764685102  |
| C | -1.880021160849 | 3.841572835412 | 1.144795754902  |



|    |                 |                 |                 |
|----|-----------------|-----------------|-----------------|
| C  | -3.402790618796 | 5.753702249521  | -2.167524080645 |
| O  | -1.821288963535 | 0.013045280341  | 2.155633429470  |
| O  | -3.236846123783 | -1.468299753194 | -2.834794118733 |
| O  | -2.537207648609 | 1.017204191910  | 0.136688734483  |
| O  | 0.433879792242  | 1.750274594248  | 0.644358401925  |
| O  | 0.736306050573  | 5.018381451197  | 0.498714869665  |
| O  | -4.491898832411 | 3.008390637491  | -1.490983989305 |
| O  | 2.302350439369  | 2.643013205627  | 1.793602482198  |
| O  | -4.183115285611 | 6.341059104345  | -1.497782849818 |
| O  | 2.576327435832  | 5.959390543884  | 1.654025624042  |
| O  | -1.528902275171 | 3.357978646837  | 2.165423644521  |
| O  | -2.923256235690 | 1.856893421854  | -2.841234708995 |
| O  | -2.234951051275 | 4.326029920267  | 0.126083483046  |
| TV | 6.794791537916  | -0.000000000008 | 0.000000000004  |
| TV | 0.612859701760  | 6.630679361204  | 0.000000000025  |
| TV | 3.636269015861  | 2.809434813223  | 6.630294028537  |

# EQ-CO<sub>2</sub> 154

|    |                 |                 |                 |
|----|-----------------|-----------------|-----------------|
| C  | 1.030331163139  | 2.419531542766  | 3.161962301294  |
| C  | -1.426784796059 | 0.527626863549  | 0.868885113086  |
| C  | -4.738912041915 | 2.380720323383  | -1.556436435832 |
| C  | -0.328994399257 | 5.453823424683  | 3.167048786676  |
| C  | -2.779259124745 | 3.565782566817  | 0.879239865368  |
| C  | -6.150102289500 | 5.403589065160  | -1.555670501369 |
| O  | -1.571885648187 | -0.107366982204 | 1.857429963219  |
| O  | -3.443309287128 | -0.114633668474 | -2.604841935068 |
| O  | -1.287686045920 | 1.160289370566  | -0.123295640967 |
| O  | -0.478565885632 | 0.907981534262  | -2.951650580900 |
| O  | -1.838913890582 | 3.943008600056  | -2.946905117479 |
| O  | -4.653069216779 | 1.839532164091  | -0.505861287936 |
| O  | 0.789368163386  | 1.716579484805  | 2.241186472826  |
| O  | -6.134738051344 | 4.860034812272  | -0.503020028934 |
| O  | -0.569530949345 | 4.750057221875  | 2.247110945489  |
| O  | -2.921863141727 | 2.926140662583  | 1.864915079860  |
| O  | -4.812850998682 | 2.926900217058  | -2.604158403708 |
| O  | -2.643833624283 | 4.202197782873  | -0.110880659236 |
| TV | 6.473284280340  | -0.000000000010 | -0.000000000002 |
| TV | -2.714460421173 | 6.067246850624  | 0.000000000001  |
| TV | 1.750316057145  | 2.214883949042  | 7.034155308949  |

# EQ-CO<sub>2</sub> 155

|   |                 |                 |                |
|---|-----------------|-----------------|----------------|
| C | -2.623838034851 | -0.403746725973 | 0.544057944706 |
| C | 1.578978604456  | 1.309397126736  | 2.101854220138 |
| C | -2.714488575238 | 2.938022067497  | 0.538474032051 |
| C | 1.501797161639  | 4.637305672093  | 2.093364306266 |
| C | -2.793445559072 | 6.279974420741  | 0.541106564975 |
| C | 1.495802995635  | 7.982078744384  | 2.149201368402 |
| O | 2.700082079295  | -1.495108679442 | 2.605330901929 |
| O | 2.557438732442  | 1.851040156670  | 2.491565175588 |
| O | -1.615904327617 | -0.900426074556 | 0.918223139611 |
| O | -1.708846186027 | 2.442615580716  | 0.920263322004 |
| O | -3.717840357119 | 3.434803102577  | 0.151936011024 |
| O | 0.514337460265  | 4.114804531440  | 1.700968469890 |
| O | -3.630285237705 | 0.092518610405  | 0.165454242583 |
| O | 2.487785265859  | 5.159220616418  | 2.489927333960 |
| O | 0.599337362681  | 0.768530853969  | 1.715245643398 |
| O | -1.784480091596 | 5.789713367450  | 0.920776237722 |

|    |                 |                 |                 |
|----|-----------------|-----------------|-----------------|
| O  | -3.800466171638 | 6.771656049034  | 0.157080849898  |
| O  | 0.534845854650  | 7.458310532100  | 1.697464868852  |
| TV | 7.224534176308  | -0.000000000000 | 0.000000000001  |
| TV | -0.246762795076 | 10.004232918715 | -0.000000000003 |
| TV | 1.566995986533  | -1.635602843997 | 3.709171716479  |

# EQ-CO<sub>2</sub> 156

|    |                 |                 |                 |
|----|-----------------|-----------------|-----------------|
| C  | 1.398170975299  | -1.623860568996 | -1.161044234361 |
| C  | -0.545787356620 | -4.132626916127 | -1.535242377927 |
| C  | 2.907319003250  | 0.542641667112  | -3.080768125405 |
| C  | 2.570607792957  | -1.463389489483 | 3.493041672901  |
| C  | 0.747545734372  | -3.791282018024 | 2.167961147956  |
| C  | 3.864044798544  | 0.359102443039  | 1.088761578156  |
| O  | -0.154110997110 | -3.785882721533 | -2.598086647646 |
| O  | 0.598604345346  | 2.282739149107  | -0.467230256677 |
| O  | 0.382258757950  | -1.110995795848 | -0.841584145841 |
| O  | 1.969133245898  | 0.082529789899  | -3.637781826782 |
| O  | 2.836645005202  | 0.252464208792  | 0.504298229547  |
| O  | 2.407494525948  | -2.142559113192 | -1.495142367002 |
| O  | -1.076223443392 | 1.006898721356  | -2.497050853829 |
| O  | 3.525209293904  | -2.073367188490 | 3.146570262076  |
| O  | -0.025989626781 | 0.473054711830  | 1.690854121899  |
| O  | 1.124549275229  | -3.049817118026 | 1.323928446272  |
| O  | 1.901156295094  | 2.231135150138  | 3.014786567575  |
| O  | 1.611329245671  | -0.859240727549 | 3.826543460526  |
| TV | 4.900254316167  | 0.000000000030  | 0.000000000007  |
| TV | 1.506607089176  | 6.766627138303  | -0.000000000002 |
| TV | 2.127137255259  | 0.624637482818  | 8.285547845074  |

# EQ-CO<sub>2</sub> 157

|    |                 |                 |                 |
|----|-----------------|-----------------|-----------------|
| C  | 6.141851354842  | -1.392702209512 | 0.838959553749  |
| C  | 1.784544870203  | -2.249614788964 | -1.819370297702 |
| C  | -4.306090154336 | -0.902269436456 | 2.534184418828  |
| C  | 6.103923201063  | -1.880825862879 | 4.203525424236  |
| C  | 1.745610340511  | -2.734098096279 | 1.544180004476  |
| C  | -4.284649364134 | -1.239262209267 | 5.890571513455  |
| O  | -3.250472695792 | -0.753454075210 | 2.017247686875  |
| O  | 5.155850000559  | -1.599967256866 | 0.216925686049  |
| O  | 0.798999114508  | -2.458767125778 | -2.441376911542 |
| O  | 2.769372722786  | -2.036715521904 | -1.196248910788 |
| O  | 2.730506160288  | -2.521239572942 | 2.167246354900  |
| O  | 7.125386417260  | -1.181758229087 | 1.462533144593  |
| O  | -5.361520452429 | -1.053301269459 | 3.051075242941  |
| O  | 7.088241459686  | -1.671565894456 | 4.826663489184  |
| O  | -5.344679392525 | -1.392338198679 | 6.396734941247  |
| O  | -3.224369476359 | -1.087694301678 | 5.383382772277  |
| O  | 5.117418630736  | -2.085799652180 | 3.581400169909  |
| O  | 0.759994204377  | -2.943317733081 | 0.922339456454  |
| TV | 14.899438622599 | 0.000000000453  | -0.000000000144 |
| TV | 1.633356190261  | 3.139771828996  | 0.000000000064  |
| TV | -0.079373727220 | -0.970306943722 | 6.725275002947  |

# EQ-CO<sub>2</sub> 158

|   |                 |                 |                |
|---|-----------------|-----------------|----------------|
| C | -0.017129056194 | -0.939789849477 | 0.474699895334 |
| C | -0.344054091342 | 1.867186033258  | 2.076414595970 |
| C | -1.784622132884 | -0.684729996630 | 3.668638239470 |
| C | -1.966746523689 | 2.120195571601  | 5.265938586633 |

|    |                 |                 |                 |
|----|-----------------|-----------------|-----------------|
| C  | -3.395002444947 | -0.437228490183 | 6.862391581443  |
| C  | -3.739325492857 | 2.373172011638  | 8.458692793111  |
| O  | -0.325510800516 | -3.793295700936 | 1.923205404194  |
| O  | -1.949691084650 | -3.546533344683 | 5.108887190977  |
| O  | 1.120671328435  | -1.232616171747 | 0.327493289826  |
| O  | -0.650234879477 | -0.987817151410 | 3.513446767120  |
| O  | -2.918720563841 | -0.382076719371 | 3.827028569133  |
| O  | -3.101068285236 | 2.423527421881  | 5.420805885120  |
| O  | -1.155745744818 | -0.650561449457 | 0.625374970093  |
| O  | -3.695773880534 | -3.165379639931 | 8.304028372963  |
| O  | -1.480773321051 | 2.163414735545  | 2.229716175412  |
| O  | -2.257570024306 | -0.731817488896 | 6.708975316372  |
| O  | -4.530253432384 | -0.138810300612 | 7.015578202202  |
| O  | -4.900035269218 | 2.548432720915  | 8.611902911221  |
| TV | 5.095443588643  | -0.000000000000 | -0.000000000005 |
| TV | 1.117429611796  | 5.364263892028  | -0.000000000004 |
| TV | -5.309667944667 | 0.753303561753  | 9.577341827202  |

# EQ-CO<sub>2</sub> 159

|    |                 |                 |                 |
|----|-----------------|-----------------|-----------------|
| C  | 1.987232710371  | 2.022493206930  | -1.426816406378 |
| C  | -3.940379359205 | -2.334876063538 | 4.361137421456  |
| C  | 5.604555852655  | 2.056361652665  | -1.366891537663 |
| C  | -0.354722672656 | -2.336922165852 | 4.364243359965  |
| C  | 9.183527152391  | 2.062188061315  | -1.367911132622 |
| C  | 3.217887974638  | -2.333367126703 | 4.343702133827  |
| O  | -4.194597103284 | -6.552742674973 | 3.638121539548  |
| O  | -0.608744426771 | -6.553801866312 | 3.640104918121  |
| O  | 2.632303617441  | 2.735738320896  | -2.116841705955 |
| O  | 6.211251889137  | 2.751283992568  | -2.108548458450 |
| O  | 5.001478252920  | 1.363527694771  | -0.619982001939 |
| O  | 0.268632093039  | -1.627814285945 | 5.078232755565  |
| O  | 1.344983330218  | 1.311118245051  | -0.731888541990 |
| O  | 2.968411191721  | -6.557899115726 | 3.623835590404  |
| O  | -3.318009356596 | -1.624964508358 | 5.075136069711  |
| O  | 9.784517173951  | 2.760548334838  | -2.110734045508 |
| O  | 8.585906273268  | 1.366449545190  | -0.619096131963 |
| O  | 3.836306901605  | -1.616814934041 | 5.053586777896  |
| TV | 10.756067009009 | -0.000000000009 | -0.000000000001 |
| TV | -0.365462250378 | 3.514361361052  | -0.000000000010 |
| TV | -7.489562987922 | -6.219474408950 | 9.025203957651  |

# EQ-CO<sub>2</sub> 160

|   |                 |                 |                 |
|---|-----------------|-----------------|-----------------|
| C | 0.364010182665  | 0.224043714599  | -0.417740137163 |
| C | -1.286782952674 | 1.878166232551  | 2.895391218745  |
| C | 0.731726207345  | 3.571852121286  | -0.415586564953 |
| C | -0.915007522134 | 5.256394199689  | 2.895414289096  |
| C | 1.099008044277  | 6.957261212017  | -0.417168669321 |
| C | -0.532842088872 | 8.672428607380  | 2.890393295648  |
| O | -2.690857290241 | -4.267359579513 | 3.649066399034  |
| O | -2.299947280146 | -0.836707596565 | 3.639707251269  |
| O | 1.017616120460  | -0.419117444513 | 0.330008116282  |
| O | 1.386356500161  | 2.931373401634  | 0.333794979525  |
| O | 0.080527627740  | 4.209514779878  | -1.170936111741 |
| O | -0.253448092290 | 4.621232793955  | 2.147628494265  |
| O | -0.286118989825 | 0.865610077491  | -1.171172195782 |
| O | -1.938310432079 | 2.524681781727  | 3.643678796659  |
| O | -0.632081664336 | 1.228863103370  | 2.153299547990  |

|    |                 |                 |                 |
|----|-----------------|-----------------|-----------------|
| O  | 1.745718368755  | 6.301872317494  | 0.326701779940  |
| O  | 0.455601123316  | 7.609536393025  | -1.167292667810 |
| O  | 0.120187718738  | 8.021951042948  | 2.147844345229  |
| TV | 3.595277450062  | 0.000000000004  | 0.000000000011  |
| TV | 1.117009960586  | 10.156077287984 | -0.000000000039 |
| TV | -5.434299867574 | 0.136983682947  | 8.938260805044  |

# EQ-CO<sub>2</sub> 161

|    |                 |                 |                 |
|----|-----------------|-----------------|-----------------|
| C  | 0.339107291908  | 0.171875366129  | -0.403162675750 |
| C  | -1.442630579930 | 1.823213831255  | 2.888265177228  |
| C  | 0.637852085391  | 3.561182043314  | -0.415675261548 |
| C  | -1.140724276998 | 5.210737007306  | 2.885953842564  |
| C  | 0.892632231970  | 6.966449594844  | -0.330477689114 |
| C  | -0.763763162592 | 8.624018461727  | 3.034112209076  |
| O  | -2.711622234542 | -4.321907469072 | 3.632329412706  |
| O  | -2.338228995175 | -0.929613043193 | 3.794911108369  |
| O  | 1.010772131550  | -0.449085475940 | 0.347831817117  |
| O  | 1.309200388008  | 2.936500453350  | 0.332264141424  |
| O  | -0.029509428228 | 4.185483868179  | -1.168288738452 |
| O  | -0.477824494055 | 4.569681645839  | 2.144029718836  |
| O  | -0.327217486257 | 0.788381581256  | -1.163659710409 |
| O  | -2.112636443976 | 2.448474400891  | 3.638019151389  |
| O  | -0.770753035871 | 1.195299562375  | 2.143345004477  |
| O  | 1.594069216405  | 6.295649461360  | 0.346553300991  |
| O  | 0.195385125991  | 7.633390375158  | -1.015513969082 |
| O  | -0.094812667446 | 8.001048939944  | 2.282810114675  |
| TV | 3.601093901201  | 0.000000000001  | 0.000000000005  |
| TV | 0.910459262483  | 10.172307505559 | -0.000000000048 |
| TV | -5.197046518445 | 0.899452239864  | 8.903123421570  |

# EQ-CO<sub>2</sub> 162

|    |                 |                 |                 |
|----|-----------------|-----------------|-----------------|
| C  | 6.299908655151  | 4.203406738264  | 4.179929251027  |
| C  | -2.342516490016 | -0.691531436452 | 0.210765363124  |
| C  | -4.288617399878 | 2.298705364338  | -1.665654170303 |
| C  | 7.685840339949  | 7.492299946621  | 4.193539282046  |
| C  | -1.095441368889 | 2.597804488439  | 0.203850991958  |
| C  | -3.001945335981 | 5.634380316475  | -1.676903774814 |
| O  | -1.962605566257 | -1.477054688428 | 1.007798805499  |
| O  | -4.065149119686 | 1.878676004385  | -2.751297610154 |
| O  | -2.736469519174 | 0.092225363398  | -0.587230141772 |
| O  | -2.245904248700 | 0.316259020093  | -4.513737072647 |
| O  | -0.854569175129 | 3.598465181940  | -4.499646969992 |
| O  | -4.518160543778 | 2.717254991636  | -0.581879062250 |
| O  | 6.959900569284  | 4.646953595813  | 5.060746544177  |
| O  | -3.279400643059 | 6.001888175195  | -0.585341664380 |
| O  | 8.344178818456  | 7.943362188387  | 5.072439291660  |
| O  | -0.715625279627 | 1.810098006833  | 0.998741157665  |
| O  | -2.727265471747 | 5.268656074667  | -2.769918889928 |
| O  | -1.488678450508 | 3.383118852116  | -0.593062460442 |
| TV | 6.280835420941  | -0.000000000004 | -0.000000000003 |
| TV | 2.494014997487  | 6.566434448813  | 0.000000000002  |
| TV | 7.893031635163  | 3.433930070745  | 7.818960325786  |

# EQ-CO<sub>2</sub> 163

|   |                 |                 |                 |
|---|-----------------|-----------------|-----------------|
| C | 2.139485445385  | -2.276473554662 | -1.397668940233 |
| C | -3.986187891062 | 2.322849281082  | 4.186725380553  |
| C | 5.613416175045  | -2.312781009202 | -1.389353008073 |

|    |                 |                 |                 |
|----|-----------------|-----------------|-----------------|
| C  | -0.462098559167 | 2.372671045465  | 4.040153335735  |
| C  | 9.097197568890  | -2.319074542031 | -1.395860899281 |
| C  | 2.967201494032  | 2.324300239294  | 4.186994614529  |
| O  | -0.300203504980 | -1.831090023685 | 3.288103162511  |
| O  | 3.130996127529  | -1.883005911210 | 3.441106938366  |
| O  | 2.719014470261  | -2.981378340038 | -2.152345933044 |
| O  | 6.183604569671  | -3.034921924111 | -2.135165945361 |
| O  | 5.042964571610  | -1.594596560773 | -0.641366688253 |
| O  | -1.032777016772 | 3.092588313846  | 4.787735088941  |
| O  | 1.559561770219  | -1.577185210376 | -0.638852467100 |
| O  | 6.605557224986  | -1.882785379320 | 3.437888376746  |
| O  | -4.557388960810 | 3.042590980154  | 4.934354279186  |
| O  | 9.669342444141  | -3.038891578830 | -2.143144064714 |
| O  | 8.524971564985  | -1.602391291613 | -0.647427035464 |
| O  | 2.393845106912  | 3.045436889229  | 4.931725188369  |
| TV | 10.429944113730 | 0.000000000006  | 0.000000000003  |
| TV | 0.406884659839  | 3.487181618214  | -0.000000000004 |
| TV | -2.922177022091 | -2.768295288944 | 8.888200642084  |

# EQ-CO<sub>2</sub> 164

|    |                 |                 |                 |
|----|-----------------|-----------------|-----------------|
| C  | 2.436890655780  | -0.631463461888 | 0.189841795998  |
| C  | -1.027914684129 | 0.622063678301  | -0.654153604240 |
| C  | 0.057059239816  | -0.947085245495 | 2.655981634526  |
| C  | 2.846953848859  | 2.677080980289  | 0.189355928037  |
| C  | -0.617623562298 | 3.930781152106  | -0.654189668282 |
| C  | 0.467343046200  | 2.361547894026  | 2.655931108717  |
| O  | 0.462621610343  | -0.471261724265 | 3.658991348293  |
| O  | 2.488039360029  | -0.108461465528 | 1.254380725419  |
| O  | 0.002122377295  | 0.933649367454  | -1.147377010878 |
| O  | -4.842499416703 | -1.160290510242 | -0.866312154643 |
| O  | -4.432519215723 | 2.148262057137  | -0.866809557998 |
| O  | -0.355661415204 | -1.421467648564 | 1.653233971333  |
| O  | -2.054223281823 | 0.311618498523  | -0.154025235448 |
| O  | 0.054575083062  | 1.887160153144  | 1.653196171432  |
| O  | -1.643929638328 | 3.620320146744  | -0.154059644921 |
| O  | 0.872894156457  | 2.837435846327  | 3.658917009768  |
| O  | 2.898220760909  | 3.200054304141  | 1.253896849094  |
| O  | 0.412419037325  | 4.242372717437  | -1.147379678168 |
| TV | 7.218976085217  | 0.000000000000  | 0.000000000002  |
| TV | 0.820451647848  | 6.617439394473  | -0.000000000004 |
| TV | 2.887250792235  | 0.333102942498  | 6.472518254490  |

# EQ-CO<sub>2</sub> 165

|   |                 |                 |                 |
|---|-----------------|-----------------|-----------------|
| C | 0.064527190743  | -0.711515520928 | -0.465454698168 |
| C | -0.676649717308 | 1.075152864990  | 3.003068108675  |
| C | 3.440457456131  | -0.699567946257 | -0.325472446634 |
| C | 2.689880167708  | 1.075378660215  | 3.004099431533  |
| C | 6.842614281995  | -0.704033122083 | -0.387435257061 |
| C | 6.065972316217  | 1.076266347403  | 3.003838629144  |
| O | -0.088165726297 | -3.149829275957 | 3.810857730278  |
| O | 3.280355433018  | -3.148303230790 | 3.811358641807  |
| O | 0.582899155009  | -0.025538063722 | 0.347564189032  |
| O | 4.025521029167  | -0.030376275643 | 0.457493890187  |
| O | 2.858154393387  | -1.365300962019 | -1.113175273567 |
| O | 2.146590592203  | 1.755981721414  | 2.202459838928  |
| O | -0.451496091375 | -1.392692883917 | -1.284227761286 |
| O | 6.649257771888  | -3.150026625575 | 3.813511579983  |

|    |                 |                 |                 |
|----|-----------------|-----------------|-----------------|
| O  | -1.218067131611 | 1.757558778001  | 2.202237309136  |
| O  | 7.475894262836  | -0.024398436619 | 0.346699271384  |
| O  | 6.213584015844  | -1.379673517364 | -1.127883823352 |
| O  | 5.529434687408  | 1.758639460434  | 2.199344575610  |
| TV | 10.108372087789 | -0.000000000000 | -0.000000000000 |
| TV | -0.048335185944 | 3.548787076951  | -0.000000000003 |
| TV | -5.395865570615 | 0.905289635152  | 10.146508743047 |

# EQ-CO<sub>2</sub> 166

|    |                 |                 |                 |
|----|-----------------|-----------------|-----------------|
| C  | -0.047002336773 | -0.471200195906 | -0.340263935787 |
| C  | -0.901369570972 | 1.234735974028  | 3.053913346676  |
| C  | -0.397452683073 | 2.849535866961  | -0.260216735193 |
| C  | -1.167627134833 | 4.730954691484  | 2.971954289599  |
| C  | -0.740665313701 | 6.235046532287  | -0.497460857775 |
| C  | -1.549563569076 | 8.048673755566  | 2.974424503730  |
| O  | 0.078009656374  | -2.658166329896 | 3.813364710104  |
| O  | -0.223982975131 | 0.638962458713  | 3.820311483850  |
| O  | 0.571508150442  | 0.106814623735  | 0.488915512670  |
| O  | 0.250483102001  | 3.499716739322  | 0.488015310976  |
| O  | -1.042394018186 | 2.198661102356  | -1.010209114556 |
| O  | -1.808385705148 | 5.280376727899  | 2.141041608271  |
| O  | -0.664474159007 | -1.044331610223 | -1.171290198918 |
| O  | -0.531503358900 | 4.186930454124  | 3.808829486481  |
| O  | -1.582654418818 | 1.832936878639  | 2.293576308207  |
| O  | -0.066646228613 | 6.945735180966  | 0.168356649317  |
| O  | -1.410032666522 | 5.524657796483  | -1.168879932918 |
| O  | -2.234173444001 | 8.533436322829  | 2.139176810048  |
| TV | 3.578832043994  | 0.000000000021  | -0.000000000040 |
| TV | -0.948646674165 | 10.219063485682 | -0.000000000143 |
| TV | -6.150164846898 | 1.171820208701  | 9.935891638666  |

# EQ-CO<sub>2</sub> 167

|    |                 |                 |                 |
|----|-----------------|-----------------|-----------------|
| C  | 1.596347779199  | -0.071775793588 | -1.986350820674 |
| C  | -3.003177451381 | -1.184234415120 | 4.831288002774  |
| C  | 1.699150470136  | 3.488666084453  | -1.912792608919 |
| C  | -2.890083707572 | 2.341536740875  | 4.831831304902  |
| C  | 1.831242179186  | 7.002608635041  | -1.913550468619 |
| C  | -2.776210844160 | 5.868622412868  | 4.830333477672  |
| O  | -2.326204752519 | -1.828951399810 | 5.558217584574  |
| O  | -2.213511481648 | 1.695886111789  | 5.558269775083  |
| O  | 0.927593883145  | -0.713591453370 | -1.250311456298 |
| O  | 1.035898955108  | 2.911310137746  | -1.119344384870 |
| O  | 2.364206687366  | 4.070395605858  | -2.701804419025 |
| O  | -3.562730129351 | 2.981458813934  | 4.097132586713  |
| O  | 2.268740647388  | 0.571082854823  | -2.718920915223 |
| O  | -2.098748054196 | 5.224831740831  | 5.557961981494  |
| O  | -3.676340926692 | -0.545462135233 | 4.096230564850  |
| O  | 1.166400915960  | 6.434109326267  | -1.115026160645 |
| O  | 2.498500214096  | 7.575289459147  | -2.706774976490 |
| O  | -3.450259490424 | 6.506842121635  | 4.095833982245  |
| TV | 3.552245067089  | -0.000000000003 | 0.000000000001  |
| TV | 0.338405993420  | 10.580385360483 | -0.000000000039 |
| TV | -6.481738043508 | -4.013128065723 | 10.125983285030 |

# EQ-CO<sub>2</sub> 168

|   |                 |                 |                |
|---|-----------------|-----------------|----------------|
| C | -1.744894527437 | -0.493558342327 | 0.080975510882 |
| C | 1.529954790626  | 1.414333176173  | 2.208680499662 |

|    |                 |                 |                 |
|----|-----------------|-----------------|-----------------|
| C  | -0.561717754036 | 2.752935284622  | 0.081015669113  |
| C  | 2.712886587920  | 4.660854847524  | 2.208710013512  |
| C  | 0.619254562480  | 5.999064308541  | 0.081262666381  |
| C  | 3.896096603214  | 7.907222995055  | 2.208775605016  |
| O  | 1.485722382131  | -1.613145628650 | 1.970441300689  |
| O  | 2.669060217536  | 1.633300703327  | 1.970351688627  |
| O  | -0.604321477076 | -0.273187687997 | -0.155230085587 |
| O  | 0.578854743872  | 2.973344224894  | -0.155164910449 |
| O  | -1.701118671338 | 2.532970274958  | 0.317375018556  |
| O  | 1.572356934498  | 4.442932280148  | 2.446884115372  |
| O  | -2.884294355314 | -0.713490032747 | 0.317371973151  |
| O  | 3.852003543536  | 4.879774943634  | 1.970406156659  |
| O  | 0.389421270047  | 1.196399226684  | 2.446851998852  |
| O  | 1.759696466561  | 6.219153721369  | -0.155348456345 |
| O  | -0.520106105350 | 5.779405920136  | 0.317848726092  |
| O  | 2.755553684880  | 7.689337261175  | 2.446918122170  |
| TV | 6.484850052032  | -0.000000000008 | 0.000000000002  |
| TV | 3.549483339977  | 9.739355193737  | 0.000000000036  |
| TV | -0.901233384074 | 2.582710933962  | 4.585657209127  |

# EQ-CO<sub>2</sub> 169

|    |                 |                 |                 |
|----|-----------------|-----------------|-----------------|
| C  | 4.044117493758  | -1.781961721366 | -2.274963064161 |
| C  | -4.088862116726 | 1.256944603236  | 4.550817248644  |
| C  | 4.393836417876  | 1.598609147350  | -2.349997669722 |
| C  | -3.885806658197 | 4.706331038985  | 4.634437169364  |
| C  | 4.903747084874  | 4.864503558330  | -2.035338224841 |
| C  | -2.905301518232 | 7.953824184037  | 4.614442497974  |
| O  | -4.729700296165 | 0.678393791695  | 3.739577779966  |
| O  | -4.542769749339 | 4.266790907819  | 3.752265328105  |
| O  | 4.676239869114  | -2.355550730017 | -1.454929736557 |
| O  | 5.047346703222  | 0.944323430058  | -1.610723088602 |
| O  | 3.738286972558  | 2.256335287379  | -3.085288569907 |
| O  | -3.229010958584 | 5.150360805958  | 5.514057887560  |
| O  | 3.408299260281  | -1.204471546776 | -3.091431711117 |
| O  | -3.555382361257 | 7.521594295927  | 3.724115753139  |
| O  | -3.442925870252 | 1.835986738028  | 5.357193695310  |
| O  | 5.542985962402  | 4.190473272892  | -1.299884847461 |
| O  | 4.260254677684  | 5.537989681620  | -2.765812356978 |
| O  | -2.252532906301 | 8.384064420909  | 5.503883084601  |
| TV | 3.544618959134  | -0.000000000001 | 0.000000000007  |
| TV | 1.439341110159  | 10.044519992898 | -0.000000000062 |
| TV | -5.308625960017 | 1.279326074509  | 10.373969564835 |

# EQ-CO<sub>2</sub> 170

|   |                 |                 |                |
|---|-----------------|-----------------|----------------|
| C | -1.249713871847 | -1.112039131680 | 1.069375236097 |
| C | 0.870186428216  | 1.784167462575  | 1.797577790417 |
| C | -3.445394384714 | -2.695918469365 | 4.491343824072 |
| C | -1.302871155942 | 0.179138833297  | 5.307098937625 |
| C | -5.585366411619 | -4.344000588543 | 8.077705659561 |
| C | -3.513025849678 | -1.445547314910 | 8.813447662295 |
| O | 1.423154118208  | -3.911709818099 | 1.798424022738 |
| O | -0.750124306491 | -5.550483745240 | 5.388660895211 |
| O | -0.068329615682 | -1.169541999756 | 0.990251269966 |
| O | -2.263802792163 | -2.751430361734 | 4.413602455762 |
| O | -4.626186122226 | -2.643535980015 | 4.568553311508 |
| O | -2.484427058656 | 0.129635082082  | 5.222521561868 |
| O | -2.430689766925 | -1.061292869178 | 1.144158396523 |

|    |                 |                 |                 |
|----|-----------------|-----------------|-----------------|
| O  | -2.959399930664 | -7.140251827841 | 8.814376538852  |
| O  | -0.312374331187 | 1.703324848562  | 1.795849797444  |
| O  | -4.403273819032 | -4.400970052052 | 7.998974638601  |
| O  | -6.765544579835 | -4.290408172607 | 8.157416267774  |
| O  | -4.695679450742 | -1.526136649455 | 8.810493354989  |
| TV | 5.171807056192  | -0.000000000001 | 0.000000000008  |
| TV | 0.627752044966  | 5.779135242337  | 0.000000000005  |
| TV | -6.681925849752 | -4.803311899509 | 10.438889060211 |

# EQ-CO<sub>2</sub> 171

|    |                 |                 |                 |
|----|-----------------|-----------------|-----------------|
| C  | 1.469910161285  | 2.387108907845  | 3.156290079508  |
| C  | -1.369340393364 | 0.902656518793  | 0.904521945741  |
| C  | -4.092148285520 | 1.856071903637  | -1.637195733788 |
| C  | -0.776511208341 | 6.745902073860  | 3.156412433188  |
| C  | -3.615773589887 | 5.261426748844  | 0.904538928311  |
| C  | -6.338334893634 | 6.214946149272  | -1.637089404610 |
| O  | -0.940389311848 | 1.188462818226  | 1.970214545842  |
| O  | -3.488355602216 | 1.746845953682  | -2.651075320977 |
| O  | -1.799116830596 | 0.624890528027  | -0.163505881966 |
| O  | -0.638913159514 | 0.390262297319  | -2.766828858511 |
| O  | -2.885339951191 | 4.748999506530  | -2.766745541157 |
| O  | -4.698868838495 | 1.968613978122  | -0.625766645135 |
| O  | 1.232110905976  | 3.036274660138  | 2.196377782077  |
| O  | -6.945075210185 | 6.327442031895  | -0.625668532113 |
| O  | -1.014284533208 | 7.395058440295  | 2.196482283125  |
| O  | -3.186846429454 | 5.547233530216  | 1.970235669717  |
| O  | -5.734629462933 | 6.105667781083  | -2.651014781025 |
| O  | -4.045542676795 | 4.983651811725  | -0.163487211233 |
| TV | 5.978979523901  | -0.000000000002 | -0.000000000003 |
| TV | -4.492794160391 | 8.717575763928  | 0.000000000032  |
| TV | 2.365908903397  | 1.350209227797  | 6.881357864276  |

# EQ-CO<sub>2</sub> 172

|    |                 |                 |                 |
|----|-----------------|-----------------|-----------------|
| C  | 3.047013987593  | -1.493119731726 | -2.243425896710 |
| C  | -3.735302268071 | 0.984042608932  | 4.693195895886  |
| C  | 7.031275066531  | -1.498518211719 | -2.386295354152 |
| C  | 0.169046715733  | 0.983033488402  | 4.689219400607  |
| C  | 10.980640708005 | -1.559341117322 | -2.309589478523 |
| C  | 4.246965817161  | 0.981236580332  | 4.695087568021  |
| O  | -4.503646657716 | 0.938276101439  | 3.794460043260  |
| O  | -0.604520803993 | 0.937905179140  | 3.795150404494  |
| O  | 3.788810654360  | -1.470751141593 | -3.167383445644 |
| O  | 7.770358555201  | -1.476653613425 | -3.312835146501 |
| O  | 6.299494111443  | -1.519741673150 | -1.456404154200 |
| O  | 0.950483485884  | 1.027179074029  | 5.578513389087  |
| O  | 2.317724707230  | -1.514555666487 | -1.310976548341 |
| O  | 3.476696597794  | 0.938863891800  | 3.798621845065  |
| O  | -2.960789445935 | 1.028730258844  | 5.588378615458  |
| O  | 11.786754672144 | -1.462947432499 | -3.172684076191 |
| O  | 10.184372999928 | -1.655951685152 | -1.439241389312 |
| O  | 5.024257620584  | 1.022426121468  | 5.588629503549  |
| TV | 11.892086726470 | 0.000000000003  | 0.000000000014  |
| TV | 0.033378157705  | 4.153942974089  | -0.000000000016 |
| TV | -4.789541173383 | 0.437555670492  | 9.573644202383  |

# EQ-CO<sub>2</sub> 173

|   |                |                |                |
|---|----------------|----------------|----------------|
| C | 0.827519585964 | 1.568784457937 | 2.528325856791 |
|---|----------------|----------------|----------------|



|    |                 |                 |                 |
|----|-----------------|-----------------|-----------------|
| C  | -1.211437031575 | 0.624421330008  | 1.521379037982  |
| C  | -3.845452708271 | 2.857866750467  | -1.568458980055 |
| C  | 4.907446808677  | 1.568613905885  | 2.528269942453  |
| C  | 2.868316624647  | 0.624397552419  | 1.521517118275  |
| C  | 0.234316115081  | 2.857935638624  | -1.568292928738 |
| O  | 0.175140934299  | 0.726193837534  | 1.671351489313  |
| O  | -3.300370367038 | 3.702974068108  | -2.191138577798 |
| O  | -1.642205953153 | -0.113965683418 | 0.676713548275  |
| O  | -1.429044915049 | 2.143368794590  | -3.778018120557 |
| O  | 2.650871768633  | 2.143238639478  | -3.778077432603 |
| O  | -4.392840828996 | 2.014309505603  | -0.944679094049 |
| O  | 2.218702784358  | 1.407898299184  | 2.435713351426  |
| O  | -0.313188816594 | 2.014370109225  | -0.944631473678 |
| O  | 6.298626278833  | 1.407622731332  | 2.435790379053  |
| O  | 4.254952929473  | 0.726141411150  | 1.671361468555  |
| O  | 0.779396281593  | 3.703038075586  | -2.190986222783 |
| O  | 2.437563362255  | -0.114178906776 | 0.676999508563  |
| TV | 8.159658078083  | -0.000000000002 | 0.000000000000  |
| TV | -0.751842311907 | 3.785754966482  | -0.000000000000 |
| TV | 1.836426850965  | 0.244408599595  | 7.079407167060  |

# EQ-CO<sub>2</sub> 174

|    |                 |                 |                 |
|----|-----------------|-----------------|-----------------|
| C  | 0.522156700394  | 1.845641193098  | -0.185251058451 |
| C  | -1.347012945924 | 0.093582712084  | 1.951797381453  |
| C  | -3.115857175268 | 0.932231733516  | -1.652247592872 |
| C  | 0.596626656402  | 6.359231282642  | -0.204415221368 |
| C  | -1.238821550498 | 4.601330621932  | 1.952028318435  |
| C  | -2.978578439603 | 5.436491939741  | -1.627931129704 |
| O  | -0.557972311031 | 0.060488328464  | 2.831113178371  |
| O  | -2.593787744961 | 0.371148782798  | -2.562114914562 |
| O  | -2.136136162437 | 0.127741988712  | 1.072607481775  |
| O  | 0.222066318671  | 0.643226788810  | -0.867835373838 |
| O  | 0.337735087724  | 5.142042212928  | -0.877343138119 |
| O  | -2.815878995772 | 2.134834533173  | -0.969653641254 |
| O  | -0.000228319615 | 2.406871859248  | 0.724341276506  |
| O  | -2.719979120873 | 6.654159611365  | -0.955618193504 |
| O  | 0.034011827028  | 6.925095281707  | 0.677779773910  |
| O  | -0.452127929425 | 4.576167400486  | 2.833833561007  |
| O  | -2.414758322695 | 4.869062971042  | -2.508247936946 |
| O  | -2.025513662832 | 4.627277341355  | 1.070296099564  |
| TV | 4.470623191002  | -0.000000000004 | -0.000000000005 |
| TV | 0.216369874590  | 9.017967973069  | -0.000000000001 |
| TV | 4.586054560275  | 6.426417530448  | 5.740715685508  |

# EQ-CO<sub>2</sub> 175

|   |                 |                 |                 |
|---|-----------------|-----------------|-----------------|
| C | 0.914891117020  | 3.142025489129  | 3.470680252415  |
| C | -0.478237295833 | 1.099319706606  | 0.136608472737  |
| C | -2.554749316627 | 1.125080343575  | -0.916231028975 |
| C | 5.012376025441  | 3.149954126288  | 3.481441113244  |
| C | 3.586412192142  | 1.115700430842  | 0.220057221422  |
| C | 1.579111618962  | 1.104912176761  | -0.964952149041 |
| O | -0.787453930170 | 0.309016221098  | 0.987554013013  |
| O | -2.915667076898 | 0.402331138682  | -1.806306726093 |
| O | -1.249998390206 | 1.651534051060  | -0.836736952078 |
| O | -0.799743066945 | -1.329825895989 | -3.608988621096 |
| O | 3.143964415017  | -1.358106028246 | -3.726255214826 |
| O | -3.267944495515 | 1.607134468695  | 0.142546502024  |

|    |                |                 |                 |
|----|----------------|-----------------|-----------------|
| O  | 1.534711066625 | 2.421163524541  | 2.764658918239  |
| O  | 0.816031743005 | 1.645570156584  | 0.021493667575  |
| O  | 5.786751353022 | 2.467110411955  | 2.901621276592  |
| O  | 3.214822500032 | 0.390595574033  | 1.103802382860  |
| O  | 1.262328871656 | 0.344518795365  | -1.840172370972 |
| O  | 2.883293797843 | 1.629586824058  | -0.827681886693 |
| TV | 8.175860147262 | -0.000000000014 | -0.000000000008 |
| TV | 0.136565216093 | 3.627316903821  | -0.000000000001 |
| TV | 1.096485517181 | 5.190366202972  | 7.791867461529  |

# EQ-CO<sub>2</sub> 176

|    |                 |                 |                 |
|----|-----------------|-----------------|-----------------|
| C  | 0.220991754585  | 1.801898971943  | 2.481760911251  |
| C  | -1.819188655833 | 0.795441978259  | 1.537226602919  |
| C  | -3.227543390274 | 2.916937112416  | -1.491707486283 |
| C  | 4.294840579385  | 1.783493888374  | 2.508917979835  |
| C  | 2.259371419950  | 0.856821986889  | 1.469646583891  |
| C  | 0.858247364749  | 2.925093596205  | -1.552781094116 |
| O  | -0.431496982214 | 0.955070213144  | 1.631534311119  |
| O  | -2.555467309125 | 3.607434616817  | -2.179091921329 |
| O  | -2.242235961848 | -0.034570792319 | 0.778139736233  |
| O  | -0.683167696600 | 1.952627121865  | -3.752344888827 |
| O  | 3.389555459352  | 1.953048991421  | -3.743937287178 |
| O  | -3.894941138883 | 2.228632903678  | -0.798004401718 |
| O  | 1.605590777139  | 1.718694346751  | 2.306113372228  |
| O  | 0.217038105708  | 2.250846330098  | -0.820709558813 |
| O  | 5.681143193661  | 1.658272860592  | 2.376455016792  |
| O  | 3.645324430039  | 0.957106172587  | 1.636131259378  |
| O  | 1.502207883245  | 3.599199263949  | -2.282980409440 |
| O  | 1.840515832540  | 0.072066079428  | 0.662327031065  |
| TV | 8.149628630443  | -0.000000000002 | -0.000000000002 |
| TV | 0.404072780290  | 3.943458700010  | -0.000000000002 |
| TV | 0.478759760082  | 0.614029858549  | 7.060474507242  |

# EQ-CO<sub>2</sub> 177

|    |                 |                 |                 |
|----|-----------------|-----------------|-----------------|
| C  | 3.707876301527  | -2.125932177039 | -0.223040529883 |
| C  | 1.946775882420  | -1.339594619785 | -0.061908480999 |
| C  | -2.340643571506 | -1.963018041957 | 1.582062167089  |
| C  | 4.149234995842  | 1.456753598408  | -0.229901731030 |
| C  | 2.368814014914  | 2.197169785929  | -0.075013247024 |
| C  | -1.970553428977 | 1.669449597095  | 1.577852327935  |
| O  | -1.495869637312 | -2.626263752201 | 1.082697083436  |
| O  | 4.781734407072  | -2.615335800148 | -0.342382212213 |
| O  | 2.493481047840  | -2.297546450812 | -0.943701182378 |
| O  | 0.878567906271  | -0.836134570159 | 0.053205791919  |
| O  | 1.283657527971  | 2.661581674573  | 0.041217679296  |
| O  | 3.158234740208  | -1.172442561161 | 0.660881971728  |
| O  | -3.184936497969 | -1.300365413226 | 2.081923445312  |
| O  | 3.574418320379  | 2.399232321561  | 0.649981693796  |
| O  | -2.744521236361 | 2.404305178892  | 2.090761180688  |
| O  | -1.199916208073 | 0.933026872432  | 1.063431740976  |
| O  | 5.232559563458  | 0.986278578494  | -0.342081135670 |
| O  | 2.945126857663  | 1.257509978503  | -0.956667754132 |
| TV | 9.281545141121  | -0.000000000001 | 0.000000000000  |
| TV | 0.859731239439  | 7.165785976532  | -0.000000000000 |
| TV | -1.072206250729 | -0.396067081510 | 3.442947842380  |

# EQ-CO<sub>2</sub> 178

|    |                 |                 |                 |
|----|-----------------|-----------------|-----------------|
| C  | 0.709479049987  | -0.313269814858 | 0.050841846491  |
| C  | -1.849416788582 | 2.130814312002  | 1.453878671627  |
| C  | -0.901515446504 | -2.262276382600 | 3.575693957578  |
| C  | -3.383718220132 | 0.208605935645  | 5.049622331162  |
| C  | -2.323501923951 | -4.224816176306 | 7.215841802145  |
| C  | -4.856370420612 | -1.750909613062 | 8.684554437684  |
| O  | 0.879290427627  | -2.645803448020 | 1.624386205328  |
| O  | -0.654388711416 | -4.581952358245 | 5.145963893358  |
| O  | 1.652598615170  | -0.070194741269 | 0.757510857211  |
| O  | 0.036816919720  | -1.933542705353 | 4.255251489033  |
| O  | -1.935599614399 | -3.091655237350 | 3.921615837397  |
| O  | -4.402585606504 | 0.369103294186  | 5.950549105225  |
| O  | -0.327058970998 | -1.171086307414 | 0.305071135331  |
| O  | -2.096073298543 | -6.496759532156 | 8.793362765812  |
| O  | -2.930013473427 | 2.288315713653  | 2.280538782056  |
| O  | -1.331905220432 | -3.964980670961 | 7.846478770925  |
| O  | -3.391823947939 | -4.997647276767 | 7.597589463471  |
| O  | -5.936337398775 | -1.696431962056 | 9.528338199021  |
| TV | 5.021568818363  | 0.000000000002  | 0.000000000001  |
| TV | -1.765005995075 | 4.076514868044  | -0.000000000004 |
| TV | -4.620473154394 | -6.075256037477 | 10.709533393352 |

# EQ-CO<sub>2</sub> 179

|    |                 |                 |                 |
|----|-----------------|-----------------|-----------------|
| C  | 0.306972584600  | -1.013218981558 | -0.181947693470 |
| C  | -1.168275850864 | 1.930953550663  | 1.747812168612  |
| C  | -1.118455034545 | -2.661061806477 | 3.639233446947  |
| C  | -2.593682280158 | 0.283103467350  | 5.568952455622  |
| C  | -2.543872495885 | -4.308906344205 | 7.460383304821  |
| C  | -4.019123084402 | -1.364734685724 | 9.390112903282  |
| O  | -0.003196026498 | -3.355313485550 | 1.287743848634  |
| O  | -1.428566596763 | -5.003157203027 | 5.108871451870  |
| O  | 0.763193912932  | -1.182967698655 | 1.100303967528  |
| O  | -0.662216156084 | -2.830810127456 | 4.921474135535  |
| O  | -2.133662725339 | -3.089102778111 | 3.154297432630  |
| O  | -2.935667816652 | 0.723972684429  | 6.821544123255  |
| O  | -0.708216650096 | -1.441279269406 | -0.666906765786 |
| O  | -2.854021426896 | -6.650992104514 | 8.930027416467  |
| O  | -1.510261176926 | 2.371814932768  | 3.000428283916  |
| O  | -2.087654443657 | -4.478645417217 | 8.742633316610  |
| O  | -3.559061185732 | -4.736969373571 | 6.975428822190  |
| O  | -4.361091264552 | -0.923867169071 | 10.642707957758 |
| TV | 4.538251869200  | 0.000000000002  | 0.000000000001  |
| TV | -1.301275212240 | 4.182435138772  | -0.000000000004 |
| TV | -4.276258701913 | -4.943543744728 | 11.463516285749 |

# EQ-CO<sub>2</sub> 180

|   |                 |                 |                 |
|---|-----------------|-----------------|-----------------|
| C | -0.073120236433 | -0.417502674521 | 0.403680876938  |
| C | 0.042477820353  | 1.640197760787  | 1.463922139454  |
| C | 3.721185054736  | -0.414572773737 | 0.517960432444  |
| C | 3.790291653529  | 1.641873246365  | 1.552280022075  |
| C | 7.444805461715  | -0.418080628598 | 0.439339091521  |
| C | 7.578468761315  | 1.639354111630  | 1.479386882895  |
| O | -0.976718348156 | -2.130473043376 | 2.291437535777  |
| O | 2.709473622159  | -2.136339898061 | 2.319228825074  |
| O | 0.425139975129  | -1.734553944524 | 0.492584552484  |
| O | 4.228669576497  | -1.726636133507 | 0.623902416056  |
| O | 2.925606605423  | -0.069045556265 | -0.316369654134 |

|    |                 |                 |                 |
|----|-----------------|-----------------|-----------------|
| O  | 4.316208503232  | 0.333453695853  | 1.490963540411  |
| O  | -0.879174076486 | -0.066909422550 | -0.418360675098 |
| O  | 6.560016949352  | -2.135414084652 | 2.308488395042  |
| O  | 0.540180271693  | 0.323240074342  | 1.370896204082  |
| O  | 7.955940114036  | -1.730526765422 | 0.508207192382  |
| O  | 6.603251669327  | -0.069372440041 | -0.346542083874 |
| O  | 8.087135267193  | 0.327486018030  | 1.379783670466  |
| TV | 11.225579735512 | 0.000000000000  | 0.000000000000  |
| TV | 0.217237682052  | 4.117856293113  | -0.000000000005 |
| TV | -1.761317712534 | -0.020643984322 | 4.602777536438  |

# EQ-CO<sub>2</sub> 181

|    |                 |                 |                 |
|----|-----------------|-----------------|-----------------|
| C  | -0.450145251288 | -1.336372299262 | 0.735733453246  |
| C  | -0.022770231104 | 2.090071155841  | 2.344112584899  |
| C  | -2.462883690568 | -2.990150644892 | 3.943096765536  |
| C  | -2.035499071808 | 0.436298062233  | 5.551478679975  |
| C  | -4.475609942944 | -4.643941375805 | 7.150464250769  |
| C  | -4.048228820387 | -1.217508329823 | 8.758835603787  |
| O  | -0.616240289799 | -3.866683608700 | 1.585799276893  |
| O  | -2.628974617338 | -5.520462623925 | 4.793171713577  |
| O  | 0.878523295682  | -1.477695007706 | 0.497100078099  |
| O  | -1.134214869547 | -3.131467127743 | 3.704463719063  |
| O  | -3.331192307669 | -2.662371241875 | 3.178007176045  |
| O  | -1.935022591956 | 1.766326922075  | 5.305797413567  |
| O  | -1.318449751290 | -1.008586460725 | -0.029359840478 |
| O  | -4.641692040547 | -7.174264668196 | 8.000527044200  |
| O  | 0.077702632465  | 3.420097620506  | 2.098431342156  |
| O  | -3.146937411415 | -4.785227397448 | 6.911835992059  |
| O  | -5.343921088582 | -4.316171418966 | 6.385371301895  |
| O  | -3.947755753241 | 0.112517368212  | 8.513162865758  |
| TV | 5.136613166501  | 0.000000000002  | 0.000000000002  |
| TV | 0.774333256532  | 5.040158824353  | -0.000000000006 |
| TV | -6.038195451726 | -4.961350758420 | 9.622091685208  |

# EQ-CO<sub>2</sub> 182

|    |                 |                 |                 |
|----|-----------------|-----------------|-----------------|
| C  | 0.599304896559  | -1.033955203890 | 0.554318112776  |
| C  | -1.432225706195 | -0.046190383220 | 1.531898613134  |
| C  | 0.529361218671  | 2.766966334555  | 0.554317713186  |
| C  | -1.502164751944 | 3.754775800005  | 1.531877116960  |
| C  | 0.459450952002  | 6.568001734536  | 0.554297288852  |
| C  | -1.572084787813 | 7.555784196726  | 1.531886947952  |
| O  | -1.855880725212 | 0.758452774082  | 2.320968633068  |
| O  | -1.925803157555 | 4.559506523194  | 2.320876694872  |
| O  | 1.974740356595  | -0.808715237518 | 0.599939956852  |
| O  | 1.904813625906  | 2.992164432958  | 0.599977263679  |
| O  | 0.105379113943  | 1.959410117201  | -0.232048717166 |
| O  | -0.126270783508 | 3.532503547519  | 1.484521715118  |
| O  | 0.175324732277  | -1.841528680367 | -0.232036641389 |
| O  | -1.995727311148 | 8.360422075420  | 2.320971727446  |
| O  | -0.056333255634 | -0.268433052190 | 1.484523070622  |
| O  | 1.834886218727  | 6.793251953956  | 0.599928193078  |
| O  | 0.035476824044  | 5.760415191886  | -0.232045484140 |
| O  | -0.196197425368 | 7.333533672597  | 1.484510601951  |
| TV | 4.063749244308  | -0.000000000005 | -0.000000000030 |
| TV | -0.209811268212 | 11.402932962162 | -0.000000000177 |
| TV | -3.969049519050 | 0.242065205957  | 4.302894403968  |

# EQ-CO<sub>2</sub> 183

|    |                 |                 |                 |
|----|-----------------|-----------------|-----------------|
| C  | -0.311146986138 | 0.395507337536  | 1.286868354206  |
| C  | 1.555169344425  | -3.161837109035 | 2.582716239969  |
| C  | 0.891040641924  | -2.886510310341 | -0.919441013584 |
| C  | 3.130591826512  | 0.413189680504  | 1.807864315717  |
| C  | 5.406255526987  | -3.812297723908 | 3.150237893714  |
| C  | 4.305263802740  | -2.903107071820 | -0.615419999807 |
| O  | 2.221519473057  | 0.462284379555  | -0.856720347398 |
| O  | 0.253681669608  | -0.556168783584 | 0.864532512862  |
| O  | -0.709551027368 | 3.622929396765  | -0.334485455275 |
| O  | -0.869686803520 | 1.343794558407  | 1.720019065007  |
| O  | 2.629395142602  | 1.486822017128  | 1.822149146595  |
| O  | 2.284949063900  | -3.210700500166 | 1.695752071359  |
| O  | 1.549198079050  | -2.096961027232 | -1.509286251532 |
| O  | 5.331214971536  | -3.091291880038 | 2.214287785400  |
| O  | 4.721957459480  | -1.796416751910 | -0.637130207585 |
| O  | 4.985282923236  | 0.943196233854  | -1.250836730832 |
| O  | 3.637327428889  | -0.656127360428 | 1.819334493520  |
| O  | 2.942747051239  | 3.286308111242  | -0.615804242611 |
| TV | 6.824142392629  | 0.000000000000  | -0.000000000027 |
| TV | -0.941950995456 | 7.296997523598  | 0.000000000055  |
| TV | -0.453087218152 | 1.824553523342  | 5.340364246048  |

# EQ-CO<sub>2</sub> 184

|    |                 |                 |                 |
|----|-----------------|-----------------|-----------------|
| C  | 0.539393705870  | -0.440670611385 | 2.266368204799  |
| C  | 0.943341589781  | 2.825554257420  | 5.163950151794  |
| C  | 4.340498699377  | -0.265876604729 | 2.676242312148  |
| C  | 4.728328177911  | 1.773389143285  | 6.147475216324  |
| C  | 7.787780686788  | -0.571193675141 | 2.325701801956  |
| C  | 8.572921406135  | 0.783382791589  | 5.515505454867  |
| O  | -1.285820118745 | 1.448521337881  | -0.638524527006 |
| O  | 2.538112315994  | 0.530218744760  | -1.507405760013 |
| O  | -0.032097913713 | 2.398534206016  | -0.615516353367 |
| O  | 3.133548615528  | 2.013083705422  | 0.233964662262  |
| O  | 3.612981489063  | -1.041971394561 | 3.189175396163  |
| O  | 5.079100239536  | 0.506329425574  | 2.164682995211  |
| O  | -0.263534888572 | -1.242834208811 | 2.603367592293  |
| O  | 7.645181112533  | -0.192529825697 | -1.765199516835 |
| O  | 1.328280011941  | 0.361188055181  | 1.900608211688  |
| O  | 5.721098914559  | 0.756632682812  | -0.767468437729 |
| O  | 7.579094665383  | -1.161854729716 | 3.330282129170  |
| O  | 7.999334667534  | 0.023637904086  | 1.325401922823  |
| TV | 10.840872422712 | 0.000000000005  | 0.000000000005  |
| TV | -0.569109697427 | 3.507107908751  | 0.000000000001  |
| TV | 1.891768361231  | 0.503050731238  | 6.780884204015  |

# EQ-CO<sub>2</sub> 185

|   |                 |                 |                 |
|---|-----------------|-----------------|-----------------|
| C | 0.326590392872  | 2.563823458747  | 1.225911399318  |
| C | 3.115102678589  | -2.387509549326 | -1.576916255005 |
| C | 0.678819860034  | -0.561494260651 | -3.707305497882 |
| C | 0.596257728365  | 6.833166296716  | 1.225909149531  |
| C | 3.384771938736  | 1.881839363754  | -1.576891564664 |
| C | 0.948479902039  | 3.707843112485  | -3.707287640663 |
| O | -0.315858406988 | -0.985804111069 | 0.132918834200  |
| O | -0.561467404342 | 0.479023455482  | 0.516900347940  |
| O | 0.232941703676  | -1.347558902563 | 2.367198408631  |
| O | 1.752081732262  | 0.641275094937  | 0.754741203152  |

|    |                 |                 |                 |
|----|-----------------|-----------------|-----------------|
| O  | 2.021743259831  | 4.910617050883  | 0.754758477644  |
| O  | -3.169669195038 | -1.506032490609 | -0.834598207617 |
| O  | 3.345806881618  | -1.612716078283 | 2.148622081410  |
| O  | -2.900028433680 | 2.763305643434  | -0.834571765168 |
| O  | 3.615510919603  | 2.656641593468  | 2.148649035313  |
| O  | -0.046195258084 | 3.283535175934  | 0.132928604102  |
| O  | -0.291810657934 | 4.748354280241  | 0.516918348516  |
| O  | 0.502640784335  | 2.921779156449  | 2.367198164858  |
| TV | 6.017145342900  | -0.000000000000 | 0.000000000000  |
| TV | 0.539349069419  | 8.538681337862  | -0.000000000001 |
| TV | -0.043994631061 | 1.656342325875  | 4.468137751796  |

# EQ-CO<sub>2</sub> 186

|    |                 |                 |                 |
|----|-----------------|-----------------|-----------------|
| C  | 1.300329813020  | -0.164541052900 | 0.776749709156  |
| C  | 2.430467634059  | 0.877870306882  | 0.560093950345  |
| C  | -2.521805256995 | 2.761755783532  | 0.653455927268  |
| C  | 0.422373591759  | 4.626138567837  | 0.776743300290  |
| C  | 1.552519282243  | 5.668548598589  | 0.560084387629  |
| C  | -3.399174662391 | 7.552726798607  | 0.653436101928  |
| O  | 3.391217508179  | 0.666608902762  | -0.397925712200 |
| O  | -2.207022602714 | 1.838769099177  | 1.321954733878  |
| O  | -2.836151665723 | 3.684889518164  | -0.015724200940 |
| O  | 1.135855215662  | -1.194288261478 | 0.147428120137  |
| O  | 0.257898960071  | 3.596390033955  | 0.147426603362  |
| O  | 3.218427851262  | -0.606788980051 | -1.235751268518 |
| O  | -5.346400608494 | 1.914844503238  | 1.179571237614  |
| O  | 2.340486262447  | 4.183878490687  | -1.235752581093 |
| O  | -6.224341020734 | 6.705533251529  | 1.179541197354  |
| O  | 2.513276324695  | 5.457273375358  | -0.397931123676 |
| O  | -3.084500765241 | 6.629669385011  | 1.321888745039  |
| O  | -3.713617917172 | 8.475852996073  | -0.015710931539 |
| TV | 7.931995871366  | -0.000000000003 | -0.000000000002 |
| TV | -1.755897999388 | 9.581323536276  | -0.000000000006 |
| TV | -1.989599784997 | -4.147382035082 | 2.984851216716  |

# EQ-CO<sub>2</sub> 187

|    |                 |                 |                 |
|----|-----------------|-----------------|-----------------|
| C  | -1.151360590570 | 1.447636901770  | 1.604585487312  |
| C  | -1.876148111993 | 0.473067739670  | 0.636198574568  |
| C  | -1.617253717596 | 3.988243754375  | -0.881874622370 |
| C  | -2.400184342292 | 1.726990741938  | 5.636413869840  |
| C  | -3.124980138553 | 0.752384028724  | 4.668061956975  |
| C  | -2.866156254083 | 4.267912428027  | 3.149853600414  |
| O  | -2.816016731206 | -0.247071370455 | 0.918727458188  |
| O  | -0.815597692690 | 4.485088665509  | -1.595898715768 |
| O  | -1.468446935066 | 0.353719239692  | -0.674704839114 |
| O  | -0.317505449863 | 1.288203418532  | -1.117730723954 |
| O  | -1.566383568823 | 1.567536125776  | 2.914119572818  |
| O  | -2.418679343237 | 3.492567865726  | -0.166509387972 |
| O  | -0.214923571590 | 2.173609341314  | 1.326028622337  |
| O  | -3.667516584708 | 3.772004066477  | 3.865137681230  |
| O  | -1.463768498484 | 2.452994002581  | 5.357849776921  |
| O  | -4.064809092927 | 0.032205388403  | 4.950638405678  |
| O  | -2.064566995627 | 4.764948039389  | 2.435888254582  |
| O  | -2.717367881030 | 0.633126232372  | 3.357109284045  |
| TV | 4.228107724832  | -0.000000000001 | -0.000000000002 |
| TV | -1.531979461642 | 6.268713025819  | 0.000000000008  |
| TV | -2.497777962135 | 0.558751818969  | 8.063638569477  |

# EQ-CO<sub>2</sub> 188

|    |                 |                 |                 |
|----|-----------------|-----------------|-----------------|
| C  | -0.866754291667 | 1.463987995708  | 1.014235716002  |
| C  | -1.996370759377 | 0.459562352752  | 0.616421788894  |
| C  | -2.380556662020 | 3.605089661004  | -1.024452388243 |
| C  | 3.987969028745  | 1.334713595679  | 0.914991517886  |
| C  | 2.774467355587  | 0.419108201441  | 0.556268631737  |
| C  | 2.568215027316  | 3.610690116103  | -1.008277507566 |
| O  | -2.927135768996 | -0.151734963875 | 1.065038469188  |
| O  | -1.685591712581 | 4.074076113531  | -1.858185243416 |
| O  | -1.540165398548 | 0.488067032219  | -0.707972573692 |
| O  | -0.437806587000 | 1.481612412572  | -0.323282430767 |
| O  | 4.381510574372  | 1.311057238980  | -0.436293310218 |
| O  | -3.070259589757 | 3.139153782081  | -0.179551837791 |
| O  | -0.410241401488 | 2.069688769733  | 1.940372629833  |
| O  | 1.879737949261  | 3.153428802543  | -0.157657068541 |
| O  | 4.510077241036  | 1.909178239690  | 1.825137452829  |
| O  | 1.826224168868  | -0.136294814837 | 1.041746911270  |
| O  | 3.264518650696  | 4.071028949366  | -1.846458532279 |
| O  | 3.177556738583  | 0.426568928565  | -0.784094030299 |
| TV | 9.561884136171  | 0.000000000062  | 0.000000000215  |
| TV | -2.756284464513 | 5.318551015265  | 0.000000000033  |
| TV | -1.651217443862 | 0.203572441865  | 4.693271874766  |

# EQ-CO<sub>2</sub> 189

|    |                 |                 |                 |
|----|-----------------|-----------------|-----------------|
| C  | -0.608804152451 | 1.780122857890  | 0.782862007532  |
| C  | -1.753801186053 | 0.916451306735  | 1.370073114391  |
| C  | -1.649315479154 | 2.548226492232  | -1.975694569600 |
| C  | -1.029266411072 | 5.660433438050  | 1.197496845788  |
| C  | -2.176911957093 | 4.735537796446  | 1.700086383602  |
| C  | -3.323741276116 | 7.265927301719  | -2.200055330944 |
| O  | -2.681707562889 | 0.982556554630  | 2.127163141616  |
| O  | -0.738926714891 | 2.997116557118  | -2.581864502753 |
| O  | -1.316375849541 | -0.171300623017 | 0.599761234701  |
| O  | -0.175462669235 | 0.682007441966  | 0.023828410270  |
| O  | -1.467936026066 | 5.467315301154  | -0.121455396826 |
| O  | -2.543845837080 | 2.087446861163  | -1.346136996088 |
| O  | -0.167896604531 | 2.894604588318  | 0.802162896575  |
| O  | -4.216745746351 | 6.732978579836  | -1.641337433833 |
| O  | -0.110370760798 | 6.322816890109  | 1.592241061605  |
| O  | -2.650044928729 | 4.267609965828  | 2.698891417459  |
| O  | -2.421217430532 | 7.805192972919  | -2.752530863128 |
| O  | -2.605431459740 | 4.572648436546  | 0.372496775206  |
| TV | 4.552664409971  | 0.000000000002  | 0.000000000002  |
| TV | -1.292959738971 | 8.260479685035  | 0.000000000001  |
| TV | 0.218472672216  | -0.476595755008 | 6.413525741618  |

# EQ-CO<sub>2</sub> 190

|   |                 |                |                 |
|---|-----------------|----------------|-----------------|
| C | -0.225473330153 | 1.882337796674 | 1.525052636870  |
| C | -1.603354751707 | 1.232592852774 | 1.217709137698  |
| C | -2.410914040482 | 2.038352819940 | -2.257070769477 |
| C | -0.631843974045 | 5.268071278958 | 1.525151936182  |
| C | -2.009542636129 | 4.618096997983 | 1.217829590226  |
| C | -2.817014591918 | 5.423508285630 | -2.256997201061 |
| O | -2.717878058692 | 1.122512022297 | 1.637608185604  |
| O | -1.501359876493 | 2.682877400629 | -2.659122920918 |
| O | -1.063840378062 | 0.686987506286 | 0.030890868785  |

|    |                 |                |                 |
|----|-----------------|----------------|-----------------|
| O  | 0.284890428719  | 1.347195560360 | 0.331017920893  |
| O  | -0.121136257631 | 4.732605193633 | 0.331543500968  |
| O  | -3.309328494630 | 1.393958076935 | -1.831844472013 |
| O  | 0.319523464580  | 2.583111292261 | 2.329241482658  |
| O  | -3.715734303305 | 4.779689919443 | -1.831698339691 |
| O  | -0.087080977126 | 5.969135391397 | 2.329294341660  |
| O  | -3.124215210492 | 4.507876679589 | 1.637309309718  |
| O  | -1.907106655332 | 6.067402809599 | -2.659278255661 |
| O  | -1.469661207017 | 4.071983055935 | 0.031351243120  |
| TV | 5.562787755751  | 0.000000000000 | -0.000000000001 |
| TV | -0.812846923322 | 6.770484456805 | -0.000000000000 |
| TV | -0.673086326147 | 0.237966339187 | 6.643852915262  |

# EQ-CO<sub>2</sub> 191

|    |                 |                 |                 |
|----|-----------------|-----------------|-----------------|
| C  | 3.865764042072  | 3.244729192004  | 3.332258853110  |
| C  | 1.447566086793  | 1.837626066652  | 1.658342694775  |
| C  | -4.200354321493 | 1.557682049298  | -0.656186504001 |
| C  | 5.390700471669  | 5.703671580995  | 3.381982356782  |
| C  | -0.723857679779 | 3.862789949756  | 0.296588909966  |
| C  | -6.001529397789 | 4.427392632702  | -1.274903373421 |
| O  | 0.484817256123  | 1.219639169301  | 1.777311157226  |
| O  | -5.176689927421 | 1.754682399613  | -1.298553793374 |
| O  | -0.934853620708 | 0.801355929230  | -1.882540840224 |
| O  | -3.256610566860 | 0.330686535791  | -3.145256561506 |
| O  | -0.584275487684 | 2.688471073760  | -3.038090513779 |
| O  | -3.220438182976 | 1.352646251872  | -0.027580726023 |
| O  | 4.831052739619  | 2.808094298473  | 2.455947027318  |
| O  | -5.812511712380 | 4.425201518456  | -0.103556642200 |
| O  | 4.423712401638  | 5.451912159140  | 2.422174064065  |
| O  | -1.189465156577 | 4.383583199087  | 1.209691496619  |
| O  | -6.178326882222 | 4.430598318296  | -2.444234822820 |
| O  | -2.882056518676 | 3.600308967148  | -1.960253912177 |
| TV | 8.120679132243  | -0.000000000016 | 0.000000000005  |
| TV | 0.476544220602  | 5.159689682286  | -0.000000000007 |
| TV | 6.671143928829  | 4.190588950143  | 6.178002303963  |

# EQ-CO<sub>2</sub> 192

|    |                 |                 |                 |
|----|-----------------|-----------------|-----------------|
| C  | 5.135460090322  | -1.328759496971 | 1.076469204192  |
| C  | -0.212539506499 | -1.250444512161 | -1.823403942986 |
| C  | -3.113902498238 | -1.815720818565 | 1.076371292087  |
| C  | 6.240138763922  | -2.299595506362 | 4.378617684743  |
| C  | 0.892201551701  | -2.221043254773 | 1.478703116601  |
| C  | -2.009122896024 | -2.786411933718 | 4.378577139389  |
| O  | -3.158902678758 | -2.569552590606 | 0.164397819224  |
| O  | 4.346161328972  | -1.826388961050 | 0.164278209313  |
| O  | -1.318537714644 | -1.294772425258 | -2.137093760907 |
| O  | 2.955896529730  | -4.216691648900 | 2.232581199815  |
| O  | 4.060537032004  | -5.187568212876 | 5.534726344429  |
| O  | 6.375311009129  | -1.182773915269 | 0.824876268415  |
| O  | -3.068517215812 | -1.060091093558 | 1.985096897226  |
| O  | 7.480004438832  | -2.153652247260 | 4.127046594190  |
| O  | -1.963740802491 | -2.030726852022 | 5.287265706579  |
| O  | -2.054137958786 | -3.540279600200 | 3.466636681138  |
| O  | 5.450795931764  | -2.797098638624 | 3.466399478283  |
| O  | -0.213823600892 | -2.265555284781 | 1.165150790374  |
| TV | 12.374114125315 | -0.000000000003 | 0.000000000010  |
| TV | 1.671806309119  | 3.204127389842  | -0.000000000005 |



|                          |                 |                 |                 |
|--------------------------|-----------------|-----------------|-----------------|
| TV                       | 2.209504273969  | -1.941294151935 | 6.604416241807  |
| # EQ-CO <sub>2</sub> 193 |                 |                 |                 |
| C                        | 1.587213644979  | 1.274536287237  | 1.887333459331  |
| C                        | -1.224814175329 | -0.043486314877 | 0.717366185082  |
| C                        | -3.846556911107 | 1.867725897069  | -1.601860124164 |
| C                        | 1.591419713582  | 4.886925833059  | 1.887255961115  |
| C                        | -1.220287497617 | 3.568692760392  | 0.718150889727  |
| C                        | -3.842346277625 | 5.480014858245  | -1.601860389433 |
| O                        | -0.963760173850 | -0.720568243292 | 1.652290004839  |
| O                        | -2.904663548243 | 2.013284474356  | -2.436708013630 |
| O                        | -1.506007616697 | 0.633992859435  | -0.212259185409 |
| O                        | 0.929817321512  | 0.864870626332  | -1.799168803582 |
| O                        | 0.933996533633  | 4.477185472902  | -1.799171177234 |
| O                        | -4.084507040775 | 2.678950623548  | -0.611511525553 |
| O                        | 2.035987885934  | 1.882356153466  | 2.754918190760  |
| O                        | -4.080348748227 | 6.291283037128  | -0.611556260943 |
| O                        | 2.040226004754  | 5.494635373038  | 2.754910349171  |
| O                        | -0.959273035247 | 2.891371449397  | 1.652941858808  |
| O                        | -2.900374276019 | 5.625516346898  | -2.436630829455 |
| O                        | -1.501541563307 | 4.246401884006  | -0.211301718983 |
| TV                       | 5.604534576174  | -0.000000000007 | -0.000000000004 |
| TV                       | 0.008396738289  | 7.224633899728  | -0.000000000002 |
| TV                       | 2.359724628803  | 2.806692654038  | 6.517451265786  |

|                          |                 |                 |                 |
|--------------------------|-----------------|-----------------|-----------------|
| # EQ-CO <sub>2</sub> 194 |                 |                 |                 |
| C                        | -0.082785849638 | 1.787499783016  | 3.098272006366  |
| C                        | -1.927529060836 | 0.535283887809  | 1.090311319843  |
| C                        | -1.598831913998 | 2.094279280951  | -3.092112289351 |
| C                        | -0.073968205195 | 5.510413998700  | 3.235759850241  |
| C                        | -1.832599313078 | 4.196536193700  | 1.130918927146  |
| C                        | -1.571358083162 | 5.845932923720  | -2.986409050557 |
| O                        | -2.351001675926 | -0.182237857905 | 1.931538895391  |
| O                        | -1.805231935197 | -2.172584631162 | -3.950972160630 |
| O                        | -1.404177457425 | 2.797915345395  | -2.159373306797 |
| O                        | 0.697863883083  | 0.546565430842  | -1.219006171009 |
| O                        | 0.768245956173  | 4.123439016871  | -1.291680530127 |
| O                        | -1.334052827412 | 4.796336240090  | 0.240390836158  |
| O                        | 0.070483179787  | 1.959556678536  | 4.225077246988  |
| O                        | -1.444471470552 | 8.619112213971  | 0.257281160771  |
| O                        | 0.124114568956  | 5.695943232849  | 4.354125242572  |
| O                        | -2.335831237708 | 3.605378795320  | 2.024854275421  |
| O                        | -1.787721285339 | 1.398470508443  | -4.030617605634 |
| O                        | -1.392886036900 | 6.516835894228  | -2.025644474928 |
| TV                       | 4.335950565265  | -0.000000000010 | 0.000000000001  |
| TV                       | 0.058639743521  | 7.356459732371  | 0.000000000004  |
| TV                       | -0.355749296158 | 2.299561639351  | 9.119273208514  |

|                          |                 |                 |                 |
|--------------------------|-----------------|-----------------|-----------------|
| # EQ-CO <sub>2</sub> 195 |                 |                 |                 |
| C                        | -1.435555035454 | 0.970895124090  | -1.629194608218 |
| C                        | -0.719556049144 | 2.961141433203  | -0.431708178403 |
| C                        | -0.710450477184 | -0.019298778274 | -0.671134398392 |
| C                        | -0.728359174968 | 5.270311091988  | -1.725832951542 |
| C                        | -0.129559301142 | 7.232285766543  | -0.425289279840 |
| C                        | -0.000407751318 | 4.292280741851  | -0.761169555477 |
| O                        | -1.017246919060 | 2.603740064369  | 0.685182286042  |
| O                        | -0.963121551841 | 2.289972234081  | -1.622982506401 |

|    |                 |                 |                 |
|----|-----------------|-----------------|-----------------|
| O  | 0.231757194115  | -1.332372145793 | -3.925805842171 |
| O  | -2.246242849725 | 0.626028259200  | -2.456946057141 |
| O  | -1.461651852928 | 4.907321905710  | -2.615780816480 |
| O  | 0.382247691232  | 0.220575705279  | -0.185327995262 |
| O  | 0.039199029155  | -0.157975222368 | -4.276688605056 |
| O  | 1.123496349309  | 4.518422056599  | -0.342543582208 |
| O  | 0.670417164430  | 4.112453765755  | -4.425949798280 |
| O  | -0.424824462042 | 6.804436292330  | 0.667617062551  |
| O  | -0.329555349890 | 6.613559581249  | -1.650948937776 |
| O  | 0.722654698929  | 2.977815765948  | -3.928289159275 |
| TV | 4.316788695711  | -0.000000000002 | 0.000000000000  |
| TV | 1.268208756765  | 8.618850692528  | 0.000000000001  |
| TV | 1.083867255867  | 1.452486989285  | 6.566013210163  |

# EQ-CO<sub>2</sub> 196

|    |                 |                 |                 |
|----|-----------------|-----------------|-----------------|
| C  | 1.012300067803  | -0.032923206338 | -1.068829196161 |
| C  | 0.449263520152  | 1.262851307902  | -1.710059126158 |
| C  | 4.590665103193  | -0.066552738554 | -1.067379566195 |
| C  | 4.020789359234  | 1.220230955301  | -1.714090731633 |
| C  | 8.237433489010  | -0.021658527162 | -1.057255562350 |
| C  | 7.634073920469  | 1.259972705022  | -1.695146890824 |
| O  | 1.704774260100  | -0.976383841241 | -1.332135532777 |
| O  | 5.286046011195  | -1.007496314739 | -1.330386820348 |
| O  | 3.359340851119  | 1.522197755029  | -0.504911304132 |
| O  | 6.933086392716  | 1.511741488284  | -0.498087758589 |
| O  | 4.024815754394  | 1.829006107656  | -2.743893466462 |
| O  | 3.940150586510  | 0.251997425215  | 0.133649613401  |
| O  | 0.463364395735  | 1.884629297390  | -2.732399269789 |
| O  | 8.976341723133  | -0.931473125381 | -1.316423356880 |
| O  | 0.357615236012  | 0.280666599614  | 0.130370060657  |
| O  | 10.653073056848 | 1.553543729761  | -0.503638033748 |
| O  | 7.630057813143  | 1.889318610600  | -2.713087533655 |
| O  | 7.535721920607  | 0.246465442350  | 0.128693602886  |
| TV | 10.873418891484 | 0.000000000000  | 0.000000000000  |
| TV | 0.239898934397  | 4.919243928460  | -0.000000000002 |
| TV | 1.027287693649  | 1.043851393284  | 4.205256432520  |

# EQ-CO<sub>2</sub> 197

|    |                 |                 |                 |
|----|-----------------|-----------------|-----------------|
| C  | -2.488293083341 | -3.408325600521 | -3.101733729704 |
| C  | -0.004275610558 | -1.082538776939 | -2.900617360140 |
| C  | -0.007712477620 | 1.470906077188  | 0.131920833184  |
| C  | -2.514521415829 | 2.033506627147  | -3.155545800503 |
| C  | -0.033459011613 | 4.392497295585  | -2.904163033253 |
| C  | -0.038090997068 | 6.948064761495  | 0.134001350227  |
| O  | -2.476650192198 | -4.374759907225 | -2.477209769098 |
| O  | -2.480605691478 | -2.083791978009 | 0.157519161347  |
| O  | -2.490156639350 | -1.031341561483 | -0.498389182902 |
| O  | 0.003208257872  | -1.972722795962 | -2.120609983905 |
| O  | -0.025482050411 | 3.501030560552  | -2.125407143202 |
| O  | -0.011605662733 | -0.183796373662 | -3.668577422182 |
| O  | -0.007019522597 | 0.805312837501  | -0.804882847951 |
| O  | -0.041191528610 | 5.291810386218  | -3.671614185115 |
| O  | -0.036184828623 | 6.286668526678  | -0.805674573122 |
| O  | -2.505826393739 | 1.101148172327  | -2.480811804199 |
| O  | -2.510101881614 | 3.396600567170  | 0.018509531876  |
| O  | -2.519559707982 | 4.521803041836  | -0.502573533061 |
| TV | 4.984354361215  | -0.000000000002 | -0.000000000000 |

|    |                 |                 |                |
|----|-----------------|-----------------|----------------|
| TV | -0.058527794702 | 10.953933426451 | 0.000000000002 |
| TV | 0.021139955303  | -0.936125362059 | 5.313178649308 |

# EQ-CO<sub>2</sub> 198

|    |                 |                 |                 |
|----|-----------------|-----------------|-----------------|
| C  | 0.500165644181  | 0.306985212608  | 3.084582882373  |
| C  | -3.017977827850 | 0.430932688608  | 1.050717626643  |
| C  | 0.141106818033  | 0.506485860921  | -0.875392077176 |
| C  | 1.584082223873  | 3.581709974306  | 3.060910747633  |
| C  | -1.930204277423 | 3.748454042573  | 1.082718544529  |
| C  | 1.237444280974  | 3.820089074630  | -0.909198650840 |
| O  | -3.591171491158 | 1.291366535455  | 1.626936246199  |
| O  | -0.418355517186 | 0.619709159515  | 2.464660690374  |
| O  | -2.206872357731 | 2.422825985231  | 4.024612632333  |
| O  | 1.079134539678  | 0.113523343853  | -0.334879992045 |
| O  | 2.154360699810  | 3.428961777620  | -0.332895305018 |
| O  | -2.445708770528 | -0.428972909644 | 0.473353714434  |
| O  | -2.627993502496 | 1.651245256422  | -1.784878485137 |
| O  | -1.290381756932 | 2.907270117865  | 0.550213130843  |
| O  | -1.639812824071 | 4.810395945388  | -1.794541356696 |
| O  | -2.569491633153 | 4.589612008756  | 1.616252010778  |
| O  | 0.749461235237  | 4.071739675702  | 2.436425687262  |
| O  | -1.189655318802 | 5.745437291244  | 3.898114055788  |
| TV | 6.651408536435  | 0.000000000000  | -0.000000000000 |
| TV | 2.164424717004  | 6.632133118621  | 0.000000000000  |
| TV | 1.387873538772  | 1.196285173934  | 6.462747410953  |

# EQ-CO<sub>2</sub> 199

|    |                 |                 |                 |
|----|-----------------|-----------------|-----------------|
| C  | -0.115531761567 | 2.109308339843  | 4.381145225245  |
| C  | -1.968119243090 | 0.368247991454  | 1.252975061127  |
| C  | -0.181517657507 | 6.129762122364  | -1.901735892230 |
| C  | 3.396917989856  | 2.119454086421  | 4.444336921464  |
| C  | 1.588592089167  | 0.320488061701  | 1.234637908632  |
| C  | 3.343335849473  | 6.052573179488  | -1.949644640854 |
| O  | -1.369384546119 | -0.364288245593 | 1.962915277572  |
| O  | -2.375971514149 | -7.365853363594 | -3.891766583800 |
| O  | -0.698887888202 | 6.798013857771  | -1.120742521352 |
| O  | -1.697979656560 | -2.629688437313 | -4.412050777440 |
| O  | 1.687202166616  | -2.605444825134 | -4.477138186586 |
| O  | -2.497863473675 | 4.891667465871  | 0.543014609299  |
| O  | 0.507631369733  | 1.485256594125  | 3.641796006829  |
| O  | 1.017661561398  | 4.851026485557  | 0.569241790465  |
| O  | 3.943802715460  | 1.477994648587  | 3.661202895289  |
| O  | 2.230142619293  | -0.418829975351 | 1.899318519137  |
| O  | 1.134983830903  | -7.363391860003 | -3.872898030758 |
| O  | 2.815524918562  | 6.755483101146  | -1.206848413069 |
| TV | 7.033773074068  | -0.000000000032 | -0.000000000005 |
| TV | 0.068814416038  | 3.790452079137  | 0.000000000028  |
| TV | -0.001798848053 | 2.987647654098  | 10.803241991971 |

# EQ-CO<sub>2</sub> 200

|   |                 |                 |                 |
|---|-----------------|-----------------|-----------------|
| C | 1.333546632635  | -1.311161975179 | -0.645930608365 |
| C | 0.667805553478  | -0.222730696621 | 2.952377161477  |
| C | 3.884804365550  | -0.309541419009 | 2.864448215160  |
| C | 3.111458821744  | 2.150737757797  | -0.625585441264 |
| C | 2.563436349975  | 3.289610217366  | 2.977210407436  |
| C | 5.720082928094  | 3.165251315076  | 2.803286758137  |
| O | -1.056638292804 | 0.790908684508  | -0.203726697930 |

|    |                 |                 |                 |
|----|-----------------|-----------------|-----------------|
| O  | 1.820949752908  | -0.644670458044 | 0.155026667291  |
| O  | 3.733455580462  | 0.578504124280  | 2.097336412304  |
| O  | 4.048426410343  | -1.204720893116 | 3.622776730631  |
| O  | 5.809784291576  | 2.275225436553  | 3.580372337205  |
| O  | -0.343514812256 | -0.503659305745 | 2.479330387488  |
| O  | -0.358691877549 | 1.659239525658  | 0.339544086537  |
| O  | 1.490979265953  | 3.073801798364  | 2.619666787603  |
| O  | 1.398349201824  | 5.130419391428  | 0.346656802599  |
| O  | 0.707627694778  | 4.255669760549  | -0.195729403538 |
| O  | 3.591951309901  | 2.822133215597  | 0.175316933246  |
| O  | 5.645199409730  | 4.046301566237  | 2.016061246009  |
| TV | 7.132605629921  | -0.000000000000 | -0.000000000000 |
| TV | 3.523798964582  | 6.934871364270  | 0.000000000000  |
| TV | 0.263944027088  | -0.656540038160 | 5.914955575576  |

# EQ-CO<sub>2</sub> 201

|    |                |                 |                 |
|----|----------------|-----------------|-----------------|
| C  | 0.222905000708 | -1.813245818812 | -2.203925242880 |
| C  | 0.131406568053 | 0.330600430520  | 1.074438751940  |
| C  | 1.562016355709 | -2.028706820755 | -1.450534285288 |
| C  | 3.816159695240 | -1.256157980426 | -1.616133414773 |
| C  | 3.794785034045 | 0.588917627177  | 2.573381811011  |
| C  | 4.437486421242 | -2.599066140001 | -2.099886516002 |
| O  | 1.462282602990 | -2.371436630812 | 3.617064614424  |
| O  | 0.031742837018 | -1.002075571891 | -3.082606397080 |
| O  | 0.564384745948 | -2.383551591920 | 2.762703039963  |
| O  | 1.759699130766 | -2.809665824524 | -0.544007840733 |
| O  | 3.814011966653 | -3.493354634721 | -2.615041703892 |
| O  | 2.469858433451 | -1.120604133371 | -1.960843047790 |
| O  | 0.676214391880 | 0.186221665779  | 0.071093073362  |
| O  | 5.783196246574 | -2.750692191988 | -1.745429462892 |
| O  | 3.207882466400 | 0.700891828094  | 1.589695962499  |
| O  | 4.752139427498 | -2.321719273851 | 1.011145375195  |
| O  | 4.422938882200 | -0.377303212717 | -1.057118791273 |
| O  | 3.938432159775 | -2.254355409009 | 1.942995293832  |
| TV | 6.472838757628 | 0.000000000000  | -0.000000000000 |
| TV | 0.992413823746 | 5.422572865122  | 0.000000000000  |
| TV | 0.257434183145 | 1.715896680764  | 7.380553278802  |

# EQ-CO<sub>2</sub> 202

|   |                 |                 |                 |
|---|-----------------|-----------------|-----------------|
| C | -0.089842849060 | 1.044695799642  | 2.107543081338  |
| C | 1.175352117088  | 1.237833791877  | 1.197657206991  |
| C | 0.586565545765  | 0.021808781030  | 0.400938050780  |
| C | -0.691046584102 | 0.283523251839  | 6.498610549458  |
| C | 0.583261385508  | 0.465443697398  | 5.599412117153  |
| C | -0.003661330550 | -0.750654071943 | 4.803181713401  |
| O | 0.735422846412  | -3.042210384969 | 1.148657918142  |
| O | -2.799656688381 | -0.700320487065 | 3.267965264582  |
| O | 2.636047103566  | -1.045504737786 | 2.127289014654  |
| O | -0.532632374461 | -0.043603569917 | 1.302078778089  |
| O | -1.135817534869 | -0.803793013316 | 5.690695875125  |
| O | -0.610565445925 | 1.468868973514  | 3.105243435554  |
| O | 0.806590048472  | -0.687938856008 | -0.538641225342 |
| O | -1.216279773376 | 0.713838526954  | 7.491179590501  |
| O | 0.225407203484  | -1.464440973451 | 3.868575383246  |
| O | 0.144856726190  | -3.816265572019 | 5.551081012444  |
| O | -3.429227146290 | -1.340739830332 | 7.765824303394  |
| O | 2.016952083379  | -1.806738255363 | 6.664947467733  |

|    |                 |                 |                 |
|----|-----------------|-----------------|-----------------|
| TV | 5.769784896189  | 0.000000000002  | 0.000000000002  |
| TV | 1.408237696469  | 4.990399016926  | -0.000000000002 |
| TV | -1.204597054765 | -1.529510606924 | 8.797655517550  |

# EQ-CO<sub>2</sub> 203

|    |                 |                 |                 |
|----|-----------------|-----------------|-----------------|
| C  | 1.825399658542  | 2.517086379791  | 1.591346248410  |
| C  | -2.321550887533 | 0.094124249337  | 1.172782443669  |
| C  | -3.308529854570 | 2.420809572803  | -2.010409617580 |
| C  | 2.239305807581  | 6.069300013651  | 1.749927536750  |
| C  | -1.902994389936 | 3.672461925002  | 1.127710335657  |
| C  | -2.992573289962 | 6.017280432953  | -2.011478938062 |
| O  | -1.924604729440 | -0.425138603287 | 2.157954556851  |
| O  | -2.764472365300 | -1.300380257955 | -2.500700089710 |
| O  | -2.747539897194 | 0.611676939136  | 0.197156445802  |
| O  | 0.103878660247  | 1.310784583519  | 0.186992950360  |
| O  | 0.539312808919  | 4.878770632155  | 0.310286043594  |
| O  | -4.339094579914 | 2.766064252945  | -1.541639621429 |
| O  | 1.019821343589  | 1.938715838318  | 0.940704222062  |
| O  | -4.035209422853 | 6.296713256688  | -1.526390133243 |
| O  | 1.438601346691  | 5.506700918207  | 1.080050205404  |
| O  | -1.494908073275 | 3.063643042887  | 2.054836116606  |
| O  | -2.277133925698 | 2.074497890792  | -2.481678261518 |
| O  | -2.333032342635 | 4.278801367152  | 0.205688426726  |
| TV | 6.575990808314  | -0.000000000006 | -0.000000000003 |
| TV | 0.816179916991  | 7.041251367977  | -0.000000000012 |
| TV | 2.976721379801  | 2.342055266456  | 6.242915941154  |

# EQ-CO<sub>2</sub> 204

|    |                 |                 |                 |
|----|-----------------|-----------------|-----------------|
| C  | 0.423042053602  | -1.179188123699 | -0.239077108472 |
| C  | -1.327848698271 | 0.086088281662  | 2.888468391377  |
| C  | 0.834054257076  | 2.200642646867  | -0.087619597432 |
| C  | -1.065029011085 | 3.520977768724  | 2.892896652160  |
| C  | 1.165699148584  | 5.635810008964  | -0.085403567937 |
| C  | -0.749961168907 | 6.898694917576  | 2.893110370562  |
| O  | -2.073153808111 | -0.425968851270 | 3.601692223329  |
| O  | -1.885118386676 | 3.118458437198  | 3.594155289717  |
| O  | 1.773067742050  | -1.248571219631 | -0.134862171727 |
| O  | 2.183614386298  | 2.125008561897  | 0.015392661129  |
| O  | 0.103179486370  | 2.733940707555  | -0.973504720198 |
| O  | 0.871289834578  | 5.004192599648  | 0.975104928815  |
| O  | -0.307934312273 | -0.674634492862 | -1.141635212579 |
| O  | -1.457154918992 | 6.567334858317  | 3.739881405191  |
| O  | 0.541160157122  | 1.553844622549  | 0.965017677735  |
| O  | 2.515345626559  | 5.564226985772  | 0.017978254666  |
| O  | 0.433773249607  | 6.157399291919  | -0.977562178899 |
| O  | 1.120339782676  | 8.478696360464  | 0.834649509338  |
| TV | 3.652257993256  | -0.000000000006 | -0.000000000003 |
| TV | 0.992700847409  | 10.263694394160 | -0.000000000183 |
| TV | -3.445538915519 | 2.266397494557  | 6.523644320305  |

# EQ-CO<sub>2</sub> 205

|   |                 |                 |                 |
|---|-----------------|-----------------|-----------------|
| C | -2.533586926924 | 0.026105856497  | -0.330730288758 |
| C | 0.913481053139  | 1.383459517869  | 0.679746700347  |
| C | -2.132624629358 | -1.529115861191 | 2.980638991433  |
| C | 1.262803361169  | -0.188403806457 | 4.114978308301  |
| C | -2.027335845637 | -2.735291629851 | 6.426162001657  |
| C | 1.534162961790  | -1.377148183600 | 7.603739180377  |

|    |                 |                 |                 |
|----|-----------------|-----------------|-----------------|
| O  | 4.916898012439  | -6.464930550282 | 3.806263017965  |
| O  | 5.173328210002  | -7.542789834391 | 7.118972406340  |
| O  | -2.315551443006 | 1.212837733340  | -0.811245627336 |
| O  | -1.851060945983 | -0.348675425104 | 2.533376202370  |
| O  | -3.163786979886 | -2.205447284129 | 2.669533487882  |
| O  | 0.480846132659  | 0.157952961303  | 4.884636797525  |
| O  | -3.618133678801 | -0.620974687272 | -0.490228878609 |
| O  | 5.534858460642  | -9.027256201146 | 10.463290831969 |
| O  | 0.159594786711  | 1.821708514106  | 1.427950489704  |
| O  | -1.905366843475 | -1.568486659823 | 5.849394855156  |
| O  | -3.082462151582 | -3.435579576530 | 6.310867330099  |
| O  | 0.615596578175  | -0.874396327630 | 8.077457599603  |
| TV | 6.157398301115  | -0.000000000023 | 0.000000000005  |
| TV | -0.027284606329 | 4.382832656981  | -0.000000000007 |
| TV | 0.895883389628  | -4.127193505513 | 10.129015777393 |

# EQ-CO<sub>2</sub> 206

|    |                 |                 |                 |
|----|-----------------|-----------------|-----------------|
| C  | 0.229700583790  | -1.799584925887 | 0.751518295433  |
| C  | -2.551562095469 | -0.034807979302 | -0.813812805136 |
| C  | 0.308251618725  | 1.939915336183  | 0.727537819928  |
| C  | -2.532627732136 | 3.698921135290  | -0.786082883552 |
| C  | 0.299812134779  | 5.672554189975  | 0.766582375596  |
| C  | -2.502577908384 | 7.433660894124  | -0.804114443972 |
| O  | -2.419355014641 | -1.370747977985 | -0.927354407074 |
| O  | -2.386079753083 | 2.361252541401  | -0.840847353133 |
| O  | -1.442116661897 | 0.178291528061  | -1.421921698114 |
| O  | -1.424426803971 | 3.893764904611  | -1.404244016593 |
| O  | 1.022158184495  | 2.667000708908  | 1.261732748858  |
| O  | 2.895835983349  | 4.448603963161  | -0.299610210923 |
| O  | 0.968691494093  | -1.077600036100 | 1.257271286363  |
| O  | -2.357523879954 | 6.095293134228  | -0.840714546189 |
| O  | 2.877713402742  | 0.702344638746  | -0.307445441144 |
| O  | -1.385989070690 | 7.621932845940  | -1.408252930794 |
| O  | 1.045530996527  | 6.397028274565  | 1.259167376935  |
| O  | 2.918798280667  | 8.191619618711  | -0.341892876137 |
| TV | 6.314390614456  | -0.000000000000 | 0.000000000000  |
| TV | 0.063937021631  | 11.197925314307 | 0.000000000000  |
| TV | -0.310477528225 | 0.029722095803  | 3.520456366097  |

# EQ-CO<sub>2</sub> 207

|   |                 |                 |                 |
|---|-----------------|-----------------|-----------------|
| C | -1.725751912310 | -0.273393725312 | -1.918109464932 |
| C | 2.141715130588  | 1.277939434254  | 0.087100357770  |
| C | -1.216127438989 | 3.566845207072  | -1.841669884449 |
| C | 2.612620849683  | 4.966115398138  | -0.011941450873 |
| C | -0.701357169700 | 6.903951289474  | -2.127723454131 |
| C | 3.062548502340  | 8.596229392276  | -0.073483550621 |
| O | 1.184531168963  | 1.690246235008  | 0.827755688542  |
| O | 1.600093484877  | 5.309965115150  | 0.692906736395  |
| O | 1.788300642824  | -0.016621723068 | 0.210831946035  |
| O | 2.359613093445  | 3.655708837145  | 0.084796123889  |
| O | -0.267234295860 | 3.252243820940  | -1.272882871655 |
| O | 3.518406342492  | 5.630917397707  | -0.602054451064 |
| O | -0.880759396802 | 0.121322357124  | -1.245948488988 |
| O | 2.024697884365  | 9.028443595635  | 0.526704295229  |
| O | 3.087408894877  | 1.856565254016  | -0.522192263459 |
| O | 2.668502821121  | 7.307186701085  | -0.080163095840 |
| O | 0.091025393338  | 7.340583894178  | -1.418037670341 |

|    |                 |                 |                 |
|----|-----------------|-----------------|-----------------|
| O  | 4.105069332607  | 9.156504680269  | -0.530922365770 |
| TV | 6.495483751012  | -0.000000000001 | -0.000000000000 |
| TV | 1.730971508356  | 10.917760554196 | -0.000000000009 |
| TV | -0.136204277275 | 0.403790055373  | 3.582890541616  |

# EQ-CO<sub>2</sub> 208

|    |                 |                 |                 |
|----|-----------------|-----------------|-----------------|
| C  | -0.185784682563 | -0.173740433019 | -1.034642113492 |
| C  | -0.940728079222 | 1.298751931449  | 2.579681082004  |
| C  | 3.507671009855  | -0.316112530461 | -0.910709451094 |
| C  | 2.848068054418  | 0.893286280830  | 2.707186859983  |
| C  | 7.144987939017  | -0.582640994799 | -0.792657757833 |
| C  | 6.284186542034  | 1.288195727076  | 2.631623624050  |
| O  | -0.108047182370 | -3.544393084875 | 5.462874099552  |
| O  | 3.519192404737  | -4.036661428866 | 5.748413235034  |
| O  | 0.541138183717  | 0.358474697547  | -0.142820832987 |
| O  | 4.247533608402  | 0.090493275253  | 0.037150636843  |
| O  | 3.756342160271  | -0.927748937719 | -2.004592949921 |
| O  | 2.087749188561  | 1.527267498139  | 2.118796882385  |
| O  | 0.060498743946  | -0.768847657304 | -2.136871718595 |
| O  | 7.149758551536  | -3.567456841696 | 5.425093883437  |
| O  | -1.459576435544 | 1.952205817619  | 1.785932643105  |
| O  | 7.884792120190  | 0.095340710450  | -0.013791784946 |
| O  | 7.377562348194  | -1.357509948606 | -1.779294540646 |
| O  | 5.751988624338  | 1.942059493124  | 1.847607988948  |
| TV | 10.965716150786 | 0.000000000002  | -0.000000000000 |
| TV | -0.365311952075 | 3.565608100321  | -0.000000000000 |
| TV | -2.657390151417 | 0.281056859265  | 6.576973921371  |

# EQ-CO<sub>2</sub> 209

|    |                 |                 |                 |
|----|-----------------|-----------------|-----------------|
| C  | -0.193423759342 | -0.741261764443 | -0.768954065859 |
| C  | -0.687448806917 | -5.890897277174 | -1.218639976123 |
| C  | 2.398359824339  | -0.565028308555 | -0.472315864290 |
| C  | 1.906730392274  | -5.736297995710 | -0.963623241718 |
| C  | 5.027293486086  | -0.646309908988 | -0.602239322004 |
| C  | 4.527798683106  | -5.846080499668 | -1.123163397053 |
| O  | -0.177231186156 | -1.874610389917 | -0.321236578409 |
| O  | 2.398455612582  | -1.474857481985 | 0.332029233000  |
| O  | 0.640897327566  | -2.669606559559 | -3.188577617158 |
| O  | 3.523414769632  | -1.816726503978 | -3.789245477466 |
| O  | 3.572322910286  | -2.193774632755 | -2.600894915119 |
| O  | 1.895081988702  | -4.610315313118 | -1.428888483572 |
| O  | 0.736738381186  | -1.436311976674 | -3.337411700543 |
| O  | 5.046754290682  | -1.565370748737 | 0.190954269033  |
| O  | -0.692148305536 | -4.923809157316 | -1.953655919063 |
| O  | 5.656812081363  | -1.923558135415 | -3.910239322056 |
| O  | 5.702295274523  | -2.294455328276 | -2.720430179430 |
| O  | 4.510692695314  | -4.936288537029 | -1.927194284152 |
| TV | 7.844426903445  | -0.000000000000 | -0.000000000001 |
| TV | -0.824068303001 | 5.878153338700  | 0.000000000000  |
| TV | 0.330479626249  | -2.374234805164 | 4.774411759781  |

# EQ-CO<sub>2</sub> 210

|   |                 |                 |                |
|---|-----------------|-----------------|----------------|
| C | 0.912629388461  | 0.281004744326  | 1.388399301746 |
| C | -1.777145726896 | -1.881688933135 | 1.456606870006 |
| C | -0.085411172059 | -0.317899667238 | 4.943531835221 |
| C | -2.797987337382 | -2.320365628349 | 5.222931076496 |
| C | -0.876288183873 | -1.508448417224 | 8.835561376936 |

|    |                 |                 |                 |
|----|-----------------|-----------------|-----------------|
| C  | -3.589879897976 | -3.670532153207 | 8.885048539873  |
| O  | -2.839130553835 | -1.446728530091 | 0.745460247234  |
| O  | -3.699724845389 | -1.519453921797 | 4.611896269926  |
| O  | -2.476983178925 | -0.997800182492 | 2.211991334644  |
| O  | -3.261119301683 | -1.428187877574 | 6.128613188743  |
| O  | 0.386766366922  | 0.308909640226  | 5.828049971233  |
| O  | -0.531566613002 | -0.963898232545 | 4.057945797050  |
| O  | 1.292521778158  | 0.875807798631  | 2.338817770872  |
| O  | -4.547971383692 | -2.938300462215 | 8.270574373488  |
| O  | 0.563984751677  | -0.334174782592 | 0.438589017587  |
| O  | -4.104904142402 | -2.796951278172 | 9.778309463427  |
| O  | -0.429521648817 | -0.868839021673 | 9.724554827400  |
| O  | -1.296060642283 | -2.161025948193 | 7.942168911860  |
| TV | 6.279217461921  | 0.000000000001  | -0.000000000005 |
| TV | 0.048898978601  | 3.580963102410  | -0.000000000002 |
| TV | -2.588433923114 | -2.488282065118 | 11.281894585249 |

# EQ-CO<sub>2</sub> 211

|    |                 |                 |                 |
|----|-----------------|-----------------|-----------------|
| C  | 1.048405035796  | 0.223164475474  | -0.935012413704 |
| C  | 3.011366384057  | -2.216399585808 | 1.703882730741  |
| C  | 1.531991608176  | 3.856241714872  | -0.942636665938 |
| C  | 3.453709168144  | 1.440569317258  | 1.700258691600  |
| C  | 2.002837552523  | 7.519648374386  | -0.947294931207 |
| C  | 3.945622932987  | 5.090674140194  | 1.703206312910  |
| O  | 0.766626390871  | 1.021395826539  | -0.153287100914 |
| O  | 1.362898130425  | 4.678509177212  | -0.153462910448 |
| O  | 0.404805612744  | -0.572710901833 | 2.310060603692  |
| O  | 0.868818732240  | 3.083120594554  | 2.307163962687  |
| O  | -1.194622299227 | 2.833776166251  | -1.972105477193 |
| O  | -1.816996631819 | 2.162141999494  | 0.816225391004  |
| O  | -1.658902733326 | -0.824106704961 | -1.970695473027 |
| O  | 1.829143015927  | 8.335164227928  | -0.152145463920 |
| O  | -2.262740808006 | -1.495346906680 | 0.818816833602  |
| O  | 1.339375989322  | 6.736481299962  | 2.308528827503  |
| O  | -0.722866682560 | 6.486689592771  | -1.970726483621 |
| O  | -1.328739492951 | 5.813316576274  | 0.819333321895  |
| TV | 5.426058006932  | 0.000000000006  | 0.000000000042  |
| TV | 1.400528420765  | 10.963544128392 | 0.000000000011  |
| TV | 1.796289527274  | -0.452305220175 | 5.267053422886  |

# EQ-CO<sub>2</sub> 212

|   |                 |                 |                 |
|---|-----------------|-----------------|-----------------|
| C | 1.854546527904  | 1.873962363532  | 2.390222304111  |
| C | 4.355980832175  | 1.420592373933  | -0.065856365622 |
| C | 1.454614786468  | 5.412390582431  | 2.371701210088  |
| C | 3.933808530124  | 4.978103823576  | -0.092347904349 |
| C | 1.001153058904  | 8.933471874441  | 2.371702776119  |
| C | 3.505826137737  | 8.472977387639  | -0.090519796886 |
| O | 1.168585060770  | 1.062869689902  | -1.942505979646 |
| O | 0.726962013432  | 4.583043165006  | -1.931157637815 |
| O | 1.595277177124  | 0.411904866129  | -0.976371076679 |
| O | 1.167821383189  | 3.935004485369  | -0.969673439407 |
| O | 1.469844114480  | 2.449959902416  | 1.469436662892  |
| O | -1.410524805325 | 4.390419946711  | 0.820784018953  |
| O | 1.892556741222  | -1.035384795499 | 1.464745999945  |
| O | 0.313732607081  | 8.135984178781  | -1.944339962732 |
| O | -0.969236401833 | 0.811989711590  | 0.824916245932  |
| O | 0.737806002458  | 7.480610575809  | -0.979978637285 |



|    |                 |                 |                |
|----|-----------------|-----------------|----------------|
| O  | 1.037297901456  | 5.972434037118  | 1.455422302397 |
| O  | -1.830267649296 | 7.887521650189  | 0.820436864455 |
| TV | 5.729343043054  | -0.000000000000 | 0.000000000000 |
| TV | -1.285337134440 | 10.560079868468 | 0.000000000003 |
| TV | -1.845717180310 | -1.697661550803 | 5.205682112285 |

# EQ-CO<sub>2</sub> 213

|    |                 |                 |                 |
|----|-----------------|-----------------|-----------------|
| C  | 1.135623303860  | 1.447281126664  | 0.408973599120  |
| C  | 0.843562391534  | 0.472388753861  | -0.560966905492 |
| C  | -0.063240184042 | -0.709724123036 | -0.309004350181 |
| C  | 1.992307316533  | 0.563243047261  | 5.669990723639  |
| C  | 1.701157164708  | -0.411943573527 | 4.700133646886  |
| C  | 0.793726187077  | -1.593606361180 | 4.951587316986  |
| O  | -1.072057319788 | 1.195465562767  | -3.437760404768 |
| O  | 1.325572576235  | 0.707716604842  | -1.784751889459 |
| O  | -1.218417501803 | -0.771899120128 | -0.671311686853 |
| O  | 0.622465529975  | 1.384653796482  | 1.637288992046  |
| O  | 1.478255718956  | 0.501087878232  | 6.897966277957  |
| O  | 1.104055067525  | -0.262546343084 | -2.687173375721 |
| O  | 1.921655522285  | 2.525179595219  | 0.168158960850  |
| O  | 1.963663232270  | -1.147479613208 | 2.574431788332  |
| O  | 2.778134582986  | 1.641283237062  | 5.429165266113  |
| O  | -0.213099156623 | 0.311970962261  | 1.823829998437  |
| O  | 2.183967220014  | -0.176741398033 | 3.476628592196  |
| O  | -0.361329426590 | -1.655693118798 | 4.588907558081  |
| TV | 4.625680288222  | -0.000000000001 | -0.000000000003 |
| TV | 1.248925239365  | 4.350627233061  | 0.000000000008  |
| TV | 1.714989214408  | -1.767079854892 | 10.522327613413 |

# EQ-CO<sub>2</sub> 214

|    |                 |                 |                 |
|----|-----------------|-----------------|-----------------|
| C  | 0.655510489965  | 1.013323409325  | -0.255218195750 |
| C  | -3.376308184849 | -1.028251919131 | -2.023050689594 |
| C  | -2.206086624328 | -0.052735735629 | -1.759976107589 |
| C  | 0.359248870097  | 0.875381265149  | 3.960689388899  |
| C  | -3.672566703290 | -1.165996843451 | 2.192916502923  |
| C  | -2.502429894303 | -0.190467125243 | 2.456106980356  |
| O  | -1.712596661050 | -0.904023198948 | -0.771886297957 |
| O  | -0.379184634776 | 1.849925976047  | -0.283405379728 |
| O  | 0.805100111498  | 1.715471346335  | 0.871468141695  |
| O  | -2.869711483147 | -1.879879343396 | -1.024935874681 |
| O  | -3.165834681271 | -2.017761990121 | 3.190878033854  |
| O  | 0.434504068319  | -1.194852311999 | -2.741129020138 |
| O  | -1.696516798255 | 0.958915110030  | -2.197107704214 |
| O  | 0.138397626869  | -1.332752675929 | 1.474666993631  |
| O  | -1.992960448646 | 0.821200179071  | 2.018943746581  |
| O  | -2.008855320658 | -1.041809751700 | 3.444127824337  |
| O  | -0.675393633789 | 1.712107632254  | 3.932528007921  |
| O  | 0.508992977365  | 1.577546346201  | 5.087305073823  |
| TV | 4.757365556944  | -0.000000000007 | 0.000000000044  |
| TV | -0.220708460789 | 5.722459630318  | 0.000000000103  |
| TV | -0.592460501627 | -0.275606423846 | 8.431980802505  |

# EQ-CO<sub>2</sub> 215

|   |                |                |                |
|---|----------------|----------------|----------------|
| C | 1.042595752042 | 1.501067482103 | 0.374507277540 |
| C | 1.693937826505 | 0.392828657965 | 0.570188631000 |
| C | 0.569868621400 | 2.709977328034 | 0.328133036816 |
| C | 1.731335040734 | 3.635974683667 | 3.380281936643 |

|    |                 |                 |                 |
|----|-----------------|-----------------|-----------------|
| C  | 2.417685456348  | 2.546228327759  | 3.202649497257  |
| C  | 1.209376779817  | 4.819981364248  | 3.237069584728  |
| O  | -2.857433130936 | 2.844348989535  | 0.354081344388  |
| O  | -0.684333811048 | -1.634378886947 | 0.989814102268  |
| O  | 2.257168660060  | -0.638569638413 | 0.721538479796  |
| O  | 0.108928543256  | 3.802057968501  | 0.263072432723  |
| O  | 0.709032896775  | 5.890332898631  | 3.158037327570  |
| O  | -1.557682992413 | -1.077847564973 | 0.306066431525  |
| O  | -2.438430743800 | 1.741902657280  | -0.032580291563 |
| O  | -0.093931989148 | 0.768139916931  | 3.292917902155  |
| O  | -1.713116319032 | 3.901309231704  | 3.006720853742  |
| O  | -2.131620250322 | 5.016489086036  | 3.356028535952  |
| O  | -1.102243663239 | 1.004763255852  | 2.608946882570  |
| O  | 3.016126437744  | 1.529574154374  | 3.081191718867  |
| TV | 6.923025661005  | 0.000000000000  | 0.000000000006  |
| TV | -3.208798413355 | 7.142704734237  | -0.000000000004 |
| TV | 1.181484985480  | 5.447181925729  | 5.483866177750  |

# EQ-CO<sub>2</sub> 216

|    |                 |                 |                 |
|----|-----------------|-----------------|-----------------|
| C  | 1.069378487139  | 3.913439276769  | -1.409062394011 |
| C  | 0.580493067572  | 5.093032334737  | -1.161200327875 |
| C  | -1.825465314925 | 2.747082330544  | -1.244732136543 |
| C  | 4.507344004911  | 3.915790244796  | -1.409696196434 |
| C  | 4.021434662880  | 5.096153525671  | -1.158717563678 |
| C  | 1.615642148959  | 2.743989501657  | -1.242754401391 |
| O  | 0.313409172142  | 1.199355368810  | 1.296792239794  |
| O  | 0.987342189853  | 0.974045947156  | 2.314499252298  |
| O  | -0.824957803035 | 4.029093451705  | 1.477087551037  |
| O  | -1.325626771517 | 1.678286281955  | -1.152211218560 |
| O  | 2.114486430289  | 1.674863744691  | -1.149154773315 |
| O  | -0.366567652766 | 5.075102376537  | 1.964635619575  |
| O  | 0.139663509115  | -0.710024557726 | -0.990240162062 |
| O  | 2.941908435784  | 5.228821588156  | 1.969088412718  |
| O  | 3.582542392825  | -0.706122242933 | -0.986367622715 |
| O  | 3.767956070674  | 1.334336965634  | 1.308770197240  |
| O  | 4.415375640242  | 0.974670761450  | 2.305071375424  |
| O  | 2.616980844421  | 4.137349812678  | 1.474767634538  |
| TV | 6.881599540932  | -0.000000000000 | -0.000000000000 |
| TV | -0.029062131266 | 6.876288428847  | 0.000000000000  |
| TV | 0.505837602548  | -0.193595808852 | 5.910191557187  |

# EQ-CO<sub>2</sub> 217

|   |                 |                 |                 |
|---|-----------------|-----------------|-----------------|
| C | 1.430301363464  | -0.101583432742 | -0.886528176747 |
| C | 0.922848006329  | -1.432681414326 | -0.365797535804 |
| C | 0.670305668925  | -1.878074827997 | 0.887036240764  |
| C | 0.808784006199  | -1.211124696052 | 2.237388292341  |
| C | 0.301240805142  | -2.542208059969 | 2.757809476849  |
| C | 0.048649486644  | -2.987527306300 | 4.010648216494  |
| O | -2.199303179126 | -2.441352792442 | -0.439793967123 |
| O | 1.761252701799  | 0.981109483562  | -0.445645050903 |
| O | -2.219462383050 | 0.374875872291  | -0.772652913834 |
| O | 0.183206532594  | -3.080380625183 | 1.455939604839  |
| O | -0.438435447148 | -4.189697144139 | 4.579795911832  |
| O | -3.122316139768 | 3.236845680668  | -1.249715663631 |
| O | -1.400894310747 | 0.508290054752  | 0.151779197373  |
| O | -3.743916945002 | 2.127666437742  | 1.873726585511  |
| O | -2.021967381161 | -0.601440714016 | 3.275132046911  |

|    |                 |                 |                |
|----|-----------------|-----------------|----------------|
| O  | -2.822590902836 | -3.550619036924 | 2.685574505952 |
| O  | 1.139771784198  | -0.128566178053 | 2.678548618278 |
| O  | -2.841193215619 | -0.734355293029 | 2.351195470131 |
| TV | 6.860658225008  | 0.000000000004  | 0.000000000000 |
| TV | 0.016484139389  | 5.705772548162  | 0.000000000007 |
| TV | -1.243062652527 | -2.218690072946 | 6.247399929329 |

# EQ-CO<sub>2</sub> 218

|    |                 |                 |                 |
|----|-----------------|-----------------|-----------------|
| C  | 2.437858767239  | 0.807731878416  | -0.534596404803 |
| C  | 5.701410626914  | 1.733463987222  | 1.604849527869  |
| C  | 2.650608825370  | 1.976071197559  | -1.265144785576 |
| C  | 0.922964668702  | 4.355219518666  | -0.543683183012 |
| C  | 4.215199851660  | 5.378930156328  | 1.679311486323  |
| C  | 1.152234351378  | 5.528604170927  | -1.261227526596 |
| O  | 4.714526217359  | 1.317914348437  | -2.134026857154 |
| O  | 3.685445313171  | 2.213578311154  | -1.998962296449 |
| O  | 1.864548763606  | 0.081162009470  | 0.186664344925  |
| O  | -0.822264960663 | 0.381274785063  | -0.648858290698 |
| O  | -2.359342632886 | 3.977977553055  | -0.807185827054 |
| O  | 4.745979245381  | 1.590641141468  | 0.980254666485  |
| O  | -0.497494479944 | 1.362217211577  | -1.334632828087 |
| O  | 3.333103101698  | 5.147675209231  | 0.978969010713  |
| O  | -1.972704186087 | 5.044816010138  | -1.308099794926 |
| O  | 3.260941449961  | 4.989748283049  | -2.125398708170 |
| O  | 2.186873654058  | 5.829325820923  | -1.972690604697 |
| O  | 0.295591396650  | 3.655664685029  | 0.166100980148  |
| TV | 7.974162873167  | 0.000000000000  | 0.000000000000  |
| TV | -3.261065420282 | 7.255831256930  | 0.000000000000  |
| TV | -1.802216285890 | -1.871691382926 | 4.968780656649  |

## (ii) SiO<sub>2</sub> at 1 atm

### # EQ-SiO<sub>2</sub> 0

|    |                  |                  |                 |
|----|------------------|------------------|-----------------|
| O  | -5.066345139082  | -0.311255880109  | 0.012262618204  |
| O  | 0.555938052959   | -2.460483463813  | 0.219081400968  |
| O  | 1.793591436244   | -0.275713819303  | -0.582531143028 |
| O  | 7.976331352671   | 5.288818083464   | 0.291810692031  |
| O  | -6.155151922787  | -4.811327708675  | 2.066989350238  |
| O  | -0.532619016547  | -6.960904469291  | 2.273576928748  |
| O  | 0.704824518546   | -4.775939130243  | 1.472158917528  |
| O  | 6.887844512787   | 0.788162932053   | 2.346974134157  |
| O  | -7.244047627250  | -9.311606499647  | 4.121588899401  |
| O  | -1.621648937379  | -11.460794086202 | 4.327902890834  |
| O  | -0.383817592551  | -9.276232866367  | 3.526544705467  |
| O  | 5.798906541422   | -3.712051429629  | 4.401453017024  |
| Si | -13.005319908634 | -8.090534669691  | 3.074711721560  |
| Si | 0.824839877647   | -6.035313840154  | 2.543330680987  |
| Si | -0.264000607650  | -10.535522484224 | 4.597800605075  |
| Si | -10.827645032080 | 0.910061298995   | -1.034591197922 |
| Si | -11.916617079284 | -3.590310923550  | 1.020080844567  |
| Si | 1.913445378186   | -1.534966137153  | 0.488683689405  |
| TV | 11.553055294360  | 0.000000000012   | 0.000000000011  |
| TV | -3.481779053152  | 3.790149355328   | 0.000000000046  |
| TV | -3.266725438038  | -13.500368987228 | 6.163709658005  |

### # EQ-SiO<sub>2</sub> 1

|    |                 |                 |                 |
|----|-----------------|-----------------|-----------------|
| O  | -3.311461122391 | 2.983340494323  | 0.540250614344  |
| O  | 5.677520922150  | -3.047900015225 | -1.716886753247 |
| O  | -1.926122412771 | 1.108974317154  | 0.534212312992  |
| O  | -0.773157743127 | -0.338189075541 | -1.257659084963 |
| O  | -4.785190203322 | 1.886179761085  | 2.567581819794  |
| O  | 4.201911319143  | -4.145478741048 | 0.308080631486  |
| O  | -3.400843605085 | 0.010956898283  | 2.560405917533  |
| O  | -2.249002644418 | -1.435536095229 | 0.767466163301  |
| O  | -6.262442587939 | 0.785818951747  | 4.589834804521  |
| O  | 2.726948425280  | -5.243261224257 | 2.331263396484  |
| O  | -4.878398850112 | -1.088928035530 | 4.582769924429  |
| O  | -3.724298904585 | -2.535454539114 | 2.791040795931  |
| Si | -6.308661783625 | -0.701686880680 | 5.599024763126  |
| Si | -2.295732402576 | -1.471186944255 | 2.562102042593  |
| Si | -3.773163366310 | -2.571039144512 | 4.586193577183  |
| Si | -3.356294872991 | 1.497433303763  | 1.550019363798  |
| Si | -4.832391478702 | 0.397008775003  | 3.574149809118  |
| Si | -0.820696828910 | -0.372461053130 | 0.536827706911  |
| TV | 5.064757769057  | 0.000000000011  | 0.000000000010  |
| TV | -3.594435883825 | 4.836716891629  | 0.000000000061  |
| TV | -4.428188321652 | -3.296432883664 | 6.074032934469  |

### # EQ-SiO<sub>2</sub> 2

|   |                 |                 |                 |
|---|-----------------|-----------------|-----------------|
| O | -4.435267514480 | -2.167310119317 | 1.136479706496  |
| O | 1.560255431117  | 0.018502761567  | -0.783328960738 |
| O | -0.672545763905 | 1.510910022994  | -0.862715570033 |
| O | 6.149155117487  | 2.425680669988  | 1.146295617851  |
| O | -5.617640094888 | -6.490865196934 | 3.609046678615  |
| O | 0.377844101754  | -4.305047771935 | 1.689220976693  |
| O | -1.854923699830 | -2.812618846852 | 1.609842486730  |

|    |                 |                  |                 |
|----|-----------------|------------------|-----------------|
| O  | 4.966781683520  | -1.897868078615  | 3.618866249092  |
| O  | -6.800013442379 | -10.814388823133 | 6.081630912099  |
| O  | -0.804536870733 | -8.628594302041  | 4.161819363721  |
| O  | -3.037295120118 | -7.136153041076  | 4.082422665804  |
| O  | 3.784389359052  | -6.221422197159  | 6.091438365220  |
| Si | -9.788079018033 | -10.169525480920 | 4.483651174233  |
| Si | -0.238659611110 | -2.793247084016  | 1.998458123629  |
| Si | -1.421031144764 | -7.116788343809  | 4.471043044667  |
| Si | -7.423313959285 | -1.522425661843  | -0.461492867073 |
| Si | -8.605696986021 | -5.845980316276  | 2.011074512167  |
| Si | 0.943717164301  | 1.530294292362   | -0.474102925054 |
| TV | 8.447057875356  | 0.000000000011   | 0.000000000010  |
| TV | -2.922703326656 | 4.081558734153   | 0.000000000051  |
| TV | -3.547127796083 | -12.970638247093 | 7.417718263976  |

# EQ-SiO<sub>2</sub> 3

|    |                  |                 |                 |
|----|------------------|-----------------|-----------------|
| O  | -4.082098847071  | -1.502294524801 | 0.807643002734  |
| O  | 1.415619243739   | -0.027209520969 | 0.297362091719  |
| O  | -0.048687136893  | 2.010619527925  | -0.992610480056 |
| O  | 6.923867384868   | 1.440774751160  | 0.807008208059  |
| O  | -7.018002432024  | 2.578954319336  | 0.807500648451  |
| O  | -1.520783192805  | 4.053916461539  | 0.296956724064  |
| O  | -2.984981192008  | 6.091737926746  | -0.993039518173 |
| O  | 3.986978931429   | 5.520957460820  | 0.806393884662  |
| O  | -9.954211425728  | 6.659853089105  | 0.807530585502  |
| O  | -4.457071310084  | 8.134778376963  | 0.297100718552  |
| O  | -5.921338808923  | 10.172541080861 | -0.992797116352 |
| O  | 1.051727626392   | 9.602257450981  | 0.807193989751  |
| Si | -13.286245546400 | 6.609403767166  | -0.374119934649 |
| Si | -1.528891226884  | 5.576634464393  | -0.376172580881 |
| Si | -4.465264644425  | 9.657484935106  | -0.376201404821 |
| Si | -7.413558907998  | -1.552520705314 | -0.373979044297 |
| Si | -10.349945082386 | 2.528460504877  | -0.374149453857 |
| Si | 1.407662958047   | 1.495489972159  | -0.376031102702 |
| TV | 8.845626251763   | 0.000000000010  | 0.000000000009  |
| TV | -8.808825816362  | 12.242882694362 | 0.000000000138  |
| TV | -1.486681650523  | -4.088755420662 | 2.430701362113  |

# EQ-SiO<sub>2</sub> 4

|    |                 |                 |                 |
|----|-----------------|-----------------|-----------------|
| O  | -2.255287979582 | 2.239036867190  | 0.518056401454  |
| O  | 3.335632887425  | -1.012516138933 | -2.447007414850 |
| O  | -1.587875884590 | -0.333644967583 | 0.978444198655  |
| O  | 0.325508087724  | 0.090269176889  | -0.949421851257 |
| O  | -4.962468221060 | 6.557568995614  | 0.502639742889  |
| O  | 0.561414585572  | 3.446078446424  | -2.424045632230 |
| O  | -4.253047257451 | 3.989039794271  | 0.945765259812  |
| O  | -2.353207230810 | 4.449601525291  | -1.002017146261 |
| O  | -7.663918372264 | 10.967791332415 | 0.586373906200  |
| O  | -2.107933024718 | 7.753152624597  | -2.450878884525 |
| O  | -6.885345807214 | 8.403208691935  | 0.999532690581  |
| O  | -5.021139104575 | 8.754186666081  | -1.013551252822 |
| Si | -7.821196408099 | 9.642766205291  | 1.575676858992  |
| Si | -2.656744096322 | 3.849435012209  | 0.516033360683  |
| Si | -5.313801308606 | 8.182275561492  | 0.520179606747  |
| Si | -2.481960171028 | 0.949676920295  | 1.536863686541  |
| Si | -5.152925546953 | 5.261856643824  | 1.523490409340  |
| Si | 0.013803032125  | -0.494721611808 | 0.572428592442  |

|    |                 |                 |                |
|----|-----------------|-----------------|----------------|
| TV | 4.964466609620  | 0.000000000011  | 0.000000000010 |
| TV | -8.082723692051 | 13.070238719335 | 0.000000000182 |
| TV | 0.345152351001  | -3.017900187858 | 4.052902017824 |

# EQ-SiO<sub>2</sub> 5

|    |                 |                 |                 |
|----|-----------------|-----------------|-----------------|
| O  | -2.146531303794 | -5.511802370269 | 2.840695911932  |
| O  | 0.585430641201  | -2.833566526815 | 1.191000360106  |
| O  | -2.146154326858 | 1.649716937372  | 0.668394906693  |
| O  | 0.581599604923  | -1.094426472304 | -1.380269803244 |
| O  | -2.145898856961 | 3.332989165704  | -0.962479377210 |
| O  | -3.512725596923 | -0.518109412492 | 1.086421747920  |
| O  | 0.588179273842  | -5.511983301029 | 2.840916292909  |
| O  | 3.320025849268  | -2.833608713417 | 1.191122638685  |
| O  | 0.588532227743  | 1.649712749217  | 0.668366974251  |
| O  | 3.316330011419  | -1.094656017597 | -1.380327104453 |
| O  | 0.588855971124  | 3.332923641368  | -0.962546759459 |
| O  | -0.777997889419 | -0.518269132398 | 1.086608982231  |
| Si | 1.956555765985  | 2.491333236950  | -0.147195934064 |
| Si | -3.514996938535 | -2.075831935475 | 2.110163576465  |
| Si | -0.781555243506 | -6.268573804296 | 1.921868837193  |
| Si | -0.780346205645 | -2.076023392192 | 2.110155187080  |
| Si | -0.778098062447 | 2.491335372736  | -0.147258838250 |
| Si | 1.952993053516  | -6.268480143101 | 1.921876941534  |
| TV | 5.469245989299  | 0.000000000002  | 0.000000000002  |
| TV | -1.363768607897 | 6.594185110277  | 0.000000000001  |
| TV | -2.729116695343 | -0.138140338284 | 4.325104630021  |

# EQ-SiO<sub>2</sub> 6

|    |                 |                 |                 |
|----|-----------------|-----------------|-----------------|
| O  | -1.934702529425 | -4.162881440319 | 2.873973370840  |
| O  | 0.490743010673  | -3.094946878791 | 1.089213189464  |
| O  | -1.455822774824 | 0.527719171736  | 0.329750686517  |
| O  | 1.305984924329  | -1.260684213772 | -1.876237821167 |
| O  | -1.460425254232 | 3.070140417763  | -0.635748111557 |
| O  | -3.558983275342 | -0.555669295462 | 1.571043216720  |
| O  | -4.361876963407 | -4.187936689532 | 7.138143230911  |
| O  | -1.936383676822 | -3.120282909599 | 5.353214990407  |
| O  | -3.883173506603 | 0.502764205637  | 4.594022894878  |
| O  | -1.121261517801 | -1.286001196388 | 2.388065729108  |
| O  | -3.887950845292 | 3.044956308050  | 3.628617058121  |
| O  | -5.986321965990 | -0.580802648745 | 5.835160411025  |
| Si | -2.927300778759 | 1.774147973157  | 4.111277225680  |
| Si | -4.439551358268 | -1.830793042056 | 2.166743682333  |
| Si | -1.990235187764 | -5.425614748634 | 1.796109431604  |
| Si | -6.866782120638 | -1.856070752814 | 6.430805903133  |
| Si | -0.500029082424 | 1.799318997996  | -0.152815057501 |
| Si | -4.417477638409 | -5.450809351683 | 6.060327520109  |
| TV | 4.866430379421  | 0.000000000001  | 0.000000000001  |
| TV | -0.020736462875 | 5.411521420490  | 0.000000000001  |
| TV | -4.854535710362 | -0.050627846951 | 8.528383500884  |

# EQ-SiO<sub>2</sub> 7

|   |                 |                 |                 |
|---|-----------------|-----------------|-----------------|
| O | -2.854243850932 | -5.546257395540 | 3.840614651551  |
| O | -0.418829460159 | -3.061454097080 | 0.628016504114  |
| O | -2.392890262301 | 0.535338579581  | 1.269100656824  |
| O | 1.725241104776  | -1.132543766081 | -1.723623670626 |
| O | -2.388087482266 | 1.729694907764  | -1.108582499506 |
| O | -3.118204174377 | -2.024338077762 | 1.884372657794  |

|    |                 |                 |                |
|----|-----------------|-----------------|----------------|
| O  | -5.284825640215 | -5.578499414044 | 8.152098498212 |
| O  | -2.849424913110 | -3.093716956901 | 4.939396746273 |
| O  | -4.823365636066 | 0.503158546131  | 5.580788628809 |
| O  | -0.705368609275 | -1.164690839062 | 2.587673321872 |
| O  | -4.818626008308 | 1.697419538074  | 3.202931576420 |
| O  | -5.548675452621 | -2.056615377557 | 6.195651215916 |
| Si | -3.829594307736 | 1.099158324553  | 4.392754879317 |
| Si | -4.692761588915 | -2.503949251576 | 2.081690077755 |
| Si | -2.276562651983 | -6.101061370568 | 2.392544431996 |
| Si | -7.123283644892 | -2.536153022933 | 6.393011999941 |
| Si | -1.399009195706 | 1.131498347722  | 0.081256628682 |
| Si | -4.707079255155 | -6.133376573891 | 6.704079496825 |
| TV | 4.832065802012  | 0.000000000001  | 0.000000000001 |
| TV | -0.002608774109 | 5.418696937902  | 0.000000000001 |
| TV | -4.861109302892 | -0.064479040728 | 8.622833623304 |

# EQ-SiO<sub>2</sub> 8

|    |                 |                 |                 |
|----|-----------------|-----------------|-----------------|
| O  | -2.525387506156 | 2.231707194191  | 0.393354443416  |
| O  | 2.996017983332  | -0.875477491795 | -2.442506542593 |
| O  | -1.798463564476 | -0.300818889004 | 0.922394092383  |
| O  | 0.033598913667  | 0.242793668515  | -1.059301966254 |
| O  | -2.018175413160 | -0.728231212275 | 4.405115175780  |
| O  | 3.461675935890  | -3.739888925605 | 1.535959539822  |
| O  | -1.285711807559 | -3.260099586189 | 4.980327276654  |
| O  | 0.511740871032  | -2.712504733683 | 2.970024390053  |
| O  | -1.526505125538 | -3.667328156666 | 8.416983598699  |
| O  | 3.975447022899  | -6.704706616089 | 5.570645483709  |
| O  | -0.784563073924 | -6.202836531043 | 9.011924206990  |
| O  | 1.012162786603  | -5.629460305450 | 6.995203011813  |
| Si | -1.705998043159 | -4.909980243084 | 9.507154320082  |
| Si | 0.299441841248  | -3.353269783796 | 4.486613557932  |
| Si | 0.798154108653  | -6.289969857690 | 8.508618154642  |
| Si | -2.711382185632 | 0.977765681662  | 1.465049371975  |
| Si | -2.201330345723 | -1.970711865873 | 5.495271487552  |
| Si | -0.206432622012 | -0.394889470604 | 0.454692348973  |
| TV | 4.991043912097  | 0.000000000013  | 0.000000000012  |
| TV | -2.765932917828 | 4.223092710011  | 0.000000000060  |
| TV | 1.481662100968  | -8.786042391020 | 12.049935814610 |

# EQ-SiO<sub>2</sub> 9

|    |                 |                 |                 |
|----|-----------------|-----------------|-----------------|
| O  | 1.476417774772  | 1.336990347040  | 0.452902577128  |
| O  | -0.448243252745 | -2.915740463049 | -3.013977986453 |
| O  | -0.954498764853 | 0.598190996936  | 1.568374748052  |
| O  | -1.484571051068 | 0.097469580115  | -0.994173487074 |
| O  | 1.340937762597  | -1.338456286229 | 4.417450241930  |
| O  | -0.539074620754 | -5.642899258326 | 1.026237681214  |
| O  | -1.083869338857 | -1.997737262273 | 5.597480446842  |
| O  | -1.574921418842 | -2.614208413140 | 3.039591171713  |
| O  | 1.334858783515  | -4.167453203409 | 8.498979561277  |
| O  | -0.613890893869 | -8.272652855508 | 5.121584852899  |
| O  | -1.096908054062 | -4.915265021018 | 9.641234804400  |
| O  | -1.617030493240 | -5.378260085836 | 7.050985719895  |
| Si | 0.126238678773  | -3.788323790472 | 9.573237382604  |
| Si | -2.273479151049 | -2.457607533161 | 4.538727944419  |
| Si | -2.303464850851 | -5.314380550340 | 8.564981389293  |
| Si | 0.265335711368  | 1.722754697900  | 1.519652718520  |
| Si | 0.182721671681  | -0.932124420529 | 5.543392212041  |

|    |                 |                 |                 |
|----|-----------------|-----------------|-----------------|
| Si | -2.169868706176 | 0.186251076368  | 0.514211949100  |
| TV | 4.839890553327  | 0.000000000033  | 0.000000000070  |
| TV | 2.507238528301  | 4.411010287156  | 0.000000000063  |
| TV | -0.219276633372 | -8.233675652939 | 12.084446064847 |

# EQ-SiO<sub>2</sub> 10

|    |                 |                 |                 |
|----|-----------------|-----------------|-----------------|
| O  | -2.835844446871 | -5.276188877616 | 3.280039512223  |
| O  | 0.003567146324  | -3.862944971040 | 1.299141565478  |
| O  | -2.073949793743 | 0.251728999122  | 0.592866969354  |
| O  | 2.016855759704  | -1.181117149691 | -2.049987747562 |
| O  | -1.397877399762 | 2.546659983628  | -0.617591333893 |
| O  | -3.333759393338 | -1.878627814059 | 1.506656759624  |
| O  | 2.275998425779  | -5.305785022279 | 3.306103773219  |
| O  | 5.139338054417  | -3.857402148176 | 1.300796228034  |
| O  | 3.040330115449  | 0.268381619979  | 0.622560719424  |
| O  | 7.147820700770  | -1.175408048944 | -2.046668394721 |
| O  | 3.733626056367  | 2.539793882209  | -0.616699370657 |
| O  | 1.806507328449  | -1.893849593540 | 1.506155910857  |
| Si | 4.323419250974  | 1.139752455044  | 0.037225457003  |
| Si | -4.698274595267 | -2.527364788761 | 2.183242749225  |
| Si | -2.405896315223 | -6.106109606329 | 1.917848705085  |
| Si | 0.437623840494  | -2.535084920738 | 2.182552153198  |
| Si | -0.798551088871 | 1.143468640422  | 0.022344721874  |
| Si | 2.718367395689  | -6.110183782229 | 1.933126469026  |
| TV | 10.268188651532 | 0.000000000002  | 0.000000000002  |
| TV | 0.193215520969  | 5.370897845308  | 0.000000000001  |
| TV | -2.756199705885 | -0.208314426128 | 4.341294081108  |

# EQ-SiO<sub>2</sub> 11

|    |                 |                 |                 |
|----|-----------------|-----------------|-----------------|
| O  | -2.658764176200 | -4.784775687884 | 3.195030421388  |
| O  | 0.079564388060  | -3.326969425446 | 1.136951433566  |
| O  | -1.970327843472 | 0.664654652152  | 0.507105300128  |
| O  | 2.151727017057  | -0.564353055451 | -2.192146590923 |
| O  | -1.505171724402 | 2.976040200436  | -0.740393780743 |
| O  | -3.064389092787 | -1.527085509485 | 1.577226787014  |
| O  | 2.392444436331  | -4.784864295963 | 3.195255557877  |
| O  | 5.130815772371  | -3.326944719213 | 1.136953875399  |
| O  | 3.080810105837  | 0.664690715696  | 0.507211829074  |
| O  | 7.203101086006  | -0.564332835479 | -2.192145455604 |
| O  | 3.546054499374  | 2.976052731096  | -0.740307999722 |
| O  | 1.986932961832  | -1.527072378003 | 1.577350733956  |
| Si | 4.279551305414  | 1.641133401106  | -0.094807442231 |
| Si | -4.518670679871 | -2.091162436660 | 2.129208708854  |
| Si | -2.210459784444 | -5.670688164512 | 1.877031546766  |
| Si | 0.532610848565  | -2.091164182223 | 2.129247983236  |
| Si | -0.771621050981 | 1.641134989518  | -0.094909404453 |
| Si | 2.840836723107  | -5.670655567314 | 1.877167270582  |
| TV | 10.102619897955 | 0.000000000002  | 0.000000000002  |
| TV | 0.169801569314  | 5.402833893180  | 0.000000000001  |
| TV | -2.672840444776 | -0.265704881627 | 4.402591813850  |

# EQ-SiO<sub>2</sub> 12

|   |                 |                 |                 |
|---|-----------------|-----------------|-----------------|
| O | -2.010325750928 | 1.527924071514  | 0.035383615788  |
| O | 3.353681452490  | -2.009486283699 | -2.871568452315 |
| O | -0.247175633265 | 1.534479510425  | 2.199096557053  |
| O | -0.221790917917 | -0.244869773279 | -0.702199698820 |
| O | -2.041139363805 | 5.069446352128  | 0.035332641438  |



|    |                 |                 |                 |
|----|-----------------|-----------------|-----------------|
| O  | 3.322825387312  | 1.532082820271  | -2.871558641331 |
| O  | -0.278039856280 | 5.076028325194  | 2.199119457405  |
| O  | -0.252639577516 | 3.296678894422  | -0.702210662560 |
| O  | -2.072144659676 | 8.610997976836  | 0.035367009417  |
| O  | 3.291916907645  | 5.073608261288  | -2.871601283670 |
| O  | -0.308908769861 | 8.617612844994  | 2.199086518423  |
| O  | -0.283473979714 | 6.838141822779  | -0.702198341695 |
| Si | -2.094033464308 | 8.611101571679  | 1.834521794705  |
| Si | -2.031818042483 | 3.296831002331  | -0.336798569402 |
| Si | -2.062645317647 | 6.838374029506  | -0.336771826167 |
| Si | -2.032297056313 | 1.528032648415  | 1.834540225456  |
| Si | -2.063153218064 | 5.069548363070  | 1.834507676132  |
| Si | -2.000964346399 | -0.244716643524 | -0.336749645453 |
| TV | 3.565142274898  | 0.000000000010  | 0.000000000009  |
| TV | -0.092582502617 | 10.624633539681 | 0.000000000162  |
| TV | -1.776914938296 | -1.775057662594 | 4.335037354484  |

# EQ-SiO<sub>2</sub> 13

|    |                 |                 |                 |
|----|-----------------|-----------------|-----------------|
| O  | -1.211909300525 | -4.452089312571 | 3.043707423995  |
| O  | 0.403643775834  | -2.815254802370 | 1.585877145581  |
| O  | -2.185004279151 | 0.895590813112  | 0.361272128181  |
| O  | 1.723043717386  | 0.014632808366  | -1.816207210364 |
| O  | -3.604972621084 | 2.646607184340  | -1.178949852425 |
| O  | -2.210933429761 | -2.175728213562 | 1.921186707596  |
| O  | 3.985285397729  | -4.452039266332 | 3.043634148078  |
| O  | 5.600903028122  | -2.815243961390 | 1.585862715840  |
| O  | 3.012221056726  | 0.895619986804  | 0.361197733718  |
| O  | 6.920327904714  | 0.014619987096  | -1.816172407722 |
| O  | 1.592297586140  | 2.646742904351  | -1.179008097285 |
| O  | 2.986366940634  | -2.175652126518 | 1.921151784558  |
| Si | 2.569699665417  | 1.298381684762  | -1.180286000634 |
| Si | -3.675440663105 | -2.309973066647 | 2.703525347768  |
| Si | -1.124909552202 | -3.430711335294 | 1.730267001064  |
| Si | 1.521811182452  | -2.309898620041 | 2.703437495062  |
| Si | -2.627496154741 | 1.298323206988  | -1.180230485111 |
| Si | 4.072338114466  | -3.430670890062 | 1.730198825780  |
| TV | 10.394503583238 | 0.000000000002  | 0.000000000002  |
| TV | -0.720860707342 | 5.204272008657  | 0.000000000001  |
| TV | -0.673681520555 | -0.861209841627 | 5.127171838905  |

# EQ-SiO<sub>2</sub> 14

|    |                 |                 |                 |
|----|-----------------|-----------------|-----------------|
| O  | -3.918487134906 | -2.429703273084 | 6.353895139132  |
| O  | -1.761632630511 | -2.302668853634 | -0.051218754487 |
| O  | -1.972427867678 | 0.333988690007  | 0.435241551412  |
| O  | 3.513833590250  | -2.390283814573 | -2.918961800793 |
| O  | -0.260701804505 | 1.229381714561  | -1.461100446457 |
| O  | -3.455282222080 | -1.278979680083 | 1.871980718903  |
| O  | -4.032970880604 | 2.803044651741  | 6.353749341032  |
| O  | -1.876115579609 | 2.930194721669  | -0.051422579962 |
| O  | -2.086879926051 | 5.566909005061  | 0.435060019326  |
| O  | 3.399453649174  | 2.842794687661  | -2.919254194419 |
| O  | -0.374817500556 | 6.462027323900  | -1.460883097325 |
| O  | -3.569487602981 | 3.953750794694  | 1.871991699122  |
| Si | -1.054585013429 | 6.787509618384  | 0.017835819539  |
| Si | -4.715925983444 | -2.272999983285 | 2.253180976431  |
| Si | -1.870221199597 | -6.392046910505 | 1.136162688700  |
| Si | -4.830350597839 | 2.959920239277  | 2.252934562658  |

|    |                 |                 |                 |
|----|-----------------|-----------------|-----------------|
| Si | -0.940495702212 | 1.554747703987  | 0.017651380710  |
| Si | -1.984365085373 | -1.159296168661 | 1.136401526793  |
| TV | 5.277393847098  | 0.000000000006  | -0.000000000008 |
| TV | -0.228555400940 | 10.465662966334 | 0.000000000000  |
| TV | -4.317195945664 | 1.069839652080  | 5.217287883229  |

# EQ-SiO<sub>2</sub> 15

|    |                 |                 |                 |
|----|-----------------|-----------------|-----------------|
| O  | -4.005605988644 | -2.929079510213 | 6.402521687681  |
| O  | -2.071091840620 | -2.672365195974 | 0.046246699778  |
| O  | -2.296325632789 | -0.076665691077 | 0.737011432749  |
| O  | 2.885493835552  | -2.937606111029 | -2.737207277901 |
| O  | -0.649073785281 | 0.583213354034  | -1.329074076364 |
| O  | -3.808426078276 | -1.786660186456 | 2.020526560744  |
| O  | -3.959107554643 | 2.208888691297  | 6.443539723417  |
| O  | -2.007369908899 | 2.474237289712  | 0.075111402865  |
| O  | -2.243659328843 | 5.069351830064  | 0.743686538926  |
| O  | 2.937233918749  | 2.211063052090  | -2.713177227980 |
| O  | -0.624379593189 | 5.704506636282  | -1.355535551919 |
| O  | -3.759813130375 | 3.365137401386  | 2.024952260963  |
| Si | -1.153601361967 | 6.164925752795  | 0.151664096677  |
| Si | -5.050166920745 | -2.814972422424 | 2.374853494734  |
| Si | -2.373061991089 | -6.759185367836 | 1.334837249722  |
| Si | -4.995580446141 | 2.337308573045  | 2.400103233229  |
| Si | -1.194479247663 | 1.024128592792  | 0.177200475754  |
| Si | -2.328822214682 | -1.623241555729 | 1.314478289330  |
| TV | 5.262772346381  | -0.000000003432 | 0.000000000774  |
| TV | 0.099710943037  | 10.287039101583 | -0.000000000396 |
| TV | -4.051903323656 | 1.051160989203  | 5.210977655725  |

# EQ-SiO<sub>2</sub> 16

|    |                 |                 |                 |
|----|-----------------|-----------------|-----------------|
| O  | 1.106219465656  | -5.645959490561 | 3.959070320624  |
| O  | -0.056448132862 | -2.404517375558 | -0.112595898025 |
| O  | -2.677510892512 | 1.072730905836  | 1.672967792951  |
| O  | -0.504020917890 | -0.005532068970 | -2.804224279497 |
| O  | -4.720888224451 | 0.304940465853  | 0.040534480480  |
| O  | -3.440172848556 | -1.503498451090 | 1.617641699781  |
| O  | 0.820553357173  | -6.713648807668 | 8.914272113568  |
| O  | -0.344977593856 | -3.526432678729 | 4.843742350833  |
| O  | -2.891303292837 | -0.091218707975 | 6.570155985602  |
| O  | -0.813950355588 | -0.949780498689 | 2.066954292211  |
| O  | -5.030741270090 | -0.810871537505 | 5.059421514638  |
| O  | -3.746524917358 | -2.634375841848 | 6.604263272812  |
| Si | -3.639114654173 | 0.118705907924  | 5.092175885500  |
| Si | -4.894359113358 | -1.125355094832 | 0.887435324660  |
| Si | 1.286427346600  | -5.690051019420 | 2.318186258987  |
| Si | -5.194582572892 | -2.264922943951 | 5.868622071994  |
| Si | -3.343727515868 | 1.246184457735  | 0.148892001335  |
| Si | 1.003877272980  | -6.832688058208 | 7.275724276035  |
| TV | 5.233427633074  | 0.000000000001  | 0.000000000001  |
| TV | -3.652043277728 | 5.252686466900  | 0.000000000002  |
| TV | -0.619864098883 | -2.166604302233 | 9.849118306557  |

# EQ-SiO<sub>2</sub> 17

|   |                 |                 |                 |
|---|-----------------|-----------------|-----------------|
| O | -3.904600954998 | -3.233698434467 | 1.584463677238  |
| O | 0.912994345936  | -1.137716872522 | 1.564841532160  |
| O | -3.067440499509 | 0.967943888985  | -0.067998655493 |
| O | 1.313837609948  | -0.893936215028 | -1.064531585731 |

|    |                 |                 |                 |
|----|-----------------|-----------------|-----------------|
| O  | -2.881760199414 | -0.762284404164 | 2.025431217807  |
| O  | -1.232040289239 | -1.083812407035 | -0.109739975917 |
| O  | -3.097273604868 | -4.142754488287 | 6.548507247182  |
| O  | 1.720108699062  | -2.047149480065 | 6.528682109107  |
| O  | -2.260556400307 | 0.058628664145  | 4.895622645493  |
| O  | 2.120980870666  | -1.802846926432 | 3.899526061480  |
| O  | -2.074303637550 | -1.671244180193 | 6.989916978421  |
| O  | -0.425051358302 | -1.993280118836 | 4.854706835696  |
| Si | -1.227604740538 | -0.884094782314 | 5.805078492467  |
| Si | -4.191537570701 | -1.736012297107 | 2.260226771505  |
| Si | 0.339042083179  | -1.604501225271 | 0.067279299589  |
| Si | -3.384226845933 | -2.645029050883 | 7.223973450829  |
| Si | -2.034581553220 | 0.024951066549  | 0.841000116820  |
| Si | 1.146073378652  | -2.513754047665 | 5.031182846990  |
| TV | 6.497066328121  | 0.000000000001  | 0.000000000001  |
| TV | -3.495539163029 | 4.234016930599  | -0.000000000000 |
| TV | 1.614228509748  | -1.818285940472 | 9.927724549687  |

# EQ-SiO<sub>2</sub> 18

|    |                 |                 |                 |
|----|-----------------|-----------------|-----------------|
| O  | -2.479361961871 | -2.380886884637 | 2.300488179854  |
| O  | 0.136776191905  | -2.554948080005 | 1.634652848787  |
| O  | -1.327603772661 | 0.941375383307  | 0.490996125453  |
| O  | 2.087433723947  | 0.330093594816  | -1.477616354116 |
| O  | -3.697446052580 | -0.238986920731 | 1.135265857747  |
| O  | -1.725451450736 | -1.610208868058 | -0.167546770561 |
| O  | 2.711915154189  | -2.381250049514 | 2.300223021150  |
| O  | 5.328220177049  | -2.554909076746 | 1.634370290064  |
| O  | 3.864199800765  | 0.941176582134  | 0.490645941263  |
| O  | 7.278508776431  | 0.330198623120  | -1.477690702286 |
| O  | 1.494125123285  | -0.238931883686 | 1.135388221465  |
| O  | 3.465782232595  | -1.610393360911 | -0.167624434215 |
| Si | 2.708559164952  | -0.134405247267 | -0.004638661522 |
| Si | -3.898718404728 | -1.514620684848 | 2.192532136966  |
| Si | -1.404002450056 | -2.681946821069 | 1.066661103843  |
| Si | 1.292712082800  | -1.514695257033 | 2.192535032551  |
| Si | -2.482988515147 | -0.134314120754 | -0.004672018346 |
| Si | 3.787416430451  | -2.682138038962 | 1.066494585554  |
| TV | 10.382681624219 | 0.000000000002  | 0.000000000002  |
| TV | 0.187418554876  | 5.165985981214  | 0.000000000000  |
| TV | -1.205828941335 | -1.293043616160 | 5.186254538007  |

# EQ-SiO<sub>2</sub> 19

|    |                 |                 |                 |
|----|-----------------|-----------------|-----------------|
| O  | -2.437019267449 | -2.486007660440 | 2.259227615298  |
| O  | 0.193800469128  | -2.581786727713 | 1.639468347961  |
| O  | -1.466708483508 | 1.128443943181  | 0.306485060600  |
| O  | 1.870029535660  | 0.166631251969  | -1.421585425544 |
| O  | -3.635404264308 | -0.245982915705 | 1.248136480172  |
| O  | -1.608519133463 | -1.482574315148 | -0.123016827589 |
| O  | 2.766481738200  | -2.487444038170 | 2.258708985659  |
| O  | 5.397208799044  | -2.581454969247 | 1.639036989856  |
| O  | 3.738243037114  | 1.125418663235  | 0.306200330273  |
| O  | 7.073101457164  | 0.166700232887  | -1.421564453748 |
| O  | 1.568663326963  | -0.246763327073 | 1.248236870702  |
| O  | 3.593630104802  | -1.485973601681 | -0.124594813176 |
| Si | 2.676501984890  | -0.103260499508 | 0.009644956944  |
| Si | -3.834483189877 | -1.581998071247 | 2.227551534617  |
| Si | -1.333603673075 | -2.653773072563 | 1.025729199991  |

|    |                 |                 |                |
|----|-----------------|-----------------|----------------|
| Si | 1.369340877519  | -1.582755408516 | 2.227651407606 |
| Si | -2.527326315589 | -0.101111103991 | 0.010053849606 |
| Si | 3.869857846281  | -2.656099491134 | 1.025094294492 |
| TV | 10.406728922724 | 0.000000000002  | 0.000000000002 |
| TV | -0.041833564382 | 5.264239516896  | 0.000000000000 |
| TV | -0.880692295446 | -1.263228286162 | 5.191460915516 |

# EQ-SiO<sub>2</sub> 20

|    |                 |                 |                 |
|----|-----------------|-----------------|-----------------|
| O  | -2.978251373863 | 0.410991161595  | -0.407659695395 |
| O  | 1.697285527611  | -0.591689684456 | -0.278674076367 |
| O  | -0.389735692186 | 0.183090309101  | -0.652257300917 |
| O  | 1.071688826725  | 2.183585077053  | 0.243987789246  |
| O  | -5.621006158678 | 4.811718410797  | -0.408043812112 |
| O  | -0.944385878322 | 3.810926066985  | -0.278893136891 |
| O  | -3.031849691958 | 4.584432589136  | -0.651994017125 |
| O  | -1.570506612037 | 6.585521069048  | 0.244062565065  |
| O  | -8.263494764556 | 9.214084024862  | -0.407599118909 |
| O  | -3.587411102065 | 8.211819788672  | -0.278493732095 |
| O  | -5.674760143322 | 8.986487975798  | -0.651839630407 |
| O  | -4.212122621363 | 10.987123745938 | 0.244025018295  |
| Si | -9.086940913030 | 8.165495712817  | 0.574577844991  |
| Si | -1.837800768892 | 5.005404431039  | 0.688257714885  |
| Si | -4.479600550909 | 9.407143387786  | 0.688446093270  |
| Si | -3.802008600561 | -0.637377897403 | 0.574687023996  |
| Si | -6.444444394998 | 3.764115729285  | 0.574907398199  |
| Si | 0.804845268143  | 0.603575952915  | 0.688092290111  |
| TV | 7.142216931700  | 0.000000000012  | 0.000000000010  |
| TV | -7.926990270089 | 13.204500407605 | 0.000000000165  |
| TV | -1.787716207841 | -4.296775439556 | 2.348192453160  |

# EQ-SiO<sub>2</sub> 21

|    |                 |                 |                 |
|----|-----------------|-----------------|-----------------|
| O  | -4.810283533627 | -2.832168727421 | 2.702254517626  |
| O  | 0.367327574772  | -2.438893599177 | 0.453226125282  |
| O  | -0.217656947639 | 0.152240162981  | 1.063993900481  |
| O  | 1.898817119905  | -2.178541288230 | -1.875350569436 |
| O  | 0.769190520685  | 2.454146962485  | -0.246518906284 |
| O  | -3.823324756914 | -0.536886880438 | 1.389480817647  |
| O  | -2.044653731099 | 0.900989357191  | 2.702249317373  |
| O  | 3.132921605810  | 1.294251283568  | 0.453231568543  |
| O  | 2.547938306570  | 3.885422985170  | 1.064049368505  |
| O  | 4.664408707706  | 1.554617607965  | -1.875327377226 |
| O  | 3.534730218022  | 6.187291893866  | -0.246525172028 |
| O  | -1.057732974936 | 3.196258199393  | 1.389447622999  |
| Si | 4.083787149686  | 4.655123460135  | 0.540218952726  |
| Si | -5.359246914594 | -1.302380924503 | 1.915510810541  |
| Si | -4.787231101742 | -3.924275423647 | 1.227386105671  |
| Si | -2.593651006934 | 2.430776789760  | 1.915525005542  |
| Si | 1.318204844433  | 0.921957597994  | 0.540228283302  |
| Si | -2.021641424287 | -0.191124173379 | 1.227384032446  |
| TV | 5.786075029130  | -0.000000000000 | 0.000000000002  |
| TV | 5.531183317243  | 7.466316514561  | 0.000000000004  |
| TV | -3.287439937691 | 0.501340414013  | 3.877122207520  |

# EQ-SiO<sub>2</sub> 22

|   |                 |                 |                 |
|---|-----------------|-----------------|-----------------|
| O | -3.091793167918 | 3.513272226806  | 0.328312602050  |
| O | 6.424976974035  | -3.937871491591 | -2.229106419730 |
| O | -2.123738091372 | 1.162274263399  | 1.332441961290  |

|    |                 |                 |                 |
|----|-----------------|-----------------|-----------------|
| O  | -0.927035539145 | -0.119882254185 | -0.766931387258 |
| O  | -4.479326025392 | 2.038205605482  | 2.313928410785  |
| O  | 5.051319209015  | -5.382313406900 | -0.260537580006 |
| O  | -3.488414443703 | -0.284366069094 | 3.304976649515  |
| O  | -2.315133985705 | -1.582133126476 | 1.215383222962  |
| O  | -5.850471453108 | 0.577079304710  | 4.316792077031  |
| O  | 3.657642809167  | -6.879822776922 | 1.766707224295  |
| O  | -4.903087412991 | -1.782534395614 | 5.328313288655  |
| O  | -3.712118656020 | -3.027557121358 | 3.204190143854  |
| Si | -6.274287359153 | -0.933273527425 | 4.928008512974  |
| Si | -2.750887153719 | -1.697880894307 | 2.835757072549  |
| Si | -4.139359959989 | -3.168595603898 | 4.825123811718  |
| Si | -3.505454327182 | 2.000043416233  | 0.940597188347  |
| Si | -4.886992803099 | 0.531297061109  | 2.937056282068  |
| Si | -1.366769197289 | -0.238953653241 | 0.852167235175  |
| TV | 5.652894194691  | 0.000000000011  | 0.000000000009  |
| TV | -3.643142671245 | 6.504476499823  | 0.000000000077  |
| TV | -4.150764260754 | -4.394674209943 | 5.973271623471  |

# EQ-SiO<sub>2</sub> 23

|    |                 |                 |                 |
|----|-----------------|-----------------|-----------------|
| O  | -2.881364847571 | -0.033925647155 | -0.548587880464 |
| O  | 1.757599659971  | -0.506052700490 | -0.361713138674 |
| O  | -0.300030145276 | 0.335562426579  | -0.763026645597 |
| O  | 0.824665012592  | 2.235094293654  | 0.605963236965  |
| O  | -5.421973928298 | 4.548437047517  | -0.557273089688 |
| O  | -0.784193905629 | 4.099477688392  | -0.358991122957 |
| O  | -2.840449838310 | 4.942638338756  | -0.762902262876 |
| O  | -1.716187909669 | 6.843153155239  | 0.606899673004  |
| O  | -7.962258725861 | 9.155783815966  | -0.558199361528 |
| O  | -3.323738827443 | 8.709195532568  | -0.359646771789 |
| O  | -5.380942518220 | 9.550429207442  | -0.761315943917 |
| O  | -4.239552255818 | 11.455198815559 | 0.586359491804  |
| Si | -8.953344535489 | 8.495501677043  | 0.571426578817  |
| Si | -1.717645626425 | 5.191087975686  | 0.676047449809  |
| Si | -4.254623343264 | 9.803986787302  | 0.674081003795  |
| Si | -3.871733817361 | -0.717009907609 | 0.568942884991  |
| Si | -6.414106627467 | 3.887311188229  | 0.571713957247  |
| Si | 0.822673667470  | 0.583172140766  | 0.675811158876  |
| TV | 7.216081098595  | 0.000000000011  | 0.000000000010  |
| TV | -7.618423154717 | 13.824799399171 | 0.000000000162  |
| TV | -1.974736563160 | -4.584572005392 | 2.375914685289  |

# EQ-SiO<sub>2</sub> 24

|    |                 |                 |                 |
|----|-----------------|-----------------|-----------------|
| O  | -0.644248739486 | 1.601311535972  | 1.503526961588  |
| O  | 5.828089531657  | -0.049706591978 | -3.223235810571 |
| O  | -3.533554725296 | -0.398866371698 | 0.808607568363  |
| O  | -0.825488947462 | 0.125568808527  | -0.754485003317 |
| O  | -1.164541931227 | 4.384270757707  | 1.503684213311  |
| O  | 5.307417633169  | 2.733126659531  | -3.223205812576 |
| O  | -4.054134234314 | 2.384281468270  | 0.807843501986  |
| O  | -1.345620711258 | 2.908716484292  | -0.754632648533 |
| O  | -1.685572893786 | 7.166874571028  | 1.504192280458  |
| O  | 4.787357389824  | 5.516248413662  | -3.223667441805 |
| O  | -4.573960217370 | 5.167254025423  | 0.808774668267  |
| O  | -1.866016375653 | 5.691485330180  | -0.754548065273 |
| Si | -5.656306994501 | 6.405356451227  | 1.151371247438  |
| Si | -0.527977021682 | 3.063663036624  | 0.682637443264  |

|    |                 |                 |                |
|----|-----------------|-----------------|----------------|
| Si | -1.048447753613 | 5.846592824806  | 0.682851423672 |
| Si | -4.615656094917 | 0.839440011797  | 1.151164208302 |
| Si | -5.136082605015 | 3.622491208021  | 1.151215087697 |
| Si | -0.007940809336 | 0.280166859286  | 0.683017847810 |
| TV | 7.583061110383  | 0.000000000012  | 0.000000000009 |
| TV | -1.561094555650 | 8.349057510197  | 0.000000000116 |
| TV | -3.730784215900 | -2.157088652691 | 3.502242075455 |

# EQ-SiO<sub>2</sub> 25

|    |                 |                 |                 |
|----|-----------------|-----------------|-----------------|
| O  | -3.656221867873 | -3.539519369011 | 2.072743754466  |
| O  | -0.040761273746 | -0.822076141358 | 1.416742863856  |
| O  | -0.048720879083 | 1.634859908489  | 0.179005049421  |
| O  | -0.025259945914 | -1.891607524387 | -1.402215793183 |
| O  | -1.855497013394 | -1.887346239921 | 2.995164029391  |
| O  | -1.831756250390 | -0.232325040292 | -0.483131913248 |
| O  | 0.021589631860  | -3.539533253816 | 2.072665311657  |
| O  | 3.637131907710  | -0.821991379643 | 1.416838995585  |
| O  | 3.629268085676  | 1.634632583499  | 0.178763869403  |
| O  | 3.652595198320  | -1.891394819976 | -1.402236703856 |
| O  | 1.822252232551  | -1.887343249870 | 2.995167634532  |
| O  | 1.845782153882  | -0.232450705940 | -0.482939466198 |
| Si | 2.700372013284  | 0.404778706620  | 0.799427327183  |
| Si | -3.726512552417 | -1.967491725538 | 2.613422706034  |
| Si | -1.892378911101 | -1.806400639955 | -1.020890280719 |
| Si | -0.048799757932 | -1.967520189938 | 2.613415181258  |
| Si | -0.977461471660 | 0.404799135316  | 0.799469800918  |
| Si | 1.785391195748  | -1.806479007871 | -1.020947962885 |
| TV | 7.355610563510  | 0.000000000002  | 0.000000000008  |
| TV | 1.812567857548  | 4.582590812339  | 0.000000000001  |
| TV | 0.009171054271  | 0.325355687867  | 5.714000783698  |

# EQ-SiO<sub>2</sub> 26

|    |                 |                 |                 |
|----|-----------------|-----------------|-----------------|
| O  | -1.574924625348 | 1.122263425775  | 0.716177851530  |
| O  | -0.678015023954 | 1.394908749294  | 3.176037197779  |
| O  | 2.231829821172  | 2.101315300511  | 2.600774368076  |
| O  | 1.039146645879  | 0.405205120405  | 0.273347222785  |
| O  | -2.383485740360 | 3.846916204968  | 0.721759118780  |
| O  | -1.483742116810 | 4.087913096061  | 3.181584827985  |
| O  | 1.429888783853  | 4.817870081439  | 2.606598149186  |
| O  | 0.230773645812  | 3.118988637972  | 0.283700930675  |
| O  | -3.183621767433 | 6.536609401603  | 0.712624700501  |
| O  | -2.287085844525 | 6.813383802301  | 3.170822098141  |
| O  | 0.625884884789  | 7.532573003484  | 2.602574925002  |
| O  | -0.567021873151 | 5.836594190820  | 0.270592203715  |
| Si | -1.780369602473 | 6.949905885223  | -0.072642969324 |
| Si | -2.844240066845 | 3.703079292508  | 2.310178485433  |
| Si | -3.647649919389 | 6.417270865133  | 2.302817258777  |
| Si | -0.169720057614 | 1.524463921364  | -0.068090956530 |
| Si | -0.975631328667 | 4.238960377404  | -0.063592002794 |
| Si | -2.035841097929 | 0.992332056257  | 2.306292189422  |
| TV | 5.495443565659  | -0.000000000000 | -0.000000000000 |
| TV | -2.412837306863 | 8.139085297403  | 0.000000000000  |
| TV | -0.145706234444 | -0.033594789044 | 4.860711713442  |

# EQ-SiO<sub>2</sub> 27

|   |                |                 |                |
|---|----------------|-----------------|----------------|
| O | 0.524126579869 | 2.129516767552  | 2.475540844027 |
| O | 1.120981384392 | -0.233921719511 | 1.563779808387 |

|    |                 |                 |                 |
|----|-----------------|-----------------|-----------------|
| O  | -1.401881748043 | 0.697751029268  | 1.221861626870  |
| O  | 0.351118250489  | 2.655733370788  | 0.293679107260  |
| O  | -2.149489651422 | 6.429900674509  | 2.475997744485  |
| O  | -0.248761167180 | 5.021944109945  | 1.229536208279  |
| O  | -2.788764746989 | 4.068291013182  | 1.529011295820  |
| O  | -2.036542152958 | 6.950188198109  | 0.286026328039  |
| O  | -4.646874491811 | 10.747489139691 | 2.486480581925  |
| O  | -3.924969341305 | 8.390719903651  | 1.559942049430  |
| O  | -6.465085935563 | 9.305630291587  | 1.198457818565  |
| O  | -4.647190875217 | 11.252651856020 | 0.285144234089  |
| Si | -2.312845072429 | 8.037637431007  | 1.744860247221  |
| Si | -1.863153570883 | 5.346025652106  | 1.018308339920  |
| Si | -4.851382009765 | 9.649407392299  | 1.015653488405  |
| Si | 2.737797948562  | -0.564420910748 | 1.755776838677  |
| Si | 0.667674068289  | 3.738176909176  | 1.743519378922  |
| Si | 0.210444492942  | 1.043889285538  | 1.025984095229  |
| TV | 5.068291033017  | -0.000000000002 | -0.000000000004 |
| TV | -7.600446255335 | 12.914335736055 | 0.000000000004  |
| TV | -2.527226625172 | -2.836737870500 | 3.260600570970  |

# EQ-SiO<sub>2</sub> 28

|    |                 |                 |                 |
|----|-----------------|-----------------|-----------------|
| O  | -1.632078516332 | -4.010604005684 | 2.674286122472  |
| O  | 0.320537763242  | -2.108208026660 | 2.328452739287  |
| O  | -2.325048344026 | 1.822742730481  | 0.436802768786  |
| O  | 2.274437800776  | -0.196951598064 | -1.633215268963 |
| O  | -3.938421881556 | -0.263370466395 | 0.419945433687  |
| O  | -1.945368300177 | -2.105988589599 | 0.811529106679  |
| O  | -1.640520803334 | -4.013378948227 | 6.975169418509  |
| O  | 0.311958310614  | -2.110437579248 | 6.629732715042  |
| O  | -2.333391606721 | 1.820174622955  | 4.738121943984  |
| O  | 2.266076014859  | -0.198956929151 | 2.667784726078  |
| O  | -3.946962739747 | -0.265709985824 | 4.720999967434  |
| O  | -1.953468770985 | -2.108244238325 | 5.112881311200  |
| Si | -3.140308103310 | 0.786886723386  | 3.701822922473  |
| Si | -3.089021614744 | -1.159914553165 | 1.557777084684  |
| Si | -0.807234115091 | -3.059794996714 | 1.559936832926  |
| Si | -3.097537824540 | -1.162288944581 | 5.858881240936  |
| Si | -3.131810745492 | 0.789121694846  | -0.599347039803 |
| Si | -0.815603761210 | -3.062231937772 | 5.861184923866  |
| TV | 4.537700732329  | 0.000000000001  | 0.000000000001  |
| TV | -2.364139053569 | 5.802759269000  | 0.000000000001  |
| TV | -0.016929712799 | -0.004641217590 | 8.602320920920  |

# EQ-SiO<sub>2</sub> 29

|    |                 |                 |                 |
|----|-----------------|-----------------|-----------------|
| O  | -2.602839259217 | 2.284241046901  | 0.374998083732  |
| O  | 4.117511223841  | -0.594203473077 | -1.598900329223 |
| O  | -1.995443036958 | -0.358010945190 | 0.762058773346  |
| O  | 0.817991118474  | 0.419311269350  | -0.533103417732 |
| O  | -3.673856123185 | -1.383436086318 | 3.638179454057  |
| O  | 3.047975667607  | -4.268024514548 | 1.670677685399  |
| O  | -3.068059854991 | -4.024991880224 | 4.026919526285  |
| O  | -0.258630165663 | -3.240656667684 | 2.735791533598  |
| O  | -4.741958346895 | -5.034499465484 | 6.918883823734  |
| O  | 1.978299857864  | -7.935976487046 | 4.941137710241  |
| O  | -4.141264652324 | -7.677966334523 | 7.294994044363  |
| O  | -1.328632246755 | -6.895626858514 | 6.001346860226  |
| Si | -5.288877981443 | -6.492567983237 | 7.474048584818  |

|    |                 |                  |                |
|----|-----------------|------------------|----------------|
| Si | -1.526629529790 | -4.232821320762  | 3.468922495280 |
| Si | -2.599222566256 | -7.886208128913  | 6.737652692069 |
| Si | -3.144483133637 | 0.826462243002   | 0.936660231343 |
| Si | -4.215309448727 | -2.839221089298  | 4.204118580758 |
| Si | -0.455215753058 | -0.565655394880  | 0.201355524332 |
| TV | 5.008218393081  | 0.000000000012   | 0.000000000011 |
| TV | -2.647688625119 | 4.423227829169   | 0.000000000055 |
| TV | -3.219661310639 | -10.983079944315 | 9.805115746379 |

# EQ-SiO<sub>2</sub> 30

|    |                 |                 |                 |
|----|-----------------|-----------------|-----------------|
| O  | -2.762607527481 | 0.295913205773  | -2.697573745928 |
| O  | -4.097403057786 | -1.467514777543 | -1.098091664718 |
| O  | -4.833568122417 | -0.138186423686 | 1.407528168247  |
| O  | -0.119049401485 | 0.794546861173  | 1.261285369685  |
| O  | 0.061891194907  | -0.612819726946 | -1.062223357459 |
| O  | -2.326977959881 | 0.351033781807  | -0.099166499566 |
| O  | -3.345198093904 | 3.076301961362  | -2.697598375078 |
| O  | -4.679963982573 | 1.312865623767  | -1.097998588819 |
| O  | -5.416155814532 | 2.642290422255  | 1.407475674013  |
| O  | -0.701701578706 | 3.574812686610  | 1.261118161619  |
| O  | -0.520802383521 | 2.167542411404  | -1.062083598549 |
| O  | -2.909726169907 | 3.131523483326  | -0.099191283032 |
| Si | -6.468779882802 | 3.871681180623  | 1.863305451041  |
| Si | -3.516126422127 | 0.104301810981  | -1.235453064201 |
| Si | -0.706304776331 | 0.676268687344  | -0.296074873136 |
| Si | -4.098832297397 | 2.884699941279  | -1.235513570311 |
| Si | -5.885996313246 | 1.091403511768  | 1.863279463662  |
| Si | -1.289000470365 | 3.456673101225  | -0.296161592106 |
| TV | 7.285758952323  | 0.000000000002  | 0.000000000002  |
| TV | -1.165371756839 | 5.560749970887  | 0.000000000003  |
| TV | -2.593488841960 | -1.975913305377 | 6.210219913395  |

# EQ-SiO<sub>2</sub> 31

|    |                 |                 |                 |
|----|-----------------|-----------------|-----------------|
| O  | -2.330625669235 | -2.400300684504 | 1.993460860522  |
| O  | 0.454161578422  | -7.214530393725 | 3.125256063664  |
| O  | -3.746830803697 | 2.720204296416  | -0.004833987027 |
| O  | 2.000294189152  | 0.665416834244  | -1.697634533594 |
| O  | -2.304407872677 | 0.512792040488  | 0.613392523204  |
| O  | -0.931442610617 | -1.903421787032 | -0.298912968907 |
| O  | 0.513463079128  | -2.401017255780 | 1.993398856770  |
| O  | 3.298855261038  | -7.214785549528 | 3.125358857755  |
| O  | -0.902216638573 | 2.719442980664  | -0.004075465631 |
| O  | 4.845014462574  | 0.665208504006  | -1.697721474189 |
| O  | 0.540656857444  | 0.512135616217  | 0.612971722965  |
| O  | 1.913496072170  | -1.903307283683 | -0.298676196882 |
| Si | 1.961967954266  | 1.078812003516  | -0.095081239066 |
| Si | -2.341534067504 | -1.252099749337 | 3.191142382921  |
| Si | -2.354530711411 | -2.533280709715 | 0.343238891505  |
| Si | 0.503309401984  | -1.252467009498 | 3.190967045710  |
| Si | -0.882885316761 | 1.078299341008  | -0.095008909661 |
| Si | 0.490419501474  | -2.533844212642 | 0.343221973721  |
| TV | 5.689957850244  | -0.000000000000 | 0.000000000014  |
| TV | -1.372494314472 | 6.861247523829  | 0.000000000001  |
| TV | -1.488695180567 | -2.821433298980 | 6.284120082578  |

# EQ-SiO<sub>2</sub> 32

|   |                 |                |                |
|---|-----------------|----------------|----------------|
| O | -3.800128880481 | 3.417777111101 | 1.173983635938 |
|---|-----------------|----------------|----------------|



|    |                 |                 |                 |
|----|-----------------|-----------------|-----------------|
| O  | 4.598566842162  | -3.231020156137 | -0.398973930910 |
| O  | -2.426139512403 | 2.131383560157  | -0.398991591717 |
| O  | -0.879646439731 | -0.834723365270 | -0.913969717276 |
| O  | -5.174706823274 | 2.311785692927  | 3.257549089181  |
| O  | 3.223849467376  | -4.341724701053 | 1.687031785144  |
| O  | -3.800852182452 | 1.020738721880  | 1.687051562653  |
| O  | -2.256363965511 | -1.944664463704 | 1.173960940806  |
| O  | -6.551063645391 | 1.206183362004  | 5.344446507315  |
| O  | 1.846467127290  | -5.446575050047 | 3.775797987305  |
| O  | -5.178209955579 | -0.084139997814 | 3.775812945220  |
| O  | -3.630951467387 | -3.050642594277 | 3.257532126719  |
| Si | -5.183098461949 | 0.008361026624  | 5.602798930854  |
| Si | -0.886838648377 | -3.142674335758 | 1.429235961619  |
| Si | -2.263044941393 | -4.248541779115 | 3.515570898415  |
| Si | -2.430613788448 | 2.219750607421  | 1.429229415716  |
| Si | -3.806807187927 | 1.113938361090  | 3.515603403111  |
| Si | 0.488323670856  | -2.032573183390 | -0.655630517118 |
| TV | 5.480939283598  | 0.000000000011  | 0.000000000010  |
| TV | -4.284230832907 | 5.362423263397  | 0.000000000072  |
| TV | -4.127655529905 | -3.321488989530 | 6.258440447000  |

# EQ-SiO<sub>2</sub> 33

|    |                 |                 |                 |
|----|-----------------|-----------------|-----------------|
| O  | -1.725859634903 | -5.100400897740 | 3.344355991710  |
| O  | -0.306872222419 | -4.125275698002 | 0.791076758553  |
| O  | -1.733332540813 | 1.292983157344  | 0.864943512147  |
| O  | 1.096523068699  | -0.348350231616 | -1.588394542413 |
| O  | -1.737804342254 | 4.036154610503  | -1.212398529540 |
| O  | -1.725257012842 | -1.876853816458 | 1.235257881765  |
| O  | 1.112898896323  | -5.100405141837 | 3.344336633829  |
| O  | 2.531864304221  | -4.125261955212 | 0.790949766939  |
| O  | 1.105398918611  | 1.292990741359  | 0.864944614529  |
| O  | 3.935298248767  | -0.348194059608 | -1.588241310475 |
| O  | 1.100976539212  | 4.036176969537  | -1.212380491826 |
| O  | 1.113494382638  | -1.876834655580 | 1.235257825537  |
| Si | 1.106387637430  | 2.662859126680  | -0.174232106371 |
| Si | -3.145370619278 | -2.646933851491 | 1.678703211592  |
| Si | -1.731492563239 | -6.577490744694 | 2.456173777964  |
| Si | -0.306611899008 | -2.646890675441 | 1.678737464001  |
| Si | -1.732357008029 | 2.662854169425  | -0.174237543305 |
| Si | 1.107251884067  | -6.577488614778 | 2.456177859557  |
| TV | 5.677501712912  | 0.000000000002  | 0.000000000002  |
| TV | -0.007901227546 | 7.549780375341  | 0.000000000001  |
| TV | -1.416521151455 | 0.548773024351  | 4.484509448038  |

# EQ-SiO<sub>2</sub> 34

|   |                 |                 |                 |
|---|-----------------|-----------------|-----------------|
| O | -1.522304823515 | -1.123472221060 | 2.558903382556  |
| O | 0.269335675447  | -2.441290367859 | 1.803300529045  |
| O | -1.546845077283 | 0.732319347233  | -0.864116816403 |
| O | 0.323520988827  | -1.147901374397 | -1.838829864649 |
| O | -3.265576543181 | 0.065439862291  | 1.027795703509  |
| O | -1.563792062536 | -1.823071772716 | 0.056758366328  |
| O | 2.059327594061  | -1.123516420558 | 2.558913179069  |
| O | 3.851040113178  | -2.441241279662 | 1.803449029271  |
| O | 2.034877623248  | 0.732332095048  | -0.864180301733 |
| O | 3.905135067083  | -1.147913839491 | -1.838827629956 |
| O | 0.316115069241  | 0.065447397662  | 1.027807947637  |
| O | 2.017869710868  | -1.823055992999 | 0.056767218575  |

|    |                 |                 |                 |
|----|-----------------|-----------------|-----------------|
| Si | 1.109325045133  | -0.539619671168 | -0.403510778975 |
| Si | -3.309458724842 | -0.931171272407 | 2.800024286121  |
| Si | -1.519779988997 | -2.634363046175 | 1.562231318495  |
| Si | 0.272199371649  | -0.931152245628 | 2.799991051442  |
| Si | -2.472371578609 | -0.539682840796 | -0.403521208383 |
| Si | 2.061900432132  | -2.634378670601 | 1.562223701439  |
| TV | 7.163296439152  | 0.000000000000  | 0.000000000002  |
| TV | 1.802976970408  | 4.392112800466  | 0.000000000000  |
| TV | -0.004031283704 | 1.909252091100  | 5.168060994537  |

# EQ-SiO<sub>2</sub> 35

|    |                 |                 |                 |
|----|-----------------|-----------------|-----------------|
| O  | -1.630611631252 | -5.609300526776 | 2.899805144092  |
| O  | -0.207102807568 | -3.577666348183 | 1.381503139548  |
| O  | -1.641631593798 | 1.760279600322  | 0.157360865500  |
| O  | -0.197987126177 | -1.014723764752 | -1.730020777886 |
| O  | -1.634322106788 | 4.072401479958  | -0.646584264831 |
| O  | -3.060700486495 | -0.191703617335 | 1.233182403684  |
| O  | 1.212319673558  | -5.609333359593 | 2.899834216161  |
| O  | 2.635718775752  | -3.577612286065 | 1.381476562990  |
| O  | 1.201290956509  | 1.760266807463  | 0.157296156048  |
| O  | 2.644898919910  | -1.014712069098 | -1.729912050922 |
| O  | 1.208526170734  | 4.072459453164  | -0.646619970259 |
| O  | -0.217797241222 | -0.191693997059 | 1.233148612001  |
| Si | 2.622504759330  | 2.913540722351  | -0.244583644781 |
| Si | -3.045003613214 | -2.806805194361 | 2.789711628200  |
| Si | -1.628689687694 | -6.374725617913 | 1.488404742056  |
| Si | -0.202101290992 | -2.806787493406 | 2.789692828432  |
| Si | -0.220381939626 | 2.913499958207  | -0.244577938498 |
| Si | 1.214206716441  | -6.374703864923 | 1.488396888777  |
| TV | 5.685785405205  | 0.000000000001  | 0.000000000004  |
| TV | -0.010997072591 | 7.034204038569  | -0.000000000000 |
| TV | -1.425332371875 | -0.940472951737 | 4.769937924412  |

# EQ-SiO<sub>2</sub> 36

|    |                 |                 |                 |
|----|-----------------|-----------------|-----------------|
| O  | -0.860687968351 | -3.918990978488 | 1.735009118642  |
| O  | 1.611656603320  | -3.182772716944 | 0.803499750402  |
| O  | -1.936657761446 | 0.215635429077  | 0.203635655688  |
| O  | -0.963761734694 | -2.167824717427 | -0.005601686989 |
| O  | -3.987022963774 | 1.485450617730  | -0.609319250175 |
| O  | -3.838997142696 | -0.684331580585 | 1.849812450663  |
| O  | -1.047201121766 | -2.502312248284 | 4.770249716499  |
| O  | 0.636244000024  | -2.555547188549 | 3.242759615735  |
| O  | -2.639512686978 | 0.650363774294  | 3.847146997254  |
| O  | -1.122386275563 | -0.917973344390 | 2.430715361251  |
| O  | -4.317574379321 | 2.856901728280  | 3.017398860978  |
| O  | -4.929877746775 | -0.475414890845 | 4.874648875117  |
| Si | -2.672185197148 | 3.223758058414  | 2.963895156910  |
| Si | -4.033043789167 | -2.303766665923 | 2.158352682966  |
| Si | -0.856788484815 | -5.623512268799 | 2.223815577142  |
| Si | -5.340309259812 | -2.054125999304 | 5.256019046953  |
| Si | -2.439426398783 | 1.891410728466  | -0.071236680056 |
| Si | -1.858771458698 | -5.607665118271 | 5.198068778735  |
| TV | 5.943406883464  | 0.000000000001  | -0.000000000001 |
| TV | -1.561178630925 | 5.743019013426  | 0.000000000001  |
| TV | -1.578043492942 | 1.217883456152  | 6.075203161344  |

# EQ-SiO<sub>2</sub> 37

|    |                 |                 |                 |
|----|-----------------|-----------------|-----------------|
| O  | -3.784701582681 | -0.526008648100 | -2.151646087473 |
| O  | -5.198374779118 | -1.946337210070 | -0.350555097313 |
| O  | -5.502870572026 | -0.537257649908 | 1.973033473234  |
| O  | -0.076653878511 | 0.874222833291  | 0.852595091215  |
| O  | -0.531368867965 | -0.530780626054 | -1.463340412239 |
| O  | -2.489567060714 | 0.886732419724  | -0.195608770614 |
| O  | -3.775227089583 | 2.301838440600  | -2.151412330261 |
| O  | -5.188878773283 | 0.881399745956  | -0.350518721715 |
| O  | -5.493251579728 | 2.290324192386  | 1.973046657317  |
| O  | -0.067086488521 | 3.702064337431  | 0.852484576252  |
| O  | -0.521578594946 | 2.296736937202  | -1.463731616117 |
| O  | -2.480010204685 | 3.713979215354  | -0.195545737456 |
| Si | -5.881214239810 | 3.706905493555  | 1.151326583376  |
| Si | -3.791968362636 | 0.889910682765  | -1.239386258406 |
| Si | -0.868843841124 | 0.885808295113  | -0.608243774186 |
| Si | -3.782425493002 | 3.717657083399  | -1.239401014875 |
| Si | -5.890749964844 | 0.879251088937  | 1.151205419860  |
| Si | -0.859319011071 | 3.713265003183  | -0.608325019528 |
| TV | 7.454434709706  | 0.000000000000  | 0.000000000001  |
| TV | 0.019161671534  | 5.655305472300  | 0.000000000002  |
| TV | -4.718240069084 | -0.054488801863 | 10.575163515769 |

# EQ-SiO<sub>2</sub> 38

|    |                 |                 |                 |
|----|-----------------|-----------------|-----------------|
| O  | -2.086878990847 | -2.224007312412 | 3.576959655366  |
| O  | 0.637144044007  | -2.225890777144 | 0.302281485974  |
| O  | -1.751124667200 | 0.520938931678  | 1.269505595052  |
| O  | 2.006982802740  | -0.850137162610 | -3.139150402244 |
| O  | -1.697789124738 | 1.892123803655  | -0.824335655152 |
| O  | -3.763853793453 | -0.850955967282 | 2.065563995431  |
| O  | -2.089286545349 | 0.519591625585  | 3.576955612206  |
| O  | 0.634785868884  | 0.517642636902  | 0.302235754556  |
| O  | -1.753514683004 | 3.264540914221  | 1.269508608178  |
| O  | 2.004527029348  | 1.893397163522  | -3.139267203538 |
| O  | -1.700198253934 | 4.635704054339  | -0.824353965899 |
| O  | -3.766273977928 | 1.892637072575  | 2.065590852387  |
| Si | -0.868546129427 | 3.264224250728  | -0.435857898329 |
| Si | -4.945780946989 | -2.221584069690 | 1.940109714053  |
| Si | -1.917965271022 | -3.594793980685 | 2.415226368538  |
| Si | -4.948178347770 | 0.521980511925  | 1.940086276969  |
| Si | -0.866154475194 | 0.520632300018  | -0.435850041007 |
| Si | -1.920333313462 | -0.851209382935 | 2.415255651119  |
| TV | 5.915138794390  | 0.000000000001  | 0.000000000001  |
| TV | -0.004785505319 | 5.487166119772  | 0.000000000002  |
| TV | -2.059592902752 | -0.001149191226 | 5.730891657093  |

# EQ-SiO<sub>2</sub> 39

|   |                 |                 |                 |
|---|-----------------|-----------------|-----------------|
| O | -2.734703089123 | 3.279381895582  | 0.090426504344  |
| O | 4.539927976796  | -4.898507514815 | -1.946531288481 |
| O | -0.915468556700 | 1.717299804069  | 1.191046201322  |
| O | -0.904675450891 | -0.445286920705 | -0.845416846866 |
| O | -2.733691588998 | 2.558844943857  | 2.906461080724  |
| O | 4.540995253543  | -5.618904842923 | 0.869550124812  |
| O | -0.914466205547 | 0.996891631147  | 4.007200824434  |
| O | -0.903646504689 | -1.165633377979 | 1.970713909637  |
| O | -2.732648214744 | 1.838577526987  | 5.722528698170  |
| O | 4.542003013095  | -6.339258899135 | 3.685677800394  |
| O | -0.913406130569 | 0.276622613230  | 6.823392926583  |

|    |                 |                 |                |
|----|-----------------|-----------------|----------------|
| O  | -0.902660259144 | -1.885975308887 | 4.786865284336 |
| Si | -2.728193397209 | 0.664993191249  | 6.923011056892 |
| Si | -0.909695997771 | -0.717957962684 | 3.585717537097 |
| Si | -0.908728517302 | -1.438198448428 | 6.401842153613 |
| Si | -2.730198241669 | 2.105591403834  | 1.290712603992 |
| Si | -2.729216119105 | 1.385192597469  | 4.106831761110 |
| Si | -0.910561191598 | 0.002401012714  | 0.769590750285 |
| TV | 3.631870498765  | 0.000000000010  | 0.000000000009 |
| TV | -3.640599400915 | 6.007846555304  | 0.000000000083 |
| TV | 0.003106361033  | -2.160950771961 | 8.448350565094 |

# EQ-SiO<sub>2</sub> 40

|    |                 |                 |                 |
|----|-----------------|-----------------|-----------------|
| O  | -3.204272087377 | -5.873696532064 | 1.839850937079  |
| O  | 0.071931823429  | -2.771533170247 | 0.439700691292  |
| O  | -2.319001760660 | 0.851397131499  | 0.435116265740  |
| O  | 1.465257088858  | -2.806278131426 | -1.771121680427 |
| O  | -1.572482902562 | 3.570283893313  | -0.733085500870 |
| O  | -1.366882996435 | 1.807752895325  | 2.697313897292  |
| O  | -3.206347960263 | -1.228543160915 | 1.839852068906  |
| O  | 0.069840383413  | 1.873629154166  | 0.439691322807  |
| O  | -2.321079782771 | 5.496559782290  | 0.435106080863  |
| O  | 1.463171780131  | 1.838879161792  | -1.771117140111 |
| O  | -1.574565932275 | 8.215445134175  | -0.733085499473 |
| O  | -1.368968695470 | 6.452899345659  | 2.697323090581  |
| Si | -0.632657164221 | 4.936148685007  | 0.023632135376  |
| Si | -4.883322398693 | -2.031705919563 | 2.088327767335  |
| Si | -2.362213327026 | -4.354568813422 | 2.097624180773  |
| Si | -4.885413383576 | 2.613461712226  | 2.088328968509  |
| Si | -0.630571789489 | 0.290996551567  | 0.023626818796  |
| Si | -2.364309005371 | 0.290597543327  | 2.097623121524  |
| TV | 5.008402272631  | 0.000000000001  | 0.000000000001  |
| TV | -0.004164388114 | 9.290311479952  | 0.000000000002  |
| TV | -2.150039385310 | 2.323784163294  | 3.396155177027  |

# EQ-SiO<sub>2</sub> 41

|    |                 |                 |                 |
|----|-----------------|-----------------|-----------------|
| O  | -4.794268145607 | -4.748477118531 | 3.604543997700  |
| O  | -2.384243119105 | -4.189739753203 | 4.195795265691  |
| O  | -1.710303249667 | -0.063635993178 | 1.481045490374  |
| O  | 3.276224395207  | -0.041210937829 | -5.365842060482 |
| O  | 0.587265901991  | 0.936488385097  | 1.137558730895  |
| O  | -3.974602591150 | -1.723764507987 | 1.473977013306  |
| O  | -0.014482759594 | -4.748496550285 | 3.604550095741  |
| O  | 2.395536376768  | -4.189740019928 | 4.195791101891  |
| O  | 3.069463961329  | -0.063603656808 | 1.481045767163  |
| O  | 8.055999146918  | -0.041225593701 | -5.365838014027 |
| O  | 5.367042631313  | 0.936443092582  | 1.137548093627  |
| O  | 0.805192539955  | -1.723756531832 | 1.473973663631  |
| Si | 4.005638207509  | 0.343377289047  | 0.077110710018  |
| Si | -4.649763341819 | -2.491325503474 | 0.067321167829  |
| Si | -4.679575228352 | -4.892581158963 | 1.945649838813  |
| Si | 0.130031112845  | -2.491307612644 | 0.067327219336  |
| Si | -0.774143119203 | 0.343399391860  | 0.077110735858  |
| Si | 0.100200883680  | -4.892573885575 | 1.945648954632  |
| TV | 9.559573865846  | 0.000000000002  | 0.000000000002  |
| TV | 1.437351958907  | 4.539547015172  | 0.000000000001  |
| TV | -3.954852721596 | -1.147721459165 | 4.781701334191  |

# EQ-SiO<sub>2</sub> 42

|    |                 |                 |                 |
|----|-----------------|-----------------|-----------------|
| O  | -1.056887433143 | 1.337630959442  | 1.537795027442  |
| O  | 4.760550507934  | 1.158836797763  | -6.291462723782 |
| O  | -1.053026768604 | -0.476600189071 | 2.916434668842  |
| O  | -3.910415709400 | -0.663376794141 | -2.444697829465 |
| O  | 1.834709375237  | 1.337626780787  | 1.537798116484  |
| O  | 7.652143082065  | 1.158841053678  | -6.291456571334 |
| O  | 1.838566410022  | -0.476605419025 | 2.916434370000  |
| O  | -1.018825360909 | -0.663373230152 | -2.444698774185 |
| O  | 4.726297298839  | 1.337638126509  | 1.537802154029  |
| O  | 10.543740684872 | 1.158840032346  | -6.291455130927 |
| O  | 4.730145625890  | -0.476595723246 | 2.916430634114  |
| O  | 1.872766910637  | -0.663384327534 | -2.444706181809 |
| Si | 4.725529518945  | 1.335202177429  | 3.308700745621  |
| Si | 1.835651474183  | -0.474297871120 | 1.145303880843  |
| Si | 4.727234009396  | -0.474283901965 | 1.145300497888  |
| Si | -1.057655325454 | 1.335192775927  | 3.308694532364  |
| Si | 1.833937866740  | 1.335185056520  | 3.308696998108  |
| Si | -1.055943056467 | -0.474292624678 | 1.145302388963  |
| TV | 8.674771006921  | -0.000000000021 | 0.000000000009  |
| TV | -0.006272869326 | 3.622442671877  | 0.000000000050  |
| TV | -1.478689096595 | -1.627380542070 | 6.594988428201  |

# EQ-SiO<sub>2</sub> 43

|    |                 |                 |                 |
|----|-----------------|-----------------|-----------------|
| O  | -2.096396605594 | -2.970478868245 | 3.569190188724  |
| O  | 0.973713388975  | -2.330878253348 | 0.311685435465  |
| O  | -1.811081213860 | -0.064360264526 | 1.480536456317  |
| O  | 3.038290298172  | -0.473130658399 | -2.949887434920 |
| O  | -2.196649167354 | 1.283314442975  | -0.647819980205 |
| O  | -3.762074137693 | -1.888897587986 | 1.685401815196  |
| O  | -2.656224489947 | -0.241477922352 | 3.569264092159  |
| O  | 0.413829746350  | 0.397833949757  | 0.311555967696  |
| O  | -2.371021562413 | 2.664572104224  | 1.480452703195  |
| O  | 2.478364755007  | 2.255696807832  | -2.950031165950 |
| O  | -2.756581198597 | 4.012197658297  | -0.647875819815 |
| O  | -4.322200595526 | 0.839915108589  | 1.685064745921  |
| Si | -1.657290590784 | 2.815053566055  | -0.318176893237 |
| Si | -5.357163328276 | -2.218696512400 | 1.883796217754  |
| Si | -1.728973924306 | -4.315774277500 | 2.381078883197  |
| Si | -5.917282522175 | 0.509980860106  | 1.883756146297  |
| Si | -1.097222311800 | 0.086318969557  | -0.318109614399 |
| Si | -2.288823971885 | -1.586991784010 | 2.381149030810  |
| TV | 6.875603012934  | -0.000000000000 | 0.000000000001  |
| TV | -1.120035116871 | 5.457562243142  | 0.000000000004  |
| TV | -2.288869374812 | -0.481447556895 | 5.629488098777  |

# EQ-SiO<sub>2</sub> 44

|   |                 |                 |                 |
|---|-----------------|-----------------|-----------------|
| O | -3.786646319607 | -4.646579317211 | 4.095105412909  |
| O | -1.242020313909 | -2.659332309800 | 0.686718504690  |
| O | -2.182372117865 | 0.863085894144  | 0.772106307079  |
| O | 1.806434024516  | -1.241595941911 | -2.310130097115 |
| O | -0.779849143643 | 0.570556822828  | -1.397275642785 |
| O | -3.317960435392 | -1.421945451018 | 2.010152455919  |
| O | -2.086128491200 | -0.208497488356 | 4.095092938811  |
| O | 0.458438883425  | 1.778527914264  | 0.686920311548  |
| O | -0.481983119954 | 5.300944673917  | 0.771967565936  |
| O | 3.506804555482  | 3.196277527840  | -2.310158233321 |

|    |                 |                 |                 |
|----|-----------------|-----------------|-----------------|
| O  | 0.920679993728  | 5.008291990367  | -1.397391766478 |
| O  | -1.617661860574 | 3.015927209552  | 2.010131141831  |
| Si | 1.200639881983  | 4.954467156838  | 0.376574785869  |
| Si | -4.785735979021 | -2.037824481321 | 1.348738805163  |
| Si | -4.064733702630 | -4.593042818674 | 2.319035579831  |
| Si | -3.085442570470 | 2.400129082732  | 1.348880839062  |
| Si | -0.499831783754 | 0.516619227932  | 0.376547470468  |
| Si | -2.364210865997 | -0.155132569775 | 2.319059769599  |
| TV | 5.008279518406  | -0.000000000000 | 0.000000000001  |
| TV | 3.400896278472  | 8.875770774944  | 0.000000000003  |
| TV | -2.488512520460 | 0.740794270861  | 4.236042982972  |

# EQ-SiO<sub>2</sub> 45

|    |                 |                 |                 |
|----|-----------------|-----------------|-----------------|
| O  | -3.465750448041 | -2.466622533100 | 1.972807691451  |
| O  | -1.102729851925 | -1.825260632065 | 2.293737211826  |
| O  | -0.108216120978 | 0.212118399769  | 0.284302734616  |
| O  | 3.210972938408  | -0.203633562107 | -1.787557376920 |
| O  | -2.826782826104 | 0.842442733940  | 0.613946909007  |
| O  | -2.076588510302 | -1.755837824899 | -0.080903608452 |
| O  | 1.614212314242  | -2.466620872282 | 1.972783279131  |
| O  | 3.977220211640  | -1.825291985959 | 2.293731319853  |
| O  | 4.971686916263  | 0.212082210701  | 0.284276086395  |
| O  | 8.290909042451  | -0.203654215079 | -1.787567024491 |
| O  | 2.253153914986  | 0.842500490534  | 0.613971555489  |
| O  | 3.003335049209  | -1.755864509515 | -0.080922557656 |
| Si | 3.396646052184  | -0.045230161187 | -0.037961334346 |
| Si | -4.606943208153 | -1.573771356249 | 2.623149985152  |
| Si | -1.956106081712 | -3.029053595976 | 1.288778233936  |
| Si | 0.472991896016  | -1.573776499636 | 2.623101118664  |
| Si | -1.683254345916 | -0.045215778455 | -0.037975604916 |
| Si | 3.123829369013  | -3.029101419323 | 1.288765784912  |
| TV | 10.159833023087 | 0.000000000002  | 0.000000000002  |
| TV | 2.702128372859  | 4.444308738935  | 0.000000000000  |
| TV | -2.340536938472 | 0.338180101830  | 4.456830701561  |

# EQ-SiO<sub>2</sub> 46

|    |                 |                 |                 |
|----|-----------------|-----------------|-----------------|
| O  | -4.203630487831 | -3.290822299184 | 2.608687117212  |
| O  | -0.285543585528 | -3.462636613066 | 0.240945928219  |
| O  | -0.548797496010 | 0.260451367348  | 0.502263952391  |
| O  | 0.977965284189  | -1.026060792772 | -2.114277637590 |
| O  | 0.109518860490  | 2.941992705215  | -0.020221904576 |
| O  | -3.532197648694 | -0.602676759270 | 2.101468006374  |
| O  | -6.374247206401 | -3.621109580887 | 7.045390472967  |
| O  | -2.456369507579 | -3.793685713844 | 4.676598122172  |
| O  | -2.719505719639 | -0.070536786666 | 4.938934116713  |
| O  | -1.192685708357 | -1.356280887631 | 2.322374860652  |
| O  | -2.061639034030 | 2.611596505999  | 4.416822911445  |
| O  | -5.703175627165 | -0.932734143126 | 6.538435815820  |
| Si | -1.616996007803 | 0.915781663497  | 4.354564445935  |
| Si | -4.641208096723 | -1.592541942863 | 2.669326307589  |
| Si | -4.456594195321 | -4.630671089309 | 1.293031119456  |
| Si | -6.812052235686 | -1.922867774225 | 7.106159148011  |
| Si | 0.554031517140  | 1.246256560638  | -0.082170165940 |
| Si | -6.627616585038 | -4.961162376530 | 5.729667794535  |
| TV | 5.017579101211  | 0.000000000001  | 0.000000000001  |
| TV | 2.412548491274  | 4.456549250085  | 0.000000000001  |
| TV | -4.341719213741 | -0.660541033861 | 8.873846419746  |

# EQ-SiO<sub>2</sub> 47

|    |                 |                 |                 |
|----|-----------------|-----------------|-----------------|
| O  | -1.520141958989 | -2.123940445401 | 2.440978228295  |
| O  | 0.263815372420  | -3.008291334899 | 1.340648350409  |
| O  | -1.583992308936 | 1.171113648851  | 0.120803369295  |
| O  | 0.310802130062  | -0.074025810019 | -1.399246265390 |
| O  | -3.260699993329 | -0.328207836088 | 1.478207681796  |
| O  | -1.581056436408 | -1.687995325622 | -0.208430585632 |
| O  | 2.071817054363  | -2.124259420184 | 2.441026062139  |
| O  | 3.855808857749  | -3.007777374686 | 1.339844627017  |
| O  | 2.007804962607  | 1.171460446440  | 0.120351667381  |
| O  | 3.902887497347  | -0.074148343667 | -1.399346349449 |
| O  | 0.331547572204  | -0.328208652501 | 1.478503692062  |
| O  | 2.010360219677  | -1.687585723435 | -0.208505260849 |
| Si | 1.160455928106  | -0.258933463246 | 0.021369937647  |
| Si | -3.317616168006 | -1.656217478814 | 2.503950284665  |
| Si | -1.528706359521 | -2.972259334650 | 0.872565583520  |
| Si | 0.274251376673  | -1.656256407395 | 2.504145118728  |
| Si | -2.431250185592 | -0.259322873691 | 0.021314177954  |
| Si | 2.062924814161  | -2.971966738826 | 0.872284084133  |
| TV | 7.183757359717  | 0.000000000002  | 0.000000000002  |
| TV | -0.111408942372 | 5.608589938851  | -0.000000000000 |
| TV | -0.094128203307 | -1.144555533055 | 5.491848898253  |

# EQ-SiO<sub>2</sub> 48

|    |                 |                 |                 |
|----|-----------------|-----------------|-----------------|
| O  | -1.901243265748 | -2.705364693205 | 3.493195815822  |
| O  | 0.016388545016  | -0.962016875206 | -0.079863504045 |
| O  | -1.841775771545 | 0.089259976282  | 1.235909562106  |
| O  | 2.012266628840  | -0.821406584932 | -2.834517210195 |
| O  | -2.586969859457 | 0.603930223545  | -1.113700217537 |
| O  | -3.711035401240 | -1.627743697435 | 1.964145004417  |
| O  | -2.348941314063 | 0.049629594278  | 3.493196128853  |
| O  | -0.431259084560 | 1.792947780911  | -0.079897965133 |
| O  | -2.289462020633 | 2.844204434223  | 1.235916015493  |
| O  | 1.564615443323  | 1.933597484148  | -2.834561459186 |
| O  | -3.034654157576 | 3.358877351125  | -1.113695577266 |
| O  | -4.158724423278 | 1.127203516275  | 1.964200459725  |
| Si | -1.472202174486 | 3.046589192188  | -0.459487945200 |
| Si | -4.782873605654 | -2.249009507097 | 3.029122770620  |
| Si | -1.590937617884 | -4.097514453135 | 2.315772181785  |
| Si | -5.230619089141 | 0.505935366662  | 3.029130163546  |
| Si | -1.024511363648 | 0.291625570567  | -0.459518033065 |
| Si | -2.038682189886 | -1.342532340133 | 2.315815441287  |
| TV | 5.952933704323  | 0.000000000002  | 0.000000000000  |
| TV | -0.895415768049 | 5.509941652791  | -0.000000000016 |
| TV | -2.063065983703 | -0.203766429499 | 5.688229364845  |

# EQ-SiO<sub>2</sub> 49

|   |                 |                 |                 |
|---|-----------------|-----------------|-----------------|
| O | -3.790118977779 | -5.771256481763 | 3.416080387815  |
| O | -0.373242927778 | -4.459264262764 | 1.572928583893  |
| O | -2.478665671486 | 0.254287437771  | 1.031194310313  |
| O | 1.696023435190  | 0.021659879458  | -2.110558446926 |
| O | -0.831855841839 | 4.017904704633  | -0.696720699630 |
| O | -3.944040514576 | -2.071214185782 | 1.137659348259  |
| O | 1.237893021367  | -5.771287414496 | 3.416073099541  |
| O | 4.654694216460  | -4.459250111850 | 1.572954264462  |
| O | 2.549351733343  | 0.254286693765  | 1.031201176915  |

|    |                 |                 |                 |
|----|-----------------|-----------------|-----------------|
| O  | 6.724065172607  | 0.021749777156  | -2.110530825411 |
| O  | 4.196153648764  | 4.017912226778  | -0.696712041220 |
| O  | 1.083976574619  | -2.071254685347 | 1.137667930037  |
| Si | 4.040976024487  | 0.290088177516  | 0.250484481530  |
| Si | -5.035885440973 | -2.922417322692 | 2.088892533066  |
| Si | -3.165528359122 | -6.230645501240 | 1.927154299595  |
| Si | -0.007875912243 | -2.922439238366 | 2.088910545039  |
| Si | -0.987018373572 | 0.290074812418  | 0.250482996783  |
| Si | 1.862500877147  | -6.230665171367 | 1.927155827262  |
| TV | 10.056039745964 | -0.000000000032 | 0.000000000040  |
| TV | 0.353400274592  | 5.110242319163  | 0.000000000280  |
| TV | -3.096420096033 | -2.016881957740 | 4.279916098597  |

# EQ-SiO<sub>2</sub> 50

|    |                 |                 |                 |
|----|-----------------|-----------------|-----------------|
| O  | -4.091052865453 | 4.326101044088  | 2.681320037276  |
| O  | 4.033413372874  | -2.406927273385 | -3.358274511926 |
| O  | -2.039371677555 | 0.080677060692  | 0.677931486852  |
| O  | 2.021043006597  | -2.366336923437 | -1.355275517631 |
| O  | -4.086817197334 | 4.407427025289  | 6.687203886330  |
| O  | 4.037592737819  | -2.325556623466 | 0.647483503285  |
| O  | -2.034941729019 | 0.162754954177  | 4.684108141784  |
| O  | 2.025251224886  | -2.284656692887 | 2.650290086100  |
| O  | -4.082994671776 | 4.488226394010  | 10.692561104009 |
| O  | 4.041872564329  | -2.244108709876 | 4.653457856198  |
| O  | -2.030735045223 | 0.244400908661  | 8.690416296130  |
| O  | 2.029417876307  | -2.203461254466 | 6.656459266096  |
| Si | -3.037101604662 | 1.164039261601  | 9.673700359273  |
| Si | -1.028897258676 | 1.041992607367  | 3.664518142682  |
| Si | -1.024643451269 | 1.123274963604  | 7.670622108006  |
| Si | -3.045283160834 | 1.000836347690  | 1.661545740109  |
| Si | -3.041206268744 | 1.082442471101  | 5.667590731858  |
| Si | -1.033014033416 | 0.959973288417  | -0.341392028352 |
| TV | 4.028782046137  | 0.000000000013  | 0.000000000011  |
| TV | -4.068365037626 | 4.204015681792  | 0.000000000049  |
| TV | 0.012513344879  | 0.244329213852  | 12.017757370576 |

# EQ-SiO<sub>2</sub> 51

|    |                 |                 |                 |
|----|-----------------|-----------------|-----------------|
| O  | -2.906519247647 | -4.979506420429 | 4.211917354118  |
| O  | 0.852819630213  | -8.661725056781 | -1.798447667810 |
| O  | -1.347107279558 | 3.430565875843  | 0.489629109688  |
| O  | 0.952947971109  | -0.770268428175 | -1.015800483338 |
| O  | -2.992301325900 | 2.089683573696  | -1.123966329584 |
| O  | -4.194854024127 | -1.201486585935 | 2.249425752483  |
| O  | -5.348884692613 | -5.060907405382 | 8.248178778178  |
| O  | -1.610930974204 | -8.758707294028 | 2.244477773874  |
| O  | -3.788200634925 | 3.355694712193  | 4.528307267383  |
| O  | -1.529247984100 | -0.839365683948 | 2.949691307100  |
| O  | -5.454222402456 | 2.006025185857  | 2.921882339789  |
| O  | -6.633773361171 | -1.279922572178 | 6.289463865475  |
| Si | -3.879440110191 | 1.975047202241  | 3.388003499402  |
| Si | -5.683055018947 | -2.192607353134 | 2.301540605220  |
| Si | -2.519857436364 | -6.378434003961 | 3.403171214978  |
| Si | -8.124498616976 | -2.272544768266 | 6.346852162800  |
| Si | -1.416550446133 | 2.058531190231  | -0.659293006959 |
| Si | -4.964348748438 | -6.469494686156 | 7.456196539223  |
| TV | 4.965247989034  | 0.000000000001  | 0.000000000001  |
| TV | -0.587456645741 | 5.562896993219  | 0.000000000001  |



|                          |                  |                 |                 |
|--------------------------|------------------|-----------------|-----------------|
| TV                       | -4.909833986257  | -0.172833439934 | 8.075189734338  |
| # EQ-SiO <sub>2</sub> 52 |                  |                 |                 |
| O                        | -5.445430737560  | -1.465729749076 | 0.954932553522  |
| O                        | 2.139181649488   | 0.119242119702  | -0.090285937598 |
| O                        | 0.143404217586   | 1.875180613817  | -1.215570931419 |
| O                        | 7.967118862332   | 1.837692549625  | 0.740348588422  |
| O                        | -8.910477702193  | 2.568556888386  | 0.979922572958  |
| O                        | -1.205750103542  | 4.276084568619  | -0.130636736609 |
| O                        | -3.296846042527  | 5.952279094818  | -1.230776815381 |
| O                        | 4.541082427272   | 5.959431091660  | 0.728415395718  |
| O                        | -12.307111308080 | 6.689863346714  | 0.934626603514  |
| O                        | -4.592161802153  | 8.387794040753  | -0.130254194763 |
| O                        | -6.728904996648  | 9.999404990298  | -1.178192584339 |
| O                        | 1.217195055265   | 9.924640785740  | 0.883947695371  |
| Si                       | -13.773638362676 | 6.834940603228  | 0.058523383755  |
| Si                       | -1.828599544184  | 5.813638689900  | -0.357752225838 |
| Si                       | -5.231457659031  | 9.916266329820  | -0.346335959804 |
| Si                       | -6.947592381365  | -1.390845354622 | 0.127809057368  |
| Si                       | -10.359806671810 | 2.732761439927  | 0.078872191687  |
| Si                       | 1.586658616246   | 1.689857232683  | -0.302003438863 |
| TV                       | 9.771801572706   | 0.000000000010  | 0.000000000009  |
| TV                       | -10.248194571010 | 12.255317024670 | 0.000000000147  |
| TV                       | -1.177159741442  | -4.860238751230 | 1.798494390686  |

|                          |                 |                 |                 |
|--------------------------|-----------------|-----------------|-----------------|
| # EQ-SiO <sub>2</sub> 53 |                 |                 |                 |
| O                        | -1.433099234273 | -1.708755638650 | 3.225791745594  |
| O                        | 0.013865556391  | -3.155634394044 | 1.464466395668  |
| O                        | -1.439312128989 | 0.849480391045  | -0.304071313295 |
| O                        | 0.007218871602  | -0.489077744033 | -1.937167468294 |
| O                        | -2.881662295688 | -0.298117273963 | 1.454362187775  |
| O                        | -1.434825226891 | -1.686769661954 | -0.159528292717 |
| O                        | 1.456890664233  | -1.708827976859 | 3.225794487571  |
| O                        | 2.903943138902  | -3.155452714947 | 1.464420943611  |
| O                        | 1.450771060826  | 0.849470466332  | -0.304003736315 |
| O                        | 2.897262434804  | -0.489093814181 | -1.937120696341 |
| O                        | 0.008344646121  | -0.298099466355 | 1.454294878392  |
| O                        | 1.455172053397  | -1.686729978770 | -0.159444967611 |
| Si                       | 0.009135081966  | -0.423864543674 | -0.242581167885 |
| Si                       | -2.877948880028 | -0.853566489757 | 3.001924002047  |
| Si                       | -1.430908587021 | -3.172179063983 | 0.666978038347  |
| Si                       | 0.012074921005  | -0.853562744967 | 3.001850582546  |
| Si                       | -2.880869810173 | -0.423933468377 | -0.242524066366 |
| Si                       | 1.459094379010  | -3.172108350691 | 0.667022851011  |
| TV                       | 5.780055243673  | 0.000000000000  | 0.000000000002  |
| TV                       | -0.012372299391 | 5.424992601412  | -0.000000000000 |
| TV                       | 0.007387878267  | 0.909948663973  | 6.000491483508  |

|                          |                 |                 |                 |
|--------------------------|-----------------|-----------------|-----------------|
| # EQ-SiO <sub>2</sub> 54 |                 |                 |                 |
| O                        | -2.763529335781 | 0.703736384200  | 3.462264278642  |
| O                        | -1.058344835578 | -1.535746599988 | 2.845994498789  |
| O                        | -1.089479744900 | 0.032366055118  | -1.090934267825 |
| O                        | 0.611120095988  | -2.061607686878 | -1.426716365111 |
| O                        | -4.461319584538 | 0.642593769524  | 1.510954536109  |
| O                        | -1.065227572415 | -2.664848760313 | -0.028693419949 |
| O                        | 0.609946062036  | 0.706689280691  | 3.461725825614  |
| O                        | 2.296303919159  | -1.540534560174 | 2.848237498861  |

|    |                 |                 |                 |
|----|-----------------|-----------------|-----------------|
| O  | 2.275351230994  | 0.032961854082  | -1.093503850085 |
| O  | 3.976443873900  | -2.057319316411 | -1.405844140718 |
| O  | -1.095452855391 | 0.648319399901  | 1.514062440693  |
| O  | 2.292198070305  | -2.665893894020 | -0.028267508932 |
| Si | 2.295251613938  | -1.729051473041 | -1.710344980130 |
| Si | -4.440574417376 | 0.100642067489  | 3.093054225602  |
| Si | 0.616495087956  | -3.338314010114 | 0.030835277085  |
| Si | -1.074582979363 | 0.105766259354  | 3.097431424641  |
| Si | -1.072785940249 | -1.729420558815 | -1.706725530285 |
| Si | 3.981463829864  | -3.336630523958 | 0.031649170374  |
| TV | 6.731579690382  | -0.000000000002 | 0.000000000002  |
| TV | 1.661213594494  | 4.647352884683  | 0.000000000001  |
| TV | -1.689133869631 | 4.080426921511  | 6.078940340140  |

# EQ-SiO<sub>2</sub> 55

|    |                 |                 |                 |
|----|-----------------|-----------------|-----------------|
| O  | -1.088466728357 | -6.013546833744 | 4.593354052318  |
| O  | -0.839351801527 | -4.159552491156 | -0.241130142080 |
| O  | -1.199391832459 | 1.772145849837  | 2.709652095241  |
| O  | -0.947742825612 | -1.053261868077 | -1.934112182664 |
| O  | -1.002560893565 | 3.736802770767  | -2.430496902876 |
| O  | -2.314215502359 | -1.620945945300 | 0.180143772016  |
| O  | 1.661957154613  | -6.013519793973 | 4.593365556106  |
| O  | 1.911079805791  | -4.159444673122 | -0.241234665707 |
| O  | 1.550973030597  | 1.772175589563  | 2.709647495220  |
| O  | 1.802623115686  | -1.053242518045 | -1.934143691208 |
| O  | 1.747800770853  | 3.736816491663  | -2.430470694359 |
| O  | 0.436205362362  | -1.620932153040 | 0.180185464144  |
| Si | 1.795841535327  | 2.116091734610  | -0.932552156332 |
| Si | -2.516490232985 | -1.936364784747 | 1.741350227837  |
| Si | -2.464574774511 | -6.810172863939 | 3.734693475554  |
| Si | 0.233872419697  | -1.936343311104 | 1.741378232245  |
| Si | -0.954536665533 | 2.116058882136  | -0.932565479673 |
| Si | 0.285815096453  | -6.810158917804 | 3.734709519588  |
| TV | 5.500748185754  | 0.000000000002  | 0.000000000002  |
| TV | 1.260508035119  | 7.065136212221  | 0.000000000001  |
| TV | 1.126275366865  | 0.529497080720  | 4.639922657967  |

# EQ-SiO<sub>2</sub> 56

|    |                 |                 |                 |
|----|-----------------|-----------------|-----------------|
| O  | -0.979326510231 | -3.674028468877 | 1.558463565497  |
| O  | -0.085293344765 | -0.903807213658 | 0.560364489323  |
| O  | -1.644283621286 | 1.738756735224  | 0.560720999999  |
| O  | -0.138325471168 | -3.049911426088 | -0.817195139554 |
| O  | -2.979025845561 | -0.691839332154 | 1.544174842226  |
| O  | -2.084258700802 | -0.127812552108 | -0.820521911766 |
| O  | -1.601285486781 | -0.392930644919 | 4.870077216801  |
| O  | -0.707212540360 | 2.377315885686  | 3.872100066434  |
| O  | -2.266213196113 | 5.019875532291  | 3.872404704679  |
| O  | -0.760193274775 | 0.231244881832  | 2.494466865957  |
| O  | -3.600919352908 | 2.589286931027  | 4.855886950266  |
| O  | -2.706230754085 | 3.153313360472  | 2.491188837304  |
| Si | -2.237347573548 | 3.256403238767  | 4.238659196738  |
| Si | -4.561959252283 | -0.205979938746 | 1.997254652630  |
| Si | 0.141110895775  | -2.659556727708 | 0.927504030416  |
| Si | -5.183888166403 | 3.075108219638  | 5.308949889977  |
| Si | -1.615431378731 | -0.024730039818 | 0.926958393046  |
| Si | -0.480825133129 | 0.621550931365  | 4.239186741362  |
| TV | 5.528036716650  | 0.000000000001  | 0.000000000001  |

|    |                 |                |                 |
|----|-----------------|----------------|-----------------|
| TV | -3.399848595455 | 5.116548716130 | -0.000000000000 |
| TV | -1.243842970576 | 6.562241550855 | 6.623386520038  |

# EQ-SiO<sub>2</sub> 57

|    |                 |                 |                 |
|----|-----------------|-----------------|-----------------|
| O  | -3.013040318804 | -5.883704703669 | 4.083079649423  |
| O  | 0.069291176988  | -3.183816642917 | 0.610524702331  |
| O  | -2.456909315362 | 1.093101021065  | 1.461974435630  |
| O  | 1.766865231916  | 0.138622825652  | -2.837525977684 |
| O  | -2.063630565899 | 2.084652023725  | -1.572033877515 |
| O  | -2.825198507998 | -1.398736238248 | 1.741407808742  |
| O  | 2.012163127496  | -5.885999808438 | 3.971382259662  |
| O  | 4.968067312669  | -3.170087879704 | 0.594725565114  |
| O  | 2.351175542905  | 1.068919658225  | 1.230877924524  |
| O  | 6.553471313387  | 0.157532315275  | -2.878175921741 |
| O  | 2.932373965071  | 2.073103334212  | -1.633788752013 |
| O  | 2.037681354357  | -1.415616401040 | 1.603402046700  |
| Si | 3.954337678393  | 0.716368961635  | 0.680743580217  |
| Si | -3.510123173823 | -2.864463028917 | 1.752600341841  |
| Si | -3.441739283548 | -5.315600861333 | 2.565478228411  |
| Si | 1.352734900466  | -2.882715501513 | 1.652539471265  |
| Si | -0.925937067264 | 0.698063619788  | 0.781883631339  |
| Si | 1.483995025516  | -5.335456229017 | 2.475102180737  |
| TV | 9.652010578593  | 0.000000000002  | 0.000000000002  |
| TV | -0.118688042585 | 5.300672817331  | 0.000000000001  |
| TV | -1.974193032489 | -0.463934208185 | 4.710780948921  |

# EQ-SiO<sub>2</sub> 58

|    |                 |                 |                 |
|----|-----------------|-----------------|-----------------|
| O  | -0.861443833500 | -4.918995972711 | 3.544716855773  |
| O  | -0.395133249421 | -3.554403991179 | 0.387541417942  |
| O  | -1.718306016501 | 1.174040960651  | 1.456369220080  |
| O  | -0.455541041773 | -1.749910275112 | -1.530921382249 |
| O  | -1.425661741458 | 2.626363644555  | -1.663067352830 |
| O  | -1.810256866645 | -1.417914660259 | 0.573328703875  |
| O  | 1.929247914508  | -4.918964374034 | 3.544730530566  |
| O  | 2.395517459576  | -3.554420767981 | 0.387526820393  |
| O  | 1.072359484503  | 1.174138528973  | 1.456434249237  |
| O  | 2.335116804787  | -1.749907658214 | -1.530923722949 |
| O  | 1.365000554109  | 2.626361470444  | -1.663072795180 |
| O  | 0.980414636463  | -1.417908588099 | 0.573323353523  |
| Si | 1.535044627199  | 1.977218806276  | 0.115941054714  |
| Si | -3.176690787657 | -2.040184012889 | 1.548789450624  |
| Si | -2.182012787756 | -6.064982889513 | 2.988162769371  |
| Si | -0.386026510094 | -2.040169720302 | 1.548786860232  |
| Si | -1.255625127761 | 1.977216606408  | 0.115927161310  |
| Si | 0.608667768305  | -6.064971942524 | 2.988180780940  |
| TV | 5.581336299844  | 0.000000000002  | 0.000000000002  |
| TV | 0.463526323695  | 6.573965240934  | 0.000000000001  |
| TV | 0.125120602817  | 1.169336177191  | 4.151297495936  |

# EQ-SiO<sub>2</sub> 59

|   |                 |                 |                 |
|---|-----------------|-----------------|-----------------|
| O | -2.073884852910 | 5.053597946436  | 0.251828223693  |
| O | 3.369706848830  | -8.413814259634 | -2.453458806192 |
| O | -0.705630688709 | 3.170655806571  | 0.916430951867  |
| O | -0.734917902015 | -1.227037202447 | -1.020405600393 |
| O | 0.663029322600  | 5.053571473532  | 0.251841336674  |
| O | 6.106672659330  | -8.413879979292 | -2.453377930852 |
| O | 2.031415179995  | 3.170704485421  | 0.916412616660  |

|    |                 |                 |                 |
|----|-----------------|-----------------|-----------------|
| O  | 2.002119136623  | -1.226882106544 | -1.020487299438 |
| O  | 3.400101472059  | 5.053557024389  | 0.251747183094  |
| O  | 8.843576911649  | -8.413874066542 | -2.453524890085 |
| O  | 4.768386673271  | 3.170667822688  | 0.916489295717  |
| O  | 4.739011030222  | -1.227070677497 | -1.020481387268 |
| Si | 3.356897348976  | 4.011107394067  | 1.787139758668  |
| Si | 1.957294701746  | -0.456008627357 | 0.669411590708  |
| Si | 4.694300359824  | -0.456097284162 | 0.669402852308  |
| Si | -2.117150636481 | 4.010967190670  | 1.787100364115  |
| Si | 0.619860314105  | 4.011042099168  | 1.787129375326  |
| Si | -0.779729145722 | -0.455930669783 | 0.669422220718  |
| TV | 8.211034149242  | 0.000000000030  | 0.000000000027  |
| TV | -1.282591785299 | 9.132469559385  | 0.000000000127  |
| TV | -1.455553113413 | -0.201367585794 | 2.407175291574  |

# EQ-SiO<sub>2</sub> 60

|    |                 |                 |                 |
|----|-----------------|-----------------|-----------------|
| O  | -2.350926166385 | -3.191786092664 | 2.506943397602  |
| O  | 0.479184359682  | -3.711164432609 | 1.591095837759  |
| O  | -2.112132793728 | 0.840503498072  | 0.114920349324  |
| O  | 1.208102089871  | -2.446661565271 | -1.669234161213 |
| O  | -0.195145604024 | 2.428936319342  | 0.148699734590  |
| O  | -3.521118952260 | -1.186001269707 | 1.232255935633  |
| O  | -4.485965472715 | -1.259356793967 | 5.838732149632  |
| O  | -1.655860036358 | -1.778729864081 | 4.922862622060  |
| O  | -4.247205191654 | 2.772986714501  | 3.446753694012  |
| O  | -0.926892922533 | -0.514214497435 | 1.662571796293  |
| O  | -2.330167770789 | 4.361415481384  | 3.480487487312  |
| O  | -5.656153651608 | 0.746409444510  | 4.564059247915  |
| Si | -2.482969175431 | 2.593991283603  | 3.757730389346  |
| Si | -4.940162663016 | -1.915507113991 | 1.672989414996  |
| Si | -3.128171662125 | -4.655734695421 | 1.813910080960  |
| Si | -7.075198057486 | 0.016928171569  | 5.004801205284  |
| Si | -0.347896862034 | 0.661497933117  | 0.425947020491  |
| Si | -5.263198078086 | -2.723333837993 | 5.145726380364  |
| TV | 5.139755202298  | 0.000000000001  | 0.000000000001  |
| TV | 0.445472529006  | 4.864500860737  | 0.000000000001  |
| TV | -4.270058737444 | 3.864891253896  | 6.663627907421  |

# EQ-SiO<sub>2</sub> 61

|    |                |                 |                 |
|----|----------------|-----------------|-----------------|
| O  | 2.179019960935 | -0.570792692418 | 2.111981926639  |
| O  | 0.747972553300 | -2.280270400920 | 0.653574958996  |
| O  | 0.792927718722 | 1.842683183234  | 0.654946518628  |
| O  | 2.225148079459 | 3.562622786275  | -0.799894613815 |
| O  | 5.038702784898 | -0.570639255156 | 2.112066301443  |
| O  | 3.607856162863 | -2.280193501225 | 0.653630290003  |
| O  | 3.652634208033 | 1.842674637077  | 0.654940158383  |
| O  | 5.084828607964 | 3.562538047874  | -0.799829743370 |
| O  | 7.898462963813 | -0.570676092842 | 2.112023409426  |
| O  | 6.467523904460 | -2.280192144478 | 0.653601896836  |
| O  | 6.512303203987 | 1.842529482064  | 0.654891972342  |
| O  | 7.944466571033 | 3.562578188118  | -0.799891959958 |
| Si | 6.494499046919 | -5.543271520966 | 2.113967635284  |
| Si | 3.609054358284 | -1.452639990878 | 2.112601449728  |
| Si | 6.468757107635 | -1.452593637464 | 2.112588961137  |
| Si | 0.775106168568 | -5.543097359919 | 2.113980740951  |
| Si | 3.634810689556 | -5.543176200018 | 2.114008133609  |
| Si | 0.749312867315 | -1.452681769195 | 2.112546012322  |

|    |                 |                 |                 |
|----|-----------------|-----------------|-----------------|
| TV | 8.579106112254  | -0.000000000000 | -0.000000000000 |
| TV | 0.015729256913  | 8.214146190571  | 0.000000000000  |
| TV | -0.004734078947 | -0.009326252077 | 2.912653666130  |

# EQ-SiO<sub>2</sub> 62

|    |                 |                 |                 |
|----|-----------------|-----------------|-----------------|
| O  | -2.295520272399 | -2.478929763410 | 3.573036508073  |
| O  | 0.546675008622  | -2.499789064743 | 0.512786906325  |
| O  | -1.846849784520 | 0.401301340558  | 1.235981949261  |
| O  | 1.824800192634  | -1.084927474252 | -2.796110858827 |
| O  | -1.803531676565 | 1.846049100882  | -0.762772226672 |
| O  | -3.784138314894 | -1.002731011736 | 2.006545070620  |
| O  | -2.260602438907 | 0.401399126341  | 3.573033610263  |
| O  | 0.581604848513  | 0.380542402579  | 0.512784427601  |
| O  | -1.811923746876 | 3.281630406335  | 1.235982919251  |
| O  | 1.859712544939  | 1.795407913541  | -2.796126683186 |
| O  | -1.768622674270 | 4.726380789769  | -0.762775938255 |
| O  | -3.749218702914 | 1.877605069625  | 2.006549163961  |
| Si | -1.073180049290 | 3.278043255121  | -0.410281206978 |
| Si | -5.295109493949 | -1.063584937371 | 1.574732433808  |
| Si | -2.097741312279 | -3.920174199605 | 2.394847955130  |
| Si | -5.260187386903 | 1.816749213639  | 1.574729726999  |
| Si | -1.108097993949 | 0.397707164714  | -0.410279005218 |
| Si | -2.062820371874 | -1.039845289595 | 2.394849788150  |
| TV | 6.132726796540  | 0.000000000001  | 0.000000000001  |
| TV | 0.069837196612  | 5.760661925535  | 0.000000000002  |
| TV | -2.138009214753 | 0.017504462734  | 5.498925932256  |

# EQ-SiO<sub>2</sub> 63

|    |                 |                 |                 |
|----|-----------------|-----------------|-----------------|
| O  | -2.809730090327 | -2.667715400865 | 2.348890304543  |
| O  | -0.588860740701 | -1.854688011201 | 2.164449421802  |
| O  | -0.846053408320 | 0.873333984146  | 0.017449862843  |
| O  | 1.863563750102  | -0.011890036913 | -1.562594833657 |
| O  | -3.308372819597 | -0.120799352325 | 1.092994605392  |
| O  | -1.289268947139 | -1.740963141304 | -0.167668411569 |
| O  | -0.637858356376 | 1.560187691058  | 2.348876594615  |
| O  | 1.583064248375  | 2.373388973832  | 2.164533341033  |
| O  | 1.325917499842  | 5.101310929104  | 0.017483192993  |
| O  | 4.035571940086  | 4.216175166009  | -1.562563353247 |
| O  | -1.136388460547 | 4.107110759539  | 1.093011221153  |
| O  | 0.882635111027  | 2.486959929060  | -0.167621683054 |
| Si | 0.205376300715  | 3.975425601061  | -0.202482159215 |
| Si | -3.817537453378 | -1.378596567163 | 2.386619595354  |
| Si | -1.691142472066 | -2.788634326030 | 1.092459709777  |
| Si | -1.645571897199 | 2.849381619521  | 2.386681614641  |
| Si | -1.966586788301 | -0.252520992811 | -0.202550350913 |
| Si | 0.480800557429  | 1.439320468531  | 1.092495731234  |
| TV | 4.745147088275  | 0.000000000001  | 0.000000000001  |
| TV | 4.343860393305  | 8.455865664626  | 0.000000000002  |
| TV | -0.735958780421 | -0.438184849983 | 5.304468135561  |

# EQ-SiO<sub>2</sub> 64

|   |                 |                 |                 |
|---|-----------------|-----------------|-----------------|
| O | -2.625577175977 | -1.998863703342 | 1.182779327041  |
| O | 0.054798882874  | -1.415484213145 | 2.188409490226  |
| O | -2.214604929390 | 0.568243172184  | 0.149443418992  |
| O | 2.463324887890  | -1.847369526750 | -1.519548645962 |
| O | -2.290923115803 | -0.054178349950 | 3.259769921419  |
| O | 0.042269342289  | -0.817550568853 | -0.479316454699 |

|    |                 |                 |                 |
|----|-----------------|-----------------|-----------------|
| O  | -4.895333479791 | 2.038729149768  | 1.182762511339  |
| O  | -2.214917283725 | 2.621840639545  | 2.188585169972  |
| O  | -4.484738753185 | 4.606272101878  | 0.149497608282  |
| O  | 0.193124759049  | 2.190236524974  | -1.519311832051 |
| O  | -4.560646109852 | 3.983230043604  | 3.259934108200  |
| O  | -2.227886662346 | 3.220047232299  | -0.478803098483 |
| Si | -3.761518044493 | 3.609016291403  | -0.970122727643 |
| Si | -3.127673971533 | -1.434863516376 | 2.723806469635  |
| Si | 0.522986329156  | -1.958202367335 | 0.634489363560  |
| Si | -5.397343386646 | 2.602603544831  | 2.723884196077  |
| Si | -1.491435916481 | -0.428568303810 | -0.970419488344 |
| Si | -1.747001304904 | 2.078983724411  | 0.634625066166  |
| TV | 4.795039374700  | 0.000000000004  | 0.000000000004  |
| TV | -4.539529440896 | 8.074984170274  | 0.000000000004  |
| TV | -0.566296780351 | -0.320537798917 | 5.777902976863  |

# EQ-SiO<sub>2</sub> 65

|    |                 |                 |                 |
|----|-----------------|-----------------|-----------------|
| O  | -2.999436855771 | 2.008225496836  | 1.518485007620  |
| O  | 3.988907092761  | -1.193804017494 | -5.401597026665 |
| O  | -1.297641139122 | 0.219105380377  | 2.748788461258  |
| O  | -0.285007719677 | 1.307911194356  | -4.185543680376 |
| O  | -5.563792181209 | 6.295487671739  | 1.518460208963  |
| O  | 1.424518965431  | 3.093386364990  | -5.401552419679 |
| O  | -3.861871529733 | 4.506401775565  | 2.748646811255  |
| O  | -2.849256391895 | 5.595225161549  | -4.185568107607 |
| O  | -8.128162178779 | 10.582647530566 | 1.518446702849  |
| O  | -1.139681085855 | 7.380517788685  | -5.401440913099 |
| O  | -6.426223450536 | 8.793446500716  | 2.748791005090  |
| O  | -5.413630432902 | 9.882365495150  | -4.185570755289 |
| Si | -7.983238191340 | 9.383602833964  | 2.739326327266  |
| Si | -2.860876680972 | 3.206680733780  | 2.738942454760  |
| Si | -5.425194971461 | 7.493833564851  | 2.738968424121  |
| Si | -2.854658588920 | 0.809227565756  | 2.739386337182  |
| Si | -5.418955393367 | 5.096430367347  | 2.739339666070  |
| Si | -0.296617563062 | -1.080563918488 | 2.738989870908  |
| TV | 5.112411686160  | 0.000000000012  | 0.000000000012  |
| TV | -7.692962910202 | 12.861588301834 | 0.000000000204  |
| TV | -0.162822326155 | -3.587043833568 | 8.144271936783  |

# EQ-SiO<sub>2</sub> 66

|    |                 |                 |                 |
|----|-----------------|-----------------|-----------------|
| O  | -0.133738256288 | -3.051278949952 | 1.722418290364  |
| O  | 1.835313976931  | -3.227302187443 | 0.484434563214  |
| O  | -2.162894635670 | -0.449551837217 | 0.376989662036  |
| O  | -0.021501932904 | -1.631215275487 | -0.521135732365 |
| O  | -3.814886833896 | 1.285354773177  | -0.638496942709 |
| O  | -4.290587111025 | -0.789358530467 | 1.711663325472  |
| O  | -1.149722538260 | -2.161928105950 | 4.968250681241  |
| O  | 0.820440141038  | -2.337966874472 | 3.731212219946  |
| O  | -3.176963629994 | 0.438984223685  | 3.623396803960  |
| O  | -1.035972146443 | -0.742874718849 | 2.724622528579  |
| O  | -4.828777392480 | 2.172314502477  | 2.607758270271  |
| O  | -5.306065847082 | 0.101150231673  | 4.957022927118  |
| Si | -3.088490789878 | 2.159030835913  | 3.178807169386  |
| Si | -4.389019880211 | -2.410301918213 | 2.105842728508  |
| Si | -0.520434937988 | -5.067193172803 | 2.149925581570  |
| Si | -5.404336865261 | -1.519811534998 | 5.351637998346  |
| Si | -2.073980258501 | 1.270701175905  | -0.067485738166 |

|    |                 |                 |                 |
|----|-----------------|-----------------|-----------------|
| Si | -1.535630208665 | -4.177165223693 | 5.396172838611  |
| TV | 6.042883216108  | -0.000000000000 | -0.000000000000 |
| TV | -2.109891557123 | 4.544724356564  | 0.000000000002  |
| TV | -2.029485157747 | 1.778529297879  | 6.492492395458  |

# EQ-SiO<sub>2</sub> 67

|    |                 |                 |                 |
|----|-----------------|-----------------|-----------------|
| O  | -1.349331783682 | -0.888997616322 | 2.226171675926  |
| O  | 0.226610149090  | -2.524981385969 | 1.686854736047  |
| O  | -0.855752712615 | 0.515418446695  | -0.503662855091 |
| O  | 0.776716033706  | -1.721849206350 | -1.272234586590 |
| O  | -3.123917656704 | 0.308597935687  | 0.768593193414  |
| O  | -2.225802296242 | -2.013415879525 | -0.062002482442 |
| O  | -0.888051348454 | 2.219703108148  | 6.183342236297  |
| O  | 0.687904465533  | 0.583723580129  | 5.644033390470  |
| O  | -0.394465796888 | 3.624133644490  | 3.453501514072  |
| O  | 1.238014196432  | 1.386871735300  | 2.684962815910  |
| O  | -2.662620076829 | 3.417309954014  | 4.725766195099  |
| O  | -1.764508950545 | 1.095308846767  | 3.895174707827  |
| Si | -1.876464652398 | 2.913461781316  | 3.247943977612  |
| Si | -2.771831146025 | 0.055244215551  | 2.620658892241  |
| Si | -1.420569741346 | -2.554657412246 | 1.299275402637  |
| Si | -2.310539018151 | 3.163968907393  | 6.577826075627  |
| Si | -2.337743444853 | -0.195269534021 | -0.709230229934 |
| Si | -0.959274793232 | 0.554062629272  | 5.256440788102  |
| TV | 5.135732623554  | -0.000000000000 | 0.000000000001  |
| TV | 3.255945037573  | 4.701127228763  | 0.000000000000  |
| TV | 0.922579976525  | 6.217443757186  | 7.914351567847  |

# EQ-SiO<sub>2</sub> 68

|    |                 |                 |                 |
|----|-----------------|-----------------|-----------------|
| O  | -2.403465705816 | 1.517571110953  | 0.128576233586  |
| O  | 1.828263862644  | -1.352495914174 | -2.313658880420 |
| O  | -0.760228410702 | 1.012376265769  | 2.173076771166  |
| O  | 0.303494430432  | 0.672256289824  | -0.519537502573 |
| O  | -1.550236875993 | 4.335102053094  | 0.141859518206  |
| O  | 2.694363421409  | 1.458267438683  | -2.321847612249 |
| O  | 0.113260778037  | 3.856370299641  | 2.174904111785  |
| O  | 1.163937269833  | 3.486661886224  | -0.544912923328 |
| O  | -0.665916171683 | 7.150236886902  | 0.139731492334  |
| O  | 3.566965047515  | 4.269195100852  | -2.310217267606 |
| O  | 0.985862255194  | 6.674265162950  | 2.185387637036  |
| O  | 2.039029836250  | 6.302180496518  | -0.531372914166 |
| Si | -0.496077497197 | 7.103489416559  | 1.736613324192  |
| Si | 1.296816047932  | 1.902448535488  | -1.045807850687 |
| Si | 2.164852293417  | 4.720532339805  | -1.044638012497 |
| Si | -2.235119729418 | 1.471056470380  | 1.727215278512  |
| Si | -1.370603261241 | 4.291777196206  | 1.736556195002  |
| Si | 0.433189120091  | -0.906577750501 | -1.036629223948 |
| TV | 4.981145130401  | 0.000000000010  | 0.000000000009  |
| TV | 2.602773414653  | 8.443352757893  | 0.000000000144  |
| TV | -1.133191721418 | -1.160517258366 | 4.710303110704  |

# EQ-SiO<sub>2</sub> 69

|   |                 |                 |                 |
|---|-----------------|-----------------|-----------------|
| O | -3.860043660706 | -2.510587640353 | 1.513028340956  |
| O | 7.862181817552  | -2.381299325980 | 2.085287369279  |
| O | -3.854223610984 | 1.001692577012  | -0.094028814269 |
| O | 7.594527680161  | 1.104612301550  | 0.189887881350  |
| O | -4.934055736829 | -0.071194910207 | 2.171557059203  |

|    |                 |                 |                 |
|----|-----------------|-----------------|-----------------|
| O  | -5.402540618971 | -1.335538940759 | -0.311256105631 |
| O  | -1.684445058323 | -5.487662549340 | 5.629088573647  |
| O  | 10.021748958464 | -5.274016010576 | 6.112212239676  |
| O  | -1.647684436600 | -1.927563540960 | 3.965301283978  |
| O  | 9.797453641596  | -1.871517616121 | 4.257150734239  |
| O  | -2.699303745174 | -3.010014415205 | 6.241569271807  |
| O  | -3.127359623125 | -4.275302027011 | 3.745143690042  |
| Si | -2.946707513646 | -2.823446541334 | 4.581502089968  |
| Si | -4.810768181533 | -1.674006925798 | 2.693214151996  |
| Si | -5.331433784413 | -2.721122453877 | 0.658480620685  |
| Si | -2.647598584730 | -4.615185725820 | 6.770192360127  |
| Si | -5.170926941323 | 0.118568560379  | 0.512554301954  |
| Si | -3.126836903714 | -5.654504981729 | 4.722706148896  |
| TV | 14.108140370584 | 0.000000000001  | -0.000000000001 |
| TV | 1.889821707083  | 5.137290966765  | -0.000000000001 |
| TV | 4.319641172355  | -5.943441568156 | 8.154273791594  |

# EQ-SiO<sub>2</sub> 70

|    |                 |                 |                 |
|----|-----------------|-----------------|-----------------|
| O  | -2.365134610842 | -4.870332519070 | 1.912083144226  |
| O  | -0.640571761189 | -4.241742489631 | 0.206971543300  |
| O  | -0.647517472262 | 0.821717483271  | 0.211138808939  |
| O  | -0.650009007941 | -1.424655502224 | -1.494055184460 |
| O  | -0.651843830792 | 4.810790282913  | 0.211205465046  |
| O  | -2.372005747563 | 0.062885087711  | 1.916053793048  |
| O  | -2.362260885680 | -4.862896814796 | 5.319049896487  |
| O  | -0.637601747914 | -4.234277583664 | 3.613928765448  |
| O  | -0.644630613158 | 0.829099875070  | 3.618076230722  |
| O  | -0.647161616122 | -1.417140756724 | 1.912808181682  |
| O  | -0.648988324112 | 4.818246974949  | 3.618020295325  |
| O  | -2.369127316441 | 0.070247206895  | 5.322990337410  |
| Si | -0.644382863355 | 2.805074155542  | 3.615013627701  |
| Si | -2.371234411730 | -1.686387885538 | 1.914492478954  |
| Si | -2.364886556318 | -6.659483973759 | 1.914687724404  |
| Si | -2.368338219562 | -1.679023433553 | 5.321361623730  |
| Si | -0.647380546189 | 2.797634644044  | 0.208071244935  |
| Si | -2.361996817835 | -6.652046649707 | 5.321594318018  |
| TV | 3.448637182648  | 0.000000000001  | 0.000000000001  |
| TV | 1.717039267061  | 7.219372124943  | 0.000000000001  |
| TV | 0.005788448197  | 0.014810910637  | 6.813815894232  |

# EQ-SiO<sub>2</sub> 71

|    |                 |                 |                 |
|----|-----------------|-----------------|-----------------|
| O  | -0.808168713152 | -0.796416882513 | 2.115858526444  |
| O  | -1.873324007462 | -1.746290128059 | -0.219963643956 |
| O  | 0.230576363664  | 0.122275329501  | -0.235778505048 |
| O  | -0.382416878741 | 1.959404053692  | 1.767658682336  |
| O  | 0.794339530077  | -2.215699675041 | 0.654202076659  |
| O  | -2.438738758295 | 0.595504658905  | 0.651221699027  |
| O  | 0.119884832998  | 4.676659495497  | 2.078913702344  |
| O  | -0.982333074849 | 3.774130625331  | -0.275163233985 |
| O  | 1.133330552896  | 5.667974491686  | -0.251529242046 |
| O  | 0.522241354825  | 7.439122227918  | 1.804065437436  |
| O  | 1.663698681718  | 3.279390641335  | 0.517106256135  |
| O  | -1.538490097640 | 6.086822000704  | 0.658173452426  |
| Si | 0.067540525931  | 3.366832399668  | 0.997942620802  |
| Si | 1.626231560539  | -0.810504500905 | 0.199755734335  |
| Si | -0.815540905586 | 0.521587412716  | 1.046127102997  |
| Si | 2.515374980824  | 4.702272296997  | 0.154300886230  |



|    |                 |                 |                 |
|----|-----------------|-----------------|-----------------|
| Si | -0.824554221421 | -2.130739564024 | 1.063480710833  |
| Si | 0.087783756041  | 6.021371244157  | 1.043529261375  |
| TV | 4.895938717909  | -0.000000000033 | 0.000000000044  |
| TV | 1.813520156110  | 10.986309419258 | -0.000000000003 |
| TV | -1.874478010049 | 0.206700636760  | 8.142436257888  |

# EQ-SiO<sub>2</sub> 72

|    |                 |                 |                 |
|----|-----------------|-----------------|-----------------|
| O  | -1.453330194787 | -3.429899298972 | 0.961246607714  |
| O  | -0.567491338512 | -1.339213664880 | 1.591861687008  |
| O  | -2.993221468525 | 0.537498112429  | -0.761792890500 |
| O  | 1.537440683412  | -1.725066288223 | -0.128095661103 |
| O  | -2.884154761153 | 0.420430171058  | 1.592331186856  |
| O  | -0.674634073558 | -1.214762429642 | -0.762390845464 |
| O  | -2.235881651357 | -2.475228533112 | 5.222546114622  |
| O  | -1.349980438275 | -0.384493911195 | 5.853121056014  |
| O  | -3.775793271661 | 1.492149127913  | 3.499542084637  |
| O  | 0.754929242754  | -0.770418535833 | 4.133340261964  |
| O  | -3.666763920681 | 1.375179807424  | 5.853657774028  |
| O  | -1.457237027184 | -0.260049420663 | 3.498887043148  |
| Si | -2.562181893080 | 0.554077539797  | 4.678212058353  |
| Si | -4.383913683507 | 0.078485259430  | 2.546891041615  |
| Si | 0.041955044596  | -2.575530068306 | 0.416238498030  |
| Si | -5.166471438708 | 1.033196622194  | 6.808173379100  |
| Si | -1.779555113552 | -0.400635694076 | 0.416895517222  |
| Si | -0.740644690467 | -1.620775253914 | 4.677554892456  |
| TV | 4.426617480339  | 0.000000000001  | 0.000000000001  |
| TV | -3.643006153347 | 4.350871639955  | -0.000000000000 |
| TV | -1.565105848337 | 1.909373101093  | 8.522625115413  |

# EQ-SiO<sub>2</sub> 73

|    |                 |                 |                 |
|----|-----------------|-----------------|-----------------|
| O  | -2.542150221105 | 0.246994938894  | -2.069827795398 |
| O  | -4.200633829985 | -1.493611320173 | -0.503062023064 |
| O  | -5.048208526885 | -0.194002606976 | 1.638528855712  |
| O  | 0.175714922023  | 0.811300116214  | 0.536635856575  |
| O  | -0.147160442973 | -0.714016653688 | -1.501787994450 |
| O  | -2.251709704935 | 0.382501691553  | 0.392658236476  |
| O  | -3.113373193400 | 3.069925313754  | -2.069759834178 |
| O  | -4.771837757842 | 1.329257031230  | -0.503093893004 |
| O  | -5.619476079753 | 2.628886814792  | 1.638564088407  |
| O  | -0.395472626779 | 3.634299126295  | 0.536604489115  |
| O  | -0.718328077539 | 2.108946813850  | -1.501689181526 |
| O  | -2.822902514905 | 3.205394619863  | 0.392718628901  |
| Si | -6.449793599787 | 3.929928968522  | 0.953333177506  |
| Si | -3.426110221412 | 0.137012978130  | -0.746915439094 |
| Si | -0.980340892817 | 0.587574203700  | -0.837747234726 |
| Si | -3.997321168701 | 2.959913506114  | -0.746839515820 |
| Si | -5.878608768077 | 1.107002022264  | 0.953320811756  |
| Si | -1.551563236666 | 3.410503415086  | -0.837691298505 |
| TV | 7.548992504557  | -0.000000000002 | 0.000000000001  |
| TV | -1.142408020487 | 5.645816682012  | 0.000000000010  |
| TV | -2.917692760476 | -0.337218738680 | 10.770585278127 |

# EQ-SiO<sub>2</sub> 74

|   |                 |                 |                 |
|---|-----------------|-----------------|-----------------|
| O | -3.691425206933 | -0.500491179768 | 1.118369549091  |
| O | -0.315061197681 | -2.397447062621 | 1.863330239723  |
| O | -1.424181232551 | 0.727264100149  | 0.552641597474  |
| O | 2.302381101574  | -0.467904229677 | -1.516161547770 |

|    |                 |                 |                 |
|----|-----------------|-----------------|-----------------|
| O  | -4.769733395557 | 0.519876366149  | 4.278733263469  |
| O  | -0.636080177756 | -3.451514422908 | -1.813892638636 |
| O  | -2.981161630112 | 4.123507871919  | 1.124683296231  |
| O  | 0.393591508457  | 2.225992713750  | 1.863302227685  |
| O  | -0.715446533324 | 5.350901952491  | 0.555843277906  |
| O  | 3.006108754720  | 4.155578363627  | -1.510038704156 |
| O  | -4.062311137280 | 5.144270658873  | 4.278797612121  |
| O  | 0.073758656969  | 1.171432162212  | -1.814613846626 |
| Si | -1.658701013742 | 4.051262808494  | 0.095115614305  |
| Si | -4.415058153840 | -1.228700839618 | 2.419176560589  |
| Si | -1.165518923262 | -2.555190283170 | 0.433317866678  |
| Si | -3.708499708807 | 3.394925378397  | 2.422556160567  |
| Si | -2.366825239815 | -0.572555271392 | 0.091024021799  |
| Si | -0.457168184468 | 2.068036939299  | 0.433281784496  |
| TV | 5.129493653750  | 0.000000000001  | 0.000000000002  |
| TV | 1.415797007113  | 9.247315023976  | -0.000000000004 |
| TV | -0.460626484219 | -1.348607298422 | 4.988526700957  |

# EQ-SiO<sub>2</sub> 75

|    |                 |                 |                 |
|----|-----------------|-----------------|-----------------|
| O  | -6.019259966936 | -4.826533059302 | 3.800924757264  |
| O  | 3.534677336374  | -1.416044991993 | 1.107797887498  |
| O  | -0.743074378556 | 0.627313706209  | 0.214778751088  |
| O  | 0.719379086124  | -0.241926157863 | -2.948083811640 |
| O  | -1.752701210659 | 2.844643867135  | -0.868469075412 |
| O  | -2.427333873133 | -2.221315356847 | 2.308352141003  |
| O  | -6.026485471771 | -5.481611567818 | 8.536839843393  |
| O  | 3.527639795481  | -2.071576956271 | 5.843842054771  |
| O  | -0.750543592438 | -0.028061568433 | 4.950706409860  |
| O  | 0.711907289510  | -0.897425135113 | 1.787429357050  |
| O  | -1.759758319115 | 2.189460239913  | 3.867282077725  |
| O  | -2.434400217423 | -2.876541396756 | 7.044648080324  |
| Si | -1.684201973201 | 0.526709435308  | 3.682435176474  |
| Si | -3.792900815295 | -1.395764123196 | 2.963474320949  |
| Si | -3.577454894920 | -5.031722478805 | 1.625155817902  |
| Si | -3.800050766073 | -2.050820294108 | 7.699391731888  |
| Si | -1.676902042598 | 1.182036923284  | -1.053326428578 |
| Si | -3.584739633347 | -5.687051016560 | 6.361176501357  |
| TV | 5.547185988449  | 0.000000000001  | 0.000000000001  |
| TV | 2.757263961499  | 4.770059736200  | 0.000000000001  |
| TV | -0.014527274395 | -1.310253295646 | 9.471524118356  |

# EQ-SiO<sub>2</sub> 76

|    |                 |                 |                 |
|----|-----------------|-----------------|-----------------|
| O  | -2.880303453238 | -5.481197204960 | 3.870746968975  |
| O  | 0.308262057636  | -1.691190283240 | -1.935967188913 |
| O  | -2.044001915432 | 0.370122934822  | 1.330038545700  |
| O  | 2.531864470773  | -0.770103118216 | -1.153800056807 |
| O  | -1.763049894247 | 2.144143455202  | -0.622675993175 |
| O  | -4.014885363841 | -1.970476740941 | 1.318152971164  |
| O  | -5.933115008165 | -6.044215607258 | 7.848701569151  |
| O  | -2.744355437000 | -2.254134992140 | 2.042080721604  |
| O  | -5.096707392704 | -0.192911121097 | 5.308017545293  |
| O  | -0.520773098326 | -1.332988905370 | 2.824131520166  |
| O  | -4.815731026997 | 1.581175180195  | 3.355375943811  |
| O  | -7.067633421201 | -2.533465689045 | 5.296182238373  |
| Si | -3.973526912497 | 0.804075913122  | 4.560231561254  |
| Si | -5.359669653085 | -2.657121783158 | 2.153647909755  |
| Si | -2.112329298044 | -6.031798221392 | 2.523952000118  |

|    |                 |                 |                |
|----|-----------------|-----------------|----------------|
| Si | -8.412395734351 | -3.220145954344 | 6.131709361040 |
| Si | -0.920834395208 | 1.367098303414  | 0.582201803207 |
| Si | -5.165073274366 | -6.594833848408 | 6.501958569495 |
| TV | 5.620160672329  | 0.000000000001  | 0.000000000001 |
| TV | 0.059704840371  | 5.267574814603  | 0.000000000001 |
| TV | -6.105406065587 | -1.126003101301 | 7.956077353969 |

# EQ-SiO<sub>2</sub> 77

|    |                 |                 |                 |
|----|-----------------|-----------------|-----------------|
| O  | -2.298864718093 | -2.813026045920 | 1.926411214319  |
| O  | 2.663943226749  | -6.490094976257 | 1.755304483562  |
| O  | -1.877814192222 | 2.647069030125  | -0.151260021466 |
| O  | 1.248207187104  | 0.424278032362  | -0.915439996442 |
| O  | -6.069425468889 | 1.543808251187  | 0.789645718128  |
| O  | -1.303664756662 | -1.079111401401 | 0.066162631850  |
| O  | 2.312892334189  | -2.812899697319 | 1.927827298388  |
| O  | 7.282851343727  | -6.486677328851 | 1.756000937372  |
| O  | 2.728422667051  | 2.651424853038  | -0.150286611629 |
| O  | 5.864512693984  | 0.422721762497  | -0.915180812242 |
| O  | -1.448930138924 | 1.540092406996  | 0.787873875217  |
| O  | 3.304957803945  | -1.071721009702 | 0.069416499033  |
| Si | 2.223184859839  | 0.154149242657  | 0.398050032184  |
| Si | -3.629108721555 | -1.833096392973 | 2.258839410854  |
| Si | -0.935982819107 | -2.403140130034 | 1.040132962122  |
| Si | 0.979429806210  | -1.837214857153 | 2.259129833463  |
| Si | -2.380159000438 | 0.150942043476  | 0.396664310363  |
| Si | 3.674146416551  | -2.397294893575 | 1.041172638563  |
| TV | 9.221705982456  | 0.000000000002  | 0.000000000002  |
| TV | -1.314366081419 | 6.230057037881  | 0.000000000000  |
| TV | -0.530220793316 | -2.257307825786 | 4.826149071236  |

# EQ-SiO<sub>2</sub> 78

|    |                 |                 |                 |
|----|-----------------|-----------------|-----------------|
| O  | -2.598153413514 | -3.981398823229 | 3.048410906931  |
| O  | 0.364595514658  | -2.200673806525 | -0.141945464675 |
| O  | -1.808503759289 | 1.432403620563  | 1.387633307685  |
| O  | 2.160873062345  | -1.649676338485 | -1.795817550531 |
| O  | -3.372556148545 | 0.090138144281  | 0.028683417130  |
| O  | -3.174497422599 | -0.848659442149 | 1.209967711173  |
| O  | -5.490121260638 | -3.061333384422 | 6.878662634568  |
| O  | -2.527678379210 | -1.280425837060 | 3.688504232069  |
| O  | -4.700632844532 | 2.352630276452  | 5.217721264895  |
| O  | -0.731286529086 | -0.729372072124 | 2.034250836406  |
| O  | -6.265193468510 | 1.010545088750  | 3.859103066406  |
| O  | -6.066384249127 | 0.071476531252  | 5.039948549437  |
| Si | -4.626323600441 | 2.067138680910  | 3.468466561087  |
| Si | -4.809229272881 | -1.912447452063 | 1.607141687221  |
| Si | -1.160555500572 | -4.784655464192 | 2.537512862664  |
| Si | -7.701149678859 | -0.992230546100 | 5.437530552934  |
| Si | -1.734119024696 | 1.146849464552  | -0.361629510423 |
| Si | -4.052420847566 | -3.864296959650 | 6.367555317123  |
| TV | 5.099121174020  | 0.000000000001  | 0.000000000001  |
| TV | -1.008648593284 | 4.861983605856  | 0.000000000001  |
| TV | -5.784139880493 | 1.840425322498  | 7.660320518975  |

# EQ-SiO<sub>2</sub> 79

|   |                 |                 |                 |
|---|-----------------|-----------------|-----------------|
| O | -2.956080177609 | -2.326204972977 | -0.872645662663 |
| O | -0.695490212415 | -2.096258181079 | 0.588642717809  |
| O | 1.090776825170  | -0.082180379324 | 0.412678528955  |

|    |                 |                 |                 |
|----|-----------------|-----------------|-----------------|
| O  | 2.913111405184  | -2.065792659801 | 0.550490516211  |
| O  | -1.220660988312 | 0.140020874153  | -0.986781372850 |
| O  | -3.741903689953 | -0.537128235998 | 2.613507836054  |
| O  | -3.443116861724 | 2.058007726507  | -0.872274201055 |
| O  | -1.182548151287 | 2.287761356735  | 0.589004570274  |
| O  | 0.603755365798  | 4.301972231628  | 0.413025212494  |
| O  | 2.425840805500  | 2.318255151268  | 0.550780029619  |
| O  | -1.707645381395 | 4.523964944158  | -0.986702180469 |
| O  | -4.229045049779 | 3.846952737201  | 2.613794449962  |
| Si | -2.709490457998 | 5.494193230955  | -0.043170423113 |
| Si | -4.421142733027 | 0.184131355564  | 3.944839459953  |
| Si | -3.239947238868 | -4.764209651605 | 0.961710860660  |
| Si | -4.908163711551 | 4.568186270027  | 3.945178968155  |
| Si | -2.222379029430 | 1.110173675238  | -0.043073913927 |
| Si | -3.727024572136 | -0.380176102854 | 0.961459007634  |
| TV | 6.370927429563  | 0.000000000001  | 0.000000000001  |
| TV | -0.974108069974 | 8.768069729482  | 0.000000000002  |
| TV | -4.367800351185 | 1.107279178584  | 4.377372066243  |

# EQ-SiO<sub>2</sub> 80

|    |                 |                 |                 |
|----|-----------------|-----------------|-----------------|
| O  | -1.325180744480 | -5.946084285143 | 3.446869193057  |
| O  | 0.378075920399  | -3.071552522242 | 3.710430735168  |
| O  | -2.212858730273 | 0.579126354509  | 0.981678169158  |
| O  | 0.964056311927  | 0.357243006429  | -3.368426026180 |
| O  | -2.703483933014 | 2.318105477061  | -1.163540455727 |
| O  | -2.335544366122 | -2.245277229891 | 1.452346785595  |
| O  | 3.140187768116  | -5.949937370521 | 3.450459233890  |
| O  | 4.842107562339  | -3.070566358091 | 3.710907961181  |
| O  | 2.254972996363  | 0.578747517896  | 0.986160231060  |
| O  | 5.430737103202  | 0.355886765416  | -3.365281635561 |
| O  | 1.763488019190  | 2.316096230918  | -1.161702811801 |
| O  | 2.129685757243  | -2.245509993898 | 1.452694497740  |
| Si | 2.975393446146  | 1.669567316053  | -0.061058149556 |
| Si | -3.800347354351 | -2.199102020543 | 0.568987660717  |
| Si | -1.185760968350 | -6.122082095762 | 1.821404028732  |
| Si | 0.665721382614  | -2.198523949295 | 0.567930716806  |
| Si | -1.491227147828 | 1.671183026200  | -0.063541448234 |
| Si | 3.280843193320  | -6.123703412091 | 1.824712088301  |
| TV | 8.932054089822  | -0.000000000002 | 0.000000000016  |
| TV | -0.452743203929 | 5.390570983160  | -0.000000000000 |
| TV | -1.027678262115 | -1.249284742357 | 4.675836700789  |

# EQ-SiO<sub>2</sub> 81

|    |                 |                 |                 |
|----|-----------------|-----------------|-----------------|
| O  | -2.288361848908 | -2.519458150758 | 2.162123840080  |
| O  | 3.750902713448  | -5.529260358443 | 1.463537628774  |
| O  | -2.292981213786 | 1.627585025743  | 0.302436305611  |
| O  | 1.557021958707  | 0.047309679918  | -1.215455521016 |
| O  | -6.206237841347 | 1.643300187017  | 0.910794207691  |
| O  | -1.454091044089 | -1.026559168217 | 0.038254560880  |
| O  | 3.025853930185  | -2.519067953140 | 2.162009015772  |
| O  | 9.065285177658  | -5.529458058514 | 1.463786001558  |
| O  | 3.022298586007  | 1.628137632000  | 0.301323235633  |
| O  | 6.871575938508  | 0.046919369943  | -1.215683379703 |
| O  | -0.892165401577 | 1.642804023898  | 0.912079625984  |
| O  | 3.860572377272  | -1.026160288141 | 0.038488182322  |
| Si | 2.510240312715  | -0.065510186216 | 0.120105651502  |
| Si | -3.979538636512 | -2.035294168867 | 2.039724238590  |

|    |                 |                 |                 |
|----|-----------------|-----------------|-----------------|
| Si | -0.951679375992 | -1.987101777146 | 1.348497669005  |
| Si | 1.334455270661  | -2.034938590522 | 2.039766775662  |
| Si | -2.804750993975 | -0.066176059319 | 0.120043717544  |
| Si | 4.362926338019  | -1.986862270101 | 1.348632647764  |
| TV | 10.629069540563 | 0.000000000000  | 0.000000000002  |
| TV | -2.121908911915 | 5.097529941316  | -0.000000000001 |
| TV | -0.538138272527 | -2.197363242596 | 4.930912818159  |

# EQ-SiO<sub>2</sub> 82

|    |                 |                 |                 |
|----|-----------------|-----------------|-----------------|
| O  | -7.754389355259 | -9.455698551265 | 3.250150301590  |
| O  | -1.277766985772 | -2.562517885913 | 1.067255029862  |
| O  | -1.091624354452 | 1.949779056513  | 0.623357780756  |
| O  | 4.876550987300  | 5.935472846128  | -3.076082428775 |
| O  | 0.097110719357  | 3.473752580400  | -1.489044673471 |
| O  | -2.983384688467 | -3.462484111130 | 3.017620199033  |
| O  | -2.408621476441 | -9.464643862438 | 3.273674019125  |
| O  | 4.022966224878  | -2.689395532691 | 1.037773479403  |
| O  | 4.198058743803  | 1.816627478953  | 0.634029135945  |
| O  | 10.199648386358 | 5.889775143258  | -3.112696902748 |
| O  | 5.317182157809  | 3.440245894888  | -1.465500412739 |
| O  | 2.356114067308  | -3.538125601540 | 3.018426555384  |
| Si | 5.485649501921  | 2.385968357859  | -0.209363963400 |
| Si | -4.327485740465 | -3.949254729284 | 2.077619962482  |
| Si | -3.827035683523 | -8.744983514048 | 2.876423848852  |
| Si | 0.987680734259  | -3.999387240503 | 2.101964992208  |
| Si | 0.230666013556  | 2.472257257166  | -0.188211032210 |
| Si | 1.499556740738  | -8.803221121563 | 2.846801405657  |
| TV | 10.702393066011 | 0.000000000002  | 0.000000000000  |
| TV | 2.251068931664  | 6.132931199128  | 0.000000000007  |
| TV | -2.481635923197 | -2.947583421952 | 3.812618970742  |

# EQ-SiO<sub>2</sub> 83

|    |                 |                 |                 |
|----|-----------------|-----------------|-----------------|
| O  | -1.160053743288 | 2.380364262546  | 2.032117799387  |
| O  | -3.937888403121 | -0.629560437179 | 3.139101258612  |
| O  | -0.825744989658 | -2.437905199161 | 1.918875692659  |
| O  | -3.610468061574 | 0.838187283552  | 3.167884704039  |
| O  | -0.034040234559 | 0.292675569470  | 0.791343234981  |
| O  | 1.171169577088  | -2.224930804434 | 0.620427603329  |
| O  | 3.353178875579  | 2.380366662204  | 2.032062218551  |
| O  | 0.575546846785  | -0.629496521954 | 3.139168546355  |
| O  | 3.687421279487  | -2.437875509470 | 1.918758666151  |
| O  | 0.902820408013  | 0.838284976137  | 3.167937565487  |
| O  | 4.479230540673  | 0.292687245594  | 0.791243929104  |
| O  | 5.684462468753  | -2.224898497879 | 0.620452538193  |
| Si | 4.731558568305  | -1.171930041181 | 1.519599255505  |
| Si | 0.214920837458  | -3.650030282922 | 1.166347404726  |
| Si | 0.325295433314  | 1.738785721941  | 1.592430483807  |
| Si | 4.728169250665  | -3.650001093256 | 1.166303393360  |
| Si | 0.218374447821  | -1.171948457636 | 1.519688227992  |
| Si | 4.838542063364  | 1.738745155536  | 1.592455025827  |
| TV | 9.026464715421  | -0.000000000000 | 0.000000000000  |
| TV | -2.548113070526 | 6.907654110285  | -0.000000000000 |
| TV | -1.624812858887 | -1.844736942262 | 3.797909164639  |

# EQ-SiO<sub>2</sub> 84

|   |                 |                 |                 |
|---|-----------------|-----------------|-----------------|
| O | -3.236673324871 | -8.021964791061 | 2.965945900215  |
| O | -0.035544435312 | -3.471315428582 | -0.456083589178 |

|    |                 |                  |                 |
|----|-----------------|------------------|-----------------|
| O  | -2.006346820477 | 4.958524427188   | 0.480259423487  |
| O  | 1.376400375228  | -0.972879520192  | -0.261232898509 |
| O  | -3.494086632714 | 3.330484278965   | -0.754278969936 |
| O  | -3.725951847985 | -2.458239744561  | 1.630243254323  |
| O  | -4.670919084585 | -10.580736979758 | 6.201333228025  |
| O  | -1.456420547895 | -5.949714047749  | 2.770360180472  |
| O  | -3.412365715042 | 2.557355970070   | 3.584085578594  |
| O  | -0.004664681037 | -3.468582528499  | 2.929312440624  |
| O  | -4.882684526263 | 0.912908142635   | 2.348268402032  |
| O  | -5.227750046170 | -5.036808805823  | 4.878916378065  |
| Si | -3.785543356355 | -0.015060407745  | 3.283092568640  |
| Si | -4.133728660443 | -3.763365320934  | 2.747344626656  |
| Si | -0.625913421596 | -10.610293173456 | 2.509838031599  |
| Si | -5.683237818423 | -6.330085254744  | 6.001104451480  |
| Si | -2.329869542681 | 2.424541760214   | 0.125169022040  |
| Si | -2.172079421628 | -13.101519132587 | 5.674863849076  |
| TV | 5.761268546585  | 0.000000000001   | 0.000000000001  |
| TV | -0.768285292134 | 6.339440348151   | 0.000000000001  |
| TV | -2.928819210648 | -4.979826198276  | 6.333822463761  |

# EQ-SiO<sub>2</sub> 85

|    |                 |                 |                 |
|----|-----------------|-----------------|-----------------|
| O  | -2.033438334625 | 0.018444850993  | 0.212224084541  |
| O  | -1.136865362634 | -0.174854066256 | 2.949993694578  |
| O  | -0.091763282259 | -1.230921401265 | -2.177223497444 |
| O  | 0.250166954392  | 0.055582845570  | -1.408302879374 |
| O  | -2.320731637126 | -2.063212952787 | 1.408667430631  |
| O  | 0.443101302773  | -1.080064548110 | 1.084544543140  |
| O  | -3.406481304183 | 3.719823573403  | 0.197639038563  |
| O  | -2.514429581362 | 3.568721292652  | 2.947937608720  |
| O  | -1.473513762918 | 2.487473423820  | -2.170073874024 |
| O  | -1.107368262753 | 3.776594639198  | -1.416728991273 |
| O  | -3.709718156793 | 1.666796918918  | 1.439607814534  |
| O  | -0.942042154142 | 2.629325246093  | 1.084646626454  |
| Si | 0.509972032040  | 2.516107871953  | 0.265226669103  |
| Si | 1.466463778703  | -1.986924356230 | -1.915913252154 |
| Si | 4.022128968765  | -0.826814484337 | 1.410386673109  |
| Si | 0.074677052270  | 1.711706407520  | -1.906486988560 |
| Si | 1.890942290718  | -1.193456128599 | 0.257150906284  |
| Si | 2.641242814607  | 2.895764276683  | 1.415147541586  |
| TV | 5.165480329599  | -0.000000000000 | -0.000000000001 |
| TV | -2.772032277072 | 7.416848542903  | 0.000000000006  |
| TV | -2.178739674709 | -2.282399490620 | 6.153017346668  |

# EQ-SiO<sub>2</sub> 86

|    |                 |                 |                 |
|----|-----------------|-----------------|-----------------|
| O  | -3.445460658137 | -5.891916385814 | 3.811334565315  |
| O  | 0.406939482007  | -3.560007893470 | -1.144274833028 |
| O  | -0.744049297474 | 3.048151496975  | 0.342444528820  |
| O  | 1.743303876970  | -1.158954767514 | -1.502642848638 |
| O  | -1.154261377210 | 2.447372610057  | -1.951537574155 |
| O  | -3.980133473709 | -0.394011284823 | 3.645360799092  |
| O  | -5.664804607332 | -6.225977702656 | 7.771855379735  |
| O  | -1.812527409231 | -3.894092191004 | 2.816195257811  |
| O  | -2.963508268587 | 2.714279637531  | 4.302902784777  |
| O  | -0.476324769304 | -1.492928746570 | 2.457757923795  |
| O  | -3.373792417370 | 2.113353646426  | 2.009002257099  |
| O  | -6.199473761547 | -0.728009440898 | 7.605840360936  |
| Si | -2.438047714795 | 1.411895962745  | 3.191124066371  |

|    |                 |                 |                 |
|----|-----------------|-----------------|-----------------|
| Si | -4.140606901031 | -1.937670064601 | 2.727710313454  |
| Si | -2.800016504843 | -8.092744683280 | 2.063754843111  |
| Si | -6.359893047805 | -2.271615968766 | 6.688144091623  |
| Si | -0.218570741558 | 1.745798842394  | -0.769424287392 |
| Si | -5.019304135381 | -8.426588132945 | 6.024233953527  |
| TV | 5.266825102201  | 0.000000000001  | 0.000000000001  |
| TV | 0.945600942463  | 5.742260970340  | -0.000000000000 |
| TV | -4.438867912768 | -0.667917179511 | 7.920934133214  |

# EQ-SiO<sub>2</sub> 87

|    |                 |                 |                 |
|----|-----------------|-----------------|-----------------|
| O  | -1.415915801322 | -0.540569417148 | 0.732213013429  |
| O  | -1.763430776648 | 4.115655570748  | -0.712657098453 |
| O  | -3.889149973699 | -0.991471492034 | 1.774741743420  |
| O  | -1.731691655378 | 2.657824303244  | -1.165872139777 |
| O  | -3.980633412710 | 3.327694455680  | 0.737176610367  |
| O  | -4.309589642435 | 7.966815644690  | -0.701607499610 |
| O  | -6.456725254267 | 2.865817164187  | 1.749998654425  |
| O  | -4.313637829425 | 6.512974657675  | -1.162182897843 |
| O  | -6.523785565887 | 7.197615833997  | 0.764089845400  |
| O  | -6.841541432408 | 11.824196566366 | -0.699983298064 |
| O  | -8.990826303918 | 6.757060831474  | 1.786646902385  |
| O  | -6.848824054008 | 10.365512144125 | -1.149185524603 |
| Si | -7.439705522782 | 6.146689521432  | 1.685937459620  |
| Si | -2.434904730150 | 3.943093852600  | 0.862126307627  |
| Si | -4.976703656598 | 7.810727188860  | 0.877587265540  |
| Si | -2.329807333973 | -1.582773333637 | 1.670123826253  |
| Si | -4.894321915553 | 2.280480887236  | 1.667870893943  |
| Si | 0.131109911893  | 0.069996363285  | 0.868037374992  |
| TV | 4.946131081828  | -0.000000000000 | -0.000000000000 |
| TV | -7.666651812151 | 11.605431971483 | 0.000000000000  |
| TV | 0.075220385644  | -4.346396559241 | 4.413176510536  |

# EQ-SiO<sub>2</sub> 88

|    |                 |                 |                 |
|----|-----------------|-----------------|-----------------|
| O  | 0.353778930003  | 2.454744630526  | -0.043476574722 |
| O  | -0.776185172011 | -3.424312881862 | -2.022913947610 |
| O  | 2.145380915668  | 2.419038259213  | 1.967192490397  |
| O  | -2.277649357417 | -0.361271596669 | 0.674245109807  |
| O  | 4.994536381151  | 2.454698716068  | -0.043403883984 |
| O  | 3.864601425096  | -3.424291496720 | -2.022892056246 |
| O  | 6.786139421394  | 2.419063742273  | 1.967240359193  |
| O  | 2.363099395009  | -0.361280839863 | 0.674234663529  |
| O  | 9.635312845963  | 2.454729636264  | -0.043433667461 |
| O  | 8.505340228253  | -3.424277118731 | -2.022902740445 |
| O  | 11.426890753577 | 2.419117037252  | 1.967174678340  |
| O  | 7.003848319915  | -0.361225750167 | 0.674200155947  |
| Si | 11.069128873641 | 3.134417896596  | 0.497799929361  |
| Si | -0.262791107688 | -2.223094461846 | -0.914490009835 |
| Si | 4.377946275918  | -2.223100265690 | -0.914447431041 |
| Si | 1.787594877534  | 3.134370788497  | 0.497840846746  |
| Si | 6.428354832761  | 3.134350692032  | 0.497881269449  |
| Si | -4.903549103147 | -2.223036638906 | -0.914550818140 |
| TV | 13.922265191521 | 0.000000000075  | 0.000000000168  |
| TV | 3.927143997668  | 5.196213359503  | 0.000000000092  |
| TV | -1.961758587678 | -1.970337145082 | 3.654598468269  |

# EQ-SiO<sub>2</sub> 89

|   |                 |                |                |
|---|-----------------|----------------|----------------|
| O | -2.493483888296 | 2.022971061130 | 0.440035038971 |
|---|-----------------|----------------|----------------|

|    |                 |                 |                 |
|----|-----------------|-----------------|-----------------|
| O  | 2.220138088039  | -0.480461712039 | -1.673986471596 |
| O  | -0.605719235467 | 0.285710335427  | 1.239928087160  |
| O  | -1.029587967520 | -0.691924984602 | -1.312350044808 |
| O  | -3.102718177574 | 0.875193349760  | 4.901596856462  |
| O  | 1.611028801635  | -1.628079279443 | 2.787425962080  |
| O  | -1.215086821377 | -0.862074884902 | 5.701471414374  |
| O  | -1.638749916809 | -1.839873537844 | 3.149133172404  |
| O  | -3.711996599814 | -0.272578696687 | 9.363085802494  |
| O  | 1.001717274791  | -2.775901185347 | 7.248887525501  |
| O  | -1.824225270445 | -2.009668346044 | 10.162686699405 |
| O  | -2.248053114008 | -2.987686027065 | 7.610514750285  |
| Si | -2.222037081119 | -0.388292990041 | 10.099484340606 |
| Si | -1.611788139630 | -2.239903436917 | 4.835498677391  |
| Si | -2.220994501116 | -3.387539651160 | 9.296905244474  |
| Si | -1.003611217017 | 1.907086339195  | 1.176621274355  |
| Si | -1.612832403579 | 0.759325280609  | 5.638115055864  |
| Si | -1.002550015800 | -1.092117529230 | 0.374001960632  |
| TV | 4.710999177497  | 0.000000000011  | 0.000000000010  |
| TV | -2.821022275720 | 4.131941623652  | 0.000000000061  |
| TV | -1.827528999581 | -3.443153053997 | 13.384296845748 |

#### # EQ-SiO<sub>2</sub> 90

|    |                 |                 |                 |
|----|-----------------|-----------------|-----------------|
| O  | -1.331224297832 | 2.491338542219  | 0.297436657007  |
| O  | 2.195233919263  | -0.954431466758 | -0.513051744789 |
| O  | -0.258652327724 | 0.082810963328  | 0.813899295694  |
| O  | -2.683292828071 | 0.052010057192  | -1.605370380028 |
| O  | 3.315968846447  | 2.507628576881  | 0.296641110247  |
| O  | 6.782667459400  | -0.999706731086 | -0.516316343055 |
| O  | 4.396620087335  | 0.094912121599  | 0.804958134473  |
| O  | 1.969541359256  | 0.107039626238  | -1.584189387052 |
| O  | 7.861582565429  | 2.407950711926  | 0.289647040600  |
| O  | 11.403407772296 | -0.996869976821 | -0.527032246430 |
| O  | 8.971339549763  | 0.005655812381  | 0.810230700833  |
| O  | 6.610452652782  | 0.088759633370  | -1.572095648471 |
| Si | 8.448722312122  | 1.428870537260  | 1.496446244931  |
| Si | 3.920061518524  | -1.023512697473 | -0.344525479882 |
| Si | 8.503069108770  | -1.114146472544 | -0.340116923717 |
| Si | -0.759086133223 | 1.510214647148  | 1.508183336906  |
| Si | 3.878216069794  | 1.514980485602  | 1.500245193592  |
| Si | -0.722487259758 | -1.036906883477 | -0.339691187254 |
| TV | 13.848113827376 | 0.000000000033  | 0.000000000030  |
| TV | -0.772488842630 | 5.059830038722  | 0.000000000076  |
| TV | -0.570062099844 | -2.857802821568 | 3.760755886609  |

#### # EQ-SiO<sub>2</sub> 91

|   |                 |                 |                 |
|---|-----------------|-----------------|-----------------|
| O | -0.026981111990 | 0.542945506209  | 1.092748008890  |
| O | -0.860391889491 | -0.699895130291 | 0.775337815381  |
| O | 0.601919558678  | -0.167752560041 | -1.230035598203 |
| O | 0.789925121206  | -2.746793646568 | -0.772619673705 |
| O | 4.557540130687  | 0.543010593121  | 1.092746353968  |
| O | 3.724160875439  | -0.699779203319 | 0.775391290836  |
| O | 5.186597313969  | -0.167751468762 | -1.230050676734 |
| O | 5.374598303331  | -2.746723645854 | -0.772589063719 |
| O | 9.142423039177  | 0.542901777841  | 1.092709254860  |
| O | 8.309162840238  | -0.699993967377 | 0.775348345697  |
| O | 9.771589021030  | -0.167952212144 | -1.230030271782 |
| O | 9.959384635446  | -2.747015679793 | -0.772779250213 |



|    |                 |                 |                 |
|----|-----------------|-----------------|-----------------|
| Si | 11.235317940405 | 2.952596166111  | -0.755862876998 |
| Si | 4.832344661530  | 1.364752417685  | -0.638940887446 |
| Si | 9.417190690912  | 1.364565187631  | -0.638974799976 |
| Si | 2.065830480365  | 2.952642095493  | -0.755805618589 |
| Si | 6.650723973265  | 2.952494289044  | -0.755872921837 |
| Si | 0.247686706400  | 1.364709006711  | -0.638847715488 |
| TV | 13.754150486225 | -0.000000000000 | -0.000000000000 |
| TV | -2.175480928740 | 4.471001772657  | -0.000000000000 |
| TV | -1.298988261656 | -2.691300123452 | 3.525693317715  |

# EQ-SiO<sub>2</sub> 92

|    |                 |                 |                 |
|----|-----------------|-----------------|-----------------|
| O  | -2.884933996899 | 2.225954369185  | 0.429787904321  |
| O  | 2.426218409258  | -0.082906103250 | -2.539305729036 |
| O  | -1.889507347511 | -0.377767104878 | 0.292468601986  |
| O  | 0.497036411086  | 0.278987003786  | 0.987744704869  |
| O  | -2.172113675459 | -0.477303191968 | 3.946784924793  |
| O  | 3.139000860872  | -2.786162999909 | 0.977683836419  |
| O  | -1.176690556463 | -3.081037272985 | 3.809453492789  |
| O  | 1.209844692680  | -2.424274927240 | 4.504740319856  |
| O  | -1.459290853462 | -3.180513211176 | 7.463775093094  |
| O  | 3.851823496279  | -5.489445890086 | 4.494673388274  |
| O  | -0.463889155552 | -5.784296407490 | 7.326432837862  |
| O  | 1.922650932362  | -5.127520284917 | 8.021719695883  |
| Si | -0.252176974888 | -4.159211523644 | 6.920250749026  |
| Si | 0.104499077692  | -3.823786478116 | 4.635454826279  |
| Si | 0.817302509152  | -6.527037477304 | 8.152451221876  |
| Si | -1.677788395460 | 1.247303038837  | -0.113728204459 |
| Si | -0.964965775772 | -1.455953641840 | 3.403259109319  |
| Si | -0.608315064595 | -1.120526655518 | 1.118465935129  |
| TV | 5.133234219855  | 0.000000000012  | 0.000000000010  |
| TV | -3.429351246193 | 4.339621989670  | 0.000000000059  |
| TV | 2.138401129508  | -8.109794829637 | 10.550964712253 |

# EQ-SiO<sub>2</sub> 93

|    |                 |                 |                 |
|----|-----------------|-----------------|-----------------|
| O  | -3.314520295197 | 3.663013157097  | 1.352937146945  |
| O  | 4.010692208022  | -2.144707047978 | -0.968166548141 |
| O  | -2.362675726709 | 0.748307403740  | 1.135519767721  |
| O  | 2.289851724998  | -3.854220782328 | -3.999846267795 |
| O  | -4.973030754338 | 2.835912687122  | 5.377985051923  |
| O  | 2.334678204676  | -2.985941977899 | 3.082204566141  |
| O  | -4.026704909141 | -0.083152543496 | 5.172410017739  |
| O  | 0.625945248651  | -4.674146029911 | 0.028002586368  |
| O  | -6.635313928488 | 2.004768314569  | 9.413322627444  |
| O  | 0.686315305155  | -3.807883839762 | 7.102040325250  |
| O  | -5.682301427601 | -0.908324288913 | 9.191139471097  |
| O  | -1.040903349653 | -5.506501670111 | 4.066959570239  |
| Si | -7.728395092684 | 2.790494567899  | 10.428232762733 |
| Si | -2.424786984245 | -1.486934986402 | 3.778296100380  |
| Si | -4.075231547542 | -2.314152301894 | 7.808479238195  |
| Si | -4.414512912952 | 4.436486163373  | 2.371226204309  |
| Si | -6.066448498256 | 3.610820660903  | 6.401650401909  |
| Si | -0.755793483912 | -0.654452982444 | -0.251577964737 |
| TV | 4.692702344290  | 0.000000000010  | 0.000000000012  |
| TV | -3.080051841432 | 4.399228317959  | 0.000000000065  |
| TV | -4.982826847518 | -2.478505765837 | 12.085873993030 |

# EQ-SiO<sub>2</sub> 94

|    |                 |                 |                 |
|----|-----------------|-----------------|-----------------|
| O  | -4.864628366434 | 5.223900708300  | 1.992476737877  |
| O  | 4.276625758094  | -2.018572014727 | -1.153820258585 |
| O  | -2.217813174970 | -0.143478621342 | 0.700499933497  |
| O  | 5.891721345586  | -5.942237699014 | -4.063353329133 |
| O  | -1.180478455036 | 5.223899262840  | 1.992475030667  |
| O  | 7.960717935380  | -2.018508169517 | -1.153921822022 |
| O  | 1.466330553099  | -0.143473259263 | 0.700496459846  |
| O  | 9.575758935807  | -5.942140075400 | -4.063503011950 |
| O  | 2.503654490295  | 5.223909346894  | 1.992468792258  |
| O  | 11.644810269299 | -2.018525335895 | -1.153921032355 |
| O  | 5.150474147182  | -0.143503635238 | 0.700498906202  |
| O  | 13.260006725121 | -5.942181392937 | -4.063415851409 |
| Si | 0.672044316754  | 5.285356026097  | 2.393878649670  |
| Si | 3.299618483299  | -0.203508494556 | 0.298981790255  |
| Si | 6.983769127596  | -0.203515229864 | 0.298988315801  |
| Si | -6.696234746391 | 5.285343335350  | 2.393889958430  |
| Si | -3.012091053011 | 5.285377005064  | 2.393878132433  |
| Si | -0.384521512445 | -0.203553271707 | 0.298991815568  |
| TV | 11.052430642058 | 0.000000000027  | 0.000000000036  |
| TV | -4.489528880000 | 4.903600151774  | 0.000000000068  |
| TV | -1.891182943926 | -0.833654163563 | 3.953494776847  |

# EQ-SiO<sub>2</sub> 95

|    |                 |                 |                 |
|----|-----------------|-----------------|-----------------|
| O  | -2.747875877785 | 1.916569432001  | 2.135696430738  |
| O  | -0.697676602410 | 1.066061520111  | -2.083160874529 |
| O  | -1.107513390771 | -0.765248362812 | -0.004195504793 |
| O  | 0.897403769055  | 0.367182749699  | 0.060842228555  |
| O  | 1.916805139017  | 1.916569388206  | 2.135703800783  |
| O  | 3.966988026924  | 1.065997076092  | -2.083152505094 |
| O  | 3.557185143560  | -0.765208914677 | -0.004165674524 |
| O  | 5.562061445859  | 0.367214040123  | 0.060797131134  |
| O  | 6.581417907107  | 1.916453998081  | 2.135808682457  |
| O  | 8.631684977772  | 1.066009403861  | -2.083076508085 |
| O  | 8.221856703411  | -0.765178902846 | -0.004196080976 |
| O  | 10.226730360520 | 0.367220922960  | 0.060949562190  |
| Si | 8.630624025021  | 1.045579944409  | -0.348146699989 |
| Si | 5.153741028724  | -1.444426104724 | 0.401764140593  |
| Si | 9.818365152796  | -1.444450777937 | 0.401803601815  |
| Si | -0.698692908806 | 1.045555566813  | -0.348200214731 |
| Si | 3.965956518720  | 1.045502988610  | -0.348232190648 |
| Si | 0.489052212187  | -1.444498953631 | 0.401723206666  |
| TV | 13.994086049971 | 0.000000000039  | 0.000000000036  |
| TV | -3.238718197842 | 3.356822762124  | 0.000000000039  |
| TV | 2.588599516667  | -3.007570431079 | 4.530053755023  |

# EQ-SiO<sub>2</sub> 96

|   |                 |                 |                 |
|---|-----------------|-----------------|-----------------|
| O | -2.665674608119 | -0.067089278375 | 2.708500052279  |
| O | 13.581154167136 | 0.372341331921  | -7.066738222785 |
| O | -4.346936472530 | 1.231462614757  | 1.834332572524  |
| O | -3.322363879530 | -0.289104558259 | -1.881700520292 |
| O | -3.953966455908 | 3.317856139653  | 2.708484908791  |
| O | 12.292892235764 | 3.757272113770  | -7.066757427456 |
| O | -5.635201013038 | 4.616417792639  | 1.834288530845  |
| O | -4.610621234923 | 3.095865364994  | -1.881726483847 |
| O | -5.242258030027 | 6.702792046495  | 2.708489991486  |
| O | 11.004601301913 | 7.142261837952  | -7.066746711100 |
| O | -6.923440336329 | 8.001404252696  | 1.834313933384  |

|    |                 |                 |                 |
|----|-----------------|-----------------|-----------------|
| O  | -5.898903143987 | 6.480853798074  | -1.881717885743 |
| Si | -5.709765116581 | 8.457279485078  | 3.100506895063  |
| Si | -5.130564640618 | 2.866365130859  | 1.473536619215  |
| Si | -6.418839321895 | 6.251339785655  | 1.473513968687  |
| Si | -3.133213227616 | 1.687358499488  | 3.100499532092  |
| Si | -4.421498753803 | 5.072323136669  | 3.100464948793  |
| Si | -3.842288297945 | -0.518580262795 | 1.473566969634  |
| TV | 5.071191206311  | -0.000000000011 | 0.000000000006  |
| TV | -3.864845560596 | 10.154875939827 | 0.000000000137  |
| TV | -2.207671988797 | -0.856982907944 | 3.777268150681  |

# EQ-SiO<sub>2</sub> 97

|    |                 |                 |                 |
|----|-----------------|-----------------|-----------------|
| O  | -3.320685649391 | 0.465887827980  | 0.174293878388  |
| O  | 3.168756879961  | -1.845093230159 | -0.229538992196 |
| O  | 0.397461117491  | 2.544378923239  | 1.402695787577  |
| O  | -1.099850380005 | 0.369396625615  | -1.380600669166 |
| O  | -2.328669216500 | 3.636074898945  | 0.174267433988  |
| O  | 4.160795373720  | 1.325058362996  | -0.229588836058 |
| O  | 1.389534299469  | 5.714539171114  | 1.402701850851  |
| O  | -0.107752961674 | 3.539513909017  | -1.380557672051 |
| O  | -1.336574678528 | 6.806208123805  | 0.174318188018  |
| O  | 5.152884235693  | 4.495203406765  | -0.229608276196 |
| O  | 2.381584860506  | 8.884688498539  | 1.402705483016  |
| O  | 0.884290504796  | 6.709717494182  | -1.380543080576 |
| Si | 2.368001733729  | 7.129212634940  | 1.202383119877  |
| Si | -1.619883681819 | 2.731377017430  | -1.010764543388 |
| Si | -0.627831864058 | 5.901555123687  | -1.010761506353 |
| Si | 0.383921884657  | 0.788876265234  | 1.202325660193  |
| Si | 1.375970307768  | 3.959036412522  | 1.202327333557  |
| Si | -2.611925219160 | -0.438816439402 | -1.010756785148 |
| TV | 5.005466532285  | 0.000000000010  | 0.000000000009  |
| TV | 2.976146918894  | 9.510480066420  | 0.000000000150  |
| TV | -1.923116998912 | -1.896487344699 | 4.310578268637  |

# EQ-SiO<sub>2</sub> 98

|    |                 |                 |                 |
|----|-----------------|-----------------|-----------------|
| O  | 0.229151869787  | 1.703721843330  | -0.418307716947 |
| O  | 0.496544906813  | -1.251244020688 | -1.257078985173 |
| O  | -1.000114832581 | -2.451011285261 | 0.558122584907  |
| O  | -1.833024763592 | -1.358330859839 | -0.076336662896 |
| O  | 0.329384470475  | 2.317145854147  | 2.380497789675  |
| O  | 0.596852992774  | -0.637797703942 | 1.541840638951  |
| O  | -0.899815249614 | -1.837650790620 | 3.356939772281  |
| O  | -1.732720955604 | -0.744876878348 | 2.722606783982  |
| O  | 0.429830860005  | 2.930510780845  | 5.179249873341  |
| O  | 0.697257544436  | -0.024352301590 | 4.340561679501  |
| O  | -0.799462855800 | -1.224225762474 | 6.155807234050  |
| O  | -1.632391248560 | -0.131499086381 | 5.521494509739  |
| Si | -3.371370930177 | -0.484209345084 | 5.896168551015  |
| Si | 0.176155336946  | 3.501571394584  | 3.596405801025  |
| Si | 0.276450568926  | 4.114961013446  | 6.395215755253  |
| Si | -3.572006812032 | -1.711056659560 | 0.298516574409  |
| Si | -3.471622484641 | -1.097650728568 | 3.097359386105  |
| Si | 0.075839023522  | 2.888183301652  | 0.797563930179  |
| TV | 4.530322340753  | -0.000000000000 | 0.000000000000  |
| TV | -2.145431289236 | 6.526738660649  | -0.000000000000 |
| TV | 0.300965764209  | 1.840222566264  | 8.396462080822  |

# EQ-SiO<sub>2</sub> 99

|    |                 |                  |                 |
|----|-----------------|------------------|-----------------|
| O  | -1.984103342909 | -0.935195219606  | 0.154101685172  |
| O  | -1.118107395803 | -0.233756994618  | -0.821151484226 |
| O  | 0.170833765514  | 1.939582901739   | 0.347527376768  |
| O  | 5.335508717249  | 1.897885629488   | 0.201722824847  |
| O  | -2.772416762472 | -4.387831584329  | 2.306224710475  |
| O  | -1.906384158540 | -3.686423637359  | 1.330991208452  |
| O  | -0.617452125255 | -1.513072925801  | 2.499701292520  |
| O  | 4.547239408457  | -1.554764249379  | 2.353873907607  |
| O  | -3.560741036928 | -7.840532043408  | 4.458277898283  |
| O  | -2.694721396339 | -7.139030321880  | 3.483089366779  |
| O  | -1.405766039709 | -4.965727704960  | 4.651794218886  |
| O  | 3.758915760328  | -5.007336341998  | 4.505992399994  |
| Si | -7.881621215500 | -8.574646402973  | 4.045794506377  |
| Si | -0.327988060981 | -3.003018398990  | 1.717869283145  |
| Si | -1.116302406119 | -6.455682966524  | 3.869995893295  |
| Si | -6.305043334659 | -1.669394745996  | -0.258510991368 |
| Si | -7.093331489024 | -5.122009390392  | 1.893681616231  |
| Si | 0.460313260728  | 0.449622906668   | -0.434271267934 |
| TV | 7.823630090966  | 0.000000000104   | -0.000000000105 |
| TV | -2.690613744527 | 4.472955160119   | 0.000000000019  |
| TV | -2.364971751699 | -10.357923630923 | 6.456361421105  |

# EQ-SiO<sub>2</sub> 100

|    |                 |                 |                 |
|----|-----------------|-----------------|-----------------|
| O  | -2.198656003003 | 3.867626918248  | 1.787492409674  |
| O  | 5.286962239668  | -4.173437735807 | -4.472862193649 |
| O  | -1.069822624555 | 1.869031505891  | 2.359963756430  |
| O  | 0.589560127978  | -2.379149173377 | -0.197703995905 |
| O  | 0.718590462283  | 3.868454142819  | 1.792144762674  |
| O  | 8.155672689036  | -4.183239587287 | -4.490611697707 |
| O  | 1.827154136280  | 1.871357148280  | 2.372363837918  |
| O  | 3.509198545408  | -2.374503494782 | -0.185703439487 |
| O  | 3.603905924342  | 3.873432486783  | 1.813591246908  |
| O  | 11.069991757472 | -4.180584540446 | -4.483057357316 |
| O  | 4.725653645562  | 1.869328498642  | 2.377331840322  |
| O  | 6.371514139862  | -2.381403851577 | -0.199693690443 |
| Si | 3.273493817258  | 2.168530969892  | 1.519883536579  |
| Si | 0.643521163062  | 0.649623346139  | -0.847188217809 |
| Si | 3.561542253619  | 0.654387073062  | -0.834612808597 |
| Si | -2.527789218776 | 2.161445016066  | 1.507027317203  |
| Si | 0.376081415925  | 2.164274054635  | 1.508733532205  |
| Si | -2.248898901167 | 0.653467571948  | -0.851800465418 |
| TV | 8.692854674334  | 0.000000000030  | 0.000000000028  |
| TV | -0.334960382010 | 4.613247252367  | 0.000000000064  |
| TV | -1.651032107514 | -0.194957567147 | 5.424423106105  |

# EQ-SiO<sub>2</sub> 101

|   |                |                 |                 |
|---|----------------|-----------------|-----------------|
| O | 0.090265527517 | -0.904721680553 | 1.978501287153  |
| O | 0.118067979001 | 1.827801671625  | 1.594548835267  |
| O | 2.640371387521 | 0.281372603485  | -0.840655575044 |
| O | 1.817696067487 | -2.345679328254 | 0.351131772311  |
| O | 1.481662869867 | 3.337601227593  | -0.859312350695 |
| O | 2.831537916833 | 0.314118902129  | 0.660588210520  |
| O | 4.799012259180 | -0.904720445247 | 1.978528122980  |
| O | 4.826869100250 | 1.827816059356  | 1.594615157655  |
| O | 7.349198462576 | 0.281361072688  | -0.840664304172 |
| O | 6.526519953857 | -2.345656281727 | 0.351171630037  |

|    |                 |                 |                 |
|----|-----------------|-----------------|-----------------|
| O  | 6.190508365176  | 3.337604828748  | -0.859278911281 |
| O  | 7.540382997755  | 0.314106156386  | 0.660581387482  |
| Si | 5.500375535448  | -2.413211542561 | 1.744125325719  |
| Si | 1.033078860752  | -0.322913574884 | -1.034518219133 |
| Si | -0.149684738192 | 0.338591962846  | 0.871216182294  |
| Si | 5.741893449561  | -0.322898164297 | -1.034524268879 |
| Si | 0.791580311482  | -2.413247184781 | 1.744107639240  |
| Si | 4.559136238515  | 0.338636816250  | 0.871234968059  |
| TV | 9.417668584850  | 0.000000000000  | -0.000000000004 |
| TV | 0.531625704606  | 5.403442569754  | -0.000000000000 |
| TV | 0.789798965587  | -2.603257969583 | 4.849643726328  |

### (iii) GeO<sub>2</sub> at 1 atm

#### # EQ-GeO<sub>2</sub> 0

|    |                  |                 |                 |
|----|------------------|-----------------|-----------------|
| O  | 1.174668930605   | 5.679842364884  | 1.932232453888  |
| O  | 12.581911657204  | -4.950596555415 | -2.992287675516 |
| O  | -6.695175407221  | 2.408499448340  | 0.903076406987  |
| O  | 1.659855516300   | 2.222170538604  | -1.557467198404 |
| O  | -1.676464129009  | 8.120803042101  | 4.393719246706  |
| O  | 9.730747710629   | -2.509405344045 | -0.530571580100 |
| O  | -9.546325872485  | 4.849580586948  | 3.364724981410  |
| O  | -1.191158171187  | 4.663314461830  | 0.904223386486  |
| O  | -4.527533692018  | 10.561893748098 | 6.855298625714  |
| O  | 6.879532509308   | -0.068167127202 | 1.931006063043  |
| O  | -12.397481416693 | 7.290802423252  | 5.826259110719  |
| O  | -4.042332228672  | 7.104547751615  | 3.365755567405  |
| Ge | 0.073315468294   | 7.705507644828  | 5.110418399635  |
| Ge | -0.631599613483  | 5.264332092307  | 2.649291819369  |
| Ge | -3.482738300174  | 7.705449040893  | 5.110879764800  |
| Ge | 5.775619674979   | 2.823175615043  | 0.187270202077  |
| Ge | 2.924421560880   | 5.264332930898  | 2.648866642706  |
| Ge | 2.219567545550   | 2.823019704824  | 0.187606240479  |
| TV | 7.110670681914   | -0.000000000149 | -0.000000000548 |
| TV | 3.013986803113   | 3.493480818939  | -0.000000000135 |
| TV | -8.553362070247  | 7.323507465609  | 7.384827293230  |

#### # EQ-GeO<sub>2</sub> 1

|    |                 |                 |                 |
|----|-----------------|-----------------|-----------------|
| O  | 3.727711141923  | 0.416378627976  | 2.601880592209  |
| O  | 6.019921595683  | -2.371614641936 | -0.874983918025 |
| O  | -3.737816778968 | 1.936694446467  | 1.599319650393  |
| O  | -1.451184368212 | 5.270944154821  | -2.345060504891 |
| O  | 3.723278976879  | 2.030557626249  | 5.075180403106  |
| O  | 6.015678105603  | -0.757497770701 | 1.598533387897  |
| O  | -3.741913694347 | 3.550439147680  | 4.072778981791  |
| O  | -1.455381450642 | 6.885155267967  | 0.128406274488  |
| O  | 3.719423144503  | 3.644617159491  | 7.548575301630  |
| O  | 6.011211417066  | 0.856169282725  | 4.072050522039  |
| O  | -3.746280863256 | 5.164751908442  | 6.546176016644  |
| O  | -1.459646043826 | 8.499232279834  | 2.601708532348  |
| Ge | 4.564842988666  | 1.984503655345  | 3.336042258449  |
| Ge | 2.276583236682  | 4.678652188792  | 3.336009976165  |
| Ge | 2.272283169626  | 6.292746013566  | 5.809378550300  |
| Ge | 4.573425752059  | -1.243493014359 | -1.610888297693 |
| Ge | 4.569085576675  | 0.370569549710  | 0.862625968717  |
| Ge | 2.280899900823  | 3.064738794168  | 0.862444147288  |
| TV | 4.573200492309  | -0.000000000006 | -0.000000000011 |
| TV | -0.006074998013 | 5.387878511609  | 0.000000000002  |
| TV | -0.012826935751 | 4.842158764136  | 7.420322793569  |

#### # EQ-GeO<sub>2</sub> 2

|   |                 |                 |                 |
|---|-----------------|-----------------|-----------------|
| O | -3.018698161557 | -1.155225077040 | -1.355971902183 |
| O | 2.207690464070  | -0.526013161215 | 0.773597220121  |
| O | 4.480811653241  | -0.031093439613 | -0.830553419175 |
| O | 1.841461273108  | -0.338440785419 | -1.722321982951 |
| O | -2.118322451477 | -3.288021958312 | -2.964259318052 |
| O | -0.380747707628 | -0.846662710144 | -0.468121613613 |
| O | -1.643921556191 | 1.471051310939  | -1.355552701944 |

|    |                 |                 |                 |
|----|-----------------|-----------------|-----------------|
| O  | 3.582392099530  | 2.100550807295  | 0.773524125368  |
| O  | 5.855512326233  | 2.595182942201  | -0.830219944497 |
| O  | 3.216185313611  | 2.287751354063  | -1.722238975611 |
| O  | -0.743846290595 | -0.661400227718 | -2.964079450579 |
| O  | 0.993976184681  | 1.779655583585  | -0.468140430782 |
| Ge | 4.146936049800  | 3.475178472127  | -0.479948625751 |
| Ge | 4.874072518799  | -1.906318238515 | -1.096360784062 |
| Ge | -1.310222152460 | -2.035718693084 | -1.711850061883 |
| Ge | 6.248670833709  | 0.719959580404  | -1.096206442154 |
| Ge | 2.772038172569  | 0.848892219748  | -0.479983412246 |
| Ge | 0.064529259097  | 0.590493060088  | -1.711859065085 |
| TV | 9.660034818633  | 0.000000000007  | 0.000000000001  |
| TV | 2.749541661728  | 5.252544735225  | 0.000000000014  |
| TV | -3.696197257502 | -1.425398171170 | 3.790082410865  |

# EQ-GeO<sub>2</sub> 3

|    |                 |                 |                 |
|----|-----------------|-----------------|-----------------|
| O  | 2.167389156249  | 5.195709704774  | 1.230491231054  |
| O  | 5.202785490250  | -9.645202855524 | -3.182414012115 |
| O  | -4.695181743848 | 2.486483991552  | 0.819132209688  |
| O  | 1.377124212810  | 3.813109169512  | -1.102172129372 |
| O  | 0.869627753405  | 8.372579558319  | 2.900922057524  |
| O  | 3.904486405616  | -6.468050837425 | -1.512476737388 |
| O  | -5.993264860816 | 5.663806871484  | 2.488825547806  |
| O  | 0.079131371229  | 6.990084657822  | 0.567587353798  |
| O  | -0.429245760547 | 11.550434944356 | 4.569501768577  |
| O  | 2.606299060904  | -3.290668617602 | 0.157268244144  |
| O  | -7.291190015745 | 8.841172379358  | 4.158774786844  |
| O  | -1.218908688885 | 10.167341617846 | 2.237293711930  |
| Ge | 2.562756021722  | 9.238935329619  | 2.570493049483  |
| Ge | 1.139147273728  | 6.577970805732  | 2.151668524690  |
| Ge | -0.158947106174 | 9.755288381264  | 3.821506292912  |
| Ge | 5.158797974200  | 2.884607630248  | -0.769306654098 |
| Ge | 3.860820668354  | 6.061881804795  | 0.900417938844  |
| Ge | 2.437023221202  | 3.400697031985  | 0.481744545610  |
| TV | 5.454163046505  | -0.000000000112 | -0.000000000425 |
| TV | 6.980406539172  | 7.557842014448  | -0.000000000341 |
| TV | -3.894265480106 | 9.531845802352  | 5.009605375781  |

# EQ-GeO<sub>2</sub> 4

|    |                 |                 |                 |
|----|-----------------|-----------------|-----------------|
| O  | 4.089253594421  | 1.101181867237  | 4.045581491445  |
| O  | 7.435783011626  | -1.734586388733 | -7.100387394801 |
| O  | -5.369835109299 | 1.609769091797  | 1.405717912561  |
| O  | 0.677056236619  | 1.859609205333  | -0.933067275020 |
| O  | 2.746053822025  | 4.686131290144  | 4.045440264747  |
| O  | 6.092679789918  | 1.850386185038  | -7.100491430729 |
| O  | -6.712963133377 | 5.194670705063  | 1.405718502849  |
| O  | -0.665989290726 | 5.444573896725  | -0.933143246177 |
| O  | 1.403033970433  | 8.271183485415  | 4.045730981373  |
| O  | 4.749515510194  | 5.435323496738  | -7.100534434262 |
| O  | -8.056077959912 | 8.779655891416  | 1.405824258636  |
| O  | -2.009186316772 | 9.029638304088  | -0.933047985449 |
| Ge | 1.725709641977  | 8.385321527787  | -0.199500087606 |
| Ge | 0.369862141717  | 5.829882623695  | 0.673460181470  |
| Ge | -0.973302133800 | 9.414892629551  | 0.673567922940  |
| Ge | 4.411967140757  | 1.215302777553  | -0.199619165299 |
| Ge | 3.068866912962  | 4.800286692615  | -0.199645358880 |
| Ge | 1.712998793669  | 2.244942168400  | 0.673512671456  |

|    |                 |                 |                 |
|----|-----------------|-----------------|-----------------|
| TV | 5.407048495464  | -0.000000000012 | -0.000000000008 |
| TV | -4.029442228388 | 10.754908848977 | -0.000000000015 |
| TV | 1.347628268556  | 0.512106089824  | 3.526517422646  |

# EQ-GeO<sub>2</sub> 5

|    |                 |                 |                 |
|----|-----------------|-----------------|-----------------|
| O  | -1.804464817208 | -0.720354237923 | -1.613875451708 |
| O  | 2.417408672378  | -0.543560908684 | 1.063091454347  |
| O  | 3.692631098977  | 1.797603960023  | -0.256710493512 |
| O  | 2.310283312531  | 1.283914386341  | -2.318356220870 |
| O  | -4.491107924286 | -5.947845662177 | -3.647767264622 |
| O  | 1.030091297635  | -1.058700739537 | -1.000041017587 |
| O  | -0.265208082679 | 1.899400947434  | 2.388191783928  |
| O  | 3.957421267530  | 2.076423494244  | 5.065974921385  |
| O  | 5.234172494959  | 4.416043057780  | 3.745223507506  |
| O  | 3.850076870891  | 3.903754022161  | 1.684653273154  |
| O  | -2.951418919411 | -3.328318625033 | 0.355064692287  |
| O  | 2.570800985360  | 1.560168304389  | 3.002715411479  |
| Ge | 3.902348441598  | 2.989110023033  | 3.374175400780  |
| Ge | 1.127277878453  | -2.037803625734 | 0.655545857443  |
| Ge | -0.392740644629 | -2.011432824044 | -1.914313956507 |
| Ge | 2.667903768122  | 0.581085706866  | 4.658242664949  |
| Ge | 2.362277342493  | 0.369744652587  | -0.628450125203 |
| Ge | 1.147401745189  | 0.608537342125  | 2.088250171409  |
| TV | 5.489275268615  | 0.000000000006  | 0.000000000001  |
| TV | 3.989284945489  | 4.787433974142  | 0.000000000007  |
| TV | 3.080190457993  | 5.238967466207  | 8.005113400518  |

# EQ-GeO<sub>2</sub> 6

|    |                 |                 |                 |
|----|-----------------|-----------------|-----------------|
| O  | 4.060872367581  | 3.399020165485  | 1.214237051097  |
| O  | 5.258309747643  | -1.562950308852 | -2.768094642451 |
| O  | -8.033748156008 | 1.227657601186  | 1.214130065073  |
| O  | 2.461263353610  | 1.908084304442  | -0.235576544090 |
| O  | 3.269512784843  | 4.699040649584  | 3.748626223215  |
| O  | 4.474061784243  | -0.263574922801 | -0.235564609198 |
| O  | -8.825216132616 | 2.527595882416  | 3.748756649528  |
| O  | 1.674159936034  | 3.208461785275  | 2.293291410996  |
| O  | 2.483744005670  | 5.999025808662  | 6.277572295380  |
| O  | 3.686941902823  | 1.036941002058  | 2.293270536107  |
| O  | -9.610774491266 | 3.827525145692  | 6.277476427082  |
| O  | 0.881524243212  | 4.509099556952  | 4.827157486084  |
| Ge | 3.477120389043  | 2.868637836697  | 3.020579657010  |
| Ge | 1.464424391255  | 5.040153380855  | 3.020563948509  |
| Ge | 0.675059789627  | 6.339373957100  | 5.552945492355  |
| Ge | 5.051933437885  | 0.267413470150  | -2.042398159177 |
| Ge | 4.267357130644  | 1.569301216932  | 0.488075323357  |
| Ge | 2.254695648716  | 3.740864118492  | 0.488113361443  |
| TV | 7.053736066845  | -0.000000000000 | 0.000000000001  |
| TV | 3.028241018162  | 4.342926842348  | 0.000000000003  |
| TV | -2.364155382532 | 3.900446044127  | 7.595272264363  |

# EQ-GeO<sub>2</sub> 7

|   |                 |                 |                 |
|---|-----------------|-----------------|-----------------|
| O | 3.752313848894  | 4.032288259225  | 1.874715602513  |
| O | 2.082599166533  | -4.303529762218 | -3.913554631726 |
| O | -0.674442273085 | 1.963762669355  | 1.203908220553  |
| O | 0.798351383233  | 3.645602417117  | -0.725586753800 |
| O | 6.701204393405  | 4.032324923847  | 1.874739566507  |
| O | 5.031580437869  | -4.303401947809 | -3.913581622056 |



|    |                |                 |                 |
|----|----------------|-----------------|-----------------|
| O  | 2.274560762026 | 1.963780992347  | 1.203910262400  |
| O  | 3.747320621742 | 3.645532632250  | -0.725556766002 |
| O  | 9.650172055899 | 4.032328898830  | 1.874737597037  |
| O  | 7.980519977599 | -4.303470083415 | -3.913575023361 |
| O  | 5.223577517452 | 1.963734399007  | 1.203912904880  |
| O  | 6.696333915552 | 3.645475868519  | -0.725577378549 |
| Ge | 8.077084019707 | -1.170088011576 | -1.354401122340 |
| Ge | 5.224822999813 | 3.838546310493  | 0.575026416895  |
| Ge | 8.173790112710 | 3.838617040582  | 0.575004457247  |
| Ge | 2.179093858273 | -1.170192249617 | -1.354384351883 |
| Ge | 5.128077120932 | -1.170162529859 | -1.354370072187 |
| Ge | 2.275783575292 | 3.838612234675  | 0.575028150016  |
| TV | 8.846990197137 | -0.000000000006 | 0.000000000003  |
| TV | 1.569564778546 | 6.690545478808  | 0.000000000001  |
| TV | 1.572960390414 | 3.326976893439  | 3.858867421552  |

# EQ-GeO<sub>2</sub> 8

|    |                 |                 |                 |
|----|-----------------|-----------------|-----------------|
| O  | 3.010928159406  | 3.512369983664  | 2.322385228219  |
| O  | 4.506823257530  | -2.307652923701 | -4.815095606832 |
| O  | -4.641806555603 | 2.033032567836  | 2.322365345995  |
| O  | 2.161051118866  | 2.032883977826  | 0.323716310800  |
| O  | 3.009536291399  | 6.471034776865  | 2.322344723614  |
| O  | 4.505383224480  | 0.650980667114  | -4.815114190837 |
| O  | -4.643270387940 | 4.991691218735  | 2.322353654855  |
| O  | 2.159625275152  | 4.991536635695  | 0.323713594484  |
| O  | 3.008107809581  | 9.429693675693  | 2.322362737255  |
| O  | 4.503962672093  | 3.609666689873  | -4.815119946380 |
| O  | -4.644714046215 | 7.950384138484  | 2.322398250181  |
| O  | 2.158194951064  | 7.950218553126  | 0.323697820303  |
| Ge | 3.653469003003  | 5.089831771700  | -3.816017535651 |
| Ge | 1.309148957091  | 6.471721411291  | 1.322809935724  |
| Ge | 1.307724290204  | 9.430381123067  | 1.322815905631  |
| Ge | 3.656330808296  | -0.827491444116 | -3.816005064625 |
| Ge | 3.654896990666  | 2.131160855449  | -3.816020354456 |
| Ge | 1.310585878973  | 3.513052789733  | 1.322804647772  |
| TV | 5.102330744609  | -0.000000000002 | 0.000000000001  |
| TV | -0.004304155560 | 8.875974314656  | 0.000000000003  |
| TV | 0.206135489787  | 2.861216846862  | 5.138816347778  |

# EQ-GeO<sub>2</sub> 9

|    |                 |                 |                 |
|----|-----------------|-----------------|-----------------|
| O  | 2.879365382784  | 3.767387268759  | 2.315576895678  |
| O  | 4.865137292414  | -2.701594318426 | -4.797235322844 |
| O  | -4.779751033358 | 2.292857904151  | 2.313732057667  |
| O  | 2.029432181250  | 2.291780194913  | 0.314086836695  |
| O  | 2.871867122019  | 6.719650723814  | 2.313453514734  |
| O  | 4.857393555666  | 0.250563863616  | -4.799306198299 |
| O  | -4.787040035387 | 5.243996366747  | 2.312806216441  |
| O  | 2.022352998185  | 5.240573959396  | 0.316460783606  |
| O  | 2.865381310438  | 9.671606376258  | 2.313595209717  |
| O  | 4.849863360379  | 3.204393932016  | -4.800440791458 |
| O  | -4.794321048136 | 8.194021835384  | 2.316076140842  |
| O  | 2.015084516684  | 8.193057422775  | 0.315908479332  |
| Ge | 3.996160604027  | 4.679511229169  | -3.799232546991 |
| Ge | 1.167508912070  | 6.719141310362  | 1.315146003859  |
| Ge | 1.161128768456  | 9.670265200756  | 1.315326009963  |
| Ge | 4.009699247501  | -1.222868618031 | -3.799837218447 |
| Ge | 4.002796987436  | 1.728032934220  | -3.800585739793 |

|    |                 |                 |                |
|----|-----------------|-----------------|----------------|
| Ge | 1.175625805172  | 3.766985773261  | 1.314865125430 |
| TV | 5.108502285764  | -0.000000000001 | 0.000000000001 |
| TV | -0.021465977280 | 8.854576939047  | 0.000000000009 |
| TV | -0.277099475569 | 3.515018688236  | 5.114438413928 |

# EQ-GeO<sub>2</sub> 10

|    |                 |                 |                 |
|----|-----------------|-----------------|-----------------|
| O  | 1.476883981410  | 3.744268769719  | 2.414493054806  |
| O  | 10.362519169302 | -6.605006010909 | -4.577355313032 |
| O  | -6.200278463356 | 2.819784367487  | 1.266134493746  |
| O  | -0.236752826483 | 3.449465109701  | -1.136311208675 |
| O  | 1.484438613579  | 5.599739837042  | 4.707171142024  |
| O  | 10.371128552567 | -4.754172662960 | -2.284776912562 |
| O  | -6.192261205387 | 4.673747898671  | 3.561425911343  |
| O  | -0.228097336265 | 5.300271715866  | 1.156226973392  |
| O  | 1.492454337351  | 7.453723042551  | 7.002422033830  |
| O  | 10.378037075904 | -2.899925654172 | 0.009551241258  |
| O  | -6.183626331282 | 6.524235839238  | 5.855466248927  |
| O  | -0.221236123183 | 7.154515266617  | 3.450624364971  |
| Ge | 3.190734063513  | 6.377046392061  | 4.080460950127  |
| Ge | 0.628940210369  | 5.450359826063  | 2.932528026694  |
| Ge | 0.636179456211  | 7.303659792399  | 5.226706214667  |
| Ge | 3.174358230967  | 2.670370382669  | -0.508502654526 |
| Ge | 3.181619745292  | 4.523685461199  | 1.785694665545  |
| Ge | 0.621113104594  | 3.597130599845  | 0.639425253392  |
| TV | 5.115085408024  | -0.000000000002 | 0.000000000001  |
| TV | -2.938730015319 | 7.274489559300  | 0.000000000002  |
| TV | 0.024261665317  | 5.559927055154  | 6.882032874727  |

# EQ-GeO<sub>2</sub> 11

|    |                 |                 |                 |
|----|-----------------|-----------------|-----------------|
| O  | 1.917022724603  | 3.208604040441  | 2.552937340035  |
| O  | 7.976495685884  | -6.002310811644 | -4.641052873565 |
| O  | -5.751133982519 | 2.365995383242  | 1.344020672545  |
| O  | 0.211817914576  | 3.162643994097  | -1.014221140817 |
| O  | 1.918457982191  | 4.893752769599  | 4.970872893892  |
| O  | 7.977948237945  | -4.317125154076 | -2.223173393747 |
| O  | -5.749661166361 | 4.051140507084  | 3.761900558814  |
| O  | 0.213241569539  | 4.847775217364  | 1.403691114182  |
| O  | 1.919880519012  | 6.578950809525  | 7.388771605824  |
| O  | 7.979320083672  | -2.631993667531 | 0.194725314082  |
| O  | -5.748260907259 | 5.736328522181  | 6.179788385322  |
| O  | 0.214655788393  | 6.532985197445  | 3.821573073307  |
| Ge | 3.622841260845  | 5.713293092247  | 4.397186676233  |
| Ge | 1.066318237343  | 4.870720333472  | 3.188230823876  |
| Ge | 1.067744544151  | 6.555902314740  | 5.606106563581  |
| Ge | 3.619987158896  | 2.342977946540  | -0.438596601048 |
| Ge | 3.621405488265  | 4.028153561841  | 1.979273315628  |
| Ge | 1.064884763051  | 3.185524964045  | 0.770311712139  |
| TV | 5.111607061632  | -0.000000000002 | 0.000000000001  |
| TV | -0.099404924920 | 6.637199789810  | 0.000000000001  |
| TV | 0.004270659342  | 5.055521899085  | 7.253696292824  |

# EQ-GeO<sub>2</sub> 12

|   |                 |                 |                 |
|---|-----------------|-----------------|-----------------|
| O | 1.908084278450  | 3.209155913119  | 2.546279955422  |
| O | 8.456574099288  | -6.002952611264 | -4.675698622698 |
| O | -5.761879696749 | 2.382115188450  | 1.328722029130  |
| O | 0.204142365784  | 3.210076261376  | -1.022979399878 |
| O | 1.909180952487  | 4.863294776604  | 4.981445978579  |

|    |                 |                 |                 |
|----|-----------------|-----------------|-----------------|
| O  | 8.457709423909  | -4.348832705166 | -2.240560431215 |
| O  | -5.760823852971 | 4.036243182571  | 3.763873168317  |
| O  | 0.205201389605  | 4.864164891446  | 1.412184107308  |
| O  | 1.910295207293  | 6.517384950155  | 7.416574695769  |
| O  | 8.458772390013  | -2.694741318331 | 0.194615377505  |
| O  | -5.759694058431 | 5.690355515748  | 6.199032148166  |
| O  | 0.206295288795  | 6.518274884849  | 3.847333647749  |
| Ge | 3.614278055968  | 5.690597269356  | 4.415276579563  |
| Ge | 1.057248247429  | 4.863543138455  | 3.197687887801  |
| Ge | 1.058348715423  | 6.517670570008  | 5.632833239199  |
| Ge | 3.612114584311  | 2.382372874470  | -0.455034803774 |
| Ge | 3.613191568437  | 4.036468080572  | 1.980129756378  |
| Ge | 1.056167142603  | 3.209430371359  | 0.762530155533  |
| TV | 5.112965803413  | -0.000000000002 | 0.000000000001  |
| TV | -0.584633543891 | 6.731837532364  | 0.000000000002  |
| TV | 0.003267697556  | 4.962322076959  | 7.305460020104  |

# EQ-GeO<sub>2</sub> 13

|    |                 |                 |                 |
|----|-----------------|-----------------|-----------------|
| O  | 1.878039022117  | 3.282691947695  | 2.551070718386  |
| O  | 8.615409674437  | -6.838319890080 | -4.620141776933 |
| O  | -5.797589432575 | 2.426390384333  | 1.349861036162  |
| O  | 0.165475134193  | 3.193701631564  | -1.017289645941 |
| O  | 1.888318209935  | 4.995763130332  | 4.953251612251  |
| O  | 8.625591339927  | -5.125389957949 | -2.218145578580 |
| O  | -5.787493988028 | 4.139204981189  | 3.752218933487  |
| O  | 0.175188180599  | 4.906608170152  | 1.385412180273  |
| O  | 1.898966529909  | 6.708521680016  | 7.355742895849  |
| O  | 8.636204227569  | -3.413144984883 | 0.184179665328  |
| O  | -5.777213534484 | 5.851809744942  | 6.154021700953  |
| O  | 0.185765257862  | 6.619488800018  | 3.787419882961  |
| Ge | 3.594446344516  | 5.808021726395  | 4.371767117624  |
| Ge | 1.032318443331  | 4.951610533444  | 3.170782770123  |
| Ge | 1.042873092901  | 6.664542985912  | 5.572909497153  |
| Ge | 3.573747284428  | 2.382291314008  | -0.432694170856 |
| Ge | 3.584030452354  | 4.094915026490  | 1.969889036146  |
| Ge | 1.022009989857  | 3.238780607463  | 0.768481690629  |
| TV | 5.113841210476  | -0.000000000002 | 0.000000000001  |
| TV | -0.794998439485 | 7.462900905667  | 0.000000000002  |
| TV | 0.031241862023  | 5.138398466952  | 7.206824637622  |

# EQ-GeO<sub>2</sub> 14

|    |                 |                 |                 |
|----|-----------------|-----------------|-----------------|
| O  | 2.022671575455  | 4.215835900264  | 2.444224305559  |
| O  | 7.507000373600  | -8.151538137081 | -4.540535831928 |
| O  | -5.638381069204 | 3.285926111511  | 1.297638144826  |
| O  | 0.322901530190  | 3.914319135581  | -1.106657894433 |
| O  | 2.018753187665  | 6.072570791495  | 4.731556888414  |
| O  | 7.505261587328  | -6.295179254056 | -2.253950049765 |
| O  | -5.640461611212 | 5.141868512251  | 3.584830413307  |
| O  | 0.321198982682  | 5.770653524841  | 1.179975452748  |
| O  | 2.016631089555  | 7.928538901088  | 7.018753678998  |
| O  | 7.500652421593  | -4.439520709886 | 0.035261077356  |
| O  | -5.644122844379 | 7.002487850267  | 5.878190855003  |
| O  | 0.316556981642  | 7.626287352254  | 3.469212864139  |
| Ge | 3.722147922950  | 6.848545484054  | 4.101925304945  |
| Ge | 1.169753812641  | 5.921168983259  | 2.955814843757  |
| Ge | 1.166324192433  | 7.780564236695  | 5.244567502226  |
| Ge | 3.728553387745  | 3.134547554139  | -0.478138807957 |

|    |                 |                 |                |
|----|-----------------|-----------------|----------------|
| Ge | 3.725133830262  | 4.993895754160  | 1.810660043398 |
| Ge | 1.172964288677  | 4.061932669728  | 0.667951865198 |
| TV | 5.107962760700  | -0.000000000002 | 0.000000000001 |
| TV | 0.482703364994  | 9.279174379775  | 0.000000000003 |
| TV | -0.009646924200 | 5.573296651270  | 6.867864946318 |

# EQ-GeO<sub>2</sub> 15

|    |                 |                  |                 |
|----|-----------------|------------------|-----------------|
| O  | 1.641898583242  | 4.595013378970   | 2.519850863669  |
| O  | 9.099670103177  | -11.096946115811 | -4.818259853117 |
| O  | -6.001563311730 | 3.809382033685   | 1.265440565208  |
| O  | -0.055464521578 | 4.726235390588   | -1.055065863510 |
| O  | 1.637860647548  | 6.166243237189   | 5.028602084507  |
| O  | 9.095671743064  | -9.525732985705  | -2.309520226905 |
| O  | -6.005562228845 | 5.380664638196   | 3.774226137201  |
| O  | -0.059517362498 | 6.297402466624   | 1.453735131203  |
| O  | 1.633806121475  | 7.737452115736   | 7.537342886735  |
| O  | 9.091574343531  | -7.954583651046  | 0.199308986405  |
| O  | -6.009622485286 | 6.951773114770   | 6.282989115524  |
| O  | -0.063535822859 | 7.868608556799   | 3.962476100763  |
| Ge | 3.335198624173  | 7.019027420451   | 4.498782659677  |
| Ge | 0.788732558203  | 6.233428561907   | 3.244403025807  |
| Ge | 0.784673824200  | 7.804657787076   | 5.753148700989  |
| Ge | 3.343287365392  | 3.876597262471   | -0.518729197717 |
| Ge | 3.339224221193  | 5.447823526023   | 1.990029144743  |
| Ge | 0.792763093782  | 4.662209245689   | 0.735648000675  |
| TV | 5.096956661083  | -0.000000000004  | 0.000000000001  |
| TV | -1.503660747540 | 13.466398115735  | -0.000000000000 |
| TV | -0.012230128872 | 4.713616106293   | 7.526240439266  |

# EQ-GeO<sub>2</sub> 16

|    |                 |                 |                 |
|----|-----------------|-----------------|-----------------|
| O  | 2.464845604793  | 3.693073604759  | 2.456504925471  |
| O  | 5.947643303595  | -7.747739239402 | -5.010505413579 |
| O  | -5.182473400420 | 2.995448423719  | 1.153078487685  |
| O  | 0.766169683802  | 4.065971406511  | -1.100307182914 |
| O  | 2.463765824123  | 5.088598907104  | 5.063438350673  |
| O  | 5.946602461852  | -6.352203684099 | -2.403745898902 |
| O  | -5.183445152159 | 4.390868682859  | 3.759907902930  |
| O  | 0.765328412976  | 5.461501447076  | 1.506546449262  |
| O  | 2.462679615841  | 6.484196946342  | 7.670176200326  |
| O  | 5.945601795998  | -4.956756177434 | 0.203019184289  |
| O  | -5.184524425162 | 5.786472864612  | 6.366755884739  |
| O  | 0.764173762196  | 6.856889645747  | 4.113348889529  |
| Ge | 4.163349296754  | 5.973735855322  | 4.590775091519  |
| Ge | 1.614654186233  | 5.275923802927  | 3.287401610968  |
| Ge | 1.613600701689  | 6.671566999226  | 5.894164150098  |
| Ge | 4.165354550006  | 3.182798397291  | -0.622959352854 |
| Ge | 4.164397944656  | 4.578305880488  | 1.983877741484  |
| Ge | 1.615631138206  | 3.880529574430  | 0.680501499875  |
| TV | 5.098476472408  | -0.000000000004 | 0.000000000001  |
| TV | 2.467797416268  | 9.720376307080  | -0.000000000001 |
| TV | -0.003010538500 | 4.186508608109  | 7.820544070236  |

# EQ-GeO<sub>2</sub> 17

|   |                 |                  |                 |
|---|-----------------|------------------|-----------------|
| O | 1.532477789454  | 6.207219874498   | 2.251706138854  |
| O | 9.123095520599  | -18.496038728757 | -4.699183806725 |
| O | -6.143970152239 | 6.434085388547   | 0.799333659831  |
| O | -0.172210555122 | 8.641095962237   | -0.342100851736 |

|    |                 |                  |                 |
|----|-----------------|------------------|-----------------|
| O  | 1.530272192926  | 5.753335963196   | 5.156388364291  |
| O  | 9.120867291313  | -18.949839028816 | -1.794455600873 |
| O  | -6.146206419598 | 5.980290736649   | 3.704005511258  |
| O  | -0.174420254343 | 8.187304669489   | 2.562653121617  |
| O  | 1.528063449271  | 5.299513181733   | 8.061086053304  |
| O  | 9.118674293851  | -19.403657457745 | 1.110253318201  |
| O  | -6.148346441999 | 5.526404205729   | 6.608747187193  |
| O  | -0.176632347835 | 7.733472102714   | 5.467341924817  |
| Ge | 3.236542955522  | 6.743787604092   | 5.310289196954  |
| Ge | 0.678448513543  | 6.970706386672   | 3.857951536758  |
| Ge | 0.676234191091  | 6.516881831561   | 6.762651104967  |
| Ge | 3.240972583924  | 7.651406194570   | -0.499156027030 |
| Ge | 3.238743125728  | 7.197689168849   | 2.405590847936  |
| Ge | 0.680650150385  | 7.424550542150   | 0.953230364208  |
| TV | 5.118369634217  | -0.000000000004  | -0.000000000001 |
| TV | -1.614405330503 | 27.817876369070  | -0.000000000002 |
| TV | -0.006644687639 | -1.361466408612  | 8.714154430564  |

# EQ-GeO<sub>2</sub> 18

|    |                  |                  |                 |
|----|------------------|------------------|-----------------|
| O  | -5.766368469018  | 14.212375595234  | 2.210641075849  |
| O  | 32.244033590910  | -43.469104156535 | -4.682198523553 |
| O  | -13.433434160773 | 14.471341848371  | 0.761635106800  |
| O  | -7.471859543149  | 16.703372489412  | -0.335351848336 |
| O  | -5.762287720792  | 13.694623251325  | 5.108550277321  |
| O  | 32.248327522611  | -43.986910108493 | -1.784336789183 |
| O  | -13.429184915239 | 13.953576622115  | 3.659675661361  |
| O  | -7.467593698351  | 16.185552600250  | 2.562554134238  |
| O  | -5.758107820294  | 13.176937447614  | 8.006342041881  |
| O  | 32.252305848824  | -44.504790540080 | 1.113708525221  |
| O  | -13.424917300046 | 13.435634088459  | 6.557560901167  |
| O  | -7.463289137505  | 15.668056572001  | 5.460284439792  |
| Ge | -4.058243038291  | 14.681646443394  | 5.282022255696  |
| Ge | -6.615176991536  | 14.940506598988  | 3.833035175787  |
| Ge | -6.611117817382  | 14.422983570321  | 6.730899177079  |
| Ge | -4.066753133434  | 15.717104424852  | -0.513827182622 |
| Ge | -4.062434997154  | 15.199457245479  | 2.384117517538  |
| Ge | -6.619496044075  | 15.458265671110  | 0.935139092567  |
| TV | 5.109864619220   | -0.000000000046  | 0.000000000009  |
| TV | -32.057276681552 | 60.949312447350  | -0.000000000070 |
| TV | 0.012581986456   | -1.553298247511  | 8.693724448768  |

# EQ-GeO<sub>2</sub> 19

|    |                 |                  |                 |
|----|-----------------|------------------|-----------------|
| O  | -0.500197315886 | 9.097295525888   | 2.232817979176  |
| O  | 15.629001207996 | -28.245622076857 | -4.686548690366 |
| O  | -8.173112055520 | 9.338969038280   | 0.783176868800  |
| O  | -2.202874320317 | 11.558708652560  | -0.337693063535 |
| O  | -0.500802178726 | 8.614145796604   | 5.132114283043  |
| O  | 15.628449681613 | -28.728724640720 | -1.787259877600 |
| O  | -8.173814202870 | 8.855739862197   | 3.682473673000  |
| O  | -2.203469504624 | 11.075485770715  | 2.561610775092  |
| O  | -0.501279449664 | 8.130987560729   | 8.031243028206  |
| O  | 15.627852063886 | -29.211857589850 | 1.112031456780  |
| O  | -8.174343148028 | 8.372591634652   | 6.581597907406  |
| O  | -2.204134990747 | 10.592406351091  | 5.460774678218  |
| Ge | 1.205774015295  | 9.603715054357   | 5.294202700184  |
| Ge | -1.351663720195 | 9.845235779163   | 3.844596632874  |
| Ge | -1.352238044120 | 9.362120933399   | 6.743794105884  |

|    |                  |                 |                 |
|----|------------------|-----------------|-----------------|
| Ge | 1.206924739113   | 10.570045694925 | -0.504268531111 |
| Ge | 1.206358149749   | 10.086834903190 | 2.394952905055  |
| Ge | -1.351044736932  | 10.328471723881 | 0.945395489969  |
| TV | 5.115460089394   | -0.000000000003 | -0.000000000000 |
| TV | -10.157875075885 | 40.529094670853 | 0.000000000008  |
| TV | -0.001720148166  | -1.449500657912 | 8.697669754516  |

# EQ-GeO<sub>2</sub> 20

|    |                 |                  |                 |
|----|-----------------|------------------|-----------------|
| O  | 1.635587995461  | 4.772325154926   | 2.349500148527  |
| O  | 8.918758643785  | -15.106344071497 | -4.897974698470 |
| O  | -6.023473037102 | 4.855465755684   | 0.877044853680  |
| O  | -0.065253667099 | 6.938519606804   | -0.480527659723 |
| O  | 1.633439143445  | 4.606049272165   | 5.294428348340  |
| O  | 8.916623642301  | -15.272633134578 | -1.953011819682 |
| O  | -6.025611491103 | 4.689203863660   | 3.821965067859  |
| O  | -0.067371417537 | 6.772291101466   | 2.464407384022  |
| O  | 1.631297283980  | 4.439787288491   | 8.239407294349  |
| O  | 8.914476963696  | -15.438887204588 | 0.991945386572  |
| O  | -6.027757492604 | 4.522878227755   | 6.766915994363  |
| O  | -0.069536006320 | 6.605979106692   | 5.409373854611  |
| Ge | 3.335051997384  | 5.606082438939   | 5.353069770016  |
| Ge | 0.782743534400  | 5.689237912681   | 3.880579325246  |
| Ge | 0.780600851456  | 5.522936370417   | 6.825535059712  |
| Ge | 3.339319040221  | 5.938629844443   | -0.536850282351 |
| Ge | 3.337193842129  | 5.772373912318   | 2.408118831238  |
| Ge | 0.784877030788  | 5.855490233742   | 0.935638954140  |
| TV | 5.106750126938  | -0.000000000019  | -0.000000000001 |
| TV | -1.320688706489 | 22.294310272306  | 0.000000000014  |
| TV | -0.006405384186 | -0.498800930813  | 8.834884256825  |

# EQ-GeO<sub>2</sub> 21

|    |                 |                  |                 |
|----|-----------------|------------------|-----------------|
| O  | 2.049015913015  | 3.921546698648   | 2.559468334235  |
| O  | 7.549316049800  | -10.268727528317 | -5.073219011564 |
| O  | -5.630089163896 | 3.531858721282   | 1.138325663118  |
| O  | 0.335708617696  | 5.074299520460   | -0.809351369307 |
| O  | 2.055713669438  | 4.701134302105   | 5.402037204989  |
| O  | 7.555986558989  | -9.489165766039  | -2.230689083848 |
| O  | -5.623431768367 | 4.311439629212   | 3.980891165052  |
| O  | 0.342402041081  | 5.853812284719   | 2.033176586660  |
| O  | 2.062375731024  | 5.480733522158   | 8.244603578132  |
| O  | 7.562638258832  | -8.709584960936  | 0.611812668170  |
| O  | -5.616774574440 | 5.090959447004   | 6.823460365808  |
| O  | 0.349054929906  | 6.633367999442   | 4.875678325638  |
| Ge | 3.761562649433  | 5.667411707003   | 5.139028061309  |
| Ge | 1.199669385212  | 5.277549849713   | 3.717772484618  |
| Ge | 1.206332867143  | 6.057092862894   | 6.560313848113  |
| Ge | 3.748254195635  | 4.108368442662   | -0.546001381163 |
| Ge | 3.754892195013  | 4.887890756539   | 2.296497949678  |
| Ge | 1.193022044885  | 4.498008954668   | 0.875243402553  |
| TV | 5.117155133961  | -0.000000000004  | -0.000000000001 |
| TV | 0.451989786980  | 14.173769809863  | -0.000000000001 |
| TV | 0.019978770654  | 2.338634407296   | 8.527544151414  |

# EQ-GeO<sub>2</sub> 22

|   |                 |                  |                 |
|---|-----------------|------------------|-----------------|
| O | 1.993957009589  | 4.683368909429   | 2.568535060710  |
| O | 7.832306905235  | -13.087694168639 | -5.063923323823 |
| O | -5.660253621217 | 4.280420627834   | 1.150572406404  |

|    |                 |                  |                 |
|----|-----------------|------------------|-----------------|
| O  | 0.297402006799  | 5.806422820451   | -0.810330376510 |
| O  | 1.992222465564  | 5.489192114325   | 5.403722670591  |
| O  | 7.830400422524  | -12.282141477265 | -2.228256893919 |
| O  | -5.661937334614 | 5.086336337478   | 3.986106209490  |
| O  | 0.295566889999  | 6.611724856721   | 2.024905270817  |
| O  | 1.990127862571  | 6.294820290147   | 8.239049814885  |
| O  | 7.828573663573  | -11.476789600246 | 0.607287766114  |
| O  | -5.663906081257 | 5.892080253125   | 6.821335691589  |
| O  | 0.294137063096  | 7.417565630418   | 4.860187186476  |
| Ge | 3.694259002434  | 6.453472167745   | 5.131749128730  |
| Ge | 1.143390645105  | 6.050515901799   | 3.714181081900  |
| Ge | 1.141550234513  | 6.856337978840   | 6.549651368773  |
| Ge | 3.698033898082  | 4.842089751957   | -0.538926751848 |
| Ge | 3.696188038165  | 5.647545423587   | 2.296539172212  |
| Ge | 1.145319629980  | 5.244777236742   | 0.878871714737  |
| TV | 5.103408772277  | -0.000000000004  | -0.000000000001 |
| TV | 0.123301126110  | 17.685566025319  | -0.000000000001 |
| TV | -0.005748783365 | 2.416913197938   | 8.506192613015  |

# EQ-GeO<sub>2</sub> 23

|    |                 |                  |                 |
|----|-----------------|------------------|-----------------|
| O  | 1.641888794459  | 4.328593486095   | 2.549606146143  |
| O  | 8.901194156493  | -11.392255944757 | -5.088673743825 |
| O  | -6.013123038993 | 3.950847847823   | 1.123502004431  |
| O  | -0.054626358470 | 5.510012202879   | -0.810284169884 |
| O  | 1.636973634508  | 5.084052497268   | 5.401900063330  |
| O  | 8.896315014910  | -10.636847847819 | -2.236430895738 |
| O  | -6.017948460088 | 4.706327556469   | 3.975823268149  |
| O  | -0.059572469161 | 6.265369413759   | 2.041952608966  |
| O  | 1.632074152559  | 5.839428147825   | 8.254134506180  |
| O  | 8.891390892117  | -9.881458991478  | 0.615823634810  |
| O  | -6.022889951939 | 5.461744574732   | 6.828048656464  |
| O  | -0.064444836642 | 7.020812037820   | 4.894242190420  |
| Ge | 3.338546971458  | 6.052690197611   | 5.148228341546  |
| Ge | 0.788508714218  | 5.675010483283   | 3.722074659999  |
| Ge | 0.783607863436  | 6.430423932741   | 6.574324918585  |
| Ge | 3.348341612265  | 4.541887952026   | -0.556318012323 |
| Ge | 3.343449334106  | 5.297234177028   | 2.295962414629  |
| Ge | 0.793388226798  | 4.919575170164   | 0.869797865419  |
| TV | 5.104992563514  | -0.000000000003  | 0.000000000001  |
| TV | -1.291008806927 | 15.769127729855  | 0.000000000001  |
| TV | -0.014698350990 | 2.266200519076   | 8.556797994972  |

# EQ-GeO<sub>2</sub> 24

|    |                 |                  |                 |
|----|-----------------|------------------|-----------------|
| O  | 1.704102226146  | 5.210340671767   | 2.591307729192  |
| O  | 8.739835755299  | -14.696509930272 | -5.037026630165 |
| O  | -5.964841198315 | 4.789971851572   | 1.179630489399  |
| O  | 0.000594214664  | 6.288861333965   | -0.802042337202 |
| O  | 1.703955655829  | 6.051109050433   | 5.414691423722  |
| O  | 8.739603673128  | -13.855703004243 | -2.213658188362 |
| O  | -5.965008005992 | 5.630682552805   | 4.003009120687  |
| O  | 0.000384948519  | 7.129627445225   | 2.021391737624  |
| O  | 1.703731214770  | 6.891917048356   | 8.237991327276  |
| O  | 8.739496765986  | -13.014922796443 | 0.609679028735  |
| O  | -5.965185604578 | 6.471481033892   | 6.826313810434  |
| O  | 0.000252064890  | 7.970368867414   | 4.844610096112  |
| Ge | 3.408826738323  | 7.010725660501   | 5.129742837499  |
| Ge | 0.852569344999  | 6.590252127320   | 3.718102112059  |

|    |                 |                 |                 |
|----|-----------------|-----------------|-----------------|
| Ge | 0.852377129784  | 7.431101270495  | 6.541413218842  |
| Ge | 3.409141743986  | 5.329146259803  | -0.516921576226 |
| Ge | 3.408999258144  | 6.169929948731  | 2.306400928092  |
| Ge | 0.852708157668  | 5.749576108638  | 0.894745701422  |
| TV | 5.112699555842  | -0.000000000004 | -0.000000000001 |
| TV | -1.069933213292 | 19.724187892931 | -0.000000000001 |
| TV | -0.000495721709 | 2.522352471448  | 8.469998731822  |

# EQ-GeO<sub>2</sub> 25

|    |                  |                  |                 |
|----|------------------|------------------|-----------------|
| O  | -1.136044397583  | 9.783335291152   | 2.285460041529  |
| O  | 17.344876726874  | -30.274186324189 | -4.824569023843 |
| O  | -8.800297254518  | 9.943297503833   | 0.819669466495  |
| O  | -2.840707820457  | 12.093694815671  | -0.427160458345 |
| O  | -1.135522145253  | 9.463419168839   | 5.217068829823  |
| O  | 17.345362862178  | -30.594074400672 | -1.892947676780 |
| O  | -8.799790642410  | 9.623357285447   | 3.751219346441  |
| O  | -2.840208470728  | 11.773771819070  | 2.504443256250  |
| O  | -1.135023578527  | 9.143518318344   | 8.148653628550  |
| O  | 17.345884726861  | -30.914014652140 | 1.038629231755  |
| O  | -8.799254061336  | 9.303452553831   | 6.682837898250  |
| O  | -2.839698265654  | 11.453864250121  | 5.436024949994  |
| Ge | 0.566557390232   | 10.458616871376  | 5.328218017669  |
| Ge | -1.988375434785  | 10.618566674924  | 3.862396803952  |
| Ge | -1.987844295337  | 10.298671388070  | 6.794000275761  |
| Ge | 0.565553347654   | 11.098478759820  | -0.534988943847 |
| Ge | 0.566037538116   | 10.778547386104  | 2.396603823283  |
| Ge | -1.988863763035  | 10.938495522387  | 0.930803377375  |
| TV | 5.109324575851   | -0.000000000003  | -0.000000000000 |
| TV | -12.522365497003 | 42.847764313120  | 0.000000000009  |
| TV | 0.001504266951   | -0.959772391090  | 8.794827379935  |

# EQ-GeO<sub>2</sub> 26

|    |                  |                  |                 |
|----|------------------|------------------|-----------------|
| O  | -3.104999926309  | 11.775801274978  | 2.358208575317  |
| O  | 23.547606707289  | -36.573978021188 | -4.897120078579 |
| O  | -10.773168263999 | 11.851166220309  | 0.886387721946  |
| O  | -4.810376807145  | 13.926995511583  | -0.481733327039 |
| O  | -3.100813988952  | 11.625097147526  | 5.301701008125  |
| O  | 23.551950463490  | -36.724721664550 | -1.953521095104 |
| O  | -10.769024220112 | 11.700475106073  | 3.829975183363  |
| O  | -4.805997875717  | 13.776291765610  | 2.461743664025  |
| O  | -3.096464789860  | 11.474376097797  | 8.245172411968  |
| O  | 23.556268831147  | -36.875388074617 | 0.990022026351  |
| O  | -10.764761220881 | 11.549611405663  | 6.773515986960  |
| O  | -4.801816901849  | 13.625563758407  | 5.405246574784  |
| Ge | -1.395819221427  | 12.625248753207  | 5.353882180376  |
| Ge | -3.953289285435  | 12.700594152749  | 3.882104039901  |
| Ge | -3.949038099149  | 12.549877303217  | 6.825608158805  |
| Ge | -1.404365435975  | 12.926708209181  | -0.533197077279 |
| Ge | -1.400066680933  | 12.776005380564  | 2.410351794751  |
| Ge | -3.957541178779  | 12.851314066071  | 0.938576507253  |
| TV | 5.110708145760   | -0.000000000009  | 0.000000000005  |
| TV | -20.698442471039 | 50.727067643948  | 0.000000000013  |
| TV | 0.012905351913   | -0.452146741165  | 8.830594040124  |

# EQ-GeO<sub>2</sub> 27

|   |                |                  |                 |
|---|----------------|------------------|-----------------|
| O | 1.647160527791 | 5.465100572393   | 2.301387689936  |
| O | 8.722841857505 | -16.935714077802 | -4.851382851543 |



|    |                 |                  |                 |
|----|-----------------|------------------|-----------------|
| O  | -6.018305359690 | 5.610451893858   | 0.831454068904  |
| O  | -0.057703181354 | 7.743138660193   | -0.441539183045 |
| O  | 1.646983896640  | 5.174448860095   | 5.241280545369  |
| O  | 8.722679187654  | -17.226379641072 | -1.911500131730 |
| O  | -6.018492809608 | 5.319782573721   | 3.771340899913  |
| O  | -0.057886364498 | 7.452454346140   | 2.498350001078  |
| O  | 1.646800812275  | 4.883760810965   | 8.181161076338  |
| O  | 8.722479245478  | -17.517060165808 | 1.028395767799  |
| O  | -6.018666311799 | 5.029087475378   | 6.711224212816  |
| O  | -0.058070910753 | 7.161792511952   | 5.438250176192  |
| Ge | 3.349623014151  | 6.167992744867   | 5.341717366956  |
| Ge | 0.794522850516  | 6.313311566597   | 3.871770879814  |
| Ge | 0.794339589731  | 6.022643003439   | 6.811661188802  |
| Ge | 3.349986701523  | 6.749327054780   | -0.538083212362 |
| Ge | 3.349790517531  | 6.458658984316   | 2.401820747859  |
| Ge | 0.794704322356  | 6.603977230740   | 0.931875233270  |
| TV | 5.110367077121  | -0.000000000004  | -0.000000000001 |
| TV | -1.114724318271 | 25.114866592581  | -0.000000000001 |
| TV | -0.000545797517 | -0.872036379708  | 8.819679450219  |

# EQ-GeO<sub>2</sub> 28

|    |                  |                  |                 |
|----|------------------|------------------|-----------------|
| O  | -4.227021068936  | 12.815663416019  | 2.333653650624  |
| O  | 27.202800303428  | -39.305875989374 | -4.895465319581 |
| O  | -11.889040634729 | 12.915860923480  | 0.860312543943  |
| O  | -5.932508464501  | 15.011307574684  | -0.475426998832 |
| O  | -4.229049590552  | 12.615241181384  | 5.280340949486  |
| O  | 27.200763909512  | -39.506301856653 | -1.948788286864 |
| O  | -11.891109272643 | 12.715461103747  | 3.806993108455  |
| O  | -5.934543419194  | 14.810878282623  | 2.471239213367  |
| O  | -4.231094791065  | 12.414800549039  | 8.227015745768  |
| O  | 27.198750400222  | -39.706748037922 | 0.997920206098  |
| O  | -11.893121684497 | 12.515002759370  | 6.753667553757  |
| O  | -5.936561453705  | 14.610445391201  | 5.417935569314  |
| Ge | -2.528297127386  | 13.612825794908  | 5.350925599660  |
| Ge | -5.081638086493  | 13.713063209602  | 3.877578400280  |
| Ge | -5.083675126379  | 13.512632004136  | 6.824269049464  |
| Ge | -2.524226107250  | 14.013665526682  | -0.542448810191 |
| Ge | -2.526260306153  | 13.813245131831  | 2.404242554505  |
| Ge | -5.079593834300  | 13.913471200284  | 0.930883850998  |
| TV | 5.108728974917   | -0.000000000047  | 0.000000000016  |
| TV | -25.469165552333 | 54.617831621312  | -0.000000000055 |
| TV | -0.006093150603  | -0.601296916514  | 8.840058906286  |

# EQ-GeO<sub>2</sub> 29

|    |                 |                 |                 |
|----|-----------------|-----------------|-----------------|
| O  | -1.100193972725 | -0.458288061369 | -2.031042142620 |
| O  | 1.001247000895  | -1.243839020828 | 2.237607800722  |
| O  | 3.162530730692  | 2.059476749901  | -0.579293005513 |
| O  | 3.162100629121  | 2.015126548059  | -3.410070856171 |
| O  | -3.251525389605 | -6.201998057291 | -3.392770743534 |
| O  | 1.007580371271  | -1.314960150632 | -0.580725601338 |
| O  | 3.157812637750  | -0.458287115871 | -2.031063444361 |
| O  | 5.259211688887  | -1.243834460126 | 2.237626699729  |
| O  | 7.420509731846  | 2.059476582752  | -0.579273320534 |
| O  | 7.420086770615  | 2.015134502767  | -3.410085348578 |
| O  | 1.006364193359  | -6.202069059108 | -3.392864297472 |
| O  | 5.265573055977  | -1.314971341842 | -0.580734087013 |
| Ge | 6.332859039142  | 0.383350454002  | -0.580282472493 |

|    |                 |                 |                 |
|----|-----------------|-----------------|-----------------|
| Ge | -0.054807578496 | -2.091949233764 | 0.846964124629  |
| Ge | -0.055099414281 | -2.095153035665 | -2.007153127810 |
| Ge | 4.203152677233  | -2.091951039857 | 0.846988951907  |
| Ge | 2.074893981969  | 0.383358357691  | -0.580287374547 |
| Ge | 4.202859902120  | -2.095151153162 | -2.007145218579 |
| TV | 8.515960515928  | 0.000000000012  | 0.000000000002  |
| TV | 4.263180852675  | 4.952006679678  | 0.000000000007  |
| TV | -0.000553142088 | 2.481011435655  | 4.280170029010  |

# EQ-GeO<sub>2</sub> 30

|    |                 |                 |                 |
|----|-----------------|-----------------|-----------------|
| O  | -2.106244700193 | -1.444722516062 | -1.895546116913 |
| O  | 2.380833019674  | -1.765754578551 | 1.056424844049  |
| O  | 2.803955300798  | 0.908888361110  | 0.040781802723  |
| O  | 2.820307847666  | 1.574551762244  | -2.838580303267 |
| O  | -2.713198548884 | -4.495130594605 | -3.843089491183 |
| O  | 0.457712681467  | -0.456055162272 | -0.909897219022 |
| O  | 3.005980717137  | -1.444721444100 | -1.895636796670 |
| O  | 7.493070752171  | -1.765790186247 | 1.056496024677  |
| O  | 7.916171094544  | 0.908875579538  | 0.040878564405  |
| O  | 7.932516304118  | 1.574562074252  | -2.838466748781 |
| O  | 2.399068063103  | -4.495126990768 | -3.843128578852 |
| O  | 5.569927671261  | -0.456045697122 | -0.909879113605 |
| Ge | 7.300156697648  | -0.734561459624 | -0.432177191657 |
| Ge | 1.265469708921  | -3.123390855702 | 1.521699130617  |
| Ge | -0.369609803567 | -1.166445922025 | -2.366074556086 |
| Ge | 6.377655955761  | -3.123381965566 | 1.521795018651  |
| Ge | 2.187968478442  | -0.734554947345 | -0.432265581238 |
| Ge | 4.742626291725  | -1.166399252405 | -2.366099079139 |
| TV | 10.224432703059 | 0.000000000014  | 0.000000000002  |
| TV | 2.540524739159  | 4.372184494175  | 0.000000000007  |
| TV | -0.034749448849 | 0.003386833864  | 5.831417019260  |

# EQ-GeO<sub>2</sub> 31

|    |                 |                 |                 |
|----|-----------------|-----------------|-----------------|
| O  | -2.044944569997 | -1.315904083176 | -2.007521377513 |
| O  | 2.472245578664  | -1.772833886497 | 0.943115354152  |
| O  | 2.795682699383  | 0.977146384204  | 0.013671048783  |
| O  | 2.825530082151  | 1.678105128896  | -2.931308601517 |
| O  | -2.560092682581 | -4.439194771052 | -3.898735197213 |
| O  | 0.459703439915  | -0.427604130676 | -0.929524025116 |
| O  | 2.950942146892  | -1.315960334115 | -2.007462337048 |
| O  | 7.468228153436  | -1.772599038504 | 0.943135695260  |
| O  | 7.791680177317  | 0.977330635695  | 0.013625253206  |
| O  | 7.821550493484  | 1.678155586048  | -2.931293924775 |
| O  | 2.435787486534  | -4.439189748806 | -3.898672311747 |
| O  | 5.455695925029  | -0.427459983044 | -0.929541798681 |
| Ge | 7.199909831580  | -0.667166403133 | -0.478343612913 |
| Ge | 1.325143264093  | -3.088382892368 | 1.453974438242  |
| Ge | -0.296454964738 | -1.090136702642 | -2.448057393764 |
| Ge | 6.321156038316  | -3.088242884312 | 1.453947855602  |
| Ge | 2.203912348735  | -0.667314811323 | -0.478277785477 |
| Ge | 4.699442157186  | -1.090138127723 | -2.447980796585 |
| TV | 9.991805601595  | 0.000000000014  | 0.000000000002  |
| TV | 2.528256970337  | 4.413883099687  | 0.000000000007  |
| TV | 0.005366318149  | 0.002836612788  | 5.848946163898  |

# EQ-GeO<sub>2</sub> 32

|   |                |                |                |
|---|----------------|----------------|----------------|
| O | 3.493221324293 | 1.851531516489 | 3.466137813172 |
|---|----------------|----------------|----------------|

|    |                 |                 |                 |
|----|-----------------|-----------------|-----------------|
| O  | 5.220146046287  | -2.661571876184 | -2.868319042987 |
| O  | -4.759715695724 | 3.083952841923  | 2.055385473183  |
| O  | 0.477580102262  | 3.598034856903  | -3.625583423087 |
| O  | 8.715582307722  | 1.851063882593  | 3.465591917455  |
| O  | 10.442301244735 | -2.661273734872 | -2.869272532757 |
| O  | 0.462637757483  | 3.083985615491  | 2.055377788392  |
| O  | 5.699693088331  | 3.596974360864  | -3.624214649294 |
| O  | 13.938275631611 | 1.850743130236  | 3.465582736305  |
| O  | 15.664776583825 | -2.661305812819 | -2.869461531210 |
| O  | 5.685242243011  | 3.084024949979  | 2.055400115110  |
| O  | 10.922883840959 | 3.597935960532  | -3.625411551558 |
| Ge | 14.799124859955 | -1.139612369179 | -2.372717190235 |
| Ge | 6.997023182244  | 3.332122933825  | 0.816665612905  |
| Ge | 12.219374224807 | 3.332176462887  | 0.816220669058  |
| Ge | 4.354248927517  | -1.139760070152 | -2.372004367580 |
| Ge | 9.576739381413  | -1.139548883631 | -2.372521278441 |
| Ge | 1.774264010326  | 3.331889399337  | 0.816364468630  |
| TV | 15.667635038966 | -0.000000000000 | -0.000000000003 |
| TV | 2.650287372600  | 4.505360523460  | 0.000000000000  |
| TV | 0.019999354339  | 2.972481282447  | 4.244942278743  |

# EQ-GeO<sub>2</sub> 33

|    |                 |                 |                 |
|----|-----------------|-----------------|-----------------|
| O  | -2.904834432078 | -1.064091851256 | -2.376035296332 |
| O  | 4.158478726127  | -1.308988775927 | 1.427677871801  |
| O  | 2.302300895184  | 0.678751110468  | -0.172036912201 |
| O  | 1.604126531054  | 0.854649074147  | -2.745387609466 |
| O  | -1.709473302225 | -2.861986964066 | -3.811895957611 |
| O  | -0.285545606754 | -0.196633280580 | -1.305482787219 |
| O  | -2.205469533377 | 1.789408141793  | -2.375890698222 |
| O  | 4.857806099273  | 1.544459773247  | 1.427663286412  |
| O  | 3.001558609502  | 3.532326048904  | -0.172114814919 |
| O  | 2.303505446818  | 3.708159592680  | -2.745295110503 |
| O  | -1.010190366728 | -0.008440518158 | -3.811833071285 |
| O  | 0.413858925783  | 2.656871405587  | -1.305497078438 |
| Ge | 2.354506074192  | 2.179148650301  | -1.218546592611 |
| Ge | 4.094980041408  | -2.806092284655 | 2.478278778765  |
| Ge | -0.998914109420 | -1.528583442133 | -2.559398691831 |
| Ge | 4.794234940766  | 0.047407412438  | 2.478378034107  |
| Ge | 1.655018655051  | -0.674391240107 | -1.218504260038 |
| Ge | -0.299577850570 | 1.324951229461  | -2.559328607454 |
| TV | 6.153075897934  | 0.000000000007  | 0.000000000001  |
| TV | 1.398650313349  | 5.707031798465  | 0.000000000012  |
| TV | 1.591234900684  | -0.433248161737 | 6.381607266345  |

# EQ-GeO<sub>2</sub> 34

|   |                 |                 |                 |
|---|-----------------|-----------------|-----------------|
| O | 2.782717901486  | 2.299274944857  | 0.526129147442  |
| O | 2.558586017664  | -1.304523677349 | -3.158592598411 |
| O | -1.765136781837 | 0.353679670615  | 2.383965167466  |
| O | 1.496950231873  | 3.989432149506  | -1.313163282527 |
| O | 5.805870769569  | 2.299151497810  | 0.526180727780  |
| O | 5.581692941872  | -1.304368847893 | -3.158638153780 |
| O | 1.257867425655  | 0.353712798620  | 2.384220684794  |
| O | 4.520180067877  | 3.989424620916  | -1.313164040071 |
| O | 8.828772281610  | 2.298788690006  | 0.526319906722  |
| O | 8.604724895380  | -1.304431456869 | -3.158663627062 |
| O | 4.280933374371  | 0.353781760835  | 2.384074479738  |
| O | 7.543022606699  | 3.989506770111  | -1.313275881426 |

|    |                 |                 |                 |
|----|-----------------|-----------------|-----------------|
| Ge | 8.828705855293  | -0.669886338781 | -1.310227041902 |
| Ge | 4.282383216040  | 3.338684726014  | 0.531872405987  |
| Ge | 7.305447455686  | 3.338689404134  | 0.531861104959  |
| Ge | 2.782582192533  | -0.669912476450 | -1.310216157869 |
| Ge | 5.805637727888  | -0.669859788126 | -1.310166972492 |
| Ge | 1.259173340356  | 3.338617613823  | 0.531879586752  |
| TV | 9.069150074139  | -0.000000000006 | 0.000000000003  |
| TV | 0.794813289326  | 6.410806651650  | 0.000000000001  |
| TV | -0.003386082021 | -0.008837864921 | 3.693722952638  |

# EQ-GeO<sub>2</sub> 35

|    |                 |                 |                 |
|----|-----------------|-----------------|-----------------|
| O  | 3.287639058946  | 3.355495708969  | 1.839739826572  |
| O  | 2.926224668731  | -2.847452515194 | -4.004660735642 |
| O  | -1.616132346697 | 1.543801857914  | 0.300776395819  |
| O  | 0.689580127238  | 3.331616796108  | 0.610927847204  |
| O  | 4.711508326050  | 5.202978369092  | 4.914972081580  |
| O  | 4.349919077054  | -0.999843957259 | -0.929278352256 |
| O  | -0.192414223485 | 3.391090860207  | 3.375943306388  |
| O  | 2.113369518813  | 5.178995655964  | 3.686040641370  |
| O  | 6.135202009134  | 7.050455296209  | 7.990226337954  |
| O  | 5.773569942585  | 0.847495096749  | 2.145923957354  |
| O  | 1.231406329100  | 5.238723130432  | 6.451219634387  |
| O  | 3.537078960654  | 7.026518206570  | 6.761293477949  |
| Ge | 6.334847700983  | 4.218785409770  | 4.750938708809  |
| Ge | 3.797106095213  | 4.714889352499  | 3.207372965441  |
| Ge | 5.220816494989  | 6.562403181179  | 6.282642456470  |
| Ge | 3.487464277766  | 0.523935311751  | -1.399541944630 |
| Ge | 4.911045668769  | 2.371250348552  | 1.675690266147  |
| Ge | 2.373294275368  | 2.867516702619  | 0.132170370306  |
| TV | 5.345081371622  | -0.000000000001 | 0.000000000002  |
| TV | 4.034454727588  | 5.190380250986  | 0.000000000003  |
| TV | 4.271077502177  | 5.542401933249  | 9.225754746988  |

# EQ-GeO<sub>2</sub> 36

|    |                 |                 |                 |
|----|-----------------|-----------------|-----------------|
| O  | -1.392277653671 | -0.847036940168 | -0.719531194521 |
| O  | 2.959822270223  | -1.599180827665 | 0.758005705470  |
| O  | 3.207129089534  | 1.241446318074  | -0.683472800284 |
| O  | 4.506776497086  | 3.349788884455  | -2.194071130672 |
| O  | -5.029682920401 | -4.598998307498 | -2.198903686230 |
| O  | 1.052130895524  | -0.328326722284 | -0.728865402010 |
| O  | -1.379803728212 | -0.831880253885 | 2.231329724661  |
| O  | 2.972322318272  | -1.583997032180 | 3.708870332788  |
| O  | 3.219624807444  | 1.256600139412  | 2.267390025785  |
| O  | 4.519211064234  | 3.364959911285  | 0.756811370578  |
| O  | -5.017225126980 | -4.583830731594 | 0.751932108860  |
| O  | 1.064609787973  | -0.313160354009 | 2.221989985966  |
| Ge | 3.087195262308  | -0.560422380111 | 2.227403845297  |
| Ge | 0.421343825848  | -3.814818673482 | -0.719080693842 |
| Ge | -0.172094092893 | -0.611413785679 | -2.200211277732 |
| Ge | 0.433844152066  | -3.799678163541 | 2.231780678893  |
| Ge | 3.074724768372  | -0.575582089492 | -0.723448674003 |
| Ge | -0.159620739200 | -0.596243949195 | 0.750651073046  |
| TV | 6.480482955679  | 0.000000000006  | 0.000000000000  |
| TV | 4.386702698293  | 5.930389388167  | 0.000000000009  |
| TV | 0.024946142302  | 0.030331785032  | 5.901714830566  |

# EQ-GeO<sub>2</sub> 37

|    |                 |                 |                 |
|----|-----------------|-----------------|-----------------|
| O  | -2.110359442910 | -1.412621256046 | -2.016154287908 |
| O  | 2.725869216263  | -1.201937633004 | 1.192105272761  |
| O  | 2.908783845842  | 0.829917757348  | -0.131538789435 |
| O  | 1.897487073061  | 1.163416464418  | -2.949983885220 |
| O  | -2.048721575622 | -3.498206220219 | -3.973116622719 |
| O  | 0.434236262326  | -0.289277989194 | -0.987602994247 |
| O  | -0.650253851286 | 2.210276624440  | -2.016108727180 |
| O  | 4.185924545720  | 2.420981894775  | 1.192103630944  |
| O  | 4.368783358633  | 4.452834443361  | -0.131537476886 |
| O  | 3.357537169474  | 4.786335031402  | -2.950007869986 |
| O  | -0.588673333043 | 0.124698766938  | -3.973122887867 |
| O  | 1.894332750276  | 3.333668570363  | -0.987627120862 |
| Ge | 3.561294036484  | 2.710813581140  | -0.564466673260 |
| Ge | 2.091120271121  | -3.012216249540 | 1.628494244950  |
| Ge | -0.415680381694 | -0.916655277230 | -2.480357077858 |
| Ge | 3.551169466888  | 0.610693931805  | 1.628502121869  |
| Ge | 2.101231810725  | -0.912097012495 | -0.564472839181 |
| Ge | 1.044396984957  | 2.706261936168  | -2.480357534952 |
| TV | 5.183938884940  | 0.000000000007  | 0.000000000001  |
| TV | 2.920094478179  | 7.245818989292  | 0.000000000012  |
| TV | 0.587969567228  | -0.229461890299 | 6.015577688712  |

# EQ-GeO<sub>2</sub> 38

|    |                 |                 |                 |
|----|-----------------|-----------------|-----------------|
| O  | -2.717170706620 | -1.605589053762 | -1.756950689059 |
| O  | 2.251256929670  | -0.812857042623 | 0.594322777105  |
| O  | 4.343004478373  | 0.836984297499  | -0.587564940513 |
| O  | 1.843726575526  | 0.809320430177  | -1.836669077415 |
| O  | -3.161060149694 | -4.376266916289 | -2.903875130446 |
| O  | -0.213658624529 | -1.579492129344 | -0.479382211197 |
| O  | -1.546054000711 | -0.603020000204 | 1.767445574785  |
| O  | 3.421075085913  | 0.189045255141  | 4.117022263562  |
| O  | 5.515994420483  | 1.836574166851  | 2.938218035192  |
| O  | 3.013462369795  | 1.810815201027  | 1.685970561169  |
| O  | -1.992606667073 | -3.374570674537 | 0.617445500567  |
| O  | 0.959634604385  | -0.578882441069 | 3.042496010593  |
| Ge | 3.744172761465  | 1.973325838232  | 3.493494637400  |
| Ge | 3.029226994442  | -2.329099206551 | -0.227265263451 |
| Ge | -0.940906299071 | -1.742792521872 | -2.292146230178 |
| Ge | 4.200251844063  | -1.327064609415 | 3.297017025770  |
| Ge | 2.572610887345  | 0.972250175265  | -0.029075500999 |
| Ge | 0.229258651591  | -0.741047191862 | 1.230812051794  |
| TV | 6.352179104471  | 0.000000000006  | 0.000000000001  |
| TV | 2.546795570632  | 4.421869722588  | 0.000000000007  |
| TV | 2.339419817232  | 2.003847562729  | 7.045250214393  |

# EQ-GeO<sub>2</sub> 39

|   |                 |                 |                 |
|---|-----------------|-----------------|-----------------|
| O | 3.525435638018  | 2.742042193476  | 1.019906122711  |
| O | 3.899657978763  | -1.487318167688 | -3.343806459011 |
| O | -4.111096481972 | 1.532450069482  | 1.632735458555  |
| O | 1.413051340449  | 2.627900506391  | -0.993885223260 |
| O | 3.564094830219  | 4.342803652069  | 4.592712473212  |
| O | 3.971167577120  | 0.079768700756  | 0.156837262394  |
| O | -4.072469655627 | 3.099609593992  | 5.110087934608  |
| O | 1.490776868309  | 4.207653874558  | 2.510751367370  |
| O | 3.625014020891  | 5.891864287157  | 8.069603025485  |
| O | 3.990214672861  | 1.661593213834  | 3.667931474726  |
| O | -4.011333240409 | 4.656958592240  | 8.606759265292  |

|    |                |                 |                 |
|----|----------------|-----------------|-----------------|
| O  | 1.510854872507 | 5.785454249584  | 6.024703291923  |
| Ge | 4.310834302147 | 2.832240880102  | 5.253978629473  |
| Ge | 1.767668819858 | 4.608430739651  | 4.443468358669  |
| Ge | 1.829792342047 | 6.169287775906  | 7.954538280470  |
| Ge | 4.209815131892 | -0.319587668780 | -1.773963182063 |
| Ge | 4.271948977946 | 1.256220091712  | 1.740081240418  |
| Ge | 1.729190949943 | 3.024414836971  | 0.925576384230  |
| TV | 5.089776408136 | -0.000000000000 | 0.000000000000  |
| TV | 2.586461521163 | 4.668423642234  | 0.000000000000  |
| TV | 0.162937391999 | 4.713094939580  | 10.538172670668 |

# EQ-GeO<sub>2</sub> 40

|    |                 |                 |                 |
|----|-----------------|-----------------|-----------------|
| O  | -1.696326214720 | -1.291968862864 | -1.468092247549 |
| O  | 3.265256913206  | -0.388816102202 | 1.182499353939  |
| O  | 4.265307814886  | 1.113885960070  | -0.953202234039 |
| O  | 1.569457476004  | 0.681453027419  | -2.180459979406 |
| O  | -5.266378248794 | -4.710036445636 | -3.726559342809 |
| O  | 0.879486463463  | -1.035744240467 | -0.292305791464 |
| O  | 3.445244639522  | -1.291962061998 | -1.468085360776 |
| O  | 8.406786899663  | -0.388912692438 | 1.182544199918  |
| O  | 9.406859393819  | 1.113885822006  | -0.953166753534 |
| O  | 6.711036418981  | 0.681456728748  | -2.180435193151 |
| O  | -0.124750843628 | -4.709986931631 | -3.726498878865 |
| O  | 6.021050092650  | -1.035718259202 | -0.292247653432 |
| Ge | 7.722221687341  | -0.024908723193 | -0.478990573279 |
| Ge | 0.793610541744  | -2.788490153872 | 0.351483391161  |
| Ge | -0.104883022372 | -0.503646986066 | -1.931283617636 |
| Ge | 5.935171889177  | -2.788475146895 | 0.351493265705  |
| Ge | 2.580655880219  | -0.024884856208 | -0.479031626613 |
| Ge | 5.036707732342  | -0.503658609953 | -1.931264421797 |
| TV | 10.283162975742 | 0.000000000012  | 0.000000000002  |
| TV | 4.341784763752  | 4.870879129807  | 0.000000000007  |
| TV | 2.693733088882  | 1.434667707265  | 4.180189339330  |

# EQ-GeO<sub>2</sub> 41

|    |                 |                 |                 |
|----|-----------------|-----------------|-----------------|
| O  | -1.400605933020 | -3.766850833519 | -1.830210184865 |
| O  | 0.299150560192  | 1.374274894713  | 1.368303593430  |
| O  | 3.056488132515  | 2.276204826557  | 0.798531199682  |
| O  | 2.054260240545  | 2.896936317356  | -2.753867483130 |
| O  | -2.166195282709 | -6.482171954714 | -2.751750949098 |
| O  | -0.004038807248 | -1.632476888948 | -0.255789679194 |
| O  | 4.098686857615  | -3.778667439689 | -1.832727440157 |
| O  | 5.794079925652  | 1.368965135204  | 1.357365311514  |
| O  | 8.553877933927  | 2.274044283206  | 0.797489397525  |
| O  | 7.547412037503  | 2.893931833378  | -2.765261106741 |
| O  | 3.327849789802  | -6.489808791182 | -2.760277238669 |
| O  | 5.493245717920  | -1.638257648134 | -0.266607749952 |
| Ge | 6.865217632530  | 2.833840358299  | 1.134146447643  |
| Ge | 4.031159861577  | -4.903555616126 | -3.275033378909 |
| Ge | -0.362320102447 | -2.274100112074 | -1.911741040703 |
| Ge | 9.527367181563  | -4.895604294742 | -3.269390099368 |
| Ge | 1.370245200946  | 2.838750182096  | 1.143411273385  |
| Ge | 5.131639188418  | -2.282169663215 | -1.920194335867 |
| TV | 10.993159177849 | 0.000000000018  | 0.000000000020  |
| TV | 0.828614046800  | 5.500922733256  | 0.000000000012  |
| TV | -0.712323403980 | 1.008517670407  | 5.372203343778  |

# EQ-GeO<sub>2</sub> 42

|    |                 |                 |                 |
|----|-----------------|-----------------|-----------------|
| O  | -1.775645857157 | 0.667202233194  | -2.215146348082 |
| O  | 1.134980495718  | -5.287552299750 | 0.932708451741  |
| O  | 2.699905279010  | 1.890152947235  | 0.480506446568  |
| O  | 3.286565015738  | 3.590315141817  | -1.871756546143 |
| O  | -3.533991038636 | -6.031205596187 | -3.664204041538 |
| O  | 0.808114096971  | 1.851967036269  | -1.537596642296 |
| O  | 3.502923241113  | 0.667360679635  | -2.214682174421 |
| O  | 6.412814020759  | -5.287553392001 | 0.932133112595  |
| O  | 7.979468049329  | 1.888890771269  | 0.481660994104  |
| O  | 8.566427480849  | 3.589856936158  | -1.870749676074 |
| O  | 1.744546631861  | -6.030191094810 | -3.662777817078 |
| O  | 6.086045125397  | 1.851897887420  | -1.534932620932 |
| Ge | 7.880613273740  | 1.984715632646  | -1.325253508522 |
| Ge | 1.383592449804  | -6.593643367867 | 2.185310774343  |
| Ge | -0.325559436778 | -1.880813234389 | -3.605922122706 |
| Ge | 6.659765194621  | -6.594660935940 | 2.183841977509  |
| Ge | 2.602286555451  | 1.984593089529  | -1.326647725486 |
| Ge | 4.953930024596  | -1.880365218189 | -3.604874756133 |
| TV | 10.554783861018 | 0.000000000012  | 0.000000000006  |
| TV | 4.136819516374  | 5.723637007439  | 0.000000000005  |
| TV | 0.398781487654  | -2.028988436830 | 5.095502710165  |

# EQ-GeO<sub>2</sub> 43

|    |                 |                 |                 |
|----|-----------------|-----------------|-----------------|
| O  | -1.741059068088 | -0.695560361568 | -1.554157722189 |
| O  | 2.775719479725  | -0.513700005103 | 0.631914087594  |
| O  | 4.066899106833  | 1.978847419431  | -0.436157071382 |
| O  | 2.666859728270  | 0.971708712070  | -2.834505797658 |
| O  | -4.524099691350 | -6.361114361183 | -3.837874520075 |
| O  | 1.332643088225  | -0.723138659742 | -1.459423897293 |
| O  | -0.146112153213 | 2.675609698932  | 2.004483198069  |
| O  | 4.371950380727  | 2.858399408091  | 4.190718315509  |
| O  | 5.663123083621  | 5.350842841553  | 3.122864330167  |
| O  | 4.263091653030  | 4.343910114632  | 0.724475230446  |
| O  | -2.927851252392 | -2.988749162869 | -0.278968179991 |
| O  | 2.927992748306  | 2.649233188797  | 2.099700350447  |
| Ge | 4.330169186958  | 3.903844627116  | 2.588116430622  |
| Ge | 1.305169372517  | -1.893483264653 | 0.088710742168  |
| Ge | -1.612444269025 | -1.683957202539 | 0.193836074449  |
| Ge | 2.901348305943  | 1.478608795739  | 3.647694492565  |
| Ge | 2.734305794956  | 0.531839646154  | -0.970776292872 |
| Ge | -0.016202517339 | 1.688085368529  | 3.752847538035  |
| TV | 5.848392328488  | 0.000000000006  | 0.000000000001  |
| TV | 4.393097150499  | 4.908144448578  | 0.000000000007  |
| TV | 3.192436915833  | 6.744348347117  | 7.117978117711  |

# EQ-GeO<sub>2</sub> 44

|   |                 |                 |                 |
|---|-----------------|-----------------|-----------------|
| O | -2.184317705152 | -0.851229828735 | -2.024436969410 |
| O | 2.491383312982  | -1.150852712902 | 1.000888552901  |
| O | 3.679316686792  | 1.038205979083  | -0.274641591889 |
| O | 1.684974416916  | 1.314710002460  | -2.072765997119 |
| O | -2.997567131912 | -4.700431302028 | -3.661614623280 |
| O | 0.515176418790  | -0.902167513730 | -0.800038402506 |
| O | -0.559100287737 | 0.260231282723  | 2.586164996534  |
| O | 4.116597953139  | -0.039592440735 | 5.611506430891  |
| O | 5.304371901299  | 2.149622323266  | 4.335995335219  |
| O | 3.310288781588  | 2.426139988560  | 2.537841277890  |

|    |                 |                 |                 |
|----|-----------------|-----------------|-----------------|
| O  | -1.372367400999 | -3.588991384008 | 0.949020260053  |
| O  | 2.140273444593  | 0.209136046614  | 3.810621702027  |
| Ge | 3.713849862558  | 1.192980135680  | 4.073658328166  |
| Ge | 1.987989439151  | -2.997053470487 | 1.186344029005  |
| Ge | -0.343364724060 | -1.444110472350 | -2.261504647661 |
| Ge | 3.613082651315  | -1.885700907553 | 5.796959186415  |
| Ge | 2.088745196502  | 0.081631143553  | -0.536970636588 |
| Ge | 1.281772210079  | -0.332670075095 | 2.349102000890  |
| TV | 5.205327502344  | 0.000000000006  | 0.000000000001  |
| TV | 2.531892455674  | 4.606022001645  | 0.000000000007  |
| TV | 3.250322413681  | 2.222854230905  | 9.221224320128  |

# EQ-GeO<sub>2</sub> 45

|    |                 |                 |                 |
|----|-----------------|-----------------|-----------------|
| O  | 2.693862677700  | 4.135406665178  | 4.899872825869  |
| O  | 7.658797535975  | -7.618760013658 | -5.121983811495 |
| O  | -4.868903713427 | 2.375649436906  | 0.488221777841  |
| O  | 0.212056007388  | 3.562289003919  | -2.309612179568 |
| O  | 2.709698734413  | 5.986010069357  | 7.301900962742  |
| O  | 7.680765404460  | -5.775252131022 | -2.730163260273 |
| O  | -4.854119505608 | 4.233324063291  | 2.895724030141  |
| O  | 0.215747226720  | 5.404168228412  | 0.090707359575  |
| O  | 2.737903565217  | 7.831840515996  | 9.695001166814  |
| O  | 7.706909398523  | -3.908116192930 | -0.312399536178 |
| O  | -4.833223217242 | 6.100940062053  | 5.314091704872  |
| O  | 0.245200343076  | 7.256547224608  | 2.486255388793  |
| Ge | 3.119228363543  | 5.808071575089  | 5.521983043272  |
| Ge | 0.661702464045  | 5.588742005291  | 1.856858561365  |
| Ge | 0.683144562186  | 7.440537141861  | 4.254873064848  |
| Ge | 3.083791956621  | 2.108097298072  | 0.723493602383  |
| Ge | 3.097583576249  | 3.957147855074  | 3.119952746208  |
| Ge | 0.646478968604  | 3.739606038927  | -0.539589721007 |
| TV | 4.870854843864  | -0.000000000002 | 0.000000000001  |
| TV | -0.395666127852 | 7.371378797237  | 0.000000000002  |
| TV | 0.062244462784  | 5.549519839556  | 7.192812323406  |

# EQ-GeO<sub>2</sub> 46

|    |                 |                 |                 |
|----|-----------------|-----------------|-----------------|
| O  | 2.923901976993  | 2.314026504249  | 0.938822771752  |
| O  | 2.945337862790  | -1.017288744211 | -3.817260654750 |
| O  | -1.565560221603 | 0.586697636027  | 3.231447816321  |
| O  | 1.404375044413  | 3.518396931313  | -1.322521471463 |
| O  | 5.946037830925  | 2.314087470702  | 0.938902399991  |
| O  | 5.967498808056  | -1.017263838189 | -3.817242925128 |
| O  | 1.456592766864  | 0.586686717595  | 3.231447563749  |
| O  | 4.426539984336  | 3.518388772483  | -1.322543481939 |
| O  | 8.968196842079  | 2.314104185011  | 0.938896553537  |
| O  | 8.989652787275  | -1.017277439445 | -3.817240340548 |
| O  | 4.478737955740  | 0.586635208027  | 3.231492704637  |
| O  | 7.448654678037  | 3.518379566820  | -1.322519062761 |
| Ge | 8.986600052091  | -0.582922467863 | -2.042374546320 |
| Ge | 4.434328173236  | 3.244857779637  | 0.482870308809  |
| Ge | 7.456476020539  | 3.244876546879  | 0.482903185844  |
| Ge | 2.942290989305  | -0.582942958219 | -2.042389456548 |
| Ge | 5.964452233475  | -0.582939746108 | -2.042368864202 |
| Ge | 1.412190487854  | 3.244861039500  | 0.482898526117  |
| TV | 9.066456585255  | 0.000000000000  | 0.000000000000  |
| TV | 1.471231307919  | 5.778054978646  | 0.000000000000  |
| TV | 0.025391874111  | 0.213079025299  | 4.880379155150  |



# EQ-GeO<sub>2</sub> 47

|    |                 |                 |                 |
|----|-----------------|-----------------|-----------------|
| O  | 3.576676761729  | 2.448309754264  | 0.959819858258  |
| O  | 3.761111773689  | -1.269698841538 | -2.776033335927 |
| O  | -3.755145674901 | 1.136763226775  | 1.278438063915  |
| O  | 1.349020008422  | 3.313834757814  | -0.844778264695 |
| O  | 3.603639997629  | 3.218396700149  | 3.884805653385  |
| O  | 3.787879878510  | -0.499561748704 | 0.149010957058  |
| O  | -3.728200527806 | 1.906918552075  | 4.203422701143  |
| O  | 1.375922588356  | 4.083979781444  | 2.080269893948  |
| O  | 3.630444953130  | 3.988662558507  | 6.809893323927  |
| O  | 3.814898086743  | 0.270576544755  | 3.074031370978  |
| O  | -3.701415895862 | 2.677088851431  | 7.128531895463  |
| O  | 1.402819413109  | 4.854100116279  | 5.005291061258  |
| Ge | 4.254564284103  | 1.564329454767  | 4.292799790125  |
| Ge | 1.812022119710  | 3.555916222844  | 3.779265019955  |
| Ge | 1.838820167714  | 4.326077287056  | 6.704322552517  |
| Ge | 4.200733483520  | 0.024060425454  | -1.557263990982 |
| Ge | 4.227629677874  | 0.794216167742  | 1.367744834008  |
| Ge | 1.785051812450  | 2.785768713822  | 0.854236073179  |
| TV | 4.887300858735  | -0.000000000000 | 0.000000000000  |
| TV | 0.076878045719  | 6.053949994240  | -0.000000000000 |
| TV | 0.080622821600  | 2.310467212678  | 8.775105818013  |

# EQ-GeO<sub>2</sub> 48

|    |                 |                 |                 |
|----|-----------------|-----------------|-----------------|
| O  | -2.146652171269 | -0.908258414756 | -1.616392045809 |
| O  | 2.535394652830  | -0.614687182795 | 1.074980510913  |
| O  | 3.809041285240  | 1.663914751680  | -0.546597264030 |
| O  | 1.903276226434  | 1.435523905098  | -2.213909463369 |
| O  | -4.647977853586 | -4.725695671233 | -3.957201571530 |
| O  | 0.636573329842  | -0.868599290602 | -0.589462402408 |
| O  | 3.053403195627  | -0.908035601601 | -1.616070766323 |
| O  | 7.735683082313  | -0.614034960359 | 1.073816929997  |
| O  | 9.008957698069  | 1.664536149930  | -0.547819807903 |
| O  | 7.103189700335  | 1.436923776083  | -2.214975338250 |
| O  | 0.551556429552  | -4.725705041316 | -3.957460336933 |
| O  | 5.836294839522  | -0.867889299398 | -0.590014573169 |
| Ge | 7.416507078672  | 0.400994039520  | -0.569189353685 |
| Ge | 1.350465781625  | -2.289947461939 | 0.500844050183  |
| Ge | -0.642232712902 | -1.881031784753 | -1.635040236451 |
| Ge | 6.550356893265  | -2.289191541871 | 0.500006097240  |
| Ge | 2.216638655597  | 0.400035015413  | -0.568128031992 |
| Ge | 4.558258039010  | -1.880089057148 | -1.636294955695 |
| TV | 10.399074387262 | 0.000000000012  | 0.000000000002  |
| TV | 3.719597677147  | 4.966798930103  | 0.000000000007  |
| TV | 2.355556699892  | 1.555434790637  | 4.360976343254  |

# EQ-GeO<sub>2</sub> 49

|   |                 |                  |                 |
|---|-----------------|------------------|-----------------|
| O | 0.939853111954  | 3.991333656050   | 2.452551866846  |
| O | 9.266207477838  | -11.194531740455 | -4.687369419958 |
| O | -6.185948565270 | 3.966432352170   | 0.467751109395  |
| O | 1.188303879025  | 4.981742197233   | -0.435596107316 |
| O | 0.966316501315  | 5.990330248425   | 4.712961508677  |
| O | 9.292654458056  | -9.195570904522  | -2.426993996166 |
| O | -6.159403252475 | 5.965371500269   | 2.728128153704  |
| O | 1.214776007217  | 6.980753333156   | 1.824808793875  |
| O | 0.992758106819  | 7.989278452291   | 6.973318841700  |

|    |                 |                 |                 |
|----|-----------------|-----------------|-----------------|
| O  | 9.319144862142  | -7.196597151091 | -0.166603655460 |
| O  | -6.133038131915 | 7.964358909229  | 4.988509041677  |
| O  | 1.241223319780  | 8.979683375748  | 4.085175114652  |
| Ge | 3.038748171520  | 9.233849310542  | 3.859418940884  |
| Ge | 0.553862421613  | 5.709705959913  | 2.952138946728  |
| Ge | 0.580228189366  | 7.708688213126  | 5.212510231467  |
| Ge | 2.985824849906  | 5.235906200027  | -0.661339894127 |
| Ge | 3.012328341915  | 7.234862612350  | 1.599058872324  |
| Ge | 0.527321468986  | 3.710749607482  | 0.691740524874  |
| TV | 4.915410903594  | -0.000000000004 | 0.000000000001  |
| TV | -1.001938713017 | 14.144708060017 | -0.000000000000 |
| TV | 0.079449339007  | 5.996906343542  | 6.781150055292  |

# EQ-GeO<sub>2</sub> 50

|    |                 |                 |                 |
|----|-----------------|-----------------|-----------------|
| O  | -6.576312583512 | -0.917731936593 | -1.895908422544 |
| O  | 3.557793779091  | -0.822829199415 | 0.465982835271  |
| O  | 6.772473738053  | -0.301330849776 | -0.166095358067 |
| O  | 1.721962115091  | -0.205924019968 | -1.274307699516 |
| O  | -4.277650969571 | -3.196535237719 | -2.380069465865 |
| O  | -1.476378956277 | -0.904791454523 | -0.642868641322 |
| O  | -7.067677544526 | -2.371091499754 | 0.636687982250  |
| O  | 3.066408318354  | -2.276152972991 | 2.998637908641  |
| O  | 6.280989135177  | -1.754700876009 | 2.366500818985  |
| O  | 1.230582513140  | -1.659269014865 | 1.258283364338  |
| O  | -4.769043998536 | -4.649944106977 | 0.152560664446  |
| O  | -1.967698736903 | -2.358065286625 | 1.889714124872  |
| Ge | 2.631866356418  | -0.516155262340 | 2.127510703457  |
| Ge | 7.211670884932  | -2.063961924067 | -1.031357659849 |
| Ge | -2.877766744948 | -2.052982196546 | -1.512812526381 |
| Ge | 6.720222724601  | -3.517258253970 | 1.501247303499  |
| Ge | 3.123239997505  | 0.937189690871  | -0.405095127533 |
| Ge | -3.369140254218 | -3.506382657719 | 1.019807435687  |
| TV | 15.195474389708 | 0.000000000007  | 0.000000000001  |
| TV | 0.967636213242  | 2.906097592337  | 0.000000000007  |
| TV | -0.982749414154 | -2.906668974295 | 5.065176921294  |

# EQ-GeO<sub>2</sub> 51

|    |                 |                 |                 |
|----|-----------------|-----------------|-----------------|
| O  | -2.548571498286 | -2.639387270920 | -1.035148998830 |
| O  | 2.730649892024  | -0.794903789240 | -0.161754831930 |
| O  | 3.816704556278  | 1.485801757546  | -1.611138811858 |
| O  | 1.107032604341  | 1.169431013075  | -1.828213070791 |
| O  | -2.620058753524 | -5.470123906694 | -2.407325300225 |
| O  | 0.312238752272  | -2.014657652448 | -0.281049743108 |
| O  | -0.916928008491 | -0.480294491024 | 1.807474360367  |
| O  | 4.327501132274  | 0.100957450547  | 3.187273410272  |
| O  | 5.831155389402  | 2.613068151661  | 1.879180421707  |
| O  | 3.877586587321  | 1.619688004937  | 0.862809970054  |
| O  | -0.218822967173 | -4.172062127909 | 0.896541030294  |
| O  | 1.815688839421  | -1.412375919171 | 2.485897340863  |
| Ge | 3.780705759688  | 1.897692696372  | 2.814244928046  |
| Ge | 3.828218587441  | -2.205936783880 | 0.139278082572  |
| Ge | -0.951240766355 | -2.102133543170 | -1.838324633509 |
| Ge | 5.510972333983  | -1.261417927081 | 2.842049243287  |
| Ge | 2.439244561996  | 1.141418195647  | -0.360105016845 |
| Ge | 0.739737393757  | -0.836215707706 | 1.090690080694  |
| TV | 7.631252373654  | 0.000000000006  | 0.000000000001  |
| TV | 1.322411487093  | 5.081057533948  | 0.000000000007  |

|                          |                 |                 |                 |
|--------------------------|-----------------|-----------------|-----------------|
| TV                       | 3.519080047030  | 1.700548675787  | 6.075643088623  |
| # EQ-GeO <sub>2</sub> 52 |                 |                 |                 |
| O                        | -1.219446100467 | -1.935593730351 | -2.922380386092 |
| O                        | -1.399772777418 | -5.444078196470 | 6.009425397034  |
| O                        | 2.964238372326  | 3.659026817771  | -0.744856905386 |
| O                        | 4.853072233397  | 4.143758395098  | -2.926096106647 |
| O                        | -3.239199186750 | -7.454270529989 | -3.233674245332 |
| O                        | 0.688760183274  | -1.452324487587 | -0.751877668984 |
| O                        | 2.626515616627  | -1.935670919163 | -2.922405431215 |
| O                        | 2.446221241539  | -5.444054105230 | 6.009645331669  |
| O                        | 6.810330034585  | 3.658868068492  | -0.744902415751 |
| O                        | 8.699145094703  | 4.143842484502  | -2.926165477725 |
| O                        | 0.606771061659  | -7.454253018938 | -3.233731361280 |
| O                        | 4.534766555496  | -1.452382955578 | -0.751919299296 |
| Ge                       | 6.794272749832  | 3.752905437276  | -2.576798503109 |
| Ge                       | -0.253150094496 | -2.672473222367 | 0.230982433497  |
| Ge                       | 0.687250635272  | -1.545114440998 | -2.581501591928 |
| Ge                       | 3.592949884949  | -2.672626839383 | 0.230917725873  |
| Ge                       | 2.948222671074  | 3.752982963320  | -2.576719519629 |
| Ge                       | 4.533265494627  | -1.545070254655 | -2.581545439200 |
| TV                       | 7.692053230269  | 0.000000000032  | 0.000000000010  |
| TV                       | 4.136225496518  | 7.577448495692  | 0.000000000013  |
| TV                       | 0.153535371409  | 3.806771106818  | 4.630727132413  |

|                          |                 |                 |                 |
|--------------------------|-----------------|-----------------|-----------------|
| # EQ-GeO <sub>2</sub> 53 |                 |                 |                 |
| O                        | -2.205064678137 | -1.348850856141 | -1.992437923891 |
| O                        | 2.790345835306  | -1.304566358324 | 0.771899707653  |
| O                        | 3.893323672475  | 0.876492688433  | -0.766309396436 |
| O                        | 1.734852564338  | 1.123644310845  | -2.343687676348 |
| O                        | -3.104348716818 | -3.782999673375 | -4.189682145830 |
| O                        | 0.625620625442  | -1.049026281860 | -0.803642056465 |
| O                        | -0.120770337765 | 3.303291737215  | -1.992536992271 |
| O                        | 4.874967084334  | 3.347669603666  | 0.771694149733  |
| O                        | 5.977150717413  | 5.529373862060  | -0.765990883555 |
| O                        | 3.819105389001  | 5.776112324104  | -2.343480241850 |
| O                        | -1.019319110185 | 0.869706156301  | -4.189412907763 |
| O                        | 2.709849989443  | 3.603617877433  | -0.804242432389 |
| Ge                       | 4.346627137197  | 4.560220766345  | -0.782577567287 |
| Ge                       | 2.875320994809  | -3.234323011106 | 0.535768465436  |
| Ge                       | -0.436496739208 | -1.600123687841 | -2.107403817398 |
| Ge                       | 4.960261857344  | 1.417975974955  | 0.535641438527  |
| Ge                       | 2.262280917228  | -0.091973740523 | -0.782378353516 |
| Ge                       | 1.647830337978  | 3.052201225031  | -2.107810808678 |
| TV                       | 5.250213447303  | 0.000000000007  | 0.000000000001  |
| TV                       | 4.169223951648  | 9.304738960546  | 0.000000000014  |
| TV                       | 2.497396217674  | 0.287377204563  | 4.625438454008  |

|                          |                 |                 |                 |
|--------------------------|-----------------|-----------------|-----------------|
| # EQ-GeO <sub>2</sub> 54 |                 |                 |                 |
| O                        | 2.527011918534  | 4.714975019384  | 2.525150109605  |
| O                        | 6.933828552486  | -7.803607435484 | -3.760185982295 |
| O                        | -7.001354257778 | 3.655363277800  | 1.670990892602  |
| O                        | -0.854731532624 | 3.387726587527  | -1.197786678759 |
| O                        | 1.133751362068  | 6.834201276243  | 4.233330229633  |
| O                        | 5.540579748036  | -5.684453113550 | -2.051865707113 |
| O                        | -8.394667373738 | 5.774585068668  | 3.379230497396  |
| O                        | -2.248016374372 | 5.506773878268  | 0.510622816005  |

|    |                 |                 |                 |
|----|-----------------|-----------------|-----------------|
| O  | -0.259521060967 | 8.953313383973  | 5.941696057026  |
| O  | 4.147214531009  | -3.565260867439 | -0.343608775064 |
| O  | -9.787998724424 | 7.893870685703  | 5.087529080561  |
| O  | -3.641182102253 | 7.626051466341  | 2.218797319373  |
| Ge | 5.259360433072  | 3.801287383360  | 0.455874197670  |
| Ge | -0.238888633799 | 6.980094705779  | 3.018180232201  |
| Ge | -1.632145593759 | 9.099295663725  | 4.726539158788  |
| Ge | 8.045870633778  | -0.437070400329 | -2.960655256050 |
| Ge | 6.652618145029  | 1.682166622904  | -1.252464972962 |
| Ge | 1.154387877986  | 4.860910929068  | 1.309960201427  |
| TV | 6.816690662555  | -0.000000000002 | 0.000000000001  |
| TV | 4.526455089662  | 8.012498379203  | 0.000000000001  |
| TV | -4.179808128981 | 6.357614992214  | 5.124788785275  |

# EQ-GeO<sub>2</sub> 55

|    |                 |                 |                 |
|----|-----------------|-----------------|-----------------|
| O  | 2.361221625639  | 4.897270752984  | 2.239369604581  |
| O  | 4.516376063407  | -3.614299817715 | -4.610585034234 |
| O  | -4.120355813720 | 2.768863826081  | 2.239399223226  |
| O  | 2.360274670307  | 2.762512029128  | 0.162636688640  |
| O  | 6.681989673506  | 4.897264022901  | 2.239380252045  |
| O  | 8.837139607886  | -3.614292153957 | -4.610583851129 |
| O  | 0.200429368011  | 2.768881086518  | 2.239380240480  |
| O  | 6.681045508230  | 2.762493972331  | 0.162657153279  |
| O  | 11.002741815104 | 4.897266725894  | 2.239382069884  |
| O  | 13.157893950029 | -3.614290541595 | -4.610603320853 |
| O  | 4.521177043973  | 2.768876301835  | 2.239372426665  |
| O  | 11.001817064436 | 2.762493390615  | 0.162665945529  |
| Ge | 12.080883329944 | -2.546549133589 | -3.571964813516 |
| Ge | 5.604038970603  | 3.830263532169  | 1.201287064181  |
| Ge | 9.924804961866  | 3.830254101217  | 1.201292222421  |
| Ge | 3.439343397489  | -2.546536847563 | -3.571988805192 |
| Ge | 7.760116025807  | -2.546539860280 | -3.571974852896 |
| Ge | 1.283272413510  | 3.830272942545  | 1.201273242960  |
| TV | 12.962307800619 | -0.000000000007 | -0.000000000002 |
| TV | 0.000821491474  | 4.256802755224  | 0.000000000001  |
| TV | 0.003890670080  | 4.248403441998  | 4.773260408914  |

# EQ-GeO<sub>2</sub> 56

|    |                 |                 |                 |
|----|-----------------|-----------------|-----------------|
| O  | 2.654452241011  | 4.237725440708  | 1.637145553383  |
| O  | 2.650066740356  | -3.592774383675 | -3.818096145785 |
| O  | -1.908900403779 | 1.761604718667  | 0.917018640583  |
| O  | 1.130835635111  | 4.233037110456  | -0.931170394544 |
| O  | 5.694209254361  | 4.208006843362  | 1.665754505734  |
| O  | 5.689823199732  | -3.622311782522 | -3.789298113283 |
| O  | 1.134203053441  | 1.795266170289  | 0.887170881981  |
| O  | 4.180300128275  | 4.203565200200  | -0.904108474725 |
| O  | 8.733414987618  | 4.236057395034  | 1.639115585809  |
| O  | 8.729025618478  | -3.594474011970 | -3.816079746684 |
| O  | 4.183527585257  | 1.765691421766  | 0.914250203170  |
| O  | 7.204398085101  | 4.199446501930  | -0.901388241229 |
| Ge | 10.251374503014 | -1.504479751052 | -1.014694125250 |
| Ge | 4.176259699541  | 3.600077347888  | 0.830529111738  |
| Ge | 7.212293871678  | 3.596017780765  | 0.833339390645  |
| Ge | 4.175709436855  | -1.534041564847 | -0.987842599082 |
| Ge | 7.211670992940  | -1.538111746314 | -0.985002038009 |
| Ge | 1.135296082512  | 3.629738055964  | 0.803751461633  |
| TV | 9.116651082787  | -0.000000000006 | 0.000000000003  |

|    |                 |                |                |
|----|-----------------|----------------|----------------|
| TV | -0.002777375485 | 7.571983792230 | 0.000000000001 |
| TV | 0.003812242257  | 2.696323899908 | 3.636746940759 |

# EQ-GeO<sub>2</sub> 57

|    |                 |                 |                 |
|----|-----------------|-----------------|-----------------|
| O  | 4.459077517199  | 3.072110318448  | 3.407385561474  |
| O  | 1.224880593854  | -0.440984688016 | -4.985252657650 |
| O  | -0.136786479054 | 0.574376798182  | 2.804723352558  |
| O  | -1.132074415074 | 2.910797081144  | -5.588197042795 |
| O  | 7.499390014505  | 3.071780918412  | 3.407528673529  |
| O  | 4.264608915259  | -0.441119363607 | -4.984819260165 |
| O  | 2.903050862744  | 0.574611833692  | 2.804306622885  |
| O  | 1.907539384221  | 2.911132760476  | -5.588333951912 |
| O  | 10.539055270165 | 3.072079916822  | 3.407955947398  |
| O  | 7.304909848499  | -0.440388832867 | -4.984647435457 |
| O  | 5.942816137586  | 0.574483106893  | 2.804081784180  |
| O  | 4.947411479975  | 2.910677643740  | -5.587934239123 |
| Ge | 7.334703446262  | -0.811433703213 | -3.185384319442 |
| Ge | 7.528513460392  | 2.701402986717  | 5.206601654931  |
| Ge | 10.568448863047 | 2.701302571521  | 5.207142053289  |
| Ge | 1.254596781972  | -0.811325308748 | -3.186049418190 |
| Ge | 4.294795330547  | -0.811873934322 | -3.185603431295 |
| Ge | 4.488520222535  | 2.702131956486  | 5.206891561911  |
| TV | 9.119847102001  | -0.000000000007 | 0.000000000004  |
| TV | 2.239330047299  | 5.849023171894  | -0.000000000001 |
| TV | 3.169514386281  | 2.341938480986  | 5.595057996003  |

# EQ-GeO<sub>2</sub> 58

|    |                 |                 |                 |
|----|-----------------|-----------------|-----------------|
| O  | 2.851366419136  | 1.745462746106  | 0.948518281632  |
| O  | 4.490423896658  | -2.359297718331 | -1.195414047981 |
| O  | -1.702819894626 | 3.163715702571  | -1.195697665387 |
| O  | -0.186546995384 | 1.745671440990  | 0.948638266615  |
| O  | 2.862096324870  | 2.807953667427  | 3.787583093837  |
| O  | 4.501352979796  | -1.296968306316 | 1.643318220627  |
| O  | -1.692433361884 | 4.225918098833  | 1.643180613870  |
| O  | -0.175695942106 | 2.807833349971  | 3.787248674611  |
| O  | 2.872805932047  | 3.869794893103  | 6.626036809726  |
| O  | 4.512183755526  | -0.234567646534 | 4.482143068718  |
| O  | -1.681193466847 | 5.288002759917  | 4.481874826645  |
| O  | -0.165099135592 | 3.870197454324  | 6.626270730996  |
| Ge | 4.381030323284  | 3.781320656185  | 3.426944361248  |
| Ge | 1.343122214582  | 3.781497442747  | 3.427086683319  |
| Ge | 1.353837491303  | 4.843477817011  | 6.265899754050  |
| Ge | 4.359462722947  | 1.656900427672  | -2.250845724123 |
| Ge | 4.370269075931  | 2.719130037698  | 0.588168061326  |
| Ge | 1.332393447228  | 2.719035871895  | 0.588312878487  |
| TV | 6.075709168800  | -0.000000000001 | 0.000000000001  |
| TV | 2.919980091827  | 5.522703139150  | 0.000000000003  |
| TV | 0.032109294165  | 3.186633138291  | 8.516473347689  |

# EQ-GeO<sub>2</sub> 59

|   |                 |                 |                 |
|---|-----------------|-----------------|-----------------|
| O | 7.510761016888  | 5.221090062446  | 4.649313766590  |
| O | 0.853644189447  | -4.690970409675 | -4.966421425462 |
| O | -0.112995927064 | 3.687697155561  | 2.584996790213  |
| O | -0.304763153736 | 3.287049304235  | -2.223509224653 |
| O | 10.547579414039 | 5.220472202804  | 4.649036394042  |
| O | 3.890826652084  | -4.690331646184 | -4.966189356626 |
| O | 2.922870468460  | 3.687785616920  | 2.584562725497  |

|    |                 |                 |                 |
|----|-----------------|-----------------|-----------------|
| O  | 2.733245676898  | 3.287252623533  | -2.223720536375 |
| O  | 13.584363606512 | 5.221249612215  | 4.648892407818  |
| O  | 6.927520152946  | -4.690030873045 | -4.967083413044 |
| O  | 5.960872689642  | 3.687941243398  | 2.584668649883  |
| O  | 5.770043711987  | 3.287408384393  | -2.223148263613 |
| Ge | 8.704001295850  | -1.267886443679 | -1.191904806876 |
| Ge | 2.697002548672  | 1.768920745597  | -1.191836428439 |
| Ge | 5.733630011310  | 1.768885805962  | -1.191713579903 |
| Ge | 2.630180220852  | -1.267749321982 | -1.192202451634 |
| Ge | 5.667178261023  | -1.267767482151 | -1.191410712222 |
| Ge | -0.340224119884 | 1.768745481454  | -1.191935078974 |
| TV | 9.110638464934  | -0.000000000006 | 0.000000000003  |
| TV | 0.133001962790  | 6.073361100053  | -0.000000000006 |
| TV | 3.295226035463  | 3.437240205990  | 4.807950847346  |

# EQ-GeO<sub>2</sub> 60

|    |                 |                 |                 |
|----|-----------------|-----------------|-----------------|
| O  | 3.574616209359  | 3.777214870350  | 2.372376042852  |
| O  | 8.548160846728  | -6.942792393161 | -4.314550700630 |
| O  | -5.538287921106 | 1.967303969737  | 1.003268531863  |
| O  | -1.565097523705 | 1.834946623218  | -2.941816171673 |
| O  | 4.535688175810  | 5.852446130838  | 4.685637032290  |
| O  | 9.509133923091  | -4.867540268976 | -2.001347208912 |
| O  | -4.577379629973 | 4.042520302810  | 3.316484904341  |
| O  | -0.604130673990 | 3.910214769503  | -0.628579460750 |
| O  | 5.496587286031  | 7.927626255860  | 6.998852662873  |
| O  | 10.470083443708 | -2.792351968590 | 0.311891016567  |
| O  | -3.616353507409 | 6.117770613970  | 5.629782452384  |
| O  | 0.356836359379  | 5.985410060097  | 1.684643193925  |
| Ge | 5.804501052543  | 7.162876230685  | 5.268721783620  |
| Ge | 2.840126739546  | 7.009790448082  | 4.354041678538  |
| Ge | 3.801065151788  | 9.085011246122  | 6.667240619884  |
| Ge | 3.882557659095  | 3.012427827827  | 0.642259835305  |
| Ge | 4.843503309377  | 5.087663968563  | 2.955483858826  |
| Ge | 1.879133870755  | 4.934554605186  | 2.040788942566  |
| TV | 5.472386510691  | -0.000000000003 | 0.000000000002  |
| TV | -2.810633664832 | 6.963251769782  | 0.000000000001  |
| TV | 2.882868578938  | 6.225662422161  | 6.939692751525  |

# EQ-GeO<sub>2</sub> 61

|    |                 |                 |                 |
|----|-----------------|-----------------|-----------------|
| O  | 4.081867755715  | 3.885507615391  | 2.714975510577  |
| O  | 7.321290757174  | -8.326559073065 | -4.727606183890 |
| O  | -6.784812391164 | 3.188421215842  | 1.561238125455  |
| O  | 0.660942849724  | 3.915958553495  | -1.266002454089 |
| O  | 5.452674874018  | 5.280125823342  | 5.022674925180  |
| O  | 8.692032254787  | -6.932063486135 | -2.419579785059 |
| O  | -5.413976741922 | 4.583133045149  | 3.869239579748  |
| O  | 2.031512780914  | 5.310403916361  | 1.042256110394  |
| O  | 6.824103201126  | 6.674658545385  | 7.330521686262  |
| O  | 10.063348358592 | -5.537453087095 | -0.112053499433 |
| O  | -4.042692418937 | 5.977421028573  | 6.176575508166  |
| O  | 3.402902019815  | 6.704777325920  | 3.349555153574  |
| Ge | 6.796527544701  | 5.811662980790  | 3.888673306737  |
| Ge | 2.717281340997  | 5.114537397970  | 2.734796535725  |
| Ge | 4.088300235012  | 6.509287925136  | 5.042330138865  |
| Ge | 4.054686244945  | 3.022835821830  | -0.727059381086 |
| Ge | 5.425563426093  | 4.417134052024  | 1.580842342644  |
| Ge | 1.346252062804  | 3.720309151461  | 0.426796539515  |

|    |                |                 |                 |
|----|----------------|-----------------|-----------------|
| TV | 6.787655007893 | 0.000000000020  | 0.000000000020  |
| TV | 1.464692300316 | 10.150376803925 | -0.000000000047 |
| TV | 4.113126933442 | 4.183336766754  | 6.923446089333  |

# EQ-GeO<sub>2</sub> 62

|    |                 |                 |                 |
|----|-----------------|-----------------|-----------------|
| O  | -2.763750185428 | -1.860671879646 | -1.810766715788 |
| O  | 2.138436702784  | -0.893257592094 | 0.558613951623  |
| O  | 4.159046872089  | 0.358236417200  | -0.433320163548 |
| O  | 1.879236331083  | 0.790512763764  | -1.943334668256 |
| O  | -3.286074108298 | -4.389505304648 | -3.045409239400 |
| O  | -0.508378058615 | -1.571710406225 | -0.505314571581 |
| O  | -1.619970870877 | -0.837610712266 | 1.759653442359  |
| O  | 3.282166164096  | 0.129838149986  | 4.129046282147  |
| O  | 5.302790486353  | 1.381261026782  | 3.137174530457  |
| O  | 3.023002127254  | 1.813610800262  | 1.627155998475  |
| O  | -2.142299336610 | -3.366402660284 | 0.525001754632  |
| O  | 0.635366553430  | -0.548569012253 | 3.065120920058  |
| Ge | 3.582315289379  | 1.924294275819  | 3.529115162861  |
| Ge | 3.973771874187  | -1.444676416767 | 0.135888378338  |
| Ge | -0.912272473428 | -1.778447211542 | -2.430363350986 |
| Ge | 5.117492222297  | -0.421622516944 | 3.706344935044  |
| Ge | 2.438578113804  | 0.901193082770  | -0.041345907984 |
| Ge | 0.231501676365  | -0.755347475588 | 1.140089521804  |
| TV | 6.584879055556  | 0.000000000006  | 0.000000000001  |
| TV | 2.668360834267  | 4.414360745145  | 0.000000000007  |
| TV | 2.287500290837  | 2.046154388909  | 7.140882284743  |

# EQ-GeO<sub>2</sub> 63

|    |                 |                  |                 |
|----|-----------------|------------------|-----------------|
| O  | 4.024110200639  | 5.100473692601   | 4.059205046323  |
| O  | 8.261743027196  | -10.392267316812 | -3.438341202088 |
| O  | -5.141879940956 | 3.686759178667   | 2.195553846917  |
| O  | -2.098974416423 | 3.304871828284   | -4.387770542780 |
| O  | 5.005246765482  | 6.476962761326   | 6.872099021576  |
| O  | 9.242796124581  | -9.015735785874  | -0.625434114063 |
| O  | -4.160851773637 | 5.063243875068   | 5.008434577708  |
| O  | -1.117935126515 | 4.681430368043   | -1.574937107643 |
| O  | 5.986416465927  | 7.853676894665   | 9.684945957507  |
| O  | 10.224109241265 | -7.639217691477  | 2.187549097848  |
| O  | -3.179525326597 | 6.439872020498   | 7.821384524441  |
| O  | -0.136651641215 | 6.058000338167   | 1.238032417703  |
| Ge | 5.291224873605  | 6.222175075705   | 4.982150540048  |
| Ge | 2.328730378745  | 6.274468815111   | 4.076199329313  |
| Ge | 3.309846603524  | 7.651153214852   | 6.889057302797  |
| Ge | 3.328847027255  | 3.468912132875   | -0.643710283551 |
| Ge | 4.310056710885  | 4.845539248358   | 2.169256911249  |
| Ge | 1.347528344837  | 4.897971277577   | 1.263204549365  |
| TV | 5.468839278362  | -0.000000000004  | 0.000000000001  |
| TV | -2.141142814962 | 13.657680365443  | 0.000000000000  |
| TV | 2.943493729219  | 4.129698579598   | 8.438781362696  |

# EQ-GeO<sub>2</sub> 64

|   |                 |                 |                 |
|---|-----------------|-----------------|-----------------|
| O | 3.232861304245  | 2.609641541733  | 0.382057165874  |
| O | 6.413008475584  | -2.612179002154 | -4.523048253347 |
| O | -4.319233166990 | 2.049196538002  | 1.497110305257  |
| O | -0.131384108609 | 4.862628738291  | 2.323927243682  |
| O | 4.434977086941  | 7.441923908721  | 0.406089570076  |
| O | 7.620063724313  | 2.142688282664  | -4.502584809485 |

|    |                 |                 |                 |
|----|-----------------|-----------------|-----------------|
| O  | -3.122736167997 | 6.855750523926  | 1.500826844636  |
| O  | 1.069090499460  | 9.688251915683  | 2.335654516636  |
| O  | 5.635873261508  | 12.277064546252 | 0.422998059995  |
| O  | 8.822999914343  | 6.965314122484  | -4.488207470570 |
| O  | -1.924010152146 | 11.671200332255 | 1.511205367062  |
| O  | 2.276493348677  | 14.436206913504 | 2.349113199436  |
| Ge | 7.727314395429  | 8.985701467208  | -2.219452922798 |
| Ge | 2.640038862284  | 7.664451610013  | 0.066584330991  |
| Ge | 3.839558980633  | 12.457172197184 | 0.069125439106  |
| Ge | 5.329442636845  | -0.632103043287 | -2.241490650593 |
| Ge | 6.527720130960  | 4.158840572766  | -2.233844985146 |
| Ge | 1.438532943479  | 2.842595873191  | 0.053307575444  |
| TV | 5.050894493673  | -0.000000000000 | 0.000000000000  |
| TV | 3.582665923933  | 14.356630693133 | -0.000000000000 |
| TV | -1.341881358313 | 2.488983739384  | 4.061330828447  |

# EQ-GeO<sub>2</sub> 65

|    |                 |                 |                 |
|----|-----------------|-----------------|-----------------|
| O  | -7.410011768532 | 1.356504926728  | -2.814506086298 |
| O  | 3.930089535323  | -0.549815085483 | 1.361256704029  |
| O  | 4.294896766346  | 0.870837401643  | -1.218911610636 |
| O  | 2.879359057931  | 3.067361818666  | -0.761247229431 |
| O  | -4.657079964911 | -7.795052524629 | -4.491230358061 |
| O  | 2.686003905644  | -2.253892121209 | -0.758169561373 |
| O  | -4.616251852640 | 3.711918540891  | 1.857769586957  |
| O  | 6.726569049906  | 1.834451853812  | 6.002128856872  |
| O  | 7.047225557123  | 3.441573552270  | 3.544642822865  |
| O  | 5.573920922910  | 5.622318570027  | 3.827337324912  |
| O  | -1.884322705902 | -5.616004682657 | -0.028998474890 |
| O  | 5.386950688916  | 0.328940170048  | 3.829767258946  |
| Ge | 5.215944162868  | 3.803172185240  | 3.604606696180  |
| Ge | 2.343366758005  | -1.195130333639 | 0.719297318337  |
| Ge | 1.270049320560  | -3.157610330539 | -1.425141429248 |
| Ge | 5.094996028451  | 1.306060472166  | 5.369807777651  |
| Ge | 2.471301794219  | 1.276338673544  | -1.091911800380 |
| Ge | 3.981799394318  | -0.610820399419 | 3.202134769234  |
| TV | 9.208287277922  | 0.000000000007  | 0.000000000000  |
| TV | 3.325442958374  | 5.855251433574  | 0.000000000007  |
| TV | 5.554453359570  | 4.764837848773  | 9.250847814745  |

# EQ-GeO<sub>2</sub> 66

|    |                  |                 |                  |
|----|------------------|-----------------|------------------|
| O  | -1.288456145754  | -2.001529806418 | 0.212863497354   |
| O  | 5.028996898881   | -0.436799269499 | 3.348308912270   |
| O  | 3.733991948450   | 0.857624261610  | -0.241697170762  |
| O  | 2.205829252043   | 2.237180384612  | -2.562349887841  |
| O  | -11.030222713904 | -6.982189141069 | -12.594381971406 |
| O  | 1.397711142618   | -0.674666683465 | -0.777007672643  |
| O  | 4.107850091514   | -1.990273805887 | 0.240539771219   |
| O  | 10.455292542331  | -0.736384316102 | 3.426239523028   |
| O  | 9.126221255547   | 0.836825667917  | -0.199201165715  |
| O  | 7.584340593945   | 2.170141254545  | -2.534178173538  |
| O  | -5.621298564429  | -6.861481435412 | -12.601003576035 |
| O  | 6.801320656778   | -0.707026098128 | -0.768279122305  |
| Ge | 8.282569380631   | -0.700878257096 | 0.291507318865   |
| Ge | 3.367192411132   | -0.737268374063 | 3.378591775446   |
| Ge | 0.199660360355   | -2.041001965731 | -0.833274655477  |
| Ge | 8.775615280403   | -0.915485737042 | 3.397635363222   |
| Ge | 2.870935340185   | -0.653809369765 | 0.291609588385   |



|    |                 |                 |                 |
|----|-----------------|-----------------|-----------------|
| Ge | 5.591621435250  | -2.068181099792 | -0.808687745986 |
| TV | 10.838906504660 | 0.000000000056  | 0.000000000024  |
| TV | 2.586451374204  | 4.337570544368  | -0.000000000014 |
| TV | 2.613719351596  | 0.915106443801  | 7.293226179627  |

# EQ-GeO<sub>2</sub> 67

|    |                  |                 |                  |
|----|------------------|-----------------|------------------|
| O  | -1.389677723261  | -2.054922378215 | -0.890215754250  |
| O  | 5.325686679692   | 0.118829739752  | 3.224131673946   |
| O  | 3.330663760995   | 0.828227376185  | 0.313958158194   |
| O  | 2.916363729874   | 1.316682220718  | -2.565243421940  |
| O  | -11.689892251026 | -5.524696001180 | -12.520723717271 |
| O  | 1.195846617628   | -0.933468778874 | -0.441135651683  |
| O  | 3.746738354532   | -2.067021977472 | -0.941746732739  |
| O  | 10.470883043711  | 0.226254581824  | 3.206297884792   |
| O  | 8.439066448798   | 0.865208446219  | 0.368501392629   |
| O  | 8.167290256529   | 1.313561001450  | -2.510840875689  |
| O  | -6.555947185302  | -5.466286515730 | -12.461348603120 |
| O  | 6.285440618776   | -0.896992982898 | -0.370864655470  |
| Ge | 7.996701500263   | -0.896747824366 | 0.271472640023   |
| Ge | 3.862041446748   | -0.726477402545 | 3.254753184250   |
| Ge | 0.374048262171   | -2.487770304286 | -0.908830631080  |
| Ge | 9.038995215541   | -0.667107340879 | 3.284846705517   |
| Ge | 2.904600124394   | -0.940273551470 | 0.209540505976   |
| Ge | 5.518280890661   | -2.464314791927 | -0.882084887330  |
| TV | 10.166522857331  | -0.000000000044 | -0.000000000040  |
| TV | 2.379496833350   | 4.543136071105  | 0.000000000013   |
| TV | 2.282573119911   | 1.953738504513  | 7.208109194206   |

# EQ-GeO<sub>2</sub> 68

|    |                 |                 |                 |
|----|-----------------|-----------------|-----------------|
| O  | -2.231781674293 | -1.585330785325 | -1.519570709933 |
| O  | 3.065849135352  | -0.396091907774 | 0.809061187148  |
| O  | 2.857581388364  | 1.831899648000  | -1.512535312780 |
| O  | 2.753123379452  | -0.752083694405 | -1.921560473649 |
| O  | -3.986089275560 | -4.289867589687 | -3.333259068831 |
| O  | 0.301462273975  | 0.068715623241  | -0.817528432507 |
| O  | 0.407204093343  | -0.467146030651 | 2.919072933132  |
| O  | 5.704938774794  | 0.722369095753  | 5.247658418033  |
| O  | 5.496406115752  | 2.950169346709  | 2.926084447393  |
| O  | 5.392021833584  | 0.366009582189  | 2.517174719187  |
| O  | -1.347291956616 | -3.171716939504 | 1.105257231349  |
| O  | 2.940423934920  | 1.186952688087  | 3.620809590760  |
| Ge | 4.718179901624  | 1.621106670631  | 3.949013849763  |
| Ge | 2.857110280484  | -2.759940502420 | 0.916636370980  |
| Ge | -0.494443081671 | -1.020031133998 | -2.054009876877 |
| Ge | 5.496056896915  | -1.641723459157 | 5.355165213506  |
| Ge | 2.079269065098  | 0.502882744837  | -0.489549456699 |
| Ge | 2.144438709133  | 0.098141208283  | 2.384486542934  |
| TV | 6.116971019243  | 0.000000000006  | 0.000000000001  |
| TV | 2.795353840249  | 4.669619028019  | 0.000000000007  |
| TV | 5.277708578617  | 2.236383521648  | 8.876993986207  |

# EQ-GeO<sub>2</sub> 69

|   |                 |                 |                 |
|---|-----------------|-----------------|-----------------|
| O | -2.402006181051 | -1.035604127935 | -1.897334605775 |
| O | 2.523208994235  | 0.099280307124  | 0.807672679265  |
| O | 2.867282392841  | 1.867339067389  | -1.525356267140 |
| O | 3.148492624361  | -2.229377438001 | -1.239021424392 |
| O | -4.114011080448 | -4.237317533936 | -3.397137011962 |

|    |                 |                 |                 |
|----|-----------------|-----------------|-----------------|
| O  | 0.573617601720  | -0.305467556933 | -0.854776836371 |
| O  | -0.301759917266 | 0.672780412311  | 2.652866756693  |
| O  | 4.623381006656  | 1.807482315795  | 5.357823796500  |
| O  | 4.967572981327  | 3.575892769321  | 3.024658952411  |
| O  | 5.248900258723  | -0.521096515821 | 3.311123855564  |
| O  | -2.013690089003 | -2.528685071271 | 1.153087430377  |
| O  | 2.673802595791  | 1.403000601663  | 3.695324326158  |
| Ge | 3.632892856702  | 2.934313204805  | 4.080786194403  |
| Ge | 2.105837531771  | -1.920770804832 | 0.701279682381  |
| Ge | -0.509651607584 | -1.003362142480 | -2.158080939241 |
| Ge | 4.206091621846  | -0.212428688239 | 5.251379076020  |
| Ge | 1.532486479015  | 1.225953544970  | -0.469303032876 |
| Ge | 1.590604340897  | 0.705186870480  | 2.392030557143  |
| TV | 6.119016824240  | 0.000000000004  | -0.000000000004 |
| TV | 3.116521489563  | 4.673343959137  | 0.000000000002  |
| TV | 4.200652748241  | 3.416981905180  | 9.100286968967  |

# EQ-GeO<sub>2</sub> 70

|    |                 |                 |                 |
|----|-----------------|-----------------|-----------------|
| O  | 0.961590599108  | -1.709910214219 | -3.206445231876 |
| O  | 2.684782523337  | -0.925168079220 | 1.252101541771  |
| O  | 3.978759944142  | 0.092935379945  | -1.189681302975 |
| O  | 1.429738865473  | -0.251014924441 | -0.937021416549 |
| O  | -1.735856224985 | -3.685610815592 | -2.878289210811 |
| O  | -0.268668579883 | -1.063531074841 | 0.848428378080  |
| O  | 2.387164381859  | 0.948550950988  | -3.206444024200 |
| O  | 4.110328123773  | 1.733314473589  | 1.252132231027  |
| O  | 5.404340338363  | 2.751394247507  | -1.189646356876 |
| O  | 2.855260005011  | 2.407477882098  | -0.937026411404 |
| O  | -0.310257727933 | -1.027110412469 | -2.878224450604 |
| O  | 1.156885941251  | 1.594960544182  | 0.848386246802  |
| Ge | 4.196818700534  | 3.398673865543  | 0.367918336029  |
| Ge | 2.679159185179  | -0.919941047407 | -2.260864189463 |
| Ge | -1.684035266561 | -2.012073021837 | -1.591665380664 |
| Ge | 4.104702204230  | 1.738549946381  | -2.260866525039 |
| Ge | 2.771264493854  | 0.740183561841  | 0.367898280319  |
| Ge | -0.258468621766 | 0.646390757652  | -1.591591148770 |
| TV | 9.886338940857  | 0.000000000008  | 0.000000000001  |
| TV | 2.851152515852  | 5.316964253336  | 0.000000000014  |
| TV | -2.383842961677 | 3.021751257464  | 4.625449729838  |

# EQ-GeO<sub>2</sub> 71

|    |                 |                 |                 |
|----|-----------------|-----------------|-----------------|
| O  | -2.479646381155 | -1.469451154798 | -1.581929189918 |
| O  | 3.098444724216  | -3.740695300840 | 2.554930876241  |
| O  | 4.465082204704  | 0.604028040213  | -0.123795513964 |
| O  | 0.249061360989  | 3.689084943524  | -4.697680056172 |
| O  | -3.270339330520 | -4.221060005518 | -3.013009023132 |
| O  | 0.084058510383  | -2.135760823603 | -1.432104424066 |
| O  | 0.179280255220  | 3.055223887273  | -1.604383398046 |
| O  | 5.735716490160  | 0.808698858857  | 2.576806762107  |
| O  | 7.121488501801  | 5.130017995293  | -0.176541575598 |
| O  | 2.878992255019  | 8.208215604576  | -4.670447542900 |
| O  | -0.726641138557 | 0.348894467030  | -2.982704665532 |
| O  | 2.727748843914  | 2.378398625315  | -1.420092073454 |
| Ge | 5.214227194594  | 5.422016591552  | -0.397056285750 |
| Ge | 3.199154985481  | -2.622467644117 | 0.514742433149  |
| Ge | -0.764893841320 | -0.510593077564 | -1.351700857670 |
| Ge | 5.864416255918  | 1.916701210265  | 0.549496106066  |

|    |                |                |                 |
|----|----------------|----------------|-----------------|
| Ge | 2.566643505372 | 0.897038714530 | -0.355683710792 |
| Ge | 1.893640133886 | 4.009894377809 | -1.382451324110 |
| TV | 6.232589018122 | 0.000000000006 | 0.000000000001  |
| TV | 5.282263276206 | 9.063939282579 | 0.000000000014  |
| TV | 3.061702012460 | 1.305046069574 | 4.325023030405  |

# EQ-GeO<sub>2</sub> 72

|    |                 |                 |                 |
|----|-----------------|-----------------|-----------------|
| O  | -1.445915242752 | 0.155318875563  | -1.968765654937 |
| O  | 4.369924683359  | 1.040235125543  | 0.789852378998  |
| O  | 2.181372045354  | 2.258507798918  | -1.044310294435 |
| O  | 1.484486319948  | -0.601210148632 | -0.583724271786 |
| O  | -5.332732312858 | -6.827827530708 | -3.598614739155 |
| O  | 1.258944277884  | -1.184220630883 | -1.902444733135 |
| O  | 3.918263029832  | 0.155296090815  | -1.968770080322 |
| O  | 9.734119061438  | 1.040204202540  | 0.789843292052  |
| O  | 7.545510480714  | 2.258480763864  | -1.044337516033 |
| O  | 6.848692768979  | -0.601227819518 | -0.583732796690 |
| O  | 0.031456459857  | -6.827838687091 | -3.598572551840 |
| O  | 6.623196438614  | -1.184260607457 | -1.902428519140 |
| Ge | 8.300586684672  | 0.680414685931  | -0.452413655679 |
| Ge | 2.790234581922  | -2.547574059864 | 1.123355404590  |
| Ge | -0.648092520449 | -1.475310187114 | -2.387399444790 |
| Ge | 8.154447055306  | -2.547589325781 | 1.123355141711  |
| Ge | 2.936403665981  | 0.680414776696  | -0.452418632400 |
| Ge | 4.716113793495  | -1.475326454128 | -2.387403120325 |
| TV | 10.728397103530 | 0.000000000012  | 0.000000000004  |
| TV | 3.246440232825  | 4.911776482412  | 0.000000000009  |
| TV | 4.033185036859  | 2.729222800675  | 4.856513348995  |

# EQ-GeO<sub>2</sub> 73

|    |                 |                 |                 |
|----|-----------------|-----------------|-----------------|
| O  | -1.146135502376 | 0.677810473957  | 2.157620170317  |
| O  | 2.466334880746  | -2.990245009044 | 0.637176785139  |
| O  | 3.077209215278  | 0.558514993298  | -2.633087799125 |
| O  | 1.255333272973  | 1.549631696642  | -0.932582302299 |
| O  | -1.283551199590 | -3.611227684922 | -3.415533569775 |
| O  | -1.829813962476 | -0.074681695914 | -1.258969490070 |
| O  | 1.259397933452  | 2.954228729160  | 1.658026149396  |
| O  | 3.635732993171  | 1.272044889710  | 0.745365254728  |
| O  | 4.554090146627  | 2.782093925452  | -1.562460576589 |
| O  | 2.747726079113  | 4.244871830435  | -0.001879684043 |
| O  | 0.820985659036  | -1.180720876418 | -2.256898461925 |
| O  | -0.608644700562 | 2.260117197907  | -2.944052514570 |
| Ge | 4.129492868572  | 2.986172233701  | 0.342320336642  |
| Ge | 3.056439309377  | -2.674758605261 | -2.168263953900 |
| Ge | -0.846642382510 | -1.559462310850 | -1.533946537657 |
| Ge | 5.014403338281  | 1.216581904947  | -2.532136707005 |
| Ge | 2.371168426019  | 0.135724427130  | -0.391936597528 |
| Ge | 1.239910185039  | 1.514965251884  | -2.751904736589 |
| TV | 7.269553582966  | 0.000000000005  | 0.000000000001  |
| TV | 3.317262751718  | 6.750026043606  | 0.000000000013  |
| TV | -2.533181545099 | -3.614332708653 | 4.945600865291  |

# EQ-GeO<sub>2</sub> 74

|   |                 |                 |                 |
|---|-----------------|-----------------|-----------------|
| O | -1.963669794164 | -0.394730321157 | -1.004912591454 |
| O | 2.915761483192  | -0.217228271196 | 1.022714798551  |
| O | 2.388258569554  | 1.577518798781  | -1.953033502490 |
| O | 3.310610501460  | -0.971363029711 | -1.361018276064 |

|    |                 |                 |                 |
|----|-----------------|-----------------|-----------------|
| O  | -4.292480538639 | -4.479984331839 | -3.590351868961 |
| O  | 0.626230896550  | -0.611968726150 | -0.731858697839 |
| O  | 0.204788575517  | 1.183915664518  | 3.408068423902  |
| O  | 5.084243215720  | 1.361404787572  | 5.435736365490  |
| O  | 4.556751509309  | 3.156162350655  | 2.460001919245  |
| O  | 5.479072860188  | 0.607249657836  | 3.051976222990  |
| O  | -2.124000462738 | -2.901358417698 | 0.822672389507  |
| O  | 2.794706678703  | 0.966656803935  | 3.681151089295  |
| Ge | 4.274377398387  | 2.036805575019  | 3.852622533305  |
| Ge | 2.590927027985  | -2.238988655559 | 0.482439184122  |
| Ge | -0.531099404692 | -1.107968152615 | -2.062905176781 |
| Ge | 4.759404850689  | -0.660353073862 | 4.895437931207  |
| Ge | 2.105905949322  | 0.458175425808  | -0.560390927249 |
| Ge | 1.637375747447  | 0.470658562234  | 2.350103871437  |
| TV | 6.615729962449  | 0.000000000006  | 0.000000000001  |
| TV | 3.373709399301  | 4.512575410939  | 0.000000000006  |
| TV | 4.336925158302  | 3.157216296417  | 8.826027841493  |

# EQ-GeO<sub>2</sub> 75

|    |                 |                 |                 |
|----|-----------------|-----------------|-----------------|
| O  | -0.497701960179 | -0.630302033855 | -0.834065600985 |
| O  | 0.433807195277  | -1.146194316291 | 0.209168883319  |
| O  | 2.708214439308  | 0.787326538100  | -0.051667162168 |
| O  | 3.690170311156  | 1.950546107809  | -3.203227027692 |
| O  | -3.961319769352 | -3.902112627386 | -3.507528393065 |
| O  | 2.159837652952  | -1.027292196281 | -2.097979655433 |
| O  | -1.739699449392 | 0.143394145439  | 4.598582021134  |
| O  | -0.811708452544 | -0.372167018765 | 5.644834786334  |
| O  | 1.462449971446  | 1.560297666018  | 5.381054352915  |
| O  | 2.452384897128  | 2.722756741118  | 2.228246608372  |
| O  | -5.195973834796 | -3.129479750621 | 1.927330269946  |
| O  | 0.919549743888  | -0.268226230371 | 3.339879799233  |
| Ge | 1.440628998016  | -0.398844973682 | 5.193563635420  |
| Ge | -0.426872841164 | -2.615269725258 | 1.112258154626  |
| Ge | 0.419091560948  | -0.936752430440 | -2.468798453431 |
| Ge | -1.673026797287 | -1.842407636822 | 6.545574567541  |
| Ge | 2.684688799164  | -1.169985514439 | -0.245904253178 |
| Ge | -0.820037586809 | -0.165582009323 | 2.965937385129  |
| TV | 6.311597229896  | 0.000000000006  | 0.000000000001  |
| TV | 3.996586263344  | 4.412193522667  | 0.000000000008  |
| TV | -2.480028405531 | 1.546690784322  | 10.867154981560 |

# EQ-GeO<sub>2</sub> 76

|    |                 |                 |                 |
|----|-----------------|-----------------|-----------------|
| O  | -3.124497010281 | 1.128223522398  | -6.015835787843 |
| O  | 3.936834124406  | -4.364187329806 | 4.213458057949  |
| O  | 2.379372443599  | 1.669984067037  | -0.133984786600 |
| O  | 3.070701063389  | 1.734064348666  | -3.023683923787 |
| O  | -4.070395428069 | -3.768089417563 | -4.368474921353 |
| O  | 2.274714892505  | -1.134780027246 | 0.659672811108  |
| O  | 0.187960628404  | 5.382819241700  | -6.016415530309 |
| O  | 7.246894090233  | -0.107938790668 | 4.213309097722  |
| O  | 5.691853807632  | 5.924574773783  | -0.135545774695 |
| O  | 6.380701929118  | 5.989866232570  | -3.024517682752 |
| O  | -0.760978626059 | 0.486705891877  | -4.368405942431 |
| O  | 5.585024533215  | 3.120198992445  | 0.659741172485  |
| Ge | 4.495221018161  | 4.434349875779  | 0.022796958819  |
| Ge | 1.417595032055  | -2.645047412495 | 1.247521146819  |
| Ge | -1.152201985144 | -1.081856128351 | -2.096953192447 |

|    |                |                 |                 |
|----|----------------|-----------------|-----------------|
| Ge | 4.727164088878 | 1.610263740005  | 1.247732355925  |
| Ge | 1.184190647211 | 0.178825843490  | 0.022946944441  |
| Ge | 2.158012367515 | 3.174172855941  | -2.096964466540 |
| TV | 6.133610223134 | 0.000000000006  | 0.000000000001  |
| TV | 6.620562211480 | 8.511514302896  | 0.000000000014  |
| TV | 0.720194193555 | -0.090424709096 | 5.766362459576  |

# EQ-GeO<sub>2</sub> 77

|    |                 |                 |                 |
|----|-----------------|-----------------|-----------------|
| O  | -3.468913037488 | -1.432327504808 | -1.311527231354 |
| O  | 2.613996972852  | -1.351849176589 | 0.654623834450  |
| O  | 4.996820936485  | -0.533765342976 | -0.989314513044 |
| O  | 0.172422185554  | -0.266764066183 | -2.323370106452 |
| O  | -1.197599747990 | -0.628563634471 | -2.858548811668 |
| O  | -0.943461717463 | -0.799497053137 | -0.003052901570 |
| O  | -2.438457903561 | 1.433253415320  | -1.311491554290 |
| O  | 3.644582783961  | 1.513734132747  | 0.654705494600  |
| O  | 6.027293711173  | 2.331825997655  | -0.989086117377 |
| O  | 1.202918081615  | 2.598847031400  | -2.323432382714 |
| O  | -0.167137996674 | 2.236976541108  | -2.858612863156 |
| O  | 0.087108464557  | 2.066080319852  | -0.003118800260 |
| Ge | 4.083336616148  | 2.983167730309  | -0.627479425955 |
| Ge | 5.616641227780  | -2.388526711918 | -1.112188321426 |
| Ge | -1.734163157431 | -2.089323750730 | -1.024719846754 |
| Ge | 6.647076381435  | 0.477070252610  | -1.112207269067 |
| Ge | 3.052946105459  | 0.117576380138  | -0.627427495777 |
| Ge | -0.703717799890 | 0.776263092655  | -1.024652323389 |
| TV | 10.807027362513 | 0.000000000007  | 0.000000000001  |
| TV | 2.060889406734  | 5.731170765804  | 0.000000000014  |
| TV | -2.863300974045 | 0.985695985972  | 3.710586803505  |

# EQ-GeO<sub>2</sub> 78

|    |                 |                 |                 |
|----|-----------------|-----------------|-----------------|
| O  | -2.126397942290 | -1.806424563843 | -2.011570297092 |
| O  | 2.617969630280  | -1.187458813322 | 0.945021499099  |
| O  | 2.963569498051  | 0.976393550129  | -1.004489448537 |
| O  | 2.716359157534  | 1.262803190011  | -2.466959018515 |
| O  | -2.389883707127 | -5.384464189179 | -3.994148704248 |
| O  | 0.430234612419  | -0.683442064341 | -1.023704631871 |
| O  | 0.208472163150  | 2.777802863778  | -2.017720604084 |
| O  | 4.937691007271  | 3.353578540496  | 0.950389361219  |
| O  | 5.288055695592  | 5.546788121740  | -0.985509014298 |
| O  | 5.002833313785  | 5.826959619663  | -2.442331253157 |
| O  | -0.118440178440 | -0.908568475810 | -4.015258302377 |
| O  | 2.764832150159  | 3.892920315967  | -1.017806043059 |
| Ge | 4.564601622133  | 3.833310818421  | -0.735816841900 |
| Ge | 1.388037782951  | -2.365622683761 | 1.854928599008  |
| Ge | -0.350829708062 | -1.611135727127 | -2.385550712591 |
| Ge | 3.692940396534  | 2.162397253308  | 1.827203962554  |
| Ge | 2.231889964577  | -0.732341654452 | -0.744471494709 |
| Ge | 1.982185027195  | 2.994213044564  | -2.397024406170 |
| TV | 5.119819179530  | 0.000000000007  | 0.000000000001  |
| TV | 4.605331374396  | 9.158742619480  | 0.000000000014  |
| TV | 0.166332393619  | 2.126757895319  | 6.640432954021  |

# EQ-GeO<sub>2</sub> 79

|   |                 |                 |                 |
|---|-----------------|-----------------|-----------------|
| O | -4.002166529538 | -2.714207390120 | -5.630424087447 |
| O | 5.032635936701  | -1.225563488969 | 1.875986983864  |
| O | 2.430911733995  | 0.320172591835  | 0.853635477658  |

|    |                 |                 |                 |
|----|-----------------|-----------------|-----------------|
| O  | 2.251562383750  | 2.520618765950  | -1.994134455310 |
| O  | -2.959457791812 | -3.451324702615 | -2.796449386033 |
| O  | 0.388535374719  | -1.302422645360 | -0.628472380997 |
| O  | -1.853279057917 | 1.636728945065  | -5.630422370397 |
| O  | 7.181537094900  | 3.125399075481  | 1.875984977249  |
| O  | 4.579838799256  | 4.671137682352  | 0.853638727616  |
| O  | 4.400453256599  | 6.871568670235  | -1.994097764506 |
| O  | -0.810539899916 | 0.899620579048  | -2.796473277511 |
| O  | 2.537501570681  | 3.048565444398  | -0.628515012198 |
| Ge | 4.393817545400  | 3.352795456704  | -0.394030489246 |
| Ge | 4.217171531116  | -2.812993957774 | 1.487065991717  |
| Ge | -1.407133192506 | -0.796907704474 | -2.439540849243 |
| Ge | 6.366067405203  | 1.537967014759  | 1.487051324481  |
| Ge | 2.244874795073  | -0.998170853215 | -0.394033416565 |
| Ge | 0.741788308609  | 3.554077914460  | -2.439535384324 |
| TV | 5.128330137076  | 0.000000000007  | 0.000000000001  |
| TV | 4.297832606604  | 8.701943918009  | 0.000000000014  |
| TV | 1.674785129876  | 0.139180179954  | 6.012693675486  |

# EQ-GeO<sub>2</sub> 80

|    |                 |                 |                 |
|----|-----------------|-----------------|-----------------|
| O  | -1.261289452167 | 0.469419204024  | -3.089063617624 |
| O  | 1.432070943212  | -0.644996607979 | 1.805287818837  |
| O  | 1.382917564573  | 0.758199943286  | -0.972287748551 |
| O  | 1.305385789629  | -0.416502724119 | -1.905512462127 |
| O  | -1.999335911767 | -9.464203833782 | -2.402937903132 |
| O  | -0.919153891893 | -0.708082030908 | -0.191785697358 |
| O  | -0.636534973444 | 4.431060639688  | 2.425798418710  |
| O  | 2.534943983283  | 1.086571006003  | 5.750016067320  |
| O  | 2.141819566258  | 3.722817417998  | 4.141444707698  |
| O  | 2.034449402272  | 3.225601646425  | 2.713952866496  |
| O  | -1.344365290016 | -5.095846940830 | 1.101883954513  |
| O  | 0.012521990154  | 1.838139546152  | 4.105476550072  |
| Ge | 1.399725746055  | 2.332799263887  | 5.221118787190  |
| Ge | 1.979227697556  | -2.413089475491 | 1.158908414397  |
| Ge | -0.600930669380 | -0.760469466564 | -2.002843730294 |
| Ge | 2.702675024533  | -0.740251822866 | 5.161878846966  |
| Ge | 0.457382877988  | 0.243484393853  | 0.589277475469  |
| Ge | 0.158126025453  | 2.839905884640  | 2.584903847447  |
| TV | 5.200902445522  | 0.000000000003  | 0.000000000003  |
| TV | 1.132771261889  | 6.956696234088  | 0.000000000007  |
| TV | 1.652277654357  | 5.708651287670  | 9.105568814060  |

# EQ-GeO<sub>2</sub> 81

|    |                 |                 |                 |
|----|-----------------|-----------------|-----------------|
| O  | -5.097372953906 | -3.035208849078 | -1.713933268587 |
| O  | 1.868949028379  | -2.014247756104 | 0.078418674337  |
| O  | 2.342576276946  | 0.657608731430  | 0.324915489062  |
| O  | 8.829022396067  | 2.916452926671  | -2.411319995011 |
| O  | -2.735059641961 | -4.164073869289 | -2.662861328253 |
| O  | -0.148925571980 | -0.227578285172 | -0.493608384772 |
| O  | -0.120245109740 | -3.035569297426 | -1.713117505593 |
| O  | 6.847480938599  | -2.013444384280 | 0.077016252947  |
| O  | 7.320896565513  | 0.657297205418  | 0.322361040597  |
| O  | 13.806946789181 | 2.915771203820  | -2.410835472821 |
| O  | 2.242263162641  | -4.164088755915 | -2.660565071988 |
| O  | 4.828290490424  | -0.228000197328 | -0.493334272921 |
| Ge | 6.645321868449  | -0.604364545123 | -1.136535359245 |
| Ge | 0.692311773722  | -3.388531201686 | 0.130916416893  |

|    |                 |                 |                 |
|----|-----------------|-----------------|-----------------|
| Ge | -0.989807106733 | -0.285275088530 | -2.399195752712 |
| Ge | 5.670651381149  | -3.387828697264 | 0.129349763539  |
| Ge | 1.667404108934  | -0.605308423760 | -1.135461280644 |
| Ge | 3.987219593348  | -0.285000778911 | -2.397459461909 |
| TV | 9.955176049050  | 0.000000000018  | 0.000000000012  |
| TV | 3.462574002833  | 4.784607771143  | 0.000000000007  |
| TV | -1.513385859421 | 0.486443232043  | 4.654934084998  |

# EQ-GeO<sub>2</sub> 82

|    |                 |                 |                 |
|----|-----------------|-----------------|-----------------|
| O  | -5.234749060151 | -3.513380628749 | -1.246929673834 |
| O  | 4.145676132736  | -0.488526559245 | -0.607840741402 |
| O  | 3.298262249587  | 2.248567760555  | 0.167962557061  |
| O  | 3.398264196694  | 1.529441218799  | -2.686410365563 |
| O  | -7.312811197101 | -5.892186212450 | -4.312830223244 |
| O  | 1.060528533949  | -0.724109626957 | -0.857911901942 |
| O  | -2.660383823780 | -0.663027039174 | 3.154084728724  |
| O  | 6.718771732188  | 2.362630156153  | 3.791088331945  |
| O  | 5.871820635518  | 5.099472011410  | 4.568308445885  |
| O  | 5.974088377050  | 4.379668855802  | 1.714398558871  |
| O  | -4.741313369159 | -3.040330617574 | 0.082831175699  |
| O  | 3.630747280200  | 2.125781316287  | 3.538608286598  |
| Ge | 6.775935246247  | 4.166568942280  | 3.340219334716  |
| Ge | 2.569454940497  | -1.161387288509 | 0.007412164371  |
| Ge | -0.419304150437 | -0.886262488517 | 0.417640451901  |
| Ge | 5.141029769071  | 1.691275887921  | 4.403583385704  |
| Ge | 4.200818680161  | 1.314854656625  | -1.060657879448 |
| Ge | 2.152805729176  | 1.964780938984  | 4.816575013235  |
| TV | 7.444419260051  | 0.000000000006  | 0.000000000001  |
| TV | 3.861735449978  | 5.031669470278  | 0.000000000007  |
| TV | 5.145690725193  | 5.704801603381  | 8.796230871173  |

# EQ-GeO<sub>2</sub> 83

|    |                 |                 |                 |
|----|-----------------|-----------------|-----------------|
| O  | -4.272351338248 | -1.677386636754 | -2.090657825618 |
| O  | 2.773819265470  | -1.565092940744 | -0.747907338306 |
| O  | 4.421486932203  | -0.005655189546 | 0.187290316421  |
| O  | 1.199090536745  | 0.659344874464  | -1.738877286540 |
| O  | -1.572772505868 | -4.376092269169 | -1.160254174936 |
| O  | -3.335083005427 | -2.720879722051 | -2.494688559515 |
| O  | -2.846580955457 | -2.185959865053 | 0.037205401629  |
| O  | 2.238788378224  | -1.629397711819 | 2.718228653777  |
| O  | 4.001521196776  | -0.082780069279 | 3.491928364852  |
| O  | 1.465597861949  | 0.390312040923  | 1.052195786531  |
| O  | -0.447904465617 | -3.082559050478 | 3.083776969103  |
| O  | -2.308028507002 | -2.417118400349 | 1.342266665889  |
| Ge | 2.046772656410  | 0.246688890077  | 3.070349047806  |
| Ge | 4.676960017720  | -1.887931551260 | -0.212225410524 |
| Ge | -1.520377163513 | -2.553447909891 | -1.802873448381 |
| Ge | 4.294833333727  | -1.959399531097 | 2.790689388191  |
| Ge | 2.475205630605  | 0.321565573818  | -0.452528864882 |
| Ge | -1.143117856667 | -4.127784688610 | 1.325000867517  |
| TV | 9.445182363572  | 0.000000000005  | 0.000000000001  |
| TV | 0.588401879671  | 3.584642407404  | 0.000000000007  |
| TV | 0.475697672228  | -0.430522160329 | 6.702309025537  |

# EQ-GeO<sub>2</sub> 84

|   |                 |                 |                 |
|---|-----------------|-----------------|-----------------|
| O | -3.738644527236 | -0.705104820346 | -1.764134496776 |
| O | 4.107061794874  | -2.118217244605 | 1.477279521912  |

|    |                 |                 |                 |
|----|-----------------|-----------------|-----------------|
| O  | 5.752953992222  | -0.644548126998 | -0.416868465089 |
| O  | 2.427592133891  | 0.718361660878  | -2.950947648194 |
| O  | -2.186141117438 | -2.250466873049 | -3.641404543502 |
| O  | -0.263823308572 | -1.924806948976 | 0.692417959368  |
| O  | -3.641864861797 | 2.337973581566  | -1.764017042954 |
| O  | 4.203769925643  | 0.925092954815  | 1.477363814669  |
| O  | 5.849274603460  | 2.398498131231  | -0.417867916013 |
| O  | 2.524398894838  | 3.761451042733  | -2.950774273249 |
| O  | -2.089147304900 | 0.792549858413  | -3.641499577440 |
| O  | -0.167125293378 | 1.118014868568  | 0.692612591998  |
| Ge | 3.952840643714  | 2.457545974666  | 0.226455906045  |
| Ge | 6.757152169883  | -2.195282090295 | -1.085264941095 |
| Ge | -1.836043381852 | -0.738479899844 | -2.392671804619 |
| Ge | 6.853886747962  | 0.847686356961  | -1.085331704406 |
| Ge | 3.856338325603  | -0.585501625048 | 0.226637061233  |
| Ge | -1.739428272768 | 2.304560982659  | -2.392531226960 |
| TV | 11.591321975752 | 0.000000000007  | 0.000000000001  |
| TV | 0.193470777069  | 6.086096139363  | 0.000000000014  |
| TV | -1.639886774277 | -3.020658572597 | 4.190147327532  |

# EQ-GeO<sub>2</sub> 85

|    |                 |                 |                 |
|----|-----------------|-----------------|-----------------|
| O  | -1.674903631194 | -1.735432146733 | -2.695317010371 |
| O  | 0.812701660238  | -2.657241872885 | -1.387589307625 |
| O  | 1.922589010957  | 0.114851255510  | 1.116851615632  |
| O  | 4.312124370475  | 2.797181906203  | -3.816470950120 |
| O  | 0.192230350650  | -3.915559319153 | -1.873685013747 |
| O  | 0.015124752518  | 0.177851740362  | -1.131457606634 |
| O  | 1.667588056932  | 1.999795714082  | -2.694770819297 |
| O  | 4.155643036667  | 1.077999366665  | -1.387998865686 |
| O  | 5.265226362988  | 3.850160704874  | 1.116693465397  |
| O  | 7.655187976001  | 6.532694563474  | -3.815600216118 |
| O  | 3.535182874256  | -0.180364043338 | -1.873873601287 |
| O  | 3.358184361683  | 3.913020162987  | -1.131845924146 |
| Ge | 3.489779588630  | 3.680241894907  | 0.683482256434  |
| Ge | -0.487836252612 | -2.213773379245 | 1.809935360339  |
| Ge | 0.005589295207  | -1.208612459751 | -2.294570547780 |
| Ge | 2.854903768297  | 1.521297325518  | 1.809655428620  |
| Ge | 0.147041278069  | -0.054698321255 | 0.683851711242  |
| Ge | 3.348356064009  | 2.526539686816  | -2.294958730684 |
| TV | 7.793183811309  | 0.000000000006  | 0.000000000001  |
| TV | 6.685303280212  | 7.470227263392  | 0.000000000014  |
| TV | -1.798043694929 | 2.328831179399  | 5.074773027346  |

# EQ-GeO<sub>2</sub> 86

|    |                 |                 |                 |
|----|-----------------|-----------------|-----------------|
| O  | -3.604450262900 | -1.136181970141 | -1.020272693085 |
| O  | 2.492122161728  | -1.576910972793 | 0.175805109214  |
| O  | 4.819026177539  | -0.533900341814 | -1.212310704871 |
| O  | 1.911407753304  | 0.033715272017  | -2.224389312302 |
| O  | -5.264494500976 | -2.524458353772 | 0.903433110145  |
| O  | -2.884296779313 | -1.251674092550 | 0.230829484579  |
| O  | -2.802482548284 | 2.443850508583  | -1.464064568778 |
| O  | 3.152553121476  | 1.614359998675  | -0.132043701762 |
| O  | 5.536625886461  | 2.940201203669  | -1.554507977821 |
| O  | 2.724658250479  | 3.522934668513  | -2.344860758085 |
| O  | -4.229564031764 | 1.090309610936  | 0.513102399349  |
| O  | -1.768636947558 | 2.283998113360  | -0.431747981060 |
| Ge | 3.818873780780  | 3.163283058413  | -0.912337147786 |



|    |                 |                 |                 |
|----|-----------------|-----------------|-----------------|
| Ge | 5.686729945408  | -2.238526565184 | -0.909442052964 |
| Ge | 0.955859631296  | -1.160652922084 | -3.412162949902 |
| Ge | 6.659991996676  | 0.842946669033  | -1.470867715254 |
| Ge | 3.067372815215  | -0.112787654328 | -0.841959811881 |
| Ge | 0.980478168713  | 2.230404585016  | -2.852205443547 |
| TV | 10.975798275075 | 0.000000000005  | 0.000000000001  |
| TV | 1.324824165104  | 6.248196727646  | 0.000000000014  |
| TV | -5.064611278599 | -2.895929300305 | 4.584135004547  |

# EQ-GeO<sub>2</sub> 87

|    |                 |                 |                 |
|----|-----------------|-----------------|-----------------|
| O  | -1.808202939482 | 0.879730328723  | -2.338640872473 |
| O  | 2.244886450732  | -0.733286014224 | 1.167573017364  |
| O  | 1.364981548947  | 1.340686293849  | -1.022576175803 |
| O  | 1.238340316673  | 0.668336445197  | -2.359037655674 |
| O  | -1.644764089402 | -7.255128948496 | -3.752110779289 |
| O  | -0.174093901486 | -1.078910218283 | -0.685380476803 |
| O  | -1.371625511141 | 3.342774393955  | 2.620338723915  |
| O  | 2.703257930426  | 1.750568643968  | 6.133194509157  |
| O  | 1.839760280866  | 3.772164231733  | 3.839779658889  |
| O  | 1.669988834634  | 3.069293578812  | 2.526556834546  |
| O  | -1.302631888950 | -4.918018562280 | 1.310938644216  |
| O  | 0.274964290564  | 1.405951562723  | 4.305169594636  |
| Ge | 1.399373231614  | 2.542521846966  | 5.218121801697  |
| Ge | 2.416206283372  | -2.672799549888 | 1.122010743931  |
| Ge | -0.444181157582 | -0.266028349474 | -2.304996637025 |
| Ge | 2.827535116526  | -0.194246075072 | 6.140908731133  |
| Ge | 0.909853761486  | 0.046763211123  | 0.290772081367  |
| Ge | -0.029671437503 | 2.172020010083  | 2.669935529449  |
| TV | 6.042977408909  | 0.000000000003  | 0.000000000005  |
| TV | 1.037061298279  | 5.927770489132  | 0.000000000009  |
| TV | 0.886093660728  | 4.944326450004  | 9.939633452584  |

# EQ-GeO<sub>2</sub> 88

|    |                 |                 |                 |
|----|-----------------|-----------------|-----------------|
| O  | -1.539531590826 | -1.479742957216 | -2.211731596447 |
| O  | 0.691602584927  | -0.947824101905 | 1.998158488800  |
| O  | 2.435836609253  | 1.511426429609  | -0.345491702426 |
| O  | 0.934391921205  | -0.580351501811 | -3.210915489354 |
| O  | 0.002942221717  | -0.582441582566 | -4.359922159975 |
| O  | 0.886077917633  | -0.825517841780 | -0.756499026982 |
| O  | 3.245662927225  | -1.479705322031 | -2.211731550780 |
| O  | 5.476846151988  | -0.947946780489 | 1.998189527602  |
| O  | 7.221070701832  | 1.511416716335  | -0.345509558353 |
| O  | 5.719655597328  | -0.580458006899 | -3.210907162650 |
| O  | 4.788202445614  | -0.582415368952 | -4.359882807515 |
| O  | 5.671328865855  | -0.825597246300 | -0.756534597454 |
| Ge | 7.434387461852  | -0.749891550625 | -0.139584837953 |
| Ge | 0.333572050874  | -2.662410601233 | 1.407244206138  |
| Ge | 0.222505130169  | -2.085687120885 | -1.878077120944 |
| Ge | 5.118768068060  | -2.662467701444 | 1.407209033951  |
| Ge | 2.649129015658  | -0.749767785489 | -0.139523929278 |
| Ge | 5.007686082281  | -2.085759458421 | -1.878093179960 |
| TV | 9.570466990735  | 0.000000000014  | 0.000000000002  |
| TV | 2.561337019328  | 4.748806961302  | 0.000000000006  |
| TV | -0.049138545055 | 2.391194684791  | 5.112242449421  |

# EQ-GeO<sub>2</sub> 89

|   |                 |                 |                 |
|---|-----------------|-----------------|-----------------|
| O | -3.243758453654 | -0.972592018050 | -0.707632660551 |
|---|-----------------|-----------------|-----------------|

|    |                 |                 |                 |
|----|-----------------|-----------------|-----------------|
| O  | 1.931571460204  | -1.724438325712 | 0.205260793047  |
| O  | 4.187117617882  | -1.030210151155 | -1.473266715789 |
| O  | 1.427469920842  | -0.031029216699 | -2.190665401214 |
| O  | 0.459230810868  | -1.735074873638 | 0.100907176145  |
| O  | -1.467466481876 | 0.055524748083  | -2.038315086497 |
| O  | -0.657403599039 | 1.947275757364  | -0.707633583381 |
| O  | 4.517815027975  | 1.195749196490  | 0.204751353374  |
| O  | 6.773687729846  | 1.889642349640  | -1.473493349852 |
| O  | 4.013831276189  | 2.888912593368  | -2.190747417042 |
| O  | 3.045458341358  | 1.185138122776  | 0.100803064277  |
| O  | 1.118666127493  | 2.975747051319  | -2.038459566160 |
| Ge | 5.208028270701  | 2.556390891258  | -0.874215008642 |
| Ge | 5.392362210943  | -2.053926270480 | -0.549035474919 |
| Ge | -2.455505304762 | -1.658239199145 | -2.327793457317 |
| Ge | 7.978863142589  | 0.865876378054  | -0.549256489211 |
| Ge | 2.621485475542  | -0.363523890100 | -0.873917640900 |
| Ge | 0.130907081222  | 1.261672124267  | -2.327837320455 |
| TV | 10.366357489692 | 0.000000000006  | -0.000000000000 |
| TV | 5.172851022283  | 5.839747926785  | 0.000000000014  |
| TV | -2.429515913802 | -0.470481987106 | 4.325390186004  |

# EQ-GeO<sub>2</sub> 90

|    |                 |                 |                 |
|----|-----------------|-----------------|-----------------|
| O  | -1.471249715577 | -3.666121998252 | -3.398644358234 |
| O  | 1.195699561002  | 0.303771785738  | 1.691631766087  |
| O  | 3.188791523067  | 1.340727857630  | 0.182204910120  |
| O  | 3.260619625531  | -0.013205742849 | -2.300169776712 |
| O  | -2.321987343656 | -3.885027572663 | -4.560168410298 |
| O  | 0.811461595164  | -0.637814084557 | -0.644786994503 |
| O  | 3.281802680650  | -3.666084825402 | -3.398727951738 |
| O  | 5.948888317776  | 0.303685759942  | 1.691591550855  |
| O  | 7.941982064885  | 1.340686796183  | 0.182157066774  |
| O  | 8.014001151203  | -0.013218396347 | -2.300424479396 |
| O  | 2.430902287137  | -3.885087553356 | -4.560230004338 |
| O  | 5.564746508364  | -0.637909771666 | -0.644864668038 |
| Ge | 6.142703675277  | 1.114488459767  | -0.212934437182 |
| Ge | 0.989067362857  | -1.574939347382 | 1.193153801142  |
| Ge | -0.477200879321 | -1.483510338937 | -1.974498371992 |
| Ge | 5.742274872547  | -1.574956406194 | 1.193059526307  |
| Ge | 1.389518600861  | 1.114520155991  | -0.212795016166 |
| Ge | 4.276035885170  | -1.483517908913 | -1.974483945994 |
| TV | 9.506599663020  | 0.000000000012  | 0.000000000002  |
| TV | 2.409875227694  | 4.469536143408  | 0.000000000007  |
| TV | 0.581471689198  | 2.266057189485  | 5.176435668801  |

# EQ-GeO<sub>2</sub> 91

|   |                 |                 |                 |
|---|-----------------|-----------------|-----------------|
| O | -3.159103299765 | -1.019960181526 | -1.459870717035 |
| O | 1.778981821119  | -0.619772063218 | 0.962611867923  |
| O | 4.455428333204  | -0.090331082684 | -0.335649601453 |
| O | 1.835741487159  | 0.153242183886  | -1.725543404952 |
| O | -1.730225312536 | -3.352028969254 | -3.157752799047 |
| O | -1.956865646961 | -1.493443730768 | -0.735473585430 |
| O | -1.692614823352 | 2.447066201727  | -1.514146348527 |
| O | 3.633604423101  | 2.678308505740  | 1.319907419415  |
| O | 5.994394785440  | 3.377604473805  | -0.431311843785 |
| O | 3.308743319268  | 3.480199643593  | -1.349182845207 |
| O | -0.617778438006 | -0.298156729569 | -3.149543888341 |
| O | -0.529948559421 | 1.788697553272  | -0.881039405086 |

|    |                 |                 |                 |
|----|-----------------|-----------------|-----------------|
| Ge | 4.315049685106  | 3.908177993899  | 0.148284292576  |
| Ge | 4.907494419722  | -1.827723814924 | -0.969338880593 |
| Ge | -0.850471342086 | -1.963346546080 | -2.199829680080 |
| Ge | 6.228001632260  | 1.208435446008  | -1.003012434882 |
| Ge | 2.712976152194  | 0.780502038554  | -0.104768508877 |
| Ge | 0.465637929286  | 1.117560535725  | -2.371128432515 |
| TV | 9.827925139594  | 0.000000000007  | 0.000000000001  |
| TV | 2.700197154582  | 6.147408745950  | 0.000000000014  |
| TV | -3.454654581188 | -1.916721755180 | 4.135350837146  |

# EQ-GeO<sub>2</sub> 92

|    |                 |                 |                 |
|----|-----------------|-----------------|-----------------|
| O  | -3.295180103256 | -0.710984460846 | -1.174586125812 |
| O  | 2.731899569634  | -1.621039812314 | 0.674370287829  |
| O  | 4.749335918282  | -0.303307763167 | -1.049877228071 |
| O  | 1.754296747497  | 0.133064146230  | -1.611981012349 |
| O  | -1.565257378396 | -2.579754970176 | -2.809335826455 |
| O  | -2.272952295882 | -0.878906697791 | -0.187568035203 |
| O  | -2.780886418872 | 2.449324849243  | -1.174883297886 |
| O  | 3.246206806630  | 1.539224317117  | 0.674174154118  |
| O  | 5.263645130999  | 2.857157440006  | -1.049688466869 |
| O  | 2.269148224109  | 3.293441109235  | -1.612128689700 |
| O  | -1.051035633974 | 0.580637652149  | -2.809105555535 |
| O  | -1.758372206541 | 2.281367047755  | -0.188113687923 |
| Ge | 3.510569862912  | 3.119700492975  | -0.385815573905 |
| Ge | 5.775224517507  | -2.084571900378 | -0.886260989043 |
| Ge | -0.136169468665 | -1.201863955925 | -2.046684231061 |
| Ge | 6.289481998478  | 1.075892409237  | -0.886426474057 |
| Ge | 2.996263956775  | -0.040650210130 | -0.386095680705 |
| Ge | 0.376929130137  | 1.958743028601  | -2.046782363267 |
| TV | 10.603724182470 | 0.000000000008  | 0.000000000001  |
| TV | 1.028478904527  | 6.320789675251  | 0.000000000014  |
| TV | -3.510360547683 | -2.713345118372 | 3.740329908121  |

# EQ-GeO<sub>2</sub> 93

|    |                 |                 |                 |
|----|-----------------|-----------------|-----------------|
| O  | -3.266309006002 | -0.937008232699 | -1.447558503580 |
| O  | 1.574761529152  | -0.579929235734 | 0.985524088701  |
| O  | 4.259395216575  | -0.045985843883 | -0.339523464680 |
| O  | 1.604529405540  | 0.171656377717  | -1.671686784836 |
| O  | -1.807950417515 | -3.417990443096 | -3.191341322263 |
| O  | -2.048307146873 | -1.438882124727 | -0.787545228137 |
| O  | -1.862396936426 | 2.537416375228  | -1.548755467345 |
| O  | 3.300220545355  | 2.794816419043  | 1.397492256266  |
| O  | 5.692541732174  | 3.418394541751  | -0.383661142121 |
| O  | 3.030338267015  | 3.461314266849  | -1.322048839136 |
| O  | -0.732750143466 | -0.343681289815 | -3.196917098360 |
| O  | -0.739937783790 | 1.838419871891  | -0.874623939817 |
| Ge | 4.014241293089  | 3.953631144962  | 0.177738123307  |
| Ge | 4.715231393501  | -1.800852998659 | -0.958965014318 |
| Ge | -0.967502702230 | -2.003267155403 | -2.229885320947 |
| Ge | 5.940535209290  | 1.212618582502  | -1.034296464286 |
| Ge | 2.496314900725  | 0.834108511263  | -0.075153686576 |
| Ge | 0.237726811447  | 1.112295451923  | -2.341936426745 |
| TV | 9.735194008585  | 0.000000000005  | 0.000000000001  |
| TV | 2.565699618713  | 6.161426032705  | 0.000000000014  |
| TV | -3.439783940386 | -1.804024355020 | 4.190077049727  |

# EQ-GeO<sub>2</sub> 94

|    |                 |                  |                 |
|----|-----------------|------------------|-----------------|
| O  | 0.779429691327  | 8.154462693682   | 0.749248345000  |
| O  | 0.995432500542  | -3.446656596099  | -0.402207124498 |
| O  | 1.853957161536  | -0.642081803298  | -1.616379895219 |
| O  | 1.765862669312  | 2.424640384348   | -2.498103908004 |
| O  | 2.287899699840  | -17.685093155753 | -4.374017395900 |
| O  | 0.276502882067  | 1.615128889487   | -0.194285337102 |
| O  | 3.865610843630  | 8.154487442294   | 0.749242182081  |
| O  | 4.081706427245  | -3.446667729051  | -0.402231955221 |
| O  | 4.940155206828  | -0.642072862099  | -1.616386451820 |
| O  | 4.851998573531  | 2.424705645849   | -2.498109472830 |
| O  | 5.374096045450  | -17.685064220275 | -4.374055491942 |
| O  | 3.362685154267  | 1.615183981596   | -0.194381827696 |
| Ge | 3.397139225927  | -0.056012203060  | -0.792303006040 |
| Ge | -1.138208879560 | -2.501601076738  | 0.939893611573  |
| Ge | 0.230259862932  | 3.188846938265   | -1.308513711587 |
| Ge | 1.947962187063  | -2.501602101600  | 0.939886143838  |
| Ge | 0.310962087666  | -0.056038763860  | -0.792297495025 |
| Ge | 3.316430212778  | 3.188906001925   | -1.308600673242 |
| TV | 6.172361181271  | 0.000000000008   | 0.000000000008  |
| TV | 0.484261878311  | 9.334392260093   | 0.000000000008  |
| TV | -2.502490276580 | 4.502626011076   | 5.286970167857  |

# EQ-GeO<sub>2</sub> 95

|    |                 |                 |                 |
|----|-----------------|-----------------|-----------------|
| O  | -3.060702586563 | -0.969412070389 | -1.187265798675 |
| O  | 1.937840060986  | -0.923915665237 | 0.870172449679  |
| O  | 4.497487205349  | -0.081273049763 | -0.447682668385 |
| O  | 2.045259540868  | 0.818509910400  | -1.672872512680 |
| O  | -1.512970172653 | -3.168988543670 | -3.242142464234 |
| O  | -1.685859202580 | -1.405294319761 | -0.727310018891 |
| O  | -1.969245375415 | 2.166407082194  | -1.299777962516 |
| O  | 3.078983829493  | 2.192838742138  | 0.868422290610  |
| O  | 5.644357097267  | 3.035046584951  | -0.475125780396 |
| O  | 3.197061284916  | 3.913285243006  | -1.683215957028 |
| O  | -0.401215421383 | -0.114759368059 | -3.238303505147 |
| O  | -0.623203000367 | 1.733079848218  | -0.804999792340 |
| Ge | 3.943151944873  | 3.625591456761  | -0.032680327927 |
| Ge | 5.139878117966  | -2.048171437144 | -0.910136243775 |
| Ge | -0.688823053380 | -1.744196683072 | -2.278657715770 |
| Ge | 6.273616891749  | 1.041990417987  | -0.935653751893 |
| Ge | 2.800997758076  | 0.527899864878  | -0.023712435754 |
| Ge | 0.437093640099  | 1.364199114463  | -2.322062903126 |
| TV | 10.054978607345 | 0.000000000005  | 0.000000000001  |
| TV | 2.259700050645  | 6.200676490287  | 0.000000000014  |
| TV | -4.004231845683 | -2.165232406165 | 4.414113280568  |

# EQ-GeO<sub>2</sub> 96

|   |                 |                 |                 |
|---|-----------------|-----------------|-----------------|
| O | -0.471438358377 | -0.037495027372 | -0.235108036576 |
| O | -3.466407381897 | -0.151856817613 | -1.777501207857 |
| O | -2.657101753203 | 0.128548866725  | -2.691166451530 |
| O | -1.925306774207 | -2.543761632724 | -0.337339918916 |
| O | 0.000470521262  | -1.677535646256 | -2.681518266468 |
| O | -4.815869091849 | -2.655928541820 | -0.159173417911 |
| O | -3.187791824647 | 4.899021597258  | -0.260184146276 |
| O | -6.193896127764 | 4.775686736730  | -1.788459297740 |
| O | -5.380048327653 | 5.057536874608  | -2.697315413248 |
| O | -4.639916125448 | 2.390923836067  | -0.336908806511 |
| O | -2.714900952048 | 3.243847393785  | -2.691685813410 |

|    |                 |                 |                 |
|----|-----------------|-----------------|-----------------|
| O  | -7.534015371996 | 2.276612500107  | -0.159057853342 |
| Ge | -4.851951311834 | 5.421502786134  | 0.870468310425  |
| Ge | -3.324722071881 | -3.286585119997 | -1.466256144224 |
| Ge | -0.417744265012 | -1.757339605517 | -0.932180420128 |
| Ge | -6.040385064669 | 1.634640836107  | -1.456094617176 |
| Ge | -2.137959854461 | 0.495749468661  | 0.883711699497  |
| Ge | -3.132978894358 | 3.172982636071  | -0.942267476346 |
| TV | 5.830857828367  | -0.000000000000 | 0.000000000000  |
| TV | -5.434399783493 | 9.864329238780  | -0.000000000000 |
| TV | -1.014736451296 | 2.549934068673  | 5.102114924915  |

# EQ-GeO<sub>2</sub> 97

|    |                 |                 |                 |
|----|-----------------|-----------------|-----------------|
| O  | -3.143443724175 | -0.965160007659 | -1.183468783229 |
| O  | 1.864820631771  | -0.890619822630 | 0.762938992756  |
| O  | 4.436291317818  | -0.062617826652 | -0.574909118570 |
| O  | 1.979467867125  | 0.839966123434  | -1.758132585653 |
| O  | -1.742577107478 | -3.190240837018 | -3.175050442034 |
| O  | -1.785195198111 | -1.391922265473 | -0.711654931654 |
| O  | -2.002816021305 | 2.101463349072  | -1.121104849392 |
| O  | 2.982811581118  | 2.184063284482  | 0.766521808784  |
| O  | 5.589583964500  | 2.992596387980  | -0.444450637417 |
| O  | 3.122064277640  | 3.935535600000  | -1.741118545772 |
| O  | -0.583578353643 | -0.030418281271 | -3.178997394331 |
| O  | -0.627368669496 | 1.667939110550  | -0.639332239945 |
| Ge | 3.879762805413  | 3.622599138381  | -0.096449633837 |
| Ge | 5.093305881696  | -2.080650132385 | -0.920072916072 |
| Ge | -0.803851945467 | -1.737030113964 | -2.286373822380 |
| Ge | 6.219737612485  | 1.020820166833  | -0.889397716272 |
| Ge | 2.742166263219  | 0.530953491035  | -0.120268759335 |
| Ge | 0.308695256455  | 1.359081524073  | -2.231683523818 |
| TV | 10.078875088358 | 0.000000000005  | 0.000000000001  |
| TV | 2.267295191803  | 6.194633303380  | 0.000000000014  |
| TV | -3.983280030238 | -2.169922770312 | 4.378681703382  |

# EQ-GeO<sub>2</sub> 98

|    |                 |                 |                 |
|----|-----------------|-----------------|-----------------|
| O  | -5.324067913506 | -3.398207410449 | 2.465707244159  |
| O  | 2.775627177539  | -0.278609893756 | -0.494372015019 |
| O  | 3.822663125885  | 2.287418174068  | -0.478988088610 |
| O  | 5.014303884418  | 1.723627192375  | -2.826982205634 |
| O  | -3.084251101943 | -5.415260734930 | -4.562381716018 |
| O  | 0.366626659589  | -0.706570698807 | -1.887405024163 |
| O  | -5.505384448529 | -0.840596331021 | 6.377135890153  |
| O  | 2.595216588862  | 2.288043846732  | 3.420035522392  |
| O  | 3.642322884751  | 4.854520229112  | 3.430836944691  |
| O  | 4.830848751272  | 4.288540735685  | 1.081932692223  |
| O  | -3.266429543529 | -2.857366275171 | -0.647700976068 |
| O  | 0.186856473832  | 1.863671930365  | 2.028333391279  |
| Ge | 3.514991856077  | 3.477577187764  | 2.157469265145  |
| Ge | 1.251646795592  | -1.665505480631 | -0.531409376055 |
| Ge | -1.895344671615 | -1.777606757681 | -0.011387742734 |
| Ge | 1.071571327074  | 0.900592845473  | 3.381710920607  |
| Ge | 3.696616560832  | 0.912007108773  | -1.754361715917 |
| Ge | -2.075608737662 | 0.788697732072  | 3.901530912244  |
| TV | 5.932967651005  | 0.000000000008  | -0.000000000001 |
| TV | 4.107007897967  | 5.295411246126  | 0.000000000008  |
| TV | -0.361873918479 | 5.124892128666  | 7.825083050933  |

# EQ-GeO<sub>2</sub> 99

|    |                 |                 |                 |
|----|-----------------|-----------------|-----------------|
| O  | -3.030151044739 | -1.059344625315 | -1.212537338350 |
| O  | 1.641625274606  | -0.836331177942 | 0.676461416955  |
| O  | 4.353987934356  | -0.189770167389 | -0.320873678896 |
| O  | 2.026398876752  | 0.812799851443  | -1.809059832818 |
| O  | -2.061616768307 | -3.099475449990 | -2.882078716209 |
| O  | -1.748828996101 | -1.539856261234 | -0.578847535229 |
| O  | -1.809597068871 | 2.246368501235  | -1.209617098956 |
| O  | 3.074451104160  | 2.193152462908  | 0.725634007918  |
| O  | 5.591417711560  | 3.180613949855  | -0.320641186652 |
| O  | 3.185167809485  | 3.959161847920  | -1.806986717137 |
| O  | -0.985613114742 | 0.073062098118  | -2.761843791896 |
| O  | -0.523891463960 | 1.774198861992  | -0.578051894681 |
| Ge | 3.853900118756  | 3.727242655930  | -0.106836102709 |
| Ge | 4.927792910178  | -2.057055074940 | -0.905578534223 |
| Ge | -0.781827009120 | -1.775196567004 | -2.354620282100 |
| Ge | 6.262258982564  | 1.016467682606  | -0.934367340681 |
| Ge | 2.676389504277  | 0.522865314950  | -0.109970195708 |
| Ge | 0.374352573307  | 1.344755873204  | -2.353329413496 |
| TV | 9.823431036900  | 0.000000000006  | 0.000000000001  |
| TV | 2.319531791651  | 6.275168334426  | 0.000000000014  |
| TV | -2.793754719192 | -2.538767967928 | 3.809251660094  |

# EQ-GeO<sub>2</sub> 100

|    |                 |                 |                 |
|----|-----------------|-----------------|-----------------|
| O  | -0.557123194113 | 1.618561481036  | 1.456088134686  |
| O  | 3.483720644893  | -3.107293629403 | -2.973075887910 |
| O  | 4.164643031332  | -1.403572206735 | -0.637308247771 |
| O  | 1.850397049577  | -1.414131181440 | -4.035794633191 |
| O  | 3.677008405129  | -1.910982390215 | 0.487726978787  |
| O  | 1.359493831641  | -1.609011083196 | -1.207829002953 |
| O  | -3.934138814176 | 5.057676673421  | 1.275469058636  |
| O  | 3.382418069260  | 0.203766906163  | -2.702243118330 |
| O  | 1.878208539044  | 3.260447088758  | -1.611732410738 |
| O  | 0.998481107010  | 1.528756228791  | -4.026110381796 |
| O  | 2.251249453055  | 2.737946959490  | -0.316922943869 |
| O  | -0.116079634503 | 1.009936061708  | -1.162427758815 |
| Ge | 0.549697665043  | 2.145790753693  | -2.349021478176 |
| Ge | 0.864846814965  | 0.615502603507  | 0.489718727783  |
| Ge | -1.307117697763 | 1.153396894200  | 2.988155279599  |
| Ge | -2.892437691677 | 3.756967057666  | 0.280403064341  |
| Ge | 2.832868089148  | -1.506164931319 | -2.232555338755 |
| Ge | -5.417360339433 | 4.227711306555  | 2.217553192060  |
| TV | 6.859854475914  | 0.000000000002  | -0.000000000000 |
| TV | -4.135197406162 | 6.532973735665  | -0.000000000001 |
| TV | -3.706891899125 | 0.787323734400  | 7.253814771947  |

# EQ-GeO<sub>2</sub> 101

|   |                 |                 |                 |
|---|-----------------|-----------------|-----------------|
| O | -3.482928221982 | 2.488172031951  | 3.654765814872  |
| O | 0.784219851630  | 0.001123952043  | 1.532898319818  |
| O | -3.565212769664 | 0.738055193582  | -0.610696232292 |
| O | -3.102504455230 | 1.368248426124  | 4.030873032589  |
| O | -0.572326884825 | -0.584727754604 | -1.171364798336 |
| O | -0.840760733015 | 2.064042231611  | -0.124365553696 |
| O | -6.422166093333 | 6.647068035117  | 3.678178999863  |
| O | -1.974336645270 | 4.175910595221  | 1.527856571505  |
| O | -6.324301136362 | 4.910375312131  | -0.617487353024 |
| O | -5.870406976891 | 5.564370389737  | 3.931027108803  |

|    |                 |                 |                 |
|----|-----------------|-----------------|-----------------|
| O  | -3.330638823604 | 3.586275856372  | -1.174033247772 |
| O  | -3.599638564131 | 6.237136072089  | -0.130763708200 |
| Ge | -5.794315223177 | 3.714483637725  | 1.008327665543  |
| Ge | 0.250211994591  | 0.596370866072  | -0.097095136681 |
| Ge | 0.388760846452  | -2.205721686124 | -1.693376257714 |
| Ge | -2.508418984332 | 4.769213676115  | -0.102588530036 |
| Ge | -3.037006941931 | -0.462646378581 | 1.010629999119  |
| Ge | -2.367768657270 | 1.963080664149  | -1.689997531213 |
| TV | 5.629814222569  | -0.000000000000 | -0.000000000000 |
| TV | -5.516164023478 | 8.345842078939  | -0.000000000000 |
| TV | 1.731776196943  | -0.786662177516 | 7.534261981417  |

# EQ-GeO<sub>2</sub> 102

|    |                 |                 |                 |
|----|-----------------|-----------------|-----------------|
| O  | -2.082225750981 | -1.404585797210 | -2.619897824701 |
| O  | 1.795137516940  | -0.735641659059 | -0.201850668447 |
| O  | 4.565950804160  | 0.091153797244  | -0.157107568617 |
| O  | 1.453860741883  | 2.036383921224  | -0.107560765359 |
| O  | 0.612658830572  | -3.102378188828 | -2.374063549969 |
| O  | 0.753549920483  | -1.975271617727 | -2.887213272356 |
| O  | -2.400744094803 | 0.698834114399  | 2.495599244476  |
| O  | 1.476744384505  | 1.367907881386  | 4.913576429968  |
| O  | 4.247521969022  | 2.194521769390  | 4.958399775449  |
| O  | 1.135293257993  | 4.139792082663  | 5.008099521030  |
| O  | 0.293968070756  | -0.999254588382 | 2.741314627100  |
| O  | 0.434924692755  | 0.127915271021  | 2.228318269274  |
| Ge | 0.437752303498  | 2.610451185759  | 3.848610571530  |
| Ge | 0.385227052420  | -3.205074272595 | 0.931821528844  |
| Ge | -2.133237994785 | -1.219059207851 | -0.812566767879 |
| Ge | 0.066691943473  | -1.101733556863 | 6.047571349579  |
| Ge | 0.756256682783  | 0.506896303528  | -1.266858854459 |
| Ge | -2.451685768492 | 0.884321752322  | 4.302936216980  |
| TV | 5.563780170346  | 0.000000000005  | -0.000000000002 |
| TV | 3.190556733969  | 4.917379286096  | 0.000000000006  |
| TV | -0.637125358768 | 4.206687771834  | 10.231108982387 |

# EQ-GeO<sub>2</sub> 103

|    |                 |                 |                 |
|----|-----------------|-----------------|-----------------|
| O  | -4.096904672869 | -2.249804878889 | -0.331184396186 |
| O  | 2.827779022853  | -0.140130560045 | 0.562737963986  |
| O  | 4.505438792635  | 1.293214000480  | -1.521602883562 |
| O  | 1.675806083699  | 0.781887476196  | -1.910327382910 |
| O  | -1.540883253205 | -3.182607379031 | -1.187281468029 |
| O  | -1.249897463075 | -4.204460665451 | -0.531464604330 |
| O  | -3.996578104954 | 2.213265255121  | -0.208176898313 |
| O  | 2.623006363171  | 2.822848658911  | 0.263083669706  |
| O  | 4.743389233926  | 4.231585967081  | -1.363614859386 |
| O  | 1.795504767197  | 4.743257126793  | -1.804028755579 |
| O  | -1.429769658421 | 1.021200700868  | -1.077439616374 |
| O  | -1.466015025764 | -0.218772581564 | -0.879798778761 |
| Ge | 2.933500252852  | 4.780133220742  | -0.314462266431 |
| Ge | 5.391375112174  | -1.968655796548 | -1.518525253712 |
| Ge | 0.528804562615  | -1.963627385153 | -2.328751973623 |
| Ge | 5.726910055541  | 2.675362470563  | -1.461721141135 |
| Ge | 2.878745543167  | 1.245453758191  | -0.647881246195 |
| Ge | 0.373784249934  | 1.958670274048  | -2.696348905027 |
| TV | 10.928636616537 | 0.000000000007  | 0.000000000001  |
| TV | 0.090900152766  | 8.092321835320  | 0.000000000014  |
| TV | -3.920429057118 | -2.851040026617 | 3.565386986114  |

# EQ-GeO<sub>2</sub> 104

|    |                 |                 |                 |
|----|-----------------|-----------------|-----------------|
| O  | 1.041866264567  | 1.985266135559  | 1.673545801433  |
| O  | 5.193429061043  | 0.397644734555  | -5.954566186325 |
| O  | -6.024555558768 | 2.138459309894  | 5.261386453717  |
| O  | 2.561281398265  | 1.785461009856  | -0.767894152388 |
| O  | 1.392042073415  | 5.319515847735  | 1.677288230942  |
| O  | 5.533312208643  | 3.745453860985  | -5.960617265220 |
| O  | -5.675892960281 | 5.503735863340  | 5.261121457175  |
| O  | 2.911094038414  | 5.107913416157  | -0.754566923904 |
| O  | 1.762543546362  | 8.647478480732  | 1.681266704557  |
| O  | 5.901722956533  | 7.085670221331  | -5.953608589454 |
| O  | -5.309999261288 | 8.833898943541  | 5.269037202544  |
| O  | 3.278922584240  | 8.462086880147  | -0.756394322464 |
| Ge | 7.545337480375  | 6.653401528004  | -2.467345012208 |
| Ge | 0.971142354092  | 5.344398701342  | -0.099337409908 |
| Ge | 1.336305519440  | 8.683108880386  | -0.093327088859 |
| Ge | 6.840796395265  | -0.027557936258 | -2.457511663731 |
| Ge | 7.188653323666  | 3.322910031845  | -2.475791316924 |
| Ge | 0.622260095168  | 2.004857623906  | -0.102290462975 |
| TV | 4.711879742716  | -0.000000000001 | -0.000000000002 |
| TV | 1.064042018938  | 10.024084548822 | -0.000000000001 |
| TV | -0.063856185014 | -0.054736259043 | 4.927093029025  |

# EQ-GeO<sub>2</sub> 105

|    |                 |                 |                 |
|----|-----------------|-----------------|-----------------|
| O  | 6.925443714241  | 3.557604936055  | 0.266957782695  |
| O  | 0.436483785781  | -2.415363331580 | -3.000321701936 |
| O  | -7.659085853611 | 0.668060908937  | 0.511797247747  |
| O  | 3.270215483698  | 2.890748006924  | -0.420915503875 |
| O  | 8.222738550181  | 5.977124039404  | 3.118936014583  |
| O  | 1.733672302026  | 0.004237870117  | -0.148399319076 |
| O  | -6.361755100279 | 3.087570639532  | 3.363564805701  |
| O  | 4.567418434896  | 5.310196928450  | 2.430993950144  |
| O  | 9.519904671545  | 8.396422303432  | 5.970617369743  |
| O  | 3.030920935666  | 2.423650930192  | 2.703424549873  |
| O  | -5.064631280843 | 5.506922124598  | 6.215578740397  |
| O  | 5.864679934480  | 7.729662481269  | 5.282757261397  |
| Ge | 6.868444039713  | 4.456783937360  | 4.862699850727  |
| Ge | 5.672554263826  | 6.352796207021  | 3.788219479630  |
| Ge | 6.969737621652  | 8.772213348818  | 6.640156126586  |
| Ge | 4.273945711840  | -0.382207035110 | -0.840997054178 |
| Ge | 5.571179429343  | 2.037298939094  | 2.010881406524  |
| Ge | 4.375278931178  | 3.933332353341  | 0.936408365658  |
| TV | 6.522113939780  | 0.000000000000  | -0.000000000000 |
| TV | 4.135109311404  | 4.500196509173  | -0.000000000000 |
| TV | 3.891679682396  | 7.258402723320  | 8.555642033487  |

# EQ-GeO<sub>2</sub> 106

|   |                 |                 |                 |
|---|-----------------|-----------------|-----------------|
| O | 2.426566777147  | 6.101349536952  | 1.214632172387  |
| O | 4.453409317286  | -4.575822754897 | -3.136730056605 |
| O | -1.678911829251 | 3.021714104997  | 1.153583112824  |
| O | -1.629472765091 | 1.923871400393  | 0.212524707076  |
| O | 6.406755925683  | 6.131813058731  | 1.165761683369  |
| O | 8.427895947741  | -4.494591320808 | -3.238763890593 |
| O | 2.380993278683  | 3.039801732250  | 1.166339965615  |
| O | 2.448012727413  | 1.937975589860  | 0.190079199349  |
| O | 10.346495443530 | 6.042226771075  | 1.274387377658  |



|    |                 |                 |                 |
|----|-----------------|-----------------|-----------------|
| O  | 12.372985374122 | -4.586722509557 | -3.116592336881 |
| O  | 6.541442425052  | 3.072648668167  | 1.161483285324  |
| O  | 6.557151962708  | 1.965209794475  | 0.193790838708  |
| Ge | 12.369471715075 | -3.140156118723 | -1.892081672148 |
| Ge | 6.409670490893  | 4.662761004038  | -0.031487795806 |
| Ge | 10.350226696167 | 4.643518140695  | -0.013440203646 |
| Ge | 4.454279483987  | -3.113575051473 | -1.931202814711 |
| Ge | 8.426170219149  | -3.083898035836 | -1.964090377227 |
| Ge | 2.428593345577  | 4.643239153909  | 0.005027832394  |
| TV | 11.895639410130 | 0.000000000000  | 0.000000000000  |
| TV | 1.975764262482  | 6.197354654928  | -0.000000000000 |
| TV | -2.014289294446 | 3.449625853828  | 3.302694609490  |

# EQ-GeO<sub>2</sub> 107

|    |                 |                 |                 |
|----|-----------------|-----------------|-----------------|
| O  | 1.452585030589  | 3.665347257608  | 3.431089260843  |
| O  | 4.088213877868  | 1.293660021187  | -6.169306043223 |
| O  | -3.659327849019 | 0.027339380156  | 1.516084500956  |
| O  | 1.441319901342  | 2.243533404230  | -0.421600629529 |
| O  | 6.584936785870  | 3.667344700311  | 3.433451266012  |
| O  | 9.220439202730  | 1.298156349499  | -6.117238249479 |
| O  | 1.471538773157  | 0.024303009064  | 1.485245982337  |
| O  | 6.572754259779  | 2.245390327735  | -0.418127888783 |
| O  | 11.716345378719 | 3.669383815731  | 3.459523109341  |
| O  | 14.351275286270 | 1.293477070110  | -6.169188880087 |
| O  | 6.604434310215  | 0.026044683132  | 1.491344784204  |
| O  | 11.704797298827 | 2.248231208593  | -0.392097868474 |
| Ge | 15.092585436796 | -0.394767816521 | -2.339204797138 |
| Ge | 7.379852198008  | 1.685074745620  | 1.524490164710  |
| Ge | 12.512029866491 | 1.686420630924  | 1.529827034029  |
| Ge | 4.830774339780  | -0.393654004023 | -2.340235828724 |
| Ge | 9.961924467375  | -0.390380000671 | -2.303893511187 |
| Ge | 2.248057088353  | 1.683059661648  | 1.509208120480  |
| TV | 15.394582871591 | 0.000000000000  | 0.000000000003  |
| TV | 2.637212624524  | 4.606680570366  | 0.000000000003  |
| TV | -0.023602494977 | -0.027215771943 | 3.843461461014  |

# EQ-GeO<sub>2</sub> 108

|    |                 |                 |                 |
|----|-----------------|-----------------|-----------------|
| O  | 2.113272794397  | 2.827181635875  | 1.385235797586  |
| O  | 6.510710557939  | -1.656493566777 | -2.068745946602 |
| O  | -2.667052151170 | 3.369829933072  | 0.752914882664  |
| O  | -0.288809784995 | 2.395331078870  | 0.022225832896  |
| O  | 2.958527164304  | 3.920265503101  | 3.357747143085  |
| O  | 6.943511042904  | -0.726220234383 | 0.535721879508  |
| O  | -2.403383596879 | 5.056232774264  | 4.081603850988  |
| O  | -0.185095774944 | 3.612366410099  | 2.784705479720  |
| O  | 2.760459575821  | 3.997270653964  | 6.374579459709  |
| O  | 7.024176494453  | 0.232948668316  | 3.455267557356  |
| O  | -2.279048505277 | 4.621663036086  | 7.227005879954  |
| O  | 0.465737339926  | 4.432824313056  | 5.579869179622  |
| Ge | 7.777168324787  | -0.321790181967 | 5.092635814519  |
| Ge | -0.983380283095 | 3.463962523332  | 4.643844152833  |
| Ge | 0.984564116553  | 3.376135232595  | 7.316083553052  |
| Ge | 7.037025305920  | -2.387008893701 | -0.368874139709 |
| Ge | 7.182752549179  | -1.252612926886 | 2.332479159543  |
| Ge | -1.364096065959 | 2.223789139076  | 1.722230320260  |
| TV | 6.065605991768  | -0.000000000000 | -0.000000000000 |
| TV | 0.285606524362  | 5.773428979350  | 0.000000000003  |

|                           |                 |                 |                 |
|---------------------------|-----------------|-----------------|-----------------|
| TV                        | 1.528240209504  | 2.667551098804  | 8.390325888196  |
| # EQ-GeO <sub>2</sub> 109 |                 |                 |                 |
| O                         | 4.717592187014  | 6.703250690461  | 0.913538491031  |
| O                         | 4.330828075483  | -4.875268875139 | -4.230289490615 |
| O                         | -4.542980872639 | -0.343026064867 | 0.288569197296  |
| O                         | 0.083378567179  | 3.223877761974  | 0.850483329229  |
| O                         | 8.387024896308  | 6.701176021914  | 0.912178499910  |
| O                         | 8.000631627354  | -4.877188184030 | -4.231684977629 |
| O                         | -0.882074843010 | -0.338570479123 | 0.289385091472  |
| O                         | 3.749346878050  | 3.222297656650  | 0.847518478036  |
| O                         | 12.049354881930 | 6.702272183091  | 0.914269384655  |
| O                         | 11.664845991738 | -4.875515878319 | -4.231794093674 |
| O                         | 2.782445021649  | -0.338954143672 | 0.287692438491  |
| O                         | 7.400879019945  | 3.218576344653  | 0.848417170383  |
| Ge                        | 10.450809154880 | -1.299243140464 | -1.421598072326 |
| Ge                        | 5.917903820868  | 4.596802391370  | 1.264113763725  |
| Ge                        | 9.587186690250  | 4.600424927597  | 1.261770368105  |
| Ge                        | 3.120465874295  | -1.299045160241 | -1.422761568191 |
| Ge                        | 6.784132681841  | -1.302266542447 | -1.421323389103 |
| Ge                        | 2.259464816782  | 4.600162552401  | 1.261910835330  |
| TV                        | 10.994349811261 | -0.000000000006 | 0.000000000003  |
| TV                        | 0.734653421465  | 6.476165213250  | 0.000000000001  |
| TV                        | 0.601471036957  | 3.100417641841  | 3.398045105191  |

|                           |                 |                 |                 |
|---------------------------|-----------------|-----------------|-----------------|
| # EQ-GeO <sub>2</sub> 110 |                 |                 |                 |
| O                         | -0.821604512145 | 2.951890370455  | 2.972815501982  |
| O                         | 5.724987825520  | -3.715922887965 | -4.534809564921 |
| O                         | -1.956993389092 | 2.662477857479  | 2.121848984428  |
| O                         | 0.392475187374  | 2.818009728621  | 0.249207604575  |
| O                         | -0.779455058652 | 6.918001319825  | 2.972822692501  |
| O                         | 5.767009549581  | 0.250356168391  | -4.534760273161 |
| O                         | -1.914814763049 | 6.629027469361  | 2.121764751135  |
| O                         | 0.434633169732  | 6.784224279858  | 0.249409054914  |
| O                         | -0.737464478385 | 10.884251784850 | 2.973019624508  |
| O                         | 5.809048651905  | 4.216815191163  | -4.534779776639 |
| O                         | -1.872800334645 | 10.594993689451 | 2.121950405197  |
| O                         | 0.476586359874  | 10.750498669556 | 0.249772811184  |
| Ge                        | 5.953233058409  | 6.127856378386  | -4.886225032505 |
| Ge                        | 0.714029913384  | 8.339266862017  | 1.653827572743  |
| Ge                        | 0.756372593508  | 12.305338380995 | 1.654624852134  |
| Ge                        | 5.869042680199  | -1.804978287886 | -4.886318051038 |
| Ge                        | 5.911198713503  | 2.161277828284  | -4.886133224571 |
| Ge                        | 0.671943831190  | 4.372811241633  | 1.653845050017  |
| TV                        | 3.922244415790  | -0.000000000001 | 0.000000000003  |
| TV                        | 0.125928464466  | 11.898875646658 | -0.000000000006 |
| TV                        | -3.471271388940 | 4.356758371638  | 4.886044916347  |

|                           |                 |                  |                 |
|---------------------------|-----------------|------------------|-----------------|
| # EQ-GeO <sub>2</sub> 111 |                 |                  |                 |
| O                         | 3.549902827976  | 3.791777137933   | 0.762345501678  |
| O                         | 9.000656275804  | -14.096470306713 | -5.178536528108 |
| O                         | -4.117670070208 | 11.422480905387  | 3.709842240614  |
| O                         | 0.768946003310  | 2.601342941024   | -1.025844809930 |
| O                         | 3.558413748776  | 6.940421676154   | 3.109044855049  |
| O                         | 9.004418456035  | -10.845721435181 | -2.757834948234 |
| O                         | -4.127614785764 | 14.598050716729  | 6.082776064643  |
| O                         | 0.804364835693  | 5.770596712532   | 1.345553504289  |

|    |                 |                 |                 |
|----|-----------------|-----------------|-----------------|
| O  | 3.579525150963  | 10.075582162522 | 5.458112345941  |
| O  | 9.025553796735  | -7.709248202064 | -0.408051771928 |
| O  | -4.120047329862 | 17.767911813532 | 8.446569862998  |
| O  | 0.812371411779  | 8.945863441171  | 3.708850242405  |
| Ge | 1.675516045316  | 5.832176849987  | 4.588471478030  |
| Ge | 0.497098206693  | 7.127031717317  | 2.835168889183  |
| Ge | 0.517733612729  | 10.301607102290 | 5.202351633827  |
| Ge | 1.665147634506  | -0.522505817449 | -0.152835643677 |
| Ge | 1.671728553054  | 2.646840305694  | 2.210314408344  |
| Ge | 0.487476600382  | 3.957738558221  | 0.470334832096  |
| TV | 4.910914419843  | -0.000000000002 | 0.000000000001  |
| TV | 4.308988077813  | 7.411417710270  | 0.000000000001  |
| TV | 0.030405884270  | 9.525606547139  | 7.108728125077  |

# EQ-GeO<sub>2</sub> 112

|    |                 |                 |                 |
|----|-----------------|-----------------|-----------------|
| O  | 2.625116061830  | 3.537987762547  | 0.330668742691  |
| O  | 2.805411038528  | 0.017658952389  | -1.653094703650 |
| O  | -4.776542746695 | 2.028630034695  | 1.752731680834  |
| O  | 3.283245648170  | 0.987030315290  | -0.601177826837 |
| O  | 4.671588977847  | 6.914169754258  | 0.330693502232  |
| O  | 4.851844056516  | 3.393864244310  | -1.653103430451 |
| O  | -2.730202400352 | 5.404981379144  | 1.752657104793  |
| O  | 5.329691194287  | 4.363258800934  | -0.601203722496 |
| O  | 6.717897236979  | 10.290432986871 | 0.330626667840  |
| O  | 6.898274791375  | 6.770118920743  | -1.653090287105 |
| O  | -0.683782450997 | 8.781183580802  | 1.752675369694  |
| O  | 7.376108137532  | 7.739501811285  | -0.601186139805 |
| Ge | 8.482824561744  | 5.873628436826  | -2.071764627859 |
| Ge | 3.729614064784  | 5.189430812507  | -0.097168406063 |
| Ge | 5.776003245379  | 8.565631291404  | -0.097169519534 |
| Ge | 4.389954347601  | -0.878849144701 | -2.071790697999 |
| Ge | 6.436412091286  | 2.497389423117  | -2.071768822350 |
| Ge | 1.683159869769  | 1.813174630107  | -0.097139427875 |
| TV | 6.086132814215  | -0.000000000002 | 0.000000000001  |
| TV | 6.139275591051  | 10.128684045324 | 0.000000000003  |
| TV | 1.882277313375  | 1.260663122480  | 4.247821679363  |

# EQ-GeO<sub>2</sub> 113

|    |                 |                 |                 |
|----|-----------------|-----------------|-----------------|
| O  | 2.656127788862  | 3.522304894968  | 0.302102776671  |
| O  | 2.915454014780  | -0.104583389537 | -1.550027389009 |
| O  | -4.929413570203 | 2.034052755949  | 1.702878524870  |
| O  | 3.327763341879  | 1.013482008389  | -0.631302854303 |
| O  | 4.607838380427  | 6.950221888310  | 0.302254985330  |
| O  | 4.866723185921  | 3.323812729677  | -1.550434643645 |
| O  | -2.977832406363 | 5.462507027662  | 1.703071375231  |
| O  | 5.278866802011  | 4.441481063055  | -0.631128656587 |
| O  | 6.557481279762  | 10.378517390174 | 0.301931772089  |
| O  | 6.818020596231  | 6.752335352339  | -1.550239400695 |
| O  | -1.027755160435 | 8.890751494704  | 1.702993012778  |
| O  | 7.229635793270  | 7.870806074901  | -0.631333856418 |
| Ge | 8.441583570741  | 5.964059975919  | -2.025489044209 |
| Ge | 3.660553009255  | 5.229548653028  | -0.137851491883 |
| Ge | 5.610845644345  | 8.657732505280  | -0.137925405306 |
| Ge | 4.539052827065  | -0.892587271419 | -2.025716058370 |
| Ge | 6.490432106528  | 2.535719426924  | -2.025614072135 |
| Ge | 1.709331997799  | 1.801119590430  | -0.137774118340 |
| TV | 6.212274565927  | -0.000000000002 | 0.000000000001  |

|    |                |                 |                |
|----|----------------|-----------------|----------------|
| TV | 5.852956413107 | 10.284548431318 | 0.000000000003 |
| TV | 1.937205376232 | 1.222430232364  | 4.163547637962 |

# EQ-GeO<sub>2</sub> 114

|    |                 |                 |                 |
|----|-----------------|-----------------|-----------------|
| O  | 2.738528797767  | 3.529704664305  | 0.243322760987  |
| O  | 5.784576675161  | -2.770858137738 | -2.760107288888 |
| O  | -2.978861773604 | 2.861294588069  | 1.329556541608  |
| O  | 0.294389854177  | 2.582152033309  | -0.784949911324 |
| O  | 4.269215672978  | 8.247219710080  | 0.242980334923  |
| O  | 7.346595703984  | 1.937624722250  | -2.722469729184 |
| O  | -1.446719259687 | 7.587708831844  | 1.335279518423  |
| O  | 1.819227097767  | 7.304591909731  | -0.781195034915 |
| O  | 5.795958753912  | 12.937898065787 | 0.222544565162  |
| O  | 8.862540992843  | 6.659166401813  | -2.726893856853 |
| O  | 0.076394228644  | 12.292105125761 | 1.317539718409  |
| O  | 3.353206782751  | 11.988368842971 | -0.798015509749 |
| Ge | 8.380351773387  | 7.932689602625  | -1.512777364986 |
| Ge | 1.426261589681  | 7.771755490295  | 0.959558219877  |
| Ge | 2.954239662134  | 12.472274886600 | 0.938201490887  |
| Ge | 5.311215313245  | -1.510752771809 | -1.530210999515 |
| Ge | 6.854704505681  | 3.213121743206  | -1.514472252413 |
| Ge | -0.106706165089 | 3.051102051087  | 0.955329824685  |
| TV | 4.993411242928  | 0.000000000000  | 0.000000000003  |
| TV | 4.601818021870  | 14.133161081469 | 0.000000000012  |
| TV | -2.145523215798 | 2.951657953182  | 3.679725685987  |

# EQ-GeO<sub>2</sub> 115

|    |                 |                 |                 |
|----|-----------------|-----------------|-----------------|
| O  | 2.437603877124  | 3.260143422103  | 1.440828188228  |
| O  | 6.329189559980  | -0.802619023845 | -2.490347798054 |
| O  | -6.210733727124 | 1.950415260921  | 1.718575520316  |
| O  | -0.865566957997 | 3.490735013136  | -0.707686443103 |
| O  | 3.732426293778  | 4.657139358368  | 3.720651606407  |
| O  | 7.624070410410  | 0.594773705136  | -0.211119036638 |
| O  | -4.916011632100 | 3.347187787629  | 3.998200175251  |
| O  | 0.429548532753  | 4.887710783326  | 1.572088758838  |
| O  | 5.027196825683  | 6.054579024113  | 6.000164474822  |
| O  | 8.918987269230  | 1.991277749464  | 2.068505717823  |
| O  | -3.620833494960 | 4.744387210048  | 6.277788139795  |
| O  | 1.724218949615  | 6.284587780795  | 3.851690073634  |
| Ge | 7.402453508100  | 1.516524896862  | 3.186783925837  |
| Ge | 1.836839326913  | 4.720202592753  | 2.813407390339  |
| Ge | 3.131665019232  | 6.117376568884  | 5.092920838079  |
| Ge | 4.812458283523  | -1.277300830223 | -1.372353302909 |
| Ge | 6.107586375472  | 0.119758865132  | 0.907131017877  |
| Ge | 0.541800743264  | 3.323408683092  | 0.533664853176  |
| TV | 6.162761395383  | -0.000000000001 | -0.000000000005 |
| TV | -2.791280680693 | 6.423306867608  | 0.000000000004  |
| TV | 3.884528484897  | 4.191000686629  | 6.838943686423  |

# EQ-GeO<sub>2</sub> 116

|   |                 |                 |                 |
|---|-----------------|-----------------|-----------------|
| O | 6.464347183071  | 0.633531250233  | 3.896683634851  |
| O | 3.709255975072  | -1.339784927053 | -4.442128931279 |
| O | -4.908976722511 | 1.703459313518  | 1.482755026085  |
| O | -2.023460657135 | 4.432809672116  | -3.006680703529 |
| O | 9.248823739885  | 4.619766125475  | 3.892194321213  |
| O | 6.483057856755  | 2.598976140105  | -4.445199084559 |
| O | -2.121890797288 | 5.670541641823  | 1.484960119480  |

|    |                 |                 |                 |
|----|-----------------|-----------------|-----------------|
| O  | 0.741694161412  | 8.421719484597  | -3.014018675972 |
| O  | 12.025400111168 | 8.587079679521  | 3.902340479453  |
| O  | 9.267032930921  | 6.594020792530  | -4.430800362175 |
| O  | 0.632905640874  | 9.622795641230  | 1.470108925774  |
| O  | 3.493322546197  | 12.352728807619 | -2.998498720126 |
| Ge | 10.432774512956 | 7.543902072419  | -1.306477784218 |
| Ge | 5.903129872073  | 6.394170505884  | 1.049958245141  |
| Ge | 8.650838422003  | 10.365881014139 | 1.038608368331  |
| Ge | 4.874342586579  | -0.389596211056 | -1.317508525302 |
| Ge | 7.653980595483  | 3.575169109662  | -1.319185249063 |
| Ge | 3.118168271932  | 2.418714436617  | 1.043284372039  |
| TV | 6.404953128257  | -0.000000000002 | 0.000000000004  |
| TV | 8.307770185862  | 11.904350993427 | 0.000000000006  |
| TV | 2.810472119307  | 0.606743933488  | 3.847635641479  |

# EQ-GeO<sub>2</sub> 117

|    |                 |                 |                 |
|----|-----------------|-----------------|-----------------|
| O  | 0.657250903232  | 1.252364823858  | 0.604593381780  |
| O  | 4.195076117850  | -2.841685433795 | -2.030443122447 |
| O  | -0.462888889292 | 1.668092645129  | -0.312586352490 |
| O  | 1.770324107334  | 3.664738643772  | -1.040445197796 |
| O  | 1.140784307606  | 3.257185601348  | 3.915105100324  |
| O  | 4.679831198119  | -0.781837775231 | 1.302987408209  |
| O  | 0.029069776701  | 3.652554187378  | 2.977980118259  |
| O  | 2.224542488115  | 5.717015435980  | 2.307631241592  |
| O  | 1.621932881601  | 5.456240759431  | 7.317180451842  |
| O  | 5.104371974365  | 1.267472525626  | 4.657835400294  |
| O  | 0.525974827696  | 5.783156573486  | 6.337945665444  |
| O  | 2.791490993319  | 7.803304126893  | 5.616278056723  |
| Ge | 5.242152682518  | 4.959973226350  | 7.060864467397  |
| Ge | 2.645919299425  | 4.111189765019  | 3.211829508919  |
| Ge | 3.154075426868  | 6.195773036546  | 6.543443355914  |
| Ge | 4.259273591000  | 0.822867720347  | 0.398717552852  |
| Ge | 4.734346166949  | 2.876733418724  | 3.733646516991  |
| Ge | 2.174828429378  | 2.058518906261  | -0.128643080890 |
| TV | 6.228308561637  | -0.000000000006 | 0.000000000004  |
| TV | 4.123293623277  | 4.265974407785  | 0.000000000008  |
| TV | 1.455867282048  | 6.197733537003  | 10.002372542280 |

# EQ-GeO<sub>2</sub> 118

|    |                 |                 |                 |
|----|-----------------|-----------------|-----------------|
| O  | 2.712411370022  | 1.756111406909  | -1.461424079291 |
| O  | 2.785751168707  | 0.291073892034  | -1.807265799395 |
| O  | -5.095497400821 | 2.097009605005  | 3.359986618046  |
| O  | 0.343495600274  | 3.339462342444  | -0.298320424045 |
| O  | 2.299227068083  | 3.559056371215  | 1.753963491922  |
| O  | 2.370929458325  | 2.094314239578  | 1.407345166616  |
| O  | -5.509515263674 | 3.901872892797  | 6.575203679189  |
| O  | -0.069618393444 | 5.143702419894  | 2.916549734227  |
| O  | 1.884242391684  | 5.365245107590  | 4.968734323433  |
| O  | 1.957706574180  | 3.900375707012  | 4.622869599227  |
| O  | -5.923740052307 | 5.706257455667  | 9.790189316955  |
| O  | -0.484643006836 | 6.948610720279  | 6.131769596775  |
| Ge | 4.537523812897  | 1.962887886330  | 5.326807064352  |
| Ge | 0.929072996451  | 3.672979306001  | 3.051395381280  |
| Ge | 0.514337117546  | 5.478086735699  | 6.266549496736  |
| Ge | 5.365496960066  | -1.646626466413 | -1.103312657285 |
| Ge | 4.952388168422  | 0.157834329193  | 2.112199017759  |
| Ge | 1.342138064321  | 1.868736480693  | -0.163939153035 |

|    |                 |                 |                 |
|----|-----------------|-----------------|-----------------|
| TV | 5.169702987397  | -0.000000000000 | -0.000000000000 |
| TV | -1.463058601378 | 5.602724127072  | 0.000000000000  |
| TV | -1.242324999771 | 5.413720146845  | 9.645086726963  |

# EQ-GeO<sub>2</sub> 119

|    |                 |                 |                 |
|----|-----------------|-----------------|-----------------|
| O  | 3.741481228577  | 1.849560734717  | -1.091969767292 |
| O  | 3.886595993493  | 0.584209152131  | -1.855495562749 |
| O  | -5.689570483508 | 1.241990473565  | 3.257292800674  |
| O  | 1.370464510102  | 3.397684572629  | -0.361599666541 |
| O  | 2.428289896190  | 2.814373323368  | 2.480738350901  |
| O  | 2.563893127084  | 1.545565061257  | 1.720298106055  |
| O  | -7.000426810829 | 2.213282012968  | 6.832491475635  |
| O  | 0.058585295257  | 4.372142812631  | 3.214640524513  |
| O  | 1.114757885109  | 3.794825488154  | 6.060609366994  |
| O  | 1.259416608861  | 2.528928681253  | 5.298318349836  |
| O  | -8.311119639337 | 3.179174796402  | 10.396619554879 |
| O  | -1.255697463127 | 5.344682950641  | 6.793066685923  |
| Ge | 3.225428486917  | 1.201478609869  | 5.417665986164  |
| Ge | 0.784996248910  | 2.755699853057  | 3.434237383289  |
| Ge | -0.528920639723 | 3.728498230314  | 7.012412954359  |
| Ge | 5.846153744312  | -0.748774700350 | -1.742590046102 |
| Ge | 4.540040732710  | 0.228970446148  | 1.840498158871  |
| Ge | 2.095341503233  | 1.780046719628  | -0.145280898673 |
| TV | 5.546147141030  | -0.000000000000 | -0.000000000000 |
| TV | 1.884895210294  | 5.299188638079  | -0.000000000000 |
| TV | -3.940747455830 | 2.916175384724  | 10.731285563678 |

# EQ-GeO<sub>2</sub> 120

|    |                 |                 |                 |
|----|-----------------|-----------------|-----------------|
| O  | 3.921387557380  | 2.052552167132  | -1.089365064608 |
| O  | 4.107781448925  | 0.804206439271  | -1.873064945715 |
| O  | -5.516807978023 | 1.308588429063  | 3.176760442850  |
| O  | 1.449100159617  | 3.523388459016  | -0.457994537419 |
| O  | 2.498751894408  | 2.973074687704  | 2.460133820584  |
| O  | 2.684871086188  | 1.724460052304  | 1.676748485468  |
| O  | -6.939200256776 | 2.229367012065  | 6.726361660303  |
| O  | 0.026315054750  | 4.443840133146  | 3.091377324064  |
| O  | 1.076144670487  | 3.893858066886  | 6.009933726218  |
| O  | 1.262403143734  | 2.645312446797  | 5.226543680362  |
| O  | -8.361901779083 | 3.150025943552  | 10.275867161822 |
| O  | -1.396319871626 | 5.364872117262  | 6.641232089750  |
| Ge | 3.151473256835  | 1.260903036420  | 5.298383073797  |
| Ge | 0.822568995710  | 2.866027437871  | 3.353979308273  |
| Ge | -0.600047248327 | 3.786959970356  | 6.903623447265  |
| Ge | 5.996601467123  | -0.580727358352 | -1.801071859078 |
| Ge | 4.574022692221  | 0.340113414314  | 1.748675670430  |
| Ge | 2.245147714441  | 1.945383689678  | -0.195736777315 |
| TV | 5.486477340978  | 0.000000000000  | -0.000000000000 |
| TV | 1.768987935426  | 5.287645189393  | 0.000000000000  |
| TV | -4.267921030224 | 2.762149965757  | 10.649141254893 |

# EQ-GeO<sub>2</sub> 121

|   |                 |                 |                 |
|---|-----------------|-----------------|-----------------|
| O | 3.375849724990  | 4.785565026538  | 1.364931594987  |
| O | 2.160866503056  | -2.470755817533 | -2.597051960988 |
| O | -1.072922869647 | 2.226878272531  | 0.662693131767  |
| O | 0.155892729806  | 2.523602253639  | -0.017222386022 |
| O | 4.760713768009  | 5.896362468969  | 4.068295827904  |
| O | 3.550124755219  | -1.390155009457 | 0.138782576052  |

|    |                |                 |                 |
|----|----------------|-----------------|-----------------|
| O  | 0.335372594541 | 3.327137559879  | 3.400775663107  |
| O  | 1.561238975014 | 3.613482226154  | 2.710248502182  |
| O  | 6.108420290449 | 6.972019175438  | 6.801082609214  |
| O  | 4.954839362770 | -0.322428305255 | 2.773284641817  |
| O  | 1.725584269062 | 4.410924459317  | 6.053684104053  |
| O  | 2.932091093648 | 4.775568530721  | 5.360087758377  |
| Ge | 6.680116012838 | 0.646331246131  | 3.445483872417  |
| Ge | 3.196451509067 | 4.932094819980  | 3.322684219276  |
| Ge | 4.559905635002 | 6.001010867046  | 6.036025468313  |
| Ge | 3.889732573169 | -1.507229825516 | -1.934637482183 |
| Ge | 5.318407786388 | -0.447224902349 | 0.726274731691  |
| Ge | 1.782699650815 | 3.839679767610  | 0.650270399058  |
| TV | 4.035706675721 | -0.000000000002 | 0.000000000001  |
| TV | 1.858068049980 | 7.153869561958  | 0.000000000001  |
| TV | 4.143127363554 | 3.225769722452  | 8.107221616936  |

# EQ-GeO<sub>2</sub> 122

|    |                 |                 |                 |
|----|-----------------|-----------------|-----------------|
| O  | -1.730279196727 | 0.717581937180  | 0.453816028357  |
| O  | 1.152980281260  | -0.305229246448 | -0.319909893672 |
| O  | 1.414269534486  | 0.888402192413  | -1.163631082602 |
| O  | 0.262427065136  | 2.127887035892  | 1.005769003294  |
| O  | -0.647944669658 | 4.410722883048  | 0.453786845671  |
| O  | 2.235300225321  | 3.387923592478  | -0.319918132101 |
| O  | 2.496600464747  | 4.581549212506  | -1.163639870891 |
| O  | 1.344748343243  | 5.821033151490  | 1.005773724314  |
| O  | 0.434363703291  | 8.103858822478  | 0.453815960626  |
| O  | 3.317619117167  | 7.081066733774  | -0.319923127173 |
| O  | 3.578931779074  | 8.274697430038  | -1.163629108679 |
| O  | 2.427069363120  | 9.514155380604  | 1.005773812935  |
| Ge | 2.102857579521  | 7.589978409858  | 1.114870255079  |
| Ge | -0.109243130114 | 6.231397913939  | -0.478600904329 |
| Ge | 0.973056676107  | 9.924526973095  | -0.478586205536 |
| Ge | -0.061793746948 | 0.203691539129  | 1.114866472771  |
| Ge | 1.020534499203  | 3.896840744384  | 1.114863889544  |
| Ge | -1.191581521733 | 2.538254808525  | -0.478592936576 |
| TV | 5.651947128949  | 0.000000000001  | -0.000000000004 |
| TV | 3.246961687510  | 11.079421956935 | -0.000000000015 |
| TV | -0.836547143427 | -0.551037017084 | 4.056910644287  |

# EQ-GeO<sub>2</sub> 123

|    |                 |                 |                 |
|----|-----------------|-----------------|-----------------|
| O  | 2.037905761014  | 1.534779584503  | 1.155136743268  |
| O  | 2.732008609075  | -1.359770584185 | -3.312804829223 |
| O  | -0.845475430922 | 1.477249489106  | 2.227911120064  |
| O  | 0.945126339480  | 3.978845780536  | -1.383426640259 |
| O  | 3.073845370191  | 2.472039702170  | 4.702317251190  |
| O  | 3.768103254416  | -0.422541326475 | 0.234267261436  |
| O  | 0.190454892229  | 2.414624859908  | 5.775043388394  |
| O  | 1.981455176036  | 4.916088133116  | 2.163571666911  |
| O  | 4.109868780126  | 3.409208738067  | 8.249615614088  |
| O  | 4.804273909669  | 0.514792592115  | 3.781581379870  |
| O  | 1.226419671708  | 3.351577502893  | 9.322466244826  |
| O  | 3.017434904485  | 5.853304717672  | 5.710959059647  |
| Ge | 5.611537330406  | 1.336157437575  | 5.355700261946  |
| Ge | 1.680474324628  | 4.936709641930  | 4.368352376376  |
| Ge | 2.716457520903  | 5.873829012705  | 7.915586450734  |
| Ge | 3.539351747047  | -0.538347775668 | -1.738733264546 |
| Ge | 4.575578054269  | 0.398905934611  | 1.808448438189  |

|    |                |                 |                 |
|----|----------------|-----------------|-----------------|
| Ge | 0.644155741354 | 3.999525381830  | 0.821162199826  |
| TV | 3.901398618115 | -0.000000000002 | 0.000000000001  |
| TV | 0.831052750488 | 6.329268145536  | 0.000000000001  |
| TV | 3.108166828196 | 2.811713354814  | 10.641614688125 |

# EQ-GeO<sub>2</sub> 124

|    |                 |                 |                 |
|----|-----------------|-----------------|-----------------|
| O  | 1.663058059209  | 2.327794332761  | 0.856953579620  |
| O  | 7.844365781070  | -2.422187640856 | -3.049789273781 |
| O  | -5.991233253968 | 6.623786118774  | 3.557087366420  |
| O  | 0.431544302772  | 0.456836146058  | -1.067130761067 |
| O  | 6.523502135306  | 2.332399845367  | 0.846783314069  |
| O  | 12.696500277947 | -2.436991225065 | -3.039233410709 |
| O  | -1.134893728074 | 6.622972134479  | 3.563607161908  |
| O  | 5.293401970372  | 0.456267837584  | -1.068541191639 |
| O  | 11.389158061718 | 2.325534995107  | 0.848027498904  |
| O  | 17.551640935881 | -2.432758258469 | -3.031718123107 |
| O  | 3.720906085654  | 6.622342704179  | 3.572640645708  |
| O  | 10.155331686796 | 0.462584211496  | -1.087744666702 |
| Ge | 15.739508318542 | -1.158309435269 | -1.484891244216 |
| Ge | 5.606643480685  | 2.240111151923  | -1.330555038530 |
| Ge | 10.472697626014 | 2.245675318004  | -1.346752623895 |
| Ge | 6.020749865733  | -1.158606063797 | -1.492899178241 |
| Ge | 10.886136655011 | -1.154456575363 | -1.495606575694 |
| Ge | 0.749397850920  | 2.238367567314  | -1.337016451950 |
| TV | 14.578221046374 | 0.000000000000  | -0.000000000000 |
| TV | 1.716723006958  | 4.741606946626  | 0.000000000000  |
| TV | -0.574883510496 | 3.474466163083  | 3.962994460857  |

# EQ-GeO<sub>2</sub> 125

|    |                 |                 |                 |
|----|-----------------|-----------------|-----------------|
| O  | 1.157654490904  | 1.885825526463  | 1.328249445794  |
| O  | 4.201645544366  | -1.396508910417 | -3.547716402583 |
| O  | -2.779828853218 | 0.897350017461  | 2.000877648490  |
| O  | 2.242515818951  | 2.810872770845  | -1.139982534793 |
| O  | 1.348722984506  | 3.471120817219  | 4.905798222717  |
| O  | 4.112671790883  | 0.200960785771  | 0.050583155622  |
| O  | -2.585193073573 | 2.525817672542  | 5.626335934698  |
| O  | 2.202858445219  | 4.423441549439  | 2.456770472860  |
| O  | 1.440007228744  | 5.177259329215  | 8.593806175817  |
| O  | 4.243045701283  | 1.819762473692  | 3.646545096219  |
| O  | -2.498258612626 | 4.082439430795  | 9.034121001006  |
| O  | 2.406309383407  | 6.033181936899  | 6.048568489743  |
| Ge | 4.099893442999  | 2.965414541066  | 5.292444540598  |
| Ge | 2.697822956539  | 4.920365060309  | 4.363554545582  |
| Ge | 2.844976021795  | 6.559561971372  | 7.950730413709  |
| Ge | 3.945783126390  | -0.266645581181 | -1.898926022096 |
| Ge | 3.910868571612  | 1.358258899027  | 1.711561942090  |
| Ge | 2.527436083345  | 3.309762515831  | 0.808684063096  |
| TV | 4.770686324485  | 0.000000000000  | -0.000000000000 |
| TV | 2.622714557034  | 4.772588764273  | -0.000000000000 |
| TV | 0.252273785774  | 4.856363269015  | 10.755374703751 |

# EQ-GeO<sub>2</sub> 126

|   |                 |                |                 |
|---|-----------------|----------------|-----------------|
| O | 3.787161470126  | 1.963584547236 | -1.211117406433 |
| O | 3.258670686466  | 0.935162770562 | -2.128358460053 |
| O | -2.012789603449 | 0.466193291552 | 2.738725863334  |
| O | 1.617641307548  | 3.967727219632 | -0.205475794544 |
| O | 6.854103313226  | 1.963578138593 | -1.211154757846 |



|    |                 |                 |                 |
|----|-----------------|-----------------|-----------------|
| O  | 6.325557598187  | 0.935161607877  | -2.128394948246 |
| O  | 1.054130912750  | 0.466247652496  | 2.738761404205  |
| O  | 4.684547313902  | 3.967723407925  | -0.205477734372 |
| O  | 9.921002744737  | 1.963574244199  | -1.211109579078 |
| O  | 9.392491709559  | 0.935124046122  | -2.128348395874 |
| O  | 4.121048909685  | 0.466255869180  | 2.738800438337  |
| O  | 7.751479293597  | 3.967752846281  | -0.205465654734 |
| Ge | 9.980882564912  | -0.878747623414 | -1.971243215517 |
| Ge | 5.305588595468  | 2.251637246536  | 0.354058943955  |
| Ge | 8.372459163905  | 2.251598320076  | 0.354025322652  |
| Ge | 3.847020101167  | -0.878713134011 | -1.971223110983 |
| Ge | 6.913986455288  | -0.878713663319 | -1.971250690453 |
| Ge | 2.238655716162  | 2.251561532894  | 0.354022852429  |
| TV | 9.200781200570  | -0.000000000000 | -0.000000000000 |
| TV | 0.244549680955  | 4.868823997602  | 0.000000000000  |
| TV | -1.237419529750 | 1.676655785519  | 5.721327684929  |

# EQ-GeO<sub>2</sub> 127

|    |                 |                 |                 |
|----|-----------------|-----------------|-----------------|
| O  | 0.155562539046  | 1.081599085289  | -1.687193956085 |
| O  | -2.698482835822 | 1.110418252107  | 2.707295937617  |
| O  | -1.803095533393 | 1.774459259243  | 0.172470318328  |
| O  | -1.002136063337 | 0.179827137789  | -5.829342763813 |
| O  | 0.328977505122  | 0.227102443318  | -0.683698414184 |
| O  | -1.253349358673 | 1.462603699479  | 2.826687520282  |
| O  | 5.883227914794  | 1.202517128552  | -1.232652292590 |
| O  | 3.018293750014  | 1.149302232207  | 0.375533842382  |
| O  | 2.792529716144  | 2.582813209362  | 2.559945121316  |
| O  | 4.147961758027  | -0.199420479199 | -6.419931650789 |
| O  | 5.554321701014  | -0.068276074297 | -1.337995669020 |
| O  | 1.029064337437  | 0.191365940663  | 2.195980234521  |
| Ge | 2.853968696122  | 0.448812055921  | 2.416237617639  |
| Ge | -0.175083876930 | -2.436418239031 | 0.829414582730  |
| Ge | -2.237158493148 | -0.811000830668 | 3.250182295301  |
| Ge | 5.776769552153  | -1.011680291271 | 0.707534730230  |
| Ge | -0.340223409693 | 0.880837988418  | 1.203509425567  |
| Ge | 2.705938569498  | -0.590800670823 | -0.848416340647 |
| TV | 10.176945240688 | 0.000000000000  | 0.000000000000  |
| TV | -3.358073160584 | 3.894450366006  | 0.000000000001  |
| TV | -0.267981575879 | -1.094337937367 | 7.110322966242  |

# EQ-GeO<sub>2</sub> 128

|    |                |                 |                 |
|----|----------------|-----------------|-----------------|
| O  | 2.863757418400 | 2.579546950916  | 1.041912582603  |
| O  | 0.980366907083 | -0.494177006312 | -0.718871075210 |
| O  | 0.988229797285 | 0.923337389795  | -0.344468527168 |
| O  | 1.002995453588 | 3.634978816672  | -0.804405012421 |
| O  | 2.879458828308 | 3.715638214002  | 4.116076256422  |
| O  | 0.995687069138 | 0.641902253454  | 2.355631734844  |
| O  | 1.003940452346 | 2.059488951101  | 2.729748606083  |
| O  | 1.018809734125 | 4.771074815595  | 2.269800538303  |
| O  | 2.895184735069 | 4.851555865302  | 7.190362998151  |
| O  | 1.011394046302 | 1.778010604111  | 5.429761890220  |
| O  | 1.019776231358 | 3.195617378758  | 5.803968939657  |
| O  | 1.034461383671 | 5.907208639099  | 5.344011654954  |
| Ge | 2.875477495903 | 1.631005316551  | 4.199878286568  |
| Ge | 1.022294944005 | 4.426844709756  | 4.189545579023  |
| Ge | 1.037975131549 | 5.562851861566  | 7.263749074230  |
| Ge | 2.843988083459 | -0.641180138665 | -1.948586109688 |

|    |                |                 |                |
|----|----------------|-----------------|----------------|
| Ge | 2.860407337950 | 0.494902729073  | 1.125834020746 |
| Ge | 1.006550931829 | 3.290708139314  | 1.115340272177 |
| TV | 3.719553967546 | -0.000000000002 | 0.000000000001 |
| TV | 1.897473713466 | 6.797441570341  | 0.000000000001 |
| TV | 0.047212565600 | 3.408183271381  | 9.222645360829 |

# EQ-GeO<sub>2</sub> 129

|    |                 |                 |                 |
|----|-----------------|-----------------|-----------------|
| O  | 5.887319501521  | 1.120415224716  | 4.137327324230  |
| O  | 3.964835161303  | -1.689875429376 | -4.767020263899 |
| O  | -4.372983410900 | 1.931187682835  | 1.480884239519  |
| O  | -1.405958719699 | 3.949612944362  | -3.200697509064 |
| O  | 8.208805519572  | 2.089102288330  | 8.435020305046  |
| O  | 6.274764026313  | -0.753291500543 | -0.461946855377 |
| O  | -2.041442632032 | 2.926035300659  | 5.787085226114  |
| O  | 0.849997066142  | 4.811254823214  | 1.115402587070  |
| O  | 10.507413667113 | 3.013943564056  | 12.708329818576 |
| O  | 8.587197870608  | 0.215907669957  | 3.823028001463  |
| O  | 0.289306062078  | 3.899385352672  | 10.100995849608 |
| O  | 3.182860720286  | 5.822318725947  | 5.369529048533  |
| Ge | 9.458612616911  | 1.671379284718  | 7.079267082035  |
| Ge | 4.601970681820  | 4.583336823960  | 5.592599053496  |
| Ge | 6.938801409052  | 5.547805564856  | 9.869311429334  |
| Ge | 4.856501365404  | -0.221530157904 | -1.484570409668 |
| Ge | 7.147946449063  | 0.688196665019  | 2.792983979821  |
| Ge | 2.286890709250  | 3.585512149088  | 1.308761315702  |
| TV | 5.904614625506  | -0.000000000000 | 0.000000000001  |
| TV | 2.479631829067  | 4.316111452201  | 0.000000000001  |
| TV | 6.930461391509  | 2.847889221791  | 12.855726418971 |

# EQ-GeO<sub>2</sub> 130

|    |                  |                 |                 |
|----|------------------|-----------------|-----------------|
| O  | 9.858122720095   | 4.081220038477  | 2.608338889658  |
| O  | 4.055398642325   | -2.592564708445 | -4.629123507728 |
| O  | -11.290839564846 | 0.137964358221  | 0.131655253048  |
| O  | 1.473174594653   | 3.110649280634  | 0.171202199399  |
| O  | 11.441309817630  | 6.946596372610  | 2.591777800053  |
| O  | 5.622475601769   | 0.234714274408  | -4.749053675620 |
| O  | -9.731993213220  | 3.013975159442  | 0.012422234018  |
| O  | 3.038279607164   | 5.952355800954  | 0.168341023155  |
| O  | 12.984785636640  | 9.776646943991  | 2.627627348162  |
| O  | 7.183173567371   | 3.074271632044  | -4.630623280773 |
| O  | -8.158205208193  | 5.799863943798  | 0.121982761999  |
| O  | 4.614769252977   | 8.800962999756  | 0.164928116418  |
| Ge | 6.264880593800   | 4.256170323198  | -1.405363208380 |
| Ge | 4.441856218345   | 7.044326383101  | 0.804956796343  |
| Ge | 6.010113870803   | 9.888044214346  | 0.835155409570  |
| Ge | 3.104328580202   | -1.451066791095 | -1.319602916777 |
| Ge | 4.693051406350   | 1.369210428074  | -1.344197450205 |
| Ge | 2.878134872715   | 4.197698955469  | 0.819971663737  |
| TV | 6.930098913356   | -0.000000000001 | -0.000000000006 |
| TV | 4.710972682693   | 8.521224488949  | 0.000000000006  |
| TV | -0.039693953239  | 2.985892283804  | 4.945464036685  |

# EQ-GeO<sub>2</sub> 131

|   |                 |                 |                 |
|---|-----------------|-----------------|-----------------|
| O | -2.075693557499 | -0.875671978069 | -1.782610429618 |
| O | 2.648511390273  | -1.799729162346 | 0.006863018492  |
| O | 3.776310999936  | 0.271552656315  | -1.613553665791 |
| O | 0.780773330362  | -0.183944395227 | -1.736653329904 |

|    |                 |                 |                 |
|----|-----------------|-----------------|-----------------|
| O  | -2.618607477928 | -2.381699028454 | -0.078723983024 |
| O  | -2.073919491330 | -1.010797702590 | -0.329454896991 |
| O  | -2.856031465474 | 2.954253505799  | -1.506145122161 |
| O  | 2.018283895335  | 1.188142178349  | 0.545228473695  |
| O  | 2.622844054526  | 3.034297819385  | -1.773319957495 |
| O  | -0.066607177798 | 3.178085019598  | -1.193632882596 |
| O  | -4.087275169254 | 2.340206886335  | 0.273837270522  |
| O  | -2.868284551943 | 3.094623875707  | -0.040068532618 |
| Ge | 1.507177450258  | 3.357715007174  | -0.217573369545 |
| Ge | 4.831017190861  | -1.564233485996 | -2.436733950752 |
| Ge | -0.091433703664 | -1.852802470314 | -2.323681474007 |
| Ge | 4.156816630877  | 2.123278041028  | -1.716322360789 |
| Ge | 2.202440438581  | -0.201064079881 | -0.650859078963 |
| Ge | -0.888985761194 | 1.924089683279  | -2.269739963175 |
| TV | 8.753770895282  | -0.000000000000 | -0.000000000000 |
| TV | -2.145958142437 | 8.227011253275  | 0.000000000000  |
| TV | -2.562846646040 | -1.093734061606 | 4.135617563046  |

# EQ-GeO<sub>2</sub> 132

|    |                 |                 |                 |
|----|-----------------|-----------------|-----------------|
| O  | -1.995793000036 | -1.131757997842 | -1.815138424986 |
| O  | 2.554064587223  | -1.905209469249 | 0.126239419573  |
| O  | 3.787586867898  | 0.133620728394  | -1.568706508785 |
| O  | 0.810478405169  | -0.244548730713 | -1.684444999059 |
| O  | -3.161509193000 | -1.563600543642 | 0.138598163523  |
| O  | -1.934604153467 | -0.956121476208 | -0.337896671152 |
| O  | -2.938588231471 | 3.026450611568  | -1.511372876678 |
| O  | 2.051403001805  | 1.117335002470  | 0.594972561654  |
| O  | 2.699920736364  | 2.917206771789  | -1.777216712063 |
| O  | 0.012898526628  | 3.128061613024  | -1.189483364696 |
| O  | -4.013467210144 | 2.143946168164  | 0.257814986210  |
| O  | -3.058364947060 | 3.220036011738  | -0.057879263205 |
| Ge | 1.596547914677  | 3.301292007966  | -0.222444366621 |
| Ge | 4.852149258331  | -1.761075983050 | -2.264529166106 |
| Ge | -0.045448035789 | -1.857929944037 | -2.440386241770 |
| Ge | 4.212930160505  | 1.972683585347  | -1.712354388034 |
| Ge | 2.220485200895  | -0.297586927938 | -0.573434193946 |
| Ge | -0.934269564338 | 1.803355382842  | -2.041375798758 |
| TV | 8.796268313949  | -0.000000000000 | -0.000000000000 |
| TV | -1.968298277649 | 8.153412733348  | -0.000000000000 |
| TV | -2.629273991633 | -0.883360496063 | 4.166967555473  |

# EQ-GeO<sub>2</sub> 133

|    |                 |                 |                 |
|----|-----------------|-----------------|-----------------|
| O  | -1.924768239135 | -1.307630787560 | -1.788014018346 |
| O  | 2.642136369062  | -2.002204190025 | 0.173984751715  |
| O  | 3.833628459948  | -0.017451612953 | -1.608826178390 |
| O  | 0.841761051339  | -0.371272869629 | -1.622292484593 |
| O  | -3.105843290738 | -1.511328083817 | 0.199016260912  |
| O  | -1.828763040299 | -1.070867679505 | -0.313257019355 |
| O  | -2.871099706861 | 2.963694817213  | -1.565844317399 |
| O  | 2.158411598400  | 1.030202263355  | 0.575008518757  |
| O  | 2.829777849807  | 2.788572273906  | -1.800276341445 |
| O  | 0.124963578533  | 3.001869075639  | -1.228019560948 |
| O  | -3.774070166595 | 1.846896356300  | 0.158327206027  |
| O  | -2.950177579121 | 3.053016322782  | -0.105411052011 |
| Ge | 1.709748972688  | 3.203164793814  | -0.262662246640 |
| Ge | 4.923010431084  | -1.905534934664 | -2.199236202879 |
| Ge | 0.023417814353  | -1.976946504349 | -2.436983143066 |

|    |                 |                 |                 |
|----|-----------------|-----------------|-----------------|
| Ge | 4.327622359406  | 1.820030245134  | -1.740339724997 |
| Ge | 2.292003722316  | -0.412096428685 | -0.562496958097 |
| Ge | -0.880948663351 | 1.644642922176  | -1.951715334187 |
| TV | 8.813931586871  | 0.000000000000  | 0.000000000000  |
| TV | -1.708412576142 | 8.154827654814  | 0.000000000000  |
| TV | -2.645355209589 | -0.785838906322 | 4.167025688173  |

# EQ-GeO<sub>2</sub> 134

|    |                 |                 |                 |
|----|-----------------|-----------------|-----------------|
| O  | -1.439490973673 | -2.036362513591 | -1.148329357290 |
| O  | 2.999179040968  | -1.623179545360 | -0.923634058182 |
| O  | 3.621338565756  | 1.025731493723  | -2.303836039605 |
| O  | 0.687379480843  | -0.153818598469 | -1.766173428605 |
| O  | -3.304656214049 | -1.202178184314 | 0.029245284570  |
| O  | -1.952177165264 | -0.839158263071 | -0.398946268930 |
| O  | -3.181306363448 | 2.980851654446  | -1.630873055263 |
| O  | 2.676563487631  | 1.356224682100  | 0.086559376826  |
| O  | 3.085294517830  | 3.833343253817  | -0.708797523474 |
| O  | 0.509650879133  | 2.688308122489  | -1.438721866786 |
| O  | -3.514881845901 | 1.871392668538  | 0.325815310611  |
| O  | -2.551727868005 | 2.856452210907  | -0.294495869528 |
| Ge | 1.341822472614  | 3.082601244181  | 0.179193185062  |
| Ge | 4.780449395130  | -2.114866261684 | -1.666373214599 |
| Ge | 0.167698807719  | -2.058871198377 | -2.296971902638 |
| Ge | 4.055066090565  | 2.282132604436  | -0.989955977278 |
| Ge | 2.426234401329  | 0.048598314433  | -1.242203377828 |
| Ge | -0.786592865383 | 1.425261943256  | -1.890539061988 |
| TV | 8.941275241751  | -0.000000000000 | -0.000000000000 |
| TV | -1.437040921244 | 7.747733503445  | -0.000000000000 |
| TV | -3.044870002027 | -0.020868994711 | 4.384094651421  |

# EQ-GeO<sub>2</sub> 135

|    |                 |                 |                 |
|----|-----------------|-----------------|-----------------|
| O  | -0.956033948198 | -2.487878410903 | -1.181689081436 |
| O  | 2.494534620440  | -1.492867871617 | -0.602553374812 |
| O  | 3.510502310272  | 0.970201886974  | -2.011435598576 |
| O  | 0.455927924129  | 0.053392731727  | -1.812216788374 |
| O  | -2.784372177530 | -2.318135860548 | 0.319827894459  |
| O  | -1.708197869678 | -1.540135970906 | -0.283886211488 |
| O  | -2.413302525466 | 2.834635981315  | -1.469068669449 |
| O  | 2.277980341326  | 1.645558673865  | 0.176095301630  |
| O  | 2.977864618822  | 4.015421851742  | -0.896092208559 |
| O  | 0.582022461722  | 2.881584818042  | -1.868402931109 |
| O  | -3.071924835988 | 2.345827891558  | 0.667000801350  |
| O  | -1.923995673690 | 2.926727187943  | -0.076762839670 |
| Ge | 1.047142966261  | 3.487933940898  | -0.169987148827 |
| Ge | 4.041776098432  | -2.408245855687 | -1.395169899403 |
| Ge | 0.260981138306  | -1.833185631909 | -2.560289934747 |
| Ge | 3.808375575837  | 2.375157741167  | -0.855946643584 |
| Ge | 2.100922232493  | 0.211075560751  | -1.040335157559 |
| Ge | -0.683572700151 | 1.795332908161  | -2.679758114129 |
| TV | 8.062857128120  | -0.000000000000 | 0.000000000000  |
| TV | -0.122819993465 | 8.187898077292  | 0.000000000000  |
| TV | -1.907089609364 | -1.443144246741 | 4.629713502697  |

# EQ-GeO<sub>2</sub> 136

|   |                 |                 |                 |
|---|-----------------|-----------------|-----------------|
| O | -0.940418991169 | -2.525783860525 | -1.120567093067 |
| O | 2.401223603780  | -1.469842881081 | -0.608054232573 |
| O | 3.427144110668  | 0.986695062203  | -2.005677348884 |

|    |                 |                 |                 |
|----|-----------------|-----------------|-----------------|
| O  | 0.352973038646  | 0.080064609815  | -1.739278103086 |
| O  | -2.803668965110 | -2.398873444133 | 0.351909078085  |
| O  | -1.695761751455 | -1.617842196089 | -0.185463143541 |
| O  | -2.340033397810 | 2.729571767417  | -1.432805046517 |
| O  | 2.236635838368  | 1.663862325781  | 0.209476787847  |
| O  | 2.978959998375  | 4.028451797123  | -0.911392376185 |
| O  | 0.614692251297  | 2.884713109720  | -1.894171136276 |
| O  | -3.051078351883 | 2.337500720702  | 0.704813305358  |
| O  | -1.846003566993 | 2.778800524887  | -0.038691256462 |
| Ge | 1.013911664818  | 3.547498639389  | -0.201592546235 |
| Ge | 3.952609595827  | -2.394287538287 | -1.380602811919 |
| Ge | 0.213186522352  | -1.799743345804 | -2.527707539192 |
| Ge | 3.765419157771  | 2.369659057438  | -0.833021147147 |
| Ge | 2.021736881695  | 0.247536614605  | -1.013839330099 |
| Ge | -0.662547002677 | 1.819334445468  | -2.727439895384 |
| TV | 7.980551045726  | 0.000000000000  | 0.000000000000  |
| TV | 0.004501481227  | 8.161973973699  | -0.000000000000 |
| TV | -1.887593654513 | -1.540759242586 | 4.657699953998  |

# EQ-GeO<sub>2</sub> 137

|    |                 |                 |                 |
|----|-----------------|-----------------|-----------------|
| O  | -6.023484424841 | 2.129619645871  | -3.173979786012 |
| O  | 1.425143080305  | -2.414543163503 | 2.650086263295  |
| O  | 3.989156293507  | 1.485379730280  | 0.127333247066  |
| O  | 1.831857481427  | 1.945096793797  | -5.022950036174 |
| O  | -4.030443091454 | -8.351711993771 | -4.245771803160 |
| O  | 4.121377055684  | -2.532838021875 | 1.417325340454  |
| O  | -2.749427916579 | 7.799176530582  | -3.180233915875 |
| O  | 4.737495217760  | 3.262471004022  | 2.648349972439  |
| O  | 7.285661781242  | 7.164385601286  | 0.126000522772  |
| O  | 5.119568042359  | 7.619885097507  | -5.025857159356 |
| O  | -0.752070004009 | -2.671129339737 | -4.247230419896 |
| O  | 7.429623268747  | 3.152307141049  | 1.422272199615  |
| Ge | 6.829089685230  | 5.285777804415  | -0.156846773107 |
| Ge | 0.480474026520  | -2.721190615286 | 1.138269799779  |
| Ge | -0.188606149370 | -3.134084853237 | -2.225981334049 |
| Ge | 3.787297901401  | 2.956767943722  | 1.139417294549  |
| Ge | 3.515689440127  | -0.390695751098 | -0.159921434924 |
| Ge | 3.122576022859  | 2.544896886871  | -2.223885441816 |
| TV | 5.494857344738  | -0.000000000284 | 0.000000000071  |
| TV | 6.591638658113  | 11.355092042944 | -0.000000000292 |
| TV | 2.372664795237  | 2.469738533597  | 5.019371517572  |

# EQ-GeO<sub>2</sub> 138

|    |                 |                 |                 |
|----|-----------------|-----------------|-----------------|
| O  | -3.282278315988 | -1.198036651300 | -1.190545771341 |
| O  | 3.284144636855  | -1.816523708147 | 0.056293055331  |
| O  | 4.706984858039  | -0.301979727623 | -1.568572944888 |
| O  | 1.768294855222  | 0.473899471182  | -1.296708424248 |
| O  | -2.925921972581 | -1.254373856352 | -2.536195042833 |
| O  | -2.204803018322 | -1.906205451748 | -0.375327694143 |
| O  | -2.262157690441 | 2.230107694508  | -1.146995985080 |
| O  | 4.311939497887  | 1.755914129078  | 0.109039429215  |
| O  | 5.682184205922  | 3.184776558686  | -1.620636159206 |
| O  | 2.746702687383  | 4.011407174775  | -1.175047421807 |
| O  | -1.737007660911 | 2.132018716866  | -2.449118426384 |
| O  | -1.364357265604 | 1.450288023573  | -0.208389261706 |
| Ge | 4.256653427056  | 3.721214411213  | -0.228306440208 |
| Ge | 5.219908500122  | -2.251287759576 | -0.636988068111 |

|    |                 |                 |                 |
|----|-----------------|-----------------|-----------------|
| Ge | -0.236798618496 | -1.515316240018 | -1.869252391029 |
| Ge | 6.215794146023  | 1.313143485699  | -0.708643615169 |
| Ge | 3.188245182298  | 0.163039849440  | -0.240678124742 |
| Ge | 0.852751175974  | 2.091549856607  | -1.870715509515 |
| TV | 10.862651646217 | 0.000000000007  | 0.000000000001  |
| TV | 2.135855493576  | 7.143883528343  | 0.000000000014  |
| TV | -3.040899578222 | -2.973650514800 | 3.283189004653  |

# EQ-GeO<sub>2</sub> 139

|    |                 |                 |                 |
|----|-----------------|-----------------|-----------------|
| O  | -2.983519321258 | -1.570347157506 | -1.107246292100 |
| O  | 3.179728806959  | -1.802076430187 | 0.010826181268  |
| O  | 4.642669571659  | -0.307285144338 | -1.626492047802 |
| O  | 1.647478934135  | 0.567352521189  | -0.942197143969 |
| O  | -2.305059549206 | -2.008803674487 | -2.272936426296 |
| O  | -2.413536901036 | -2.287361394505 | 0.031547818242  |
| O  | -2.018828434481 | 2.438692573819  | -1.264106133367 |
| O  | 4.401835565864  | 1.794439062609  | 0.070380598213  |
| O  | 5.807008886251  | 3.301258581480  | -1.547942131302 |
| O  | 2.812118602262  | 4.044011535623  | -1.208536775110 |
| O  | -1.880251279488 | 2.408495674033  | -2.658763155559 |
| O  | -0.861888068976 | 1.653371682760  | -0.597053143858 |
| Ge | 4.334358915661  | 3.779589961991  | -0.287135232647 |
| Ge | 5.090028766520  | -2.247443164625 | -0.772752349947 |
| Ge | -0.210207363731 | -1.535168217930 | -2.049105567242 |
| Ge | 6.245000740979  | 1.174151252403  | -0.763984758103 |
| Ge | 3.204355246154  | 0.188544061135  | -0.149829340155 |
| Ge | 0.917730180001  | 2.125526425956  | -1.821462896156 |
| TV | 10.734667133357 | 0.000000000007  | 0.000000000001  |
| TV | 2.285052309060  | 7.217852996118  | 0.000000000014  |
| TV | -2.953823633227 | -3.038596574769 | 3.330249400885  |

# EQ-GeO<sub>2</sub> 140

|    |                 |                  |                 |
|----|-----------------|------------------|-----------------|
| O  | -1.247034619652 | 4.365777771508   | 8.105232523583  |
| O  | 10.372834132513 | -12.513882481198 | -6.342419317129 |
| O  | -4.751498453339 | 2.632249396752   | 2.436258774049  |
| O  | 1.879364047157  | 6.314477806039   | 0.372821598592  |
| O  | 1.900539036008  | 4.409940294355   | 8.269189529780  |
| O  | 13.505720007974 | -12.514474915015 | -6.343110500803 |
| O  | -1.515095807243 | 2.796046479359   | 2.447284571940  |
| O  | 5.010851957759  | 6.317539147108   | 0.372445128688  |
| O  | 5.037760370720  | 4.339343882770   | 7.990966598563  |
| O  | 16.638416974465 | -12.516445280346 | -6.341700084478 |
| O  | 1.581472399365  | 2.988182098422   | 2.576584957852  |
| O  | 8.142915154365  | 6.317663068104   | 0.372116568554  |
| Ge | 11.286854156118 | 5.331455336213   | -7.137588394730 |
| Ge | 3.447815794682  | 5.031772833329   | 0.149963716028  |
| Ge | 6.578723582235  | 5.032184492765   | 0.149561117903  |
| Ge | 5.020143700266  | 5.332300439561   | -7.137034686863 |
| Ge | 8.153307225310  | 5.333573970239   | -7.137894477350 |
| Ge | 0.311348754505  | 5.033604672944   | 0.149511141964  |
| TV | 9.398916435501  | -0.000000000012  | 0.000000000002  |
| TV | -3.785893364015 | 16.814687133594  | 0.000000000003  |
| TV | -0.003073809939 | 1.126169487466   | 4.528481870686  |

# EQ-GeO<sub>2</sub> 141

|   |                 |                 |                 |
|---|-----------------|-----------------|-----------------|
| O | -2.003989118316 | -0.968516548563 | -1.715395088855 |
| O | 2.237103241102  | -1.687266658947 | 0.792424269474  |

|    |                 |                 |                 |
|----|-----------------|-----------------|-----------------|
| O  | 3.454938902045  | 0.258311296041  | -1.102267726664 |
| O  | 2.161000988794  | -1.680113526815 | -2.145919668708 |
| O  | -2.463029289917 | -0.940539943444 | 0.667525199369  |
| O  | -1.442837222458 | -0.742154356952 | -0.324802799857 |
| O  | -2.750119040104 | 2.391624870274  | -1.715380475917 |
| O  | 1.490988270203  | 1.673086228680  | 0.792373308905  |
| O  | 2.708797460476  | 3.618577194942  | -1.102196700511 |
| O  | 1.414893253502  | 1.680052375744  | -2.145993596423 |
| O  | -3.209117225152 | 2.419803907515  | 0.667582580278  |
| O  | -2.188949357740 | 2.618046161867  | -0.324799894938 |
| Ge | 0.755915385146  | 2.983818973730  | -0.565786911459 |
| Ge | 4.052056848565  | -1.387391240694 | -2.032382718964 |
| Ge | 0.201463262814  | -2.328898248916 | -2.612911404336 |
| Ge | 3.305931682664  | 1.972899901612  | -2.032417420373 |
| Ge | 1.502082720176  | -0.376412058312 | -0.565669287002 |
| Ge | -0.544699424641 | 1.031395347195  | -2.613019508958 |
| TV | 7.950894927323  | -0.000000000000 | 0.000000000000  |
| TV | -1.492277077815 | 6.720575249509  | 0.000000000000  |
| TV | -2.349881145414 | -0.306585829023 | 4.581636530381  |

# EQ-GeO<sub>2</sub> 142

|    |                 |                 |                 |
|----|-----------------|-----------------|-----------------|
| O  | -2.895374887605 | -0.916710484723 | -1.454957156937 |
| O  | 1.211684815103  | -0.197209295032 | 3.423799968365  |
| O  | 3.628365936788  | -0.465147354353 | -0.339099451638 |
| O  | 1.710687232061  | 1.375265435904  | -1.614091255547 |
| O  | -0.737289199088 | -2.917488599629 | -3.565890953604 |
| O  | -1.495574133231 | -1.229133997767 | -1.113524000415 |
| O  | -2.387615021131 | 2.137173941908  | -1.454931188094 |
| O  | 1.719522188011  | 2.856748512798  | 3.423759321753  |
| O  | 4.136211138179  | 2.588849354996  | -0.339054253543 |
| O  | 2.218423092642  | 4.429164867807  | -1.613993506219 |
| O  | -0.229475062491 | 0.136379959308  | -3.565827193223 |
| O  | -0.987779162565 | 1.824763299437  | -1.113570589199 |
| Ge | 2.249455549739  | 2.863934917847  | -0.201952769030 |
| Ge | 5.087736332922  | -2.200291967477 | -2.419275198988 |
| Ge | -0.352014062664 | -1.411532745727 | -2.570277847622 |
| Ge | 5.595658409706  | 0.853633448854  | -2.419316014147 |
| Ge | 1.741658494013  | -0.189968260521 | -0.202022554239 |
| Ge | 0.155781464247  | 1.642443760598  | -2.570322142795 |
| TV | 9.355692335588  | 0.000000000000  | -0.000000000001 |
| TV | 1.015601293051  | 6.107884675839  | 0.000000000014  |
| TV | -3.379052831065 | -2.778113424822 | 5.180964887079  |

# EQ-GeO<sub>2</sub> 143

|    |                 |                |                 |
|----|-----------------|----------------|-----------------|
| O  | 2.445447281399  | 0.283640637003 | -2.207053271845 |
| O  | -0.592942664597 | 2.648690922718 | -0.617982361583 |
| O  | 1.501193565761  | 0.917797704164 | -3.096108194540 |
| O  | -0.745379773882 | 2.624240117174 | -3.363155493938 |
| O  | -2.363709215715 | 3.837727500998 | 1.018166210372  |
| O  | -0.309314190631 | 1.933812482601 | 0.617536872412  |
| O  | 6.830778649217  | 0.281209403118 | -2.209333883829 |
| O  | 3.792486952564  | 2.648895459075 | -0.620245972517 |
| O  | 5.886699211092  | 0.915160585045 | -3.098207672201 |
| O  | 3.641787152220  | 2.621703743012 | -3.367518257744 |
| O  | 2.021414064479  | 3.835628711445 | 1.012273432260  |
| O  | 4.075023630777  | 1.933560864978 | 0.615255176873  |
| Ge | 4.153867844303  | 1.312924167767 | -2.179672347808 |

|    |                 |                 |                 |
|----|-----------------|-----------------|-----------------|
| Ge | 2.682241577145  | 0.686999673119  | 1.448820679756  |
| Ge | 0.709427040484  | 0.036052434145  | -0.107409191914 |
| Ge | 7.065730751608  | 0.689201506379  | 1.451900745666  |
| Ge | -0.231268672520 | 1.313120667495  | -2.178338315276 |
| Ge | 5.096156463852  | 0.036318975988  | -0.109373675987 |
| TV | 8.769255202764  | -0.000000000000 | -0.000000000000 |
| TV | -1.807643532243 | 4.566283993032  | -0.000000000000 |
| TV | -0.331844488841 | -1.397441134857 | 6.459362319480  |

# EQ-GeO<sub>2</sub> 144

|    |                 |                 |                 |
|----|-----------------|-----------------|-----------------|
| O  | -0.457587813257 | 5.060634941208  | -1.769330302331 |
| O  | -0.522471298255 | -0.537507090090 | -0.305669181773 |
| O  | -1.539050857381 | 2.804801651486  | 0.458206255981  |
| O  | -1.904620197314 | 2.100818836102  | 1.410939838506  |
| O  | 2.551969952720  | 5.060835868298  | -1.769391989952 |
| O  | 2.487029922924  | -0.537318367702 | -0.305994267408 |
| O  | 1.470857221570  | 2.804897999247  | 0.458105683494  |
| O  | 1.105533076058  | 2.100767058938  | 1.410833103080  |
| O  | 5.561330467275  | 5.060547009932  | -1.769156853666 |
| O  | 5.497117450414  | -0.537650934983 | -0.306049077789 |
| O  | 4.480416447682  | 2.804866769847  | 0.458226654766  |
| O  | 4.114863978424  | 2.100680271176  | 1.410820165048  |
| Ge | 6.989084479260  | -3.473374687899 | -0.900285314829 |
| Ge | 3.991987512895  | -1.079350682226 | 0.720485301074  |
| Ge | 7.001744545844  | -1.079918617443 | 0.720852195119  |
| Ge | 0.969804857372  | -3.473176955804 | -0.900089890240 |
| Ge | 3.979363954708  | -3.472948037679 | -0.900185550277 |
| Ge | 0.982337221022  | -1.079793196799 | 0.720825744040  |
| TV | 9.029044201647  | 0.000000000001  | -0.000000000000 |
| TV | 0.077153254320  | 9.304623312461  | 0.000000000003  |
| TV | 0.013466679818  | 0.442755224780  | 3.751882354157  |

# EQ-GeO<sub>2</sub> 145

|    |                 |                 |                 |
|----|-----------------|-----------------|-----------------|
| O  | 2.274307272873  | 1.180450094507  | -1.012986095600 |
| O  | -0.619305489465 | -0.366016059354 | 0.971377624756  |
| O  | -1.494565557069 | -1.213199075860 | 1.262802124311  |
| O  | -0.408874577340 | 2.751857787646  | 0.115555873048  |
| O  | 2.014404914846  | 2.627807736339  | -1.406933654347 |
| O  | -0.181980596238 | 1.165338801601  | -2.371099515065 |
| O  | 7.292120625881  | 1.199937554618  | -0.855086900075 |
| O  | 4.576712452828  | -0.333725820791 | 0.907131564473  |
| O  | 3.726361585609  | -1.223187947309 | 1.145213001003  |
| O  | 4.611215804191  | 2.859368356655  | -0.010743027715 |
| O  | 7.149852211798  | 2.637565365605  | -1.329458006995 |
| O  | 4.989574750942  | 1.251630516908  | -2.447148122251 |
| Ge | 2.912464671208  | 2.579510351065  | 0.625317797902  |
| Ge | 0.020032310389  | 3.014384563256  | -1.731814108262 |
| Ge | 0.950347213048  | -0.087310063062 | -1.698068582601 |
| Ge | 5.203452445057  | 3.089273871951  | -1.815106359850 |
| Ge | -2.123866609670 | 2.602415625983  | 0.762601536313  |
| Ge | 5.996337443781  | -0.034685131259 | -1.654110514055 |
| TV | 10.063612009650 | -0.000000000001 | 0.000000000000  |
| TV | -0.164914238594 | 7.066235427052  | -0.000000000001 |
| TV | -0.786676177187 | 0.985809423129  | 5.505944035016  |

# EQ-GeO<sub>2</sub> 146

|   |                 |                 |                 |
|---|-----------------|-----------------|-----------------|
| O | -0.989226017011 | -0.619612203402 | -0.635707698894 |
|---|-----------------|-----------------|-----------------|



|    |                 |                 |                 |
|----|-----------------|-----------------|-----------------|
| O  | -0.926090229854 | 1.433970123079  | -0.606855780081 |
| O  | 1.164464528190  | 2.467097071270  | -1.946801505050 |
| O  | 2.512661427493  | 2.386914395993  | -2.312900161503 |
| O  | -1.311759378034 | -1.864562261737 | 1.740018685921  |
| O  | -1.233444103267 | -0.804097514723 | 2.801133050053  |
| O  | 1.280513876598  | 0.373261524477  | 0.963851285356  |
| O  | 2.714782767670  | 0.307688026152  | 1.097052154461  |
| O  | -1.211423357155 | -3.883780975924 | 5.843523144562  |
| O  | -1.120474957498 | -1.812163575874 | 5.839116738119  |
| O  | 1.087580652136  | -0.387545182329 | 4.692212690606  |
| O  | 2.496634753917  | -0.808285453863 | 4.379763342355  |
| Ge | -2.758773935496 | -0.670263540999 | 6.279641767298  |
| Ge | 0.450125111314  | -1.764317603379 | 0.301523399106  |
| Ge | -0.039148921547 | -2.015290040977 | 4.155986583502  |
| Ge | -2.481809576016 | 2.606164047026  | -0.043792079445 |
| Ge | -2.619741679371 | 0.663725902158  | 3.008800786542  |
| Ge | 0.081043102601  | 0.480219771906  | -2.374738694300 |
| TV | 6.085303080385  | 0.000000000007  | -0.000000000003 |
| TV | 0.095525212265  | 4.300737809084  | 0.000000000008  |
| TV | 0.104459837307  | -5.148951337986 | 9.412993712822  |

# EQ-GeO<sub>2</sub> 147

|    |                 |                 |                 |
|----|-----------------|-----------------|-----------------|
| O  | 0.230308248939  | 6.406373638016  | 3.734779474230  |
| O  | 3.817838619751  | -3.963250945755 | -6.709931973948 |
| O  | -1.473611477022 | 4.012566469591  | 3.923134290127  |
| O  | 2.018136425321  | 2.473008615596  | -0.097593123008 |
| O  | 3.589138619040  | 6.412463168957  | 3.735354702084  |
| O  | 7.168985570919  | -3.960481647635 | -6.709307123873 |
| O  | 1.914073024186  | 4.005328380806  | 3.905323705659  |
| O  | 5.388372700641  | 2.473827395160  | -0.094307630251 |
| O  | 6.965542280377  | 6.410176610750  | 3.739302033793  |
| O  | 10.533509423619 | -3.961671986176 | -6.712249257542 |
| O  | 5.273335235414  | 4.010984458346  | 3.907182893813  |
| O  | 8.754454986683  | 2.481013417367  | -0.094050839968 |
| Ge | 12.213928326468 | -6.351817694722 | -6.155237889355 |
| Ge | 5.279553939744  | 5.479292572409  | 2.790694172879  |
| Ge | 8.663615389126  | 5.475823299122  | 2.800969292680  |
| Ge | 5.465900082317  | -6.344585237625 | -6.171206006901 |
| Ge | 8.836976684955  | -6.342554397480 | -6.169315718897 |
| Ge | 1.914852616888  | 5.474867047515  | 2.789680025573  |
| TV | 10.128854116623 | 0.000000000001  | 0.000000000000  |
| TV | 0.017048078130  | 5.078511969183  | -0.000000000001 |
| TV | -1.788881120586 | 5.103576860327  | 5.958552043599  |

#### (iv) CO<sub>2</sub> at 10<sup>6</sup> atm

##### # EQ'-CO<sub>2</sub> 0

|    |                 |                 |                |
|----|-----------------|-----------------|----------------|
| C  | -0.061105537805 | 0.425836979961  | 0.187382860209 |
| C  | -0.775453729146 | -1.109586782780 | 1.726500117641 |
| C  | -2.201601704674 | -2.838116926731 | 1.236747738056 |
| C  | -2.919303994948 | -4.375416846371 | 2.769166955118 |
| C  | -4.353751618379 | -6.100243137487 | 2.279306996746 |
| C  | -5.062520087775 | -7.634320413761 | 3.816441331379 |
| O  | -2.534744137186 | 0.841801919992  | 0.936625520054 |
| O  | -4.691774025264 | -2.426489892106 | 1.981041624465 |
| O  | -0.450869238051 | 0.195398675687  | 1.450174685897 |
| O  | -2.564052715490 | -3.068877721139 | 2.506589593291 |
| O  | -3.984413396599 | -4.795072758669 | 2.050830839510 |
| O  | -1.859753099536 | -5.164236833156 | 2.524490821391 |
| O  | -1.836273138939 | -1.533878667189 | 1.011233285219 |
| O  | -6.803189273039 | -5.657564451335 | 3.028689776039 |
| O  | 0.284659555117  | -1.895562501861 | 1.485599830353 |
| O  | -4.726952582302 | -6.327126923928 | 3.548419488575 |
| O  | -6.117948890674 | -8.046837169301 | 3.090662832995 |
| O  | -3.996680903920 | -8.417065697133 | 3.579312798545 |
| TV | 7.059965140184  | 0.000000000002  | 0.000000000001 |
| TV | -1.366535795140 | 4.484387591299  | 0.000000000003 |
| TV | -6.430182266363 | -9.780744303834 | 3.127432006394 |

##### # EQ'-CO<sub>2</sub> 1

|    |                 |                 |                 |
|----|-----------------|-----------------|-----------------|
| C  | -0.735621277394 | -1.105859754871 | 0.212120702737  |
| C  | 0.492600857796  | -0.521324373757 | 1.982188071046  |
| C  | -3.276098298222 | -3.726229383693 | 1.622790723524  |
| C  | -2.038268984964 | -3.134589106569 | 3.385102828837  |
| C  | -5.817452688505 | -6.329023256752 | 3.029808379169  |
| C  | -4.577857313789 | -5.753985744005 | 4.793658569558  |
| O  | -0.378170263999 | 1.495378684751  | 0.337859450497  |
| O  | -2.930400821930 | -1.131288110974 | 1.747553641152  |
| O  | -0.729268988761 | -0.513145867339 | 1.416195909803  |
| O  | -3.264896725377 | -3.139031099714 | 2.829008143526  |
| O  | -4.536134170238 | -3.742930103799 | 1.156309060430  |
| O  | -1.634697443104 | -4.401105902020 | 3.587421852026  |
| O  | -1.996551013335 | -1.135621116121 | -0.257031816636 |
| O  | -5.475958929470 | -3.732168469816 | 3.158416504715  |
| O  | 0.892091926042  | -1.789897275251 | 2.183878693686  |
| O  | -5.805172950533 | -5.740366856945 | 4.237068984756  |
| O  | -7.074388661338 | -6.349434810502 | 2.554907194397  |
| O  | -4.180312865826 | -7.022402960131 | 4.994924931040  |
| TV | 6.015224624587  | 0.000000000003  | 0.000000000001  |
| TV | -0.116541357820 | 3.855933766816  | 0.000000000002  |
| TV | -7.610124872851 | -7.837638416948 | 4.222796890052  |

##### # EQ'-CO<sub>2</sub> 2

|   |                 |                 |                |
|---|-----------------|-----------------|----------------|
| C | 0.671188990165  | -2.154148914266 | 0.669190451547 |
| C | -0.659981636616 | -0.720435054259 | 1.740019597068 |
| C | -0.939037502583 | -4.679399098479 | 2.097567471910 |
| C | -2.270211281364 | -3.245701726207 | 3.168427507547 |
| C | -2.549271970086 | -7.204620903506 | 3.525962444966 |
| C | -3.880422381584 | -5.770915123869 | 4.596819660753 |
| O | -2.193340336628 | 0.514750420329  | 0.100247349897 |

|    |                 |                 |                 |
|----|-----------------|-----------------|-----------------|
| O  | -3.803553529605 | -2.010495320589 | 1.528628039575  |
| O  | -0.911541075858 | 0.594139855326  | 1.855792533104  |
| O  | -2.521732400807 | -1.931125174622 | 3.284181845974  |
| O  | -3.329531935322 | -3.926547517547 | 2.695177042584  |
| O  | -1.242145766834 | -3.389262176295 | 2.310089840727  |
| O  | -1.719306622089 | -1.401286135841 | 1.266784778175  |
| O  | -5.413793218837 | -4.535723414105 | 2.957006824746  |
| O  | 0.368077906523  | -0.864007981822 | 0.881694084699  |
| O  | -4.131960753207 | -4.456332915553 | 4.712594220855  |
| O  | -4.939752367320 | -6.451741009303 | 4.123549799757  |
| O  | -2.852381084154 | -5.914474962785 | 3.738459941506  |
| TV | 6.891533121007  | 0.000000000001  | -0.000000000000 |
| TV | -1.839724889181 | 3.327196678905  | -0.000000000000 |
| TV | -4.830663406280 | -7.575720847435 | 4.285164093581  |

# EQ'-CO<sub>2</sub> 3

|    |                 |                 |                 |
|----|-----------------|-----------------|-----------------|
| C  | 0.047449292778  | -1.663324938306 | 1.254425647602  |
| C  | -1.862198876168 | -0.753041081370 | 0.537631371263  |
| C  | -1.354347412223 | -2.344849107170 | 4.131725853330  |
| C  | -3.263998890855 | -1.434560331397 | 3.414933708323  |
| C  | -2.756144039086 | -3.026368279321 | 7.009020059521  |
| C  | -4.665788027008 | -2.116084911750 | 6.292231701368  |
| O  | -1.290803227298 | 0.426298327616  | 0.233634222294  |
| O  | -2.692606639132 | -0.255220580624 | 3.110934862874  |
| O  | -0.783154444705 | 0.733986933873  | 2.332149134033  |
| O  | -2.184949651302 | 0.052461709616  | 5.209445183145  |
| O  | -2.630649649352 | -2.043671187552 | 4.434454808945  |
| O  | -0.722498504506 | -1.212552543334 | 3.775278787002  |
| O  | -1.228852736118 | -1.362137038414 | 1.557161899757  |
| O  | -4.094391260696 | -0.936745509338 | 5.988238345992  |
| O  | 0.679297477556  | -0.531027999469 | 0.897972865439  |
| O  | -3.586747042473 | -0.629061182729 | 8.086742747292  |
| O  | -4.032451754397 | -2.725190588923 | 7.311759491419  |
| O  | -2.124291963741 | -1.894073122663 | 6.652574853335  |
| TV | 3.818139631749  | 0.000000000000  | -0.000000000000 |
| TV | -1.405274958536 | 2.961197648831  | 0.000000000000  |
| TV | -4.205383775070 | -2.044561864928 | 8.631892990193  |

# EQ'-CO<sub>2</sub> 4

|   |                 |                 |                 |
|---|-----------------|-----------------|-----------------|
| C | -2.063673962209 | 0.418417369225  | 0.172139968039  |
| C | 0.800944002890  | 3.465050447340  | -1.316214448585 |
| C | -0.631409905600 | 1.941605981712  | -0.572292455026 |
| C | -2.062956022057 | -1.915919455016 | 2.404099275228  |
| C | 0.801658834899  | 1.130710083332  | 0.915741074392  |
| C | -0.630695100002 | -0.392738236346 | 1.659644669690  |
| O | 0.693171985069  | 5.776655185864  | 0.033391882501  |
| O | 0.360293073624  | -0.150907704856 | 0.780298511756  |
| O | -1.623188302592 | 0.495227838874  | 1.459174484863  |
| O | -2.507544051763 | -0.826746625970 | -0.062034094714 |
| O | -2.506825903188 | -3.161085846525 | 2.169921161661  |
| O | -0.164128651250 | 2.063853991585  | 0.685268531116  |
| O | -1.098406854633 | 0.690050801282  | -0.750022494293 |
| O | -0.163417758308 | -0.270502549654 | 2.917207685734  |
| O | -1.097701356930 | -1.644293755899 | 1.481933438200  |
| O | 0.693885839842  | 3.442317359458  | 2.265337382399  |
| O | 0.361003127560  | -2.485262636544 | 3.012247267359  |
| O | -1.622461555464 | -1.839111928228 | 3.691131781733  |

|    |                 |                 |                 |
|----|-----------------|-----------------|-----------------|
| TV | 4.856252696229  | 0.000000000000  | -0.000000000000 |
| TV | -1.103680513957 | 4.469242481608  | 0.000000000000  |
| TV | 0.001424063965  | -4.668692786232 | 4.463889123592  |

# EQ'-CO<sub>2</sub> 5

|    |                 |                 |                 |
|----|-----------------|-----------------|-----------------|
| C  | 0.036410723006  | -1.736039179538 | 1.449869488243  |
| C  | -1.809129208830 | -0.559070382778 | 0.792515100165  |
| C  | 0.054729889007  | -0.673341500311 | 3.364197778348  |
| C  | -1.790811059490 | 0.503623624784  | 2.706845384952  |
| C  | 0.073091614436  | 0.389362620652  | 5.278516605379  |
| C  | -1.772454119049 | 1.566304175862  | 4.621163936982  |
| O  | -1.410385519128 | -0.494556477364 | -0.497810225333 |
| O  | -1.392026423183 | 0.568171689650  | 1.416527483573  |
| O  | 0.469211590640  | 2.764886249601  | 2.734912275494  |
| O  | 0.487576853481  | 3.827587444872  | 4.649238834078  |
| O  | -1.294028878108 | -0.591647568475 | 3.326357085105  |
| O  | 0.550507069736  | 0.422014862039  | 2.745679830173  |
| O  | -1.312349476380 | -1.654336482667 | 1.412021674552  |
| O  | -1.373692163723 | 1.630857564001  | 3.330842483710  |
| O  | 0.532205853155  | -0.640686799370 | 0.831356965062  |
| O  | 0.505958505328  | 4.890279103650  | 6.563553985604  |
| O  | -1.275667981947 | 0.471048705904  | 5.240681825779  |
| O  | 0.568862753465  | 1.484725030898  | 4.659999979196  |
| TV | 3.690130391324  | -0.000000000000 | -0.000000000000 |
| TV | 0.015014461493  | 4.568256760385  | -0.000000000000 |
| TV | 0.055093524826  | 3.188093773256  | 5.742981126551  |

# EQ'-CO<sub>2</sub> 6

|    |                 |                 |                 |
|----|-----------------|-----------------|-----------------|
| C  | 0.055714122007  | -2.050743522369 | 0.944609859705  |
| C  | -1.744190746406 | -0.655204436721 | 1.287990363142  |
| C  | 0.060854179719  | -2.562301772607 | 3.068491503155  |
| C  | -1.739084435923 | -1.167492817144 | 3.411164062190  |
| C  | 0.066378364096  | -3.075087035607 | 5.191846457715  |
| C  | -1.733234122975 | -1.679985959207 | 5.534862703915  |
| O  | -1.384220281298 | 0.296350395627  | 0.394282231175  |
| O  | -1.378289459222 | -0.215843300861 | 2.518570150250  |
| O  | 0.417520328233  | 1.263506791425  | 1.836547420259  |
| O  | 0.422682924270  | 0.752308732277  | 3.960332749917  |
| O  | -1.272617096515 | -2.392860985903 | 3.119568985883  |
| O  | 0.527961150539  | -1.337344440979 | 3.360413955696  |
| O  | -1.277915964247 | -1.879747881305 | 0.994380797950  |
| O  | -1.373429830153 | -0.728225829927 | 4.640893499487  |
| O  | 0.522685978537  | -0.826042517770 | 1.239048411584  |
| O  | 0.428287456527  | 0.238625561516  | 6.082809458433  |
| O  | -1.266924990138 | -2.905061420424 | 5.243293961829  |
| O  | 0.533537368323  | -1.850957942921 | 5.486132519604  |
| TV | 3.600474684375  | 0.000000000000  | -0.000000000000 |
| TV | -0.003529876307 | 4.266016922122  | -0.000000000000 |
| TV | 0.017196667299  | -1.536285239068 | 6.370594452450  |

# EQ'-CO<sub>2</sub> 7

|   |                 |                |                 |
|---|-----------------|----------------|-----------------|
| C | -2.134918359911 | 2.141098514014 | 1.099940796605  |
| C | 0.736356110533  | 2.155875146426 | -2.399881544983 |
| C | -0.698681111457 | 2.744212001251 | -0.649418595773 |
| C | -2.132714323109 | 0.317602890782 | 4.237336793275  |
| C | 0.738548057547  | 0.332379109222 | 0.737520827462  |
| C | -0.696486795163 | 0.920711299617 | 2.487977640537  |

|    |                 |                 |                 |
|----|-----------------|-----------------|-----------------|
| O  | 0.384400697539  | 3.529288194893  | -0.470962753092 |
| O  | -0.342196956168 | 0.089877395056  | 1.511627113355  |
| O  | -1.774181044037 | 1.714607580183  | 2.310471082687  |
| O  | -2.513772138585 | -2.016734275362 | -1.807129796234 |
| O  | -2.511588558907 | -3.840233593349 | 1.330275694143  |
| O  | 1.102577520910  | 1.590807147514  | 0.504139139622  |
| O  | -1.056308614170 | 1.907335353894  | 0.323389353244  |
| O  | 1.104772199645  | -0.232690907050 | 3.641534441075  |
| O  | -1.054106898152 | 0.083844422213  | 3.460792322860  |
| O  | 0.386594297050  | 1.705783329765  | 2.666431977768  |
| O  | -0.339995500997 | -1.733621412197 | 4.649027186611  |
| O  | -1.771979024650 | -0.108890700657 | 5.447867075200  |
| TV | 4.317640084767  | 0.000000000000  | -0.000000000000 |
| TV | 0.010109037286  | 3.620919234856  | 0.000000000000  |
| TV | 0.004390253845  | -3.646998334741 | 6.274793710807  |

# EQ'-CO<sub>2</sub> 8

|    |                 |                 |                 |
|----|-----------------|-----------------|-----------------|
| C  | -0.573860589086 | -0.927932150877 | 1.562741860662  |
| C  | -2.77326437235  | -0.927944325978 | 1.562731008615  |
| C  | -0.571714309487 | -0.917151347507 | 3.760442728949  |
| C  | -2.775186349197 | -0.917144832274 | 3.760432775593  |
| C  | -0.569572797087 | -0.906381355137 | 5.958132072121  |
| C  | -2.773035508940 | -0.906329720409 | 5.958142886135  |
| O  | -2.777814745905 | -0.130931310415 | 0.460346738605  |
| O  | -2.775670229325 | -0.120169210297 | 2.658049485500  |
| O  | -0.572194885472 | -0.120167083522 | 2.658041332209  |
| O  | -0.570064234022 | -0.109365920880 | 4.855748736885  |
| O  | -1.672751114697 | -1.717556166550 | 3.763535110378  |
| O  | 0.530709163629  | -1.717572226879 | 3.763515955877  |
| O  | -1.674902493140 | -1.728345083478 | 1.565822497091  |
| O  | -2.773542973943 | -0.109350670454 | 4.855740044189  |
| O  | 0.528559735424  | -1.728356597516 | 1.565799315936  |
| O  | -0.567898763409 | -0.098581459776 | 7.053451355395  |
| O  | -1.670596776298 | -1.706756658755 | 5.961233203229  |
| O  | 0.532866768885  | -1.706762926199 | 5.961214097543  |
| TV | 4.406930866707  | 0.000000000000  | 0.000000000000  |
| TV | -2.207270973206 | 3.284084609633  | -0.000000000001 |
| TV | 0.006450075737  | 0.032364093552  | 6.593109511806  |

# EQ'-CO<sub>2</sub> 9

|   |                 |                 |                |
|---|-----------------|-----------------|----------------|
| C | -0.146044081898 | -2.085732186484 | 0.927872690808 |
| C | -1.094896657175 | -0.474089112573 | 1.347445624089 |
| C | -0.148275828414 | -2.634313854872 | 3.041702455777 |
| C | -1.096486554095 | -1.022061412769 | 3.460628034415 |
| C | -0.149625846909 | -3.183862992461 | 5.154535786737 |
| C | -1.098293169916 | -1.571885449008 | 5.573593276233 |
| O | -1.465036493872 | 0.471121258515  | 0.464005280748 |
| O | -1.467297030831 | -0.078423587863 | 2.576343471813 |
| O | 0.440204187048  | 1.306882313099  | 1.812149841211 |
| O | 0.439447031946  | 0.758576288942  | 3.925920444372 |
| O | -1.483820367736 | -2.295839601474 | 3.132174406171 |
| O | 0.238026495355  | -1.360370646004 | 3.370466079442 |
| O | -1.481337975023 | -1.748412769780 | 1.016593164077 |
| O | -1.468624240436 | -0.626472415141 | 4.690332190540 |
| O | 0.239598777217  | -0.813077394088 | 1.258901604164 |
| O | 0.437570859710  | 0.208651422371  | 6.037716476322 |
| O | -1.485175472069 | -2.845554906823 | 5.243698494657 |

|    |                 |                 |                |
|----|-----------------|-----------------|----------------|
| O  | 0.236663188564  | -1.910537070864 | 5.484917320295 |
| TV | 3.572712008934  | -0.000000000000 | 0.000000000000 |
| TV | 0.214451907100  | 4.335981846733  | 0.000000000000 |
| TV | -0.006848649666 | -1.649078918218 | 6.339200703518 |

# EQ'-CO<sub>2</sub> 10

|    |                 |                 |                 |
|----|-----------------|-----------------|-----------------|
| C  | -1.840234374025 | 0.243854989561  | 0.747059859985  |
| C  | 0.672983300146  | 3.887926057245  | -1.129794949489 |
| C  | 0.075269548888  | 0.191784726552  | -0.407835382898 |
| C  | -3.186745712598 | -1.549742354647 | 3.086175709139  |
| C  | -0.673567961000 | 2.094286094328  | 1.209358169239  |
| C  | -1.271259685214 | -1.601857381567 | 1.931273898886  |
| O  | 1.467620059737  | 8.995290481199  | -0.328691293940 |
| O  | -0.704091209310 | -2.183961958268 | 0.874990567383  |
| O  | -1.828334700381 | 1.581607653752  | 0.796497398541  |
| O  | -3.108217463369 | -0.156141882110 | 0.735173880223  |
| O  | -4.454723195161 | -1.949765196820 | 3.074282849463  |
| O  | 0.119046095506  | 1.540952260236  | -0.483050961104 |
| O  | -1.188458915850 | -0.255712896525 | -0.333299696521 |
| O  | -1.227492897407 | -0.252688951106 | 1.856090784013  |
| O  | -2.535007861285 | -2.049313349051 | 2.005787063331  |
| O  | 0.121034427709  | 7.201636616152  | 2.010483069967  |
| O  | -2.050604172277 | -3.977521862317 | 3.214120680482  |
| O  | -3.174834986235 | -0.211992034426 | 3.135636454658  |
| TV | 3.835341765842  | 0.000000000000  | 0.000000000000  |
| TV | 0.090720532232  | 5.581497298846  | -0.000000000000 |
| TV | -2.693053162527 | -3.587226293933 | 4.678235470934  |

# EQ'-CO<sub>2</sub> 11

|    |                 |                 |                 |
|----|-----------------|-----------------|-----------------|
| C  | -3.438386406527 | 2.011604023270  | -0.153592586861 |
| C  | 0.402841238640  | 2.797891296430  | -1.655616255846 |
| C  | -0.691865075340 | 2.215140589113  | 0.238624635820  |
| C  | -4.474471586639 | 3.936653022355  | -0.153589070590 |
| C  | -0.633243969078 | 4.722937567624  | -1.655616803627 |
| C  | -1.727949503037 | 4.140187873190  | 0.238625548325  |
| O  | 0.432030651995  | 2.824374573000  | 0.683141978123  |
| O  | 0.488434061655  | 0.384188932007  | 2.579377530590  |
| O  | -5.348802410557 | 2.260307341186  | 2.412175182344  |
| O  | -2.266372819992 | -1.100905048537 | -3.110991123571 |
| O  | -3.302458749573 | 0.824142729015  | -3.110993273708 |
| O  | 3.918494620732  | 2.189536066731  | -1.259126245042 |
| O  | -0.749666201199 | 0.943027018070  | 0.703242544399  |
| O  | 2.882411874334  | 4.114582336136  | -1.259122702929 |
| O  | -1.785757753095 | 2.868074176089  | 0.703236646459  |
| O  | -0.604055076137 | 4.749421507821  | 0.683141710373  |
| O  | -0.547649782210 | 2.309234574308  | 2.579380421889  |
| O  | -6.384889635257 | 4.185354185089  | 2.412177521545  |
| TV | 7.025446631368  | 0.000000000000  | 0.000000000001  |
| TV | -2.072174860877 | 3.850095863426  | -0.000000000002 |
| TV | 1.181231588434  | -1.828925483842 | 3.684185363305  |

# EQ'-CO<sub>2</sub> 12

|   |                 |                 |                 |
|---|-----------------|-----------------|-----------------|
| C | -2.394252875146 | 1.529875356799  | 0.082235551434  |
| C | 1.261400361343  | 1.836846390044  | -0.385904744006 |
| C | -0.506409442814 | 2.121249664985  | -0.818120863145 |
| C | -3.308761920898 | -0.129318642286 | 2.605840030002  |
| C | 0.346879351670  | 0.177571987223  | 2.137675873829  |

|    |                 |                 |                 |
|----|-----------------|-----------------|-----------------|
| C  | -1.420924318354 | 0.462066149976  | 1.705471615266  |
| O  | 0.718315665282  | 4.393654280175  | -0.008248977593 |
| O  | -0.321177962047 | 0.091646984105  | 0.962396183334  |
| O  | -1.917304522919 | 1.636072961420  | 1.332418650544  |
| O  | -1.868343685745 | -1.022219754264 | -0.321463565282 |
| O  | -2.782849487572 | -2.681431006108 | 2.202154289278  |
| O  | 0.190486190354  | 2.228395204061  | 0.348857904414  |
| O  | -1.451441482438 | 1.168059060901  | -0.778913852637 |
| O  | -0.724016975410 | 0.569167531544  | 2.872449123578  |
| O  | -2.365961831589 | -0.491122479959 | 1.744674923272  |
| O  | -0.196161368253 | 2.734422972249  | 2.515326706037  |
| O  | -1.235678946507 | -1.567507335170 | 3.486008637112  |
| O  | -2.831824007749 | -0.023078259661 | 3.856025128736  |
| TV | 5.411027415231  | -0.000000000000 | 0.000000000000  |
| TV | -1.207219922167 | 3.678473123310  | -0.000000000000 |
| TV | -1.829002830783 | -3.318333458769 | 5.047188833754  |

# EQ'-CO<sub>2</sub> 13

|    |                 |                 |                 |
|----|-----------------|-----------------|-----------------|
| C  | -1.548798473325 | 1.092193940975  | 0.447829782167  |
| C  | -0.306842375271 | 3.476708730310  | -1.160882048207 |
| C  | 0.962863488984  | -0.542964801090 | -0.110452973051 |
| C  | -1.581615282655 | 0.465852137094  | 2.602241418265  |
| C  | -0.339663754458 | 2.850371062178  | 0.993536997032  |
| C  | 0.930029418113  | -1.169299553050 | 2.043957636225  |
| O  | -1.993733748314 | 8.525406896816  | -0.176245915198 |
| O  | 1.963684753051  | -1.573290298748 | 1.334044819977  |
| O  | -1.609273280566 | 2.386172579926  | 0.824839671503  |
| O  | -2.843732461688 | 0.687416274726  | 0.340018283014  |
| O  | -2.876550889676 | 0.061077750911  | 2.494424383900  |
| O  | -0.892716204710 | 0.969135301771  | -0.743149049947 |
| O  | -0.033100798081 | -1.130504429023 | 0.040692985737  |
| O  | -0.925540175692 | 0.342791770626  | 1.411263433786  |
| O  | -0.065942591267 | -1.756837210374 | 2.195113764539  |
| O  | -2.026564407469 | 7.899061913714  | 1.978153489574  |
| O  | 1.930868009163  | -2.199630533035 | 3.488448204533  |
| O  | -1.642097012611 | 1.759831966656  | 2.979240349438  |
| TV | 3.992273669622  | -0.000000000000 | -0.000000000000 |
| TV | -2.352393667067 | 5.738036478346  | 0.000000000001  |
| TV | -0.065638895652 | -1.252691624215 | 4.308805019319  |

# EQ'-CO<sub>2</sub> 14

|   |                 |                 |                 |
|---|-----------------|-----------------|-----------------|
| C | -1.873158588111 | 0.375554581767  | 0.563883497735  |
| C | 1.053444260076  | 3.230499379748  | -0.394310356223 |
| C | 0.007983922288  | -0.506664302813 | -0.512812637606 |
| C | -3.901111788510 | -1.534302842110 | 2.922985803572  |
| C | -0.974541131272 | 1.320651213025  | 1.964782626357  |
| C | -2.019964995843 | -2.416516896840 | 1.846309167450  |
| O | 4.465644839651  | 9.323115278158  | -0.471074055120 |
| O | -1.579456802325 | -1.865792592126 | 0.730527048960  |
| O | -1.543789009789 | 1.708051074860  | 0.764716521906  |
| O | -3.151781518449 | 0.017530475174  | 0.585399633554  |
| O | -5.179738717300 | -1.892308258916 | 2.944517757269  |
| O | 0.686732617730  | 1.941105434405  | -0.581846450610 |
| O | -1.288053884208 | -0.076835235442 | -0.529649334471 |
| O | -1.341239372940 | 0.031243879248  | 1.777244298753  |
| O | -3.316002667964 | -1.986707147965 | 1.829471477406  |
| O | 2.437669411263  | 7.413265007929  | 1.888039629279  |

|    |                 |                 |                |
|----|-----------------|-----------------|----------------|
| O  | -3.607487838909 | -3.775633385672 | 3.089583889322 |
| O  | -3.571747753667 | -0.201805493525 | 3.123810979556 |
| TV | 3.753961146805  | 0.000000000002  | 0.000000000001 |
| TV | 2.155107028998  | 5.595056728832  | 0.000000000000 |
| TV | -4.055934066849 | -3.819682435080 | 4.718204160564 |

# EQ'-CO<sub>2</sub> 15

|    |                 |                 |                 |
|----|-----------------|-----------------|-----------------|
| C  | -1.786929300814 | -0.353837451981 | 0.835406820025  |
| C  | 1.329090947084  | 4.696555975859  | -2.237843033290 |
| C  | 0.152414996223  | 0.363764312633  | 0.061451429841  |
| C  | 2.086573425473  | -0.353929334331 | 0.835314985114  |
| C  | 5.202657354827  | 4.696352461777  | -2.237910104507 |
| C  | 4.025908323504  | 0.363627316508  | 0.061375859934  |
| O  | 2.911399017352  | 7.228001907559  | 0.098113153790  |
| O  | -1.186262348140 | -1.569289015129 | 1.338134907652  |
| O  | -3.698809790847 | 1.376699532288  | 0.878929428944  |
| O  | -3.038690641723 | -0.702870568066 | 0.454908371202  |
| O  | 0.834776180000  | -0.702836897263 | 0.454865133973  |
| O  | 0.180992878214  | 2.876092569251  | -0.734760921219 |
| O  | -1.101066440854 | -0.039446290982 | -0.256877231546 |
| O  | 4.054538027635  | 2.875986393205  | -0.734854406245 |
| O  | 2.772466188188  | -0.039561068716 | -0.256965883049 |
| O  | 6.784858370631  | 7.228113211773  | 0.098191654246  |
| O  | 2.687254887784  | -1.569471916508 | 1.337979572547  |
| O  | 0.174633655378  | 1.376817420194  | 0.879015920307  |
| TV | 7.746990761129  | -0.000000000000 | -0.000000000000 |
| TV | 0.804737528036  | 5.070199008947  | 0.000000000003  |
| TV | -1.950118487292 | -2.340366304330 | 2.521400510340  |

# EQ'-CO<sub>2</sub> 16

|    |                 |                 |                 |
|----|-----------------|-----------------|-----------------|
| C  | 0.534519711330  | 0.370636885595  | -1.969268900079 |
| C  | 5.583261661250  | 2.407621185640  | 0.192455520078  |
| C  | 3.641569020821  | 1.346694715774  | 0.189652511143  |
| C  | 4.441642858569  | 0.370622273154  | -1.969213434447 |
| C  | 9.490391392393  | 2.407626454380  | 0.192438257502  |
| C  | 7.548698738892  | 1.346679407234  | 0.189664466706  |
| O  | 2.404829811302  | 1.400976544012  | -0.341689967646 |
| O  | -1.501298988373 | -1.003250552895 | -0.315057092397 |
| O  | 0.320747225935  | 0.199718512422  | -0.292776805950 |
| O  | -0.218152922199 | -0.924752819063 | 1.507693842823  |
| O  | 3.688956993427  | -0.924769885287 | 1.507694717568  |
| O  | -4.747240254945 | -2.023182338624 | -2.189245382530 |
| O  | -2.800604556280 | -0.843868289669 | -2.223141211022 |
| O  | -0.840066227970 | -2.023179782078 | -2.189261940960 |
| O  | 1.106517314153  | -0.843872590338 | -2.223162136700 |
| O  | 6.311962953178  | 1.400989347896  | -0.341661123556 |
| O  | 2.405844850426  | -1.003217163235 | -0.315055471223 |
| O  | 4.227911225701  | 0.199730730362  | -0.292816645133 |
| TV | 7.814271426095  | -0.000000000000 | 0.000000000000  |
| TV | 1.950437623683  | 3.390797897058  | 0.000000000000  |
| TV | 0.597221916079  | -1.179741482864 | 3.745741633390  |

# EQ'-CO<sub>2</sub> 17

|   |                 |                |                 |
|---|-----------------|----------------|-----------------|
| C | -1.795204529382 | 2.446794421501 | 1.279605702608  |
| C | 0.648103369216  | 2.180298485011 | -2.506230944167 |
| C | -0.120382489992 | 2.219603143694 | -0.345060995129 |
| C | -1.575708449258 | 6.106908623870 | 1.279665065268  |



|    |                 |                 |                 |
|----|-----------------|-----------------|-----------------|
| C  | 0.867486897113  | 5.840415228491  | -2.506295336904 |
| C  | 0.099098278866  | 5.879697903359  | -0.345102007992 |
| O  | 0.382282379140  | 3.463138138698  | -0.467594400520 |
| O  | -0.314734665574 | -0.026579838206 | 1.565274718426  |
| O  | -1.786883903955 | 1.854656689763  | 2.285398843155  |
| O  | -2.752802311148 | -1.795374806774 | -1.952804746255 |
| O  | -2.533327007015 | 1.864749342165  | -1.952753753167 |
| O  | 0.844819051686  | 1.607570696395  | 0.384871508119  |
| O  | -1.291220056305 | 1.907781713749  | 0.193794439376  |
| O  | 1.064401340899  | 5.267636785039  | 0.384696284729  |
| O  | -1.071586917300 | 5.567875248621  | 0.193927246091  |
| O  | 0.601810277809  | 7.123204415959  | -0.467571260828 |
| O  | -0.095357237120 | 3.633606879226  | 1.565213852871  |
| O  | -1.567597985825 | 5.514764903004  | 2.285441442031  |
| TV | 4.347087516526  | 0.000000000000  | 0.000000000000  |
| TV | 0.438881425386  | 7.320157146777  | -0.000000000000 |
| TV | 0.004975413885  | -1.870300303101 | 3.184158281580  |

# EQ'-CO<sub>2</sub> 18

|    |                 |                 |                 |
|----|-----------------|-----------------|-----------------|
| C  | 1.297941054891  | -1.309011243528 | 1.304851623258  |
| C  | -2.517513786026 | -1.312038974914 | -0.912519877338 |
| C  | -0.905860524063 | 0.149611473566  | 1.094860103183  |
| C  | 5.077255301542  | -1.309010921545 | 1.304863631775  |
| C  | 1.261797141443  | -1.312032429643 | -0.912536050870 |
| C  | 2.873454184661  | 0.149620170427  | 1.094861305667  |
| O  | -1.240596498984 | 0.706049374389  | -2.141698101480 |
| O  | -1.205688678843 | -1.302729354088 | -1.058484591797 |
| O  | 0.745732190612  | -0.030799582636 | 1.413943301178  |
| O  | 0.748700951800  | -0.079502720430 | -0.998533535647 |
| O  | 4.528011881619  | -0.079503261941 | -0.998525715337 |
| O  | -1.104521650027 | -1.318226080689 | -3.277929411065 |
| O  | 0.784847398512  | -1.875451871815 | 0.206249006218  |
| O  | 2.674791860433  | -1.318225767270 | -3.277933585892 |
| O  | 4.564158892005  | -1.875455637147 | 0.206263378483  |
| O  | 2.538716825320  | 0.706052969778  | -2.141696303279 |
| O  | 2.573617343431  | -1.302710219418 | -1.058496412488 |
| O  | 4.525046798075  | -0.030795984563 | 1.413955776316  |
| TV | 7.558627502200  | 0.000000000000  | -0.000000000000 |
| TV | -0.033308541802 | 3.930644814956  | -0.000000000000 |
| TV | 0.071325855952  | -1.893890335015 | 3.365023343238  |

# EQ'-CO<sub>2</sub> 19

|   |                 |                 |                 |
|---|-----------------|-----------------|-----------------|
| C | -3.437872391676 | -0.334947535761 | 0.832479367295  |
| C | 1.868778197040  | 3.245588748275  | -1.308549072041 |
| C | -0.170097057656 | 2.667231318011  | -1.523488622309 |
| C | -4.519724180594 | 3.064681816236  | 0.832455903875  |
| C | 0.786926348588  | 6.645182519706  | -1.308533082385 |
| C | -1.251959167697 | 6.066845158915  | -1.523461614732 |
| O | 0.166248493598  | 3.632892219611  | 0.368681304675  |
| O | -0.586101523928 | 1.344244183627  | 0.725729918797  |
| O | -2.702139827380 | 0.662359440483  | 1.377353299024  |
| O | -2.928281473367 | -0.958475190469 | -0.237860058033 |
| O | -4.010120690557 | 2.441166415697  | -0.237871300968 |
| O | 1.192966262648  | 2.089028549651  | 1.729705596724  |
| O | 0.186405620663  | 1.554455852658  | -1.526835705867 |
| O | 0.111132943968  | 5.488623640782  | 1.729709946420  |
| O | -0.895474612174 | 4.954059405217  | -1.526812558743 |

|    |                 |                 |                 |
|----|-----------------|-----------------|-----------------|
| O  | -0.915558869908 | 7.032514712164  | 0.368680887368  |
| O  | -1.667947035772 | 4.743841451339  | 0.725757090255  |
| O  | -3.783995550833 | 4.062005248578  | 1.377334358309  |
| TV | 5.826316166354  | 0.000000000000  | 0.000000000000  |
| TV | -2.163665910153 | 6.799237386886  | -0.000000000000 |
| TV | -1.276521137667 | -2.282244007079 | 2.575909938399  |

# EQ'-CO<sub>2</sub> 20

|    |                 |                 |                 |
|----|-----------------|-----------------|-----------------|
| C  | 0.702865193677  | -1.202143341618 | 0.851534186406  |
| C  | -2.486572929545 | -1.226277036467 | -1.159897301894 |
| C  | -2.226552797790 | 0.199363231560  | 1.475267795984  |
| C  | -1.039796522832 | -3.137014116581 | 3.748535736684  |
| C  | -4.229208107477 | -3.161155376667 | 1.737091459530  |
| C  | -3.969221777353 | -1.735511219611 | 4.372268088530  |
| O  | -0.757383775356 | 0.789914911743  | -1.440695121752 |
| O  | -1.338397006587 | -1.222080320004 | -0.525102243709 |
| O  | 0.169595733374  | 0.014533997515  | 0.596444295525  |
| O  | 1.479758365704  | 0.015415585751  | -1.445589826606 |
| O  | -0.262877023078 | -1.919462820309 | 1.451408548577  |
| O  | -0.162569687235 | -1.206100933335 | -2.406743128800 |
| O  | 0.876031883095  | -1.812748937257 | -0.397193568847 |
| O  | -1.905179586282 | -3.140978848881 | 0.490263467839  |
| O  | -0.866623627894 | -3.747611920782 | 2.499800589573  |
| O  | -2.500023957998 | -1.144960915635 | 1.456313561722  |
| O  | -3.081040698294 | -3.156957230568 | 2.371892164498  |
| O  | -1.573077772905 | -1.920333661862 | 3.493463760551  |
| TV | 4.388693486823  | -0.000000000000 | 0.000000000000  |
| TV | -0.031597732966 | 3.910499237742  | 0.000000000000  |
| TV | -3.485287284582 | -3.869768519127 | 5.794002548697  |

# EQ'-CO<sub>2</sub> 21

|    |                 |                 |                 |
|----|-----------------|-----------------|-----------------|
| C  | 1.885286676062  | -1.203344960424 | 1.381539471536  |
| C  | -2.598314802540 | -1.351599198161 | -0.795391635268 |
| C  | -0.867863106330 | 0.403901561054  | 0.788636973923  |
| C  | 2.951941749698  | -2.952503189147 | 4.637438381849  |
| C  | -1.531625855452 | -3.100687942048 | 2.460507185200  |
| C  | 0.198816300044  | -1.345214127361 | 4.044607285757  |
| O  | -1.880596451322 | 0.829845163744  | -2.318779629101 |
| O  | -1.347563341730 | -1.140125272740 | -1.282802808324 |
| O  | 1.215671525842  | -0.030109027499 | 1.603896251640  |
| O  | 0.735229472132  | -0.166097459661 | -0.734419157886 |
| O  | 1.801958823454  | -1.915174311022 | 2.521535680907  |
| O  | -1.754117431416 | -1.222761313824 | -3.443052127070 |
| O  | 1.264574813440  | -1.907808914871 | 0.427624947862  |
| O  | -0.687674234863 | -2.972111077043 | -0.187209850584 |
| O  | 2.331245369317  | -3.656945191736 | 3.683494113609  |
| O  | -0.813937853790 | -0.919310146360 | 0.937227571160  |
| O  | -0.280876671339 | -2.889226967405 | 1.973086071471  |
| O  | 2.282307628455  | -1.779316175379 | 4.859862707977  |
| TV | 3.951329442014  | -0.000000000000 | -0.000000000000 |
| TV | -0.529970752851 | 3.900895188177  | -0.000000000000 |
| TV | 2.133285126828  | -3.498276152030 | 6.511857981507  |

# EQ'-CO<sub>2</sub> 22

|   |                 |                |                 |
|---|-----------------|----------------|-----------------|
| C | -2.214950297986 | 1.510754506527 | 0.066230329034  |
| C | 1.445312545212  | 1.512545742274 | -0.451397615363 |
| C | -0.308487172132 | 1.511965887472 | -0.977508159046 |

|    |                 |                 |                 |
|----|-----------------|-----------------|-----------------|
| C  | -3.097349152531 | 1.507245299433  | 3.025750021083  |
| C  | 0.562914954814  | 1.509037046645  | 2.508114099439  |
| C  | -1.190883962263 | 1.508452524589  | 1.982010760325  |
| O  | 2.100793499772  | 3.914429248241  | 0.478183332127  |
| O  | -0.098301718290 | 0.782894340566  | 1.575873852681  |
| O  | -1.698508427323 | 2.290508182786  | 1.022356584521  |
| O  | -2.896600085164 | -0.889919378376 | -0.869243736875 |
| O  | -3.778999607211 | -0.893428694729 | 2.090257882416  |
| O  | 0.378499280754  | 2.236616190812  | -0.034506131348 |
| O  | -1.262647381607 | 0.731099437519  | -0.460345933326 |
| O  | -0.503899218239 | 2.233101771577  | 2.925011647849  |
| O  | -2.145039515651 | 0.727590890034  | 2.499184597991  |
| O  | 1.218393839799  | 3.910927624923  | 3.437687841660  |
| O  | -0.980698605701 | 0.779368538147  | 4.535395759567  |
| O  | -2.580902887421 | 2.286994749272  | 3.981869076470  |
| TV | 5.416998016508  | 0.000000000000  | 0.000000000000  |
| TV | -0.010023748154 | 3.128519430074  | -0.000000000000 |
| TV | -1.764794446946 | -0.007018571497 | 5.919025355554  |

# EQ'-CO<sub>2</sub> 23

|    |                 |                 |                 |
|----|-----------------|-----------------|-----------------|
| C  | 2.114639153045  | 2.361847527659  | -4.201317378544 |
| C  | 5.490507235235  | 1.970440789410  | -0.103309663011 |
| C  | 3.723175431260  | 1.000490482361  | 0.804031632191  |
| C  | 5.856651431975  | 2.361872010849  | -4.201310821925 |
| C  | 9.232507147572  | 1.970413868672  | -0.103369995267 |
| C  | 7.465201670352  | 1.000538859124  | 0.804022135560  |
| O  | 3.033826253021  | 1.590852796713  | -0.164367846347 |
| O  | -1.909446315325 | -1.942926077528 | 1.067863327313  |
| O  | 1.192498048473  | 1.206091549210  | -1.085765429161 |
| O  | -2.145081188970 | -2.981731664450 | 3.038116350751  |
| O  | 1.596871768542  | -2.981714807353 | 3.038190286919  |
| O  | -5.257421808419 | -1.532547036796 | -3.046107096034 |
| O  | -2.988769816485 | -0.741926620279 | -1.750544598076 |
| O  | -1.515462425704 | -1.532530134218 | -3.046119794615 |
| O  | 0.753136284571  | -0.742002678288 | -1.750540911478 |
| O  | 6.775796957526  | 1.590872386843  | -0.164356545201 |
| O  | 1.832497304791  | -1.942953603289 | 1.067906127803  |
| O  | 4.934527223517  | 1.206114986658  | -1.085770576683 |
| TV | 7.483945440203  | -0.000000000000 | 0.000000000000  |
| TV | 2.996260177886  | 3.798883143484  | 0.000000000001  |
| TV | -0.890096664566 | -2.431481293610 | 3.530040085848  |

# EQ'-CO<sub>2</sub> 24

|   |                 |                 |                 |
|---|-----------------|-----------------|-----------------|
| C | -2.206492117876 | 2.349308622572  | 0.841963411952  |
| C | 0.781890173648  | 1.256984461093  | -1.026174572547 |
| C | -0.759637902856 | 2.885668178892  | -0.846111719019 |
| C | -2.202866447735 | 0.743978194969  | 3.938796416805  |
| C | 0.785515526340  | -0.348340183921 | 2.070668944370  |
| C | -0.756014332370 | 1.280332557673  | 2.250716666340  |
| O | 0.202701092703  | 3.774867705965  | -0.703157096263 |
| O | -0.258732212628 | 0.300505467648  | 1.462030350399  |
| O | -1.965640364753 | 1.771659341863  | 2.041491729458  |
| O | -2.130243941507 | -2.404886513859 | -1.906484697411 |
| O | -2.126635128183 | -4.010240891082 | 1.190343857197  |
| O | 1.074127961136  | 1.722756977573  | 0.195648954420  |
| O | -0.998524567707 | 2.237379057432  | 0.317746726570  |
| O | 1.077756373771  | 0.117461461385  | 3.292470586632  |

|    |                 |                 |                 |
|----|-----------------|-----------------|-----------------|
| O  | -0.994917559495 | 0.631990833286  | 3.414546126627  |
| O  | 0.206279866500  | 2.169566501821  | 2.393782588287  |
| O  | -0.255142307519 | -1.304877750929 | 4.558896891883  |
| O  | -1.962001475635 | 0.166330586065  | 5.138335391068  |
| TV | 4.243650846533  | -0.000000000000 | -0.000000000000 |
| TV | -0.287510665144 | 3.784725250835  | 0.000000000000  |
| TV | 0.007245534538  | -3.210676478808 | 6.193681353442  |

# EQ'-CO<sub>2</sub> 25

|    |                 |                 |                 |
|----|-----------------|-----------------|-----------------|
| C  | -0.923869510799 | 1.006849166917  | 0.332250314519  |
| C  | -0.923066695020 | 3.818143509907  | -1.047921980711 |
| C  | 0.893558687817  | -1.068938034228 | -0.357733185257 |
| C  | -0.923958495542 | 0.310766293025  | 2.416568997230  |
| C  | -0.923256827775 | 3.122024221123  | 1.036230432416  |
| C  | 0.893534360799  | -1.765086720938 | 1.726312443433  |
| O  | -3.418026655396 | 10.421525080562 | -0.008670206473 |
| O  | 1.627456870491  | -2.808926140026 | 1.380278965408  |
| O  | -1.718544125442 | 2.065952493935  | 0.683046384452  |
| O  | -1.675619340032 | -0.018583985004 | -0.007130135926 |
| O  | -1.675949400559 | -0.714683440928 | 2.077356539634  |
| O  | -0.123953990049 | 1.360829555440  | -0.707800203920 |
| O  | 0.088970975791  | -1.421557227174 | 0.682412964863  |
| O  | -0.124172296817 | 0.664345064494  | 1.376345245291  |
| O  | 0.089044483680  | -2.117450487599 | 2.766713678398  |
| O  | -3.418101527424 | 9.725525837794  | 2.075596092166  |
| O  | 1.627232661892  | -3.504821966461 | 3.464562076837  |
| O  | -1.718756668898 | 1.369878353332  | 2.767146178357  |
| TV | 3.291356086161  | -0.000000000000 | -0.000000000000 |
| TV | -3.295041312304 | 6.960364357802  | 0.000000000001  |
| TV | -0.000338011505 | -1.392017836819 | 4.168431876240  |

# EQ'-CO<sub>2</sub> 26

|    |                 |                 |                 |
|----|-----------------|-----------------|-----------------|
| C  | 1.299011355825  | -1.261278918922 | 1.409245633197  |
| C  | -2.551514562416 | -1.260869096581 | -0.870526757001 |
| C  | -1.036195166374 | -0.426079058821 | 0.268807669412  |
| C  | 5.148454922109  | -1.261274317655 | 1.409265578671  |
| C  | 1.297945094056  | -1.260875662406 | -0.870547981814 |
| C  | 2.813262825249  | -0.426102418320 | 0.268788940093  |
| O  | -1.234349548499 | 0.755764703922  | -2.028017308654 |
| O  | -1.209105942802 | -1.178138510036 | -0.829364413791 |
| O  | 0.800925189568  | -0.000097158838 | 1.494096703031  |
| O  | 0.799957116063  | -0.000105282460 | -0.954455510232 |
| O  | 4.649404317017  | -0.000095108412 | -0.954421709431 |
| O  | -1.021548859458 | -1.194299978604 | -3.128708618838 |
| O  | 0.780082103092  | -1.806948836981 | 0.269676517492  |
| O  | 2.827873065816  | -1.194320554514 | -3.128729703222 |
| O  | 4.629530677694  | -1.806950021591 | 0.269699060892  |
| O  | 2.615105549048  | 0.755753821487  | -2.028033669801 |
| O  | 2.640358471830  | -1.178152890383 | -0.829398241337 |
| O  | 4.650359817170  | -0.000090772357 | 1.494118352202  |
| TV | 7.698898735144  | 0.000000000000  | 0.000000000000  |
| TV | -0.048407112680 | 3.867166805772  | -0.000000000000 |
| TV | 0.025986399588  | -1.933474355069 | 3.396124408107  |

# EQ'-CO<sub>2</sub> 27

|   |                 |                 |                |
|---|-----------------|-----------------|----------------|
| C | -1.240357225343 | -1.245493983332 | 0.823851972245 |
| C | 0.775473896333  | -0.713113410651 | 1.548962276837 |

|    |                 |                 |                |
|----|-----------------|-----------------|----------------|
| C  | -3.544922898902 | -3.682235564503 | 2.508442563031 |
| C  | -1.396805020601 | -3.283989854878 | 2.843578780019 |
| C  | -5.510932499452 | -6.385920819606 | 3.403742289669 |
| C  | -3.448063428034 | -5.622698516764 | 3.707138037333 |
| O  | -1.845987006002 | 1.286016648007  | 0.692639954012 |
| O  | -4.152569651310 | -1.323792078894 | 2.529000366053 |
| O  | -0.418647414880 | -0.276659168013 | 1.181440394811 |
| O  | -2.484374692989 | -2.880188830692 | 2.193814240289 |
| O  | -4.477722072679 | -3.423693072432 | 1.554756440145 |
| O  | -1.123247866209 | -4.430781547342 | 2.947208091381 |
| O  | -2.510613413041 | -0.880946227663 | 0.797992021693 |
| O  | -6.118511835963 | -3.855328899457 | 3.292474614204 |
| O  | 1.047840531805  | -1.861396983611 | 1.651169031050 |
| O  | -4.757420962639 | -5.483966326875 | 4.025988197638 |
| O  | -6.723924966671 | -5.958971574490 | 3.104746476753 |
| O  | -3.103099103889 | -6.921918034754 | 3.692871730683 |
| TV | 7.129743610357  | 0.000000000002  | 0.000000000001 |
| TV | -0.945558386570 | 3.659701930310  | 0.000000000002 |
| TV | -6.441481944380 | -7.734781552277 | 3.877655113314 |

# EQ'-CO<sub>2</sub> 28

|    |                 |                 |                 |
|----|-----------------|-----------------|-----------------|
| C  | -2.122705917810 | 0.463681497080  | 0.712540009060  |
| C  | 1.205706827445  | 3.472550781779  | -0.951151093055 |
| C  | -0.413107841246 | 0.409645773447  | -0.736539471588 |
| C  | 1.332428267011  | 0.463682777015  | 0.712531849465  |
| C  | 4.660830886363  | 3.472557289832  | -0.951163582832 |
| C  | 3.042033031988  | 0.409645588003  | -0.736537602685 |
| O  | 3.031152269857  | 8.153235496759  | -0.060370276698 |
| O  | -1.319542421941 | -2.160336452251 | 1.426562158022  |
| O  | -1.587869860816 | 1.404540456852  | 1.452934377344  |
| O  | -3.048381539671 | 1.189620594803  | 0.003865787030  |
| O  | 0.406745766782  | 1.189619928443  | 0.003857105421  |
| O  | -1.199458912499 | 1.234138890407  | -1.440252637997 |
| O  | -1.266683475821 | -0.291697389655 | 0.029676582460  |
| O  | 2.255682471070  | 1.234146181587  | -1.440246839387 |
| O  | 2.188447581641  | -0.291698819759 | 0.029667838700  |
| O  | 6.486215712244  | 8.153206212664  | -0.060372667902 |
| O  | 2.135610115986  | -2.160332323960 | 1.426575216680  |
| O  | 1.867257184646  | 1.404562074949  | 1.452898905653  |
| TV | 6.910263362146  | 0.000000000000  | 0.000000000000  |
| TV | 1.253329168298  | 5.168054653035  | 0.000000000000  |
| TV | -1.642131607317 | -1.681729618463 | 2.844817234202  |

# EQ'-CO<sub>2</sub> 29

|   |                 |                 |                 |
|---|-----------------|-----------------|-----------------|
| C | 1.048631459759  | 1.092572307457  | -2.151241972348 |
| C | 5.444231965623  | 2.083276842823  | 0.177915590089  |
| C | 3.506424067670  | 0.948566835475  | 0.196106646124  |
| C | 2.996490956655  | 4.452108459397  | -2.151256904123 |
| C | 7.392056505167  | 5.442812722460  | 0.177907649569  |
| C | 5.454248074681  | 4.308109077328  | 0.196100368953  |
| O | 2.253738051726  | 1.021169253657  | -0.302530313737 |
| O | -1.646154826663 | -1.344133805726 | -0.307343812213 |
| O | 0.170341246879  | -0.145647189337 | -0.326751248288 |
| O | -0.328050772938 | -1.205851496590 | 1.520221775200  |
| O | 1.619793940469  | 2.153685572991  | 1.520229932435  |
| O | -4.215264322289 | -1.255716504034 | -2.240426267866 |
| O | -2.275840254504 | -0.109415105691 | -2.277791429733 |

|    |                 |                 |                 |
|----|-----------------|-----------------|-----------------|
| O  | -2.267446887309 | 2.103806668571  | -2.240350231596 |
| O  | -0.328001669606 | 3.250118714076  | -2.277786392608 |
| O  | 4.201566251092  | 4.380716407789  | -0.302549255696 |
| O  | 0.301669797076  | 2.015390667635  | -0.307340734776 |
| O  | 2.118165689193  | 3.213890693453  | -0.326751762850 |
| TV | 3.895869587377  | -0.000000000000 | -0.000000000000 |
| TV | 3.895654422174  | 6.719069995057  | 0.000000000000  |
| TV | -0.046315070397 | -2.199932548660 | 3.837313568200  |

# EQ'-CO<sub>2</sub> 30

|    |                 |                 |                 |
|----|-----------------|-----------------|-----------------|
| C  | -1.839704113951 | 0.445833677829  | 0.699803863926  |
| C  | 0.494082450402  | 2.751766799016  | -1.696284069506 |
| C  | 0.521151493517  | 0.551929369762  | -0.822300914391 |
| C  | -3.763501762073 | 3.762741376351  | 0.699713654196  |
| C  | -1.429706556020 | 6.068727412699  | -1.696424964751 |
| C  | -1.402635993448 | 3.868919286911  | -0.822314129318 |
| O  | -0.153893739372 | 6.102349726417  | -1.258158756675 |
| O  | 0.107481214575  | -0.392688801471 | 2.556827722078  |
| O  | -1.259891003328 | 1.614369435434  | 0.891217335815  |
| O  | -3.142017440876 | 0.525574345305  | 0.506705968792  |
| O  | -5.065841413472 | 3.842524214392  | 0.506681077663  |
| O  | -0.153170196217 | 1.679090602788  | -1.151389975848 |
| O  | -1.250854503197 | -0.567192780098 | 0.706532617707  |
| O  | -2.077005129277 | 4.996040629850  | -1.151531051737 |
| O  | -3.174761924225 | 2.749662915307  | 0.706616894018  |
| O  | -2.077628315853 | 9.419258777047  | -1.258055135009 |
| O  | -1.816261671292 | 2.924191897029  | 2.556902936935  |
| O  | -3.183612416689 | 4.931285990465  | 0.891029139636  |
| TV | 3.846312918958  | -0.000000000000 | -0.000000000000 |
| TV | -3.847544072005 | 6.633806898146  | -0.000000000000 |
| TV | -1.671290196545 | -0.973430215864 | 3.916858033490  |

# EQ'-CO<sub>2</sub> 31

|    |                 |                 |                 |
|----|-----------------|-----------------|-----------------|
| C  | 0.563884290716  | 1.343652468216  | -0.101903496840 |
| C  | -0.039296219114 | -1.589934345531 | -2.040850672265 |
| C  | 2.836600414461  | 1.345920505984  | -0.102451058271 |
| C  | 2.234562573229  | -1.587750100053 | -2.039995540654 |
| C  | 5.110035440091  | 1.341781613952  | -0.102068695624 |
| C  | 4.508876464754  | -1.588546273218 | -2.038761331949 |
| O  | 0.879071342563  | 0.332114727612  | -0.595998047024 |
| O  | 3.148738247924  | 0.333550053015  | -0.596739896267 |
| O  | -0.411800241871 | -0.496960517214 | 1.247454989802  |
| O  | 1.862980227705  | -0.496088191088 | 1.251722123502  |
| O  | 2.949290759069  | 1.545848860400  | 1.191041545771  |
| O  | 4.479465555648  | 2.357505114468  | -0.675829093195 |
| O  | 0.678744264153  | 1.545503748253  | 1.191588133013  |
| O  | 5.422517794265  | 0.331110869972  | -0.599502691480 |
| O  | 2.202400151866  | 2.359776589512  | -0.677321739040 |
| O  | 4.136351776987  | -0.498600902702 | 1.249012330898  |
| O  | 5.226352784768  | 1.543339971684  | 1.191466001803  |
| O  | 6.752320078308  | 2.356804820556  | -0.678316916353 |
| TV | 6.821822057370  | -0.000000000000 | -0.000000000000 |
| TV | -0.018794806684 | 3.978936498430  | 0.000000000000  |
| TV | -1.523081453123 | 0.437170368278  | 3.683475096756  |

# EQ'-CO<sub>2</sub> 32

|   |                 |                 |                |
|---|-----------------|-----------------|----------------|
| C | -3.355007028196 | -0.135797119240 | 0.928322119089 |
|---|-----------------|-----------------|----------------|

|    |                 |                 |                 |
|----|-----------------|-----------------|-----------------|
| C  | 1.669581744966  | 3.724611801768  | -1.397192369024 |
| C  | 0.234186241447  | 2.144384352183  | -1.509597788889 |
| C  | -4.648769986498 | 3.424037080253  | 0.928307336324  |
| C  | 0.375816430835  | 7.284421458484  | -1.397183914420 |
| C  | -1.059574300013 | 5.704203600779  | -1.509563461373 |
| O  | 0.167916103700  | 4.545001290803  | 0.720810268721  |
| O  | -0.683209759784 | 0.580300849980  | 0.322331988129  |
| O  | -2.306230201210 | -0.014761278286 | 1.761705974022  |
| O  | -2.747014995626 | -0.539018556473 | -0.235476487985 |
| O  | -4.040777032342 | 3.020827630224  | -0.235487967465 |
| O  | 0.003727920012  | 2.470352123408  | 1.357995233983  |
| O  | 0.627941980201  | 1.051444997983  | -1.511684400037 |
| O  | -1.290028126683 | 6.030164618975  | 1.358006880272  |
| O  | -0.665804220208 | 4.611269311367  | -1.511674966835 |
| O  | -1.125829535985 | 8.104817264260  | 0.720800193303  |
| O  | -1.976969854418 | 4.140119520436  | 0.322343450071  |
| O  | -3.599997574331 | 3.545062661155  | 1.761713569803  |
| TV | 5.506387869727  | 0.000000000000  | 0.000000000000  |
| TV | -2.587511853591 | 7.119640758186  | 0.000000000000  |
| TV | -1.474153150340 | -2.559007928910 | 2.552265491129  |

# EQ'-CO<sub>2</sub> 33

|    |                 |                 |                 |
|----|-----------------|-----------------|-----------------|
| C  | -1.489464552292 | -0.034366052018 | -1.255576258069 |
| C  | -0.390524321273 | 1.345790784656  | 1.003129966036  |
| C  | 0.136063572006  | 1.487470902963  | -1.637824985408 |
| C  | 2.326232972749  | -0.034379761897 | -1.255583634012 |
| C  | 3.425180950012  | 1.345793249103  | 1.003159497256  |
| C  | 3.951737465073  | 1.487467291515  | -1.637831218449 |
| O  | 2.225543072359  | 8.566281858985  | 0.240101031576  |
| O  | -1.009715202259 | 0.282496991414  | 1.500250696262  |
| O  | -2.902549687538 | 1.218047589572  | 1.057378471961  |
| O  | -2.212179985096 | -0.488870547450 | -0.261357305727 |
| O  | 1.603501519218  | -0.488872203765 | -0.261375470334 |
| O  | -0.930045048490 | 2.311654091276  | 0.628135095614  |
| O  | -0.357630555152 | 0.520206469811  | -0.831642184260 |
| O  | 2.885635282046  | 2.311640495730  | 0.628162896641  |
| O  | 3.458045483475  | 0.520227224602  | -0.831642216923 |
| O  | 6.041259148751  | 8.566284017947  | 0.240106748198  |
| O  | 2.805984852589  | 0.282520567839  | 1.500275017312  |
| O  | 0.913139004444  | 1.218043049546  | 1.057396334020  |
| TV | 7.631390234764  | 0.000000000000  | 0.000000000000  |
| TV | 1.280983097043  | 5.094385642916  | 0.000000000001  |
| TV | -2.374363870004 | -1.443729214434 | 2.618670320003  |

# EQ'-CO<sub>2</sub> 34

|   |                 |                 |                 |
|---|-----------------|-----------------|-----------------|
| C | -1.670977165528 | -0.365940339553 | 0.791804121850  |
| C | 0.864248563003  | 3.890239893253  | -1.731081170043 |
| C | 0.294000518492  | 0.403568940477  | -0.010557045600 |
| C | 2.228080583674  | -0.365949032727 | 0.791800046994  |
| C | 4.763300061293  | 3.890238088660  | -1.731076711900 |
| C | 4.193048399829  | 0.403567223521  | -0.010562652755 |
| O | 2.738002194743  | 7.652895698714  | 0.075386697102  |
| O | -1.078527214837 | -1.420424716043 | 1.371084766366  |
| O | -3.758373647692 | 1.500694206916  | 0.761786455455  |
| O | -2.944101628116 | -0.682272637426 | 0.453832026952  |
| O | 0.954944991868  | -0.682261569769 | 0.453845209395  |
| O | 0.279239953151  | 2.990633839916  | -0.943445201823 |

|    |                 |                 |                 |
|----|-----------------|-----------------|-----------------|
| O  | -0.955802284962 | -0.094015452219 | -0.331584504729 |
| O  | 4.178299272189  | 2.990634020893  | -0.943439087589 |
| O  | 2.943242778188  | -0.094005336844 | -0.331581415363 |
| O  | 6.637046161936  | 7.652909453665  | 0.075397054945  |
| O  | 2.820520500630  | -1.420433554414 | 1.371073797250  |
| O  | 0.140665410134  | 1.500689831049  | 0.761793271223  |
| TV | 7.798095067731  | -0.000000000000 | -0.000000000000 |
| TV | 0.576772966898  | 5.223318914241  | 0.000000000003  |
| TV | -2.045422472430 | -2.224113465755 | 2.484880366549  |

# EQ'-CO<sub>2</sub> 35

|    |                 |                 |                |
|----|-----------------|-----------------|----------------|
| C  | -0.659689645246 | -0.880422878363 | 0.223202078709 |
| C  | -0.426419289256 | -0.817707024730 | 2.045799787865 |
| C  | -2.870728932542 | -3.445274052673 | 1.800362382029 |
| C  | -2.668634935671 | -3.371196611777 | 3.625819757357 |
| C  | -5.108477184258 | -6.020332761456 | 3.382576240609 |
| C  | -4.880038395275 | -5.941456384358 | 5.205381554733 |
| O  | -1.488232444371 | 1.269657694455  | 0.082739819745 |
| O  | -3.680435788652 | -1.293089676710 | 1.662684888497 |
| O  | 0.328283844314  | -0.297142358651 | 0.995725546618 |
| O  | -1.902964957627 | -2.845674835094 | 2.588038517424 |
| O  | -3.799077405213 | -3.368383427705 | 2.830944108556 |
| O  | -2.097443459490 | -4.585950738758 | 3.764551481984 |
| O  | -1.566202615233 | -0.797347228662 | 1.267706536023 |
| O  | -5.913766709365 | -3.868278977469 | 3.244990437752 |
| O  | 0.149135494499  | -2.031503550846 | 2.182603653982 |
| O  | -4.138271649133 | -5.413516416120 | 4.157187375671 |
| O  | -6.025103125000 | -5.954357801722 | 4.427469729240 |
| O  | -4.279590175599 | -7.145016756019 | 5.342299381477 |
| TV | 6.172280985106  | 0.000000000005  | 0.000000000006 |
| TV | -0.887308903267 | 3.495139926962  | 0.000000000002 |
| TV | -6.669509625530 | -7.688500962458 | 4.738618116878 |

# EQ'-CO<sub>2</sub> 36

|    |                 |                 |                |
|----|-----------------|-----------------|----------------|
| C  | -0.141507856810 | -2.027395690822 | 1.082846596556 |
| C  | -0.572156619513 | -0.252652508800 | 1.096045893282 |
| C  | -2.487568907070 | -4.733284764170 | 2.741816412137 |
| C  | -2.917895606231 | -2.958476066468 | 2.754694939445 |
| C  | -4.828894583607 | -7.425240491639 | 4.396504090159 |
| C  | -5.259254914583 | -5.650148433712 | 4.409188811226 |
| O  | -1.036797174833 | 0.568149747293  | 0.119794285363 |
| O  | -3.375172538214 | -2.136224684705 | 1.776451703612 |
| O  | -0.553214592585 | 0.700295542609  | 2.060208839673 |
| O  | -2.899913845485 | -2.006815425598 | 3.718950033779 |
| O  | -3.653513125059 | -4.088662356270 | 2.952711684517 |
| O  | -1.752207744937 | -3.603584178107 | 2.546303016897 |
| O  | -1.305544096900 | -1.382074362953 | 1.295483984068 |
| O  | -5.726291752645 | -4.829922547442 | 3.433674153941 |
| O  | 0.593921898660  | -0.896998100656 | 0.883814896770 |
| O  | -5.231501988576 | -4.695744026279 | 5.372779775827 |
| O  | -5.992410320738 | -6.779411690882 | 4.612064634593 |
| O  | -4.096582320761 | -6.295936786610 | 4.192585598309 |
| TV | 5.856053760389  | 0.000000000001  | 0.000000000000 |
| TV | -0.870851368313 | 3.549763215491  | 0.000000000000 |
| TV | -7.025128163719 | -8.089162765206 | 4.964519182427 |

# EQ'-CO<sub>2</sub> 37



|    |                 |                 |                 |
|----|-----------------|-----------------|-----------------|
| C  | -2.197068078534 | 2.804356932337  | 1.159788117002  |
| C  | 0.379036445448  | 1.293911032663  | -1.748205518434 |
| C  | -0.909721534179 | 2.773839271108  | -0.462898563025 |
| C  | -3.832476315413 | 6.270023211229  | 1.159790292732  |
| C  | -1.256422227866 | 4.759567477474  | -1.748197416390 |
| C  | -2.545159702534 | 6.239510031527  | -0.462885237771 |
| O  | 0.048275514729  | 2.534794531620  | 0.456815523710  |
| O  | 1.085425300329  | 0.904205878406  | 1.549125915553  |
| O  | -1.699637091406 | 2.387994426186  | 2.136557713010  |
| O  | -1.302387706586 | -1.675931376573 | -2.064254449604 |
| O  | -2.937799970237 | 1.789733415841  | -2.064275912564 |
| O  | 0.489572017943  | 0.642242194150  | -0.571656189765 |
| O  | -2.060161613339 | 2.223707537323  | -0.018028033226 |
| O  | -1.145863798180 | 4.107896092885  | -0.571653035630 |
| O  | -3.695595258639 | 5.689387463670  | -0.018031741035 |
| O  | -1.587124077044 | 6.000446420595  | 0.456804591160  |
| O  | -0.550023844878 | 4.369874519696  | 1.549130071647  |
| O  | -3.335037793660 | 5.853660313361  | 2.136549530305  |
| TV | 4.533560041740  | -0.000000000000 | 0.000000000000  |
| TV | -3.270851965869 | 6.931315690682  | 0.000000000000  |
| TV | 1.630558066333  | -1.361392566875 | 3.200890430555  |

# EQ'-CO<sub>2</sub> 38

|    |                 |                 |                 |
|----|-----------------|-----------------|-----------------|
| C  | -2.417155040853 | 1.330531837877  | 0.057624526222  |
| C  | 1.192548438981  | 2.690509873346  | -0.396521124798 |
| C  | -0.472023649895 | 2.067893537956  | -0.823773113777 |
| C  | -3.473382391533 | -0.582157879051 | 2.649035038434  |
| C  | 0.136313354933  | 0.777820937509  | 2.194897923003  |
| C  | -1.528253782440 | 0.155205953218  | 1.767641912208  |
| O  | 0.885406575847  | 4.005963924807  | -0.118141849273 |
| O  | -0.322206112151 | 0.099130242616  | 1.056935957876  |
| O  | -2.029041842191 | 1.367766124845  | 1.354762984469  |
| O  | -1.783407818733 | -1.017969954275 | -0.270028122300 |
| O  | -2.839635606457 | -2.930669886468 | 2.321366709050  |
| O  | 0.181703573798  | 2.149177517223  | 0.357561220250  |
| O  | -1.395406444952 | 1.121271146917  | -0.800683445640 |
| O  | -0.874529896350 | 0.236483804992  | 2.948976290607  |
| O  | -2.451633784043 | -0.791422128161 | 1.790728994801  |
| O  | -0.170822822973 | 2.093274356752  | 2.473279865257  |
| O  | -1.378424129588 | -1.813556499198 | 3.648349412316  |
| O  | -3.085258202225 | -0.544912495853 | 3.946170406308  |
| TV | 5.387982579095  | -0.000000000000 | -0.000000000000 |
| TV | -1.121599932218 | 3.565045118819  | -0.000000000000 |
| TV | -2.112448743411 | -3.825371455882 | 5.182822489542  |

# EQ'-CO<sub>2</sub> 39

|   |                 |                 |                 |
|---|-----------------|-----------------|-----------------|
| C | -2.302939302236 | 0.915248039160  | 0.018093983898  |
| C | 1.483622792703  | 2.485415358440  | -0.528040363583 |
| C | -0.413167731822 | 2.477018977831  | -0.557819527882 |
| C | -3.696459092442 | -1.952106688616 | 2.378280404889  |
| C | 0.090098916248  | -0.381936377682 | 1.832149098066  |
| C | -1.806687968989 | -0.390335119997 | 1.802365375034  |
| O | 0.749950053923  | 5.094456037759  | -0.215530463782 |
| O | -0.846055253130 | -0.733338205029 | 0.887765456989  |
| O | -2.478444378726 | 0.646672537949  | 1.366979280401  |
| O | -2.131630680360 | -0.147654586120 | -0.852230782458 |
| O | -3.525169815547 | -3.014996400870 | 1.507934114830  |

|    |                 |                 |                 |
|----|-----------------|-----------------|-----------------|
| O  | 0.522062142022  | 2.798718547034  | 0.397210236223  |
| O  | -1.064087984256 | 1.428021149835  | -0.097921124294 |
| O  | -0.871468555596 | -0.068614661880 | 2.757390757673  |
| O  | -2.457605471186 | -1.439321106207 | 2.262317652559  |
| O  | -0.643576384802 | 2.227112582891  | 2.144655570067  |
| O  | -2.239590207723 | -3.600691146032 | 3.247945459878  |
| O  | -3.871980840741 | -2.220678883685 | 3.727161607327  |
| TV | 5.674870183217  | 0.000000000000  | -0.000000000000 |
| TV | -1.383306913320 | 3.708460945120  | -0.000000000000 |
| TV | -2.787059505859 | -5.734702110570 | 4.720364450463  |

# EQ'-CO<sub>2</sub> 40

|    |                 |                 |                 |
|----|-----------------|-----------------|-----------------|
| C  | -0.377325023425 | -2.158836608310 | 0.891031479673  |
| C  | -0.614561326826 | -0.566970014801 | 1.781055595268  |
| C  | -2.523355946335 | -4.719130138519 | 2.434384279692  |
| C  | -2.760652469557 | -3.127300778374 | 3.324425593651  |
| C  | -4.669463833058 | -7.279444030870 | 3.977741275458  |
| C  | -4.906715177057 | -5.687594036386 | 4.867826769304  |
| O  | -1.501361163433 | 0.522438203317  | -0.048260536349 |
| O  | -3.647471435334 | -2.037877272867 | 1.495119398057  |
| O  | -0.666234837919 | 0.725875084141  | 1.888609850548  |
| O  | -2.812339949815 | -1.834460982195 | 3.431938216738  |
| O  | -3.669625329519 | -4.032979955486 | 2.796655927989  |
| O  | -1.790098792944 | -3.540573057864 | 2.429036541807  |
| O  | -1.523565152379 | -1.472651814683 | 1.253294578751  |
| O  | -5.793546971191 | -4.598195785770 | 3.038468257659  |
| O  | 0.355947241570  | -0.980278849180 | 0.885673058249  |
| O  | -4.958460457688 | -4.394750658877 | 4.975358579226  |
| O  | -5.815686704650 | -6.593239148090 | 4.339989811878  |
| O  | -3.936166301205 | -6.100904669772 | 3.972448560082  |
| TV | 6.186226839341  | 0.000000000001  | -0.000000000000 |
| TV | -0.912681833937 | 3.548148266556  | 0.000000000000  |
| TV | -6.438256780820 | -7.680957764268 | 4.630094190000  |

# EQ'-CO<sub>2</sub> 41

|    |                 |                 |                 |
|----|-----------------|-----------------|-----------------|
| C  | -1.702691281769 | 0.384555294875  | 0.075474891228  |
| C  | -0.350454463052 | 3.659623063039  | -1.022424208305 |
| C  | 0.209877187326  | 1.546079970600  | -0.543312320446 |
| C  | -1.624335836371 | -2.302010446015 | 2.564653339165  |
| C  | -0.272007218280 | 0.973051005598  | 1.466667787954  |
| C  | 0.288277401485  | -1.140479601145 | 1.945792932690  |
| O  | -0.267796993973 | 6.287339989466  | -0.323746556274 |
| O  | 0.338459202787  | -0.173197212247 | 1.011925605688  |
| O  | -1.555540656854 | 0.608240158679  | 1.496668413892  |
| O  | -1.921956460756 | -0.930078452246 | 0.033023865343  |
| O  | -1.843511429056 | -3.616650007259 | 2.522109859271  |
| O  | -0.263906252098 | 2.033291118636  | 0.600890588820  |
| O  | -0.598417393402 | 0.527575211265  | -0.877532387316 |
| O  | -0.185461588648 | -0.653225022734 | 3.090012808253  |
| O  | -0.519967561993 | -2.158997461426 | 1.611599129978  |
| O  | -0.189395090589 | 3.600768445009  | 2.165353850645  |
| O  | 0.416893544463  | -2.859750440959 | 3.501015100388  |
| O  | -1.477096726939 | -2.078316714436 | 3.985756265375  |
| TV | 4.027197113585  | -0.000000000000 | 0.000000000000  |
| TV | -1.782697230209 | 4.976897478251  | 0.000000000000  |
| TV | 0.156899898978  | -5.373111296564 | 4.978186369477  |

# EQ'-CO<sub>2</sub> 42

|    |                 |                 |                 |
|----|-----------------|-----------------|-----------------|
| C  | -0.815348946245 | -0.070203004432 | 0.706420804516  |
| C  | -0.941116863981 | 3.498221116919  | -0.268943264491 |
| C  | 0.692707549201  | 0.001553913694  | -1.454140331290 |
| C  | 2.314378904540  | -0.070194334474 | 0.706411738155  |
| C  | 2.188613409080  | 3.498234259558  | -0.268949464316 |
| C  | 3.822459790566  | 0.001565937834  | -1.454156838662 |
| O  | -3.479900774642 | 11.435396030172 | -0.294636500505 |
| O  | 1.592758974668  | -3.349764509467 | 0.814226942767  |
| O  | -1.527737827890 | 1.109935784019  | 0.851332918953  |
| O  | -1.602012319707 | -1.121077247395 | 0.810413297412  |
| O  | 1.527712063370  | -1.121065179694 | 0.810432740739  |
| O  | -0.228765998428 | 2.342846328297  | -0.387986441205 |
| O  | -0.023834271686 | 0.008293605012  | -0.340969188667 |
| O  | 2.900979868580  | 2.342844986309  | -0.387968332525 |
| O  | 3.105880339944  | 0.008292112158  | -0.340999115028 |
| O  | -0.350134257023 | 11.435390216237 | -0.294630790132 |
| O  | 4.722505498190  | -3.349758324874 | 0.814213548816  |
| O  | 1.602000338683  | 1.109950136086  | 0.851339886575  |
| TV | 6.259464723054  | -0.000000000000 | 0.000000000000  |
| TV | -3.320162749903 | 6.848996045053  | 0.000000000001  |
| TV | 0.118347433817  | -2.235725517739 | 2.271544652941  |

# EQ'-CO<sub>2</sub> 43

|    |                 |                 |                 |
|----|-----------------|-----------------|-----------------|
| C  | -2.482343693685 | 1.329978504778  | 0.043630181008  |
| C  | 1.428929866121  | 2.918598407634  | -0.972009901717 |
| C  | -0.396446264579 | 1.939287622189  | -0.658129692930 |
| C  | -3.877955980611 | -0.335859327907 | 2.597077149541  |
| C  | 0.033323405695  | 1.252723884162  | 1.581470038429  |
| C  | -1.792078046875 | 0.273435795150  | 1.895353236233  |
| O  | 0.993976918307  | 3.917172356560  | -0.026480443042 |
| O  | -0.621149570581 | 0.100687982799  | 1.191949507746  |
| O  | -2.208089163018 | 1.493474302406  | 1.385812141011  |
| O  | -1.840218262694 | -1.022832142645 | -0.401901783930 |
| O  | -3.235563189468 | -2.688705224628 | 2.151180351801  |
| O  | 0.102441758065  | 2.107654230717  | 0.565121445028  |
| O  | -1.334463404323 | 1.031369892370  | -0.695860656157 |
| O  | -1.293230126754 | 0.441814157977  | 3.118611435390  |
| O  | -2.730039744672 | -0.634534863067 | 1.857691898334  |
| O  | -0.401617433474 | 2.251245114883  | 2.527060953011  |
| O  | -2.016951410998 | -1.565165427624 | 3.745404718293  |
| O  | -3.603960924665 | -0.172377112925 | 3.939294801124  |
| TV | 5.398337380131  | -0.000000000000 | 0.000000000000  |
| TV | -0.997988778054 | 3.555891925641  | 0.000000000000  |
| TV | -2.791377583712 | -3.331791739618 | 5.106976327006  |

# EQ'-CO<sub>2</sub> 44

|   |                 |                 |                |
|---|-----------------|-----------------|----------------|
| C | 0.122209154740  | -1.843599546414 | 1.336156036215 |
| C | -0.930912411202 | -0.607000946525 | 0.478768265449 |
| C | 3.720955322326  | -1.839849439189 | 1.334284554650 |
| C | 2.670525091843  | -0.602137663946 | 0.477075436700 |
| C | 7.306591435237  | -1.841885652340 | 1.336579159130 |
| C | 6.262971962136  | -0.597516585618 | 0.478264155931 |
| O | -1.400027594502 | 0.580438483457  | 0.254002563660 |
| O | 2.202913445267  | 0.585673222711  | 0.252113391091 |
| O | -1.243832310783 | 0.698420866024  | 2.367326554477 |
| O | 2.360912029682  | 0.705585298464  | 2.364164264057 |

|    |                 |                 |                 |
|----|-----------------|-----------------|-----------------|
| O  | 2.381450332850  | -1.506031764058 | 1.483070559734  |
| O  | 4.010516360874  | -0.583725488918 | 0.840453312688  |
| O  | -1.216483690551 | -1.510183671001 | 1.486187811575  |
| O  | 5.791150985058  | 0.588245533931  | 0.250426628125  |
| O  | 0.411386856551  | -0.585365890433 | 0.841381883241  |
| O  | 5.933046243531  | 0.694496115431  | 2.368446066677  |
| O  | 5.966838830158  | -1.508446537830 | 1.476456266531  |
| O  | 7.600239142882  | -0.580308302241 | 0.855661828575  |
| TV | 10.783521413364 | 0.000000000000  | -0.000000000000 |
| TV | -1.833686169751 | 3.171239367964  | -0.000000000000 |
| TV | -1.767580320401 | -1.120271021560 | 2.969089198142  |

# EQ'-CO<sub>2</sub> 45

|    |                 |                 |                 |
|----|-----------------|-----------------|-----------------|
| C  | 0.090903677887  | -1.595015833812 | 1.504627756375  |
| C  | -2.110432413721 | -0.378549616469 | 0.691585617709  |
| C  | 0.107910449099  | -0.379469457175 | 3.327608761060  |
| C  | -2.093228183071 | 0.836986056269  | 2.515021778925  |
| C  | 0.123130192534  | 0.835791609343  | 5.151174538226  |
| C  | -2.078080329082 | 2.052404013915  | 4.338714767949  |
| O  | -2.120182479523 | -0.317948192384 | -0.666215848272 |
| O  | -2.104187412563 | 0.898565142875  | 1.157087361284  |
| O  | 0.111698355629  | 2.299531401373  | 2.862646608067  |
| O  | 0.126944996314  | 3.515471661461  | 4.685867619711  |
| O  | -0.987175755993 | 0.236166591309  | 2.921244525710  |
| O  | 1.214300369319  | 0.219958061071  | 2.922496896755  |
| O  | -1.012534374731 | -0.986913643524 | 1.102249823565  |
| O  | -2.088735859332 | 2.113468904885  | 2.980474858927  |
| O  | 1.188315279648  | -0.987599482315 | 1.094042317185  |
| O  | 0.143858811195  | 4.731102688133  | 6.509645076723  |
| O  | -0.974102284455 | 1.450803109219  | 4.746044516885  |
| O  | 1.225530810824  | 1.441103480013  | 4.744300616659  |
| TV | 4.401524682310  | 0.000000000000  | -0.000000000000 |
| TV | 0.013377641947  | 3.955920669853  | 0.000000000000  |
| TV | 0.047485699837  | 3.647430209367  | 5.470484928259  |

# EQ'-CO<sub>2</sub> 46

|    |                 |                 |                 |
|----|-----------------|-----------------|-----------------|
| C  | 0.358809731149  | 0.452239296894  | -1.794705594736 |
| C  | 5.181252782419  | 2.272318165456  | 0.489415583412  |
| C  | 2.759571659531  | 0.454144299879  | 0.065442620382  |
| C  | 4.025586472847  | 0.452238015225  | -1.794713430295 |
| C  | 8.848046703734  | 2.272317138670  | 0.489430328653  |
| C  | 6.426351284847  | 0.454141034539  | 0.065446922615  |
| O  | 2.250774148991  | 1.596436392605  | -0.368894880435 |
| O  | -1.175284873995 | -0.805526031209 | -0.373382717884 |
| O  | 0.391027880080  | 0.553768626481  | -0.445629998815 |
| O  | 0.573175569837  | -0.756263117729 | 1.270282955171  |
| O  | 4.239957974865  | -0.756251182583 | 1.270272141984  |
| O  | -4.470046276145 | -2.123895644709 | -2.161438930331 |
| O  | -2.625624813892 | -0.712618148951 | -2.122469116264 |
| O  | -0.803257515113 | -2.123884117450 | -2.161442802604 |
| O  | 1.041168323140  | -0.712619888369 | -2.122463518570 |
| O  | 5.917552946018  | 1.596427228862  | -0.368893992069 |
| O  | 2.491502904099  | -0.805529706270 | -0.373370672099 |
| O  | 4.057808803359  | 0.553760273910  | -0.445635693942 |
| TV | 7.333575274961  | -0.000000000000 | -0.000000000000 |
| TV | 1.782447382340  | 3.786073307023  | 0.000000000000  |
| TV | 1.449338301994  | -1.261386901619 | 3.525166658601  |

# EQ'-CO<sub>2</sub> 47

|    |                 |                 |                 |
|----|-----------------|-----------------|-----------------|
| C  | -0.377160942107 | -1.904611296039 | 0.488976259789  |
| C  | -2.668733823812 | -0.495221202435 | 1.181622255794  |
| C  | -1.441453841509 | -2.728958078688 | 2.207598130096  |
| C  | -3.734800723532 | -1.320964120627 | 2.899349968717  |
| C  | -2.507271449346 | -3.554900707609 | 3.925215029591  |
| C  | -4.800773581369 | -2.144386816899 | 4.615702505369  |
| O  | -2.128435740115 | 0.607214210839  | 0.660455343951  |
| O  | -3.192899870966 | -0.220538603494 | 2.379864494575  |
| O  | 1.963151057497  | 1.959682359000  | 2.389406941525  |
| O  | 0.893531917923  | 1.139140241851  | 4.100713118020  |
| O  | -1.975584140642 | -3.832961782145 | 2.730579097710  |
| O  | -1.427020496972 | -1.676006614663 | 2.724780478355  |
| O  | -0.915576513873 | -3.006428036030 | 1.009787869936  |
| O  | -4.263522976201 | -1.041789752353 | 4.092340911700  |
| O  | -0.366186388666 | -0.849485100524 | 1.001216557314  |
| O  | -0.170941977036 | 0.312643557194  | 5.816155750162  |
| O  | -3.045486133718 | -4.658726157868 | 4.446528114302  |
| O  | -2.497785977170 | -2.501484862989 | 4.441171712671  |
| TV | 4.610762567067  | -0.000000000000 | 0.000000000000  |
| TV | 1.094825556217  | 4.337230654406  | -0.000000000000 |
| TV | -3.195723654884 | -2.476150360449 | 5.152106220685  |

# EQ'-CO<sub>2</sub> 48

|    |                 |                 |                 |
|----|-----------------|-----------------|-----------------|
| C  | 1.032217631952  | 2.582548230132  | -4.254675791085 |
| C  | 4.305281064474  | 2.063672382831  | -0.203143587144 |
| C  | 3.675732167348  | 0.789227483938  | 0.920290585367  |
| C  | 4.785254941303  | 2.582621397647  | -4.254734975018 |
| C  | 8.058295123735  | 2.063656655924  | -0.203146569081 |
| C  | 7.428739387850  | 0.789181715239  | 0.920303412296  |
| O  | 3.071904217811  | 1.508252914246  | -0.044759207362 |
| O  | -0.828100116374 | -1.990994064159 | 1.083197078611  |
| O  | 1.167504303799  | 1.275144165917  | -1.114483568929 |
| O  | -1.050365167360 | -3.045388450648 | 3.000402596115  |
| O  | 2.702603148000  | -3.045365245783 | 3.000452697898  |
| O  | -5.105689514396 | -1.471159864830 | -3.083694090200 |
| O  | -2.953733944971 | -0.780694393324 | -1.744586569866 |
| O  | -1.352730415378 | -1.471304620784 | -3.083560648698 |
| O  | 0.799310448520  | -0.780751808667 | -1.744600982273 |
| O  | 6.824915152283  | 1.508258530617  | -0.044732097058 |
| O  | 2.924905108236  | -1.990927071444 | 1.083201318684  |
| O  | 4.920563090991  | 1.275224678438  | -1.114480398067 |
| TV | 7.506015845418  | -0.000000000000 | 0.000000000000  |
| TV | 1.792256269955  | 3.771058207951  | 0.000000000001  |
| TV | 0.183221697611  | -2.587729284817 | 3.572558312849  |

# EQ'-CO<sub>2</sub> 49

|   |                 |                 |                 |
|---|-----------------|-----------------|-----------------|
| C | -2.315120814774 | 0.631293978551  | 0.298375918418  |
| C | 1.265665596032  | 3.886083041666  | -0.683815831050 |
| C | -0.415858604953 | 1.735363912823  | -0.449655949290 |
| C | -3.136252195062 | -0.501073615315 | 2.200503578905  |
| C | 1.471621048344  | 1.803377690835  | 1.368666002537  |
| C | -0.762639278047 | -0.605047289726 | 1.790691140588  |
| O | 1.641084836772  | 7.402731044041  | -0.303456315089 |
| O | -0.002258658138 | -0.617474142060 | 0.889728466908  |
| O | -2.441653873134 | 1.718781030675  | 1.031877299356  |

|    |                 |                 |                 |
|----|-----------------|-----------------|-----------------|
| O  | -3.424077726437 | -4.008740557005 | -0.332809853770 |
| O  | -3.773965623040 | -6.197681069655 | 2.136034576749  |
| O  | 0.170682616294  | 1.703897809528  | 0.755858951619  |
| O  | -1.239979937470 | 0.602683135216  | -0.459937594338 |
| O  | -0.941745002409 | 0.620619725988  | 2.471239699934  |
| O  | -2.250165952716 | -0.518191815797 | 1.143713225685  |
| O  | 1.310242479255  | 5.150478901990  | 2.125712724202  |
| O  | -1.010254672504 | -1.714646532795 | 2.529169515884  |
| O  | -2.577052576936 | -0.493037929384 | 3.451430233876  |
| TV | 5.271150254353  | -0.000000000000 | 0.000000000001  |
| TV | -0.078534215546 | 4.536012124259  | -0.000000000000 |
| TV | -1.337215832983 | -3.321089417081 | 4.097986491010  |

# EQ'-CO<sub>2</sub> 50

|    |                 |                 |                |
|----|-----------------|-----------------|----------------|
| C  | -1.394476733623 | -0.140022125191 | 0.556947884723 |
| C  | 0.659307774378  | -1.073264069897 | 1.879070537066 |
| C  | -3.483710429563 | -3.415597149747 | 1.730499179532 |
| C  | -1.472743139159 | -4.307726482052 | 3.112404620431 |
| C  | -5.572310899603 | -6.718536422434 | 2.866178417065 |
| C  | -3.569634995021 | -7.581726218741 | 4.289815725830 |
| O  | -1.672182000172 | 1.170395355090  | 0.874187371365 |
| O  | -3.847438898378 | -2.116622458040 | 2.020994061188 |
| O  | -0.342449695156 | -0.668882189804 | 1.132761979957 |
| O  | -2.545545027322 | -3.743179685873 | 2.596935090515 |
| O  | -4.447430555054 | -4.341948534135 | 1.690346410418 |
| O  | -1.190940797745 | -5.618556680050 | 2.797202491277 |
| O  | -2.503737678519 | -0.853832765111 | 0.803213755986 |
| O  | -5.886654362125 | -5.410887194027 | 3.174651420329 |
| O  | 0.971854616084  | -2.382907928593 | 1.570237859957 |
| O  | -4.517195026812 | -7.237440490200 | 3.451193129915 |
| O  | -6.578385032298 | -7.591577929931 | 2.918973967154 |
| O  | -3.207727212283 | -8.881383768460 | 3.998508148432 |
| TV | 6.890162324636  | 0.000000000002  | 0.000000000001 |
| TV | -0.700372891353 | 4.032852108285  | 0.000000000002 |
| TV | -6.313487480608 | -9.812744787875 | 3.544016516637 |

# EQ'-CO<sub>2</sub> 51

|    |                 |                 |                 |
|----|-----------------|-----------------|-----------------|
| C  | -2.611937771585 | 1.885848790389  | -0.442044781496 |
| C  | 0.945869142315  | 1.127996616355  | -0.402433617286 |
| C  | -0.427149466249 | 2.354358043201  | -0.707251320129 |
| C  | -3.610079950525 | -0.401014013628 | 2.181196994633  |
| C  | -0.052277059791 | -1.158803928751 | 2.220787018330  |
| C  | -1.425294377250 | 0.067621102135  | 1.915933007325  |
| O  | 0.972830613693  | 4.424513581771  | 0.020042906247  |
| O  | -0.327886937071 | -0.294044936177 | 1.172929731102  |
| O  | -1.832374746889 | 1.278203610413  | 1.719413770239  |
| O  | -1.877421645644 | -0.579072877132 | -0.491781665907 |
| O  | -2.875557401621 | -2.865945708812 | 2.131366192411  |
| O  | 0.156391643843  | 1.877263766456  | 0.454634775433  |
| O  | -1.464994609626 | 1.499254827063  | -0.905465598392 |
| O  | -0.841799123651 | -0.409453708185 | 3.077836988475  |
| O  | -2.463113716672 | -0.787605835064 | 1.717848986010  |
| O  | -0.025343030373 | 2.137661725967  | 2.643287982233  |
| O  | -1.326285540985 | -2.580792323382 | 3.796095892225  |
| O  | -2.830663581611 | -1.008501391322 | 4.342649735023  |
| TV | 5.528370318375  | 0.000000000000  | -0.000000000000 |
| TV | -1.187570580844 | 3.543666676108  | 0.000000000000  |

|                          |                  |                 |                 |
|--------------------------|------------------|-----------------|-----------------|
| TV                       | -1.996506418076  | -4.573464814008 | 5.246433094172  |
| # EQ'-CO <sub>2</sub> 52 |                  |                 |                 |
| C                        | -1.660908097885  | 2.040086304475  | 0.476116735597  |
| C                        | 4.355474610456   | 3.042452688840  | -1.425718276601 |
| C                        | -1.393372286192  | 0.074525909288  | -0.639980460665 |
| C                        | -2.632091473613  | 2.968829174731  | 3.388082147823  |
| C                        | 3.384301644701   | 3.971195478540  | 1.486236692991  |
| C                        | -2.364539428383  | 1.003292172749  | 2.271976022685  |
| O                        | 5.755634195806   | 6.237083910543  | 0.818358879713  |
| O                        | -3.802871243104  | -0.623391476754 | -0.167896204943 |
| O                        | -1.206018829772  | 1.637760852748  | 1.716672926741  |
| O                        | -10.127808079734 | -4.234434959923 | -1.088409559367 |
| O                        | -11.098972594297 | -3.305673753851 | 1.823555081918  |
| O                        | 4.086451429831   | 4.644329718659  | 0.846388007340  |
| O                        | -2.215875062526  | 1.006900764326  | -0.155315989371 |
| O                        | 3.115287680668   | 5.573100053043  | 3.758367497603  |
| O                        | -3.187063753334  | 1.935653265517  | 2.756641492866  |
| O                        | 4.784455721911   | 7.165844699651  | 3.730337499275  |
| O                        | -4.774052083106  | 0.305354595992  | 2.744063650966  |
| O                        | -2.177187945602  | 2.566511061787  | 4.628639631535  |
| TV                       | 5.272484816507   | -0.000000000002 | -0.000000000004 |
| TV                       | 3.123272927741   | 3.288823999515  | 0.000000000002  |
| TV                       | -1.942327696467  | 1.857495309551  | 5.823924624734  |

|                          |                 |                 |                 |
|--------------------------|-----------------|-----------------|-----------------|
| # EQ'-CO <sub>2</sub> 53 |                 |                 |                 |
| C                        | 0.231711237919  | -1.285786596942 | 0.917263676147  |
| C                        | -1.364097199536 | -1.299272202292 | 1.925157632678  |
| C                        | 4.301064855128  | -1.284779303360 | 0.931157554386  |
| C                        | 2.685624054037  | -1.296199808059 | 1.904941892250  |
| C                        | 8.354778505161  | -1.291982441474 | 0.930259746781  |
| C                        | 6.754130954896  | -1.302600599784 | 1.927348830930  |
| O                        | -1.778162520532 | 1.975118352277  | -0.383671634301 |
| O                        | 2.287198791004  | 1.981943741859  | -0.366602224378 |
| O                        | -2.518696751142 | 0.979397282892  | 1.440690145855  |
| O                        | 1.511690613671  | 0.921248230884  | 1.435638362638  |
| O                        | 3.502654814754  | -2.295378480810 | 1.413430554915  |
| O                        | 5.515210945371  | -1.319214674642 | 1.494551640805  |
| O                        | -0.565425506268 | -2.297453019877 | 1.409246474403  |
| O                        | 6.337422978728  | 1.984939464952  | -0.383969741280 |
| O                        | 1.462126334206  | -1.296169807910 | 1.385066064061  |
| O                        | 5.485225523126  | 0.951348848994  | 1.404617147628  |
| O                        | 7.560152948236  | -2.304581796740 | 1.425694366600  |
| O                        | 9.575478185075  | -1.273769158422 | 1.469998248364  |
| TV                       | 12.175590829803 | 0.000000000000  | -0.000000000000 |
| TV                       | -4.073297590846 | 4.495814381355  | -0.000000000002 |
| TV                       | -2.853615130609 | -2.268591026529 | 1.798946133158  |

|                          |                 |                 |                |
|--------------------------|-----------------|-----------------|----------------|
| # EQ'-CO <sub>2</sub> 54 |                 |                 |                |
| C                        | 0.234366968311  | -1.648889895724 | 1.123015986040 |
| C                        | -0.999661704566 | -0.303854674229 | 1.121638337528 |
| C                        | -1.716455817968 | -3.019365336562 | 3.275885784700 |
| C                        | -2.950490466806 | -1.674338640787 | 3.274500675705 |
| C                        | -3.667312196487 | -4.389860105891 | 5.428749540560 |
| C                        | -4.901342853095 | -3.044827462585 | 5.427372920803 |
| O                        | -1.547051291061 | 0.432836128056  | 0.117941649239 |
| O                        | -3.497885014482 | -0.937641420188 | 2.270808583657 |

|    |                 |                 |                 |
|----|-----------------|-----------------|-----------------|
| O  | -1.683346623142 | 0.307442281710  | 2.126848436585  |
| O  | -3.634188160911 | -1.063050658576 | 4.279713059772  |
| O  | -3.077592264568 | -3.026708178016 | 3.277301856136  |
| O  | -1.588601282365 | -1.665831367068 | 3.271713962169  |
| O  | -1.126776531715 | -1.656222412819 | 1.124443734363  |
| O  | -5.448730375265 | -2.308138526344 | 4.423674454060  |
| O  | 0.362214876215  | -0.295364272185 | 1.118851495692  |
| O  | -5.585052459927 | -2.433551543393 | 6.432579227638  |
| O  | -5.028449578854 | -4.397192373734 | 5.430178266395  |
| O  | -3.539456713084 | -3.036328409061 | 5.424582275939  |
| TV | 5.884909852936  | 0.000000000001  | 0.000000000000  |
| TV | -2.463348908430 | 2.693807453056  | -0.000000000000 |
| TV | -5.852558242405 | -4.111468351996 | 6.458600236263  |

# EQ'-CO<sub>2</sub> 55

|    |                 |                 |                 |
|----|-----------------|-----------------|-----------------|
| C  | -1.687436393190 | 1.039874730533  | -0.237260433929 |
| C  | 0.313031775132  | 3.872677607167  | 0.022249249838  |
| C  | 0.417829601542  | 0.248517938122  | -0.853600149162 |
| C  | -3.308145779738 | -1.539164930001 | 1.571100322188  |
| C  | -1.307675840571 | 1.293658929376  | 1.830614832172  |
| C  | -1.202883961768 | -2.330511216058 | 0.954752746959  |
| O  | -4.590663270214 | 11.834239142604 | 0.388274453810  |
| O  | 2.957465743427  | -7.275197823452 | 2.293468270739  |
| O  | -0.966823019568 | 1.737860840314  | 0.587920092320  |
| O  | -2.599256746259 | 0.209056430160  | 0.380290376821  |
| O  | -4.219974668170 | -2.369987480081 | 2.188645774365  |
| O  | 1.029543505823  | 1.440896691258  | -1.169351338160 |
| O  | -0.868992314092 | 0.358358039112  | -1.090656848109 |
| O  | -0.591167235800 | -1.138135816130 | 0.639010950081  |
| O  | -2.489704235905 | -2.220666787015 | 0.717691343705  |
| O  | -6.211368748976 | 9.255211723613  | 2.196660676568  |
| O  | 1.336748502741  | -9.854226859815 | 4.101865972134  |
| O  | -2.587526109767 | -0.841192290074 | 2.396287432199  |
| TV | 3.678407693066  | -0.000000000006 | 0.000000000004  |
| TV | -3.684589013016 | 7.668640628048  | 0.000000000020  |
| TV | -3.241434648318 | -5.158045627145 | 3.616734514587  |

# EQ'-CO<sub>2</sub> 56

|    |                 |                 |                 |
|----|-----------------|-----------------|-----------------|
| C  | -3.582857048447 | 1.949823097021  | 2.080435415021  |
| C  | 0.827349023872  | 0.458655078458  | -2.779213262051 |
| C  | -1.002418526111 | 3.201310543569  | -0.970157482019 |
| C  | -4.720198458970 | 5.481701858814  | 2.080421185716  |
| C  | -0.310054682290 | 3.990549215046  | -2.779200951273 |
| C  | -2.139756432315 | 6.733183833112  | -0.970165134203 |
| O  | 0.258402608185  | 3.324394801291  | -0.548597026780 |
| O  | 0.593016365815  | -0.621312786777 | 1.720394687110  |
| O  | -2.411162956209 | 2.261924279971  | 2.554323825145  |
| O  | 0.167429705895  | -0.682554166834 | -2.281759128721 |
| O  | -0.969966851531 | 2.849335014783  | -2.281751361439 |
| O  | 0.378850039879  | 1.423896735368  | 0.778835080535  |
| O  | -1.680123269721 | 2.434990748592  | -0.117020856308 |
| O  | -0.758457348873 | 4.955782588375  | 0.778842054155  |
| O  | -2.817466731460 | 5.966879300495  | -0.117019165301 |
| O  | -0.878935994379 | 6.856277001039  | -0.548606236342 |
| O  | -0.544356909312 | 2.910568244207  | 1.720402724319  |
| O  | -3.548505313974 | 5.793788759219  | 2.554311290147  |
| TV | 3.947841722016  | -0.000000000000 | -0.000000000000 |



|    |                 |                 |                 |
|----|-----------------|-----------------|-----------------|
| TV | -2.274731353877 | 7.063755815375  | -0.000000000000 |
| TV | -0.605073854809 | -2.087486537805 | 3.585085752461  |

# EQ'-CO<sub>2</sub> 57

|    |                 |                 |                 |
|----|-----------------|-----------------|-----------------|
| C  | -2.513342963072 | 1.441076094472  | -0.288440844357 |
| C  | 0.570231189036  | 3.432693973951  | -1.129384062462 |
| C  | -0.439715154001 | 1.976394214850  | -0.654323024136 |
| C  | -3.526394002210 | -0.743302481675 | 2.359017084258  |
| C  | -0.442917675264 | 1.248437113362  | 1.517735803015  |
| C  | -1.452961224128 | -0.207635195520 | 1.993134808950  |
| O  | 0.966462646943  | 4.007779761275  | 0.034927728952  |
| O  | -0.301055776467 | -0.123578502279 | 1.262837537789  |
| O  | -1.808563911103 | 1.113499748955  | 1.681228646513  |
| O  | -1.683546591686 | -1.005150827022 | -0.264999447550 |
| O  | -2.696433625647 | -3.189474315530 | 2.382621711047  |
| O  | 0.117121169072  | 1.934585513711  | 0.579479736017  |
| O  | -1.350758644298 | 1.056026661296  | -0.802728951627 |
| O  | -0.896677485518 | -0.248513480390 | 3.227228507594  |
| O  | -2.363745003938 | -1.128420950876 | 1.844964150209  |
| O  | -0.046829732496 | 1.823574121686  | 2.682034832042  |
| O  | -1.315061995606 | -2.306397207058 | 3.909948875061  |
| O  | -2.822445707900 | -1.069454769756 | 4.329095626562  |
| TV | 5.440107406521  | -0.000000000000 | 0.000000000000  |
| TV | -1.146025788892 | 3.568554939461  | 0.000000000000  |
| TV | -2.027010313132 | -4.367190940619 | 5.294862402731  |

# EQ'-CO<sub>2</sub> 58

|    |                 |                 |                 |
|----|-----------------|-----------------|-----------------|
| C  | -4.025094967428 | -0.387306178327 | 0.873266255590  |
| C  | 2.671339314445  | 3.139420734934  | -1.276640723855 |
| C  | 0.537694556132  | 2.859166335724  | -1.098094711273 |
| C  | -4.971816539764 | 2.724667544262  | 0.873256266736  |
| C  | 1.724666424548  | 6.251442106110  | -1.276646785942 |
| C  | -0.408967035419 | 5.971234196702  | -1.098095504616 |
| O  | 0.301662640833  | 3.378801760537  | 0.095210786644  |
| O  | -0.638221566506 | 1.367955117356  | 0.626257464592  |
| O  | -3.740339973601 | 0.672841983038  | 1.290939051133  |
| O  | -3.612496115622 | -0.889934897575 | -0.274514188897 |
| O  | -4.559193606874 | 2.222036797376  | -0.274526207930 |
| O  | 1.333740931647  | 1.879311072987  | 1.571826265954  |
| O  | 0.365625332189  | 1.733609289012  | -1.370968004451 |
| O  | 0.387104263768  | 4.991321236164  | 1.571839039340  |
| O  | -0.581147723989 | 4.845739611290  | -1.371077202782 |
| O  | -0.644987087164 | 6.490778087058  | 0.095239485512  |
| O  | -1.584867434954 | 4.479997859480  | 0.626252173135  |
| O  | -4.687082363978 | 3.784805956027  | 1.290952198795  |
| TV | 7.030073962727  | -0.000000000000 | -0.000000000000 |
| TV | -1.893363555814 | 6.223995843543  | 0.000000000000  |
| TV | -2.105292833945 | -2.243734800798 | 2.312454331312  |

# EQ'-CO<sub>2</sub> 59

|   |                 |                 |                |
|---|-----------------|-----------------|----------------|
| C | -2.023018580013 | 3.046738678867  | 0.711808222857 |
| C | -1.967937600336 | -2.280648481057 | 2.390252328067 |
| C | 1.704955393957  | -1.636375571510 | 1.599406041226 |
| C | -4.662551877851 | 0.369734923156  | 2.386563579558 |
| C | -3.953383222156 | -3.494992560801 | 3.827352299262 |
| C | -0.262390407805 | -2.914962964050 | 3.492330490841 |
| O | 3.903119725807  | -0.106139363372 | 0.726225019733 |

|    |                 |                 |                 |
|----|-----------------|-----------------|-----------------|
| O  | 0.676741024682  | -0.886301613672 | 2.069066218913  |
| O  | -2.174552369923 | 1.933322835100  | 1.300594808928  |
| O  | 2.123539176724  | -1.321047873914 | 0.307002931948  |
| O  | -0.311066972947 | -3.910699042331 | 2.827927039982  |
| O  | -3.364770340416 | 0.555276334187  | 2.224575597176  |
| O  | -0.227357558607 | 0.981651486099  | -0.550260410676 |
| O  | -5.506407579288 | -0.496723562249 | 4.351228370346  |
| O  | -2.986709684978 | -1.475707000257 | 2.547442592548  |
| O  | 1.277418378739  | -2.893388328024 | 1.551704155451  |
| O  | -1.209762258036 | -2.003986083433 | 3.473006371119  |
| O  | -3.758239813308 | 0.765137166742  | 4.512801352164  |
| TV | 5.661085106306  | 0.000000000001  | 0.000000000001  |
| TV | -0.995345063489 | 4.095889202538  | 0.000000000000  |
| TV | -4.491631934035 | -3.383155373127 | 4.418004205419  |

# EQ'-CO<sub>2</sub> 60

|    |                 |                 |                 |
|----|-----------------|-----------------|-----------------|
| C  | -1.624533187399 | 2.530439772548  | 1.258745060771  |
| C  | 0.722246257285  | 2.643354392709  | -1.917096222127 |
| C  | -0.193392804168 | 2.036529125846  | -0.369995716659 |
| C  | -1.148767304076 | 6.293064124455  | 1.258718495483  |
| C  | 1.198042012361  | 6.405969339780  | -1.917094661048 |
| C  | 0.282380289020  | 5.799150341885  | -0.369996479639 |
| O  | 0.452117238694  | 3.230026041739  | -0.678924476007 |
| O  | -0.140282091065 | -0.474470495276 | 1.573601616070  |
| O  | -1.652018216925 | 1.877906659651  | 2.226488663606  |
| O  | -2.742451161969 | -1.630975154256 | -2.082058547472 |
| O  | -2.266682997035 | 2.131644270225  | -2.082047250211 |
| O  | 0.701352305476  | 1.406574317567  | 0.360679200457  |
| O  | -1.400170057074 | 2.001453471622  | 0.065830167980  |
| O  | 1.177120995240  | 5.169214209891  | 0.360698064469  |
| O  | -0.924422644784 | 5.764111695103  | 0.065780190997  |
| O  | 0.927902681636  | 6.992645402359  | -0.678918844054 |
| O  | 0.335518613025  | 3.288135882731  | 1.573602068074  |
| O  | -1.176195825387 | 5.640525930796  | 2.226464327011  |
| TV | 4.209265447861  | 0.000000000000  | -0.000000000000 |
| TV | 0.951564426538  | 7.525237004994  | 0.000000000000  |
| TV | 0.011539907650  | -2.077844062808 | 3.260951039952  |

# EQ'-CO<sub>2</sub> 61

|   |                 |                 |                 |
|---|-----------------|-----------------|-----------------|
| C | -2.071826529931 | 0.843294351770  | 0.607636446785  |
| C | 2.346505871785  | 3.305151820228  | -1.837532634902 |
| C | -0.412307024350 | 2.179098076500  | -0.502056838806 |
| C | -2.912678929044 | 4.399431176227  | 0.607620711336  |
| C | 1.505652711449  | 6.861351844183  | -1.837560382465 |
| C | -1.253149029282 | 5.735276714736  | -0.502044075553 |
| O | 1.132380297782  | 4.318132754311  | 0.156222179629  |
| O | -1.434871139909 | -0.365873382314 | 0.916441588492  |
| O | -2.094463465358 | 1.225429485600  | 1.928108696979  |
| O | -2.525478324713 | -0.912253324508 | -0.971376640663 |
| O | -3.366276118136 | 2.643919749952  | -0.971348910927 |
| O | 0.338298563577  | 2.146179758208  | 0.541678208295  |
| O | -1.513314517206 | 1.450975640228  | -0.401881743681 |
| O | -0.502477269909 | 5.702443630626  | 0.541637740908  |
| O | -2.354164216412 | 5.007167010973  | -0.401853004080 |
| O | 0.291622197266  | 7.874364155985  | 0.156247549127  |
| O | -2.275748486908 | 3.190253873784  | 0.916455781586  |
| O | -2.935268600719 | 4.781614118462  | 1.928080985628  |

|    |                 |                 |                |
|----|-----------------|-----------------|----------------|
| TV | 5.295779889897  | -0.000000000000 | 0.000000000000 |
| TV | -1.681623638911 | 7.112352971851  | 0.000000000000 |
| TV | -1.400222960524 | -2.282020058305 | 2.732302143874 |

# EQ'-CO<sub>2</sub> 62

|    |                 |                 |                 |
|----|-----------------|-----------------|-----------------|
| C  | -2.160682272210 | 0.745281579017  | 0.623907131133  |
| C  | 2.489826762691  | 3.355895373985  | -1.894559564579 |
| C  | -0.429383293022 | 2.177945647712  | -0.424726932324 |
| C  | -3.056936225224 | 4.352860110276  | 0.623891472786  |
| C  | 1.593566858568  | 6.963464086865  | -1.894558457442 |
| C  | -1.325630996456 | 5.785525477726  | -0.424746182119 |
| O  | 1.066615112163  | 4.330741556449  | 0.028267678912  |
| O  | -1.584284220993 | -0.477687945839 | 0.959943694768  |
| O  | -2.357615338754 | 1.096265764665  | 1.943149622572  |
| O  | -2.400855650154 | -0.933157537946 | -1.067869252831 |
| O  | -3.297134006651 | 2.674401263813  | -1.067882759845 |
| O  | 0.457231015786  | 2.180839093379  | 0.507653813458  |
| O  | -1.478876196924 | 1.419050976466  | -0.238494029095 |
| O  | -0.439041091815 | 5.788398322587  | 0.507654038710  |
| O  | -2.375140276499 | 5.026642674659  | -0.238500879740 |
| O  | 0.170351799023  | 7.938300126903  | 0.028274871518  |
| O  | -2.480538224671 | 3.129886622804  | 0.959933442474  |
| O  | -3.253863957267 | 4.703835400437  | 1.943137949336  |
| TV | 5.319463527469  | 0.000000000000  | 0.000000000000  |
| TV | -1.792524628040 | 7.215139078206  | -0.000000000000 |
| TV | -1.547707185887 | -2.372332048604 | 2.691136612146  |

# EQ'-CO<sub>2</sub> 63

|    |                 |                 |                |
|----|-----------------|-----------------|----------------|
| C  | 0.242781409446  | -2.044976342703 | 1.072441632101 |
| C  | -1.814278516260 | -0.460606423576 | 1.459854669159 |
| C  | -1.798273965178 | 1.375152157879  | 1.072450809592 |
| C  | -3.855333147268 | 2.959475885631  | 1.459889396974 |
| C  | -3.839314727929 | 4.795229790850  | 1.072474709063 |
| C  | -5.896329223269 | 6.379611497857  | 1.459871335037 |
| O  | -2.173294210277 | 0.271642646368  | 0.341316883899 |
| O  | -4.214307955810 | 3.691706566380  | 0.341335713039 |
| O  | -1.446864922063 | 0.652857779115  | 2.186309468583 |
| O  | -3.487924186651 | 4.072977703850  | 2.186335558763 |
| O  | -2.830552960867 | 2.170782281648  | 1.260103428682 |
| O  | -0.785037521096 | 2.036357326550  | 0.571731011946 |
| O  | -0.789534631076 | -1.249348352605 | 1.260077465758 |
| O  | -6.255345597497 | 7.111825078031  | 0.341330045595 |
| O  | 1.255977707114  | -1.383769481970 | 0.571765004007 |
| O  | -5.528930301847 | 7.493077156603  | 2.186316540664 |
| O  | -4.871568105527 | 5.590915478334  | 1.260046181440 |
| O  | -2.826086300889 | 5.456477006674  | 0.571781419443 |
| TV | 6.967491862918  | 0.000000000001  | 0.000000000000 |
| TV | -6.123083236697 | 10.260347852902 | 0.000000000000 |
| TV | -2.059790609926 | -3.141686941414 | 1.373857801679 |

# EQ'-CO<sub>2</sub> 64

|   |                 |                |                 |
|---|-----------------|----------------|-----------------|
| C | -2.261324185490 | 0.303786736432 | 0.630515055315  |
| C | 1.202885312569  | 3.343607371064 | 0.075570795429  |
| C | -0.672419424127 | 0.819016485072 | -0.156421997808 |
| C | 1.441100773558  | 0.186167645704 | 0.543272067056  |
| C | 4.902818027897  | 3.355623897008 | 0.086186698921  |
| C | 3.029972488132  | 0.792127316885 | -0.176380838224 |

|    |                 |                 |                 |
|----|-----------------|-----------------|-----------------|
| O  | 3.993006156629  | 9.024265055426  | -0.428665926413 |
| O  | -1.541367533335 | -2.388622142778 | 0.637799015172  |
| O  | -1.551408341532 | 1.500138263818  | 0.676589411023  |
| O  | -3.537609288766 | 0.271925142708  | 0.749040406053  |
| O  | 0.164633777427  | 0.077924711066  | 0.604257677557  |
| O  | 0.047000825088  | 1.498820815770  | -0.972993773232 |
| O  | -1.646581971404 | -0.088552828658 | -0.551699269984 |
| O  | 3.749402097116  | 1.381118643663  | -1.060754960715 |
| O  | 2.152712557198  | -0.202495771148 | -0.588450355982 |
| O  | 7.693505594143  | 9.221954906745  | -0.280743737743 |
| O  | 2.159208252732  | -2.553436571803 | 0.519943289625  |
| O  | 2.054674271679  | 1.431572288330  | 0.578198925681  |
| TV | 7.405017901001  | 0.000000000000  | 0.000000000000  |
| TV | 1.782299510244  | 5.454318878215  | 0.000000000001  |
| TV | -1.780770955485 | -1.934578991799 | 2.604153474663  |

# EQ'-CO<sub>2</sub> 65

|    |                 |                 |                 |
|----|-----------------|-----------------|-----------------|
| C  | 2.068834896773  | -2.410368841797 | 0.817079202564  |
| C  | -1.322552362551 | -0.163353912805 | 1.416555573870  |
| C  | 1.564943950004  | -3.638817787982 | 2.542275565513  |
| C  | -1.826457382898 | -1.391765715266 | 3.141785600071  |
| C  | 1.061036486053  | -4.867244197002 | 4.267476738412  |
| C  | -2.330371375995 | -2.620231193068 | 4.866931984238  |
| O  | -1.410170843758 | 1.057505154073  | 0.887494126548  |
| O  | -1.914089884310 | -0.170922866730 | 2.612704529340  |
| O  | 1.026206166586  | 0.691647934925  | 1.345465715780  |
| O  | 0.522280807178  | -0.536802574385 | 3.070648682036  |
| O  | -3.721457656071 | -2.758734771963 | 2.987264475873  |
| O  | -1.193971347442 | -2.276376605990 | 2.704439007107  |
| O  | -3.217523935064 | -1.530284594636 | 1.262106600539  |
| O  | -2.418018765252 | -1.399352793481 | 4.337924925475  |
| O  | -0.690069009500 | -1.047974955937 | 0.979211528652  |
| O  | 0.018327755793  | -1.765224580135 | 4.795839216673  |
| O  | -4.225357660676 | -3.987176931927 | 4.712485248969  |
| O  | -1.697890567378 | -3.504847042186 | 4.429578057329  |
| TV | 4.652644111447  | -0.000000000000 | 0.000000000000  |
| TV | -1.129815403306 | 4.322849180245  | -0.000000000000 |
| TV | -1.511768970671 | -3.685310892926 | 5.175574479857  |

# EQ'-CO<sub>2</sub> 66

|   |                 |                 |                 |
|---|-----------------|-----------------|-----------------|
| C | -1.679572358017 | 1.865101446023  | 0.713198289283  |
| C | 0.648310095357  | 3.351585337233  | -1.719699117752 |
| C | -0.294609040161 | 1.644355198652  | -0.895484276822 |
| C | -3.264655800591 | 5.430749812837  | 0.713179881041  |
| C | -0.936728625397 | 6.917137019459  | -1.719781174474 |
| C | -1.879654145079 | 5.209919562428  | -0.895530659916 |
| O | -1.401081883663 | 4.215049301654  | -0.445623530220 |
| O | 0.574547622016  | -0.760049968229 | 1.341757276977  |
| O | -1.309067575629 | 0.575629547870  | 1.270690487743  |
| O | -1.987114977794 | -0.654353629786 | -0.590223246824 |
| O | -3.572229614448 | 2.911196435996  | -0.590141994640 |
| O | 0.987605108279  | 1.739339065281  | 1.314458964782  |
| O | -1.627862859640 | 1.921369478954  | -0.551748493696 |
| O | -0.597481143098 | 5.304882901773  | 1.314393924040  |
| O | -3.212861362996 | 5.487052025857  | -0.551755016454 |
| O | -2.986153548439 | 7.780630363233  | -0.445572686592 |
| O | -1.010537706338 | 2.805493339584  | 1.341716454578  |

|    |                 |                 |                |
|----|-----------------|-----------------|----------------|
| O  | -2.894096142231 | 4.141249228759  | 1.270640576611 |
| TV | 3.943744642828  | 0.000000000000  | 0.000000000000 |
| TV | -3.170151529310 | 7.131122400684  | 0.000000000000 |
| TV | 0.884002094747  | -2.616545515746 | 3.648713929925 |

# EQ'-CO<sub>2</sub> 67

|    |                 |                 |                 |
|----|-----------------|-----------------|-----------------|
| C  | -2.002857443211 | 1.216279400678  | -0.285576818632 |
| C  | 1.655033292350  | 1.690618071184  | -0.444025265921 |
| C  | -0.249807807357 | 2.340498024619  | -0.488129074491 |
| C  | -2.699062589921 | 4.972017276452  | -0.285528005607 |
| C  | 0.958824598026  | 5.446349130692  | -0.443998003388 |
| C  | -0.945978386953 | 6.096239887297  | -0.488117093368 |
| O  | 1.627360734700  | 4.286353778982  | -0.699107940895 |
| O  | -1.661664371662 | 0.677052170100  | 0.932166805671  |
| O  | -3.310868778697 | 1.861701454971  | 2.177356204359  |
| O  | -2.021413062474 | -1.375419997495 | -0.014910144626 |
| O  | -2.717483847045 | 2.380337865922  | -0.014975945164 |
| O  | 0.616988587908  | 1.690239947875  | 0.365734086364  |
| O  | -1.037278842895 | 1.398715152979  | -1.106312931554 |
| O  | -0.079202868099 | 5.445996815249  | 0.365776005207  |
| O  | -1.733467773984 | 5.154481830049  | -1.106270417252 |
| O  | 0.931255925772  | 8.042090449698  | -0.699135912344 |
| O  | -2.357836043579 | 4.432747330876  | 0.932170260121  |
| O  | -4.007059857240 | 5.617435411819  | 2.177359849222  |
| TV | 5.447629910860  | 0.000000000000  | 0.000000000000  |
| TV | -1.392287845070 | 7.511479410705  | 0.000000000000  |
| TV | -2.662149483229 | -1.565798499674 | 2.477586890948  |

# EQ'-CO<sub>2</sub> 68

|    |                 |                 |                 |
|----|-----------------|-----------------|-----------------|
| C  | -2.162059016613 | 0.756301738396  | 0.108020726762  |
| C  | 1.102071103937  | 2.831402492295  | -0.436488201291 |
| C  | -0.605824348663 | 2.324619951776  | -0.715920030860 |
| C  | -3.508018921086 | 4.194354765782  | 0.108021781326  |
| C  | -0.243887054239 | 6.269473587935  | -0.436506275513 |
| C  | -1.951775056610 | 5.762649022839  | -0.715938573169 |
| O  | 0.909390714014  | 4.156619444107  | -0.068609216391 |
| O  | -0.255611180804 | -0.255286301457 | 0.966084602826  |
| O  | -1.877830704660 | 0.961521788638  | 1.407614853751  |
| O  | -2.007226283783 | -0.561203169901 | -0.363651121793 |
| O  | -3.353157416782 | 2.876831804437  | -0.363615531872 |
| O  | 0.193535517009  | 2.156121353923  | 0.363163524512  |
| O  | -1.589766113001 | 1.497011894617  | -0.822934243031 |
| O  | -1.152407992184 | 5.594158551076  | 0.363135255620  |
| O  | -2.935739868894 | 4.935065313471  | -0.822939462384 |
| O  | -0.436558753696 | 7.594737382822  | -0.068632817171 |
| O  | -1.601544039681 | 3.182729267769  | 0.966076733106  |
| O  | -3.223707999670 | 4.399592799374  | 1.407593653273  |
| TV | 5.776441103099  | 0.000000000000  | 0.000000000000  |
| TV | -2.691903611951 | 6.876084433088  | -0.000000000000 |
| TV | -0.789335706902 | -2.622674059498 | 2.535450667823  |

# EQ'-CO<sub>2</sub> 69

|   |                 |                 |                 |
|---|-----------------|-----------------|-----------------|
| C | -2.338738602788 | 0.233577615354  | 0.888940909580  |
| C | 0.170240713434  | 2.810183191207  | 0.422895980391  |
| C | 0.288978460344  | 0.866698539259  | -1.227416997911 |
| C | -4.160597172205 | -2.115345749683 | 3.310875825151  |
| C | -1.651622094597 | 0.461246776074  | 2.844824963304  |

|    |                 |                 |                 |
|----|-----------------|-----------------|-----------------|
| C  | -1.532917488459 | -1.482261418765 | 1.194523416464  |
| O  | 0.887905381239  | 8.195093471163  | 0.374158119656  |
| O  | 0.261233786194  | -3.342480114872 | 1.071140969911  |
| O  | -2.272690960770 | 1.147178451586  | 1.858283102064  |
| O  | -2.963816007704 | 0.592633464776  | -0.151860748919 |
| O  | -4.785686127918 | -1.756273420557 | 2.270075840107  |
| O  | 0.759299886254  | 2.056103051331  | -1.754605163454 |
| O  | -1.007855380532 | 1.370302046414  | -0.997799369377 |
| O  | -1.062622739014 | -0.292857092883 | 0.667317701251  |
| O  | -2.829754613060 | -0.978638046863 | 1.424146803136  |
| O  | -0.933969303626 | 5.846181449266  | 2.796085151454  |
| O  | -1.560647702196 | -5.691412145976 | 3.493056803283  |
| O  | -4.094579350929 | -1.201740423247 | 4.280214410188  |
| TV | 3.911873168270  | -0.000000000000 | -0.000000000000 |
| TV | -0.637120497726 | 5.345765938257  | 0.000000000001  |
| TV | -3.643759062099 | -4.697860924140 | 4.843855550425  |

# EQ'-CO<sub>2</sub> 70

|    |                 |                 |                 |
|----|-----------------|-----------------|-----------------|
| C  | -1.833986092874 | 0.314537425272  | 0.712126934782  |
| C  | 0.872799958383  | 3.894390325531  | -1.482588718930 |
| C  | -0.053820385127 | -0.849110638711 | 0.334434866745  |
| C  | -3.195792148896 | -1.643034715465 | 2.959470801152  |
| C  | -0.489013762604 | 1.936855841127  | 0.764755917426  |
| C  | -1.415609137153 | -2.806714664692 | 2.581785226622  |
| O  | 0.964275839345  | 9.333130827730  | -0.460458816865 |
| O  | -0.248393357919 | -1.945415910747 | 0.733801425467  |
| O  | -1.834161231577 | 1.681786340574  | 0.621825044377  |
| O  | -3.086740769743 | -0.068412235912 | 0.649135238435  |
| O  | -4.448546699818 | -2.025998705207 | 2.896491814952  |
| O  | 0.132271681759  | 1.865727315336  | -0.390724190790 |
| O  | -1.002216966574 | -0.142803601808 | -0.279043319066 |
| O  | -1.229535262728 | -0.091810404550 | 1.856631521239  |
| O  | -2.364008380630 | -2.100376419707 | 1.968315355829  |
| O  | -0.397544234108 | 7.375604043361  | 1.786894119625  |
| O  | -1.610220224917 | -3.903009261976 | 2.981161609766  |
| O  | -3.195959694636 | -0.275784510412 | 2.869174304706  |
| TV | 3.997029861469  | 0.000000000000  | -0.000000000000 |
| TV | -0.451643484857 | 5.663865031931  | 0.000000000000  |
| TV | -2.723620306736 | -3.915097401129 | 4.494715819982  |

# EQ'-CO<sub>2</sub> 71

|   |                 |                 |                 |
|---|-----------------|-----------------|-----------------|
| C | -0.600438648651 | 0.321237184481  | 1.026606014041  |
| C | 4.701173245785  | 1.089032809337  | 2.231577034309  |
| C | -2.382245384201 | 1.216434066552  | -1.246374193492 |
| C | -0.335566438314 | -2.295063258894 | 3.522589187949  |
| C | 4.966032977524  | -1.527256562946 | 4.727568282138  |
| C | -2.117375168661 | -1.399855256045 | 1.249608221038  |
| O | 6.835631614378  | 7.827735645091  | 0.700728870368  |
| O | -2.559806361817 | -1.414348541485 | 0.004143866610  |
| O | -0.785821795369 | 1.156237883614  | 0.051533247601  |
| O | -6.020705329574 | 0.376156533727  | -1.054587255217 |
| O | -5.755835929161 | -2.240126096802 | 1.441372280746  |
| O | -2.064896490184 | 2.486725963080  | -0.988831835186 |
| O | -3.288951034521 | 0.781080536429  | -0.320380180235 |
| O | -1.800028438624 | -0.129564976990 | 1.507158714027  |
| O | -3.024060992896 | -1.835216578359 | 2.175624137081  |
| O | 7.100498918941  | 5.211434122856  | 3.196713635339  |

|    |                 |                 |                 |
|----|-----------------|-----------------|-----------------|
| O  | -2.294921468296 | -4.030635880735 | 2.500133577534  |
| O  | -0.520947321019 | -1.460062006696 | 2.547511948661  |
| TV | 4.711949293895  | -0.000000000001 | 0.000000000000  |
| TV | 3.295445620751  | 4.249333540116  | -0.000000000004 |
| TV | 0.529739965285  | -5.232584241397 | 4.991974256802  |

# EQ'-CO<sub>2</sub> 72

|    |                 |                 |                 |
|----|-----------------|-----------------|-----------------|
| C  | 1.112746732267  | -0.362105257147 | 2.289593270710  |
| C  | -2.014990107354 | -0.924919679248 | -0.496403555512 |
| C  | -0.882882177119 | -0.732998678734 | 0.501012615162  |
| C  | 4.360692038095  | -0.362122518249 | 2.289607265659  |
| C  | 1.232952259230  | -0.924902998448 | -0.496413278702 |
| C  | 2.365067001101  | -0.733002778809 | 0.501007710988  |
| O  | -0.877083811484 | 0.021124053881  | -2.495509953979 |
| O  | -1.477443627253 | -1.880422327176 | -1.269200028205 |
| O  | 0.521098864543  | 0.621337937176  | 1.533664681543  |
| O  | 0.818064222893  | 0.222858463902  | -1.060120650734 |
| O  | 4.066004088610  | 0.222836908948  | -1.060115272592 |
| O  | -0.790791136861 | -1.875018400140 | -3.518012556409 |
| O  | 0.187939014434  | -1.461904103434 | 0.145690277008  |
| O  | 2.457161786312  | -1.875025444770 | -3.518024654209 |
| O  | 3.435895847673  | -1.461920952606 | 0.145707480559  |
| O  | 2.370849994937  | 0.021119480108  | -2.495519368083 |
| O  | 1.770495338394  | -1.880411947686 | -1.269202671250 |
| O  | 3.769012286610  | 0.621318180953  | 1.533733228926  |
| TV | 6.495885754282  | 0.000000000000  | -0.000000000000 |
| TV | 0.670177260056  | 3.678752122597  | -0.000000000000 |
| TV | -0.491595534255 | -1.267252246756 | 4.164730475491  |

# EQ'-CO<sub>2</sub> 73

|    |                 |                 |                 |
|----|-----------------|-----------------|-----------------|
| C  | -3.261910265238 | -0.476803635307 | 0.854577860709  |
| C  | 1.215219167005  | 3.674781078732  | -0.870413644923 |
| C  | -0.283102613047 | 2.608418696907  | -1.600803650227 |
| C  | -4.243926618708 | -2.916293973536 | 3.418532513610  |
| C  | 0.233181249917  | 1.235284245285  | 1.693542599626  |
| C  | -1.265138616449 | 0.168932265347  | 0.963134626090  |
| O  | 0.340976077072  | 3.735863151521  | 0.236870477002  |
| O  | -0.450974105774 | 1.197025292088  | 0.591006001104  |
| O  | -2.453492704761 | 0.490462797347  | 1.383342714441  |
| O  | -2.809220526342 | -0.978941902427 | -0.337039116034 |
| O  | -3.791238278127 | -3.418434190380 | 2.226905174109  |
| O  | 1.232198862385  | 2.098469750905  | 1.751563749077  |
| O  | 0.121973065629  | 1.514174259283  | -1.608459155597 |
| O  | 0.250172506069  | -0.341022113553 | 4.315512650140  |
| O  | -0.860029318548 | -0.925299598256 | 0.955481937495  |
| O  | -0.641061991941 | 1.296340214997  | 2.800833549791  |
| O  | -1.433001839074 | -1.242472107873 | 3.154956373018  |
| O  | -3.435518581397 | -1.949019667101 | 3.947291270997  |
| TV | 5.840770600987  | 0.000000000000  | -0.000000000000 |
| TV | -1.234740733198 | 3.494455234079  | -0.000000000000 |
| TV | -1.964057129054 | -4.878978645683 | 5.127905334713  |

# EQ'-CO<sub>2</sub> 74

|   |                 |                 |                 |
|---|-----------------|-----------------|-----------------|
| C | -3.349550009689 | -0.661023480578 | 0.648299636523  |
| C | 3.083519277720  | 3.471605370065  | -2.012988912331 |
| C | 0.490028821555  | 2.589192285908  | -2.000115586759 |
| C | -4.357320872691 | 2.878778376660  | 0.648276156302  |

|    |                 |                 |                 |
|----|-----------------|-----------------|-----------------|
| C  | 2.075743290851  | 7.011417519170  | -2.012926424173 |
| C  | -0.517712035385 | 6.128926702717  | -2.000092746083 |
| O  | 0.328539170030  | 3.549637010476  | -0.011058707441 |
| O  | -0.904719111511 | 1.200626803565  | 0.031589527731  |
| O  | -2.849800677525 | 0.445863365394  | 1.280069666435  |
| O  | -2.395946096495 | -1.330056605123 | -0.051054733847 |
| O  | -3.403713426522 | 2.209752642232  | -0.051076987711 |
| O  | -1.367726785196 | 2.971407708584  | 3.952791519882  |
| O  | 0.640586408063  | 1.622607591132  | -1.400328958401 |
| O  | -2.375544615304 | 6.511198321220  | 3.952694011064  |
| O  | -0.367205786294 | 5.162364928888  | -1.400237154422 |
| O  | -0.679222832100 | 7.089441618769  | -0.011102413350 |
| O  | -1.912576318172 | 4.740364475089  | 0.031634745999  |
| O  | -3.857570925742 | 3.985617759631  | 1.280103018227  |
| TV | 5.666013348358  | 0.000000000000  | 0.000000000000  |
| TV | -2.015596364791 | 7.079606773834  | 0.000000000000  |
| TV | -1.245702387380 | -2.355329711546 | 2.632717983975  |

# EQ'-CO<sub>2</sub> 75

|    |                 |                 |                |
|----|-----------------|-----------------|----------------|
| C  | -0.930359065926 | -1.381093744517 | 0.547391930104 |
| C  | 0.335449396587  | 0.485732934895  | 1.879197119413 |
| C  | -2.880749382301 | -3.552324291768 | 1.732297254945 |
| C  | -1.630888855811 | -1.749654141090 | 3.132906950997 |
| C  | -4.841318864294 | -5.705421418457 | 2.887530023602 |
| C  | -3.583510356822 | -3.921695095750 | 4.317223821825 |
| O  | -1.967678963436 | 1.112694887945  | 0.849435552374 |
| O  | -4.004668384813 | -1.091240695261 | 2.004677950948 |
| O  | -0.292981973869 | -0.401562552077 | 1.145124340975 |
| O  | -2.250311244105 | -2.781381791146 | 2.597589251015 |
| O  | -4.169449369724 | -3.302086913256 | 1.679963667831 |
| O  | -0.590873667383 | -4.242656815545 | 2.831547257590 |
| O  | -2.224844863591 | -1.383752401854 | 0.798386105669 |
| O  | -5.906009089170 | -3.223122023925 | 3.182238516204 |
| O  | 1.396170461546  | -1.997140883500 | 1.583052514950 |
| O  | -4.206618732490 | -4.709723554310 | 3.471476778659 |
| O  | -6.139820661575 | -5.543123174024 | 2.953390987628 |
| O  | -2.462172144163 | -6.383024490123 | 4.042920492094 |
| TV | 7.295825272026  | 0.000000000000  | 0.000000000001 |
| TV | -1.487741938160 | 3.755753070354  | 0.000000000002 |
| TV | -5.877439333995 | -6.558606192673 | 3.593790848777 |

# EQ'-CO<sub>2</sub> 76

|   |                 |                 |                 |
|---|-----------------|-----------------|-----------------|
| C | -2.032854829432 | 1.198624118540  | 0.052000649004  |
| C | 1.012620561057  | 2.179240061389  | -0.354650354240 |
| C | -0.618855890426 | 2.319055295648  | -1.086814236061 |
| C | -2.382282519954 | -0.947138654702 | 3.051963038128  |
| C | 0.663180169015  | 0.033468690211  | 2.645352592020  |
| C | -0.968277095884 | 0.173299380748  | 1.913200121210  |
| O | -0.544857733046 | 4.545205293306  | -0.475903845064 |
| O | 0.242824702851  | 0.450197628533  | 1.409325804267  |
| O | -1.944370516340 | 0.745619756710  | 1.282015924400  |
| O | -0.542117151484 | -1.132147472393 | 0.171785112886  |
| O | -0.891551260251 | -3.277903501410 | 3.171792634756  |
| O | -0.151200850920 | 2.540268100713  | 0.271371112111  |
| O | -1.047117254000 | 0.973040568191  | -0.824549652156 |
| O | -0.500643391817 | 0.394435647763  | 3.271432342052  |
| O | -1.396564332789 | -1.172714335688 | 2.175403942126  |



|    |                 |                 |                |
|----|-----------------|-----------------|----------------|
| O  | -0.894292571338 | 2.399421756203  | 2.524061596170 |
| O  | -0.106627620026 | -1.695585329063 | 4.409322758548 |
| O  | -2.293803586434 | -1.400123797478 | 4.281990884334 |
| TV | 4.581424231288  | -0.000000000000 | 0.000000000000 |
| TV | -1.874013102797 | 3.681712053343  | 0.000000000000 |
| TV | -0.698872316596 | -4.291536577438 | 6.000000612890 |

# EQ'-CO<sub>2</sub> 77

|    |                 |                 |                 |
|----|-----------------|-----------------|-----------------|
| C  | 0.167884639797  | 3.162362541193  | 0.553950189117  |
| C  | 2.417815302349  | 1.483513817704  | -0.220529664520 |
| C  | -0.599131983980 | 1.410664108849  | -1.212461801007 |
| C  | -0.898055655445 | 2.846970811119  | 3.639254195579  |
| C  | 1.351805386752  | 1.168135613272  | 2.864740702171  |
| C  | -1.665105401984 | 1.095224272615  | 1.872862955679  |
| O  | 1.253568181366  | 3.626301992706  | 0.506262714579  |
| O  | -0.740552885016 | 0.224925189460  | 1.484269733395  |
| O  | -2.172978220715 | 1.936600130181  | 0.992232693581  |
| O  | -3.127975780679 | -1.147337195092 | -0.980595646022 |
| O  | -4.193922623360 | -1.462689274162 | 2.104634561285  |
| O  | -0.203532184828 | 2.086159409017  | -0.071084699129 |
| O  | -1.586873990825 | 0.593642876806  | -0.660052367458 |
| O  | -1.269481328889 | 1.770756786369  | 3.014237525477  |
| O  | -2.652830276670 | 0.278243267624  | 2.425306229586  |
| O  | 0.187639190053  | 3.310880822102  | 3.591547669448  |
| O  | -1.806504731176 | -0.090430010777 | 4.569535610750  |
| O  | -3.238964936250 | 1.621253045608  | 4.077503776443  |
| TV | 4.913919586191  | -0.000000000000 | 0.000000000000  |
| TV | 0.036911002705  | 3.299094210705  | 0.000000000000  |
| TV | -2.131933298067 | -0.630783106186 | 6.170576372768  |

# EQ'-CO<sub>2</sub> 78

|    |                 |                 |                 |
|----|-----------------|-----------------|-----------------|
| C  | -1.235575536350 | 0.440450946752  | 1.151548742838  |
| C  | -0.237328956824 | 3.006040201594  | -0.439501057816 |
| C  | -0.218031503022 | 0.538159568770  | -1.089716491870 |
| C  | -0.757735652609 | -0.809359423955 | 4.312666192556  |
| C  | 0.240433613237  | 1.756419481141  | 2.721613659116  |
| C  | 0.259691221823  | -0.711445131561 | 2.071376724527  |
| O  | -0.295753555866 | 8.805459733830  | -0.757897254979 |
| O  | 0.951464995359  | -2.188895211319 | 0.281950742237  |
| O  | -0.851700004464 | 1.525664294062  | 1.996881896243  |
| O  | -2.527041611765 | 0.304746968705  | 1.388438602618  |
| O  | -2.049166117841 | -0.945020239732 | 4.549654922649  |
| O  | -1.207177836693 | 0.389720042813  | -2.021864740676 |
| O  | -1.079166101304 | 0.913008714801  | -0.059197808637 |
| O  | -0.729522761045 | -0.859782267662 | 1.139320759233  |
| O  | -0.601395447094 | -0.336677370517 | 3.101987981877  |
| O  | 0.181991801115  | 7.555855901201  | 2.403212178938  |
| O  | 1.429219902240  | -3.438571650630 | 3.443028169007  |
| O  | -0.373877328873 | 0.275942178678  | 5.158000877630  |
| TV | 3.453902572143  | 0.000000000000  | -0.000000000000 |
| TV | -0.464812427939 | 4.586913614915  | 0.000000000001  |
| TV | 0.955537421600  | -2.499340880882 | 6.322237674936  |

# EQ'-CO<sub>2</sub> 79

|   |                 |                |                 |
|---|-----------------|----------------|-----------------|
| C | -1.903606829200 | 0.547486616269 | 0.932361482988  |
| C | 1.401088693680  | 3.351328181435 | -0.993953311373 |
| C | -1.857801969754 | 0.503484067234 | -0.941386213171 |

|    |                 |                 |                 |
|----|-----------------|-----------------|-----------------|
| C  | 1.332264208339  | 0.547488078711  | 0.932374811216  |
| C  | 4.636982799048  | 3.351291393191  | -0.993928495559 |
| C  | 1.378056121820  | 0.503487931675  | -0.941375800740 |
| O  | 3.178399440882  | 7.595728396329  | -0.066719489242 |
| O  | -1.004772371580 | -1.802433749957 | 1.599267105297  |
| O  | -1.250150012521 | 1.395962614968  | 1.672731037150  |
| O  | -2.638131855622 | 1.202189542807  | -0.042715149483 |
| O  | 0.597726009202  | 1.202171454754  | -0.042679672856 |
| O  | -1.137882546789 | 1.214033691287  | -1.746464620441 |
| O  | -1.136133184935 | -0.132344080697 | 0.023982764166  |
| O  | 2.098023123984  | 1.214133193234  | -1.746296392103 |
| O  | 2.099679048576  | -0.132395865544 | 0.024000249701  |
| O  | 6.414375606257  | 7.595646415932  | -0.066765999048 |
| O  | 2.231072967818  | -1.802467646122 | 1.599279499903  |
| O  | 1.985719327072  | 1.395978322470  | 1.672763851271  |
| TV | 6.471706113649  | 0.000000000000  | 0.000000000000  |
| TV | 1.240356737245  | 4.713621652216  | 0.000000000000  |
| TV | -1.600694598978 | -1.487335933094 | 3.295117381109  |

# EQ'-CO<sub>2</sub> 80

|    |                 |                 |                 |
|----|-----------------|-----------------|-----------------|
| C  | -1.169047935368 | 2.117379816083  | 0.733118305496  |
| C  | 0.525795653741  | 0.957195487695  | 0.485704264394  |
| C  | -1.810487170794 | 0.330181871154  | -1.401929439585 |
| C  | -2.968962739466 | 0.959301500369  | 3.980822471888  |
| C  | -1.274144000653 | -0.200911741578 | 3.733398286652  |
| C  | -3.610433889655 | -0.827928706620 | 1.845766940405  |
| O  | 1.275454075368  | 6.304433521180  | 0.863491670620  |
| O  | -0.746821623766 | -0.224220814490 | 2.532904466112  |
| O  | -0.797922366788 | 0.804321670284  | 0.478992564449  |
| O  | -1.652774195569 | 2.709922695645  | -0.181240842615 |
| O  | -3.452716107312 | 1.551827509039  | 3.066458864438  |
| O  | -1.026307100583 | 1.401125649462  | -1.821645695755 |
| O  | -0.761025301093 | -0.572751937751 | -1.250350815464 |
| O  | -2.826259304342 | 0.243023731488  | 1.426056629385  |
| O  | -2.560957699142 | -1.730842966084 | 1.997349715614  |
| O  | -0.524492582666 | 5.146335857546  | 4.111189957368  |
| O  | -2.546766849987 | -1.382327958774 | 5.780606384749  |
| O  | -2.597864518709 | -0.353771569375 | 3.726692142418  |
| TV | 3.891590308996  | -0.000000000000 | -0.000000000000 |
| TV | 0.880114723962  | 3.887756274760  | -0.000000000000 |
| TV | -3.599885759332 | -2.316205191293 | 6.495396449544  |

# EQ'-CO<sub>2</sub> 81

|   |                 |                 |                 |
|---|-----------------|-----------------|-----------------|
| C | 0.293664052782  | -1.757596175463 | 0.910423830363  |
| C | -0.742728791796 | -0.588777774549 | 1.931368815364  |
| C | -0.654203670732 | -4.156857692480 | 2.728817049390  |
| C | -1.690584707145 | -2.988025353601 | 3.749760305928  |
| C | -1.602070852002 | -6.556073452354 | 4.547183602763  |
| C | -2.638466675982 | -5.387278841563 | 5.568143594908  |
| O | -2.296143631278 | 1.229536270465  | -0.398545369957 |
| O | -3.244034794873 | -1.169648729593 | 1.419843077381  |
| O | -1.526354937738 | 0.321238403261  | 1.415184352732  |
| O | -2.474238055672 | -2.078025173601 | 3.233583731139  |
| O | -1.931546797281 | -4.240191127784 | 3.235995851022  |
| O | -0.411948600328 | -2.905426771436 | 3.242193665970  |
| O | -0.983676311531 | -1.840958246498 | 1.417608625636  |
| O | -4.191944964455 | -3.568898489847 | 3.238211862053  |

|    |                 |                 |                 |
|----|-----------------|-----------------|-----------------|
| O  | 0.535908474847  | -0.506156245447 | 1.423786630884  |
| O  | -3.422123450318 | -4.477281981304 | 5.051913813433  |
| O  | -2.879399330457 | -6.639436647263 | 5.054398964638  |
| O  | -1.359840322677 | -5.304637871288 | 5.060566592193  |
| TV | 6.039666218924  | 0.000000000001  | -0.000000000000 |
| TV | -2.610721728524 | 2.988449657300  | 0.000000000000  |
| TV | -2.843641924546 | -7.197722697668 | 5.455156065682  |

# EQ'-CO<sub>2</sub> 82

|    |                 |                 |                 |
|----|-----------------|-----------------|-----------------|
| C  | -1.292337367139 | -1.223108499177 | 0.606655596248  |
| C  | 0.545919420731  | 4.315523556254  | -1.651788118575 |
| C  | 0.364673558370  | 0.392010467362  | 0.426787099181  |
| C  | -3.093339778547 | -3.702346698712 | 2.724390987793  |
| C  | -1.255052673373 | 1.836288240111  | 0.465942611630  |
| C  | -1.436299314916 | -2.087246079184 | 2.544517590793  |
| O  | 1.956367465874  | 8.579338578437  | -0.347429241789 |
| O  | -0.568545553381 | -2.026319617264 | 1.406422629373  |
| O  | -3.974370353526 | 1.784563136378  | 0.417296344304  |
| O  | -2.468182738188 | -1.333273503447 | 0.477753982436  |
| O  | -4.269187791576 | -3.812495620301 | 2.595503710360  |
| O  | -0.043750708417 | 3.649736505160  | -0.858625982043 |
| O  | -0.642159086059 | -0.350759300374 | -0.087891186953 |
| O  | -1.844726225580 | 1.170506095950  | 1.259104643474  |
| O  | -2.443141944451 | -2.830006508511 | 2.029855294644  |
| O  | 0.155402704749  | 6.100094054530  | 1.770298779162  |
| O  | -2.369524842180 | -4.505540770073 | 3.524152583520  |
| O  | -5.775338029659 | -0.694680204695 | 2.535017670888  |
| TV | 4.017780782449  | 0.000000000000  | 0.000000000000  |
| TV | -0.166839280903 | 5.965253926792  | 0.000000000003  |
| TV | -3.601942851692 | -4.958466909985 | 4.235458648237  |

# EQ'-CO<sub>2</sub> 83

|    |                 |                 |                 |
|----|-----------------|-----------------|-----------------|
| C  | -2.374780354867 | 0.113507928345  | 0.747915755293  |
| C  | 1.999134303159  | 4.098827948420  | -1.095061794876 |
| C  | -0.787929127859 | 0.633971125604  | 0.001497696235  |
| C  | -4.236624651681 | -1.660901633852 | 3.352539015870  |
| C  | 0.137244311201  | 2.324346286896  | 1.509562796880  |
| C  | -2.649784135576 | -1.140453226705 | 2.606092761196  |
| O  | 3.804966102372  | 9.088673363126  | -0.041730541991 |
| O  | -1.652534907207 | -2.649178044901 | 0.465225615287  |
| O  | -1.718853987544 | 1.351099867883  | 0.732027920505  |
| O  | -3.655883295586 | 0.149155586749  | 0.963716398694  |
| O  | -5.517721122587 | -1.625253889318 | 3.568335605567  |
| O  | 0.000324098560  | 1.088365126958  | -0.910062943072 |
| O  | -1.719605439062 | -0.310085535927 | -0.405907619335 |
| O  | -1.861528220411 | -0.686067174049 | 1.694529833594  |
| O  | -3.581447087279 | -2.084531031929 | 2.198714754589  |
| O  | 1.943180637798  | 7.314223194839  | 2.562912326689  |
| O  | -3.514350642543 | -4.423596850389 | 3.069793148006  |
| O  | -3.580706190869 | -0.423311600360 | 3.336604910905  |
| TV | 3.706951850585  | -0.000000000025 | 0.000000000007  |
| TV | 1.801957696357  | 5.452068148357  | -0.000000000001 |
| TV | -3.723689368393 | -3.548845043848 | 5.209211099786  |

# EQ'-CO<sub>2</sub> 84

|   |                 |                 |                 |
|---|-----------------|-----------------|-----------------|
| C | -1.884362866112 | -0.227868441477 | 0.660788562004  |
| C | 1.686181810062  | 4.320272496564  | -2.210181871315 |

|    |                 |                 |                 |
|----|-----------------|-----------------|-----------------|
| C  | -0.039603119702 | -0.080729570373 | 0.465107273066  |
| C  | -4.113269206694 | -2.433335722942 | 3.082992254096  |
| C  | -0.542725190561 | 2.114795642297  | 0.212010523827  |
| C  | -2.268514074732 | -2.286209597781 | 2.887326894758  |
| O  | 2.780977648483  | 7.418259381910  | 0.410767496153  |
| O  | -0.834221478790 | -0.988948262061 | 1.194409645403  |
| O  | -3.889907541850 | 1.213067529467  | 0.817385851849  |
| O  | -3.016059279180 | -0.711059758992 | 0.178640730571  |
| O  | -5.244968088967 | -2.916520233862 | 2.600840927640  |
| O  | 0.152114915798  | 2.817900698008  | -0.693892178349 |
| O  | -1.091259380551 | 0.114969140049  | -0.425387966686 |
| O  | -2.076790281837 | 0.612419575962  | 1.728341123428  |
| O  | -3.320165120298 | -2.090510292405 | 1.996823638182  |
| O  | 0.552068159340  | 5.212794820026  | 2.832979490869  |
| O  | -3.063126038804 | -3.194426198593 | 3.616620853331  |
| O  | -6.118830651333 | -0.992409536948 | 3.239625157583  |
| TV | 4.106064469700  | -0.000000000000 | 0.000000000000  |
| TV | 0.360177683167  | 5.097221365571  | 0.000000000003  |
| TV | -4.457812893771 | -4.410948431874 | 4.844433170270  |

# EQ'-CO<sub>2</sub> 85

|    |                 |                 |                 |
|----|-----------------|-----------------|-----------------|
| C  | -1.267597149732 | 2.168328681195  | 0.618154971864  |
| C  | 0.773509191250  | 3.827951965938  | -1.993749354089 |
| C  | 0.652246848296  | 5.004768067221  | 0.610007417257  |
| C  | -1.501560535797 | 0.483728467433  | 3.214292996634  |
| C  | 0.539504047895  | 2.143333116156  | 0.602381680800  |
| C  | 0.418264066195  | 3.320160134658  | 3.206156683284  |
| O  | 1.521517795851  | 4.587149719917  | 1.245290040983  |
| O  | -2.258270432613 | -0.278371868902 | -0.028017763270 |
| O  | -0.371312549345 | 1.171786791499  | 0.808492842125  |
| O  | -6.023507146763 | -7.326741928449 | -1.007523793941 |
| O  | -6.257514242676 | -9.011355903429 | 1.588617760537  |
| O  | 1.449213743177  | 1.934263687307  | -0.368905022417 |
| O  | -0.356770645822 | 3.139204621201  | 0.413358004662  |
| O  | 1.215241439633  | 0.249662353204  | 2.227241785821  |
| O  | -0.590732575862 | 1.454597824890  | 3.009471596124  |
| O  | 1.287557231534  | 2.902525067102  | 3.841395850066  |
| O  | -2.492260797357 | -1.962982635170 | 2.568140234577  |
| O  | -0.605274419176 | -0.512804983813 | 3.404678175446  |
| TV | 3.613984332569  | 0.000000000000  | 0.000000000001  |
| TV | 2.040064539441  | 5.693654850340  | 0.000000000000  |
| TV | -0.467965382147 | -3.369205287744 | 5.192290766016  |

# EQ'-CO<sub>2</sub> 86

|   |                 |                 |                 |
|---|-----------------|-----------------|-----------------|
| C | 3.181101281551  | -1.405511211757 | 1.554409932293  |
| C | -2.666845668366 | -1.298048643447 | -0.789530184553 |
| C | 0.113612488122  | 0.304929392720  | 1.553329332095  |
| C | 6.974598178038  | -1.405513929814 | 1.554417005760  |
| C | 1.126645808449  | -1.298043955025 | -0.789532950534 |
| C | 3.907112357850  | 0.304917858624  | 1.553329276863  |
| O | -2.100815095375 | 0.602653203011  | -2.445500826408 |
| O | -1.362013858985 | -1.162765728384 | -1.026366933817 |
| O | 2.690646253277  | -0.195125870281 | 1.097004213464  |
| O | 0.487343278524  | -0.131223618410 | -0.896042817330 |
| O | 4.280829100812  | -0.131225801203 | -0.896031172674 |
| O | -6.043596788196 | -0.732415689491 | -4.299394516642 |
| O | 2.562855707031  | -2.354516548450 | 0.882843398799  |

|    |                 |                 |                 |
|----|-----------------|-----------------|-----------------|
| O  | -2.250120075415 | -0.732390725889 | -4.299368177814 |
| O  | 6.356358842470  | -2.354532272594 | 0.882850202938  |
| O  | 1.692635544483  | 0.602591173919  | -2.445558229257 |
| O  | 2.431479382089  | -1.162776411124 | -1.026361309340 |
| O  | 6.484120080814  | -0.195161283894 | 1.096998297025  |
| TV | 7.586966429352  | 0.000000000000  | -0.000000000000 |
| TV | -1.710717763117 | 3.524673403454  | -0.000000000000 |
| TV | 2.806139641733  | -1.557203199214 | 3.787897475995  |

# EQ'-CO<sub>2</sub> 87

|    |                 |                 |                 |
|----|-----------------|-----------------|-----------------|
| C  | -1.844894011120 | 0.089535223764  | 0.872348839089  |
| C  | 0.099781238912  | 4.655500078875  | -2.634942956278 |
| C  | -0.281523256222 | 0.569759834555  | -0.835043685632 |
| C  | -2.971312430022 | -1.505627174034 | 3.446700083076  |
| C  | -1.026639373384 | 3.060317207945  | -0.060603050510 |
| C  | -1.407943472507 | -1.025429103650 | 1.739312470483  |
| O  | 2.056308062636  | 8.218716291409  | -0.045744388047 |
| O  | -0.673706261402 | -1.901814740149 | 1.022278199780  |
| O  | -1.425754712683 | 1.241136649683  | 1.431370787872  |
| O  | -3.183734751077 | -0.028265459642 | 0.853009374639  |
| O  | -4.310153683682 | -1.623441056090 | 3.427379452356  |
| O  | 0.411918091680  | 1.156279725519  | 0.136435230876  |
| O  | -1.399190848871 | -0.061909349479 | -0.376468117666 |
| O  | -0.714528781154 | -0.438902344597 | 2.710797319993  |
| O  | -2.525656643315 | -1.657046400311 | 2.197864904021  |
| O  | 0.929927582196  | 6.623506204793  | 2.528633723326  |
| O  | -1.800081592663 | -3.496970136456 | 3.596649452465  |
| O  | -2.552167128245 | -0.354032929858 | 4.005728273238  |
| TV | 3.868133958409  | -0.000000000000 | -0.000000000000 |
| TV | 0.392661479751  | 5.156906171524  | -0.000000000000 |
| TV | -2.252808204256 | -3.190342105066 | 5.148718316025  |

# EQ'-CO<sub>2</sub> 88

|    |                 |                 |                 |
|----|-----------------|-----------------|-----------------|
| C  | -1.813491219960 | 0.850005107029  | 0.211189009917  |
| C  | 3.070433231845  | 3.147719937476  | -0.414930446898 |
| C  | 0.215147708317  | 0.271754120899  | 0.205934422013  |
| C  | -3.992237362929 | -0.975565211771 | 2.828329837553  |
| C  | 0.891719601781  | 1.322112744760  | 2.202148829844  |
| C  | -1.963623491200 | -1.553872581981 | 2.823001989291  |
| O  | -1.620745953246 | 5.115792199542  | -1.546276719242 |
| O  | -2.535474849272 | -0.270643674050 | -0.106266875574 |
| O  | -1.319936076293 | -0.617667238309 | 3.493098741993  |
| O  | -2.344482656480 | 2.037006742544  | 0.265937771838  |
| O  | -4.523187118127 | 0.211446831614  | 2.883118686534  |
| O  | 0.832912770101  | 2.417628371738  | -1.126942418810 |
| O  | -0.707142461517 | 0.869391712987  | -0.596118918740 |
| O  | -1.345815964130 | 0.591934901535  | 1.490137935344  |
| O  | -2.885943207284 | -0.956232040568 | 2.020958503141  |
| O  | -3.799421552951 | 3.290133918962  | 1.070873474907  |
| O  | -4.714189433715 | -2.096267098122 | 2.510817576523  |
| O  | -3.498642654005 | -2.443324956419 | 6.110202107138  |
| TV | 5.065049205578  | -0.000000000000 | -0.000000000000 |
| TV | 1.801289056875  | 3.769685524129  | 0.000000000003  |
| TV | -4.357442220825 | -3.651309740093 | 5.234198226280  |

# EQ'-CO<sub>2</sub> 89

|   |                |                |                 |
|---|----------------|----------------|-----------------|
| C | 2.065735137820 | 2.819730529388 | -3.118077559213 |
|---|----------------|----------------|-----------------|

|    |                 |                 |                 |
|----|-----------------|-----------------|-----------------|
| C  | 9.866650731333  | -1.153445223314 | 0.392252266781  |
| C  | 4.257296677472  | 1.404786504675  | 0.262419933638  |
| C  | 1.205143752058  | 0.774175270390  | -0.705172557504 |
| C  | 9.006023142416  | -3.208104769605 | 2.801965843622  |
| C  | 3.401963927548  | -0.654839081435 | 2.667545229200  |
| O  | 3.326777122261  | 2.010805392409  | -0.144021009559 |
| O  | -2.801018318164 | -1.749483644814 | 0.725922057430  |
| O  | -3.265663728697 | 3.964164253276  | -1.034952106561 |
| O  | -2.043560660396 | -3.611575521553 | 1.613562858663  |
| O  | -2.902421268441 | -5.662135826661 | 4.028199834496  |
| O  | -5.288370910478 | -1.440190817318 | -2.470374142903 |
| O  | -3.156844019348 | -1.495731562728 | -1.770327420212 |
| O  | -6.122138913079 | -3.489624187059 | -0.097171873624 |
| O  | -4.000552286685 | -3.544361803545 | 0.624884482063  |
| O  | 2.490195457995  | -0.071023545751 | 2.199665224250  |
| O  | -3.662161165062 | -3.794443272380 | 3.147490457212  |
| O  | -4.136522957334 | 1.915784611934  | 1.391155739795  |
| TV | 5.726195948065  | 0.000000000000  | 0.000000000000  |
| TV | 2.415158048545  | 3.678550390016  | 0.000000000001  |
| TV | -1.712469212150 | -4.106536505453 | 4.825958005459  |

# EQ'-CO<sub>2</sub> 90

|    |                 |                 |                 |
|----|-----------------|-----------------|-----------------|
| C  | 1.279922884038  | -0.732288997460 | 0.784755979001  |
| C  | -2.616076460233 | -1.567013539172 | -0.822396478418 |
| C  | -1.017311108502 | 0.554366156019  | 0.933786295013  |
| C  | 1.434545045501  | -2.371305015931 | 4.101224845582  |
| C  | -2.461231910498 | -3.205880161144 | 2.494048678857  |
| C  | -0.862660316779 | -1.084763984025 | 4.249972083073  |
| O  | -1.445467600159 | 0.881478682707  | -2.305056998922 |
| O  | -1.369932569070 | -1.204609702974 | -1.264423944912 |
| O  | 0.639339179829  | 0.024963780509  | 1.674073901379  |
| O  | 0.804404736236  | -0.316238808538 | -0.485743277069 |
| O  | 0.959185234129  | -1.955153598244 | 2.830699993266  |
| O  | -0.993597660108 | -1.335514727684 | -3.434637654535 |
| O  | 1.036338123594  | -2.034930191424 | 0.492005344973  |
| O  | -0.838919937327 | -2.974129816270 | -0.118046551849 |
| O  | 1.190975291027  | -3.673934332546 | 3.808353130399  |
| O  | -1.290598063305 | -0.757236486414 | 1.011245796867  |
| O  | -1.215002615377 | -2.843400898497 | 2.052345875716  |
| O  | 0.793930488270  | -1.614107556394 | 4.990562933762  |
| TV | 3.878786654341  | -0.000000000000 | 0.000000000000  |
| TV | -0.093409069537 | 4.021947399310  | -0.000000000001 |
| TV | 0.309521365890  | -3.277800283550 | 6.632770817801  |

# EQ'-CO<sub>2</sub> 91

|   |                 |                 |                 |
|---|-----------------|-----------------|-----------------|
| C | -3.067541886245 | 0.279501034100  | 0.624991879887  |
| C | 4.545995832996  | 3.058896657107  | -1.236086948349 |
| C | -0.995443730055 | 0.650071820860  | -0.285605470857 |
| C | -4.968395955209 | -0.767133768181 | 2.569006980744  |
| C | 2.189431654403  | 2.309134625840  | 0.986002520782  |
| C | -2.887611885572 | -0.446234614644 | 1.914201623389  |
| O | 2.754616552912  | 9.183115845031  | 0.315328440551  |
| O | -0.434665476493 | -2.248913080705 | 0.086339556735  |
| O | -3.074625349589 | 1.582316253694  | 0.907349151844  |
| O | -4.235155927988 | -0.160683038756 | 0.203896902391  |
| O | -5.915348669459 | -1.112639252594 | 1.702830424396  |
| O | -0.953975710356 | 1.810964756492  | 0.366389659097  |

|    |                 |                 |                 |
|----|-----------------|-----------------|-----------------|
| O  | -2.135283187584 | -0.028315207034 | -0.285734069803 |
| O  | -2.829086561759 | 0.519744686759  | 2.883610272998  |
| O  | -3.832793781824 | -1.357492427597 | 2.260209613611  |
| O  | 0.691159264141  | 8.239625484183  | 2.424479229890  |
| O  | -2.523991593108 | -3.177049109322 | 2.312002601250  |
| O  | -4.913313201788 | 0.572009708574  | 2.439747970208  |
| TV | 4.167230170473  | -0.000000000000 | -0.000000000000 |
| TV | 0.894390813672  | 5.673206807577  | -0.000000000000 |
| TV | -4.346155044748 | -1.769934751835 | 4.252893452128  |

# EQ'-CO<sub>2</sub> 92

|    |                 |                 |                 |
|----|-----------------|-----------------|-----------------|
| C  | 1.687966903257  | -1.421130292852 | 1.638375979288  |
| C  | -3.525103455296 | -0.110918339089 | -0.582541151987 |
| C  | -1.365314695417 | -0.006725278589 | 0.013463472924  |
| C  | 2.781073339803  | -3.643980031008 | 4.257495193736  |
| C  | -2.431996225057 | -2.333768553948 | 2.036576671796  |
| C  | -0.272205621562 | -2.229574720136 | 2.632579933432  |
| O  | -2.898434257118 | 0.920284005848  | -2.515241918251 |
| O  | -3.245655906906 | -1.062994187409 | -1.448321526509 |
| O  | 1.805975814363  | -0.635552401805 | 2.718177776983  |
| O  | 2.848251593666  | 0.695057125802  | -0.314781870220 |
| O  | 3.941358366841  | -1.527794025243 | 2.304334239642  |
| O  | -2.827518705622 | -1.463067813763 | -3.510997885869 |
| O  | 1.301881843908  | -0.670631964939 | 0.565599791974  |
| O  | -1.734412063351 | -3.685915965103 | -0.891878941189 |
| O  | 2.394988244018  | -2.893476956489 | 3.184718819768  |
| O  | -1.805328530896 | -1.302567224117 | 0.103871465834  |
| O  | -2.152554240981 | -3.285850002810 | 1.170799945850  |
| O  | 2.899082961461  | -2.858395242619 | 5.337292033044  |
| TV | 5.296878015784  | 0.000000000000  | 0.000000000001  |
| TV | 1.336141985636  | 3.594984539551  | -0.000000000002 |
| TV | 2.186210835705  | -4.445696635149 | 5.238235649077  |

# EQ'-CO<sub>2</sub> 93

|    |                 |                 |                 |
|----|-----------------|-----------------|-----------------|
| C  | -2.041477726753 | 2.347121254081  | 2.509448848199  |
| C  | 1.906608430234  | 3.700648138422  | -3.283126055253 |
| C  | 0.986564608125  | 2.781335299358  | -1.335118197944 |
| C  | -1.626963180901 | 6.092430604931  | 2.509399632902  |
| C  | 2.320585661524  | 7.445458463114  | -3.283387630442 |
| C  | 1.400479492808  | 6.526638667214  | -1.335170123494 |
| O  | 1.935773694228  | 3.379338584110  | -0.541118351743 |
| O  | -2.014700084003 | -0.595526609919 | 1.481481102825  |
| O  | -3.082209780349 | 1.438136705691  | 2.232880763324  |
| O  | -1.671522491816 | -1.937603355887 | -1.445478991466 |
| O  | -1.256811385929 | 1.807583283222  | -1.445308318303 |
| O  | 0.039118754827  | 1.539071354417  | 0.406784834756  |
| O  | -2.146265922209 | 1.252314770833  | 0.411503425454  |
| O  | 0.453063461165  | 5.284361736207  | 0.406788100038  |
| O  | -1.732405968813 | 4.997820279676  | 0.411578591915  |
| O  | 2.350058287816  | 7.124153818643  | -0.541251353288 |
| O  | -1.600739517557 | 3.149834441218  | 1.481445049291  |
| O  | -2.668057692761 | 5.183415389503  | 2.233124330952  |
| TV | 4.568994827396  | 0.000000000000  | 0.000000000000  |
| TV | 0.828703133096  | 7.490641357033  | -0.000000000000 |
| TV | -3.054054627823 | -2.084415277209 | 2.997213535988  |

# EQ'-CO<sub>2</sub> 94

|    |                 |                 |                 |
|----|-----------------|-----------------|-----------------|
| C  | 0.297622239784  | -1.836825881899 | 0.894658834730  |
| C  | -0.840751029588 | -0.563363945772 | 1.638270658344  |
| C  | -0.634331680808 | -4.112416730529 | 2.815754809372  |
| C  | -1.772715273671 | -2.838957084940 | 3.559364992463  |
| C  | -1.566262196464 | -6.388019388795 | 4.736853273183  |
| C  | -2.704663767474 | -5.114565181725 | 5.480456787065  |
| O  | -2.300373821378 | 1.039456013398  | -0.298506080779 |
| O  | -3.232312326821 | -1.236135100125 | 1.622593049694  |
| O  | -1.658894169755 | 0.376163529526  | 1.753333132883  |
| O  | -2.590837037703 | -1.899421452220 | 3.674417669908  |
| O  | -2.041867097076 | -4.070458649950 | 3.358888452857  |
| O  | -0.513642983955 | -2.727097441864 | 3.358168479327  |
| O  | -1.109907895211 | -1.794865135959 | 1.437794753133  |
| O  | -4.164251128892 | -3.511704848827 | 3.543687207806  |
| O  | 0.418320074323  | -0.451505511318 | 1.437075471128  |
| O  | -3.522807037888 | -4.175037747300 | 5.595528791190  |
| O  | -2.973821903325 | -6.346058806370 | 5.279978953211  |
| O  | -1.445593060919 | -5.002698181445 | 5.279277808261  |
| TV | 6.032133055068  | 0.000000000001  | 0.000000000000  |
| TV | -2.657737566112 | 2.960128906566  | 0.000000000000  |
| TV | -2.795867734079 | -6.826781077390 | 5.763283228216  |

# EQ'-CO<sub>2</sub> 95

|    |                 |                 |                 |
|----|-----------------|-----------------|-----------------|
| C  | -2.502793491832 | 2.213712377717  | 0.302057552655  |
| C  | 1.180686264448  | 1.569867868866  | -0.037002750837 |
| C  | -0.432965159772 | 2.399953960194  | -0.578860283828 |
| C  | -3.959749912194 | 0.656402498375  | 2.934498799802  |
| C  | -0.276266269122 | 0.012547133607  | 2.595424733124  |
| C  | -1.889904883905 | 0.842657803366  | 2.053583739048  |
| O  | 1.138688068623  | 4.085148384574  | 0.222800609554  |
| O  | -0.857659602059 | 0.267301074298  | 1.355579364861  |
| O  | -2.128457453052 | 2.071523998243  | 1.618831483967  |
| O  | -1.208065716526 | -2.522243605727 | -2.620842969399 |
| O  | -2.665037287460 | -4.079538971378 | 0.011619649002  |
| O  | 0.197701603854  | 2.242780139617  | 0.641527059909  |
| O  | -1.569302458048 | 1.680480072069  | -0.473712243535 |
| O  | -1.259255896162 | 0.685442182608  | 3.273966260960  |
| O  | -3.026243341975 | 0.123176612208  | 2.158742982340  |
| O  | -0.318280920267 | 2.527834234983  | 2.855216771301  |
| O  | -2.314661935027 | -1.290030671950 | 3.988042752180  |
| O  | -3.585432412045 | 0.514218270568  | 4.251273858794  |
| TV | 4.990631095524  | -0.000000000000 | 0.000000000000  |
| TV | 0.053856816672  | 3.812919304182  | -0.000000000000 |
| TV | -2.913939375671 | -3.114608174247 | 5.264876991254  |

# EQ'-CO<sub>2</sub> 96

|   |                 |                 |                |
|---|-----------------|-----------------|----------------|
| C | 0.012179512844  | -1.934546241345 | 0.710232478084 |
| C | -0.410460776569 | -0.343204467236 | 1.495487195853 |
| C | -1.094500500291 | -4.309743396651 | 2.231500668823 |
| C | -1.517140813902 | -2.718395927527 | 3.016748588720 |
| C | -2.201179926690 | -6.684945474303 | 3.752765126030 |
| C | -2.623814265322 | -5.093598125165 | 4.538017795060 |
| O | -2.211108690382 | 0.260841188898  | 0.191106614534 |
| O | -3.317791280084 | -2.114356192865 | 1.712373746526 |
| O | -0.668828378215 | 0.663419703805  | 2.015549369686 |
| O | -1.775512273985 | -1.711771768719 | 3.536809202084 |
| O | -2.262361153336 | -3.787782271557 | 2.723127248610 |



|    |                 |                 |                 |
|----|-----------------|-----------------|-----------------|
| O  | -0.348840694411 | -3.240301415724 | 2.524565709485  |
| O  | -1.155683803788 | -1.412584738390 | 1.201853760371  |
| O  | -4.424471248157 | -4.489559265644 | 3.233641224289  |
| O  | 0.757840690647  | -0.865103793385 | 1.003304270130  |
| O  | -2.882186462376 | -4.086975971526 | 5.058076663387  |
| O  | -3.369036959055 | -6.162980022765 | 4.244393273869  |
| O  | -1.455517526916 | -5.615504311711 | 4.045830198097  |
| TV | 7.346695444181  | 0.000000000001  | -0.000000000000 |
| TV | -2.477508453278 | 3.203960814840  | 0.000000000000  |
| TV | -3.320059522792 | -7.125581631491 | 4.563799557572  |

# EQ'-CO<sub>2</sub> 97

|    |                 |                 |                 |
|----|-----------------|-----------------|-----------------|
| C  | -2.579531290699 | 1.962182571619  | 0.666281737185  |
| C  | 1.829806746940  | 1.666566169572  | -0.389550540407 |
| C  | -0.379465260198 | 2.265022346143  | -0.655743919810 |
| C  | -2.703062452395 | 0.143807551612  | 3.885068030807  |
| C  | 1.706339032313  | -0.151855541753 | 2.829180229893  |
| C  | -0.502972415668 | 0.446589832596  | 2.562953919742  |
| O  | -0.148227918048 | 3.557388251561  | -0.984375839609 |
| O  | -0.642797420626 | 0.002972307705  | 1.299642395706  |
| O  | -2.474553359749 | 0.831405395526  | 1.403422446880  |
| O  | -1.038560956626 | -0.200579731220 | -1.208587786389 |
| O  | -1.162010370365 | -2.018934183200 | 2.010213340339  |
| O  | 0.570271948507  | 1.547194996522  | 0.035783833165  |
| O  | -1.351902985746 | 2.232842160208  | 0.263738116032  |
| O  | 0.446793867087  | -0.271253361085 | 3.254405623208  |
| O  | -1.475447094449 | 0.414456703214  | 3.482403600945  |
| O  | -0.271634428529 | 1.738964330015  | 2.234434757962  |
| O  | -0.766340997092 | -1.815335794957 | 4.518375130962  |
| O  | -2.598119621980 | -0.986879502876 | 4.622266031056  |
| TV | 5.374913865989  | 0.000000000000  | 0.000000000000  |
| TV | -2.567685980517 | 2.924135891354  | -0.000000000000 |
| TV | -0.247140388176 | -3.636651528457 | 6.437454627636  |

# EQ'-CO<sub>2</sub> 98

|    |                 |                 |                 |
|----|-----------------|-----------------|-----------------|
| C  | 0.628998900668  | -1.386408771622 | 1.086024268018  |
| C  | -1.572225246428 | -0.617959731044 | 1.086610282944  |
| C  | -1.435278313038 | -2.703120833714 | 3.332682853857  |
| C  | -3.636534658829 | -1.934668955546 | 3.333296932622  |
| C  | -3.499549101869 | -4.019827196423 | 5.579345009734  |
| C  | -5.700765699634 | -3.251377229616 | 5.579921066589  |
| O  | -1.482880030366 | 0.300457093374  | 0.082878078777  |
| O  | -3.547172589396 | -1.016253067342 | 2.329551038596  |
| O  | -1.559342374620 | 0.294754647580  | 2.089979822239  |
| O  | -3.623619296094 | -1.021952214122 | 4.336651489813  |
| O  | -3.634868899162 | -3.092984313076 | 3.330263386650  |
| O  | -1.437633240221 | -1.544889205657 | 3.332752598250  |
| O  | -1.570586141305 | -1.776276390850 | 1.083609145574  |
| O  | -5.611435035632 | -2.332956801842 | 4.576195666908  |
| O  | 0.626645802710  | -0.228179284683 | 1.086094775639  |
| O  | -5.687875445418 | -2.338665960510 | 6.583297558229  |
| O  | -5.699129029542 | -4.409693674460 | 5.576912333640  |
| O  | -3.501907829990 | -2.861597903611 | 5.579414502911  |
| TV | 6.113162346793  | 0.000000000001  | -0.000000000000 |
| TV | -2.100490174513 | 2.600644137645  | -0.000000000000 |
| TV | -6.192820677115 | -3.950109752502 | 6.739967894717  |

# EQ'-CO<sub>2</sub> 99

|    |                 |                 |                 |
|----|-----------------|-----------------|-----------------|
| C  | 1.030079840210  | -0.954196885223 | 1.275141633854  |
| C  | -1.850461184437 | -0.668653885399 | -0.840434920349 |
| C  | -0.716595537318 | 0.038623506685  | 2.294609784072  |
| C  | 4.541821259335  | -0.954191251506 | 1.275149045806  |
| C  | 1.661300334916  | -0.668658180736 | -0.840417605973 |
| C  | 2.795154191302  | 0.038603956106  | 2.294624086224  |
| O  | -1.247999698808 | -0.054683593220 | -4.906539930472 |
| O  | -1.063934118906 | -0.294296515360 | -1.814993184858 |
| O  | 0.526703164889  | -0.247617216142 | 2.266613486835  |
| O  | 0.677296675643  | -0.137105267757 | -0.444577230148 |
| O  | 4.189024867833  | -0.137104624647 | -0.444584700475 |
| O  | -1.271165628804 | -2.059688505592 | -3.116486884490 |
| O  | 0.617461489839  | -1.994427054859 | 0.917377163570  |
| O  | 2.240588913087  | -2.059711833134 | -3.116475187277 |
| O  | 4.129193650308  | -1.994413680876 | 0.917373774327  |
| O  | 2.263742331255  | -0.054694865861 | -4.906528951445 |
| O  | 2.447818077885  | -0.294321232773 | -1.814988199558 |
| O  | 4.038453114787  | -0.247622930056 | 2.266632364655  |
| TV | 7.023480144837  | 0.000000000004  | -0.000000000006 |
| TV | 0.013719110700  | 3.522601759795  | -0.000000000005 |
| TV | 0.003658821691  | -1.841317685112 | 4.242019582415  |

# EQ'-CO<sub>2</sub> 100

|    |                 |                 |                 |
|----|-----------------|-----------------|-----------------|
| C  | -0.756557872339 | -1.235021476575 | 0.451777674650  |
| C  | 0.405057442000  | -1.334794839061 | 1.845732283279  |
| C  | -2.656308514228 | 1.458614182508  | 0.451856256156  |
| C  | -1.494449786033 | 1.360069932137  | 1.845670522584  |
| C  | -4.556157112132 | 4.152090219898  | 0.451910375076  |
| C  | -3.394231161905 | 4.053576666750  | 1.845723119288  |
| O  | -3.384205953931 | 1.468346996492  | -0.455429911614 |
| O  | -5.283963496188 | 4.162778891372  | -0.455504882149 |
| O  | 1.133910975714  | -1.346194510049 | 2.752539879868  |
| O  | -0.765608324351 | 1.347688510920  | 2.752421485880  |
| O  | -2.804763824328 | 1.732037198105  | 1.758261618957  |
| O  | -1.346885901517 | 1.086462843736  | 0.539023806510  |
| O  | -0.904931424833 | -0.962052360806 | 1.758225774145  |
| O  | -7.183500298542 | 6.857199519244  | -0.455414936403 |
| O  | 0.552713194091  | -1.608013101969 | 0.538987577655  |
| O  | -2.665236492691 | 4.041775770820  | 2.752358077754  |
| O  | -4.704379764584 | 4.425321709504  | 1.758506053301  |
| O  | -3.246832394365 | 3.780195948112  | 0.538786498772  |
| TV | 7.556995890578  | 0.000000000001  | -0.000000000000 |
| TV | -5.698898480233 | 8.082081902414  | -0.000000000003 |
| TV | -1.497362139817 | -3.476451744503 | 1.755333760503  |

# EQ'-CO<sub>2</sub> 101

|   |                 |                 |                 |
|---|-----------------|-----------------|-----------------|
| C | 2.937062759234  | 0.908433979689  | -0.378293216985 |
| C | 1.239797438441  | -1.013533409810 | -1.642559641561 |
| C | 1.916460536239  | 0.476157284133  | 1.519886745522  |
| C | 0.219172162999  | -1.445892661130 | 0.255589879814  |
| C | 0.895824142392  | 0.043819905347  | 3.418053291290  |
| C | -0.801440133355 | -1.878161522196 | 2.153735423160  |
| O | -0.096059145267 | 1.984360254173  | -0.340464806375 |
| O | -1.116687339090 | 1.552041986823  | 1.557679964194  |
| O | 1.721361313396  | 0.846001403584  | 0.215654496454  |
| O | 0.700746316637  | 0.413695112453  | 2.113800327319  |

|    |                 |                 |                 |
|----|-----------------|-----------------|-----------------|
| O  | -1.315238051697 | -0.633293109930 | 2.013111756674  |
| O  | -1.659625447450 | -0.333496625880 | -0.230020608912 |
| O  | -0.294610585743 | -0.201014590383 | 0.114911599267  |
| O  | -2.137296360322 | 1.119737607771  | 3.455813543637  |
| O  | -0.639028399043 | 0.098842370360  | -2.128158172170 |
| O  | -0.319888014845 | -0.018635219348 | 4.011934882027  |
| O  | -2.335845642647 | -1.065618019710 | 3.911264625528  |
| O  | -2.680253823405 | -0.765799710520 | 1.668180453447  |
| TV | 5.115331453063  | -0.000000000000 | -0.000000000000 |
| TV | -1.531256805913 | 3.378845547703  | 0.000000000000  |
| TV | -3.061853100499 | -1.296964555242 | 5.694458339809  |

# EQ'-CO<sub>2</sub> 102

|    |                 |                 |                 |
|----|-----------------|-----------------|-----------------|
| C  | 1.097589378387  | 1.069734764648  | 1.341956471814  |
| C  | -0.186545627334 | 0.376290663093  | 1.093943338671  |
| C  | 0.011342621323  | 2.979880173519  | 1.341952148604  |
| C  | -1.272793522722 | 2.286434755199  | 1.093943078409  |
| C  | -1.074910681677 | 4.890023915813  | 1.341958572760  |
| C  | -2.359044470704 | 4.196579660290  | 1.093941188940  |
| O  | -1.567360494244 | 0.146501045845  | -0.522400733031 |
| O  | -2.653601135684 | 2.056651844035  | -0.522403265024 |
| O  | -3.359284480666 | 0.412154154802  | 0.791519172167  |
| O  | -4.445533264866 | 2.322296799275  | 0.791510538977  |
| O  | -1.306742227318 | 2.328229618052  | -0.239334878590 |
| O  | -0.603441313016 | 3.970976465511  | -1.555482152463 |
| O  | -0.220501024601 | 0.418086695128  | -0.239332032887 |
| O  | -3.739846537216 | 3.966790760138  | -0.522407260194 |
| O  | 0.482811458836  | 2.060835886527  | -1.555476282534 |
| O  | -5.531785857735 | 4.232443826202  | 0.791517531135  |
| O  | -2.392989677083 | 4.238379038542  | -0.239334253270 |
| O  | -1.689688853908 | 5.881122745281  | -1.555481218090 |
| TV | 5.502435953745  | 0.000000000000  | -0.000000000000 |
| TV | -3.258746217986 | 5.730434858939  | -0.000000000000 |
| TV | -1.716372473779 | -1.027887524196 | 3.197561312518  |

# EQ'-CO<sub>2</sub> 103

|    |                 |                 |                 |
|----|-----------------|-----------------|-----------------|
| C  | -5.627796873059 | 0.883609070510  | 0.164043257281  |
| C  | 0.370161279361  | 2.130353027993  | -0.869898651960 |
| C  | -2.060025228888 | 1.321587782181  | -0.070672738006 |
| C  | -7.094052119796 | 0.751500136933  | 1.865189922493  |
| C  | -1.096110575929 | 1.998243755134  | 0.831223002687  |
| C  | -3.526299655602 | 1.189455337604  | 1.630455804961  |
| O  | 1.958113679306  | 3.670397897306  | 0.508306649688  |
| O  | -0.513306548246 | 0.866801752507  | 1.279134572018  |
| O  | -1.751486881032 | 2.687792906020  | 1.817432059583  |
| O  | -2.164880262390 | -1.444658410720 | -0.585245993839 |
| O  | -3.631162083534 | -1.576797472077 | 1.115866019007  |
| O  | 2.935449809665  | 1.925500401208  | -0.079691356006 |
| O  | -1.353123591782 | 0.601335261358  | -0.979609187567 |
| O  | 1.469192017713  | 1.793386076839  | 1.621448718994  |
| O  | -2.819386935214 | 0.469223039867  | 0.721499399824  |
| O  | 0.491841346647  | 3.538271894363  | 2.209419433464  |
| O  | -1.979580459206 | 0.734664856442  | 2.980244117096  |
| O  | -3.217735128179 | 2.555681252405  | 3.518562444942  |
| TV | 7.743206418478  | -0.000000000000 | -0.000000000000 |
| TV | -0.534701914265 | 3.834984509360  | 0.000000000000  |
| TV | -2.932537563806 | -0.264227065170 | 3.402238665572  |

# EQ'-CO<sub>2</sub> 104

|    |                 |                 |                 |
|----|-----------------|-----------------|-----------------|
| C  | -1.334519026146 | 0.515311719968  | 0.669167335872  |
| C  | 0.067745756683  | 3.316316122996  | -1.038672254878 |
| C  | 0.517445201042  | 0.406387047194  | -0.716814866896 |
| C  | 2.390454686026  | 0.515305802995  | 0.669161853701  |
| C  | 3.792733087639  | 3.316310464293  | -1.038685897576 |
| C  | 4.242412567261  | 0.406382745877  | -0.716810916061 |
| O  | 1.071534598210  | 8.050521380840  | 0.117876177285  |
| O  | -1.751920284763 | -2.258184951645 | 1.137585354637  |
| O  | -3.102136484346 | 1.568184097279  | 1.650827934948  |
| O  | -2.406049120300 | -0.143633198029 | 0.201673793716  |
| O  | 1.318913680688  | -0.143633618241 | 0.201688032853  |
| O  | 1.248264751867  | 1.342585455394  | -1.343081011764 |
| O  | -0.570444502073 | 1.077917454783  | -0.241302331253 |
| O  | 4.973227739672  | 1.342566724223  | -1.343098584614 |
| O  | 3.154518923639  | 1.077914325697  | -0.241316508648 |
| O  | 4.796516645218  | 8.050506865430  | 0.117863367098  |
| O  | 1.973048573530  | -2.258186747904 | 1.137581213823  |
| O  | 0.622846116503  | 1.568196866834  | 1.650832965461  |
| TV | 7.449941888447  | -0.000000000000 | -0.000000000000 |
| TV | 0.473729584465  | 5.020545573366  | 0.000000000000  |
| TV | -1.880581357110 | -1.725100541474 | 2.708081466274  |

# EQ'-CO<sub>2</sub> 105

|    |                 |                 |                 |
|----|-----------------|-----------------|-----------------|
| C  | 0.173572693526  | -0.650255543641 | 3.035750643615  |
| C  | 0.256317313788  | -0.111640881490 | -0.415150248938 |
| C  | 2.370051693674  | -0.650040512417 | 3.038783848383  |
| C  | 2.452731231025  | -0.110946522423 | -0.413205325641 |
| C  | 4.566787709696  | -0.651921409764 | 3.036466148374  |
| C  | 4.649751898267  | -0.112856023370 | -0.415564494085 |
| O  | 1.342764945703  | -0.693524486557 | 0.140491550955  |
| O  | 3.540107932145  | -0.692936592534 | 0.141957323063  |
| O  | 2.358542820580  | 1.355008233957  | 1.171762216393  |
| O  | 4.557232113380  | 1.351797127154  | 1.169610950623  |
| O  | 4.661592031315  | -2.121324352594 | 1.451928029794  |
| O  | 3.479561456149  | -0.064079173521 | 2.490516116918  |
| O  | 2.466286402484  | -2.117183349192 | 1.453584319999  |
| O  | 5.737342991628  | -0.694210385905 | 0.140116317941  |
| O  | 1.283641768072  | -0.064121219713 | 2.487567076844  |
| O  | 6.753688090665  | 1.354749464240  | 1.168341774416  |
| O  | 6.859055752258  | -2.118565858959 | 1.451905357805  |
| O  | 5.675963994578  | -0.064967268865 | 2.486734398338  |
| TV | 6.590939455853  | -0.000000000000 | 0.000000000000  |
| TV | -0.547317141662 | 4.765522760567  | 0.000000000000  |
| TV | -0.045724247131 | -1.992946877442 | 3.203674887953  |

# EQ'-CO<sub>2</sub> 106

|   |                 |                 |                 |
|---|-----------------|-----------------|-----------------|
| C | -1.501437686441 | 1.552993257318  | 0.773221081558  |
| C | 1.848478903831  | 2.315008099404  | -0.904119011625 |
| C | -0.631345366826 | 3.016140525827  | -0.663906563255 |
| C | -2.842235205290 | -1.346981238194 | 3.263642878579  |
| C | 0.507687383561  | -0.584964996982 | 1.586293530906  |
| C | -1.972193313780 | 0.116153583612  | 1.826499899675  |
| O | 0.113161826345  | 5.298708781987  | -0.646365599447 |
| O | -1.774348896799 | -2.942473760995 | 1.152697026849  |
| O | -0.905485572013 | 0.353487708447  | 0.926669113577  |

|    |                 |                 |                 |
|----|-----------------|-----------------|-----------------|
| O  | -2.156436778174 | -0.909220193045 | -0.111182425746 |
| O  | -3.497215064471 | -3.809203098473 | 2.379232404073  |
| O  | 0.092809362849  | 3.341744824787  | 0.423107076154  |
| O  | -1.278544996698 | 1.887009880653  | -0.484815371789 |
| O  | -1.247977747585 | 0.441729307503  | 2.913523028325  |
| O  | -2.619334843841 | -1.012977847969 | 2.005599354518  |
| O  | -1.227555088604 | 2.398677683042  | 1.844060164691  |
| O  | -3.115103810388 | -5.842488751645 | 3.643128372198  |
| O  | -2.246214975116 | -2.546455777865 | 3.417085601743  |
| TV | 5.332963266911  | 0.000000000000  | 0.000000000001  |
| TV | -0.965556133339 | 4.006694142358  | -0.000000000000 |
| TV | -2.681540077347 | -5.799989264876 | 4.980828219877  |

# EQ'-CO<sub>2</sub> 107

|    |                 |                 |                 |
|----|-----------------|-----------------|-----------------|
| C  | -2.716842319345 | 0.993409477914  | 1.646576041820  |
| C  | 0.136513380653  | 2.889850711993  | -2.409307207696 |
| C  | -0.515266165574 | 2.953290128737  | -0.155380984022 |
| C  | -2.312323223496 | 4.377235886698  | 1.646571820846  |
| C  | 0.541029123873  | 6.273662566908  | -2.409307684460 |
| C  | -0.110722840296 | 6.337114359162  | -0.155385969910 |
| O  | 1.990128783247  | 3.972507907495  | -2.283785483036 |
| O  | -0.072838279475 | 0.282232034869  | 1.882144473984  |
| O  | -1.905497794577 | 1.495596730934  | 2.521142887744  |
| O  | -2.845558744578 | -1.354795267290 | -1.417119693559 |
| O  | -2.441037120583 | 2.029041339411  | -1.417075924954 |
| O  | 0.967300445872  | 0.721978032970  | 0.010225186208  |
| O  | -0.826508911921 | 1.909832752915  | 0.642718216879  |
| O  | 1.371808490670  | 4.105781186026  | 0.010219894703  |
| O  | -0.421928037325 | 5.293673680043  | 0.642748644926  |
| O  | 2.394665822297  | 7.356334425752  | -2.283800281428 |
| O  | 0.331670150665  | 3.666048075910  | 1.882142483795  |
| O  | -1.500980859696 | 4.879400796989  | 2.521149235890  |
| TV | 5.010835668222  | -0.000000000000 | 0.000000000000  |
| TV | 0.809048239967  | 6.767666954298  | 0.000000000000  |
| TV | -0.339743444623 | -2.199011416197 | 3.019645576614  |

# EQ'-CO<sub>2</sub> 108

|    |                 |                 |                 |
|----|-----------------|-----------------|-----------------|
| C  | 0.934355278024  | -0.205962708481 | -1.697225903684 |
| C  | 3.263980496120  | 1.851205837940  | -0.123156717238 |
| C  | 1.920426988260  | 1.385149737547  | -0.513413510374 |
| C  | 1.218528751761  | 3.237386977115  | -1.697223729465 |
| C  | 3.548180899626  | 5.294552551178  | -0.123165071440 |
| C  | 2.204626710839  | 4.828500458149  | -0.513413847920 |
| O  | 1.436969545667  | 0.659326620684  | 0.512779454167  |
| O  | -1.349590933671 | -0.465968353164 | -0.295053759917 |
| O  | 0.750660732464  | -1.045868353372 | -0.670565187616 |
| O  | -0.240779110314 | -1.278378786157 | 1.458088300313  |
| O  | 0.043396360316  | 2.164974381457  | 1.458083625017  |
| O  | -0.961698441006 | -0.505576915349 | -2.499217054649 |
| O  | -2.666100049732 | 0.661861191988  | -1.613595263345 |
| O  | -0.677525969680 | 2.937777319191  | -2.499216794396 |
| O  | -2.381924394407 | 4.105210920955  | -1.613601032288 |
| O  | 1.721159339214  | 4.102685695653  | 0.512777247056  |
| O  | -1.065417111928 | 2.977384675568  | -0.295067635481 |
| O  | 1.034825318583  | 2.397483609047  | -0.670563914496 |
| TV | 4.603276525302  | -0.000000000000 | 0.000000000000  |
| TV | 0.568366722747  | 6.886699492061  | 0.000000000000  |

|                           |                 |                 |                 |
|---------------------------|-----------------|-----------------|-----------------|
| TV                        | -0.034110751040 | -1.825082180113 | 3.284319310107  |
| # EQ'-CO <sub>2</sub> 109 |                 |                 |                 |
| C                         | -2.441340354276 | 0.467330813396  | 0.606590291500  |
| C                         | 0.722423615525  | 3.288832786776  | -2.067949437522 |
| C                         | -0.330869163660 | 1.636965147315  | -0.903792726907 |
| C                         | -2.864093543663 | -1.447305417056 | 3.064896301662  |
| C                         | 0.299688686934  | 1.374209638363  | 0.390368994101  |
| C                         | -0.753605071915 | -0.277664015659 | 1.554533391892  |
| O                         | 1.048156282623  | 5.747024849747  | 0.104572510419  |
| O                         | 0.144679756867  | 0.022109143063  | 0.641089176139  |
| O                         | -1.678358553697 | 0.755931098646  | 1.599938957633  |
| O                         | -2.468644196690 | -0.771295487244 | 0.226982270057  |
| O                         | -2.891388418957 | -2.685936494891 | 2.685293624060  |
| O                         | 0.023089909704  | 2.229138941909  | 1.219285875562  |
| O                         | -1.068576068007 | 0.555923870569  | -1.179382759878 |
| O                         | -0.399657688426 | 0.314487016705  | 3.677594997334  |
| O                         | -1.491293979272 | -1.358708466959 | 1.278932130049  |
| O                         | 0.625415067741  | 3.832399118655  | 2.562879846486  |
| O                         | -0.278014215118 | -1.892547845336 | 3.099421389218  |
| O                         | -2.101088874616 | -1.158709437452 | 4.058227607963  |
| TV                        | 4.824625693609  | 0.000000000000  | 0.000000000000  |
| TV                        | -0.697417704364 | 4.343669791287  | 0.000000000000  |
| TV                        | -0.845463791945 | -3.829270380795 | 4.916629658094  |

|                           |                 |                 |                 |
|---------------------------|-----------------|-----------------|-----------------|
| # EQ'-CO <sub>2</sub> 110 |                 |                 |                 |
| C                         | 0.768521197193  | 1.902128929154  | -4.091006912976 |
| C                         | 5.092810332818  | 1.261377708292  | -0.188658748244 |
| C                         | 3.261554383585  | 1.979880980079  | 0.883848807908  |
| C                         | 4.482691202155  | 1.902142034728  | -4.091028271484 |
| C                         | 8.806980164393  | 1.261359600209  | -0.188595970742 |
| C                         | 6.975725560296  | 1.979904696935  | 0.883847337386  |
| O                         | 2.736636449869  | 1.216825315666  | -0.101987347278 |
| O                         | 0.159595350767  | -0.609067206366 | 0.608191971510  |
| O                         | 1.025205383913  | 2.008161123366  | -1.258276185008 |
| O                         | -1.595187321203 | -2.656617180086 | 2.987685298765  |
| O                         | 2.119002943078  | -2.656604123605 | 2.987659630566  |
| O                         | -4.558733169450 | -3.887322585141 | -2.706287166251 |
| O                         | -3.635860501326 | -0.284789462062 | -1.574782836321 |
| O                         | -0.844554965094 | -3.887333900379 | -2.706332184981 |
| O                         | 0.078325084931  | -0.284808827203 | -1.574768474203 |
| O                         | 6.450802881142  | 1.216839235270  | -0.102008709645 |
| O                         | 3.873748849407  | -0.609074655472 | 0.608157204115  |
| O                         | 4.739436394869  | 2.008200951913  | -1.258408238895 |
| TV                        | 7.428355909464  | 0.000000000000  | -0.000000000000 |
| TV                        | 2.687728820396  | 3.862793088759  | 0.000000000001  |
| TV                        | 0.073552138970  | -2.031164654423 | 3.623569111708  |

|                           |                 |                |                 |
|---------------------------|-----------------|----------------|-----------------|
| # EQ'-CO <sub>2</sub> 111 |                 |                |                 |
| C                         | -1.492369937955 | 2.609672222611 | 1.165510755252  |
| C                         | -1.252122140079 | 1.802173561067 | -2.051544089249 |
| C                         | 0.440416513918  | 3.727931745618 | 0.609751564826  |
| C                         | 0.354114776042  | 1.270106269131 | 4.023848012939  |
| C                         | 0.594312877566  | 0.462570284522 | 0.806790950778  |
| C                         | 2.286902702126  | 2.388367970258 | 3.468037817571  |
| O                         | 0.012292648821  | 3.351923580083 | -0.628250739315 |
| O                         | -0.079821910737 | 0.750787859028 | 1.917545799334  |

|    |                 |                 |                 |
|----|-----------------|-----------------|-----------------|
| O  | -1.624780450072 | 1.556865496966  | 0.302813890308  |
| O  | -2.394843328740 | -4.117489420152 | -2.172354689043 |
| O  | -0.548373726271 | -5.457064948404 | 0.685953209266  |
| O  | 0.236673968498  | 1.049074201416  | -0.157690233408 |
| O  | -0.192381480359 | 2.913572505273  | 1.454605653547  |
| O  | 2.083133772184  | -0.290521538829 | 2.700601445629  |
| O  | 1.654116137058  | 1.574003504998  | 4.312890818964  |
| O  | 1.858776204744  | 2.012342187990  | 2.230045885739  |
| O  | 1.766664185049  | -0.588766951416 | 4.775830434345  |
| O  | 0.221696273334  | 0.217274585828  | 3.161178466675  |
| TV | 3.889219741943  | -0.000000000000 | 0.000000000000  |
| TV | -0.775390666038 | 4.581478592152  | -0.000000000000 |
| TV | 3.692954604251  | -2.679149279315 | 5.716641277024  |

# EQ'-CO<sub>2</sub> 112

|    |                 |                 |                 |
|----|-----------------|-----------------|-----------------|
| C  | -0.979079031864 | 0.817383945022  | 0.586580873380  |
| C  | 0.477898198370  | 2.235011995696  | -2.122325447600 |
| C  | -0.887761929860 | 2.808287989382  | -0.451024927627 |
| C  | 2.547505667501  | 0.817377293395  | 0.586567109135  |
| C  | 4.004458598794  | 2.234979254083  | -2.122329788438 |
| C  | 2.638822597708  | 2.808296056191  | -0.451011411819 |
| O  | 0.128805474830  | 5.102708947161  | 0.076617331619  |
| O  | 1.059879736894  | 0.431758535764  | 2.177224303062  |
| O  | -0.722458268252 | 1.467821034002  | 1.768167939507  |
| O  | -4.931425527248 | -3.986642271157 | -2.265083906125 |
| O  | -1.404844213065 | -3.986668156476 | -2.265105611549 |
| O  | 1.295777590756  | 3.397558482155  | 0.988655015575  |
| O  | -1.505786813752 | 1.601589422550  | -0.321573365319 |
| O  | 4.822351571997  | 3.397519667563  | 0.988631512737  |
| O  | 2.020719361212  | 1.601627177011  | -0.321508896583 |
| O  | 3.655389694890  | 5.102710910554  | 0.076590541788  |
| O  | 4.586449445796  | 0.431617944161  | 2.177256140513  |
| O  | 2.804195574456  | 1.467830330949  | 1.768148245413  |
| TV | 7.053168319476  | 0.000000000002  | 0.000000000000  |
| TV | -0.094467356252 | 4.764602175619  | 0.000000000001  |
| TV | 0.746360109592  | -2.239948486465 | 3.047336090409  |

# EQ'-CO<sub>2</sub> 113

|    |                 |                 |                 |
|----|-----------------|-----------------|-----------------|
| C  | -3.148276125659 | 2.157770834454  | 0.589274833991  |
| C  | 3.573754175659  | 1.984269700858  | -1.611375916240 |
| C  | -0.372526736879 | 2.861034134955  | -0.425422176808 |
| C  | -4.398025870411 | 0.981659116133  | 3.103992776988  |
| C  | 2.323966074733  | 0.808199292509  | 0.903323062952  |
| C  | -1.622292130099 | 1.684948121110  | 2.089282643885  |
| O  | -0.080657760052 | 2.982405329365  | 0.870259821976  |
| O  | -0.998409370764 | 1.041465845840  | 1.339970765601  |
| O  | -2.561976389837 | 2.528902001016  | 1.724930774766  |
| O  | -1.415237394458 | -2.391149063512 | -2.386259932340 |
| O  | -2.665017714529 | -3.567232120360 | 0.128446171862  |
| O  | 1.041043875200  | 0.967935560244  | 0.646826613553  |
| O  | -2.241528741575 | 1.758443452111  | -0.333363602559 |
| O  | -0.208695968632 | -0.208164912705 | 3.161536766188  |
| O  | -3.491301767053 | 0.582350517756  | 2.181336421660  |
| O  | -1.330414900462 | 1.806306712051  | 3.384966575604  |
| O  | -2.248188130747 | -0.134644456142 | 3.854695514645  |
| O  | -3.811718286747 | 1.352796854843  | 4.239643486217  |
| TV | 6.118439697517  | -0.000000000001 | -0.000000000000 |

|    |                 |                 |                |
|----|-----------------|-----------------|----------------|
| TV | -0.628573794757 | 3.359357133606  | 0.000000000001 |
| TV | -2.499521184629 | -2.352206249316 | 5.029423191596 |

# EQ'-CO<sub>2</sub> 114

|    |                 |                 |                 |
|----|-----------------|-----------------|-----------------|
| C  | 1.640358322547  | -2.556925664575 | 1.429619252727  |
| C  | -1.509577085592 | -0.377390300138 | 1.429599058578  |
| C  | 3.510133728366  | -3.784336403864 | 3.361835633367  |
| C  | 0.360134355005  | -1.604772363270 | 3.361848267204  |
| C  | 5.379761875168  | -5.011663777259 | 5.294015789702  |
| C  | 2.229896985797  | -2.832127734729 | 5.294011166362  |
| O  | -4.533256541929 | 0.857494217262  | -0.503033307430 |
| O  | -2.663604260095 | -0.369918639292 | 1.429190110265  |
| O  | 0.933399043645  | 1.805666350858  | 1.448966981611  |
| O  | 2.803183951631  | 0.578243633067  | 3.381181461346  |
| O  | 2.356106638063  | -3.776838762684 | 3.361369695191  |
| O  | 1.513504900022  | -1.601288201920 | 3.381166499842  |
| O  | 0.486329570720  | -2.549456523527 | 1.429193968278  |
| O  | -0.793888368677 | -1.597307749097 | 3.361407349633  |
| O  | -0.356195050514 | -0.373942984844 | 1.448955942764  |
| O  | 4.672803754780  | -0.649106654359 | 5.313388401546  |
| O  | 4.225728937845  | -5.004206069763 | 5.293587302850  |
| O  | 3.383278879682  | -2.828641135198 | 5.313392050785  |
| TV | 4.439427921585  | 0.000000000000  | -0.000000000000 |
| TV | -1.860343517097 | 4.359070009728  | 0.000000000000  |
| TV | 5.609104741488  | -3.682172567001 | 5.796630835039  |

# EQ'-CO<sub>2</sub> 115

|    |                 |                 |                 |
|----|-----------------|-----------------|-----------------|
| C  | 0.542223327920  | 2.120545045724  | -3.701332866511 |
| C  | 6.021358689006  | 1.213441623958  | -0.343009630303 |
| C  | 3.277633346126  | 2.012049320128  | 0.751954008379  |
| C  | 1.363577345939  | -0.139672012380 | -0.494212901957 |
| C  | 6.842399548899  | -1.046333784128 | 2.864699671314  |
| C  | 4.098894220823  | -0.247816482805 | 3.959444868474  |
| O  | 3.353723782130  | 1.323002362866  | -0.458990596448 |
| O  | -0.581315355335 | -2.216228136350 | 0.925362105510  |
| O  | 1.371740293232  | 2.045586409525  | -1.212864104709 |
| O  | -0.685135072448 | -3.070108294219 | 2.879007478787  |
| O  | 0.135948334026  | -5.330801763381 | 6.086523409685  |
| O  | -6.805048816515 | -2.149441526547 | -2.649599579793 |
| O  | -3.398161416679 | -0.302852643417 | -1.615311415790 |
| O  | -5.983790213871 | -4.409577136450 | 0.557572589633  |
| O  | -2.576824509192 | -2.562887948405 | 1.592433941877  |
| O  | 4.174743957124  | -0.936499170657 | 2.748356486069  |
| O  | 0.239926352514  | -4.475954319143 | 4.133081770624  |
| O  | 2.192235798336  | -0.214514324116 | 1.994958577426  |
| TV | 4.059397042512  | 0.000000000000  | 0.000000000000  |
| TV | 2.548992316043  | 3.881931070768  | 0.000000000001  |
| TV | 1.642757855629  | -4.520139348653 | 6.414862923981  |

# EQ'-CO<sub>2</sub> 116

|   |                 |                |                 |
|---|-----------------|----------------|-----------------|
| C | -2.735966388734 | 1.522286552988 | 0.293290003248  |
| C | 2.460378723420  | 0.591627841273 | -1.957490407726 |
| C | -0.485022924737 | 2.167400059746 | 0.765351082191  |
| C | -3.210094768414 | 1.111893661997 | 2.458735092942  |
| C | 1.986270504991  | 0.181234968382 | 0.207968748346  |
| C | -0.959148634771 | 1.756986700677 | 2.930796087816  |
| O | 1.385911430426  | 4.301943962968 | 0.137970514457  |



|    |                 |                 |                 |
|----|-----------------|-----------------|-----------------|
| O  | -0.004627601187 | 1.736304130012  | 1.981356844528  |
| O  | -3.359040160743 | 1.983547564603  | 1.421170324439  |
| O  | -6.751122865775 | -4.801920473308 | -1.388128805961 |
| O  | -7.225218008552 | -5.212297426691 | 0.777319545946  |
| O  | 3.230512731588  | 3.669382402405  | 0.988882432230  |
| O  | -1.428468822466 | 1.277811379709  | 0.436336400531  |
| O  | 2.756386974482  | 3.258987652467  | 3.154332155916  |
| O  | -1.902599382531 | 0.867409517591  | 2.601784143889  |
| O  | 0.911783776610  | 3.891555080719  | 2.303437998191  |
| O  | -0.478748587523 | 1.325901887982  | 4.146805210495  |
| O  | -3.833157772302 | 1.573145159055  | 3.586627187565  |
| TV | 5.355669328735  | 0.000000000001  | 0.000000000000  |
| TV | 0.557123338264  | 4.365555492783  | 0.000000000002  |
| TV | -0.948237322053 | -0.820787396381 | 4.330897097540  |

# EQ'-CO<sub>2</sub> 117

|    |                 |                 |                 |
|----|-----------------|-----------------|-----------------|
| C  | -2.861053421589 | 1.765462881747  | -0.037201884732 |
| C  | 4.673728859707  | 2.277482067915  | -2.120935027816 |
| C  | -0.565685695175 | 1.686261533566  | 0.459317172436  |
| C  | -4.616560573577 | 0.200030631525  | 1.988175597641  |
| C  | 2.918238706299  | 0.712036716355  | -0.095555827293 |
| C  | -2.321180959222 | 0.120819302824  | 2.484698224845  |
| O  | 1.713348597561  | 3.030353110465  | -0.265643171557 |
| O  | -1.352101884528 | -0.256988332906 | 1.611908666447  |
| O  | -3.329692988724 | 2.370909549061  | 1.013613929926  |
| O  | -1.712882120739 | -1.125494721934 | -1.110159720054 |
| O  | -3.468394981278 | -2.690948109389 | 0.915196521021  |
| O  | -0.694114380199 | 3.012601901132  | 0.672263081797  |
| O  | -1.703715505570 | 1.126756919439  | 0.037001998227  |
| O  | -2.449581771636 | 1.447160350316  | 2.697636654184  |
| O  | -3.459214180179 | -0.438668395931 | 2.062381342824  |
| O  | -0.042147917797 | 1.464923351562  | 1.759742462792  |
| O  | -3.107619890776 | -1.822410324713 | 3.637288671683  |
| O  | -5.085190393405 | 0.805476975869  | 3.038993900863  |
| TV | 6.901401943838  | 0.000000000000  | -0.000000000000 |
| TV | -1.329753237501 | 3.683491353482  | -0.000000000000 |
| TV | -3.511003913020 | -3.130871953821 | 4.050772407619  |

# EQ'-CO<sub>2</sub> 118

|   |                 |                 |                 |
|---|-----------------|-----------------|-----------------|
| C | -4.614864839537 | 1.505401826201  | 2.043137558394  |
| C | 1.978875796720  | 2.480996084569  | -1.625129599656 |
| C | -0.132081021358 | 3.037718178684  | -0.975394264819 |
| C | -4.571303486614 | 4.310569443274  | 2.176507558190  |
| C | 1.940154441358  | 5.790651438277  | -1.961050167268 |
| C | -0.303421482835 | 6.002607684757  | -0.871296810147 |
| O | 0.651422225268  | 3.936275824154  | -0.260564716791 |
| O | -0.740525623281 | 0.107708837079  | 1.246068507560  |
| O | -4.119488847812 | 1.455755468702  | 3.105217252772  |
| O | -2.670928484902 | -1.475211174826 | -1.961144910595 |
| O | -3.050028588728 | 1.682665518169  | -0.759135520220 |
| O | 4.830757757794  | 0.924515936976  | -1.069204455971 |
| O | -0.795018381009 | 2.050059863182  | -0.231225702684 |
| O | 4.654018670483  | 3.868825583280  | -1.644826984517 |
| O | -1.192236865049 | 4.976045467526  | -0.772330861747 |
| O | 0.494557968541  | 6.287739324878  | 0.137474240557  |
| O | -0.852308196993 | 3.666839540668  | 1.114525353329  |
| O | -4.474734049889 | 3.672224890477  | 3.182849181280  |

|    |                 |                 |                |
|----|-----------------|-----------------|----------------|
| TV | 5.636261199780  | 0.000000000000  | 0.000000000002 |
| TV | -0.499211679909 | 6.056589467059  | 0.000000000002 |
| TV | -1.401739178565 | -2.212352727108 | 3.011247788549 |

# EQ'-CO<sub>2</sub> 119

|    |                 |                 |                 |
|----|-----------------|-----------------|-----------------|
| C  | -2.064876484200 | 2.370299869967  | 0.654102141815  |
| C  | 2.121992392196  | 3.002794132196  | -3.944374441631 |
| C  | 0.124530080202  | 2.694648551740  | 0.767910262690  |
| C  | -2.386979812592 | 5.290201939662  | 1.486341396961  |
| C  | 0.870682538449  | 6.158257875700  | -3.178651385167 |
| C  | -1.143018450302 | 6.687489498327  | -0.039099348196 |
| O  | 0.352939512955  | 2.095176360703  | -0.446204860506 |
| O  | -0.331725231120 | 0.533250193754  | 2.391871917189  |
| O  | -3.121255309988 | 2.174557805376  | 1.482703428354  |
| O  | -1.367167914876 | -1.697928242846 | -3.564038963173 |
| O  | -1.495015692354 | 2.095070152194  | -3.202454307910 |
| O  | 1.131081447100  | -0.037545656805 | 0.469534326645  |
| O  | -0.971770820172 | 2.393214628374  | 1.425350326836  |
| O  | 0.122123223238  | 4.058848839523  | 0.557109479331  |
| O  | -1.199372260115 | 5.364250114261  | 1.641672444562  |
| O  | -1.332006200388 | 5.492021852180  | -0.586000541343 |
| O  | -2.308489385949 | 3.737294944828  | 2.805196944875  |
| O  | -3.207616366258 | 6.052280780261  | 2.153506836358  |
| TV | 4.268292506401  | 0.000000000000  | -0.000000000000 |
| TV | -1.213151602668 | 6.866392389827  | 0.000000000000  |
| TV | 0.472633800997  | -1.644503752430 | 3.535996685662  |

# EQ'-CO<sub>2</sub> 120

|    |                 |                 |                 |
|----|-----------------|-----------------|-----------------|
| C  | 0.259041046335  | -1.915262998447 | 0.656811855901  |
| C  | -2.684177453677 | -1.019455444457 | -0.263903158469 |
| C  | -0.795748325099 | -2.527097140452 | 3.419946312041  |
| C  | -3.741656603921 | -1.629570832109 | 2.499568763488  |
| C  | -1.856620633418 | -3.142318068340 | 6.183729593513  |
| C  | -4.800524509948 | -2.246075598727 | 5.261849602915  |
| O  | -2.354774145710 | 0.034648208961  | 0.473490405766  |
| O  | -3.408000158227 | -0.576649914021 | 3.235929615520  |
| O  | -0.122241813924 | 1.137318748892  | 1.834419321023  |
| O  | -1.179599248899 | 0.521350105777  | 4.598518399934  |
| O  | -1.809972283691 | -1.913210335559 | 4.084430571479  |
| O  | 0.415903372477  | -0.813952194512 | 5.447980954213  |
| O  | -0.753425257102 | -1.298691225192 | 1.322027892587  |
| O  | -4.467492628099 | -1.193489675440 | 5.997227905722  |
| O  | 1.473256611370  | -0.195448699271 | 2.680654278341  |
| O  | -2.240300813180 | -0.094412264924 | 7.361686526783  |
| O  | -2.871679018358 | -2.529827579238 | 6.847686482983  |
| O  | -0.650271465374 | -1.428632819679 | 8.210587459928  |
| TV | 3.644426119733  | 0.000000000000  | -0.000000000000 |
| TV | -1.038637161086 | 3.381204166786  | 0.000000000000  |
| TV | -3.178927230391 | -1.842737195316 | 8.289704810882  |

# EQ'-CO<sub>2</sub> 121

|   |                 |                 |                |
|---|-----------------|-----------------|----------------|
| C | -0.185768765502 | -2.800045930439 | 1.608750490054 |
| C | -2.430856701452 | -2.256569139770 | 0.984471604714 |
| C | -2.048125977205 | -4.347172485363 | 3.332507538460 |
| C | -4.293223681436 | -3.803703387775 | 2.708227844861 |
| C | -3.910476564109 | -5.894293224463 | 5.056236868964 |
| C | -6.155567805831 | -5.350830230560 | 4.431974685884 |

|    |                 |                 |                 |
|----|-----------------|-----------------|-----------------|
| O  | -1.075631144324 | 4.618924985729  | 0.487542714931  |
| O  | -2.937918816266 | 3.071798528883  | 2.211267895314  |
| O  | 0.508734537477  | 1.647129230006  | 0.757438295117  |
| O  | -1.353633680055 | 0.100010586460  | 2.481174071099  |
| O  | -3.132042068764 | -4.392714047730 | 2.603737590098  |
| O  | -1.751510506721 | -3.096267092939 | 3.789234928091  |
| O  | -1.269656629465 | -2.845536412184 | 0.879920988927  |
| O  | -4.800300356906 | 1.524672711454  | 3.935014416808  |
| O  | 0.110868617197  | -1.549143004826 | 2.065491546926  |
| O  | -3.216007093668 | -1.447075205937 | 4.204864510026  |
| O  | -4.994407864778 | -5.939879988876 | 4.327498608627  |
| O  | -3.613847597720 | -4.643390366300 | 5.512985874380  |
| TV | 4.185883784901  | -0.000000000001 | -0.000000000000 |
| TV | -0.279476555611 | 4.811731519887  | 0.000000000000  |
| TV | -5.587004894811 | -4.641388677291 | 5.171223376707  |

# EQ'-CO<sub>2</sub> 122

|    |                 |                 |                 |
|----|-----------------|-----------------|-----------------|
| C  | -0.908360105393 | 1.589089238226  | 2.514113576421  |
| C  | -3.289362448157 | 2.201952085763  | -4.675889570257 |
| C  | -1.354225130746 | 2.601639458166  | -1.005061005802 |
| C  | -1.497657690965 | 4.743448429860  | 2.514099230546  |
| C  | -3.878612662939 | 5.356180620297  | -4.675927957220 |
| C  | -1.943563344983 | 5.755886637830  | -1.005054187859 |
| O  | -0.056675162951 | 2.554289434063  | -1.244883441790 |
| O  | 0.001957073324  | 1.005525851255  | 0.468553631907  |
| O  | 0.333788508368  | 1.265975102514  | 2.500637318984  |
| O  | -2.324394466248 | -2.240808978378 | -2.978581807492 |
| O  | -2.913695048115 | 0.913480962304  | -2.978673382272 |
| O  | 2.734326023894  | 1.502729824059  | 5.568282693209  |
| O  | -1.781519000601 | 1.400031876464  | -0.709827405807 |
| O  | 2.144858559408  | 4.656973208078  | 5.568238542323  |
| O  | -2.370793333212 | 4.554265068727  | -0.709854431145 |
| O  | -0.645977166790 | 5.708598065484  | -1.244913334935 |
| O  | -0.587308032506 | 4.159668993993  | 0.468581230281  |
| O  | -0.255472266408 | 4.420346324879  | 2.500635958586  |
| TV | 3.482660751168  | -0.000000000001 | -0.000000000000 |
| TV | -1.178651438315 | 6.308467791133  | -0.000000000004 |
| TV | 2.134637203516  | -1.727882133280 | 4.701836363052  |

# EQ'-CO<sub>2</sub> 123

|   |                 |                 |                 |
|---|-----------------|-----------------|-----------------|
| C | -1.106466865651 | -1.186878157190 | 2.010110004453  |
| C | -1.678125117262 | 2.348936990126  | 1.883022654492  |
| C | -1.328504485841 | -1.190413247820 | 4.185185460764  |
| C | -1.899834032630 | 2.345385888100  | 4.058871657222  |
| C | -1.548697213587 | -1.196506921712 | 6.361938977321  |
| C | -2.120080332980 | 2.339301252457  | 6.236418524298  |
| O | -3.027258995040 | -2.099480408334 | 2.924196248021  |
| O | -3.246929125588 | -2.103994189531 | 5.100513924123  |
| O | -0.651859723161 | -1.897214838666 | 0.968062478256  |
| O | -0.873957097620 | -1.901988653665 | 3.145132588502  |
| O | -0.608669695858 | 0.011033033988  | 2.004989247288  |
| O | 0.988601471874  | -0.112664131723 | 1.886499148329  |
| O | -0.385956199212 | 0.017507645776  | -0.171336481579 |
| O | -3.467620013390 | -2.110684684397 | 7.276918967703  |
| O | 1.207157725328  | -0.106134372163 | -0.289059322252 |
| O | -1.094217640478 | -1.905779767739 | 5.320202069651  |
| O | -0.826415842804 | 0.006641967857  | 4.180379080817  |

|    |                 |                 |                 |
|----|-----------------|-----------------|-----------------|
| O  | 0.763324815764  | -0.116260315578 | 4.062350579943  |
| TV | 4.172719309264  | -0.000000000000 | -0.000000000000 |
| TV | 1.003431423937  | 3.667130526268  | 0.000000000000  |
| TV | -0.662992315916 | -0.016405035740 | 6.528526925502  |

# EQ'-CO<sub>2</sub> 124

|    |                 |                 |                 |
|----|-----------------|-----------------|-----------------|
| C  | 0.580239541592  | -0.638450946627 | -2.444641985222 |
| C  | 0.240315868200  | -0.192900266792 | 1.259368526595  |
| C  | 0.634782172955  | 2.455749528284  | -2.444814590727 |
| C  | 0.294863486678  | 2.901371288385  | 1.258249102789  |
| C  | 0.689306935343  | 5.550147939920  | -2.445557239909 |
| C  | 0.349203397517  | 5.995677875109  | 1.258917494455  |
| O  | -0.155137650299 | 0.182631902726  | 0.074725332718  |
| O  | -0.100464802695 | 3.276939464876  | 0.073576801818  |
| O  | 1.503141119434  | -0.072426712462 | -1.645094647192 |
| O  | 1.557718765070  | 3.022164021815  | -1.645699434350 |
| O  | 0.090942432685  | 1.498332382592  | -1.696401385853 |
| O  | -1.120345759278 | 4.444193461376  | 0.050196500426  |
| O  | 0.036342631838  | -1.596090122951 | -1.696679075311 |
| O  | -0.046391349454 | 6.371413870749  | 0.074429359812  |
| O  | -1.175362016374 | 1.349173140033  | 0.051158983177  |
| O  | 1.612093431274  | 6.116122334719  | -1.645580218787 |
| O  | 0.145373548873  | 4.592551997864  | -1.697617722410 |
| O  | -1.066619115531 | 7.537922989245  | 0.051187109143  |
| TV | 2.948166632462  | -0.000000000000 | 0.000000000000  |
| TV | 0.163288200588  | 9.282788470915  | 0.000000000000  |
| TV | -2.189345500987 | -0.740405192091 | 3.685948329373  |

# EQ'-CO<sub>2</sub> 125

|    |                 |                 |                 |
|----|-----------------|-----------------|-----------------|
| C  | -0.300910542758 | -0.615100873075 | 1.445814087291  |
| C  | -2.060917103357 | -1.318044793753 | 1.680299315053  |
| C  | 2.721987706562  | -0.619158387968 | 1.446579663904  |
| C  | 0.960132186721  | -1.318209290943 | 1.680439299796  |
| C  | 5.741205874800  | -0.620466847107 | 1.450307774697  |
| C  | 3.981328622148  | -1.324428373249 | 1.683809130015  |
| O  | -1.573265028458 | 1.910065322059  | -0.142680106949 |
| O  | 1.449855810041  | 1.920854222252  | -0.149029793006 |
| O  | 0.010329229079  | 0.590047711976  | 0.924777427543  |
| O  | 3.031569739733  | 0.586117118434  | 0.925246145640  |
| O  | 1.838818832406  | -1.291048416560 | 0.648069653202  |
| O  | 3.669363647625  | -2.528997805712 | 2.204738126308  |
| O  | -1.184564365436 | -1.284755265310 | 0.645974498153  |
| O  | 4.471758664362  | 1.920436656819  | -0.149081951848 |
| O  | 0.654515807655  | -2.524540358061 | 2.203591764106  |
| O  | 6.040134607518  | 0.586949420616  | 0.925701421146  |
| O  | 4.861689167225  | -1.297086989857 | 0.652777246937  |
| O  | 6.705637766764  | -2.525825018964 | 2.203485036473  |
| TV | 9.067029058991  | -0.000000000000 | 0.000000000000  |
| TV | -1.952739004703 | 4.336455076372  | -0.000000000002 |
| TV | -2.629586867266 | -2.564116689835 | 2.626942448282  |

# EQ'-CO<sub>2</sub> 126

|   |                 |                 |                |
|---|-----------------|-----------------|----------------|
| C | 0.320875036195  | -1.101036303456 | 1.143561870664 |
| C | -1.723491634626 | -1.590192038030 | 1.456495888781 |
| C | 3.711051174167  | -1.108944049552 | 1.148392864182 |
| C | 1.669777888438  | -1.592558196314 | 1.477851540273 |
| C | 7.111819650379  | -1.109865049791 | 1.138764820302 |

|    |                 |                 |                 |
|----|-----------------|-----------------|-----------------|
| C  | 5.068217728473  | -1.587612718334 | 1.462923872225  |
| O  | -2.446605921582 | 2.160587509905  | 0.383779373539  |
| O  | 0.951939103528  | 2.171332947888  | 0.367127449978  |
| O  | -1.181822004673 | 1.670671124233  | 0.746335749400  |
| O  | 2.209321242709  | 1.692923054372  | 0.745826985460  |
| O  | 2.711797681221  | -1.895853933403 | 0.685255827759  |
| O  | 4.825857660348  | -2.511077285460 | 2.350463589538  |
| O  | -0.671374155255 | -1.879793477536 | 0.662057609246  |
| O  | 4.354117398433  | 2.157104942139  | 0.396911728087  |
| O  | 1.374302626151  | -2.519964526981 | 2.344799083129  |
| O  | 5.617051884333  | 1.675675412914  | 0.757530249684  |
| O  | 6.110674430002  | -1.877396365159 | 0.660189768268  |
| O  | 8.260729065200  | -2.507193015845 | 2.352550467983  |
| TV | 10.193331111664 | -0.000000000000 | -0.000000000000 |
| TV | -3.350839085002 | 5.745706733469  | -0.000000000002 |
| TV | -2.302243340955 | -2.576497941532 | 1.743140327570  |

# EQ'-CO<sub>2</sub> 127

|    |                 |                 |                |
|----|-----------------|-----------------|----------------|
| C  | -0.197048957914 | -1.951662104577 | 0.865171714524 |
| C  | -1.672082756423 | -0.458776086684 | 1.181609450865 |
| C  | -1.846735495094 | -4.239444412721 | 2.606287057630 |
| C  | -3.320824145114 | -2.744474819899 | 2.928358592889 |
| C  | -3.502385344992 | -6.523841881351 | 4.340817770511 |
| C  | -4.975907848313 | -5.030000213413 | 4.661083553383 |
| O  | -0.490147892027 | -0.182790500471 | 1.840837220805 |
| O  | -2.123685412063 | -2.458228348121 | 3.567122517054 |
| O  | -2.012742659052 | 1.393559629166  | 2.203581290686 |
| O  | -3.632864837375 | -0.875114751034 | 3.938667325537 |
| O  | -3.048518933625 | -3.802819137811 | 2.142028392295 |
| O  | -0.868582193185 | -3.615781296614 | 2.042983943758 |
| O  | -1.387116104665 | -1.503802340963 | 0.381172341765 |
| O  | -3.784285466507 | -4.744933072741 | 5.305468412694 |
| O  | 0.798092212882  | -1.319465354343 | 0.333517111166 |
| O  | -5.296489544342 | -3.165672091664 | 5.675304441646 |
| O  | -4.706054873427 | -6.089803484198 | 3.873225709519 |
| O  | -2.528884950196 | -5.881301762322 | 3.783097467744 |
| TV | 6.749049778213  | 0.000000000001  | 0.000000000000 |
| TV | -1.758343393628 | 2.912582493916  | 0.000000000000 |
| TV | -4.958595084266 | -6.858406940740 | 5.205855195414 |

# EQ'-CO<sub>2</sub> 128

|   |                 |                 |                 |
|---|-----------------|-----------------|-----------------|
| C | 1.405486613263  | -0.829639319056 | 1.397426543933  |
| C | -3.253429382687 | -0.695043384948 | -0.740750585847 |
| C | -1.460083150058 | -0.049422507242 | 0.598346531061  |
| C | 1.853509908942  | -1.843207876365 | 4.268767815702  |
| C | -2.805404279132 | -1.708582632761 | 2.130595538338  |
| C | -1.012072196525 | -1.063002893440 | 3.469721632932  |
| O | -1.374928867246 | -0.085318857730 | -2.294663008564 |
| O | -2.579584630900 | -1.596710000675 | -1.468383036051 |
| O | 1.354504464787  | 0.526079314420  | 1.453003424529  |
| O | 2.725364116645  | 0.239383807298  | -0.214563882785 |
| O | 3.173433550594  | -0.774180540909 | 2.656740652749  |
| O | -1.441665906387 | -1.916732159943 | -3.485211135461 |
| O | 1.184686923293  | -1.308760349184 | 0.209059035872  |
| O | -0.993630967215 | -2.930230617326 | -0.613900968004 |
| O | 1.632720948192  | -2.322323969873 | 3.080399497613  |
| O | -0.926888833978 | -1.098824140154 | 0.576595054919  |

|    |                 |                 |                 |
|----|-----------------|-----------------|-----------------|
| O  | -2.131555457637 | -2.610243668835 | 1.402969523370  |
| O  | 1.802588407774  | -0.487484703533 | 4.324296216825  |
| TV | 5.162374494894  | 0.000000000000  | 0.000000000000  |
| TV | 1.033480487369  | 3.535054064026  | -0.000000000000 |
| TV | 0.896016478875  | -2.027105846407 | 5.742719324800  |

# EQ'-CO<sub>2</sub> 129

|    |                 |                 |                 |
|----|-----------------|-----------------|-----------------|
| C  | -2.657669223190 | 1.827391080566  | -0.003843602513 |
| C  | 3.999658665888  | 2.206854619268  | -2.124187721041 |
| C  | -0.531437475392 | 1.780082590451  | 0.055210202788  |
| C  | -4.627221670062 | 0.445411084081  | 2.533495749890  |
| C  | 2.030164422275  | 0.824904305288  | 0.413168406225  |
| C  | -2.501022161391 | 0.398077125041  | 2.592560162467  |
| O  | 1.459248330780  | 3.227984623060  | 0.116362809051  |
| O  | -1.461004977748 | 0.049723321239  | 1.811082022269  |
| O  | -2.678316591015 | 2.351685623771  | 1.265905792326  |
| O  | -1.873177606465 | -0.940646855131 | -1.116403181034 |
| O  | -3.842709166782 | -2.322615799916 | 1.420926862435  |
| O  | -0.576011110796 | 2.783967938268  | 0.661967672265  |
| O  | -1.564072279754 | 1.005742427110  | -0.119005009474 |
| O  | -2.545591918228 | 1.401982895645  | 3.199273595724  |
| O  | -3.533615336990 | -0.376265107647 | 2.418305908333  |
| O  | -0.510363141399 | 1.846074147628  | 2.653699306651  |
| O  | -3.430524099643 | -1.332320598893 | 4.348414441014  |
| O  | -4.647965219660 | 0.969658057758  | 3.803240910568  |
| TV | 5.790042706970  | -0.000000000000 | -0.000000000000 |
| TV | -0.774223335065 | 3.521226055252  | -0.000000000000 |
| TV | -3.939060289750 | -2.763979034852 | 5.074685400793  |

# EQ'-CO<sub>2</sub> 130

|    |                 |                 |                 |
|----|-----------------|-----------------|-----------------|
| C  | -0.087442307154 | 0.965461823458  | 0.869122311054  |
| C  | 4.944100756862  | 1.955953531023  | 1.673051185686  |
| C  | -2.247831864128 | 0.708180918685  | -0.760366018338 |
| C  | 1.301971126338  | -1.070772642592 | 2.828906033191  |
| C  | 6.333518979232  | -0.080294565201 | 3.632808973741  |
| C  | -0.858410289893 | -1.328020582275 | 1.199297386269  |
| O  | 4.047616672090  | 8.447449707446  | -0.195134470913 |
| O  | -1.549118354345 | -1.324393621236 | 0.017459576291  |
| O  | 0.489820255208  | 1.170058483404  | -0.133363784123 |
| O  | -6.915246402480 | -0.240557852701 | -0.788652790946 |
| O  | -5.525844004195 | -2.276786495360 | 1.171075382831  |
| O  | -1.858350408670 | 1.907954605774  | -0.426426397750 |
| O  | -3.159575230866 | 0.343972014367  | 0.169659191207  |
| O  | -0.468927947716 | -0.128244826365 | 1.533232324025  |
| O  | -1.770208069762 | -1.692221415233 | 2.129263773766  |
| O  | 5.437012719258  | 6.411247459453  | 1.764594894618  |
| O  | -0.159799487223 | -3.360591957008 | 1.977219955565  |
| O  | 1.879158656911  | -0.866163409347 | 1.826381919222  |
| TV | 5.710584141006  | 0.000000000000  | -0.000000000000 |
| TV | 1.641803609959  | 4.720280740262  | 0.000000000000  |
| TV | 2.778803310658  | -4.072453493933 | 3.919378955440  |

# EQ'-CO<sub>2</sub> 131

|   |                |                 |                 |
|---|----------------|-----------------|-----------------|
| C | 1.927548720597 | -0.264874797875 | -2.773886065594 |
| C | 4.968194033142 | 2.501605778813  | 0.654675036329  |
| C | 2.814942053534 | 1.579315000713  | -0.001929289604 |
| C | 3.969669295212 | 2.961217829239  | -2.773887964287 |

|    |                 |                 |                 |
|----|-----------------|-----------------|-----------------|
| C  | 7.010318447425  | 5.727700381019  | 0.654670657517  |
| C  | 4.857045360437  | 4.805410581270  | -0.001921195398 |
| O  | 2.254705885798  | 1.059212605229  | -1.140864040311 |
| O  | -2.059207809919 | -1.364706497306 | -0.135418197117 |
| O  | 0.003887454611  | -0.532222758346 | 0.001138078564  |
| O  | -1.016535639065 | -1.328895999294 | 1.822275748314  |
| O  | 1.025586746282  | 1.897204083766  | 1.822287548820  |
| O  | -3.476196236611 | -0.334872616306 | -2.405693352065 |
| O  | -1.358261162975 | -0.123997458985 | -1.732131850877 |
| O  | -1.434074954127 | 2.891228663327  | -2.405695696752 |
| O  | 0.683860756230  | 3.102099114475  | -1.732127972490 |
| O  | 4.296823197301  | 4.285310763394  | -1.140862116938 |
| O  | -0.017077777337 | 1.861367948380  | -0.135408441200 |
| O  | 2.046006363476  | 2.693852199557  | 0.001140749624  |
| TV | 4.120257450414  | -0.000000000000 | 0.000000000000  |
| TV | 4.084238825677  | 6.452178441356  | 0.000000000000  |
| TV | -1.386631273938 | -2.331318954391 | 3.885577949220  |

# EQ'-CO<sub>2</sub> 132

|    |                 |                 |                 |
|----|-----------------|-----------------|-----------------|
| C  | -2.388673825873 | 1.513420355460  | 0.341424033780  |
| C  | 1.415334055330  | 2.063612674619  | -1.718447767195 |
| C  | -0.606998441877 | 1.918694540743  | -0.914671069176 |
| C  | -2.877715824226 | 0.981442522168  | 3.410426996143  |
| C  | 0.926420346081  | 1.532301643281  | 1.350855219524  |
| C  | -1.096118926252 | 1.387436584384  | 2.154270057907  |
| O  | 0.518914243237  | 2.816389494601  | 1.033788444803  |
| O  | -0.090511405082 | 0.706824301736  | 1.528149848317  |
| O  | -1.689531130114 | 2.204273813147  | 1.253730799440  |
| O  | -1.808037573281 | -1.130518883969 | -0.521240677769 |
| O  | -2.297078644082 | -1.661978098629 | 2.548194960206  |
| O  | -0.225455760087 | 2.991120754007  | -0.129727732579 |
| O  | -1.367003886723 | 0.877918830123  | -0.398302812992 |
| O  | -0.714728915077 | 2.459537378327  | 2.939467178628  |
| O  | -1.855935286747 | 0.346391814922  | 2.670375347511  |
| O  | 0.029542151052  | 2.284099949611  | 4.102951781396  |
| O  | -0.579818080962 | 0.174239393308  | 4.597498046805  |
| O  | -2.178514037996 | 1.671716682760  | 4.322997005641  |
| TV | 4.647904212462  | 0.000000000000  | 0.000000000000  |
| TV | -0.985051373664 | 3.543830490752  | -0.000000000000 |
| TV | -0.978262744877 | -1.063696220598 | 6.138304815731  |

# EQ'-CO<sub>2</sub> 133

|   |                 |                 |                 |
|---|-----------------|-----------------|-----------------|
| C | 0.993226153670  | -0.561645207588 | 0.481436119942  |
| C | -0.809506848721 | -1.428320596049 | 1.741607452864  |
| C | 0.148962070857  | 0.407807652068  | -0.352860470491 |
| C | -0.204463740781 | 1.633700684262  | 0.481430169298  |
| C | -2.007209171186 | 0.767002006580  | 1.741632168796  |
| C | -1.048726517347 | 2.603145622518  | -0.352869987433 |
| O | 1.929996134693  | -1.435630073166 | -1.555692316662 |
| O | 1.087751861483  | -0.552709550297 | 3.874545337913  |
| O | 2.191281274390  | -0.034189777441 | 0.736168258875  |
| O | 0.376369615714  | -0.847387898560 | 1.674263071762  |
| O | -0.821324595385 | 1.347946199083  | 1.674247954777  |
| O | 0.529227543137  | -2.757886087248 | -0.662866406744 |
| O | 2.783130283943  | -1.160462804817 | 2.559506589998  |
| O | -0.668452239918 | -0.562546933398 | -0.662890528868 |
| O | 1.585434493522  | 1.034872169959  | 2.559524693822  |

|    |                 |                 |                 |
|----|-----------------|-----------------|-----------------|
| O  | 0.732339150558  | 0.759684828202  | -1.555671812936 |
| O  | -0.109955188331 | 1.642626822799  | 3.874559148391  |
| O  | 0.993594103394  | 2.161145737996  | 0.736174163502  |
| TV | 4.393231982702  | 0.000000000000  | 0.000000000000  |
| TV | -2.395380579863 | 4.390681651425  | -0.000000000000 |
| TV | -1.481090673833 | -0.299164990429 | 5.340333135056  |

# EQ'-CO<sub>2</sub> 134

|    |                 |                 |                 |
|----|-----------------|-----------------|-----------------|
| C  | -0.825016137552 | -0.817211774134 | 1.096715975916  |
| C  | 0.324779371401  | -1.818272690231 | 0.927420583237  |
| C  | 1.488028009364  | -0.818170993582 | 1.095079820227  |
| C  | 2.637863900287  | -1.819267663943 | 0.926083592217  |
| C  | 3.801492394649  | -0.818644449336 | 1.095275856508  |
| C  | 4.953462510936  | -1.817969361218 | 0.927184240292  |
| O  | 0.316449170700  | 1.842277796526  | -0.393264462458 |
| O  | 2.633685208120  | 1.840071790747  | -0.393666371324 |
| O  | 0.332960030717  | 1.332290615772  | 1.732672143246  |
| O  | 2.640908776062  | 1.331341214195  | 1.731459005249  |
| O  | 1.477538534470  | 0.108693709982  | 0.290941955778  |
| O  | 2.596315676043  | -1.097308117768 | -1.169664560859 |
| O  | -0.830447853100 | 0.109296268081  | 0.292469374017  |
| O  | 4.952132334909  | 1.842065196727  | -0.393578376087 |
| O  | 0.281221998050  | -1.095556694950 | -1.169526258095 |
| O  | 4.964870897249  | 1.331883407956  | 1.732208977290  |
| O  | 3.791969068301  | 0.108819804195  | 0.291545970981  |
| O  | 4.902644045982  | -1.095658787174 | -1.171198109521 |
| TV | 6.941672849426  | 0.000000000000  | 0.000000000000  |
| TV | 0.000022508521  | 4.076390978192  | 0.000000000000  |
| TV | -1.101182910980 | 0.693417351816  | 3.586965404585  |

# EQ'-CO<sub>2</sub> 135

|    |                 |                 |                 |
|----|-----------------|-----------------|-----------------|
| C  | -0.373212199054 | -1.454376018736 | -2.235696322263 |
| C  | 0.691240556462  | -1.877196192495 | 1.110533934614  |
| C  | -0.144617129684 | 0.100646018741  | 0.187214818174  |
| C  | -1.671392399240 | 1.607456184335  | -2.235705514707 |
| C  | -0.606943320470 | 1.184645817773  | 1.110530132467  |
| C  | -1.442805079621 | 3.162489144229  | 0.187222176142  |
| O  | 1.208588437657  | 0.090320874247  | -3.011884212659 |
| O  | 1.672277580705  | -1.258309673863 | -1.335333291082 |
| O  | -1.325974251997 | -0.568933610208 | -0.076460780446 |
| O  | -1.656729448819 | -1.583313132219 | 0.804493476999  |
| O  | -2.954900833936 | 1.478523838267  | 0.804489778969  |
| O  | -0.671750643063 | -2.198602210167 | -1.359040512992 |
| O  | 0.286343368151  | 0.435914153145  | -1.051792766598 |
| O  | -1.969935309798 | 0.863244659480  | -1.359034343620 |
| O  | -1.011860857540 | 3.497757741732  | -1.051788150751 |
| O  | -0.089592767263 | 3.152166396681  | -3.011875795182 |
| O  | 0.374085622656  | 1.803539167906  | -1.335331909931 |
| O  | -2.624173957698 | 2.492929096498  | -0.076437702415 |
| TV | 4.590923565011  | -0.000000000000 | -0.000000000000 |
| TV | -2.596380085931 | 6.123685742441  | 0.000000000000  |
| TV | -0.322916336406 | -0.735430792184 | 3.652679780966  |

# EQ'-CO<sub>2</sub> 136

|   |                 |                |                 |
|---|-----------------|----------------|-----------------|
| C | -1.696550850466 | 2.828601412952 | -0.487235985333 |
| C | 2.402691735503  | 4.951177903882 | -2.319564223093 |
| C | 1.326452421660  | 3.185755731690 | -0.605415241151 |



|    |                 |                 |                 |
|----|-----------------|-----------------|-----------------|
| C  | -2.359888578455 | 7.454967987727  | -0.487230042437 |
| C  | 1.739358757223  | 9.577540463325  | -2.319572144081 |
| C  | 0.663110656663  | 7.812125751305  | -0.605418835099 |
| O  | 0.949178733167  | 4.303197344190  | -0.628595350443 |
| O  | -0.233434906727 | -1.281579081605 | 0.473016425429  |
| O  | -2.036377156815 | -0.707415506897 | 1.835880064577  |
| O  | -3.073320027721 | -4.111306393704 | 0.948825421500  |
| O  | -3.736632112237 | 0.515076919877  | 0.948830323461  |
| O  | 0.557033794342  | 1.887792337494  | 1.349698432434  |
| O  | -1.395870958126 | 1.535414250693  | -0.129359660928 |
| O  | -0.106284670836 | 6.514151863083  | 1.349684260158  |
| O  | -2.059208652747 | 6.161781702388  | -0.129354330204 |
| O  | 0.285832108780  | 8.929558999191  | -0.628598596529 |
| O  | -0.896768821235 | 3.344787161058  | 0.473021280228  |
| O  | -2.699727706159 | 3.918962850227  | 1.835863859224  |
| TV | 4.386071108008  | -0.000000000000 | -0.000000000000 |
| TV | -1.326661539365 | 9.252735695819  | 0.000000000000  |
| TV | -2.629565616992 | -2.790989116246 | 2.634813570571  |

# EQ'-CO<sub>2</sub> 137

|    |                 |                 |                 |
|----|-----------------|-----------------|-----------------|
| C  | -2.113079721413 | 0.396196947704  | 0.263209169615  |
| C  | 0.793838501498  | 2.904511163735  | -1.228637019790 |
| C  | 0.536234857057  | 1.430642930811  | -0.918252895044 |
| C  | -3.381534433827 | -1.662399834528 | 2.858569073870  |
| C  | -0.473538204543 | 0.846260228681  | 1.368482722822  |
| C  | -0.732043606571 | -0.627716695881 | 1.677408112569  |
| O  | 1.345114013122  | 8.035413671694  | -0.136181490733 |
| O  | -0.726169965277 | -1.543210272727 | 0.946577035972  |
| O  | -1.818594365337 | 1.187411342331  | 1.293998611103  |
| O  | -3.122290660510 | -0.430031982388 | 0.442267413860  |
| O  | -4.390799979124 | -2.488442292942 | 3.038039127689  |
| O  | 0.240596800787  | 1.499517658830  | 0.376305694856  |
| O  | -1.388669847366 | 0.237249496861  | -0.637129274063 |
| O  | -1.027939582414 | -0.559210292910 | 2.971978697306  |
| O  | -2.656989554296 | -1.821887908470 | 1.958477955503  |
| O  | 0.077586975500  | 5.976451790153  | 2.461103448202  |
| O  | -1.993529170048 | -3.601249434980 | 3.545548045660  |
| O  | -3.087828574611 | -0.870058764573 | 3.888851297794  |
| TV | 4.255239673896  | -0.000000000000 | 0.000000000000  |
| TV | -0.121559980313 | 4.828606324012  | -0.000000000000 |
| TV | -2.536696847836 | -4.115356429828 | 5.193253290621  |

# EQ'-CO<sub>2</sub> 138

|   |                 |                 |                 |
|---|-----------------|-----------------|-----------------|
| C | 1.129720443874  | 0.962012548224  | -3.339777799139 |
| C | 5.454995978478  | 2.506642793033  | -0.125313668241 |
| C | 3.305378687304  | 1.445395696354  | 0.716011644153  |
| C | 0.291929065021  | 0.245050942801  | 0.457613662874  |
| C | 4.617201826273  | 1.789689182445  | 3.672066323126  |
| C | 2.467587266638  | 0.728431762751  | 4.513397892506  |
| O | 2.346065382988  | 1.442059319514  | -0.246370963134 |
| O | -1.735994894826 | -0.981095662840 | 0.287769306468  |
| O | 0.652326201827  | 0.453471953411  | -0.905069235720 |
| O | -1.309360582948 | -0.991799244215 | 2.436760773139  |
| O | -2.147146374487 | -1.708755367289 | 6.234147336544  |
| O | -4.024279421431 | -2.374882713333 | -2.435790253228 |
| O | -2.213763477418 | -1.177694602769 | -1.914904124294 |
| O | -4.862071550337 | -3.091844611588 | 1.361598984257  |

|    |                 |                 |                 |
|----|-----------------|-----------------|-----------------|
| O  | -3.051544143827 | -1.894638803066 | 1.882479284497  |
| O  | 1.508272840899  | 0.725097595062  | 3.551007820165  |
| O  | -2.573789569962 | -1.698063892054 | 4.085150458194  |
| O  | -0.185469167757 | -0.263474725876 | 2.892313625614  |
| TV | 3.933692549329  | 0.000000000000  | -0.000000000000 |
| TV | 2.042559208125  | 3.434160134711  | -0.000000000000 |
| TV | -1.675581773502 | -1.433913850566 | 7.594770001653  |

# EQ'-CO<sub>2</sub> 139

|    |                 |                 |                 |
|----|-----------------|-----------------|-----------------|
| C  | 0.380914247454  | -1.074092655840 | 2.651890539104  |
| C  | 1.520115995455  | -1.651908810941 | -0.341295910181 |
| C  | -0.989812829937 | -3.187101081702 | 0.982234637040  |
| C  | -0.417867791098 | -1.897360352185 | 4.727446085544  |
| C  | 0.757495357190  | -2.498346021269 | 2.633016307754  |
| C  | -1.578297897912 | -4.039211772480 | 3.082278438695  |
| O  | 0.813657376866  | 2.075189494733  | 0.785060622361  |
| O  | -1.290222703949 | -2.013299675610 | 0.471508596748  |
| O  | -0.265963433053 | -0.226660478776 | 0.199170471304  |
| O  | 0.245785595289  | -3.181760875209 | 1.562585231575  |
| O  | -0.473626402445 | -4.121814818491 | 3.755012963249  |
| O  | -1.628054609379 | 0.778098980282  | 1.793485466195  |
| O  | 1.284894363229  | -0.162122879237 | 1.610094737301  |
| O  | -2.102231836630 | 0.134771346521  | 4.023261168618  |
| O  | 0.609511713923  | -0.502113040111 | 3.854753236799  |
| O  | 0.049508487078  | 1.367574224969  | 2.844931045046  |
| O  | -1.765127763878 | -2.772486026393 | 2.685107631942  |
| O  | -0.772345970677 | -0.924541212142 | 2.357474884357  |
| TV | 3.839876200068  | 0.000000000000  | -0.000000000000 |
| TV | -1.445116071491 | 6.262747709412  | -0.000000000000 |
| TV | -1.275002343121 | -1.358701353373 | 4.353963974069  |

# EQ'-CO<sub>2</sub> 140

|    |                 |                 |                 |
|----|-----------------|-----------------|-----------------|
| C  | -0.316286703166 | 0.781344847387  | -0.601336258636 |
| C  | 0.225307388596  | 1.913282941174  | 0.010322798446  |
| C  | -0.295222439308 | 3.048972446449  | -0.614437884282 |
| C  | 0.234570133479  | 4.187090884315  | -0.000592520802 |
| C  | -0.274826668058 | 5.320395500741  | -0.642840936321 |
| C  | 0.264534326198  | 6.452990315543  | -0.030179664977 |
| O  | -0.236616430655 | 0.722271406001  | 2.144744678258  |
| O  | -0.221839617871 | 3.042879284888  | 2.155564909587  |
| O  | 1.120629497339  | 1.909626545782  | 0.816956782776  |
| O  | 1.130449499467  | 4.192175865967  | 0.808348152900  |
| O  | 0.177672434690  | 4.170759211839  | -2.775701704780 |
| O  | -1.188972141964 | 3.046879369408  | -1.423949546873 |
| O  | 0.175580412329  | 1.875826013418  | -2.770490025589 |
| O  | -0.212028984043 | 5.389229496122  | 2.145903210652  |
| O  | -1.206151860744 | 0.791096250197  | -1.409623163451 |
| O  | 1.155712346982  | 6.446644609284  | 0.777750814038  |
| O  | 0.197867729428  | 6.534236593162  | -2.772107028576 |
| O  | -1.169757422329 | 5.324690736371  | -1.450935042838 |
| TV | 2.734699800149  | 0.000000000000  | 0.000000000000  |
| TV | 0.032903964396  | 6.817024011632  | -0.000000000000 |
| TV | -1.344730880567 | -1.140502646872 | 5.665427859471  |

# EQ'-CO<sub>2</sub> 141

|   |                 |                |                 |
|---|-----------------|----------------|-----------------|
| C | -0.552754970592 | 3.221090683464 | 1.860168324631  |
| C | -1.687402497442 | 3.414548799433 | -1.275710987019 |

|    |                 |                 |                 |
|----|-----------------|-----------------|-----------------|
| C  | 2.077999057241  | 2.800798758638  | -0.021059626116 |
| C  | -0.058817977060 | 6.145778072060  | 1.859898550448  |
| C  | -1.193291345397 | 6.339312512152  | -1.275578842276 |
| C  | 2.572125180707  | 5.725468702118  | -0.021028962281 |
| O  | 2.491353879494  | 1.879645155997  | -0.959336497000 |
| O  | -1.690841455323 | -0.132685643141 | 0.880511318634  |
| O  | -3.164519812050 | 1.426659975255  | 1.055485461689  |
| O  | -1.754146833795 | -1.583736586622 | -0.671997296060 |
| O  | -1.260154308039 | 1.340895973024  | -0.671756994817 |
| O  | 0.822343424717  | 2.224793040343  | 0.072638572349  |
| O  | -3.101516659654 | 0.095359151245  | -0.503652852787 |
| O  | 1.316553017520  | 5.149322349938  | 0.072949823136  |
| O  | -2.607454572308 | 3.019877404747  | -0.503753372362 |
| O  | 2.985556742169  | 4.804235268587  | -0.959193063548 |
| O  | -1.196597169627 | 2.792129356662  | 0.880580271492  |
| O  | -2.670519570632 | 4.351293523240  | 1.055311829593  |
| TV | 6.780681037722  | -0.000000000000 | 0.000000000000  |
| TV | 0.988056523991  | 5.849264949471  | -0.000000000000 |
| TV | -2.349111251850 | -0.900405474773 | 2.585218812826  |

# EQ'-CO<sub>2</sub> 142

|    |                 |                 |                 |
|----|-----------------|-----------------|-----------------|
| C  | 0.627196493767  | 0.188475828957  | 0.726934847340  |
| C  | 0.654063601684  | 0.338180530176  | -0.822636145074 |
| C  | 0.035833789773  | -1.405896584507 | 2.282863826770  |
| C  | 0.062710751825  | -1.256186299197 | 0.733291779377  |
| C  | -0.555535077985 | -3.000267609219 | 3.838806111149  |
| C  | -0.528643617244 | -2.850558330162 | 2.289241325871  |
| O  | -0.242917149977 | 1.737520541848  | 2.034100883362  |
| O  | -0.834294748194 | 0.143166205797  | 3.589997464830  |
| O  | 1.714895111619  | 0.306540611237  | 1.257888760713  |
| O  | 1.123534984482  | -1.287850078638 | 2.813818550606  |
| O  | 2.626820299240  | -2.965226615858 | 1.760353294578  |
| O  | -1.080387479274 | -0.665383265543 | 2.540778345831  |
| O  | 3.218173478770  | -1.370830306710 | 0.204380643163  |
| O  | -1.425630713564 | -1.451207560430 | 5.145963587580  |
| O  | -0.489025646688 | 0.928991743512  | 0.984854285242  |
| O  | 0.532164555892  | -2.882215018171 | 4.369744805713  |
| O  | 2.035479467469  | -4.559589247369 | 3.316244001931  |
| O  | -1.671738755997 | -2.259729784238 | 4.096714628524  |
| TV | 4.244899048479  | -0.000000000000 | -0.000000000000 |
| TV | -0.827007250513 | 5.334167732012  | 0.000000000000  |
| TV | -1.774086605895 | -4.783103163832 | 4.667780881111  |

# EQ'-CO<sub>2</sub> 143

|   |                 |                 |                 |
|---|-----------------|-----------------|-----------------|
| C | -0.177467277774 | 0.229326702151  | -0.327474830213 |
| C | -0.546976034178 | 0.434350666494  | -1.707867735049 |
| C | 3.127976554057  | 3.460591752674  | -0.080043055030 |
| C | -0.554104310483 | -1.114065236465 | 1.483064828505  |
| C | -0.904337923460 | -0.920467212648 | 0.097440030270  |
| C | 2.783437284145  | 2.095381019395  | 1.721242768932  |
| O | 2.512000824052  | 2.303909991470  | 0.358815215718  |
| O | 1.510931304837  | -0.207281533834 | -1.380534742267 |
| O | 2.223275268560  | 0.520640094654  | -0.764134905093 |
| O | 0.862304252244  | 2.249074904043  | -1.373949589675 |
| O | 0.580341275259  | 0.840042088243  | 0.393806737312  |
| O | -2.561107065940 | 1.495389337265  | -1.093259770558 |
| O | -1.534177356944 | 2.421055891373  | -0.794659857113 |

|    |                 |                 |                 |
|----|-----------------|-----------------|-----------------|
| O  | -2.913284589628 | 0.130033787137  | 0.714153349263  |
| O  | -1.885282097652 | 1.054488308450  | 0.990029637779  |
| O  | 2.165853393543  | 0.939327189842  | 2.160673040836  |
| O  | 1.119276180122  | -1.610348552710 | 0.489466142485  |
| O  | 1.841954578087  | -0.855184624385 | 1.065276114176  |
| TV | 6.630463734820  | -0.000000000000 | -0.000000000000 |
| TV | -1.122489108199 | 4.293794166953  | -0.000000000000 |
| TV | -0.697781300740 | -2.726092011490 | 3.600983660611  |

# EQ'-CO<sub>2</sub> 144

|    |                 |                 |                 |
|----|-----------------|-----------------|-----------------|
| C  | -1.555341033770 | 0.252308829516  | -0.069974122991 |
| C  | -2.320180405201 | -1.014247411153 | 0.380256539558  |
| C  | -1.670380770569 | 2.663737597553  | -0.069997738401 |
| C  | -2.435179574318 | 1.397184940138  | 0.380253296470  |
| C  | -1.785360061204 | 5.075152883233  | -0.069983321339 |
| C  | -2.550185060414 | 3.808621087205  | 0.380236454333  |
| O  | -2.208039959843 | 0.460399828439  | -1.487317357220 |
| O  | -2.323084730514 | 2.871795970583  | -1.487380278160 |
| O  | -0.364258683396 | 0.165797459464  | 0.033885423087  |
| O  | -0.479287346328 | 2.577329103416  | 0.033844807867  |
| O  | -3.180495469807 | 1.207781292369  | -1.040543504434 |
| O  | -0.542610387763 | 2.302583566927  | -2.198211192620 |
| O  | -3.065491061932 | -1.203640381359 | -1.040541599958 |
| O  | -2.438067905060 | 5.283259863035  | -1.487337689172 |
| O  | -0.427599491236 | -0.108831214137 | -2.198200670295 |
| O  | -0.594277659676 | 4.988623054492  | 0.033847517262  |
| O  | -3.295482292930 | 3.619259816306  | -1.040721941712 |
| O  | -0.657624137622 | 4.714045179184  | -2.198249775488 |
| TV | 4.143261634183  | 0.000000000000  | 0.000000000000  |
| TV | -0.345023017606 | 7.234270895956  | -0.000000000000 |
| TV | -2.553293650438 | -0.949984999020 | 3.561802087792  |

# EQ'-CO<sub>2</sub> 145

|    |                 |                 |                 |
|----|-----------------|-----------------|-----------------|
| C  | -0.240129054105 | -0.413646613192 | 1.708031450412  |
| C  | -2.045287558343 | -2.618326633057 | -1.763240733661 |
| C  | 2.243742015132  | -0.413677459530 | 1.708019258103  |
| C  | 0.438589121797  | -2.618323951079 | -1.763235423594 |
| C  | 4.727628234458  | -0.413651386347 | 1.708024011677  |
| C  | 2.922471574172  | -2.618348939394 | -1.763239138659 |
| O  | -2.265039222017 | -1.914364094197 | -0.670564556737 |
| O  | 0.218882040919  | -1.914310426780 | -0.670581309905 |
| O  | 2.012787306239  | 3.429350617290  | 4.699233341207  |
| O  | 4.496632042714  | 3.429341496759  | 4.699229374192  |
| O  | 1.634969249064  | -1.508505508232 | 2.373116344938  |
| O  | 2.062887067500  | -0.225583944093 | 0.413706231834  |
| O  | -0.848886319333 | -1.508493056135 | 2.373128485073  |
| O  | 2.702758951344  | -1.914296814970 | -0.670597912912 |
| O  | -0.421003833781 | -0.225576443228 | 0.413710612458  |
| O  | 6.980522223148  | 3.429333906519  | 4.699240065016  |
| O  | 4.118901727936  | -1.508501589220 | 2.373142288995  |
| O  | 4.546737182278  | -0.225611129632 | 0.413696350062  |
| TV | 7.451639036350  | 0.000000000000  | 0.000000000000  |
| TV | 0.596528846528  | 3.341243676538  | -0.000000000000 |
| TV | 0.576334067825  | 2.318771841087  | 4.187385314226  |

# EQ'-CO<sub>2</sub> 146

|   |                 |                 |                |
|---|-----------------|-----------------|----------------|
| C | -0.018632883011 | -1.783035478201 | 1.050341824439 |
|---|-----------------|-----------------|----------------|

|    |                 |                 |                 |
|----|-----------------|-----------------|-----------------|
| C  | -0.992582065634 | -0.263054547691 | 1.205699836277  |
| C  | -1.920248359507 | 0.675589689135  | 1.049767369744  |
| C  | -2.894572092015 | 2.195140323854  | 1.205203128844  |
| C  | -3.822625289015 | 3.132792201815  | 1.048592256379  |
| C  | -4.796421333487 | 4.652743205332  | 1.201188751002  |
| O  | -1.834260721147 | -0.111018769051 | -1.082804134603 |
| O  | -3.738758226867 | 2.349755545370  | -1.081858503814 |
| O  | -1.077808203472 | 0.518249729703  | 3.336730342228  |
| O  | -2.980260765903 | 2.980770734255  | 3.336406923359  |
| O  | -2.923883411140 | 1.044181600501  | 1.868794707369  |
| O  | -1.892044680771 | 1.826431113506  | 0.385528681426  |
| O  | -1.024397683287 | -1.415678813861 | 1.867307626508  |
| O  | -5.639587217358 | 4.810380338422  | -1.084975663630 |
| O  | 0.010624635372  | -0.632657798320 | 0.386811314628  |
| O  | -4.885273636766 | 5.434782981089  | 3.338351909792  |
| O  | -4.825969455259 | 3.503073091448  | 1.866500021803  |
| O  | -3.792268509643 | 4.282467088786  | 0.383232346769  |
| TV | 3.515216102243  | -0.000000000000 | -0.000000000000 |
| TV | -5.705031082508 | 7.375798186595  | -0.000000000000 |
| TV | -0.900281917016 | -0.638826556877 | 4.026018715618  |

## (v) SiO<sub>2</sub> at 10<sup>6</sup> atm

### # EQ'-SiO<sub>2</sub> 0

|    |                 |                 |                 |
|----|-----------------|-----------------|-----------------|
| O  | -2.017403679497 | 2.696753537883  | -0.658938800705 |
| O  | 0.308385753673  | -1.022041649257 | -0.714801704241 |
| O  | 2.613230477389  | -1.351073025733 | -1.247124501559 |
| O  | -6.024039289939 | 8.115818730341  | -0.058672387604 |
| O  | -3.452419271151 | 0.876209734755  | 0.452466641731  |
| O  | -1.143788631124 | -2.837288506706 | 0.410522819483  |
| O  | 1.160435934044  | -3.169319807698 | -0.122203702328 |
| O  | -7.483900688749 | 6.286630604472  | 1.051429059275  |
| O  | -4.897565966801 | -0.947737400707 | 1.570314374493  |
| O  | -2.569550084375 | -4.665477712652 | 1.536950171551  |
| O  | -0.279449948784 | -4.997340366513 | 0.976302524878  |
| O  | -8.946219514685 | 4.464555440351  | 2.180502480651  |
| Si | 4.332594752221  | -4.027751108311 | -0.385768261547 |
| Si | 0.316212021314  | 0.667065194000  | -0.954131589178 |
| Si | 2.904188863350  | -5.862124252339 | 0.734093158637  |
| Si | -1.141224067388 | -1.153748700191 | 0.166638017828  |
| Si | 1.444180632090  | -7.670529763967 | 1.862182057620  |
| Si | -2.590755419793 | -2.979020389992 | 1.287987343629  |
| TV | 4.607642826826  | -0.000000000001 | -0.000000000003 |
| TV | -4.915183313691 | 7.575917152163  | 0.000000000002  |
| TV | -4.318891331463 | -5.471963315202 | 3.364684546275  |

### # EQ'-SiO<sub>2</sub> 1

|    |                 |                 |                 |
|----|-----------------|-----------------|-----------------|
| O  | -1.353014740350 | 3.470815484831  | -0.850431134002 |
| O  | -0.694393334570 | -0.480145408235 | 1.271057286347  |
| O  | -5.211341383933 | -4.957993415686 | 0.560893327723  |
| O  | -5.046101678896 | -2.726340083505 | 1.244112582960  |
| O  | -3.059924987918 | -3.844956873919 | 0.534831001307  |
| O  | 0.577895752058  | 2.329461375799  | -1.534113094549 |
| O  | -3.107379384386 | 6.837245853149  | -0.850431808294 |
| O  | -2.448754928017 | 2.886280680753  | 1.271059603010  |
| O  | -6.965702509727 | -1.591572629080 | 0.560896144777  |
| O  | -6.800467877005 | 0.640082017443  | 1.244115124273  |
| O  | -4.814288724819 | -0.478527699441 | 0.534832735676  |
| O  | -1.176469068471 | 5.695883286219  | -1.534107668054 |
| Si | -4.173999356482 | 0.928573201777  | -0.143430949274 |
| Si | -2.624965726885 | -4.690290165870 | 1.950824223910  |
| Si | 6.902262825825  | -1.882563465574 | 1.952236030013  |
| Si | -4.379324971628 | -1.323868707451 | 1.950821015320  |
| Si | -2.419641433549 | -2.437858076343 | -0.143435409500 |
| Si | 5.147896007694  | 1.483864402204  | 1.952239848783  |
| TV | 8.240613775669  | -0.000000000000 | -0.000000000000 |
| TV | -3.508707582052 | 6.732848833548  | -0.000000000000 |
| TV | -1.491154473324 | -5.057954123864 | 2.094521498919  |

### # EQ'-SiO<sub>2</sub> 2

|   |                 |                 |                 |
|---|-----------------|-----------------|-----------------|
| O | -2.220334682089 | 2.657763525042  | -0.636622184813 |
| O | 0.124899369270  | -1.052394645792 | -0.669170906924 |
| O | 2.405652084225  | -1.424741805685 | -1.254890858678 |
| O | -6.210613024663 | 8.020926229232  | -0.090045142641 |
| O | -3.641626155302 | 0.873934063036  | 0.493653043519  |
| O | -1.302972668960 | -2.845736767951 | 0.462379503225  |
| O | 0.973657166209  | -3.211564309735 | -0.123996808155 |

|    |                 |                 |                 |
|----|-----------------|-----------------|-----------------|
| O  | -7.637804637670 | 6.232050075825  | 1.038809057996  |
| O  | -5.069257227185 | -0.923077624407 | 1.625567543393  |
| O  | -2.732457605630 | -4.633418551376 | 1.589598814983  |
| O  | -0.446157665740 | -5.006962503456 | 1.008167164493  |
| O  | -9.060705340065 | 4.445467477017  | 2.171702792858  |
| Si | 4.084205258522  | -4.042305452077 | -0.380736777347 |
| Si | 0.093586031004  | 0.618934355168  | -0.944999154672 |
| Si | 2.661693156322  | -5.832545817547 | 0.752028521611  |
| Si | -1.330478373125 | -1.175859580162 | 0.185670541655  |
| Si | 1.234600816802  | -7.623086181661 | 1.880741702467  |
| Si | -2.758547054748 | -2.964432956641 | 1.315369509412  |
| TV | 4.560709798150  | -0.000000000001 | -0.000000000003 |
| TV | -4.849078576321 | 7.526726243151  | 0.000000000002  |
| TV | -4.276649858863 | -5.373132463569 | 3.394284896779  |

# EQ'-SiO<sub>2</sub> 3

|    |                 |                 |                 |
|----|-----------------|-----------------|-----------------|
| O  | -1.395654811958 | 1.446603358740  | -0.756465765975 |
| O  | 0.074482406444  | -0.189093980804 | -1.029051910145 |
| O  | 0.878748990421  | 1.920012522496  | -0.256703656276 |
| O  | -0.771885891866 | 3.643722278663  | -0.070599054668 |
| O  | -2.829073006363 | -0.087744556848 | 0.701867978748  |
| O  | -1.353644926692 | -1.720154490963 | 0.428864358523  |
| O  | -0.552258958657 | 0.389868091713  | 1.202207522334  |
| O  | -2.201179159776 | 2.111971420465  | 1.388439793007  |
| O  | -4.256887029420 | -1.619684601219 | 2.159711742211  |
| O  | -2.781606836998 | -3.252282637894 | 1.890024927632  |
| O  | -1.981710545233 | -1.144267209664 | 2.659945228261  |
| O  | -3.632181520920 | 0.579873963948  | 2.847887813434  |
| Si | 0.900995687368  | -1.525667099562 | -1.623183915682 |
| Si | -1.376712975967 | -0.136832189751 | -0.163590547484 |
| Si | -0.528448081410 | -3.057388564848 | -0.164052565876 |
| Si | -2.805415718118 | -1.670273650839 | 1.294537940262  |
| Si | -1.958319181633 | -4.589671599722 | 1.295451431992  |
| Si | -4.234605939639 | -3.203013262187 | 2.753540858266  |
| TV | 4.551890288730  | 0.000000000000  | -0.000000000000 |
| TV | -1.694268577412 | 5.839746200378  | 0.000000000000  |
| TV | -4.289465121889 | -4.596923664961 | 4.376531713874  |

# EQ'-SiO<sub>2</sub> 4

|    |                 |                 |                 |
|----|-----------------|-----------------|-----------------|
| O  | 2.984634651327  | 3.365880869174  | -0.631523425862 |
| O  | 0.494550800552  | -0.342047971608 | -0.631132611708 |
| O  | -8.064607416008 | -5.892998929140 | 2.915758546089  |
| O  | -5.626512913606 | -4.050951040839 | 1.513903072255  |
| O  | -6.871723265205 | -5.891877161556 | 0.798898576883  |
| O  | 1.740051983879  | 1.525787722823  | -1.347281840544 |
| O  | 2.989277355683  | 7.074437694576  | -0.631517718401 |
| O  | 0.499186219219  | 3.366513806228  | -0.631133269259 |
| O  | -8.059969187831 | -2.184441268804 | 2.915764027197  |
| O  | -5.621873145665 | -0.342393166009 | 1.513905094565  |
| O  | -6.867081437647 | -2.183317722244 | 0.798906479195  |
| O  | 1.744687915971  | 5.234340122195  | -1.347280095802 |
| Si | -3.165513295826 | 0.590593698235  | 0.083914484968  |
| Si | -0.715775194330 | 0.590115840184  | 0.083609525535  |
| Si | 5.407669383777  | -1.264947421228 | 2.199824911307  |
| Si | -0.711140556321 | 4.298673767946  | 0.083615421353  |
| Si | -3.170151480812 | -3.117963552860 | 0.083911892612  |
| Si | 5.412309188302  | 2.443605547278  | 2.199825790141  |

|    |                 |                 |                 |
|----|-----------------|-----------------|-----------------|
| TV | 7.354649100764  | -0.000000000000 | -0.000000000000 |
| TV | 0.009271484188  | 7.417110803294  | 0.000000000000  |
| TV | -3.685820636227 | -3.709340125371 | 2.116069155368  |

# EQ'-SiO<sub>2</sub> 5

|    |                 |                 |                 |
|----|-----------------|-----------------|-----------------|
| O  | -0.791277958326 | 0.932032803018  | -0.687321442276 |
| O  | -0.785151232425 | -1.395318927727 | 0.194024698463  |
| O  | -4.674629673371 | -4.512901161865 | 2.371304155127  |
| O  | -4.680580375511 | -2.183337058177 | 1.489472203114  |
| O  | -3.059246989132 | -3.848667368462 | 0.607272317261  |
| O  | 0.784646170652  | -0.717832982007 | -1.533689080537 |
| O  | -2.378346955843 | -2.019744556352 | 1.921568348503  |
| O  | -2.372225881416 | -4.347098507484 | 2.802911882749  |
| O  | -6.261702299556 | -7.464678262713 | 4.980195794060  |
| O  | -6.267658752771 | -5.135111509821 | 4.098355288205  |
| O  | -4.646322266480 | -6.800444473848 | 3.216156259439  |
| O  | -0.802428299322 | -3.669610142903 | 1.075200210443  |
| Si | -3.520116761057 | -5.562999369521 | 3.016748958189  |
| Si | -0.722260822122 | 0.179338505723  | 0.842712984161  |
| Si | 2.090232687871  | -0.969009288638 | 1.276620667011  |
| Si | -2.309338070624 | -2.772445820469 | 3.451606829605  |
| Si | -1.933042362051 | -2.611223652215 | 0.407859273807  |
| Si | 0.503156281861  | -3.920785943732 | 3.885507549623  |
| TV | 5.620349699548  | 0.000000000000  | -0.000000000000 |
| TV | -1.602533824828 | 3.938380370562  | 0.000000000000  |
| TV | -3.174150344952 | -5.903554962950 | 5.217776440549  |

# EQ'-SiO<sub>2</sub> 6

|    |                 |                 |                 |
|----|-----------------|-----------------|-----------------|
| O  | -3.659466693674 | -4.565381121958 | -4.159341042341 |
| O  | -1.874743822362 | -0.796022942956 | 0.252897141569  |
| O  | 1.835659518832  | 3.758919284767  | 1.917192653234  |
| O  | 0.043911306698  | 0.497903933725  | -0.011344255999 |
| O  | 1.870012545814  | 1.465046010252  | 1.087972521642  |
| O  | -3.698706466446 | -2.267831215331 | -3.333609358228 |
| O  | -3.662028580949 | -4.057633008731 | -1.671077560383 |
| O  | -1.877307126266 | -0.288280240932 | 2.741165059187  |
| O  | 1.833095926576  | 4.266665135071  | 4.405459218194  |
| O  | 0.041348995801  | 1.005648424758  | 2.476923411161  |
| O  | 1.867447785063  | 1.972793573214  | 3.576238167355  |
| O  | -3.701268904603 | -1.760084343709 | -0.845342806368 |
| Si | -0.915879759306 | -1.620309044648 | 3.013039022296  |
| Si | 2.787471096639  | 1.829776565746  | -0.281184041658 |
| Si | -2.765169497811 | -0.402467865234 | -1.123471075905 |
| Si | 2.784911344256  | 2.337521440561  | 2.207082745255  |
| Si | -0.913317726635 | -2.128051952521 | 0.524770889098  |
| Si | -2.767730534164 | 0.105275047579  | 1.364796420882  |
| TV | 3.702550567069  | 0.000000000000  | 0.000000000000  |
| TV | 3.642612002354  | 6.360191628479  | 0.000000000001  |
| TV | -0.005123274721 | 1.015491186747  | 4.976533525243  |

# EQ'-SiO<sub>2</sub> 7

|   |                 |                 |                 |
|---|-----------------|-----------------|-----------------|
| O | -2.301550296662 | -3.532445726693 | -3.080989114843 |
| O | -2.638738126395 | -1.214961891446 | -0.513774134021 |
| O | 0.682431714182  | 2.849837796081  | 1.174314013577  |
| O | -0.353219702398 | 0.766683929571  | 0.738510135311  |
| O | 1.992363310466  | 0.839906546001  | 0.721341004638  |
| O | -3.615398303099 | -1.518056274060 | -2.629895700213 |



|    |                 |                 |                 |
|----|-----------------|-----------------|-----------------|
| O  | -3.671898501728 | -3.295357388488 | -0.950954351071 |
| O  | -4.009050804514 | -0.977865959267 | 1.616261968240  |
| O  | -0.687912795134 | 3.086919879010  | 3.304353544204  |
| O  | -1.723550770513 | 1.003770978972  | 2.868532985680  |
| O  | 0.622023373554  | 1.077009451194  | 2.851373382982  |
| O  | -4.985746593927 | -1.280963326797 | -0.499861338202 |
| Si | -2.875048722507 | -1.858601981099 | 2.441881803717  |
| Si | 3.235415832984  | 1.650093404950  | -0.087668020708 |
| Si | -2.483866252809 | -0.460617850737 | -2.017338572187 |
| Si | 1.865081589658  | 1.887181732982  | 2.042366425809  |
| Si | -1.504706307923 | -2.095677849725 | 0.311856144410  |
| Si | -3.854219709729 | -0.223525495072 | 0.112682122501  |
| TV | 4.719558643177  | -0.000000000000 | 0.000000000000  |
| TV | 3.361946708710  | 5.840061834830  | 0.000000000000  |
| TV | -2.740672223381 | 0.474169731591  | 4.260065810022  |

# EQ'-SiO<sub>2</sub> 8

|    |                 |                 |                 |
|----|-----------------|-----------------|-----------------|
| O  | 0.293235270337  | 6.079329668904  | -0.672280574497 |
| O  | -1.792591986395 | -1.405354823949 | -0.015001981349 |
| O  | -6.565402331096 | -7.799118900777 | 2.636277390552  |
| O  | -5.120578158047 | -4.436519597431 | 0.623367772074  |
| O  | -6.173733070031 | -7.775186224779 | 0.224417342158  |
| O  | 2.925380617646  | 3.704961521140  | -0.250674755365 |
| O  | -0.868124005406 | 10.249450762528 | -0.672094628216 |
| O  | -2.953990281808 | 2.764621554073  | -0.015188117617 |
| O  | -7.726731280332 | -3.629190364715 | 2.636352029185  |
| O  | -6.281964113512 | -0.266441360523 | 0.623421241063  |
| O  | -7.335191768094 | -3.605343281121 | 0.224657052467  |
| O  | 1.763628076277  | 7.874683318470  | -0.250476560000 |
| Si | -3.666203991227 | 1.168234719492  | -0.194194713909 |
| Si | -1.500814645346 | 1.775772384673  | 0.143658367670  |
| Si | 7.090653091692  | -2.603137266477 | 2.490138930427  |
| Si | -2.662245074981 | 5.945713402694  | 0.143724980035  |
| Si | -2.504700790702 | -3.001842434896 | -0.194202546427 |
| Si | 5.929070969587  | 1.566718370179  | 2.490067632226  |
| TV | 8.127171443648  | -0.000000000000 | -0.000000000000 |
| TV | -2.322917929406 | 8.339832300799  | 0.000000000000  |
| TV | -2.886155738776 | -5.301397076496 | 1.771944697864  |

# EQ'-SiO<sub>2</sub> 9

|    |                 |                 |                 |
|----|-----------------|-----------------|-----------------|
| O  | -0.621498375589 | 1.325595126105  | -0.890334347500 |
| O  | -0.127696630197 | -1.077635618632 | -1.114467586791 |
| O  | 1.133935384235  | 0.165535599157  | 0.132439004764  |
| O  | -0.492422214744 | 3.514418845320  | -0.847687405688 |
| O  | -2.258898836641 | -0.891748614693 | 0.697524987803  |
| O  | -1.491809423893 | -3.052121633126 | -0.293872791928 |
| O  | -0.233357561556 | -1.842352177631 | 0.971641630967  |
| O  | -2.127719930102 | 1.296405066133  | 0.725942749460  |
| O  | -3.584665772948 | -2.851016189760 | 1.190063210004  |
| O  | -3.476779225085 | -5.318177930609 | 1.682973902146  |
| O  | -1.620907605468 | -3.904243497142 | 1.987024431680  |
| O  | -3.894863182416 | -0.834073105920 | 2.482479684641  |
| Si | 1.623717819762  | -0.439769847893 | -1.299907411078 |
| Si | -0.884143777684 | -0.086155481477 | 0.045113557392  |
| Si | 0.505271744326  | -2.818416074915 | -0.204435788575 |
| Si | -1.989976485390 | -2.473104909545 | 1.148442795161  |
| Si | -0.914991095727 | -5.288615475898 | 1.396934834839  |

|    |                 |                 |                 |
|----|-----------------|-----------------|-----------------|
| Si | -4.177612544711 | -3.928742090546 | 2.275776436495  |
| TV | 5.447358081561  | -0.000000000000 | 0.000000000001  |
| TV | -2.386629410646 | 5.537741205361  | -0.000000000000 |
| TV | -4.727452132462 | -6.303812368657 | 3.828241280251  |

# EQ'-SiO<sub>2</sub> 10

|    |                 |                 |                 |
|----|-----------------|-----------------|-----------------|
| O  | -1.404715220905 | 1.895816170215  | -0.907160825890 |
| O  | -0.915859733717 | -0.456175304075 | -1.142221204290 |
| O  | 0.406921515825  | 0.719280066422  | 0.094404955161  |
| O  | -1.241007762310 | 4.104143524725  | -0.886250780051 |
| O  | -3.084718286707 | -0.389621867729 | 0.652592498897  |
| O  | -2.378615740641 | -2.571413465326 | -0.308705314457 |
| O  | -1.032935257617 | -1.362059251292 | 0.896309128403  |
| O  | -2.919191701433 | 1.824089093680  | 0.694784096017  |
| O  | -4.418153182036 | -2.351191246681 | 1.161611579035  |
| O  | -4.347383905406 | -4.837267353637 | 1.577456019692  |
| O  | -2.449158903284 | -3.405839957011 | 1.995911350612  |
| O  | -4.730064222930 | -0.328775983948 | 2.407820730747  |
| Si | 0.841385188558  | 0.142321280265  | -1.344661705634 |
| Si | -1.780274483866 | 0.454675102345  | -0.032603715408 |
| Si | -0.162685182389 | -2.305226792793 | -0.185551175351 |
| Si | -2.800012272026 | -1.979401066292 | 1.121135467199  |
| Si | -1.756964731906 | -4.777234033766 | 1.344280814115  |
| Si | -5.026620615070 | -3.462508650171 | 2.221168981372  |
| TV | 5.516603710223  | -0.000000000000 | -0.000000000000 |
| TV | -2.362089659500 | 5.552107038975  | -0.000000000000 |
| TV | -4.823792092380 | -6.404841016010 | 3.786844689520  |

# EQ'-SiO<sub>2</sub> 11

|    |                 |                 |                 |
|----|-----------------|-----------------|-----------------|
| O  | -2.330900077823 | 0.526932026168  | -1.379221864867 |
| O  | 0.278305166267  | -2.604522656202 | -1.996612823510 |
| O  | 2.292755437577  | -1.760052451729 | -1.046499022249 |
| O  | -4.036265238304 | 13.799530843587 | 2.120001493184  |
| O  | -3.752870148341 | -0.913646353938 | -0.100294360485 |
| O  | -1.147921883700 | -4.045773315406 | -0.714238808077 |
| O  | 0.887481838715  | -3.187763068542 | 0.223804408059  |
| O  | -6.829937974052 | 12.390537972923 | 3.371512767575  |
| O  | -5.178510655901 | -2.354548314599 | 1.182147966303  |
| O  | -3.898680522812 | -5.429777531161 | 0.517291811968  |
| O  | -1.905264886563 | -4.596637279594 | 1.475594920457  |
| O  | -8.228485692789 | 10.961926069582 | 4.642913292783  |
| Si | 3.521842846125  | -5.584026354161 | -1.045835914828 |
| Si | -0.914412620568 | -0.168817740644 | -0.760662997870 |
| Si | 1.549145966948  | -6.124763800431 | 1.135402066860  |
| Si | -2.564971311172 | -1.660379271583 | 0.564694214515  |
| Si | -0.101534876578 | -7.616523065358 | 2.460788503096  |
| Si | -4.539041028614 | -3.892551782500 | 0.850576613873  |
| TV | 4.030271596189  | -0.000000000002 | -0.000000000003 |
| TV | -2.463136420055 | 7.647493851953  | 0.000000000001  |
| TV | -5.598242401678 | -4.264988056248 | 3.792521007237  |

# EQ'-SiO<sub>2</sub> 12

|   |                 |                 |                 |
|---|-----------------|-----------------|-----------------|
| O | -3.223131589020 | -2.510518095100 | -3.822712922742 |
| O | -1.983393409866 | -0.625371034739 | 1.263913744267  |
| O | 2.659123703693  | 1.281984836023  | -0.006776178966 |
| O | 0.050247834525  | -0.641518840317 | -0.009164343914 |
| O | 0.643276227455  | 1.277641418673  | -1.279123754849 |

|    |                 |                 |                 |
|----|-----------------|-----------------|-----------------|
| O  | -1.231344127107 | -2.494543242212 | -2.551208980393 |
| O  | -3.221860302371 | -2.507625622996 | -1.279451596908 |
| O  | -1.982104796696 | -0.622467402950 | 3.807153713064  |
| O  | 2.660378023164  | 1.284917204284  | 2.536467843202  |
| O  | 0.051533337533  | -0.638615060438 | 2.534082353419  |
| O  | 0.644550561610  | 1.280536010657  | 1.264134791054  |
| O  | -1.230069332197 | -2.491650639045 | -0.007938654727 |
| Si | -0.587839174904 | -1.561810734391 | 3.806232859163  |
| Si | -0.173354104643 | 2.277454134568  | -0.007150678842 |
| Si | -2.557456671448 | 0.285803147336  | -0.008534892035 |
| Si | -0.172066700290 | 2.280354883958  | 2.536093429684  |
| Si | -0.589121200894 | -1.564690958719 | 1.262988519260  |
| Si | -2.556165454074 | 0.288699383501  | 2.534722130113  |
| TV | 4.025842192191  | -0.000000000000 | -0.000000000000 |
| TV | 2.475652354821  | 5.696185981041  | 0.000000000001  |
| TV | 0.002545149373  | 0.005803202003  | 5.086513940860  |

# EQ'-SiO<sub>2</sub> 13

|    |                 |                 |                 |
|----|-----------------|-----------------|-----------------|
| O  | -2.234216200921 | 2.786552907750  | -1.234164560236 |
| O  | -0.782916233589 | -0.317359522335 | 0.600979295432  |
| O  | -5.201737818216 | -4.883625675132 | 0.937466628698  |
| O  | -5.023883356703 | -2.577349959477 | 0.515058655695  |
| O  | -2.962248032034 | -3.778877415827 | 0.846988145557  |
| O  | -0.306800111923 | 1.444418937947  | -0.977763238458 |
| O  | -2.824635450952 | -1.375698785737 | 0.601708197921  |
| O  | -1.373403366633 | -4.479594920018 | 2.436984749311  |
| O  | -5.792147224526 | -9.045797361958 | 2.773363788649  |
| O  | -5.614292873310 | -6.739585544740 | 2.350946473210  |
| O  | -3.552697027843 | -7.941055597515 | 2.682945361556  |
| O  | -0.897219687532 | -2.717879490205 | 0.858100887795  |
| Si | -2.826751853362 | -6.816916279648 | 1.565265961828  |
| Si | -3.004935148168 | -3.840659932430 | 2.497646811555  |
| Si | 8.161065919108  | -1.461903615607 | 1.726506927772  |
| Si | -3.595340869616 | -8.002876329964 | 4.333542129719  |
| Si | -2.236297535932 | -2.654803807954 | -0.270836626906 |
| Si | 7.570553478886  | -5.623967890255 | 3.562626105887  |
| TV | 9.646952393610  | -0.000000000000 | 0.000000000000  |
| TV | -3.137942189856 | 3.368004426020  | -0.000000000000 |
| TV | -1.180580130856 | -8.324160197678 | 3.671989031629  |

# EQ'-SiO<sub>2</sub> 14

|    |                 |                 |                 |
|----|-----------------|-----------------|-----------------|
| O  | -1.408866551973 | 4.537153500795  | -0.924345052184 |
| O  | -1.218650304973 | 0.608254930727  | -0.900724386428 |
| O  | -4.717485396213 | -7.084915215283 | 3.116480453202  |
| O  | -4.868284794871 | -4.218221043549 | 1.075471789892  |
| O  | -3.399586625105 | -6.193285322194 | 1.150822598205  |
| O  | 0.058801319047  | 2.560017419271  | -0.853878636183 |
| O  | -4.159153271698 | 8.461939499590  | -0.926102312279 |
| O  | -3.969070903242 | 4.530472658942  | -0.901465488874 |
| O  | -7.468911706467 | -3.162780611344 | 3.116531270416  |
| O  | -7.619578661428 | -0.295144074798 | 1.074832312642  |
| O  | -6.154866077126 | -2.272838707316 | 1.149431950720  |
| O  | -2.693058056625 | 6.483699014267  | -0.854375085460 |
| Si | -5.057990005109 | 1.099934167134  | 0.096170101824  |
| Si | -2.502322965703 | 1.159637994343  | 0.123053421654  |
| Si | 6.619020038240  | -3.690372313858 | 2.103215806267  |
| Si | -5.251409178172 | 5.080563726390  | 0.123523177857  |

|    |                 |                 |                 |
|----|-----------------|-----------------|-----------------|
| Si | -2.306560731695 | -2.824208903742 | 0.100358116671  |
| Si | 3.868063080453  | 0.231682385206  | 2.102968822557  |
| TV | 7.672500081724  | -0.000000000000 | 0.000000000000  |
| TV | -5.500114639351 | 7.841285365013  | -0.000000000000 |
| TV | -1.100122282983 | -4.827830718905 | 1.991082112571  |

# EQ'-SiO<sub>2</sub> 15

|    |                 |                 |                 |
|----|-----------------|-----------------|-----------------|
| O  | -1.034943370985 | 2.603940060628  | 0.010616603573  |
| O  | -0.697264758477 | -0.833873463275 | 0.430602640639  |
| O  | -6.746686357963 | -5.552458458646 | 1.573651903749  |
| O  | -6.996539817332 | -2.187356059812 | 1.323301320720  |
| O  | -3.696615607115 | -3.244394601772 | 0.908007193454  |
| O  | 0.213747507422  | 0.778618651195  | -1.122972169707 |
| O  | -3.698825812334 | 5.886310462722  | 0.010610264129  |
| O  | -3.361110586649 | 2.448520781955  | 0.430621564344  |
| O  | -9.410577028392 | -2.270102568249 | 1.573630573196  |
| O  | -9.660479611355 | 1.095016159461  | 1.323342756166  |
| O  | -6.360481139161 | 0.038006717889  | 0.908000353554  |
| O  | -2.450093982285 | 4.060995599036  | -1.122961918538 |
| Si | -5.212270721509 | 0.108850091161  | -0.401754933743 |
| Si | -2.239540030050 | -0.217400097795 | 0.499234792561  |
| Si | 9.080186097383  | -1.948063896206 | 1.742153181901  |
| Si | -4.903412741776 | 3.064947502412  | 0.499224132900  |
| Si | -2.548442418589 | -3.173493854103 | -0.401766166383 |
| Si | 6.416331512012  | 1.334330783258  | 1.742160063339  |
| TV | 10.101693955464 | 0.000000000000  | -0.000000000000 |
| TV | -5.327741611500 | 6.564724218789  | 0.000000000002  |
| TV | -1.501021498813 | -3.929889154331 | 1.794093841169  |

# EQ'-SiO<sub>2</sub> 16

|    |                 |                 |                 |
|----|-----------------|-----------------|-----------------|
| O  | -2.168289967104 | 1.969266072436  | -1.550658631595 |
| O  | -1.173007481988 | -0.736428272239 | 1.262662292306  |
| O  | -4.660555872511 | -2.893820280997 | 1.608915257849  |
| O  | -6.526490131394 | -2.646690020473 | 0.010561191610  |
| O  | -2.511901096191 | -3.766182385302 | 0.961318017618  |
| O  | 1.954435146074  | 1.983745243037  | -1.358596178702 |
| O  | -4.970354844279 | 5.209356170951  | -1.661283953848 |
| O  | -3.690663436758 | 2.384607264782  | 1.334736498198  |
| O  | -7.436010581125 | 0.165161376738  | 1.661039501138  |
| O  | -9.132359317349 | 0.649784049849  | 0.026081745951  |
| O  | -5.358201735246 | -0.730608133580 | 0.970664562955  |
| O  | -0.725182127445 | 4.992880344813  | -1.200376220250 |
| Si | -5.235427061626 | 0.176887739942  | -0.427830161180 |
| Si | -3.490184200868 | -3.627879159713 | 2.381619508738  |
| Si | 7.976763501788  | -2.276774018285 | 1.298182921732  |
| Si | -5.867302651010 | -0.544843641920 | 2.536817817110  |
| Si | -2.888041239559 | -2.981438918240 | -0.537541949836 |
| Si | 5.909010856596  | 1.429584156587  | 2.655656640626  |
| TV | 9.691833140781  | 0.000000000000  | 0.000000000000  |
| TV | -5.524866073551 | 6.279657370223  | 0.000000000000  |
| TV | -0.915118729678 | -3.595487322271 | 1.949430332274  |

# EQ'-SiO<sub>2</sub> 17

|   |                 |                 |                 |
|---|-----------------|-----------------|-----------------|
| O | -1.017073034090 | 3.233522481160  | -0.893880496950 |
| O | -0.605054582900 | -0.558858824912 | 1.280683921704  |
| O | -5.535311314170 | -4.908581923310 | 0.551966232881  |
| O | -5.176377474293 | -2.721250383872 | 1.279943598695  |

|    |                 |                 |                 |
|----|-----------------|-----------------|-----------------|
| O  | -3.243994985560 | -3.831974234155 | 0.553291075786  |
| O  | 0.912151270154  | 2.126218736586  | -1.624572547159 |
| O  | -2.574801311985 | 6.478611607842  | -0.894128074508 |
| O  | -2.162775214067 | 2.686146917118  | 1.280682021921  |
| O  | -7.093162698899 | -1.663236773892 | 0.552145114469  |
| O  | -6.734096832204 | 0.524181188325  | 1.279829129979  |
| O  | -4.801874200090 | -0.586933173309 | 0.553424976136  |
| O  | -0.645545094600 | 5.371295641459  | -1.624544576875 |
| Si | -4.053724371826 | 0.784881461742  | -0.170830931501 |
| Si | -3.644468401871 | -3.008748266340 | 2.004147444037  |
| Si | 7.054359489033  | -1.927826492609 | 2.005227064455  |
| Si | -5.202218945426 | 0.236552720548  | 2.004178287673  |
| Si | -2.496111253300 | -2.459754910858 | -0.170791743467 |
| Si | 5.496527929157  | 1.317348978091  | 2.005198363181  |
| TV | 8.412105943072  | 0.000000000000  | 0.000000000000  |
| TV | -3.115563609859 | 6.490488305491  | -0.000000000000 |
| TV | -1.875538032269 | -4.874119130720 | 2.176531901966  |

# EQ'-SiO<sub>2</sub> 18

|    |                 |                  |                 |
|----|-----------------|------------------|-----------------|
| O  | -3.268281973371 | 3.941674853071   | -3.281519020799 |
| O  | 1.370457637693  | 0.601649045455   | -0.752467252249 |
| O  | 4.239220123388  | 2.307849123400   | -1.404826185999 |
| O  | -4.775010229062 | 7.335838143119   | 0.409114237870  |
| O  | -5.157492284988 | 0.180137976755   | -1.832790332927 |
| O  | -0.518779478722 | -3.159994191089  | 0.696374637871  |
| O  | 2.350029731728  | -1.453795236811  | 0.044002240916  |
| O  | -6.664153437151 | 3.574322901007   | 1.857927398844  |
| O  | -7.046689721106 | -3.581413704811  | -0.384031880240 |
| O  | -2.407930616684 | -6.921579675794  | 2.145160763680  |
| O  | 0.460854062412  | -5.215332224272  | 1.492704460157  |
| O  | -8.553342412855 | -0.187219218744  | 3.306762909067  |
| Si | 0.271533687482  | -8.785352491040  | 0.394822226216  |
| Si | 1.849649758927  | -0.008536818269  | 0.713115525700  |
| Si | -1.617664133471 | -12.546905923519 | 1.843658325465  |
| Si | -0.039477351486 | -3.770130285121  | 2.161925129931  |
| Si | -3.506772092922 | -16.308398298624 | 3.292446957042  |
| Si | -1.928663130361 | -7.531642307687  | 3.610775925560  |
| TV | 4.353322701652  | -0.000000000001  | -0.000000000003 |
| TV | -3.709278073198 | 6.488481747958   | 0.000000000002  |
| TV | -5.667990114457 | -11.284778782613 | 4.346475928636  |

# EQ'-SiO<sub>2</sub> 19

|    |                 |                 |                 |
|----|-----------------|-----------------|-----------------|
| O  | -1.643176311559 | 1.325013823940  | -0.337559862773 |
| O  | -1.319818275638 | -1.017170313042 | 0.495891721296  |
| O  | -4.604700428081 | -4.891662609565 | 1.929121595126  |
| O  | -4.999378748147 | -2.715685957557 | 1.215394105939  |
| O  | -3.124655175772 | -3.863267048885 | 0.492213505169  |
| O  | 0.215078882459  | 0.182313990030  | -1.050915464040 |
| O  | -2.799334706418 | -2.034856913111 | 1.926344167664  |
| O  | -2.475989002820 | -4.377044013799 | 2.759787554052  |
| O  | -5.760865128164 | -8.251542516956 | 4.193023312490  |
| O  | -6.155524532264 | -6.075550969127 | 3.479302689586  |
| O  | -4.280794494247 | -7.223143067090 | 2.756119622953  |
| O  | -0.941069734817 | -3.177551524522 | 1.212980005107  |
| Si | -3.431558637997 | -5.833866687195 | 2.579582132041  |
| Si | -2.510988330885 | -0.075592525336 | -0.172211090481 |
| Si | 6.406427161386  | -1.683100623608 | 2.088219064705  |

|    |                 |                 |                |
|----|-----------------|-----------------|----------------|
| Si | -3.667149910455 | -3.435461774178 | 2.091693292533 |
| Si | -2.275403459649 | -2.473990495661 | 0.315686953839 |
| Si | 5.250246992810  | -5.042970611440 | 4.352114299448 |
| TV | 7.508567513541  | -0.000000000000 | 0.000000000000 |
| TV | -2.383319035948 | 3.496648050830  | 0.000000000000 |
| TV | -2.312310470178 | -6.719747771034 | 4.527802952432 |

# EQ'-SiO<sub>2</sub> 20

|    |                 |                 |                 |
|----|-----------------|-----------------|-----------------|
| O  | -1.704690613911 | 2.265609920128  | -1.176172535420 |
| O  | -0.449820025916 | -0.458922618897 | 0.673599971418  |
| O  | -5.446405556351 | -4.891706067447 | 1.011255591186  |
| O  | -5.092623532601 | -2.617815571782 | 0.673572796123  |
| O  | -3.124995215375 | -3.812273273949 | 1.011260701885  |
| O  | 0.262955411480  | 1.071155301257  | -0.838514632861 |
| O  | -2.771224580098 | -1.538389962392 | 0.673576502565  |
| O  | -1.516332369281 | -4.262929622357 | 2.523329651021  |
| O  | -6.512877796925 | -8.695668689757 | 2.860983317744  |
| O  | -6.159165345678 | -6.421792389799 | 2.523340297297  |
| O  | -4.191503902826 | -7.616249702967 | 2.861002592830  |
| O  | -0.803579063890 | -2.732800976240 | 1.011232913260  |
| Si | -3.185107831080 | -6.736454129648 | 1.767704242340  |
| Si | -3.778953821815 | -2.418708958929 | 1.767732447751  |
| Si | 8.421898313949  | -1.339241781388 | 1.767723076095  |
| Si | -4.845469293653 | -6.222708247162 | 3.617470746649  |
| Si | -2.118612602848 | -2.932457564984 | -0.082009645560 |
| Si | 7.355416708471  | -5.143287655645 | 3.617480023817  |
| TV | 9.879482226201  | 0.000000000000  | -0.000000000000 |
| TV | -2.915225637664 | 3.238288606387  | -0.000000000000 |
| TV | -2.133010794283 | -7.607984420588 | 3.699509914952  |

# EQ'-SiO<sub>2</sub> 21

|    |                 |                 |                 |
|----|-----------------|-----------------|-----------------|
| O  | -0.924552062819 | 2.798940683529  | -1.137368459944 |
| O  | -0.632861331020 | -0.466726045616 | 0.875447353016  |
| O  | -5.375624251585 | -5.080948559308 | 0.903759471381  |
| O  | -5.144728018635 | -2.768757765405 | 0.875429033090  |
| O  | -3.119687214302 | -3.929925701210 | 0.903770171701  |
| O  | 1.100483275691  | 1.637766761089  | -1.109041951618 |
| O  | -2.741200134548 | 6.251988308592  | -1.137376426870 |
| O  | -2.449500984015 | 2.986341342844  | 0.875434677288  |
| O  | -7.192267872071 | -1.627890897031 | 0.903755122975  |
| O  | -6.961357645383 | 0.684295897141  | 0.875442536368  |
| O  | -4.936336224729 | -0.476872557451 | 0.903758956402  |
| O  | -0.716158704499 | 5.090831842397  | -1.109050843148 |
| Si | -4.060455487941 | 0.586162784366  | -0.117209500780 |
| Si | -3.768769138478 | -2.679477809143 | 1.895601580404  |
| Si | 7.071617915906  | -1.528473288184 | 1.895607344980  |
| Si | -5.585395447790 | 0.773565169272  | 1.895605722852  |
| Si | -2.243817598745 | -2.866892944374 | -0.117195547040 |
| Si | 5.254970029840  | 1.924588351968  | 1.895599619357  |
| TV | 8.584439022035  | -0.000000000000 | 0.000000000000  |
| TV | -3.633276319451 | 6.906114212168  | -0.000000000000 |
| TV | -1.964234636056 | -4.416679533331 | 2.012809115921  |

# EQ'-SiO<sub>2</sub> 22

|   |                 |                 |                 |
|---|-----------------|-----------------|-----------------|
| O | -3.725908613989 | 1.552960986500  | -0.656925164017 |
| O | 1.869178298450  | -0.711535755139 | -0.656814326288 |
| O | -0.354079424514 | 2.041996365886  | -0.656804796390 |

|    |                 |                 |                 |
|----|-----------------|-----------------|-----------------|
| O  | -2.015250555450 | 2.928963627894  | 0.607969844701  |
| O  | -5.437089961239 | 0.175435406270  | 0.607956740640  |
| O  | 0.158112934902  | -2.089319725477 | 0.610545984757  |
| O  | -2.065117292495 | 0.664193922133  | 0.610554290710  |
| O  | -3.728429501921 | 1.548893793324  | 1.874841816250  |
| O  | -7.150271369841 | -1.204625851906 | 1.874868586496  |
| O  | -1.555446928510 | -3.466935430984 | 1.876469528872  |
| O  | -3.778687986704 | -0.713391477457 | 1.876486371736  |
| O  | -5.438150054312 | 0.172844953097  | 3.141406356482  |
| Si | 3.007189424615  | -0.956612291704 | -1.922718387492 |
| Si | -0.929349977855 | 0.421244664021  | -0.656809508247 |
| Si | 1.293888255563  | -2.332267811761 | -0.656795712352 |
| Si | -2.640804195784 | -0.956562027127 | 0.609631283393  |
| Si | -0.417560367169 | -3.710071692094 | 0.609629194425  |
| Si | -4.350182382912 | -2.336717018625 | 1.875637592467  |
| TV | 5.645095199913  | -0.000000000000 | -0.000000000000 |
| TV | -4.446477571277 | 5.507055380528  | 0.000000000000  |
| TV | -5.134117625806 | -4.133640819725 | 3.798334069892  |

# EQ'-SiO<sub>2</sub> 23

|    |                 |                 |                 |
|----|-----------------|-----------------|-----------------|
| O  | -0.752789012980 | 0.431726737183  | -2.139594325030 |
| O  | 0.520447344434  | -1.541513302894 | -1.188296222935 |
| O  | 0.517962909361  | 0.560756274124  | -0.218924817611 |
| O  | -3.310827042842 | 6.718001934947  | 0.734553412369  |
| O  | -2.026893225580 | -1.541511408409 | -1.188294459128 |
| O  | -0.755149903890 | -3.530133043567 | -0.250058903811 |
| O  | -0.755941501655 | -1.449263064337 | 0.734550398457  |
| O  | -4.583936994558 | 4.734289431548  | 1.673188542216  |
| O  | -3.302475114251 | -3.530136928590 | -0.250064569473 |
| O  | -2.027415755671 | -5.538161461954 | 0.707783793636  |
| O  | -2.029058342993 | -3.432965072097 | 1.673192029875  |
| O  | -5.858884844620 | 2.758105984611  | 2.628468276505  |
| Si | 1.792810219987  | -0.492681587474 | -0.693712957249 |
| Si | -0.754528110621 | -0.492682070324 | -0.693718570823 |
| Si | 0.518108791778  | -2.489817665323 | 0.240519451753  |
| Si | -2.029231356692 | -2.489814019893 | 0.240522369304  |
| Si | -0.754760064913 | -4.483625613892 | 1.181833249263  |
| Si | -3.302095200590 | -4.483621893532 | 1.181837779421  |
| TV | 5.094673484066  | 0.000000000000  | -0.000000000001 |
| TV | -5.102218810523 | 8.167257199027  | -0.000000000001 |
| TV | -3.821977723534 | -5.969890395362 | 2.847377081349  |

# EQ'-SiO<sub>2</sub> 24

|    |                 |                 |                 |
|----|-----------------|-----------------|-----------------|
| O  | -1.269282636266 | 2.496891893536  | -1.481432811110 |
| O  | 0.412913149801  | 0.379363990163  | -1.479683527651 |
| O  | 3.730358669472  | 2.218622158775  | -3.138293587021 |
| O  | -4.665212483418 | 7.995756425949  | 0.177861295101  |
| O  | 2.038964814930  | 2.496087436754  | -1.483704780999 |
| O  | 3.744767024692  | 0.378608104076  | -1.478327941887 |
| O  | 7.063428927651  | 2.217193057128  | -3.137904408988 |
| O  | -1.328111906883 | 7.987756552447  | 0.180887335153  |
| O  | 5.396657500478  | 2.495043241606  | -1.479313442627 |
| O  | 7.072171369574  | 0.378545242352  | -1.478840705208 |
| O  | 10.395073258158 | 2.220792918513  | -3.155305327949 |
| O  | 2.005055269535  | 7.995729756701  | 0.187755327759  |
| Si | 0.499347661242  | -8.657279932147 | 1.841110591490  |
| Si | 0.398304612424  | 0.519634913572  | 0.182362460952  |

|    |                 |                 |                 |
|----|-----------------|-----------------|-----------------|
| Si | 3.831660984234  | -8.660244341828 | 1.839440115664  |
| Si | 3.737458421166  | 0.519782935263  | 0.182204114136  |
| Si | 7.167389764430  | -8.656809899055 | 1.839667853508  |
| Si | 7.070611105197  | 0.519980092487  | 0.182883319905  |
| TV | 10.004645784288 | -0.000000000003 | -0.000000000009 |
| TV | -3.398232385834 | 7.334719150376  | 0.000000000002  |
| TV | -1.630565040555 | -3.671770341237 | 1.664063756123  |

# EQ'-SiO<sub>2</sub> 25

|    |                 |                 |                 |
|----|-----------------|-----------------|-----------------|
| O  | 0.110893676807  | 3.694889203730  | -1.359095468143 |
| O  | -1.322834942150 | -0.743775285098 | -0.149700905263 |
| O  | -7.590603864642 | -5.810163616804 | 3.305944474775  |
| O  | -6.075306926400 | -3.254419600105 | 0.374369873768  |
| O  | -6.864976689777 | -5.431845886187 | 0.874673747796  |
| O  | 3.495556400057  | 1.731560408447  | -0.391219991646 |
| O  | -1.463287035664 | 6.592712654763  | -1.358884307562 |
| O  | -2.897081557196 | 2.154087569112  | -0.149782481678 |
| O  | -9.165046505915 | -2.912400525528 | 3.305863595382  |
| O  | -7.649557452929 | -0.356352425634 | 0.374448273608  |
| O  | -8.439410033770 | -2.533602956930 | 0.874457187335  |
| O  | 1.921264314900  | 4.629654772040  | -0.391284644499 |
| Si | -4.892697081556 | 0.201751827468  | 0.121160658785  |
| Si | -1.905829474771 | 0.812822386733  | -0.040050467499 |
| Si | 9.141573561208  | -2.722749967554 | 2.240625594822  |
| Si | -3.480141063477 | 3.710401256518  | -0.039936336336 |
| Si | -3.318344524600 | -2.696508641152 | 0.121354537538  |
| Si | 7.567341400207  | 0.175329990680  | 2.240364626416  |
| TV | 10.634568777415 | 0.000000000024  | 0.000000000003  |
| TV | -3.148606747862 | 5.795945124683  | -0.000000000060 |
| TV | -3.485791101478 | -3.700717981460 | 1.974703020947  |

# EQ'-SiO<sub>2</sub> 26

|    |                 |                 |                 |
|----|-----------------|-----------------|-----------------|
| O  | -2.546152938824 | 3.892624383123  | -0.786482923699 |
| O  | -0.872896279261 | -0.153156103625 | 1.321383670704  |
| O  | -5.575210663711 | -4.402600410166 | 0.316033816300  |
| O  | -5.284715710329 | -2.265814894328 | 1.282427229460  |
| O  | -3.352899402033 | -3.397363292844 | 0.222280850697  |
| O  | -0.737667139178 | 2.680282758837  | -1.726705347239 |
| O  | -5.286725298831 | 7.048631377430  | -0.786488101576 |
| O  | -3.613448968229 | 3.002839972184  | 1.321352936898  |
| O  | -8.315782784242 | -1.246551994874 | 0.316046654557  |
| O  | -8.025280293611 | 0.890207438362  | 1.282420347207  |
| O  | -6.093481828924 | -0.241346697026 | 0.222286518515  |
| O  | -3.478224677768 | 5.836302354688  | -1.726729120116 |
| Si | -5.488658932242 | 1.272016513138  | -0.204200289937 |
| Si | -0.031774570294 | -7.760265246200 | 2.697867768782  |
| Si | 7.840299096976  | -1.653777393280 | 1.863402903865  |
| Si | -2.772331931211 | -4.604243075820 | 2.697880292802  |
| Si | -2.748108373070 | -1.883976013698 | -0.204200558515 |
| Si | 5.099726040649  | 1.502245179058  | 1.863392211736  |
| TV | 9.350060382690  | 0.000000000000  | -0.000000000000 |
| TV | -5.481133555886 | 6.312052341614  | -0.000000000000 |
| TV | -0.450841600589 | -5.015079731405 | 2.050153003129  |

# EQ'-SiO<sub>2</sub> 27

|   |                 |                 |                 |
|---|-----------------|-----------------|-----------------|
| O | -1.009534910093 | -2.380091465481 | -3.617747365315 |
| O | -1.671589254808 | -1.161896585776 | 1.622437891999  |



|    |                 |                 |                 |
|----|-----------------|-----------------|-----------------|
| O  | 2.709463715275  | 1.381842050875  | 1.622444922498  |
| O  | -0.974361714833 | 0.133749308474  | -0.098459028412 |
| O  | 0.479580566714  | 0.139879148780  | -1.896866131976 |
| O  | -3.204235217981 | -1.108220481201 | -3.617744776130 |
| O  | -0.970208537720 | -2.409995633268 | -0.098456068539 |
| O  | -1.632241962615 | -1.191797490857 | 5.141730358229  |
| O  | 2.748803254835  | 1.351942735672  | 5.141726588875  |
| O  | -0.934996601547 | 0.103826677172  | 3.420843780085  |
| O  | 0.518929140236  | 0.109973032416  | 1.622434345921  |
| O  | -3.164887064365 | -1.138128142554 | -0.098457484163 |
| Si | -0.164724794308 | -1.197260264858 | 6.040540090708  |
| Si | -0.247587687138 | 1.406278616062  | -0.998058760721 |
| Si | -2.438111535332 | 0.134416360083  | -0.998051497251 |
| Si | -0.208227092903 | 1.376369538465  | 2.521248399786  |
| Si | -0.204068953921 | -1.167363737509 | 2.521245446994  |
| Si | -2.398753538043 | 0.104506549868  | 2.521241626360  |
| TV | 4.385204123321  | 0.000000000001  | -0.000000000001 |
| TV | 2.186359122032  | 3.815602783786  | 0.000000000001  |
| TV | 0.078694024611  | -0.059805743649 | 7.038591334024  |

# EQ'-SiO<sub>2</sub> 28

|    |                 |                 |                 |
|----|-----------------|-----------------|-----------------|
| O  | -2.863538679563 | 1.999089232767  | -0.649918758724 |
| O  | 1.205194252752  | -1.364475815423 | -0.653278595303 |
| O  | -0.580007551274 | 2.015703470415  | -0.653258895543 |
| O  | -1.464216645960 | 3.686552422914  | 0.616585491208  |
| O  | -4.275810090868 | 0.306386794649  | 0.616592506942  |
| O  | -0.206532622435 | -3.056139760875 | 0.614797378277  |
| O  | -1.991713625740 | 0.324024580726  | 0.614795578432  |
| O  | -2.873798546392 | 1.995263302645  | 1.885247517715  |
| O  | -5.685409602565 | -1.384919911648 | 1.885250928900  |
| O  | -1.616652240763 | -4.747647254252 | 1.880821173763  |
| O  | -3.401841460802 | -1.367466117599 | 1.880802985621  |
| O  | -4.280654561614 | 0.306528975266  | 3.151725016830  |
| Si | 2.364257164023  | -1.373552505028 | -1.918981165596 |
| Si | -0.832851435901 | 0.317585841206  | -0.651773840129 |
| Si | 0.952332268120  | -3.062582422818 | -0.651788308689 |
| Si | -2.239597586747 | -1.375528497464 | 0.615411908603  |
| Si | -0.454410625511 | -4.755693671321 | 0.615419385458  |
| Si | -3.649690110469 | -3.066110865207 | 1.882664007534  |
| TV | 4.596806813989  | -0.000000000000 | 0.000000000000  |
| TV | -3.570383895656 | 6.760347969918  | 0.000000000000  |
| TV | -4.228744945043 | -5.072737433805 | 3.801643051250  |

# EQ'-SiO<sub>2</sub> 29

|    |                 |                 |                 |
|----|-----------------|-----------------|-----------------|
| O  | -3.225060820312 | 5.376406478832  | -0.107423650144 |
| O  | -0.951469079797 | -0.258081060926 | 1.648868956165  |
| O  | -5.330088064541 | -4.527098025747 | 0.032522853535  |
| O  | -4.945373175716 | -2.908845989699 | 1.648832662003  |
| O  | -2.045290415505 | -5.171899333030 | 0.048829703207  |
| O  | 1.031808340617  | 1.108934593596  | -1.724025202145 |
| O  | -5.837448643044 | 9.331207780877  | -0.107384729648 |
| O  | -3.563887908221 | 3.696898364080  | 1.648820390145  |
| O  | -7.942382689551 | -0.572445203803 | 0.032634925149  |
| O  | -7.557863770855 | 1.045955128511  | 1.648924032179  |
| O  | -4.657748310281 | -1.216805074945 | 0.048744743430  |
| O  | -1.580633712817 | 5.063887120693  | -1.724089981043 |
| Si | -4.277478105307 | 0.424299321651  | -0.036725242368 |

|    |                 |                 |                 |
|----|-----------------|-----------------|-----------------|
| Si | -2.052580933009 | -5.228831497757 | 1.736372008597  |
| Si | 6.060649439584  | 0.078838236572  | 1.738658530544  |
| Si | -4.665073428029 | -1.273758516756 | 1.736308855632  |
| Si | -1.665026552838 | -3.530805020891 | -0.036651055296 |
| Si | 3.448229003105  | 4.033565151938  | 1.738751060966  |
| TV | 8.634714867159  | -0.000000000002 | 0.000000000000  |
| TV | -5.225016409472 | 7.909846515440  | 0.000000000010  |
| TV | -1.047214040547 | -4.976560573513 | 1.774627874861  |

# EQ'-SiO<sub>2</sub> 30

|    |                  |                  |                 |
|----|------------------|------------------|-----------------|
| O  | -2.517375272842  | 2.069587035069   | -2.418468257133 |
| O  | 1.736022951064   | 0.873022663936   | -0.623255059866 |
| O  | 5.065785861692   | 1.493527345241   | -1.518774968077 |
| O  | -6.397441764465  | 6.522527396832   | 0.266662305784  |
| O  | -5.181230940011  | -0.814626996471  | -1.234904585445 |
| O  | -0.927840784004  | -2.011194249371  | 0.560364501149  |
| O  | 2.402069660408   | -1.390637269324  | -0.335185575789 |
| O  | -9.061312694534  | 3.638321156599   | 1.450097323424  |
| O  | -7.845081449452  | -3.698936202232  | -0.051375234629 |
| O  | -3.591612129663  | -4.895279870524  | 1.743963045257  |
| O  | -0.261769894977  | -4.274850290768  | 0.848357393603  |
| O  | -11.725133423586 | 0.754060002833   | 2.633677685090  |
| Si | -0.397477780697  | -5.798717282417  | -0.130209412735 |
| Si | 2.518464716806   | 0.104501676958   | 0.636721076053  |
| Si | -3.061268739087  | -8.682922371036  | 1.053368994712  |
| Si | -0.145372457413  | -2.779783370056  | 1.820307542407  |
| Si | -5.725102104074  | -11.567116661549 | 2.236962731055  |
| Si | -2.809223574386  | -5.663981171898  | 3.003881652975  |
| TV | 5.439380789399   | -0.000000000001  | -0.000000000003 |
| TV | -4.973545388261  | 6.229751638537   | 0.000000000002  |
| TV | -7.991628717165  | -8.652704028112  | 3.550772549538  |

# EQ'-SiO<sub>2</sub> 31

|    |                 |                 |                 |
|----|-----------------|-----------------|-----------------|
| O  | 3.979385966187  | -1.508564117641 | -0.159473659604 |
| O  | 0.747487093497  | -1.048366568138 | 2.217978749744  |
| O  | 0.517823111073  | 0.665173480760  | 0.596440945782  |
| O  | 2.911457836600  | -0.147449692778 | 1.462429599933  |
| O  | 2.681075834383  | 1.566444770961  | -0.159465955918 |
| O  | -0.550822092804 | 2.026644733882  | 2.217980734441  |
| O  | -0.780478322096 | 3.740185308990  | 0.596448717187  |
| O  | 1.613146150387  | 2.927582521970  | 1.462431254935  |
| O  | 1.382774592485  | 4.641450738308  | -0.159468279414 |
| O  | -1.849119785843 | 5.101655343582  | 2.217979310314  |
| O  | -2.078781807827 | 6.815193849190  | 0.596440514885  |
| O  | 0.314849053269  | 6.002564997480  | 1.462424669806  |
| Si | 3.434804110198  | 0.075131258598  | -0.105824366532 |
| Si | -0.007637248058 | 0.443981000940  | 2.165045861390  |
| Si | 2.136502856809  | 3.150140304117  | -0.105820710054 |
| Si | -1.305942412467 | 3.518991006790  | 2.165053624799  |
| Si | 0.838202646303  | 6.225146211565  | -0.105824365998 |
| Si | -2.604246454084 | 6.594000034271  | 2.165044236533  |
| TV | 4.336797548505  | -0.000000000000 | 0.000000000000  |
| TV | -3.894913050326 | 9.225025222813  | -0.000000000000 |
| TV | -1.275442946979 | -0.527108744111 | 3.028270047931  |

# EQ'-SiO<sub>2</sub> 32

|   |                |                |                 |
|---|----------------|----------------|-----------------|
| O | 1.505697914244 | 1.225318756075 | -0.497298904704 |
|---|----------------|----------------|-----------------|

|    |                 |                 |                 |
|----|-----------------|-----------------|-----------------|
| O  | 0.159178375891  | -0.877615114604 | -0.819018418942 |
| O  | -7.148045654456 | -3.043101542021 | 3.236775026047  |
| O  | -5.562030202058 | -2.254853532898 | 1.712330379422  |
| O  | -6.509529621576 | -4.168702589634 | 1.028999693888  |
| O  | 1.766036637365  | -0.090514437675 | -2.344947273224 |
| O  | 0.352648814497  | 3.529030013113  | -0.497106862271 |
| O  | -0.994329368724 | 1.426196153850  | -0.819081267564 |
| O  | -8.301577850060 | -0.739189785367 | 3.236683966218  |
| O  | -6.715569673602 | 0.049127737510  | 1.712237911767  |
| O  | -7.662869653838 | -1.864890703544 | 1.028953324477  |
| O  | 0.612485932264  | 2.213428578878  | -2.345070830980 |
| Si | -3.898227891898 | -0.005543278475 | -0.321151599220 |
| Si | -1.216743694289 | -0.119988908400 | -0.107797579039 |
| Si | 6.995838662958  | -1.810443446008 | 3.063030278782  |
| Si | -2.370158079524 | 2.183876315972  | -0.107968863862 |
| Si | -2.744724909982 | -2.309318756939 | -0.321193188249 |
| Si | 5.842142380552  | 0.493296178495  | 3.063238033261  |
| TV | 8.736347019024  | -0.000000000000 | 0.000000000000  |
| TV | -2.306856336746 | 4.607691506584  | -0.000000000000 |
| TV | -3.201361317660 | -1.573503921336 | 2.948290709601  |

# EQ'-SiO<sub>2</sub> 33

|    |                 |                 |                 |
|----|-----------------|-----------------|-----------------|
| O  | -0.658107472474 | 2.967894209190  | -0.342671446690 |
| O  | -0.570858336412 | -1.050051088771 | 0.648252621180  |
| O  | -6.705207908279 | -6.689096654788 | 1.745434492664  |
| O  | -6.719026771795 | -2.409255298152 | 0.977236474046  |
| O  | -3.631942662435 | -3.934859675318 | 1.134068504254  |
| O  | 0.555600095153  | 1.308161938369  | -1.440936147255 |
| O  | -2.784348169163 | 6.617981067090  | -0.342635911425 |
| O  | -2.697092944978 | 2.600056408281  | 0.648283613142  |
| O  | -8.831512222962 | -3.039097979019 | 1.745531686520  |
| O  | -8.845272346670 | 1.240878512630  | 0.977216705400  |
| O  | -5.758104914386 | -0.284813924824 | 1.134140368528  |
| O  | -1.570628581671 | 4.958275570529  | -1.440926995156 |
| Si | -5.201121785937 | 0.959003215999  | 0.152459042427  |
| Si | -2.162129217413 | -0.393377082135 | 0.442327482275  |
| Si | 8.033588251423  | -2.300614822531 | 1.669696168380  |
| Si | -4.288375298632 | 3.256703328316  | 0.442362293651  |
| Si | -3.074871666378 | -2.691074231688 | 0.152409581268  |
| Si | 5.907363863748  | 1.349478131343  | 1.669720327283  |
| TV | 9.174916647289  | -0.000000000000 | -0.000000000000 |
| TV | -4.252475963778 | 7.300215036068  | 0.000000000000  |
| TV | -2.075430368232 | -4.612375150959 | 1.806449646197  |

# EQ'-SiO<sub>2</sub> 34

|   |                 |                 |                |
|---|-----------------|-----------------|----------------|
| O | 2.907409020135  | -3.102069999244 | 0.295818861539 |
| O | -0.555325864621 | -1.270305033780 | 1.958897581275 |
| O | 0.270283113424  | 0.876571238810  | 1.217558767213 |
| O | 2.410416422679  | 0.580676418648  | 2.282446476231 |
| O | 2.192388775848  | 1.047631315604  | 0.042878157864 |
| O | -1.175263432382 | 2.600295636563  | 1.675865455346 |
| O | -0.414503401958 | 4.994707278733  | 0.902422451239 |
| O | 1.691860683788  | 4.553434289996  | 2.215581532800 |
| O | 0.955466402148  | 3.143825760161  | 0.578893157131 |
| O | -1.890198025375 | 6.749923134001  | 1.422818177939 |
| O | -1.133047273075 | 8.967500983532  | 0.835558448742 |
| O | 0.523420388253  | 6.578878800584  | 2.597532828301 |

|    |                 |                 |                 |
|----|-----------------|-----------------|-----------------|
| Si | 4.191254724932  | -2.829750566934 | -2.073690654141 |
| Si | -0.458755722681 | 1.289110375125  | 2.655355035541  |
| Si | 2.925659682540  | 0.631292029081  | -1.399849317567 |
| Si | -1.149125627676 | 4.160888368986  | 2.066363079754  |
| Si | 2.309782662114  | 4.414884767297  | -1.484707585530 |
| Si | -2.414613745945 | 7.621796905062  | 2.740078428576  |
| TV | 4.335746934995  | 0.000000000000  | -0.000000000000 |
| TV | -2.571812888251 | 10.116431532884 | 0.000000000000  |
| TV | -1.257689067996 | 1.288280216024  | 2.760041758404  |

# EQ'-SiO<sub>2</sub> 35

|    |                 |                 |                 |
|----|-----------------|-----------------|-----------------|
| O  | -1.637357464601 | 1.353293727419  | -1.347620338854 |
| O  | -0.002445056247 | -0.577603788269 | -0.937031518159 |
| O  | -0.011306576514 | 1.430652828510  | 0.200308092976  |
| O  | -1.639352277567 | 3.362134989010  | -0.218400740059 |
| O  | -1.634243714598 | 0.057173867578  | 0.923199949745  |
| O  | -0.000558736952 | -1.873006528313 | 1.333020378818  |
| O  | -0.008838138559 | 0.135749547887  | 2.469262838245  |
| O  | -1.637310758070 | 2.066211984564  | 2.058906172243  |
| O  | -1.632089333373 | -1.238406667525 | 3.193809251292  |
| O  | 0.003135209045  | -3.169191650008 | 3.611405054364  |
| O  | -0.006188876067 | -1.159007338301 | 4.740725147207  |
| O  | -1.632559184878 | 0.770228559641  | 4.329037432276  |
| Si | 1.625194831422  | -2.108792734725 | -1.805508887550 |
| Si | -0.009703562137 | -0.432146663847 | 0.649567408341  |
| Si | 1.627693338235  | -3.401369229591 | 0.471149600362  |
| Si | -0.008269667270 | -1.732395050223 | 2.920644538123  |
| Si | 1.629964012449  | -4.701256084934 | 2.741831917976  |
| Si | -0.005104374761 | -3.024848670000 | 5.198052920004  |
| TV | 3.249294695043  | 0.000000000001  | -0.000000000002 |
| TV | -3.263553196693 | 5.325799090223  | 0.000000000001  |
| TV | 0.008062574306  | -3.886146263975 | 6.820991897105  |

# EQ'-SiO<sub>2</sub> 36

|    |                 |                 |                 |
|----|-----------------|-----------------|-----------------|
| O  | -1.399091551351 | 1.095973965588  | -0.661331854154 |
| O  | -0.996071510564 | -1.168498033190 | 0.248346640371  |
| O  | -4.356862449327 | -4.903715609712 | 2.522037518652  |
| O  | -4.713310917733 | -2.567576305249 | 1.609920983448  |
| O  | -2.862734575549 | -3.950258515351 | 0.707568915465  |
| O  | 0.357317113363  | -0.248847529991 | -1.432568234699 |
| O  | -3.603777972986 | 4.678148352144  | -0.661596011143 |
| O  | -3.201044777492 | 2.413945178261  | 0.248022656186  |
| O  | -6.562049767873 | -1.321422332020 | 2.522157602213  |
| O  | -6.917856898304 | 1.014227774137  | 1.610561379435  |
| O  | -5.067491439691 | -0.367898969628 | 0.707437144069  |
| O  | -1.847340743223 | 3.333517109417  | -1.433428118056 |
| Si | -4.132632875371 | 1.053450206979  | 0.450678595716  |
| Si | -0.213874453512 | 0.281116612352  | 0.190010432666  |
| Si | 2.560306060389  | -1.176497848943 | 1.351498070236  |
| Si | -2.418613849667 | 3.863369575678  | 0.189624057413  |
| Si | -1.927711584315 | -2.528940430000 | 0.451195988987  |
| Si | 0.355310954569  | 2.405451093238  | 1.351833093717  |
| TV | 6.304622568739  | 0.000000000000  | 0.000000000000  |
| TV | -4.409840364217 | 7.164330858424  | 0.000000000000  |
| TV | -1.024988542725 | -3.079718751091 | 2.664202748220  |

# EQ'-SiO<sub>2</sub> 37

|    |                 |                 |                 |
|----|-----------------|-----------------|-----------------|
| O  | 0.144823066592  | 0.755542926133  | -0.558912176236 |
| O  | -0.592474857131 | -1.381890102942 | -0.036782089512 |
| O  | -7.257373152526 | -4.933487949538 | 2.355250389579  |
| O  | -6.491011262935 | -2.725346615332 | 1.666543885757  |
| O  | -5.286068628114 | -4.753174428352 | 1.144352575418  |
| O  | 1.379548559644  | -1.201534769497 | -1.246576712401 |
| O  | -0.323078001399 | 4.921031037488  | -0.558938881496 |
| O  | -1.060442607692 | 2.783612895615  | -0.036783938699 |
| O  | -7.725343562932 | -0.768000598516 | 2.355264763280  |
| O  | -6.958962579337 | 1.440152327707  | 1.666552475950  |
| O  | -5.754021919903 | -0.587673214223 | 1.144332790182  |
| O  | 0.911573417330  | 2.963938016014  | -1.246541950895 |
| Si | -3.406684367116 | 1.097718713954  | 0.553922441138  |
| Si | -0.275301885810 | 0.021003106923  | 0.907294567971  |
| Si | 7.599404083108  | 2.174083162556  | 0.200899530534  |
| Si | -0.743189331589 | 4.186493674080  | 0.907288691431  |
| Si | -2.938733130109 | -3.067773585618 | 0.553947322984  |
| Si | 7.131514777627  | 6.339550829190  | 0.200855175595  |
| TV | 7.069196256052  | -0.000000000006 | 0.000000000001  |
| TV | -0.935867128116 | 8.330972147234  | 0.000000000004  |
| TV | -2.771227930315 | -2.470439416099 | 2.051257527799  |

# EQ'-SiO<sub>2</sub> 38

|    |                 |                 |                 |
|----|-----------------|-----------------|-----------------|
| O  | 1.035553304762  | 3.280580709191  | -1.214442755815 |
| O  | 0.938006892764  | -0.917418733070 | 0.038039914641  |
| O  | -5.483199157261 | -6.175983305640 | 2.998784575281  |
| O  | -3.514334935431 | -3.457688656207 | 2.239870706094  |
| O  | -3.604067957525 | -5.995439572203 | 1.927388284732  |
| O  | 1.356292557524  | 0.570767107619  | -1.789886633146 |
| O  | -1.138111263134 | 6.968824656820  | -1.209351101087 |
| O  | -1.227762384415 | 2.784667191009  | 0.037738910005  |
| O  | -7.657683436430 | -2.476968843422 | 2.987385388226  |
| O  | -5.675647371423 | 0.241707994883  | 2.245771970268  |
| O  | -5.768497055352 | -2.298453007820 | 1.929508954979  |
| O  | -0.813694731061 | 4.269829595600  | -1.783529288229 |
| Si | -4.337013288533 | 0.404228899016  | -0.301397867522 |
| Si | -1.907167030078 | 1.921077890282  | -1.498989408103 |
| Si | -0.404127610663 | -1.071454961233 | 2.585023830387  |
| Si | -4.076878611356 | 5.619992593030  | -1.501001950495 |
| Si | -2.168966859363 | -3.296846141097 | -0.303129236754 |
| Si | -2.572084129583 | 2.627401014385  | 2.584184567081  |
| TV | 6.201909153238  | -0.000000000000 | -0.000000000000 |
| TV | -4.330372171308 | 7.397028001931  | -0.000000000000 |
| TV | -2.480531075262 | -4.107431314997 | 2.637442809471  |

# EQ'-SiO<sub>2</sub> 39

|   |                  |                 |                 |
|---|------------------|-----------------|-----------------|
| O | -0.188290261097  | 3.127975728356  | 0.270442344469  |
| O | -0.833419122482  | -0.974815788038 | 1.306197600091  |
| O | -8.812882557155  | -5.076381407522 | -0.117118199001 |
| O | -5.713209429219  | -3.521493669995 | 1.062817427028  |
| O | -3.869222545221  | -2.497800484249 | 0.094042383685  |
| O | 1.176775227659   | 1.935154957660  | -1.222676968529 |
| O | -1.789354803227  | 6.081099629976  | 0.270404869698  |
| O | -2.434173699419  | 1.978475502682  | 1.306295522303  |
| O | -10.413959445870 | -2.123269400283 | -0.117115164402 |
| O | -7.314330754508  | -0.568384442989 | 1.062763197319  |
| O | -5.470253408659  | 0.455177572651  | 0.094047171912  |

|    |                 |                 |                 |
|----|-----------------|-----------------|-----------------|
| O  | -0.424285117702 | 4.888292216621  | -1.222641840190 |
| Si | -4.029695026075 | 1.120467246391  | 0.454475037330  |
| Si | -4.205943830699 | -2.703133877254 | 1.730872351280  |
| Si | 10.876431708180 | -2.498783694483 | 1.406885929257  |
| Si | -5.807027601304 | 0.249953938103  | 1.730887259976  |
| Si | -2.428590241870 | -1.832617392330 | 0.454517312741  |
| Si | 9.275340272593  | 0.454378085656  | 1.406872625480  |
| TV | 11.000128942978 | 0.000000000000  | 0.000000000000  |
| TV | -3.202110810515 | 5.906219428384  | -0.000000000000 |
| TV | -2.619998086206 | -5.139195630360 | 1.867436514065  |

# EQ'-SiO<sub>2</sub> 40

|    |                 |                 |                 |
|----|-----------------|-----------------|-----------------|
| O  | -1.988265678864 | 2.603691791068  | 0.171020482419  |
| O  | 0.636549379325  | -1.039378169406 | -0.505646211506 |
| O  | 1.948355639036  | -2.133080929890 | -1.967580358098 |
| O  | -3.298866780212 | 8.967999729444  | -0.188099486068 |
| O  | -3.306052605637 | 1.438659917896  | 2.017621043782  |
| O  | -0.676237679931 | -2.208400341494 | 1.336994354075  |
| O  | 0.635252776299  | -3.299510578479 | -0.125594117257 |
| O  | -4.614480793514 | 7.798955527197  | 1.652070740725  |
| O  | -4.619543505942 | 0.272990056701  | 3.858426868000  |
| O  | -1.992587873502 | -3.373147773521 | 3.181425995289  |
| O  | -0.680396155688 | -4.465018856611 | 1.716603601367  |
| O  | -5.928078004779 | 6.634994187011  | 3.493732683642  |
| Si | 1.948540783968  | -4.416840778566 | 0.024998122403  |
| Si | 0.636922508831  | 0.477531579536  | -1.264111436925 |
| Si | 0.630370566350  | -5.583218288874 | 1.867886602573  |
| Si | -0.678111121831 | -0.690972819014 | 0.577141337055  |
| Si | -0.682816891581 | -6.748031828220 | 3.711894130454  |
| Si | -1.990663617771 | -1.857830925576 | 2.418846201290  |
| TV | 2.624495434396  | -0.000000000001 | -0.000000000003 |
| TV | -2.624717745861 | 8.149711423713  | 0.000000000002  |
| TV | -3.943699614026 | -3.497951662490 | 5.527842012471  |

# EQ'-SiO<sub>2</sub> 41

|    |                 |                 |                 |
|----|-----------------|-----------------|-----------------|
| O  | -0.426952011993 | 3.146105333751  | -1.496792718664 |
| O  | -1.007233385000 | -0.295341713075 | 1.684612770579  |
| O  | -5.302434138204 | -3.653615556188 | 1.217554460559  |
| O  | -5.955167972748 | -2.369096761458 | -0.536259889971 |
| O  | -3.241436643452 | -4.886697361792 | 1.129313774726  |
| O  | 2.727701569359  | 2.599913684661  | -1.443996917416 |
| O  | -2.206031562513 | 6.826905990439  | -1.496776852391 |
| O  | -2.786302790692 | 3.385403415778  | 1.684713609763  |
| O  | -7.081437561671 | 0.027154955374  | 1.217564969946  |
| O  | -7.734243999088 | 1.311657217846  | -0.536255691051 |
| O  | -5.020387697514 | -1.206105166620 | 1.129484038601  |
| O  | 0.948566376856  | 6.280683606797  | -1.443949919995 |
| Si | -4.052776448462 | -0.316290408703 | 0.131850868517  |
| Si | -4.067099016936 | -4.110730230990 | 2.352954504202  |
| Si | 6.350468887419  | -1.718966812084 | 1.946597352969  |
| Si | -5.846102390789 | -0.430019655325 | 2.352989027184  |
| Si | -2.273692131775 | -3.996987167365 | 0.131776936245  |
| Si | 4.571397164936  | 1.961813896390  | 1.946588536643  |
| TV | 8.475864978168  | -0.000000000000 | -0.000000000000 |
| TV | -3.558150354360 | 7.361542498344  | 0.000000000000  |
| TV | -2.253874021729 | -4.426984593895 | 1.948043354181  |

# EQ'-SiO<sub>2</sub> 42

|    |                 |                 |                 |
|----|-----------------|-----------------|-----------------|
| O  | -0.909920187103 | 1.369281123283  | -0.998347097359 |
| O  | 0.329916991056  | -0.528285736178 | -0.988886474874 |
| O  | 0.398734325732  | 2.648361561246  | 0.392100640748  |
| O  | 0.450042937476  | 4.837077575528  | -0.311318869570 |
| O  | 1.628984664597  | 1.367887501844  | -0.999319371366 |
| O  | 2.875025621970  | -0.529677986133 | -0.986561768750 |
| O  | 2.936253085951  | 2.645047554427  | 0.386855333666  |
| O  | 2.997175923822  | 4.835685093397  | -0.309773446469 |
| O  | 4.170023096052  | 1.369688663671  | -1.001554724952 |
| O  | 5.414046039070  | -0.527663302219 | -0.988402968635 |
| O  | 5.484883601102  | 2.643142094373  | 0.390594015091  |
| O  | 5.532120141881  | 4.831531979386  | -0.314134535185 |
| Si | 0.263220813594  | -2.897120871884 | -2.029213824280 |
| Si | -0.966072391687 | -0.014391716267 | 0.038959294064  |
| Si | 2.805750009953  | -2.893825859609 | -2.027661270404 |
| Si | 1.575215204025  | -0.016852402445 | 0.038707993509  |
| Si | 5.347682050857  | -2.902322570215 | -2.030704893173 |
| Si | 4.119167289691  | -0.013609607378 | 0.040027847270  |
| TV | 7.626987938008  | 0.000000000000  | -0.000000000000 |
| TV | 0.240564625209  | 7.509061143378  | 0.000000000001  |
| TV | -1.350593291621 | -0.870845628654 | 2.067961769187  |

# EQ'-SiO<sub>2</sub> 43

|    |                 |                 |                 |
|----|-----------------|-----------------|-----------------|
| O  | -1.301360179814 | 1.272973530575  | -1.187857153902 |
| O  | -0.009419676109 | -0.594988170377 | -0.828059852105 |
| O  | -0.067279116426 | 2.764870131447  | -0.059962483772 |
| O  | -1.357469518894 | 4.633920826616  | -0.421291153747 |
| O  | 1.231734244226  | 1.269818703366  | -1.185144683128 |
| O  | 2.536922117158  | -0.591742437290 | -0.830160306043 |
| O  | 2.478494092449  | 2.761131894853  | -0.059544620054 |
| O  | 1.178837102570  | 4.625710122198  | -0.416591400487 |
| O  | 3.780469468654  | 1.274977075379  | -1.185808189958 |
| O  | 5.080038851788  | -0.587519558720 | -0.829218110622 |
| O  | 5.025955202818  | 2.772201255287  | -0.062032969342 |
| O  | 3.718560130381  | 4.627955715683  | -0.414467783928 |
| Si | -0.084335343277 | -3.126688210694 | -1.333110302480 |
| Si | 1.288883932606  | 0.093297891757  | 0.085456022589  |
| Si | 2.457451597673  | -3.138664674848 | -1.334754765533 |
| Si | 3.831193714258  | 0.099422455647  | 0.087087093933  |
| Si | 5.000199420834  | -3.136288096172 | -1.332440313852 |
| Si | 6.375269970229  | 0.101886490619  | 0.088045144086  |
| TV | 7.626670651957  | 0.000000000003  | -0.000000000006 |
| TV | -2.573480404601 | 7.076026145407  | 0.000000000001  |
| TV | 1.350803508945  | -0.479772393398 | 2.191352174238  |

# EQ'-SiO<sub>2</sub> 44

|   |                 |                 |                 |
|---|-----------------|-----------------|-----------------|
| O | 1.046741690546  | 0.744074122836  | -0.389263698267 |
| O | -1.337880146195 | -2.996083747875 | 0.039987566167  |
| O | -5.525993953303 | -4.219101125877 | 1.705467894166  |
| O | -4.771925171309 | -1.095492627778 | 0.693290978945  |
| O | -3.545590009621 | -2.916424067863 | 0.878447000789  |
| O | 0.110329058283  | -2.270249453316 | -1.669922512124 |
| O | -1.685821046510 | -2.108222289155 | 1.945770817141  |
| O | -4.065218154883 | -5.844294100635 | 2.383100525333  |
| O | -8.251344601261 | -7.077678665716 | 4.044916773638  |
| O | -7.503741420955 | -3.951479840276 | 3.032440790927  |

|    |                 |                 |                |
|----|-----------------|-----------------|----------------|
| O  | -6.271236958130 | -5.769229113633 | 3.210401022049 |
| O  | -2.616829574240 | -5.122654536436 | 0.668586892757 |
| Si | -4.969252319602 | -6.599508967453 | 3.768608233660 |
| Si | 0.527358351607  | 2.649609087302  | 1.301991548082 |
| Si | 2.091558809406  | -1.294583031006 | 1.020478190037 |
| Si | -2.194857234063 | -0.206039027879 | 3.643292141763 |
| Si | -2.243756082452 | -3.745684995806 | 1.432803058545 |
| Si | -0.628013767205 | -4.150458847861 | 3.359309084763 |
| TV | 4.914270164033  | 0.000000000000  | 0.000000000000 |
| TV | 0.719601419687  | 5.247309056450  | 0.000000000000 |
| TV | -5.457864957295 | -5.706380329581 | 4.676678958958 |

# EQ'-SiO<sub>2</sub> 45

|    |                  |                 |                 |
|----|------------------|-----------------|-----------------|
| O  | -0.391238608272  | 2.188504842066  | -0.213336097210 |
| O  | 1.149246849272   | 1.560894428067  | 1.511921105803  |
| O  | -5.623556378099  | -3.145517778582 | 0.979289453934  |
| O  | -8.934330557179  | -3.574582493273 | 0.242108804006  |
| O  | -3.698265946601  | -4.316922801651 | 0.520964414972  |
| O  | 1.786656830868   | 0.941466592480  | -0.749484445181 |
| O  | -2.715963309551  | 5.651691502056  | -0.213355018587 |
| O  | -1.175873973052  | 5.023730955699  | 1.512396740701  |
| O  | -7.947780826956  | 0.317275648780  | 0.978670528998  |
| O  | -11.258764059346 | -0.112252968747 | 0.242519957149  |
| O  | -6.023535280877  | -0.854176669012 | 0.520518469452  |
| O  | -0.538143025757  | 4.404952817311  | -0.749066980982 |
| Si | -5.690450908613  | 0.238187563401  | -0.630749405118 |
| Si | -4.552142732855  | -4.023609367253 | 1.931168754241  |
| Si | 10.952015536687  | -1.200976934400 | 1.394083251177  |
| Si | -6.876975037212  | -0.560923995077 | 1.931073545529  |
| Si | -3.365191514658  | -3.224964895995 | -0.630681756557 |
| Si | 8.627317276361   | 2.262512297711  | 1.393927538118  |
| TV | 11.274977649234  | -0.000000000000 | 0.000000000000  |
| TV | -4.649953267835  | 6.925365625537  | 0.000000000000  |
| TV | -1.547634089980  | -3.544457721355 | 1.548606237834  |

# EQ'-SiO<sub>2</sub> 46

|    |                 |                 |                 |
|----|-----------------|-----------------|-----------------|
| O  | -1.703882450492 | 4.560317421569  | 1.206038823737  |
| O  | -0.389897878454 | -2.367015153623 | -1.619109575087 |
| O  | 0.280242683465  | -0.201965744203 | -0.979739201504 |
| O  | -0.568300541471 | 3.689555694654  | -0.612480978150 |
| O  | -3.435203464510 | 3.260296235855  | 2.485518563928  |
| O  | -2.121221698005 | -3.667005192285 | -0.339651491460 |
| O  | -1.451079077343 | -1.501955905395 | 0.299722266701  |
| O  | -2.299661664608 | 2.389525838671  | 0.667003636023  |
| O  | -5.166507961474 | 1.960300776427  | 3.764976341329  |
| O  | -3.852538979353 | -4.967015021328 | 0.939815301152  |
| O  | -3.182405406164 | -2.801978006894 | 1.579187781736  |
| O  | -4.030956371011 | 1.089508099092  | 1.946473853656  |
| Si | 1.948794956789  | -0.563154482005 | -1.573215261750 |
| Si | -1.386086092887 | 0.158669506779  | -0.392119507310 |
| Si | 0.217505296394  | -1.863173974857 | -0.293728456079 |
| Si | -3.117408349700 | -1.141306654645 | 0.887363010493  |
| Si | -1.513842453975 | -3.163169183787 | 0.985743259563  |
| Si | -4.848741491789 | -2.441339481644 | 2.166845814317  |
| TV | 5.496733486257  | -0.000000000000 | 0.000000000000  |
| TV | -2.433912678456 | 5.627194171435  | -0.000000000000 |
| TV | -5.193951702014 | -3.900032936364 | 3.838426375830  |



# EQ'-SiO<sub>2</sub> 47

|    |                 |                  |                 |
|----|-----------------|------------------|-----------------|
| O  | -1.072612595568 | 4.034746807231   | -0.521504054517 |
| O  | -1.050419597083 | -0.003126870619  | -0.679967634266 |
| O  | -4.635222079278 | -6.038218485561  | 2.871264340440  |
| O  | -4.814152490137 | -4.076307928502  | 1.446457931409  |
| O  | -3.588296629364 | -6.032339751604  | 0.839501116021  |
| O  | 0.073405777503  | 2.076346685871   | -1.400554403155 |
| O  | -2.284364231741 | -0.027091365870  | 1.557802435304  |
| O  | -2.262425587005 | -4.064597650088  | 1.399356696862  |
| O  | -5.847173717490 | -10.099510376487 | 4.950810589601  |
| O  | -6.026246499370 | -8.137962914054  | 3.525936309803  |
| O  | -4.800305778138 | -10.094328487789 | 2.918925456517  |
| O  | -1.138417082634 | -1.985248849609  | 0.678715261137  |
| Si | -3.531221587576 | -7.081321404651  | 2.159064139324  |
| Si | -2.310325439617 | -0.690198417009  | 0.077853084793  |
| Si | 6.084953751470  | -1.320544511856  | 2.157909775236  |
| Si | -3.522282833077 | -4.751570073734  | 2.157323033599  |
| Si | -2.319278214741 | -3.019524902855  | 0.079823998587  |
| Si | 4.872768144291  | -5.382108198994  | 4.237260831903  |
| TV | 7.199391943075  | 0.000000000000   | -0.000000000000 |
| TV | -2.387633961719 | 4.045084753040   | -0.000000000000 |
| TV | -2.424127729238 | -8.123399532177  | 4.158783687083  |

# EQ'-SiO<sub>2</sub> 48

|    |                 |                 |                 |
|----|-----------------|-----------------|-----------------|
| O  | 0.767160297618  | 3.171065595293  | -0.939809617149 |
| O  | 1.487249940663  | -2.480595567972 | -0.506233214183 |
| O  | -7.204285662162 | -4.680804802783 | 3.295811303999  |
| O  | -4.289603469051 | -3.427972005006 | 0.756465048608  |
| O  | -5.041314946025 | -5.752844227356 | 1.243890757378  |
| O  | 0.587665670852  | -0.263971869631 | -1.180855810665 |
| O  | -1.371625538236 | -0.188354269355 | 1.041575162666  |
| O  | -0.661017786590 | -5.829945442210 | 1.470489741933  |
| O  | -9.342641401573 | -8.050630404921 | 5.275806456965  |
| O  | -6.441703141452 | -6.775736367902 | 2.735972918767  |
| O  | -7.188047505454 | -9.088149752215 | 3.228208454411  |
| O  | -1.564032065637 | -3.610214642929 | 0.796862472166  |
| Si | -3.721508478467 | -6.982902890736 | 1.135262212972  |
| Si | -3.283055897598 | 2.144301659404  | 0.978250704398  |
| Si | 4.733931280740  | -0.195469192968 | 2.069108867813  |
| Si | -5.423867839433 | -1.219756189758 | 2.951130033288  |
| Si | -1.587075135679 | -3.617291109590 | -0.843530440726 |
| Si | 2.604107937614  | -3.555090967857 | 4.046518640547  |
| TV | 7.562400151488  | -0.000000000000 | -0.000000000000 |
| TV | -2.112077457179 | 4.030227079350  | -0.000000000000 |
| TV | -4.285618639685 | -6.712197833189 | 3.951812090015  |

# EQ'-SiO<sub>2</sub> 49

|   |                 |                 |                 |
|---|-----------------|-----------------|-----------------|
| O | -1.219699682192 | 2.303373880707  | -1.281533309396 |
| O | -1.370770094607 | 0.191158913094  | 1.271257465994  |
| O | -4.501309039466 | -3.955339752212 | 1.102438420437  |
| O | -5.926004095098 | -2.371633379560 | 0.355723652426  |
| O | -2.042745498274 | -3.833808983091 | 0.839812693245  |
| O | 1.101321893305  | 2.339630015845  | -1.568678112333 |
| O | -3.939201887942 | 5.604349280454  | -1.281512586281 |
| O | -4.090256384307 | 3.492156986899  | 1.271219147626  |
| O | -7.220844544026 | -0.654379522957 | 1.102467276712  |

|    |                 |                 |                 |
|----|-----------------|-----------------|-----------------|
| O  | -8.645517601669 | 0.929311641180  | 0.355745765993  |
| O  | -4.762290380699 | -0.532840359949 | 0.839755396219  |
| O  | -1.618168881982 | 5.640611934929  | -1.568729511092 |
| Si | -5.106529515497 | 0.354083639825  | -0.534504192269 |
| Si | -4.122008233022 | -4.108178331953 | 2.736862725113  |
| Si | 6.924013167335  | -2.614133872137 | 2.064612013197  |
| Si | -6.841528152316 | -0.807224677246 | 2.736890193645  |
| Si | -2.387044130560 | -2.946878279069 | -0.534463529001 |
| Si | 4.204472971612  | 0.686863306169  | 2.064605350204  |
| TV | 9.186592333912  | -0.000000000000 | -0.000000000000 |
| TV | -5.439043447612 | 6.601939530693  | 0.000000000000  |
| TV | -1.162967841815 | -3.980322178545 | 1.973180626551  |

# EQ'-SiO<sub>2</sub> 50

|    |                 |                 |                 |
|----|-----------------|-----------------|-----------------|
| O  | -1.092886673892 | 0.026111793226  | -1.581500108965 |
| O  | -0.364879999980 | -1.447897136750 | 0.087715614412  |
| O  | -3.520309781237 | -3.302053341413 | 2.790231322366  |
| O  | -4.426188598519 | -1.280290781160 | 2.224166810317  |
| O  | -3.214492833413 | -3.198238331553 | 0.525703963855  |
| O  | 0.100145171067  | -2.006279719211 | -2.186332160144 |
| O  | -2.032640699380 | -1.810618212552 | 1.753270730340  |
| O  | -1.304636004597 | -3.284625218829 | 3.422485329878  |
| O  | -4.460067003614 | -5.138796831161 | 6.125011430909  |
| O  | -5.365932825947 | -3.117026842578 | 5.558938413669  |
| O  | -4.154244187537 | -5.034966803580 | 3.860477555551  |
| O  | -0.839618731743 | -3.843007432276 | 1.148438121140  |
| Si | -2.446435074484 | -4.457801805441 | 3.660027056059  |
| Si | -1.218767478969 | -0.380993237322 | 1.506586923166  |
| Si | 1.073978010294  | -1.506252297466 | 0.891808936319  |
| Si | -2.158514337022 | -2.217730720811 | 4.841357558983  |
| Si | -1.506680266689 | -2.621066204300 | 0.325257239606  |
| Si | 0.134223759870  | -3.342982596058 | 4.226569391793  |
| TV | 4.559622004948  | 0.000000000000  | -0.000000000000 |
| TV | -1.981872676611 | 3.965739390187  | -0.000000000000 |
| TV | -1.879509751810 | -3.673465797032 | 6.669539095257  |

# EQ'-SiO<sub>2</sub> 51

|    |                 |                 |                 |
|----|-----------------|-----------------|-----------------|
| O  | -2.582950411072 | -2.667069878699 | -1.852363340321 |
| O  | 0.773178844117  | -0.612774123848 | -0.054916019960 |
| O  | -0.900093363537 | -0.831606844779 | -1.733973244984 |
| O  | -0.910073586775 | -2.402916222244 | 0.101912451710  |
| O  | -0.907260677921 | -0.696188635748 | 1.692957848307  |
| O  | -0.899510651634 | 0.990546774039  | -0.197098082392 |
| O  | 0.763391656874  | -2.667066858965 | -1.852362694740 |
| O  | 4.119501517176  | -0.612785088955 | -0.054906873542 |
| O  | 2.446231531906  | -0.831614165211 | -1.733987576374 |
| O  | 2.436257678154  | -2.402915054212 | 0.101924454201  |
| O  | 2.439057900059  | -0.696192470678 | 1.692960146534  |
| O  | 2.446813589583  | 0.990546236953  | -0.197105762680 |
| Si | 4.120004149252  | -1.066526896887 | -1.636251908173 |
| Si | -0.910279198533 | -3.994844874842 | -0.062909450395 |
| Si | -2.580895089307 | -0.724599997390 | 1.543998786704  |
| Si | 2.436040750330  | -3.994838307749 | -0.062904627830 |
| Si | 0.773677501866  | -1.066518469687 | -1.636254337644 |
| Si | 0.765426497144  | -0.724601897013 | 1.543992892832  |
| TV | 6.692650400440  | 0.000000000000  | -0.000000000000 |
| TV | -1.661500418790 | 5.191019647827  | -0.000000000000 |

|                           |                 |                 |                 |
|---------------------------|-----------------|-----------------|-----------------|
| TV                        | -1.681054172102 | -1.561655419409 | 3.460242030018  |
| # EQ'-SiO <sub>2</sub> 52 |                 |                 |                 |
| O                         | -2.652701964424 | -3.125332417871 | -3.136508406669 |
| O                         | -2.281461337067 | -1.544896363051 | -1.572895286529 |
| O                         | 1.159926195374  | 1.922545908145  | 2.457041792827  |
| O                         | 0.335782937159  | 0.435544033857  | 0.752321706053  |
| O                         | 2.750982800760  | -0.028248756371 | 0.016360661900  |
| O                         | -3.847697450312 | -1.219846604076 | -3.333411000170 |
| O                         | -3.406001820386 | -3.262292893117 | -0.669880295342 |
| O                         | -3.034759890605 | -1.681887006016 | 0.893751468100  |
| O                         | 0.406630824375  | 1.785555166775  | 4.923662284030  |
| O                         | -0.417529580811 | 0.298568021303  | 3.218975688967  |
| O                         | 1.997711633094  | -0.165241115831 | 2.482967236878  |
| O                         | -4.601000083089 | -1.356815750310 | -0.866783841695 |
| Si                        | -2.192051563632 | -1.891179436066 | 2.504169418466  |
| Si                        | 3.369925510601  | 1.437317563730  | 0.357425035216  |
| Si                        | -3.373553279859 | -0.371950346028 | -0.385510711483 |
| Si                        | 2.616630277308  | 1.300331427147  | 2.824060709805  |
| Si                        | -1.438738377479 | -1.754192853775 | 0.037554649985  |
| Si                        | -4.126880307342 | -0.508871640734 | 2.081122626973  |
| TV                        | 4.544037256741  | -0.000000000000 | 0.000000000000  |
| TV                        | 3.173190116811  | 5.378083441813  | 0.000000000001  |
| TV                        | -1.506581513721 | -0.273969082895 | 4.933257972366  |

|                           |                 |                 |                 |
|---------------------------|-----------------|-----------------|-----------------|
| # EQ'-SiO <sub>2</sub> 53 |                 |                 |                 |
| O                         | -3.098736177363 | -2.896988768677 | -3.635358795640 |
| O                         | -3.059347613080 | -1.406206181597 | 0.803142759632  |
| O                         | 1.286964187284  | 2.334145414068  | 1.707146779646  |
| O                         | 0.295996222937  | 0.687524438704  | 0.589853091153  |
| O                         | 2.486146343972  | 0.454376750900  | 0.490999849095  |
| O                         | -4.190029503217 | -1.003070169853 | -2.769574797320 |
| O                         | -3.777491085352 | -3.010115927520 | -1.280554574113 |
| O                         | -3.738103875913 | -1.519328583703 | 3.157946011216  |
| O                         | 0.608209581551  | 2.221025436456  | 4.061954412524  |
| O                         | -0.382747340897 | 0.574407118835  | 2.944659554446  |
| O                         | 1.807396706729  | 0.341252967739  | 2.845806155411  |
| O                         | -4.868783598978 | -1.116193170954 | -0.414771934806 |
| Si                        | -2.146724259197 | -2.264356368010 | 3.014411383152  |
| Si                        | 3.443378368109  | 1.478944177354  | -0.318601358551 |
| Si                        | -2.596641198300 | -0.193294060634 | -2.793884049084 |
| Si                        | 2.764627674064  | 1.365819751417  | 2.036204264074  |
| Si                        | -1.467963561527 | -2.151233537493 | 0.659608393101  |
| Si                        | -3.275395845875 | -0.306415933132 | -0.439077622626 |
| TV                        | 4.439121337152  | 0.000000000000  | 0.000000000000  |
| TV                        | 3.533932288533  | 5.604861150418  | -0.000000000000 |
| TV                        | -1.357512583378 | -0.226246297751 | 4.709608195365  |

|                           |                 |                 |                 |
|---------------------------|-----------------|-----------------|-----------------|
| # EQ'-SiO <sub>2</sub> 54 |                 |                 |                 |
| O                         | -2.950219109598 | 1.527543695350  | -0.527796825158 |
| O                         | 1.641308508658  | -0.831481102682 | -0.929258863171 |
| O                         | -0.604937540667 | 1.658121487743  | -0.388903467248 |
| O                         | -1.711449497869 | 3.476701868869  | 0.517591433114  |
| O                         | -4.306333689314 | -0.042041313342 | 0.920748493021  |
| O                         | 0.285005770780  | -2.398940757868 | 0.511112021067  |
| O                         | -1.961833028241 | 0.097957837857  | 1.054101458090  |
| O                         | -3.060127576382 | 1.918628902360  | 1.959958357553  |

|    |                 |                 |                 |
|----|-----------------|-----------------|-----------------|
| O  | -5.665165371784 | -1.610544084422 | 2.359964765372  |
| O  | -1.064199741055 | -3.964967015443 | 1.957151204871  |
| O  | -3.317009888479 | -1.470264180473 | 2.495811502902  |
| O  | -4.419566285038 | 0.342177807539  | 3.408504053925  |
| Si | 2.993632548208  | -1.141916016804 | -2.161465867720 |
| Si | -1.699105783809 | 0.411959364192  | -0.566985154065 |
| Si | 1.635946884772  | -2.707077297411 | -0.719395345873 |
| Si | -3.053155787261 | -1.154566531434 | 0.875804499857  |
| Si | 0.286135939917  | -4.275562643803 | 0.724688570693  |
| Si | -4.410374352575 | -2.721745706618 | 2.321175406031  |
| TV | 4.692475228585  | -0.000000000000 | 0.000000000000  |
| TV | -4.337765424353 | 5.869271399330  | 0.000000000000  |
| TV | -4.064373871510 | -4.701477460548 | 4.331022303296  |

# EQ'-SiO<sub>2</sub> 55

|    |                 |                 |                 |
|----|-----------------|-----------------|-----------------|
| O  | 5.314219849802  | 0.125245290417  | -1.065252713511 |
| O  | 0.627380215504  | -1.194008285500 | 2.782814287237  |
| O  | -0.407803686106 | -0.179981235608 | 0.931971237413  |
| O  | 1.877178281971  | -0.850899077607 | 0.703906871191  |
| O  | 4.603567941298  | 2.557192891721  | -1.062847438113 |
| O  | -0.079055955891 | 1.230822621891  | 2.782036711229  |
| O  | -1.111562353881 | 2.244781027357  | 0.934059106584  |
| O  | 1.171366383526  | 1.578582149540  | 0.702706397714  |
| O  | 3.902355990724  | 4.980573802642  | -1.064503110693 |
| O  | -0.784459688565 | 3.661644973564  | 2.778355689086  |
| O  | -1.815656060925 | 4.676453212199  | 0.930183857636  |
| O  | 0.467075129773  | 4.004427677825  | 0.701393980763  |
| Si | 2.821993813515  | 0.727233138263  | 0.921535345461  |
| Si | 0.896063016443  | 0.201318889569  | 1.905875000544  |
| Si | 2.121502646445  | 3.156741168753  | 0.920759059780  |
| Si | 0.194259907204  | 2.626864810995  | 1.904700054364  |
| Si | 1.414363117599  | 5.583013603445  | 0.917048043858  |
| Si | -0.509058161028 | 5.057436716125  | 1.905078501724  |
| TV | 4.629443054446  | 0.000000000000  | -0.000000000000 |
| TV | -2.112863642049 | 7.283367277204  | -0.000000000000 |
| TV | -2.245029333547 | -1.945439165746 | 3.531863373917  |

# EQ'-SiO<sub>2</sub> 56

|    |                 |                 |                 |
|----|-----------------|-----------------|-----------------|
| O  | 0.502988100057  | 0.609180842875  | -0.322636666757 |
| O  | -1.112413919287 | -2.335365307765 | 0.346448228591  |
| O  | -6.334364729236 | -3.923736258776 | 1.851098643336  |
| O  | -4.984939195763 | -1.286240746790 | 0.745811176953  |
| O  | -3.795079755226 | -3.547154604176 | 0.698502386201  |
| O  | 1.071899859611  | -2.277993723049 | -1.756184651682 |
| O  | 0.908851632104  | 5.184037054453  | -0.322631240379 |
| O  | -0.706557728061 | 2.239498126306  | 0.346440615676  |
| O  | -5.928500176092 | 0.651129973232  | 1.851093422179  |
| O  | -4.579070603572 | 3.288626584903  | 0.745825162660  |
| O  | -3.389215514416 | 1.027716130588  | 0.698512347205  |
| O  | 1.477763975633  | 2.296875934198  | -1.756196683612 |
| Si | -1.735038597079 | 1.264893477054  | 1.254729445682  |
| Si | 0.905027852283  | 1.688908440028  | 1.099473568076  |
| Si | 2.423155716053  | -0.703186255416 | 1.068742236054  |
| Si | 1.310899494072  | 6.263761838003  | 1.099455311170  |
| Si | -2.140903998151 | -3.309970122499 | 1.254740487422  |
| Si | 2.829022778013  | 3.871675140055  | 1.068745071745  |
| TV | 5.781182786582  | 0.000000000000  | 0.000000000000  |

|    |                 |                 |                 |
|----|-----------------|-----------------|-----------------|
| TV | 0.811737366732  | 9.149732651921  | -0.000000000000 |
| TV | -3.137456970567 | -2.486856668590 | 2.256329277468  |

# EQ'-SiO<sub>2</sub> 57

|    |                  |                 |                 |
|----|------------------|-----------------|-----------------|
| O  | -0.405699805955  | 1.993223715688  | -0.337060202579 |
| O  | 0.010496090791   | 0.722762217732  | -2.291435146571 |
| O  | 6.053067786813   | 1.996513186158  | -2.290609016729 |
| O  | -6.448946188057  | 5.775320569213  | -0.337934775927 |
| O  | -2.836281494871  | -0.537927073247 | 1.616406714399  |
| O  | -2.420092831546  | -1.808416438259 | -0.337937110170 |
| O  | 3.622400092722   | -0.534704443894 | -0.337064677872 |
| O  | -8.879493203886  | 3.244167459357  | 1.615606322961  |
| O  | -5.266844210064  | -3.069132759986 | 3.569936663986  |
| O  | -4.850654032412  | -4.339608263348 | 1.615588475745  |
| O  | 1.191913207966   | -3.065843294168 | 1.616406056645  |
| O  | -11.310050865260 | 0.712919523105  | 3.569141086044  |
| Si | 0.394731176108   | -4.318343379954 | 0.641449057017  |
| Si | 0.394401625281   | -1.790447811469 | 0.641477392575  |
| Si | -2.035824948806  | -6.849472491134 | 2.594989076455  |
| Si | -2.036186066160  | -4.321570331748 | 2.594976803161  |
| Si | -4.466423277193  | -9.380717261612 | 4.548488027885  |
| Si | -4.466745338547  | -6.852817275642 | 4.548513379770  |
| TV | 4.027825906918   | -0.000000000001 | -0.000000000003 |
| TV | -4.028510481976  | 5.055827611485  | 0.000000000002  |
| TV | -7.291720352823  | -7.593557894325 | 5.860546438136  |

# EQ'-SiO<sub>2</sub> 58

|    |                 |                 |                 |
|----|-----------------|-----------------|-----------------|
| O  | 1.999174748414  | 5.719798103917  | -0.178493741418 |
| O  | -1.185367459773 | -1.176444669868 | 0.231713375044  |
| O  | -7.709838342310 | -6.123865026607 | 1.814079523880  |
| O  | -6.794296864645 | -4.242439018247 | 0.699516383070  |
| O  | -4.534128811227 | -3.651774641840 | 0.935397807118  |
| O  | 0.575917983508  | 1.787139366626  | -0.170005867106 |
| O  | -0.277059868506 | 9.468276381196  | -0.178493992653 |
| O  | -3.461618563770 | 2.572042581387  | 0.231744558989  |
| O  | -9.986079909908 | -2.375419183840 | 1.814063719620  |
| O  | -9.070552220976 | -0.493971684188 | 0.699493371742  |
| O  | -6.810406457307 | 0.096745866578  | 0.935442429210  |
| O  | -1.700304304603 | 5.535604968758  | -0.169974133853 |
| Si | -5.390085629635 | 0.309382965598  | 0.029524886302  |
| Si | -2.602845807574 | -0.315959000523 | -0.214110115079 |
| Si | 9.342588584167  | -3.835952673418 | 1.838336887620  |
| Si | -4.879085465110 | 3.432545315658  | -0.214113642704 |
| Si | -3.113825674841 | -3.439133858880 | 0.029459683875  |
| Si | 7.066374118542  | -0.087522437955 | 1.838387726876  |
| TV | 10.167976366291 | 0.000000000000  | 0.000000000000  |
| TV | -4.552501142373 | 7.496924780959  | -0.000000000000 |
| TV | -2.820724344244 | -4.770420696316 | 1.568490099365  |

# EQ'-SiO<sub>2</sub> 59

|   |                 |                 |                 |
|---|-----------------|-----------------|-----------------|
| O | -0.173167561435 | 1.334287535860  | -0.424455082361 |
| O | -0.789076823342 | 4.491559941384  | -1.028294891368 |
| O | -2.424453118958 | 0.125466265146  | -1.242523461835 |
| O | -2.029689869388 | 2.463503776814  | -1.547844777888 |
| O | -0.073898019072 | 3.391288646027  | -0.633417478660 |
| O | -0.565304761778 | -0.999473685443 | -0.116037019666 |
| O | 0.017699490727  | -0.158842377115 | 2.050212929580  |

|    |                 |                 |                 |
|----|-----------------|-----------------|-----------------|
| O  | -0.598253350194 | 2.998405938951  | 1.446382244568  |
| O  | -2.233624051109 | -1.367699247938 | 1.232167809721  |
| O  | -1.838857495796 | 0.970344853606  | 0.926861719063  |
| O  | 0.116929773857  | 1.898163175015  | 1.841283558756  |
| O  | -0.374480970443 | -2.492627230122 | 2.358642678261  |
| Si | 2.475496651972  | 0.921956584630  | 2.531243015641  |
| Si | 0.481792068995  | 1.477755592095  | -2.069512569477 |
| Si | -3.148418308082 | 5.465720834569  | -1.719567831386 |
| Si | 0.672600024521  | -0.015390094443 | 0.405193195733  |
| Si | 2.284674563111  | 2.415109134097  | 0.056542499567  |
| Si | -2.957585217743 | 3.972558714686  | 0.755095210566  |
| TV | 3.747466250730  | 0.000000000000  | 0.000000000000  |
| TV | -2.019978582912 | 6.420160626554  | -0.000000000001 |
| TV | 0.381651944384  | -2.986329705599 | 4.949370267648  |

# EQ'-SiO<sub>2</sub> 60

|    |                 |                 |                 |
|----|-----------------|-----------------|-----------------|
| O  | 0.921115552380  | 2.525790707345  | -1.302748891147 |
| O  | -0.545271643354 | -1.995579268181 | -0.190752837981 |
| O  | -5.948360102360 | -5.256964510665 | 3.379387835118  |
| O  | -4.210921448098 | -3.992803896039 | 2.406571164735  |
| O  | -2.483849950851 | -3.416526737696 | 0.144272625998  |
| O  | 0.939992198679  | -0.844953862619 | -1.122264391046 |
| O  | -0.672744768038 | -0.391483080157 | 1.116123628830  |
| O  | -2.139126533307 | -4.912866500699 | 2.228131385381  |
| O  | -7.542242089058 | -8.174230154114 | 5.798236666937  |
| O  | -5.804784706004 | -6.910107642941 | 4.825437107359  |
| O  | -4.077715185059 | -6.333819700895 | 2.563133483475  |
| O  | -0.653875546507 | -3.762248455137 | 1.296601273575  |
| Si | -3.214897853518 | -5.119812706526 | 3.501690823350  |
| Si | -1.669243678171 | 0.735900781886  | 0.022541732390  |
| Si | 1.176946252014  | -0.733325177434 | 0.552662349733  |
| Si | -3.263107788048 | -2.181385241085 | 2.441412503190  |
| Si | -1.621029457185 | -2.202516334023 | 1.082821304178  |
| Si | -0.416933813377 | -3.650628612971 | 2.971530508672  |
| TV | 5.639487505661  | -0.000000000000 | 0.000000000000  |
| TV | -2.090961243493 | 4.288968345076  | 0.000000000000  |
| TV | -3.187725219049 | -5.834573786677 | 4.837738949909  |

# EQ'-SiO<sub>2</sub> 61

|    |                 |                 |                 |
|----|-----------------|-----------------|-----------------|
| O  | -1.447502917635 | 1.037943023225  | -1.846736794646 |
| O  | -1.942683799432 | -0.131966617846 | 1.820148033269  |
| O  | -6.527506965772 | -4.450531952462 | 1.914495980333  |
| O  | -3.835357734783 | -1.524007099979 | 1.882633138440  |
| O  | -3.114708431190 | -2.767001395612 | 0.099663332140  |
| O  | -0.418564843727 | -0.049381245492 | 0.037339819348  |
| O  | -2.339615251523 | -1.557386575561 | 0.026795281920  |
| O  | -2.834916004746 | -2.726540247005 | 3.693341909065  |
| O  | -7.419882669710 | -7.045753730419 | 3.788055477940  |
| O  | -4.727216390910 | -4.119330499938 | 3.756329021337  |
| O  | -4.007085892942 | -5.362242065858 | 1.973196913940  |
| O  | -1.310688901622 | -2.644707082991 | 1.910830868022  |
| Si | -2.877113116507 | -6.473149107410 | 1.178262201433  |
| Si | -3.335682582857 | -0.400294630486 | 0.725954558031  |
| Si | 8.839795082119  | -1.242720899927 | 1.081794835116  |
| Si | -4.228023994379 | -2.995474483478 | 2.599499452158  |
| Si | -1.984764484658 | -3.877969610707 | -0.695297991902 |
| Si | 7.947416536535  | -3.837849840142 | 2.955393825819  |

|    |                 |                 |                |
|----|-----------------|-----------------|----------------|
| TV | 9.832502917665  | 0.000000000000  | 0.000000000000 |
| TV | -2.865100592397 | 3.329719404390  | 0.000000000001 |
| TV | -1.784483175723 | -5.190533482675 | 3.747115088221 |

# EQ'-SiO<sub>2</sub> 62

|    |                 |                 |                 |
|----|-----------------|-----------------|-----------------|
| O  | -1.114020016637 | 0.619991709886  | 3.817247939798  |
| O  | -0.756941506819 | -1.486201773046 | 4.608785218263  |
| O  | -1.210708606760 | -1.119866751399 | 2.235303924425  |
| O  | -1.382696447422 | -0.730494363752 | 0.080692746281  |
| O  | -0.779712417127 | -3.194651484903 | 2.924781479276  |
| O  | -3.552281792570 | -0.079318835569 | 0.745690564950  |
| O  | -3.600917051848 | 3.532386652263  | 3.817223339680  |
| O  | -3.243837495764 | 1.426193288114  | 4.608812878145  |
| O  | -3.697570362878 | 1.792518760646  | 2.235310607470  |
| O  | -3.869554971317 | 2.181885425621  | 0.080689723573  |
| O  | -3.266554524801 | -0.282280090847 | 2.924728267571  |
| O  | -6.039145963104 | 2.833055784762  | 0.745720210990  |
| Si | -2.477561434529 | 1.135841882701  | 3.158285556428  |
| Si | 0.159733914393  | -1.839917910912 | 0.348581086340  |
| Si | -0.641645142360 | 0.436539762367  | 1.975111802731  |
| Si | -2.327121013512 | 1.072458649619  | 0.348548309708  |
| Si | 0.009306544926  | -1.776519366329 | 3.158234736403  |
| Si | -3.128507336745 | 3.348901829086  | 1.975155690786  |
| TV | 3.991347201631  | -0.000000000000 | 0.000000000000  |
| TV | -4.973739122642 | 5.824780954937  | -0.000000000000 |
| TV | 0.104580145855  | -2.901925781559 | 5.121006858226  |

## (vi) GeO<sub>2</sub> at 10<sup>6</sup> atm

### # EQ'-GeO<sub>2</sub> 0

|    |                 |                  |                 |
|----|-----------------|------------------|-----------------|
| O  | -3.885538629470 | 2.474289815930   | 0.638952035822  |
| O  | 2.387316434155  | 1.725987045270   | -1.523568400870 |
| O  | -2.403308485127 | 0.764862729870   | 1.287420079706  |
| O  | 1.127786467694  | -3.325924510114  | 0.690052932821  |
| O  | -6.654253986348 | -0.896017291946  | 2.067272124518  |
| O  | -0.393424855662 | -1.658747063893  | -0.093127230824 |
| O  | -5.168844507400 | -2.604295249635  | 2.715724221866  |
| O  | -1.637368583156 | -6.700396227529  | 2.112826617475  |
| O  | -9.418509544295 | -4.271207303445  | 3.498091203681  |
| O  | -3.158692521735 | -5.038589224400  | 1.337787020660  |
| O  | -7.946036376538 | -5.996754398988  | 4.132787430101  |
| O  | -4.407029797337 | -10.066992964208 | 3.552851916780  |
| Ge | -2.002729964735 | -4.810882512998  | 2.682518686733  |
| Ge | 1.301472272787  | -11.935418056089 | 0.718036405834  |
| Ge | -1.466063264742 | -15.309732206538 | 2.148326499820  |
| Ge | 3.535510071542  | 1.939281050211   | -0.171004733456 |
| Ge | 0.764696366103  | -1.438937025730  | 1.253642029708  |
| Ge | 4.075103681736  | -8.553758390478  | -0.713464277238 |
| TV | 5.771193630773  | -0.000000000001  | 0.000000000006  |
| TV | -1.668744460555 | 5.408800343764   | -0.000000000004 |
| TV | -8.311973646671 | -10.131433042166 | 4.284572023817  |

### # EQ'-GeO<sub>2</sub> 1

|    |                 |                 |                 |
|----|-----------------|-----------------|-----------------|
| O  | -0.528993403499 | 1.309715655163  | 0.635535723004  |
| O  | -1.872839565729 | -0.899648819247 | -2.926615500255 |
| O  | -0.529620614709 | 0.416580523421  | 2.829881058360  |
| O  | -1.878322319311 | -1.794799574224 | -0.735270364144 |
| O  | 0.863043287824  | 3.619611998287  | 0.582816368251  |
| O  | -2.758115365693 | 1.311702337532  | -2.940191844664 |
| O  | 0.352709507829  | 2.613393663739  | 2.791712155102  |
| O  | -2.759165769276 | 0.412085776911  | -0.718203115677 |
| O  | 1.746931650207  | 4.924112303310  | 2.844786096692  |
| O  | -1.363893357974 | 3.620061977610  | -2.888444883299 |
| O  | 1.751963278975  | 5.816717434542  | 5.038244978584  |
| O  | -1.873932598244 | 2.611466534075  | -0.683749207957 |
| Ge | 0.245556173432  | 4.278850295664  | -2.281752521112 |
| Ge | 0.973367751126  | 1.951861120076  | -0.075556570706 |
| Ge | 2.472139742737  | 4.278163791849  | -0.024263112344 |
| Ge | -1.200685176042 | -0.244240476352 | -0.049855041848 |
| Ge | -1.254158464338 | 1.952172772522  | -2.232401177263 |
| Ge | 1.026223574779  | -0.242059417994 | 2.158099107142  |
| TV | 4.453898820934  | 0.000000000001  | 0.000000000000  |
| TV | 1.397309406449  | 6.717868184632  | -0.000000000002 |
| TV | 0.001119325606  | 0.000898472069  | 4.413527048569  |

### # EQ'-GeO<sub>2</sub> 2

|   |                 |                 |                 |
|---|-----------------|-----------------|-----------------|
| O | -0.338399414132 | -1.061019638863 | 0.501944056043  |
| O | 2.167338556836  | 0.901863909538  | -1.115722222557 |
| O | -1.379676368766 | -1.077971390375 | 2.792023479142  |
| O | -0.350956674617 | -3.028564513716 | -1.113458057407 |
| O | -0.340818356163 | 2.885850705917  | 0.501938596875  |
| O | 2.164900076041  | 4.848754210073  | -1.115720303600 |
| O | -1.382105710099 | 2.868879179458  | 2.792029571250  |



|    |                 |                 |                 |
|----|-----------------|-----------------|-----------------|
| O  | -0.353364302001 | 0.918308474744  | -1.113457824258 |
| O  | -0.343227144661 | 6.832703688983  | 0.501937474184  |
| O  | 2.162493368857  | 8.795616962373  | -1.115716095572 |
| O  | -1.384506046217 | 6.815758625875  | 2.792031271031  |
| O  | -0.355791171424 | 4.865174826444  | -1.113461308081 |
| Ge | 3.429456665428  | 9.787920516663  | -0.305275130643 |
| Ge | 0.912773100280  | -0.078147315766 | -0.306141891227 |
| Ge | 0.910354378425  | 3.868734303709  | -0.306139877011 |
| Ge | 3.434290507769  | 1.894187130439  | -0.305278684705 |
| Ge | 3.431868750258  | 5.841054114320  | -0.305278486460 |
| Ge | 0.915184802278  | -4.025002440242 | -0.306138616291 |
| TV | 5.044635977727  | -0.000000000001 | 0.000000000006  |
| TV | -0.007251581169 | 11.840601561076 | -0.000000000012 |
| TV | -3.559841565551 | -3.952695746310 | 2.293410256087  |

# EQ'-GeO<sub>2</sub> 3

|    |                 |                 |                 |
|----|-----------------|-----------------|-----------------|
| O  | 1.059654591462  | -0.377603793977 | 0.503282064593  |
| O  | -0.539578475221 | -1.488814268788 | -2.478732151552 |
| O  | 0.268468222926  | 0.754819876327  | 2.625563100876  |
| O  | 0.249122851759  | -2.620623752450 | -0.356319502951 |
| O  | -0.524959422091 | 1.865089717417  | 0.503089601175  |
| O  | -2.124376459481 | 0.753714259554  | -2.478742778912 |
| O  | -1.316438287787 | 2.997263270709  | 2.625467664931  |
| O  | -1.335748113869 | -0.378060889569 | -0.356248293901 |
| O  | -2.110121840321 | 4.107502811931  | 0.503321630999  |
| O  | -3.709354574830 | 2.996359553371  | -2.478727132018 |
| O  | -2.901359505794 | 5.240020763421  | 2.625562230150  |
| O  | -2.920576472052 | 1.864586572325  | -0.356207370158 |
| Ge | -2.910612417134 | 3.552397328705  | -0.987164690849 |
| Ge | 1.069144872174  | 1.309777518272  | 1.135021540773  |
| Ge | -0.515758895416 | 3.552402476169  | 1.134989364066  |
| Ge | 0.259161152955  | -0.932823131751 | -0.987176148194 |
| Ge | -1.325708255078 | 1.309743094429  | -0.987147628327 |
| Ge | 2.653977713764  | -0.932855069163 | 1.134940647216  |
| TV | 4.790286993961  | 0.000000000000  | 0.000000000000  |
| TV | -4.754721859390 | 6.727778682812  | -0.000000000003 |
| TV | -0.001284206681 | 0.000608619544  | 4.244460893149  |

# EQ'-GeO<sub>2</sub> 4

|    |                 |                 |                 |
|----|-----------------|-----------------|-----------------|
| O  | -1.159784438290 | 1.426424433229  | -0.093199028067 |
| O  | 3.053744238724  | 0.000354665097  | -1.438720689518 |
| O  | -3.436435553807 | 1.898015572974  | -0.091070795651 |
| O  | 3.548546446488  | 7.698223463479  | 2.508499986394  |
| O  | -2.875222631743 | 0.002698110130  | 1.254566524809  |
| O  | 0.697212951593  | 0.407626360517  | 1.253023889649  |
| O  | -3.577035807271 | 4.342490791028  | -0.093206625185 |
| O  | 0.636482118301  | 2.916436787988  | -1.438698310429 |
| O  | -5.853691183268 | 4.814116846990  | -0.091054354021 |
| O  | 1.131264972712  | 10.614300297092 | 2.508503628001  |
| O  | -5.292480786202 | 2.918808756433  | 1.254579019066  |
| O  | -1.720044503707 | 3.323703550728  | 1.253036685399  |
| Ge | -3.507171134353 | 3.118166912151  | -1.409014110670 |
| Ge | -1.088913325862 | 0.206051215430  | 1.223234753331  |
| Ge | 1.875575188391  | 0.204065213882  | -0.093100696378 |
| Ge | -3.506160006379 | 3.122115682817  | 1.223216780664  |
| Ge | -1.089899914406 | 0.202095386273  | -1.409000961937 |
| Ge | -0.541703977950 | 3.120165773611  | -0.093098384173 |

|    |                 |                 |                 |
|----|-----------------|-----------------|-----------------|
| TV | 5.929497262237  | -0.000000000000 | -0.000000000000 |
| TV | -4.834557494961 | 5.832171049485  | -0.000000000000 |
| TV | -0.658823915375 | 4.377001015121  | 3.947760930973  |

# EQ'-GeO<sub>2</sub> 5

|    |                  |                 |                 |
|----|------------------|-----------------|-----------------|
| O  | 5.497767148353   | 0.905389483104  | -0.420969674342 |
| O  | 7.316406604211   | -0.829104245410 | -1.461237016356 |
| O  | -0.472344512051  | 1.982872699108  | 0.779330659311  |
| O  | 4.295628002256   | 5.299472711562  | 0.681621828573  |
| O  | -10.925485843671 | -1.730045494630 | 1.881766392082  |
| O  | -6.620004110255  | 0.283700182464  | -0.316537937797 |
| O  | 5.984223729101   | 3.607481273114  | -0.420821589094 |
| O  | 7.802227252190   | 1.873001410647  | -1.461192151337 |
| O  | 0.013497727704   | 4.685092017920  | 0.779324954518  |
| O  | 4.781492998768   | 8.001749731121  | 0.681590390505  |
| O  | -10.439925939659 | 0.972180777387  | 1.881681098884  |
| O  | -6.134151004803  | 2.985668201228  | -0.316632320833 |
| Ge | 3.507936131156   | 6.836967717038  | 0.137691039885  |
| Ge | -7.474932944577  | 0.445786654047  | 1.324400343094  |
| Ge | 5.564502687885   | 2.289490225433  | 0.730634534694  |
| Ge | -6.989159839649  | 3.147892818193  | 1.324172834373  |
| Ge | 3.021949929065   | 4.134922495836  | 0.137505819596  |
| Ge | 6.050340651718   | 4.991579191908  | 0.730766740536  |
| TV | 7.791135531852   | 0.000000000000  | 0.000000000000  |
| TV | 0.971671382258   | 5.404174114314  | 0.000000000006  |
| TV | -5.150708763029  | 5.126985462272  | 3.239781726237  |

# EQ'-GeO<sub>2</sub> 6

|    |                 |                 |                 |
|----|-----------------|-----------------|-----------------|
| O  | -0.843922026721 | 1.383885946169  | -0.262274764139 |
| O  | 2.646709777085  | -0.095771368185 | -1.185733193652 |
| O  | -3.083397229274 | 1.843798007362  | 0.055192484225  |
| O  | 4.786256418913  | 6.969617585854  | 2.340107732295  |
| O  | -3.315836633829 | -0.229537468665 | 1.099841946648  |
| O  | 0.205233874732  | 0.227247222676  | 1.415547452687  |
| O  | -2.569544025447 | 4.013691302426  | -0.262353151557 |
| O  | 0.921043853477  | 2.534065634750  | -1.185937740555 |
| O  | -4.808942572925 | 4.473594686414  | 0.055356046274  |
| O  | 3.060726096720  | 9.599270513846  | 2.340263942053  |
| O  | -5.041533222763 | 2.400294597164  | 1.099739505306  |
| O  | -1.520450983821 | 2.857144604210  | 1.415637555877  |
| Ge | -3.921224862943 | 4.092266066310  | -1.503917423578 |
| Ge | -1.760162460095 | 0.811453761418  | 1.272412861032  |
| Ge | 1.120964083242  | 0.804273680709  | -0.116913134023 |
| Ge | -3.485822433765 | 3.441184447456  | 1.272413392935  |
| Ge | -2.195572363155 | 1.462325094860  | -1.503961907263 |
| Ge | -0.604669540495 | 3.434089665683  | -0.116924293320 |
| TV | 5.759963320280  | -0.000000000001 | -0.000000000001 |
| TV | -3.451286824677 | 5.259739708126  | -0.000000000000 |
| TV | 0.300301816449  | 3.950887720891  | 4.163703999264  |

# EQ'-GeO<sub>2</sub> 7

|   |                 |                 |                 |
|---|-----------------|-----------------|-----------------|
| O | -1.681889965355 | 1.267104278574  | 1.568850295235  |
| O | -0.123582623338 | -1.337361993097 | -5.138871826831 |
| O | -0.117155905000 | -0.416333093578 | 1.795566444514  |
| O | -1.654270473708 | -2.897181732989 | -0.841305182474 |
| O | -1.677495929387 | 4.076353545396  | 1.005485222171  |
| O | -0.099222692395 | 0.938891354804  | -4.879955027387 |

|    |                 |                 |                 |
|----|-----------------|-----------------|-----------------|
| O  | -0.088308577142 | 2.833325206228  | 2.096153541504  |
| O  | -1.661469446866 | -0.090094439047 | -1.406322211234 |
| O  | -1.651832708567 | 6.351060387699  | 1.266518702856  |
| O  | -0.093799385024 | 3.743692831280  | -5.443436598284 |
| O  | -0.116778500157 | 5.110762018513  | 2.357455486241  |
| O  | -1.688466097971 | 2.183716594749  | -1.147698822374 |
| Ge | -0.104042190053 | 5.284534745740  | 0.476929206687  |
| Ge | 0.677639909196  | -1.655247953130 | 2.888982165604  |
| Ge | -0.111540257674 | 1.120719372739  | 2.888533144721  |
| Ge | -1.673926874781 | -0.269547448563 | 0.475389873926  |
| Ge | -0.889876456438 | 2.507545776323  | 0.475103102361  |
| Ge | 1.462567082069  | -4.432116503719 | 2.887394630663  |
| TV | 3.126065311245  | 0.000000000008  | 0.000000000009  |
| TV | -0.004086188677 | 8.331482424101  | -0.000000000001 |
| TV | -0.000061897154 | 0.004644253786  | 4.824680467035  |

# EQ'-GeO<sub>2</sub> 8

|    |                 |                 |                 |
|----|-----------------|-----------------|-----------------|
| O  | 0.181671313612  | 1.746568192916  | -0.423636032419 |
| O  | 0.931011197957  | 0.598743898117  | -2.612326510561 |
| O  | -2.101718110524 | 1.762812107230  | 0.442288083549  |
| O  | -1.977084536960 | 1.854729282854  | 4.862954407876  |
| O  | -1.231034005985 | 0.707821806517  | 2.670436743105  |
| O  | 1.049832228684  | 0.694100435506  | 1.808511698491  |
| O  | -1.454663869646 | 3.943742907753  | -0.423688512678 |
| O  | -0.705172332375 | 2.795855369822  | -2.612377099876 |
| O  | -3.738192190050 | 3.960042248830  | 0.442270119247  |
| O  | -3.613290393562 | 4.051999792686  | 4.862986249160  |
| O  | -2.867379222270 | 2.905129345566  | 2.670429117910  |
| O  | -0.586453360784 | 2.891343196687  | 1.808614490142  |
| Ge | -0.771269435431 | 4.455052360492  | -3.405711360045 |
| Ge | -0.524967976926 | 1.229521801546  | 1.124337323151  |
| Ge | 1.783706792343  | 1.230971594932  | -1.086763741678 |
| Ge | -2.161311139723 | 3.426707041650  | 1.124282635225  |
| Ge | 0.865031006246  | 2.257848788423  | -3.405767492975 |
| Ge | 0.147387576524  | 3.428163980855  | -1.086782755145 |
| TV | 4.603730918247  | 0.000000000000  | 0.000000000000  |
| TV | -3.272414962916 | 4.394453153779  | 0.000000000000  |
| TV | -3.695652815957 | -1.034233863143 | 6.742326845153  |

# EQ'-GeO<sub>2</sub> 9

|    |                 |                |                 |
|----|-----------------|----------------|-----------------|
| O  | -0.094693244609 | 1.960947806986 | -0.369528101835 |
| O  | 2.318588078358  | 0.270334410314 | -2.486312685868 |
| O  | -2.438867702440 | 1.913559296416 | 0.326568168907  |
| O  | 0.453826128697  | 2.411883301826 | 4.651946401910  |
| O  | -1.690034346776 | 0.716114375695 | 2.534243427727  |
| O  | 0.656711969377  | 0.763761022706 | 1.837881981410  |
| O  | -1.848017948751 | 4.173295238163 | -0.369563243139 |
| O  | 0.565367370000  | 2.482723868777 | -2.486310056958 |
| O  | -4.192181407352 | 4.125956484492 | 0.326581338736  |
| O  | -1.299482985788 | 4.624294385288 | 4.651960370747  |
| O  | -3.443323636060 | 2.928460578553 | 2.534223216689  |
| O  | -1.096574125893 | 2.976170786953 | 1.837866960363  |
| Ge | -2.589690049037 | 3.581435531788 | -3.248459540139 |
| Ge | -0.892017800403 | 1.338523696830 | 1.082829990738  |
| Ge | 1.376218766919  | 1.325196944956 | -1.214894650431 |
| Ge | -2.645311073245 | 3.550885716080 | 1.082814301396  |
| Ge | -0.836408741754 | 1.369049288085 | -3.248455058552 |

|    |                 |                 |                 |
|----|-----------------|-----------------|-----------------|
| Ge | -0.377063344942 | 3.537568624753  | -1.214895510452 |
| TV | 4.558838121273  | -0.000000000000 | 0.000000000000  |
| TV | -3.506589678347 | 4.424733826358  | 0.000000000000  |
| TV | -2.325930725311 | -0.015607935400 | 6.628799066805  |

# EQ'-GeO<sub>2</sub> 10

|    |                 |                 |                 |
|----|-----------------|-----------------|-----------------|
| O  | 0.766550803395  | 2.106021404448  | 0.031442300334  |
| O  | 0.700562012308  | 0.417014890017  | -2.004093099326 |
| O  | -1.684550959617 | 2.104309682846  | 0.013422124039  |
| O  | -1.599322067999 | 2.160964031271  | 4.067812734500  |
| O  | -1.665050564169 | 0.470433527437  | 2.031962354850  |
| O  | 0.788509062420  | 0.472662550598  | 2.054156005375  |
| O  | -0.761433588501 | 4.373967235448  | 0.031417997315  |
| O  | -0.827337437909 | 2.684859244069  | -2.004109636189 |
| O  | -3.212502723537 | 4.372197022914  | 0.013423816912  |
| O  | -3.127311531213 | 4.428831319633  | 4.067794303208  |
| O  | -3.193005286126 | 2.738374120868  | 2.031951077846  |
| O  | -0.739465946051 | 2.740574029680  | 2.054116903669  |
| Ge | -1.135819626097 | 4.125680876915  | -3.095113050812 |
| Ge | -0.447661972762 | 1.288497859068  | 1.033737844038  |
| Ge | 2.009444181918  | 1.295523449042  | -0.992587673618 |
| Ge | -1.975620379971 | 3.556441256126  | 1.033750929186  |
| Ge | 0.392146452983  | 1.857761790706  | -3.095138085399 |
| Ge | 0.481469406846  | 3.563414136214  | -0.992562482720 |
| TV | 4.904368753790  | -0.000000000000 | 0.000000000000  |
| TV | -3.055926357072 | 4.535837419936  | -0.000000000000 |
| TV | -3.298400911916 | -0.574942244797 | 6.152939954187  |

# EQ'-GeO<sub>2</sub> 11

|    |                  |                 |                 |
|----|------------------|-----------------|-----------------|
| O  | 5.121127292172   | -0.164484905079 | -0.965539035547 |
| O  | 7.416006552128   | -0.587785884309 | -1.248595017306 |
| O  | -1.142455691213  | 1.026119133129  | 0.335794683039  |
| O  | 4.334067793266   | 5.811945173139  | 0.748813782803  |
| O  | -11.024067815070 | -1.455805419356 | 1.890870221808  |
| O  | -6.529555108857  | 0.596069729886  | -0.119587897860 |
| O  | 5.630154098309   | 2.640863475877  | -0.965560420655 |
| O  | 7.925014821970   | 2.217581341394  | -1.248542484724 |
| O  | -0.633383241614  | 3.831456965352  | 0.335780984926  |
| O  | 4.843073731976   | 8.617477547106  | 0.748734369511  |
| O  | -10.515078879365 | 1.349542600232  | 1.890915136923  |
| O  | -6.020554546646  | 3.401299798211  | -0.119576847890 |
| Ge | 3.558856346925   | 7.407034528015  | 0.270231126527  |
| Ge | -7.465325833325  | 0.774308468181  | 1.540101094435  |
| Ge | 5.626114146522   | 2.666778405424  | 0.884581812530  |
| Ge | -6.956309071769  | 3.579626216068  | 1.540082721267  |
| Ge | 3.049664637566   | 4.601759037957  | 0.270016608029  |
| Ge | 6.135155999655   | 5.472103546588  | 0.884575108453  |
| TV | 7.721393378556   | -0.000000000000 | -0.000000000000 |
| TV | 1.018046848142   | 5.610669827983  | 0.000000000006  |
| TV | -5.309295949839  | 5.371653206486  | 3.079296780420  |

# EQ'-GeO<sub>2</sub> 12

|   |                 |                 |                 |
|---|-----------------|-----------------|-----------------|
| O | 1.500472288413  | 1.184565920093  | -1.165462489829 |
| O | 1.986570384767  | -1.091525815294 | -1.523272623439 |
| O | -0.069283981245 | 0.747441005607  | 0.564643465072  |
| O | 1.908986459946  | 9.166315541899  | 1.892265211855  |
| O | -3.075643124467 | -1.409291451270 | 0.548315606537  |

|    |                 |                 |                 |
|----|-----------------|-----------------|-----------------|
| O  | -1.216051897802 | -1.877101387966 | 1.908534942638  |
| O  | 4.928670621171  | 1.153150118525  | -1.537830451828 |
| O  | 4.417172663682  | -1.061605476321 | -1.151324325366 |
| O  | 3.360263357624  | 0.717075999942  | 0.192871578955  |
| O  | 4.338810900160  | 9.198130786646  | 2.263407034024  |
| O  | 0.354024436763  | -1.438068564498 | 0.176719692926  |
| O  | 1.211543611076  | -1.849243151406 | 2.279247553809  |
| Ge | 3.256329340826  | 4.667911122225  | -1.539824767605 |
| Ge | -2.880576976866 | -0.962709836884 | 2.282140425048  |
| Ge | 1.696850391750  | 1.631264106350  | 0.568094313462  |
| Ge | -0.039532976240 | -0.517039958467 | 1.888871990146  |
| Ge | 0.415969729037  | 4.225188672809  | -1.149169925937 |
| Ge | 4.537951001748  | 2.076271319335  | 0.174868715836  |
| TV | 5.858496941125  | 0.000000000000  | -0.000000000002 |
| TV | 0.092105976534  | 4.400358560778  | 0.000000000000  |
| TV | -1.738889254140 | 5.421599737579  | 5.145766745700  |

# EQ'-GeO<sub>2</sub> 13

|    |                 |                 |                 |
|----|-----------------|-----------------|-----------------|
| O  | 1.306149820997  | -0.012669172671 | -0.181697837670 |
| O  | -0.820851544045 | -1.770366162935 | -2.462678314104 |
| O  | -0.391526153494 | 0.439711628856  | 2.609551717451  |
| O  | 0.877213713261  | -2.218564581042 | 0.328910333304  |
| O  | -0.506739804106 | 2.193041690080  | -0.181712220588 |
| O  | -2.633729527724 | 0.435346789384  | -2.462666852505 |
| O  | -2.204728414399 | 2.645369538771  | 2.609608131034  |
| O  | -0.935639174543 | -0.012820049444 | 0.328928480524  |
| O  | -2.319608535341 | 4.398761460591  | -0.181696250096 |
| O  | -4.446727534794 | 2.641137283759  | -2.462670297252 |
| O  | -4.017280859168 | 4.851165767596  | 2.609545292021  |
| O  | -2.748518038251 | 2.192893225814  | 0.328940903226  |
| Ge | -3.641439368247 | 3.308499130121  | -0.963254987510 |
| Ge | 0.414941640332  | 1.104240889331  | 1.110769377703  |
| Ge | -1.398066786979 | 3.309884004740  | 1.110791256721  |
| Ge | -0.015581724808 | -1.102975918088 | -0.963307531791 |
| Ge | -1.828459037541 | 1.102735767851  | -0.963312147574 |
| Ge | 2.227796527876  | -1.101513289762 | 1.110723095050  |
| TV | 4.485212128326  | 0.000000000000  | -0.000000000000 |
| TV | -5.438621887314 | 6.617162471254  | -0.000000000003 |
| TV | 0.000662844354  | 0.003514281435  | 4.449881170679  |

# EQ'-GeO<sub>2</sub> 14

|    |                 |                 |                 |
|----|-----------------|-----------------|-----------------|
| O  | 1.378443565428  | 0.024175829454  | 0.542984684140  |
| O  | -0.785498717146 | -1.810470173816 | -1.790140629629 |
| O  | -0.847704623761 | 0.006522183992  | 1.144616096745  |
| O  | 1.475563686420  | -1.759546158265 | -1.144127496943 |
| O  | -0.468006853285 | 2.198199419530  | 0.542990516223  |
| O  | -2.631871507817 | 0.363536234275  | -1.790145731602 |
| O  | -2.694143118521 | 2.180527277671  | 1.144619016088  |
| O  | -0.370807823148 | 0.414466703157  | -1.144129560020 |
| O  | -2.314452861736 | 4.372294305828  | 0.542988152430  |
| O  | -4.478291457349 | 2.537532790690  | -1.790141492385 |
| O  | -4.540577400133 | 4.354526687234  | 1.144624154093  |
| O  | -2.217231793481 | 2.588462275757  | -1.144123899067 |
| Ge | -3.608720142088 | 3.277284145044  | -0.231163281435 |
| Ge | 0.445600294698  | 1.101871667975  | 1.919410654523  |
| Ge | -1.400826313533 | 3.275877985022  | 1.919436604819  |
| Ge | 0.084091882228  | -1.070732595063 | -0.231168592004 |

|    |                 |                 |                 |
|----|-----------------|-----------------|-----------------|
| Ge | -1.762306175734 | 1.103267759484  | -0.231177193930 |
| Ge | 2.292010672570  | -1.072126026239 | 1.919420145901  |
| TV | 4.400102555931  | -0.000000000000 | 0.000000000000  |
| TV | -5.539221021755 | 6.522013361292  | -0.000000000003 |
| TV | -0.868271885959 | -0.747711808337 | 4.622723999693  |

# EQ'-GeO<sub>2</sub> 15

|    |                 |                 |                 |
|----|-----------------|-----------------|-----------------|
| O  | 2.987309030310  | 0.088279885209  | 3.088100061592  |
| O  | 1.291595258888  | -0.420972393384 | 1.565009345710  |
| O  | 0.917748967039  | 1.967436203964  | 1.663452762856  |
| O  | -0.406875265908 | 0.961653326575  | 0.083829690174  |
| O  | 2.647286191657  | 2.455062380861  | 3.307341793647  |
| O  | 3.026795381405  | -1.830232083028 | 0.894816970393  |
| O  | 6.576827143879  | 0.416299529243  | 3.524066553673  |
| O  | 4.803120736276  | -0.776953982252 | 1.832170129053  |
| O  | 4.540248874480  | 1.722788724506  | 2.058777239036  |
| O  | 3.293621028370  | 0.572850821551  | 0.452349771554  |
| O  | 6.199369465331  | 2.833039583134  | 3.582338723397  |
| O  | 5.783891460301  | -1.509798656081 | -0.072708229075 |
| Ge | 7.597452651473  | 3.793916753613  | 3.304496572254  |
| Ge | 2.569883474735  | 1.294849322927  | 1.870613226181  |
| Ge | 3.204392608330  | 0.686082710147  | 4.792750895940  |
| Ge | 5.894552770501  | 0.545250219042  | 1.838689411391  |
| Ge | 4.392431258901  | 3.144552381657  | 3.266636309680  |
| Ge | 6.230763650388  | 1.558831427678  | 4.833653109093  |
| TV | 6.153125111439  | -0.000000000002 | 0.000000000000  |
| TV | -0.098255839153 | 4.824091652117  | -0.000000000000 |
| TV | -1.178916008933 | -1.538428378940 | 4.557933184517  |

# EQ'-GeO<sub>2</sub> 16

|    |                 |                 |                 |
|----|-----------------|-----------------|-----------------|
| O  | 0.041188171737  | 2.088775527025  | -0.392164698954 |
| O  | 2.399493554308  | 0.373060422499  | -2.558660739090 |
| O  | -2.253730036516 | 2.033824332067  | 0.363149367378  |
| O  | -0.909368047630 | 1.313860263674  | 4.844135547268  |
| O  | -1.481862006212 | 0.843498847836  | 2.612143100133  |
| O  | 0.861023099109  | 0.937576131328  | 1.965749785175  |
| O  | -1.744962710744 | 4.271502733799  | -0.392212409360 |
| O  | 0.613475375911  | 2.555767677889  | -2.558643485639 |
| O  | -4.039835500017 | 4.216547221846  | 0.363213047562  |
| O  | -2.695442022876 | 3.496591725877  | 4.844130846423  |
| O  | -3.267985703932 | 3.026209026267  | 2.612180705113  |
| O  | -0.925039570130 | 3.120348545617  | 1.965764747021  |
| Ge | -2.508497301249 | 3.647588769355  | -3.334392542764 |
| Ge | -0.674209179343 | 1.504009555789  | 1.112836003984  |
| Ge | 1.511556755370  | 1.469850428412  | -1.232836359565 |
| Ge | -2.460264421151 | 3.686731830888  | 1.112852951093  |
| Ge | -0.722434171269 | 1.464842038785  | -3.334369965708 |
| Ge | -0.274522497418 | 3.652582729356  | -1.232818537621 |
| TV | 4.458501132429  | -0.000000000000 | -0.000000000000 |
| TV | -3.572107859127 | 4.365491134885  | 0.000000000000  |
| TV | -3.748241982591 | -1.240162905513 | 6.844178957437  |

# EQ'-GeO<sub>2</sub> 17

|   |                 |                 |                 |
|---|-----------------|-----------------|-----------------|
| O | -4.237284830938 | 2.774743554765  | 0.534571214271  |
| O | 1.827558253628  | 1.060457734514  | -1.130623687683 |
| O | -2.043779920967 | 1.325517599398  | 1.186251186144  |
| O | 1.708693504158  | -3.287188151456 | 0.824434487804  |

|    |                 |                  |                 |
|----|-----------------|------------------|-----------------|
| O  | -6.549642720224 | -0.123680843001  | 1.837948284870  |
| O  | -0.484811782249 | -1.837976746961  | 0.172748137332  |
| O  | -4.356146459855 | -1.572884499234  | 2.489620481922  |
| O  | -0.603666706206 | -6.185610095844  | 2.127803902447  |
| O  | -8.862008589530 | -3.022105318226  | 3.141292612471  |
| O  | -2.797153609110 | -4.736402309660  | 1.476117548566  |
| O  | -6.668488872557 | -4.471313784583  | 3.792976543474  |
| O  | -2.916017620378 | -9.084039288759  | 3.431145913419  |
| Ge | -1.383304395191 | -4.603255821488  | 2.634740394026  |
| Ge | 1.864591423920  | -10.701919245247 | 0.679704768330  |
| Ge | -0.447759715302 | -13.600331115835 | 1.983053746860  |
| Ge | 3.241419025824  | 1.193587135418   | 0.028016241784  |
| Ge | 0.929058290674  | -1.704820591953  | 1.331374740230  |
| Ge | 4.176953625554  | -7.803486425437  | -0.623665338413 |
| TV | 6.699372315396  | -0.000000000001  | 0.000000000006  |
| TV | -1.564520566172 | 5.223144511115   | -0.000000000004 |
| TV | -6.937078715507 | -8.695281740438  | 3.910083719502  |

# EQ'-GeO<sub>2</sub> 18

|    |                  |                 |                 |
|----|------------------|-----------------|-----------------|
| O  | 5.170057817652   | -0.193554691712 | -0.711883283846 |
| O  | 7.806680624578   | -0.637372948212 | -0.715944788531 |
| O  | -1.233982156920  | 1.253888537505  | 0.112962167799  |
| O  | 4.845956947709   | 6.135643889611  | 0.433059072543  |
| O  | -12.277061444486 | -2.493078061316 | 1.383607819426  |
| O  | -6.776607868288  | 0.814760770914  | 0.109614016314  |
| O  | 5.951389547522   | 3.188040896111  | -0.711733930239 |
| O  | 8.588026939383   | 2.744104022750  | -0.716267925961 |
| O  | -0.452806547350  | 4.635177229260  | 0.112891079569  |
| O  | 5.627334223640   | 9.517096396907  | 0.433095412339  |
| O  | -11.495748827392 | 0.888411528216  | 1.383347146974  |
| O  | -5.995304822414  | 4.196311073027  | 0.109824901067  |
| Ge | 4.586802504215   | 7.963959204832  | 0.863220324907  |
| Ge | -8.194665980519  | 0.130762328508  | 0.909085641644  |
| Ge | 5.898203503709   | 2.441637605137  | 0.952988059583  |
| Ge | -7.413476299343  | 3.512125948712  | 0.908858066234  |
| Ge | 3.805512881950   | 4.582538049239  | 0.863523670864  |
| Ge | 6.679487532498   | 5.823045577122  | 0.952848495582  |
| TV | 8.176688071925   | -0.000000000000 | 0.000000000000  |
| TV | 1.562681702248   | 6.762994275772  | 0.000000000006  |
| TV | -5.046391259479  | 6.409749839554  | 2.421344359495  |

# EQ'-GeO<sub>2</sub> 19

|    |                  |                 |                 |
|----|------------------|-----------------|-----------------|
| O  | 6.358273480637   | -0.167619493157 | -0.694486122899 |
| O  | 8.646641588473   | -1.342745578273 | -0.653090080805 |
| O  | -2.957751648512  | -1.830069747621 | 0.924878628432  |
| O  | 6.757701324801   | 7.558910846661  | -0.708673025302 |
| O  | -14.053789127595 | -0.743028327279 | 0.912279005474  |
| O  | -7.678171310839  | 0.430940407430  | 0.868572007881  |
| O  | 7.779902972410   | 3.167808130154  | -0.694379660572 |
| O  | 10.068098838012  | 1.992786698754  | -0.652976224148 |
| O  | -1.535550639721  | 1.505054573790  | 0.925031758016  |
| O  | 8.179332744288   | 10.893668027972 | -0.708141512230 |
| O  | -12.632251331920 | 2.592313959906  | 0.912403091753  |
| O  | -6.256621229062  | 3.766498935316  | 0.868745581207  |
| Ge | 5.940159105935   | 8.903222756087  | 0.087095593595  |
| Ge | -7.966167586217  | -0.399576335056 | 2.494137459916  |
| Ge | 6.237404021772   | 2.866038917105  | 0.105430362513  |

|    |                 |                |                |
|----|-----------------|----------------|----------------|
| Ge | -6.544687521671 | 2.936051776469 | 2.494356006901 |
| Ge | 4.518722813878  | 5.567691631213 | 0.086912954730 |
| Ge | 7.658808122287  | 6.201950135411 | 0.105000121801 |
| TV | 8.661067490292  | 0.000000000000 | 0.000000000000 |
| TV | 2.843248450679  | 6.670801446552 | 0.000000000004 |
| TV | -4.422084499383 | 6.090581588285 | 2.370511784948 |

# EQ'-GeO<sub>2</sub> 20

|    |                 |                 |                 |
|----|-----------------|-----------------|-----------------|
| O  | 0.263413761667  | 1.047749200948  | 0.934778587151  |
| O  | 3.227241312546  | -0.689141571032 | -1.439126046063 |
| O  | -3.518133418617 | 1.838860145971  | -0.388482298950 |
| O  | 2.136931709446  | 9.571666084980  | 1.642423632181  |
| O  | -1.391966431148 | -0.756955942248 | 0.622182683906  |
| O  | 1.430224183143  | -0.479835347013 | -0.106802534944 |
| O  | -4.093213619381 | 5.554840343941  | 0.834237074281  |
| O  | -0.439581756753 | 3.589215576223  | -0.903640912468 |
| O  | -6.929104959714 | 5.806776627782  | 0.112635336978  |
| O  | -1.526793448359 | 13.847987990371 | 2.184193538234  |
| O  | -4.818648194428 | 3.203292593441  | 1.121235177449  |
| O  | -2.904169263697 | 3.997465245564  | -0.179442464435 |
| Ge | -5.669067832244 | 4.673364591572  | 0.532984398224  |
| Ge | 0.305889842538  | -0.843536615063 | 1.320316266019  |
| Ge | 0.399962583517  | 2.058682505102  | -0.465242114728 |
| Ge | -3.046023330480 | 2.974923575018  | 1.213040180815  |
| Ge | -2.668180002039 | 0.364963758121  | 0.208369334445  |
| Ge | -2.944620994597 | 5.887921258677  | -0.570563891793 |
| TV | 5.691326169268  | -0.000000000000 | 0.000000000002  |
| TV | -7.039451007657 | 8.126204227393  | 0.000000000007  |
| TV | 1.217678108389  | 4.253108795502  | 2.880271654366  |

# EQ'-GeO<sub>2</sub> 21

|    |                 |                 |                 |
|----|-----------------|-----------------|-----------------|
| O  | -0.622639276057 | 1.765658169339  | 0.497372197166  |
| O  | 4.605107413035  | 0.202373898516  | 0.310732708429  |
| O  | -4.404521178253 | 2.182743600516  | -0.403277991351 |
| O  | 10.898881975603 | 5.384280395539  | 2.021119129422  |
| O  | -6.626881220846 | -1.721891127464 | 0.352318848983  |
| O  | -1.710520660244 | -0.178702979550 | 1.289535146402  |
| O  | -0.565014755912 | 3.387471829695  | 2.176038894883  |
| O  | 5.114386461467  | 1.964183162443  | 1.735943638045  |
| O  | -4.088674805494 | 3.891370169540  | 2.459842318301  |
| O  | 10.958302082670 | 7.012979397664  | 3.699788235484  |
| O  | -5.661266475137 | 0.186380987975  | 2.906046242125  |
| O  | -0.743374493785 | 1.732353192850  | 3.844462710228  |
| Ge | -2.267986131113 | 4.456138850530  | 2.140782055780  |
| Ge | -3.913387983679 | 0.733799404789  | 0.774260246234  |
| Ge | 2.034552763737  | -0.607128243183 | 0.291648260116  |
| Ge | -4.370734645396 | 2.204648366252  | 3.421590622847  |
| Ge | -1.833143545706 | 2.986170627361  | -0.380608280482 |
| Ge | 3.295202635318  | 1.393858735255  | 2.056458623187  |
| TV | 10.221402439922 | -0.000000000001 | -0.000000000000 |
| TV | -0.911964088125 | 2.921526504087  | 0.000000000002  |
| TV | 0.825036488245  | 3.475432773036  | 4.285779689277  |

# EQ'-GeO<sub>2</sub> 22

|   |                 |                |                 |
|---|-----------------|----------------|-----------------|
| O | -0.404042618780 | 1.972514845851 | -0.816722548387 |
| O | 3.461447527692  | 0.630715812193 | -0.125931113925 |
| O | -2.509665751948 | 2.347084742728 | 1.246147681468  |



|    |                 |                 |                 |
|----|-----------------|-----------------|-----------------|
| O  | 0.116005256209  | 1.586770468570  | 2.530631372330  |
| O  | -1.956490957001 | 0.520616488435  | 2.346372959664  |
| O  | 1.184853597184  | 1.218555129456  | 0.682736526074  |
| O  | -2.023768618055 | 4.020835178543  | -0.517381030793 |
| O  | 1.680807738558  | 2.889726680647  | -1.065570276643 |
| O  | -4.301174531836 | 4.606777197691  | 0.291263499954  |
| O  | -2.011322464615 | 4.577278594457  | 2.558329675701  |
| O  | -4.082379868733 | 3.494906108339  | 2.373295865863  |
| O  | -0.426556777165 | 3.246410456282  | 0.977946982508  |
| Ge | -2.854019653445 | 3.672387193120  | -2.075318953422 |
| Ge | -0.939275415444 | 1.431053297647  | 0.861966575283  |
| Ge | 1.999073213660  | 1.165818477767  | -0.896195618367 |
| Ge | -2.846274301521 | 4.062932968705  | 1.059561655965  |
| Ge | -0.695098632159 | 1.675839578421  | -2.504697614357 |
| Ge | 0.096685644208  | 3.798889198093  | -0.697938327638 |
| TV | 5.830450101868  | 0.000000000000  | -0.000000000000 |
| TV | -3.802031054861 | 4.825320311124  | 0.000000000000  |
| TV | -3.118674284191 | -0.126832454064 | 4.742666672086  |

# EQ'-GeO<sub>2</sub> 23

|    |                 |                 |                 |
|----|-----------------|-----------------|-----------------|
| O  | 0.576815301236  | -0.377704178977 | 0.934818216535  |
| O  | 0.329631338758  | -0.462281497954 | -2.749247877153 |
| O  | 0.231990347891  | -0.494819893533 | 3.114059345227  |
| O  | -0.282833553753 | -2.107447446844 | -1.019629862228 |
| O  | -0.280612881196 | 2.233307136671  | 0.934844965387  |
| O  | -0.527892092932 | 2.148689423775  | -2.749231098508 |
| O  | -0.625490168826 | 2.116066633101  | 3.114108037296  |
| O  | -1.140327527586 | 0.503484060177  | -1.019571140589 |
| O  | -1.138091933086 | 4.844245442133  | 0.934859551265  |
| O  | -1.385304321110 | 4.759729732619  | -2.749201629692 |
| O  | -1.482965030636 | 4.727161600720  | 3.114056393161  |
| O  | -1.997770594480 | 3.114521441007  | -1.019660299815 |
| Ge | -1.261891521340 | 4.802460887421  | -0.906940430696 |
| Ge | 1.312749992955  | 1.310240360750  | 1.047421846673  |
| Ge | 0.455293935587  | 3.921235410309  | 1.047452531166  |
| Ge | 0.453068353277  | -0.419490024763 | -0.906994598614 |
| Ge | -0.404460364953 | 2.191470713019  | -0.906960869863 |
| Ge | 2.170180496750  | -1.300750834611 | 1.047421899955  |
| TV | 4.391543346370  | -0.000000000000 | -0.000000000000 |
| TV | -2.572409198830 | 7.832990564865  | -0.000000000003 |
| TV | -0.957298518063 | -1.762361138901 | 3.908870079748  |

# EQ'-GeO<sub>2</sub> 24

|    |                  |                 |                 |
|----|------------------|-----------------|-----------------|
| O  | 6.019372363244   | 0.836754061962  | -0.750646710083 |
| O  | 8.556845725773   | -0.063469914164 | -0.724690768014 |
| O  | -0.992988823023  | 1.959076280483  | 0.141998618490  |
| O  | 5.940910605059   | 5.230194491590  | 0.442792976815  |
| O  | -14.242567132809 | -2.797792558155 | 1.398934699775  |
| O  | -7.333468618025  | 0.924289039368  | 0.086085542423  |
| O  | 7.365931933505   | 3.853276118246  | -0.750645709236 |
| O  | 9.903411428558   | 2.953058438401  | -0.724688665248 |
| O  | 0.353559536714   | 4.975594762582  | 0.142000835130  |
| O  | 7.287450132031   | 8.246716646916  | 0.442786511511  |
| O  | -12.896014928389 | 0.218725685969  | 1.398940498925  |
| O  | -5.986914425249  | 3.940812779324  | 0.086080585488  |
| Ge | 5.976250865832   | 7.017303753921  | 0.877443335169  |
| Ge | -8.873510954105  | 0.646004610580  | 0.906904599773  |

|    |                 |                |                 |
|----|-----------------|----------------|-----------------|
| Ge | 6.354466689748  | 1.430363404492 | 0.957724527894  |
| Ge | -7.526953185069 | 3.662530572267 | 0.906907066038  |
| Ge | 4.629704922498  | 4.000787623871 | 0.877438534829  |
| Ge | 7.701021670356  | 4.446880473435 | 0.957729466604  |
| TV | 8.968610000461  | 0.000000000000 | -0.000000000000 |
| TV | 2.693099485442  | 6.033039960877 | 0.000000000006  |
| TV | -4.805013454126 | 5.387528691916 | 2.462607030130  |

# EQ'-GeO<sub>2</sub> 25

|    |                 |                 |                 |
|----|-----------------|-----------------|-----------------|
| O  | 6.288229338250  | 0.557121884639  | 0.371168156818  |
| O  | 6.948952936851  | -2.093149500248 | -1.414273728693 |
| O  | -2.769599412196 | 4.272466605357  | -0.577262848032 |
| O  | 4.619183999301  | 5.784244970047  | 1.008677922088  |
| O  | -9.352315513205 | -1.059056641575 | 1.956850715156  |
| O  | -6.640796277038 | -0.787213911783 | -0.077893113734 |
| O  | 7.166987989424  | 3.684311758352  | 0.371153765449  |
| O  | 7.827816893410  | 1.034051227680  | -1.414282516326 |
| O  | -1.890770665468 | 7.399688938415  | -0.577266293988 |
| O  | 5.497928051135  | 8.911450004063  | 1.008655004692  |
| O  | -8.473544339520 | 2.068125622125  | 1.956843526890  |
| O  | -5.762018412686 | 2.339985123441  | -0.077888258850 |
| Ge | 3.738476527582  | 6.812085352696  | -0.255171359917 |
| Ge | -7.595751495558 | -0.468900952486 | 1.634655509911  |
| Ge | 5.454332226693  | 3.169416454788  | 0.689859343005  |
| Ge | -6.716973464404 | 2.658297151316  | 1.634621893779  |
| Ge | 2.859625841503  | 3.684881926950  | -0.255199595801 |
| Ge | 6.333198668339  | 6.296638286564  | 0.689847823825  |
| TV | 7.383764901369  | 0.000000000000  | 0.000000000000  |
| TV | 1.757632105176  | 6.254413268434  | 0.000000000006  |
| TV | -5.044048039253 | 6.096757744160  | 2.872539417392  |

# EQ'-GeO<sub>2</sub> 26

|    |                 |                 |                 |
|----|-----------------|-----------------|-----------------|
| O  | -1.050644577483 | 1.318577996965  | 0.305412972202  |
| O  | 2.331215591763  | 0.045064659326  | -0.961819578257 |
| O  | -3.001248543046 | 2.224063198684  | -0.375518590687 |
| O  | 4.554141955260  | 8.036951930956  | 2.163857857408  |
| O  | -2.426964717160 | -0.680912195770 | 1.581943277704  |
| O  | 1.067803185346  | 0.224860032938  | 0.893941496153  |
| O  | -3.063542456675 | 4.586565741915  | 0.305472541283  |
| O  | 0.318277588575  | 3.313039784683  | -0.961834324504 |
| O  | -5.014128982436 | 5.492016322237  | -0.375536202569 |
| O  | 2.541234481653  | 11.304926877972 | 2.163843287201  |
| O  | -4.439867224252 | 2.587081773479  | 1.581953059040  |
| O  | -0.945048644660 | 3.492859523958  | 0.893922208226  |
| Ge | -3.376657125936 | 3.763410595231  | -1.308622778313 |
| Ge | -0.681308554488 | -0.220879791856 | 1.240001110757  |
| Ge | 0.697346745592  | 1.767971395990  | -0.035947117389 |
| Ge | -2.694196410248 | 3.047119827218  | 1.240009443926  |
| Ge | -1.363731135576 | 0.495389593183  | -1.308643866528 |
| Ge | -1.315544117774 | 5.035965766940  | -0.035945933189 |
| TV | 5.445121793490  | -0.000000000001 | 0.000000000000  |
| TV | -4.025812087945 | 6.535981509241  | 0.000000000004  |
| TV | 0.738592444344  | 3.815922630284  | 3.816732117321  |

# EQ'-GeO<sub>2</sub> 27

|   |                 |                |                 |
|---|-----------------|----------------|-----------------|
| O | -1.403385119757 | 1.472646608692 | 0.192270372800  |
| O | 2.138905821157  | 0.406859435766 | -1.183252879097 |

|    |                 |                 |                 |
|----|-----------------|-----------------|-----------------|
| O  | -3.374635122268 | 2.334967885120  | -0.275709807283 |
| O  | 4.548219943868  | 8.200342779670  | 2.224251345094  |
| O  | -2.751790613502 | -0.444186999411 | 1.705752990871  |
| O  | 0.769034375573  | 0.493918584208  | 0.698888906309  |
| O  | -3.298309625185 | 4.682625482308  | 0.192264162745  |
| O  | 0.244001918436  | 3.616886025207  | -1.183251996059 |
| O  | -5.269540920184 | 5.544992145767  | -0.275698856467 |
| O  | 2.653306305506  | 11.410359379572 | 2.224281670708  |
| O  | -4.646717968100 | 2.765813343520  | 1.705755016734  |
| O  | -1.125876297263 | 3.703939629539  | 0.698912771495  |
| Ge | -3.341966153494 | 3.706996504736  | -1.468782614342 |
| Ge | -0.989168361917 | 0.015250105619  | 1.198818553695  |
| Ge | 2.100761276480  | -0.955227639092 | 0.021971348630  |
| Ge | -2.884092810429 | 3.225246183180  | 1.198808656916  |
| Ge | -1.447056751151 | 0.496997361028  | -1.468761486286 |
| Ge | 0.205844786686  | 2.254805647499  | 0.021979154787  |
| TV | 5.411515171559  | 0.000000000000  | -0.000000000000 |
| TV | -3.789851221461 | 6.420011050222  | 0.000000000000  |
| TV | 0.864972153147  | 3.723336463111  | 3.855091127256  |

# EQ'-GeO<sub>2</sub> 28

|    |                  |                 |                 |
|----|------------------|-----------------|-----------------|
| O  | 5.133776288146   | -0.880184909193 | -0.796094259705 |
| O  | 8.606127582455   | -0.238667889293 | -1.007698530676 |
| O  | -1.118775949932  | 0.497384438040  | 0.462950770514  |
| O  | 4.431199161674   | 6.092996875753  | -0.084707009009 |
| O  | -11.473540163905 | -1.718582415876 | 1.238080111129  |
| O  | -6.684437354607  | 1.403492566108  | 0.711297219840  |
| O  | 5.791384335336   | 2.155988038522  | -0.796122765272 |
| O  | 9.263718029274   | 2.797453675728  | -1.007724269080 |
| O  | -0.461195268068  | 3.533597907628  | 0.462973298837  |
| O  | 5.088777019649   | 9.129185027655  | -0.084717284525 |
| O  | -10.815926497483 | 1.317580301616  | 1.238049026393  |
| O  | -6.026851925825  | 4.439656587966  | 0.711285515401  |
| Ge | 3.941811565393   | 7.778637109590  | 0.223512769937  |
| Ge | -7.478286809164  | -0.031457065911 | 1.681745511675  |
| Ge | 5.479129874187   | 2.659258079789  | 0.907489027943  |
| Ge | -6.820676477414  | 3.004716711140  | 1.681770646598  |
| Ge | 3.284189469965   | 4.742480597006  | 0.223499442625  |
| Ge | 6.136713671338   | 5.695414883459  | 0.907506723675  |
| TV | 7.580405590873   | -0.000000000000 | -0.000000000000 |
| TV | 1.315184122735   | 6.072358617962  | 0.000000000006  |
| TV | -5.400109907769  | 5.929042880873  | 2.907248803630  |

# EQ'-GeO<sub>2</sub> 29

|    |                 |                |                 |
|----|-----------------|----------------|-----------------|
| O  | 1.397081441622  | 1.957675528657 | -0.416790296587 |
| O  | 2.418096347278  | 0.537117411806 | -2.628745464264 |
| O  | -0.747609627349 | 2.025132540955 | 0.343331815486  |
| O  | -3.335679378886 | 4.296321961690 | 5.056170111956  |
| O  | -1.944395635221 | 0.693932395190 | 1.750515361331  |
| O  | 0.331599978109  | 0.725549370934 | 2.686435922011  |
| O  | -2.270266395250 | 4.124394836729 | -0.377009964920 |
| O  | 0.762145502467  | 2.910378871145 | -2.838536243386 |
| O  | -4.409365441250 | 4.114782314762 | 0.433519891988  |
| O  | -6.197325828296 | 6.544642598752 | 5.109745099902  |
| O  | -3.185176110777 | 2.795105906942 | 1.993677554465  |
| O  | -1.042206548569 | 2.650812207300 | 2.635757569810  |
| Ge | -2.062463480874 | 2.111698282060 | -3.441617274455 |

|    |                 |                 |                 |
|----|-----------------|-----------------|-----------------|
| Ge | 0.718220664065  | 1.203458614455  | 1.046707285222  |
| Ge | 2.948189414678  | 1.143804694515  | -1.054614108127 |
| Ge | -1.651124373605 | 3.405273771421  | 1.150144686931  |
| Ge | -0.178756443131 | -0.001620194970 | -3.564388076021 |
| Ge | 0.525155747717  | 3.356998235589  | -1.124246508971 |
| TV | 4.342112271755  | 0.000000000003  | -0.000000000003 |
| TV | -4.314355132232 | 4.384932852358  | -0.000000000002 |
| TV | -6.455542053342 | 1.509154616514  | 6.958653384352  |

# EQ'-GeO<sub>2</sub> 30

|    |                  |                 |                 |
|----|------------------|-----------------|-----------------|
| O  | 5.940935192706   | 1.118325252206  | -1.001656849865 |
| O  | 8.530700847700   | 0.094918372520  | -1.003030586461 |
| O  | -1.120423825836  | 1.995524622541  | -0.163163337697 |
| O  | 5.885013728202   | 4.709099718233  | 1.447887281977  |
| O  | -13.370227875753 | -3.639931838575 | 2.290213043106  |
| O  | -7.388426453357  | 0.971741181740  | -0.163043703549 |
| O  | 7.050582461030   | 4.193412418238  | -1.001656884469 |
| O  | 9.640351143654   | 3.170000243870  | -1.003028196066 |
| O  | -0.010767700999  | 5.070610382969  | -0.163166598247 |
| O  | 6.994669724577   | 7.784187696307  | 1.447893321717  |
| O  | -12.260578389334 | -0.564853335395 | 2.290201689775  |
| O  | -6.278776738708  | 4.046832250851  | -0.163045866236 |
| Ge | 5.339348925829   | 7.454577656288  | 0.643294395813  |
| Ge | -9.427319484520  | -0.746621005802 | 0.642954650535  |
| Ge | 6.806458859284   | 3.348602236910  | 0.643098888552  |
| Ge | -8.317671838934  | 2.328468355295  | 0.642962604337  |
| Ge | 4.229694967421   | 4.379494423583  | 0.643290682216  |
| Ge | 7.916110308620   | 6.423685760000  | 0.643091410834  |
| TV | 8.855427948850   | -0.000000000000 | -0.000000000001 |
| TV | 2.219302469294   | 6.150181323390  | 0.000000000012  |
| TV | -5.224123712214  | 5.640259518828  | 2.451632640611  |

# EQ'-GeO<sub>2</sub> 31

|    |                 |                 |                 |
|----|-----------------|-----------------|-----------------|
| O  | 0.650566964062  | 2.067961063505  | -0.325053122074 |
| O  | 0.733697032762  | -1.458503054624 | -2.645906974886 |
| O  | -0.844075529036 | 3.656776506108  | 0.211894128896  |
| O  | 1.384955590166  | 2.904132914117  | 4.957963864320  |
| O  | -0.774235607805 | -0.436921376654 | 2.759922435678  |
| O  | 0.648934210347  | 1.160948669646  | 1.827320452522  |
| O  | 3.605843795015  | 2.067956064058  | -0.325009696374 |
| O  | 3.688983448472  | -1.458570102796 | -2.645908314177 |
| O  | 2.111174419967  | 3.656730768562  | 0.211994732097  |
| O  | 4.340229823224  | 2.904050620067  | 4.957930632737  |
| O  | 2.181051359399  | -0.436950363574 | 2.759957588495  |
| O  | 3.604281840824  | 1.160935819571  | 1.827323667334  |
| Ge | 2.151391633017  | 1.451086240023  | -3.571056883875 |
| Ge | -0.817482774180 | 2.075196682078  | 1.065137915505  |
| Ge | 0.689110842171  | 0.469217935265  | -1.166052287094 |
| Ge | 2.137807978354  | 2.075170748769  | 1.065165632616  |
| Ge | -0.803854031990 | 1.451102637713  | -3.571036431021 |
| Ge | 3.644361274887  | 0.469196904202  | -1.166090029437 |
| TV | 5.910571487463  | 0.000000000000  | 0.000000000002  |
| TV | -0.043921322188 | 3.199966191603  | -0.000000000000 |
| TV | -0.737777640747 | -0.384346909735 | 7.045758901539  |

# EQ'-GeO<sub>2</sub> 32

|   |                 |                |                |
|---|-----------------|----------------|----------------|
| O | -1.648925952347 | 1.766395287327 | 0.761522334574 |
|---|-----------------|----------------|----------------|

|    |                 |                 |                 |
|----|-----------------|-----------------|-----------------|
| O  | -0.123221122564 | -0.806660118909 | -2.860518255153 |
| O  | 1.430627024654  | 0.196931503195  | 3.345890278221  |
| O  | -0.117797077174 | -3.438939524678 | -0.717143920887 |
| O  | -3.184456005023 | 5.086683563582  | 0.865634342709  |
| O  | -1.654704528111 | 1.450830323856  | -3.197355035824 |
| O  | -0.106245196455 | 2.458763599034  | 3.016256010752  |
| O  | -1.655780845057 | -0.128861652113 | -0.622506104522 |
| O  | -4.721352810019 | 7.348555139349  | 0.536008262368  |
| O  | -3.192714872142 | 4.760897049041  | -3.102772029202 |
| O  | -1.639157870677 | 5.683592799762  | 3.241724095325  |
| O  | -3.191587945402 | 3.110529018450  | -0.380264858432 |
| Ge | -3.183749120064 | 4.685515632300  | -1.237851067388 |
| Ge | 1.431336173841  | -0.204238823581 | 1.242390804611  |
| Ge | -0.109150277684 | 2.773872880016  | 1.314867315664  |
| Ge | -0.118933642419 | -1.143328472034 | -1.165382309953 |
| Ge | -1.655260799674 | 1.848085105429  | -1.097968316532 |
| Ge | 2.959788993418  | -3.041665662411 | 1.382240601530  |
| TV | 3.078131755558  | -0.000000000002 | -0.000000000007 |
| TV | -4.605296293237 | 8.806953191036  | -0.000000000004 |
| TV | 1.546700980519  | -0.972548961784 | 4.960457712101  |

# EQ'-GeO<sub>2</sub> 33

|    |                 |                 |                 |
|----|-----------------|-----------------|-----------------|
| O  | -0.035698487316 | 1.218374132398  | -0.777379072385 |
| O  | -0.347383364253 | 1.415004694040  | -4.061470486037 |
| O  | -0.151314892947 | 2.999144034822  | 0.486705719808  |
| O  | 0.115179756156  | 1.129742242337  | 6.557482326409  |
| O  | 0.445832126008  | 0.942314344431  | 3.704261873471  |
| O  | -0.226496567379 | -0.371572495584 | 2.073088336819  |
| O  | 2.447618987194  | 1.448771673845  | -0.909865579730 |
| O  | 2.775512405784  | 1.256442986532  | -3.761922380219 |
| O  | 3.124598801086  | 2.754306345151  | 0.721141543742  |
| O  | 3.240950052182  | 0.973531596216  | 6.859372208042  |
| O  | 2.926981106474  | 1.162450693972  | 3.574374567023  |
| O  | 3.043379034018  | -0.619542529171 | 2.309961716548  |
| Ge | 2.671313988791  | 3.031327143267  | -4.561392369268 |
| Ge | 0.046567608558  | 1.174938341637  | 1.120677580688  |
| Ge | 1.199217988141  | 0.485556943847  | -1.844903690562 |
| Ge | 2.849231458949  | 1.207759242530  | 1.674685772418  |
| Ge | -0.145006442187 | 3.002915201092  | -4.968413699065 |
| Ge | 4.014155315099  | 0.510749847933  | -1.436347005275 |
| TV | 5.721395231125  | 0.000000000000  | -0.000000000000 |
| TV | 1.511967743291  | 2.515410090198  | 0.000000000000  |
| TV | -0.976284292096 | -1.127241267707 | 9.200966127713  |

# EQ'-GeO<sub>2</sub> 34

|   |                 |                 |                 |
|---|-----------------|-----------------|-----------------|
| O | 0.659500478241  | 1.379373100462  | -0.926399447865 |
| O | -0.709129499086 | -1.165223324072 | -4.206352656822 |
| O | 0.830359532529  | 2.961958717208  | 0.549246099809  |
| O | 2.158257797647  | 2.141164340645  | 7.034675894300  |
| O | -0.598634819907 | 0.445088634607  | 3.780715019939  |
| O | 0.781925534448  | 1.298564313514  | 2.326368289104  |
| O | 3.416776974755  | 1.392249325549  | -0.948511349898 |
| O | 2.036023491035  | -1.145299928094 | -4.177920639904 |
| O | 3.624143982988  | 2.953376327250  | 0.544606669067  |
| O | 4.970401855428  | 2.124036134418  | 7.041029580977  |
| O | 2.210425598274  | 0.427106079724  | 3.764498468001  |
| O | 3.549882878100  | 1.305930569806  | 2.323883347620  |

|    |                 |                 |                 |
|----|-----------------|-----------------|-----------------|
| Ge | 2.189993569150  | 2.143508522298  | -5.096008647601 |
| Ge | -0.582659574558 | 2.130076927851  | 1.456705755196  |
| Ge | -0.765273415934 | 0.556625821672  | -1.784833592884 |
| Ge | 2.197018382657  | 2.129569888630  | 1.422622697946  |
| Ge | -0.589265155347 | 2.144354627567  | -5.035629792665 |
| Ge | 2.010074232175  | 0.557058597000  | -1.840198383055 |
| TV | 5.556362406984  | 0.000000000000  | 0.000000000002  |
| TV | 1.499316188173  | 2.469123142255  | 0.000000000000  |
| TV | 0.082745827786  | -0.065323494571 | 9.748632582535  |

# EQ'-GeO<sub>2</sub> 35

|    |                 |                 |                 |
|----|-----------------|-----------------|-----------------|
| O  | 0.380075078180  | 0.369324955756  | 0.820221991005  |
| O  | 0.378564754354  | -1.189278586457 | -3.915365505520 |
| O  | 0.384527250602  | 0.521648214467  | 4.074656054296  |
| O  | 0.378211121402  | -2.661205228849 | -0.661315442233 |
| O  | -1.065137412598 | 2.738685237958  | 0.820246977046  |
| O  | -1.066655648793 | 1.180039218991  | -3.915383224455 |
| O  | -1.060751371884 | 2.890995309604  | 4.074663616929  |
| O  | -1.067018811990 | -0.291849549784 | -0.661295858403 |
| O  | -2.510385722572 | 5.108018868777  | 0.820240843797  |
| O  | -2.511886934314 | 3.549383840087  | -3.915367680445 |
| O  | -2.505971904321 | 5.260381492350  | 4.074673155573  |
| O  | -2.512264072617 | 2.077532194448  | -0.661318804169 |
| Ge | -2.510181022228 | 3.665509545371  | -1.565369134308 |
| Ge | 0.382393474109  | 1.963058702936  | 1.688691255789  |
| Ge | -1.062841821493 | 4.332424508160  | 1.688749146379  |
| Ge | 0.380311120934  | -1.073195643846 | -1.565298994017 |
| Ge | -1.064923046000 | 1.296148604727  | -1.565361904527 |
| Ge | 1.827616533881  | -0.406295413988 | 1.688705655190  |
| TV | 2.896064495333  | -0.000000000000 | 0.000000000000  |
| TV | -4.335719942077 | 7.108063282042  | -0.000000000003 |
| TV | 0.001181920817  | 0.001088535401  | 6.508272587501  |

# EQ'-GeO<sub>2</sub> 36

|    |                 |                 |                 |
|----|-----------------|-----------------|-----------------|
| O  | 0.717286537883  | -0.595375672183 | -1.769949770842 |
| O  | -0.731075372981 | -1.411396141847 | -3.554963512336 |
| O  | 2.169706629634  | 2.225210987190  | 6.285304755393  |
| O  | 0.715198863871  | -2.034560105216 | 1.520548699853  |
| O  | -0.725472614387 | 1.761216799569  | -1.769958337353 |
| O  | -2.173830005718 | 0.944996415163  | -3.554882978225 |
| O  | 0.727012178656  | 4.581683419595  | 6.285330889438  |
| O  | -0.727631227702 | 0.321862853970  | 1.520481047708  |
| O  | -2.168163831402 | 4.117677054083  | -1.770008046712 |
| O  | -3.616583049505 | 3.301462642601  | -3.554967488803 |
| O  | -0.715794325327 | 6.938132647785  | 6.285337558032  |
| O  | -2.170322540278 | 2.678346247524  | 1.520570454361  |
| Ge | -2.171200539101 | 2.530651637236  | -2.661245769095 |
| Ge | -0.724531578480 | 1.907016720795  | 0.621911230417  |
| Ge | -2.167249112344 | 4.263473271283  | 0.621896585042  |
| Ge | 0.714339490246  | -2.182278556909 | -2.661317268031 |
| Ge | -0.728431480094 | 0.174187643695  | -2.661199365588 |
| Ge | 0.718242883408  | -0.449436222504 | 0.621883464451  |
| TV | 2.892306679302  | -0.000000000001 | -0.000000000001 |
| TV | -4.328300322184 | 7.069348517438  | -0.000000000000 |
| TV | 1.450363059306  | 1.091492435380  | 6.564803119618  |

# EQ'-GeO<sub>2</sub> 37

|    |                 |                 |                 |
|----|-----------------|-----------------|-----------------|
| O  | 2.049254617268  | -1.121465423405 | 0.401347045561  |
| O  | -0.848537786948 | -1.048090084493 | -2.835558134889 |
| O  | 0.546079983500  | -0.208285922650 | 1.933784682727  |
| O  | 0.595838017300  | -1.929063036518 | -1.391015232727 |
| O  | 4.819727459847  | -1.121471976511 | 0.401340532149  |
| O  | 1.921936803274  | -1.048100235405 | -2.835566999076 |
| O  | 3.316547808329  | -0.208291275945 | 1.933774547759  |
| O  | 3.366300485667  | -1.929066498007 | -1.391010574555 |
| O  | 7.590200181796  | -1.121468596223 | 0.401341378749  |
| O  | 4.692399771208  | -1.048103769646 | -2.835565594591 |
| O  | 6.087022492042  | -0.208291611079 | 1.933774808799  |
| O  | 6.136772879365  | -1.929060730603 | -1.391013103023 |
| Ge | 6.237294288665  | -0.293942432360 | -0.485057206024 |
| Ge | 4.671731480802  | -1.036289595440 | 2.818093442894  |
| Ge | 7.442210686766  | -1.036279401086 | 2.818105668470  |
| Ge | 0.696354528946  | -0.293939031661 | -0.485055115975 |
| Ge | 3.466822828897  | -0.293939821335 | -0.485053412165 |
| Ge | 1.901266934514  | -1.036287445098 | 2.818105413915  |
| TV | 8.311403901755  | -0.000000000000 | 0.000000000000  |
| TV | 1.518455086262  | 2.461811442337  | -0.000000000001 |
| TV | -1.438936014318 | -0.814651688925 | 6.562217399157  |

# EQ'-GeO<sub>2</sub> 38

|    |                 |                |                 |
|----|-----------------|----------------|-----------------|
| O  | -0.365601999278 | 1.250577424875 | -0.860379335363 |
| O  | 1.338380336350  | 0.586997169060 | -4.213916353843 |
| O  | -1.695507270519 | 2.143756973834 | 0.575199185978  |
| O  | -1.754840678199 | 2.101576030626 | 7.099587601998  |
| O  | -0.017335733261 | 1.459475341065 | 3.779387070234  |
| O  | 1.160581627247  | 0.480199252385 | 2.289875528988  |
| O  | 2.501031310533  | 1.301738513706 | -0.945836773516 |
| O  | 3.963313260975  | 0.490012413676 | -4.108856732512 |
| O  | 1.178018632415  | 2.194219275734 | 0.571168172361  |
| O  | 1.167852057327  | 2.190883515040 | 7.043335736492  |
| O  | 2.608705078851  | 1.365154187885 | 3.850803703556  |
| O  | 4.023695277034  | 0.524585528603 | 2.392814657559  |
| Ge | 3.945127097737  | 2.188280302761 | -4.883954900596 |
| Ge | -0.227768723328 | 1.336516673656 | 1.372020369398  |
| Ge | 1.109206558536  | 0.447956274079 | -1.693090057489 |
| Ge | 2.559999082355  | 1.334645549048 | 1.542899514877  |
| Ge | 1.161403912445  | 2.186930865884 | -5.172070541118 |
| Ge | 3.872478394038  | 0.438152395425 | -1.878929484596 |
| TV | 5.563628309934  | 0.000000000000 | 0.000000000000  |
| TV | -1.525200714228 | 2.478320019010 | 0.000000000000  |
| TV | -2.684470053886 | 0.056432719291 | 9.720060106688  |

# EQ'-GeO<sub>2</sub> 39

|   |                 |                 |                 |
|---|-----------------|-----------------|-----------------|
| O | 0.426611091911  | 1.432158436234  | -0.518324304814 |
| O | 0.395277194305  | 0.542361529170  | -2.604868311575 |
| O | -1.163233136768 | 2.855489436062  | 0.394113216868  |
| O | -0.972438956924 | 2.246370034920  | 4.951203333322  |
| O | -0.998144117705 | 1.345570346776  | 2.866233871472  |
| O | 0.593466382004  | -0.092284761802 | 1.949828416953  |
| O | 0.429408458624  | 4.382405669130  | -0.518249370611 |
| O | 0.398082264172  | 3.492646632109  | -2.604796875152 |
| O | -1.160402095852 | 5.805795240974  | 0.394104913003  |
| O | -0.969661843470 | 5.196623810087  | 4.951303203549  |
| O | -0.995337502667 | 4.295810513833  | 2.866295406045  |

|    |                 |                 |                 |
|----|-----------------|-----------------|-----------------|
| O  | 0.596280697558  | 2.858020947095  | 1.949808438041  |
| Ge | 0.399797463759  | 4.970730081096  | -3.567843345801 |
| Ge | -0.285592309452 | 1.379784348530  | 1.175359130666  |
| Ge | 1.972569062603  | 0.589900846722  | -1.265829328151 |
| Ge | -0.282869428538 | 4.330027464003  | 1.175373374778  |
| Ge | 0.397013830802  | 2.020493693341  | -3.567832625728 |
| Ge | 1.975328848936  | 3.540123966505  | -1.265821780390 |
| TV | 3.137341786079  | -0.000000000000 | -0.000000000000 |
| TV | 0.005611991131  | 5.900500772107  | 0.000000000000  |
| TV | -2.935595289345 | 0.176681017250  | 7.182181760249  |

# EQ'-GeO<sub>2</sub> 40

|    |                 |                 |                 |
|----|-----------------|-----------------|-----------------|
| O  | 2.757941662835  | 1.921671820784  | -0.207735379981 |
| O  | 3.836042541206  | -0.879359552142 | -2.227987664590 |
| O  | 2.504337120918  | 6.446020945830  | -0.914061218874 |
| O  | 5.199641471546  | 5.600767393162  | 1.711029569482  |
| O  | -4.712915255216 | -0.751695182705 | 0.292090880725  |
| O  | -9.077008512402 | -4.217586279809 | 1.874009033419  |
| O  | 7.861365651418  | 1.568401073681  | 0.103306500368  |
| O  | 9.443713374630  | 0.137715923053  | -1.019177777669 |
| O  | 7.151094152398  | 5.391572612822  | 0.130627298373  |
| O  | 9.334166660066  | 5.942809424273  | 1.403994369904  |
| O  | -0.989187188760 | -2.000761301716 | 1.386396312522  |
| O  | -3.428655350282 | -3.871950544039 | 3.083993117168  |
| Ge | 6.379076672119  | 1.976820029069  | -1.151292633919 |
| Ge | -6.213230202768 | -1.515606435418 | 1.229991462016  |
| Ge | 3.119942893785  | 4.908100346980  | 0.271559156494  |
| Ge | -2.024142419262 | -2.710770374526 | 2.663849312812  |
| Ge | 2.526867402375  | 2.818571686265  | -1.922488447392 |
| Ge | 9.459658257409  | 3.796007365778  | -0.035007944587 |
| TV | 9.239660705364  | -0.000000000000 | -0.000000000000 |
| TV | 1.801910330599  | 4.126699392525  | 0.000000000000  |
| TV | -2.210124071884 | 5.024073939300  | 3.451943141794  |

# EQ'-GeO<sub>2</sub> 41

|    |                 |                 |                 |
|----|-----------------|-----------------|-----------------|
| O  | -1.347705920848 | 1.081824466320  | -0.037316096224 |
| O  | 1.376551671969  | -0.212817017740 | -0.974597757107 |
| O  | -2.788406126469 | 2.720055486189  | -0.221627610437 |
| O  | 3.210449327701  | 10.270692392172 | 2.069081326558  |
| O  | -2.294621804180 | -0.785407108661 | 1.591690628033  |
| O  | 0.794550209982  | 0.889671754564  | 0.908472179571  |
| O  | -3.354934709469 | 5.000963673201  | -0.037314158723 |
| O  | -0.630680866788 | 3.706314241307  | -0.974591854713 |
| O  | -4.795636381629 | 6.639196026054  | -0.221624022129 |
| O  | 1.203220265533  | 14.189835186134 | 2.069084198824  |
| O  | -4.301828616624 | 3.133734609496  | 1.591691082131  |
| O  | -1.212668928168 | 4.808805228492  | 0.908463876259  |
| Ge | -2.548953851205 | 3.977807164622  | -1.462572981898 |
| Ge | -0.648289230280 | -0.137097308281 | 1.222032259435  |
| Ge | 1.963895172084  | -1.596280129116 | 0.019083953652  |
| Ge | -2.655503349917 | 3.782043052758  | 1.222026905678  |
| Ge | -0.541710736470 | 0.058669564734  | -1.462571111292 |
| Ge | -0.043328217547 | 2.322851621739  | 0.019086493628  |
| TV | 4.531461812749  | 0.000000000000  | -0.000000000000 |
| TV | -4.014463590606 | 7.838274547845  | 0.000000000000  |
| TV | 0.301121231012  | 4.789738617851  | 3.835597243017  |



# EQ'-GeO<sub>2</sub> 42

|    |                 |                 |                 |
|----|-----------------|-----------------|-----------------|
| O  | 1.444427780280  | 1.141262679738  | 3.253575034797  |
| O  | -0.203073447117 | -0.763480024895 | 1.898798250222  |
| O  | 3.071482831832  | 1.934705763421  | 1.810273939094  |
| O  | -1.851738781117 | 0.456061472616  | 0.540401299710  |
| O  | 4.701015404715  | 3.839160052773  | 3.166219361795  |
| O  | 1.431603446747  | -1.871414405454 | 0.840877811346  |
| O  | 4.711851956295  | 1.141265317617  | 3.253558137672  |
| O  | 3.064278739627  | -0.763155113615 | 1.899016028444  |
| O  | 6.338873951964  | 1.934725902931  | 1.810314328459  |
| O  | 1.415515537899  | 0.456114090289  | 0.540313211542  |
| O  | 7.968433496264  | 3.839024944077  | 3.166119848185  |
| O  | 4.698667882858  | -1.871343168673 | 0.840836127350  |
| Ge | 9.602805604031  | 3.321790307025  | 2.893546718575  |
| Ge | 1.431358784031  | -0.246036715813 | 2.169213747648  |
| Ge | 3.092317846513  | 0.939194874367  | 4.370234986346  |
| Ge | 4.698847668693  | -0.246095729074 | 2.169282272304  |
| Ge | 6.335362471877  | 3.321896075966  | 2.893511602342  |
| Ge | 6.359665529122  | 0.939259832090  | 4.370291630679  |
| TV | 6.534736750775  | -0.000000000002 | -0.000000000000 |
| TV | 3.271082197389  | 5.689166099880  | -0.000000000000 |
| TV | -1.629514670541 | -1.197395866071 | 3.682047864925  |

# EQ'-GeO<sub>2</sub> 43

|    |                 |                 |                 |
|----|-----------------|-----------------|-----------------|
| O  | 1.917583201334  | 2.709887193985  | -0.838116775098 |
| O  | 2.071311546815  | 0.246859307967  | -0.620920762828 |
| O  | 0.370264265287  | 2.948032684046  | 0.665423726982  |
| O  | 9.483608977066  | 7.805496820555  | 1.011002996069  |
| O  | -8.149080569386 | -2.509020027808 | -0.711514801771 |
| O  | -4.188752624689 | -1.930696388928 | 1.232559081436  |
| O  | 3.839311508944  | 6.318031314838  | -0.838034012409 |
| O  | 3.993027311098  | 3.854944601510  | -0.620940702379 |
| O  | 2.291929823349  | 6.556184934907  | 0.665434231852  |
| O  | 11.405351629711 | 11.413551115055 | 1.010910903558  |
| O  | -6.227327998966 | 1.099144303583  | -0.711498360249 |
| O  | -2.267021767386 | 1.677439450574  | 1.232525600990  |
| Ge | 2.622386935097  | 5.071095029551  | -0.593240519141 |
| Ge | -5.929726838597 | -1.627258308289 | 1.968569161439  |
| Ge | 3.876619339469  | 3.174985265277  | 1.222761105206  |
| Ge | -4.007940936420 | 1.980879237775  | 1.968618111181  |
| Ge | 0.700672817891  | 1.462947966873  | -0.593226667845 |
| Ge | 5.798331792569  | 6.783083608070  | 1.222783629290  |
| TV | 5.184620426055  | -0.000000000003 | 0.000000000001  |
| TV | 3.843499604447  | 7.216213937444  | -0.000000000000 |
| TV | -0.391031541904 | 3.084210625641  | 3.608123320186  |

# EQ'-GeO<sub>2</sub> 44

|   |                 |                 |                 |
|---|-----------------|-----------------|-----------------|
| O | -1.241994085091 | -0.912976312273 | -0.124809884002 |
| O | 1.770758076174  | 0.594928685799  | -1.569446717511 |
| O | -3.533737789177 | 0.169644303954  | 0.135967960273  |
| O | 7.606413856263  | 11.533418735947 | 4.480179079722  |
| O | -0.729797183532 | 0.515110002598  | 2.117986637935  |
| O | -0.028711346343 | 1.265589120650  | 0.082755071959  |
| O | -4.144288216007 | 2.502566703728  | -0.124878949963 |
| O | -1.131992294639 | 4.011025640644  | -1.570062177469 |
| O | -6.436067465536 | 3.585326333717  | 0.135109425951  |
| O | 4.704157153306  | 14.949106700845 | 4.480184101136  |

|    |                 |                 |                 |
|----|-----------------|-----------------|-----------------|
| O  | -3.632132833143 | 3.930638815235  | 2.117980939452  |
| O  | -2.931029595587 | 4.681246265786  | 0.082745756115  |
| Ge | -5.598744455670 | 2.393751610544  | -1.744259704212 |
| Ge | -1.785740595676 | 0.662256031911  | 0.515624348696  |
| Ge | 0.513746309489  | -0.311576358884 | -0.556602197227 |
| Ge | -4.688039346165 | 4.077817271019  | 0.515586801511  |
| Ge | -2.696416346834 | -1.021957784690 | -1.744334936968 |
| Ge | -2.388540838111 | 3.104080628433  | -0.556629608956 |
| TV | 5.802911111471  | -0.000000000005 | 0.000000000008  |
| TV | -5.804589040865 | 6.831192937051  | -0.000000000000 |
| TV | 1.169299777214  | 5.851246743996  | 3.312386898419  |

# EQ'-GeO<sub>2</sub> 45

|    |                 |                 |                 |
|----|-----------------|-----------------|-----------------|
| O  | 0.431325182307  | -0.785707891249 | 0.882752578901  |
| O  | 1.245809641647  | -1.784283303725 | -0.734639647784 |
| O  | 3.379343705682  | 2.367000501308  | 0.890296450865  |
| O  | -0.963077005616 | -2.030431916057 | -0.721688430740 |
| O  | 1.194931240082  | 1.318210228189  | 0.728630690335  |
| O  | 1.567207600106  | 1.067046444215  | -0.987098835116 |
| O  | 4.453564729222  | 4.893689822024  | 0.984849907584  |
| O  | -0.649544832853 | 0.655439865486  | -0.838195623123 |
| O  | 2.236453544880  | 4.488602799225  | 1.133972066821  |
| O  | 2.609078454918  | 4.232130778350  | -0.580448033153 |
| O  | 4.763962071604  | 7.587201447265  | 0.866349608101  |
| O  | 0.424725527272  | 3.186265564476  | -0.742392068093 |
| Ge | -0.236173187230 | 4.859668431234  | -0.953713020760 |
| Ge | 4.039939719260  | 0.693166058196  | 1.100994488233  |
| Ge | 5.265632073064  | 3.164946245736  | 1.102467577508  |
| Ge | -2.083027095617 | -0.527264631602 | -1.145127726139 |
| Ge | -1.457468600698 | 2.387037344936  | -0.955058577769 |
| Ge | 3.759829804381  | -2.039553619357 | 1.292820742271  |
| TV | 4.550115575151  | 0.000000000000  | 0.000000000000  |
| TV | 2.123186413211  | 8.119869114951  | -0.000000000003 |
| TV | -0.935801074612 | 0.080890666806  | 3.600154727750  |

# EQ'-GeO<sub>2</sub> 46

|    |                 |                 |                 |
|----|-----------------|-----------------|-----------------|
| O  | -0.616863020296 | 1.572890151180  | -0.331587671288 |
| O  | 4.819049212942  | 0.228265212866  | -2.418163515094 |
| O  | -3.172937362203 | 1.834585725638  | -0.524769615771 |
| O  | 4.393354519118  | 6.279533665163  | 3.160692949592  |
| O  | -2.842195492080 | 0.129669832861  | 1.073284401417  |
| O  | -0.287608968331 | -0.134212292430 | 1.265677408384  |
| O  | -1.933971768262 | 4.137734003021  | -0.695863714670 |
| O  | 3.485853190496  | 2.281278490844  | -2.418459975043 |
| O  | -4.544127356927 | 3.944633827290  | -0.525696039892 |
| O  | 2.604309151650  | 9.035038352704  | 3.158926612858  |
| O  | -4.649460982270 | 2.373015666284  | 1.437295262889  |
| O  | -2.040605067042 | 2.563720959039  | 1.265863851028  |
| Ge | -3.252806693593 | 3.282010875659  | -1.623940935958 |
| Ge | -1.562717697527 | 0.955648415286  | 2.027134170434  |
| Ge | 0.902333215267  | 0.851170387851  | 0.371975698821  |
| Ge | -3.329521686254 | 3.225833440901  | 2.366642790601  |
| Ge | -1.895675650409 | 0.746528651230  | -1.286443912419 |
| Ge | -0.660001220790 | 3.254821937568  | 0.370528180442  |
| TV | 5.264479927452  | -0.000000000001 | 0.000000000000  |
| TV | -3.122122770554 | 4.807129232447  | 0.000000000004  |
| TV | -0.242969948274 | 3.256007026493  | 5.334899581695  |

# EQ'-GeO<sub>2</sub> 47

|    |                 |                 |                 |
|----|-----------------|-----------------|-----------------|
| O  | 0.406511275870  | -0.426745781419 | 0.383475397069  |
| O  | 1.242855244806  | 0.183777982679  | -2.072188852695 |
| O  | -0.398515169741 | -1.237295582663 | 3.077168460573  |
| O  | 0.391856741426  | -2.436667927970 | -1.082153795733 |
| O  | -0.828911188130 | 2.932743798913  | 0.430894350773  |
| O  | 0.009182218828  | 3.495284021498  | -2.062111643150 |
| O  | -1.650413106567 | 2.123019068744  | 3.021933743888  |
| O  | -0.852200072538 | 0.936413213122  | -1.076266348856 |
| O  | -2.069572221564 | 6.302654091994  | 0.396215529168  |
| O  | -1.243335656732 | 6.910858939087  | -2.065321811926 |
| O  | -2.884730560239 | 5.492115773683  | 3.026734145752  |
| O  | -2.085961969017 | 4.248029475901  | -1.071473944666 |
| Ge | -0.549741303162 | 6.817999252770  | -0.446021962050 |
| Ge | -0.222458283577 | 1.291937707144  | 0.603442743288  |
| Ge | -1.459877050995 | 4.666303614541  | 0.588060398270  |
| Ge | 1.924012215576  | 0.097139574308  | -0.448244982792 |
| Ge | 0.678533152874  | 3.443649349447  | -0.431579892797 |
| Ge | 1.030183331909  | -2.055531926825 | 0.587554416652  |
| TV | 4.254007505207  | -0.000000000000 | -0.000000000000 |
| TV | -3.720518370932 | 10.084776572288 | -0.000000000003 |
| TV | -1.701103634508 | -3.053345758740 | 3.294658120851  |

# EQ'-GeO<sub>2</sub> 48

|    |                 |                 |                 |
|----|-----------------|-----------------|-----------------|
| O  | -1.110458654126 | 0.901271792531  | 0.310976667528  |
| O  | 2.982821990570  | 0.521462790249  | -1.400822192283 |
| O  | -4.864831504235 | 2.036772760858  | -1.386813568680 |
| O  | 4.140807620195  | 6.764651494541  | 3.248196855934  |
| O  | -3.060400267548 | -0.413092645842 | 0.810740206485  |
| O  | 0.900315031678  | 0.456216202403  | 1.793192241469  |
| O  | -3.114262946134 | 3.825019337469  | 0.310975157864  |
| O  | 0.979011106614  | 3.445211204808  | -1.400818989935 |
| O  | -6.868638446363 | 4.960525390096  | -1.386827735070 |
| O  | 2.137011155957  | 9.688399696687  | 3.248203359599  |
| O  | -5.064209228148 | 2.510660299294  | 0.810748028480  |
| O  | -1.103486902923 | 3.379964880432  | 1.793202193612  |
| Ge | -2.943450664992 | 4.205613669595  | -1.391184945988 |
| Ge | -0.218027811583 | -0.627323683840 | 0.924603269241  |
| Ge | 1.894197433513  | 1.129962659487  | 0.205351226890  |
| Ge | -2.221828460075 | 2.296429055798  | 0.924606514217  |
| Ge | -0.939643516550 | 1.281863873981  | -1.391182928145 |
| Ge | -0.109609324453 | 4.053713796046  | 0.205351950059  |
| TV | 5.827102391055  | 0.000000000001  | 0.000000000001  |
| TV | -4.007612654297 | 5.847500672720  | 0.000000000000  |
| TV | -0.455636530654 | 3.791395048112  | 3.910562256960  |

# EQ'-GeO<sub>2</sub> 49

|   |                 |                 |                 |
|---|-----------------|-----------------|-----------------|
| O | 3.030487267756  | 1.421968860931  | -0.319580815508 |
| O | 3.497210154405  | -0.367502528489 | -2.005149539271 |
| O | 0.929845751130  | 2.199967534651  | -0.006882777175 |
| O | 0.166619821183  | 4.511484831689  | 2.780142675559  |
| O | -4.062289897069 | 0.348990866380  | 1.370698438080  |
| O | -0.122057869115 | -1.892723776123 | 1.976071959137  |
| O | 1.481664194802  | 4.311770415735  | -0.319614130772 |
| O | 1.948377798680  | 2.522264556435  | -2.005156419694 |
| O | -0.618964615789 | 5.089718574428  | -0.006881095135 |

|    |                 |                 |                 |
|----|-----------------|-----------------|-----------------|
| O  | -1.382242697471 | 7.401255640560  | 2.780185993760  |
| O  | -5.611127346583 | 3.238764718473  | 1.370680280329  |
| O  | -1.670920799243 | 0.997085617257  | 1.976101891059  |
| Ge | -1.153939195034 | 6.361708924493  | -1.622826463000 |
| Ge | -6.814471578148 | -0.627005686154 | 1.611225398714  |
| Ge | 2.897332141771  | 3.254238068496  | -0.447156263202 |
| Ge | -8.363318840510 | 2.262791199725  | 1.611230774694  |
| Ge | 0.394888831315  | 3.471919097984  | -1.622841445936 |
| Ge | 1.348512926127  | 6.144040605701  | -0.447152515309 |
| TV | 4.341036099023  | 0.000000000000  | -0.000000000001 |
| TV | -3.097663773348 | 5.779576873170  | -0.000000000000 |
| TV | -3.883855442613 | 2.663137097232  | 5.304645354149  |

# EQ'-GeO<sub>2</sub> 50

|    |                 |                 |                 |
|----|-----------------|-----------------|-----------------|
| O  | 1.361930221224  | -2.094471876048 | -0.020166235881 |
| O  | -0.380375022373 | -1.994803609802 | -1.582872657472 |
| O  | 1.145922490614  | -0.505942019981 | 1.536863811088  |
| O  | -0.573173245638 | -0.393292036245 | -0.025505933428 |
| O  | 0.940691667522  | 1.252732513536  | -0.020093744228 |
| O  | -0.801627610267 | 1.352424886583  | -1.582720873717 |
| O  | 0.724661924872  | 2.841244935211  | 1.536838188518  |
| O  | -0.994415076485 | 2.953979457748  | -0.025497960795 |
| O  | 0.519493383610  | 4.600023734038  | -0.020127409922 |
| O  | -1.222991411042 | 4.699559621377  | -1.582844972375 |
| O  | 0.303406625561  | 6.188490562096  | 1.536822661338  |
| O  | -1.415663988102 | 6.301202833679  | -0.025552244196 |
| Ge | 0.248446930366  | 6.301463909603  | -0.951796063368 |
| Ge | -1.148789718781 | 4.601654001999  | 0.898856562279  |
| Ge | -1.570104607912 | 7.948871984827  | 0.898854920601  |
| Ge | 1.090958967315  | -0.393000919099 | -0.951792175617 |
| Ge | 0.669698353932  | 2.954228617715  | -0.951781323013 |
| Ge | -0.727569292424 | 1.254388951503  | 0.898876542925  |
| TV | 3.409846792790  | -0.000000000000 | 0.000000000000  |
| TV | -1.263775966141 | 10.041713382368 | -0.000000000000 |
| TV | -2.339075624259 | -1.034471233909 | 3.800693098822  |

# EQ'-GeO<sub>2</sub> 51

|    |                 |                 |                 |
|----|-----------------|-----------------|-----------------|
| O  | -2.482492228773 | 2.494044617529  | -0.299015848213 |
| O  | 3.015704312666  | 0.248745789049  | -1.724779798763 |
| O  | -4.343028763918 | 1.409479687477  | -0.590214084329 |
| O  | 5.071975079903  | 6.465104881521  | 2.767875508758  |
| O  | -2.379928704371 | 0.526816876688  | 0.757643115989  |
| O  | 0.884396724759  | 0.377108227929  | 1.510632980242  |
| O  | -3.800829336025 | 4.648959566775  | -0.306615195200 |
| O  | 1.928369333386  | 3.102780363610  | -2.197499942683 |
| O  | -5.603992985130 | 3.489383707336  | -0.588924884776 |
| O  | 3.226424392304  | 9.563640276253  | 2.770370016556  |
| O  | -4.366558015243 | 2.832700624731  | 1.310058202681  |
| O  | -0.963028716265 | 3.484844504025  | 1.517148073283  |
| Ge | -2.446376428564 | 3.996984647022  | -1.321584784840 |
| Ge | -0.885152187038 | -0.408800262067 | 1.497342664383  |
| Ge | 2.013699339490  | -0.350206294964 | 0.198506946289  |
| Ge | -2.489487687495 | 2.290068624474  | 1.504809196491  |
| Ge | -1.340583114186 | 1.144150778445  | -1.089983059179 |
| Ge | 0.076060772592  | 1.991487363694  | 0.512728204616  |
| TV | 5.803594942712  | -0.000000000000 | 0.000000000000  |
| TV | -3.090058673358 | 5.164172479567  | -0.000000000000 |

|                           |                 |                 |                 |
|---------------------------|-----------------|-----------------|-----------------|
| TV                        | -0.164603148346 | 3.448439612959  | 4.420787123538  |
| # EQ'-GeO <sub>2</sub> 52 |                 |                 |                 |
| O                         | -2.157133407703 | 1.238488381819  | -0.801204250548 |
| O                         | -0.866210603802 | -1.341346919061 | 2.356046545523  |
| O                         | -0.851781301201 | 0.396315297566  | -2.250393195844 |
| O                         | -0.682774992622 | 1.656127663914  | 0.900407951481  |
| O                         | -2.405805450483 | 0.106658910065  | 1.277631865211  |
| O                         | 0.626951356521  | -1.212554313360 | -1.492150055377 |
| O                         | 1.071035104323  | 1.238474015491  | -0.801206091263 |
| O                         | 2.361954678973  | -1.341403757493 | 2.356032850907  |
| O                         | 2.376370837076  | 0.396351125476  | -2.250389268113 |
| O                         | 2.545346208217  | 1.656126568764  | 0.900378003932  |
| O                         | 0.822366495280  | 0.106623135233  | 1.277620331883  |
| O                         | 3.855136494433  | -1.212507218944 | -1.492135638945 |
| Ge                        | 1.956710703118  | -1.398114762775 | 0.573506165499  |
| Ge                        | -1.033131888554 | -1.562557052658 | -2.436683990797 |
| Ge                        | -0.441212483895 | 0.364146133745  | -0.399496550383 |
| Ge                        | 2.195028021048  | -1.562508795602 | -2.436698293192 |
| Ge                        | -1.271457202268 | -1.398104113725 | 0.573540497503  |
| Ge                        | 2.786969608260  | 0.364155636849  | -0.399477669234 |
| TV                        | 6.456326759737  | 0.000000000000  | -0.000000000000 |
| TV                        | -1.105801093915 | 3.915948090503  | -0.000000000000 |
| TV                        | -1.217016127746 | -1.953253899135 | 5.215732220849  |

|                           |                 |                 |                 |
|---------------------------|-----------------|-----------------|-----------------|
| # EQ'-GeO <sub>2</sub> 53 |                 |                 |                 |
| O                         | 3.038211495283  | 2.224608561481  | -0.848628072259 |
| O                         | 1.588572833804  | 0.039925389671  | -0.789471963194 |
| O                         | 0.767739524826  | 0.977939299319  | -0.086013228780 |
| O                         | 1.549400588984  | 5.982693486674  | 2.271281867994  |
| O                         | -3.364857635154 | -0.987685457437 | 1.098001406625  |
| O                         | -0.724219345321 | -3.166806501008 | 1.014121498145  |
| O                         | 2.471300900194  | 5.914387704327  | -0.848705038028 |
| O                         | 1.021761687928  | 3.729695905709  | -0.789496174816 |
| O                         | 0.200871537977  | 4.667695338489  | -0.086074701799 |
| O                         | 0.982470162004  | 9.672523768757  | 2.271241996848  |
| O                         | -3.931739338688 | 2.702079144895  | 1.097990712029  |
| O                         | -1.291073284700 | 0.522946153006  | 1.014139353156  |
| Ge                        | -0.844353734079 | 7.085099074181  | -2.084306132473 |
| Ge                        | -4.327523108624 | 1.420189304925  | 2.318149705799  |
| Ge                        | 1.880482038236  | 2.380221105979  | 0.443470247944  |
| Ge                        | -4.894368205650 | 5.109973469348  | 2.318240363693  |
| Ge                        | -0.277523444130 | 3.395314844240  | -2.084327219892 |
| Ge                        | 1.313690435585  | 6.069890359474  | 0.443481325304  |
| TV                        | 4.050561788344  | -0.000000000000 | -0.000000000001 |
| TV                        | -1.133700451337 | 7.379543863904  | 0.000000000000  |
| TV                        | -3.455678963392 | 4.108803732598  | 4.475873482247  |

|                           |                 |                 |                 |
|---------------------------|-----------------|-----------------|-----------------|
| # EQ'-GeO <sub>2</sub> 54 |                 |                 |                 |
| O                         | -1.748424474655 | -3.174834945184 | -2.623330803293 |
| O                         | -0.320778736914 | 0.086146617898  | 0.307748420485  |
| O                         | 0.465704358776  | -2.354262947534 | -1.886664942927 |
| O                         | -1.263536286975 | -2.052246029598 | 1.163458127546  |
| O                         | -2.440951039730 | -0.831686542485 | -0.291445362203 |
| O                         | -0.468515513055 | -1.569113481596 | -1.177729275348 |
| O                         | -2.902564401366 | -0.157099111897 | -2.623328768236 |
| O                         | -1.474922708437 | 3.103870355968  | 0.307739706750  |

|    |                 |                 |                 |
|----|-----------------|-----------------|-----------------|
| O  | -0.688416602722 | 0.663481079497  | -1.886668086895 |
| O  | -2.417655833343 | 0.965473413450  | 1.163458716070  |
| O  | -3.595073381288 | 2.186053122813  | -0.291444719384 |
| O  | -1.622624310284 | 1.448606761657  | -1.177726715866 |
| Ge | -2.143205650242 | -0.648592924267 | 2.191436563050  |
| Ge | -2.095628354601 | -2.439789133040 | -0.957135532230 |
| Ge | -3.843504738371 | -1.391433484899 | 1.090839877551  |
| Ge | -3.249748566528 | 0.577943787816  | -0.957125413044 |
| Ge | -0.989063756269 | -3.666319805293 | 2.191431207451  |
| Ge | -4.997627070272 | 1.626293861389  | 1.090840278341  |
| TV | 4.217835370594  | -0.000000000000 | -0.000000000000 |
| TV | -2.308273987553 | 6.035459171785  | 0.000000000000  |
| TV | -1.858429718249 | 0.201782512138  | 5.291767191273  |

# EQ'-GeO<sub>2</sub> 55

|    |                 |                 |                 |
|----|-----------------|-----------------|-----------------|
| O  | -1.421741161928 | 2.292832482133  | -0.752827658169 |
| O  | 3.251388763049  | -0.637201086132 | -1.860275983809 |
| O  | -3.900155089123 | 1.450706959839  | -0.006448779221 |
| O  | 2.792351515084  | 6.834145301386  | 3.058835107175  |
| O  | -2.046030428439 | 1.025450907205  | 1.038812916982  |
| O  | 1.999671198521  | 0.343639674308  | 1.807451393123  |
| O  | -3.858207181108 | 4.777618817506  | -0.752819602810 |
| O  | 0.814893844502  | 1.847577827265  | -1.860259341086 |
| O  | -6.336644280094 | 3.935524333739  | -0.006449946998 |
| O  | 0.355889569905  | 9.318963341360  | 3.058816089546  |
| O  | -4.482545002657 | 3.510229548905  | 1.038800747842  |
| O  | -0.436804934952 | 2.828448400771  | 1.807498103019  |
| Ge | -6.578186989880 | 3.308764191239  | -1.617442439838 |
| Ge | -0.397355398569 | 0.369515850720  | 0.318772463043  |
| Ge | 3.472629750241  | -0.578049915076 | 1.127331053104  |
| Ge | -2.833852634390 | 2.854302962975  | 0.318804332043  |
| Ge | -4.141698912935 | 0.823972416681  | -1.617454753222 |
| Ge | 1.036133589543  | 1.906735521246  | 1.127353610479  |
| TV | 6.408923468120  | -0.000000000005 | 0.000000000001  |
| TV | -4.872973075969 | 4.969600403064  | -0.000000000006 |
| TV | 0.232277998370  | 3.351915422370  | 4.276563064943  |

# EQ'-GeO<sub>2</sub> 56

|    |                 |                |                 |
|----|-----------------|----------------|-----------------|
| O  | 0.542232318249  | 1.571770841274 | 0.275945941162  |
| O  | -0.687476038015 | 0.823069786473 | -1.496592946226 |
| O  | -1.824168983331 | 1.998127967747 | -0.037029943119 |
| O  | -0.239426891111 | 3.237552681934 | 1.754224055500  |
| O  | -1.438731474080 | 0.215932966104 | 2.774056903931  |
| O  | 0.799171225420  | 0.222171735734 | 1.985423160324  |
| O  | -1.799549230018 | 4.328047145231 | 0.385272415710  |
| O  | -1.642529446152 | 3.434441609761 | -1.955009484984 |
| O  | -3.927215433455 | 3.965052881936 | -0.110937957409 |
| O  | -3.122591914955 | 6.297276285102 | 2.528113727168  |
| O  | -2.598869631125 | 3.310151195559 | 3.190864860854  |
| O  | -1.043753329849 | 2.172885627831 | 2.070468225714  |
| Ge | -0.881120452599 | 4.781735357467 | -2.912747527396 |
| Ge | -0.804235626648 | 0.592109680770 | 0.995658772602  |
| Ge | 1.420591494765  | 0.364264739959 | -0.992101349532 |
| Ge | -2.778202776792 | 2.930527141462 | 1.227771756333  |
| Ge | 1.375436560557  | 2.332496188323 | -2.425082764556 |
| Ge | -0.356767100444 | 2.613255884455 | -0.976913482898 |
| TV | 4.451755065292  | 0.000000000000 | 0.000000000000  |

|    |                 |                 |                 |
|----|-----------------|-----------------|-----------------|
| TV | -4.208776205826 | 4.808762438435  | -0.000000000000 |
| TV | -3.355738283365 | -0.728203471452 | 6.276703469840  |

# EQ'-GeO<sub>2</sub> 57

|    |                 |                 |                 |
|----|-----------------|-----------------|-----------------|
| O  | -0.961992529693 | 1.050663188643  | 0.794141059044  |
| O  | 3.123431109044  | 0.833385224050  | -0.060162903392 |
| O  | -4.092824769159 | 2.995233965186  | -0.375042757817 |
| O  | 4.913021962149  | 8.163255816226  | 1.104592364606  |
| O  | -2.387595062235 | -2.039845397482 | 1.419997146782  |
| O  | 1.018522520724  | -0.082463355835 | 0.248691086499  |
| O  | 0.097027637334  | 4.684981230160  | 3.370897362041  |
| O  | 4.181974607432  | 4.467687869423  | 2.516117118667  |
| O  | -3.033944314754 | 6.629623322532  | 2.201543153775  |
| O  | 5.971638728858  | 11.797339598800 | 3.680846830717  |
| O  | -1.328712433621 | 1.594400411167  | 3.996516602487  |
| O  | 2.077147231441  | 3.551469290722  | 2.825541323500  |
| Ge | -0.723841378948 | 4.299055295137  | 1.811121148980  |
| Ge | -0.825700481096 | -0.925384452991 | 1.301985393046  |
| Ge | 0.888165325054  | 1.883283589881  | -0.252440702578 |
| Ge | 0.233115529905  | 2.708735361986  | 3.878633408247  |
| Ge | -1.782568585757 | 0.664678279165  | -0.765608253449 |
| Ge | 1.946768947861  | 5.517748472064  | 2.324168590304  |
| TV | 6.554246623339  | -0.000000000001 | 0.000000000000  |
| TV | -2.566334467531 | 4.012465272849  | 0.000000000003  |
| TV | 2.117407909627  | 7.268430428251  | 5.153295436162  |

# EQ'-GeO<sub>2</sub> 58

|    |                 |                 |                 |
|----|-----------------|-----------------|-----------------|
| O  | 3.273257657544  | 1.643482468934  | 3.231128330274  |
| O  | -2.832307997976 | -2.712391975423 | -4.996367606625 |
| O  | 1.614376126516  | -1.149036769389 | 5.099368310033  |
| O  | 0.118380607185  | -1.262169938006 | -3.093512725689 |
| O  | 3.462834358678  | 4.579125336865  | 3.207619715847  |
| O  | -2.689696345966 | 0.268724851601  | -4.984675476625 |
| O  | 1.894365488003  | 1.723469447516  | 5.146659376922  |
| O  | 0.310791059059  | 1.631385849005  | -3.073847343026 |
| O  | 3.653753270341  | 7.463889513607  | 3.207440287146  |
| O  | -2.431882737771 | 3.094766206545  | -4.953544408794 |
| O  | 2.003200445369  | 4.668026410375  | 5.109107496107  |
| O  | 0.530945955531  | 4.537778763616  | -3.056948940928 |
| Ge | 0.665629948750  | 4.677683194971  | -1.236173065527 |
| Ge | 3.410754753718  | 1.766076331638  | 1.409460393371  |
| Ge | 3.627391597763  | 4.676061785550  | 1.381768773058  |
| Ge | 0.221396913089  | -1.149248428541 | -1.265166067212 |
| Ge | 0.485486718278  | 1.766506346004  | -1.251858426691 |
| Ge | 3.163548706699  | -1.145045247915 | 1.381146357876  |
| TV | 2.946662300210  | -0.000000000000 | 0.000000000000  |
| TV | 0.601201623215  | 8.716742839996  | -0.000000000000 |
| TV | 1.373247032060  | -1.429305260506 | 5.050234209365  |

# EQ'-GeO<sub>2</sub> 59

|   |                 |                 |                 |
|---|-----------------|-----------------|-----------------|
| O | 2.598882457412  | 1.509103925950  | -1.542346602314 |
| O | 4.740311628946  | 1.358788851753  | -0.610309495146 |
| O | -0.707936078323 | 1.453419787270  | 0.834704327402  |
| O | 3.547290938641  | 5.426112015517  | 2.132835573373  |
| O | -4.572679093557 | 0.169953155763  | -0.053297207651 |
| O | -3.900816440816 | -1.105131915848 | 1.787056063114  |
| O | 2.561028387506  | 4.134496690368  | -1.542346540473 |

|    |                 |                 |                 |
|----|-----------------|-----------------|-----------------|
| O  | 4.702485405802  | 3.984135457314  | -0.610457692241 |
| O  | -0.745807674872 | 4.078786986771  | 0.834622718591  |
| O  | 3.509393447926  | 8.051515787939  | 2.132841281880  |
| O  | -4.610545614727 | 2.795339667644  | -0.053294700353 |
| O  | -3.938697077654 | 1.520264494763  | 1.787010082867  |
| Ge | 0.682606312060  | 4.107881896005  | -1.277234340004 |
| Ge | -5.223819650215 | 0.191157230719  | 1.751963818767  |
| Ge | 3.028282909192  | 2.520958361050  | 0.313293792256  |
| Ge | -5.261689426093 | 2.816569330429  | 1.751990512071  |
| Ge | 0.720408288072  | 1.482483259863  | -1.277229247465 |
| Ge | 2.990463424663  | 5.146307877920  | 0.313293601599  |
| TV | 5.679821802692  | -0.000000000000 | -0.000000000001 |
| TV | -0.075731765973 | 5.250796450415  | 0.000000000000  |
| TV | -2.838886611541 | 2.631466432262  | 4.553195109263  |

# EQ'-GeO<sub>2</sub> 60

|    |                 |                 |                 |
|----|-----------------|-----------------|-----------------|
| O  | 2.297740842963  | 3.305913660835  | -0.668369095771 |
| O  | 2.389940138374  | 0.622586103929  | -0.941359059284 |
| O  | -1.415605880553 | 2.034400051917  | 0.368596996217  |
| O  | 9.578277561133  | 9.684703954139  | 1.511562639769  |
| O  | -4.403003942751 | -1.297223169786 | 1.675105336617  |
| O  | -7.482681483590 | -5.008218846534 | 0.155312559564  |
| O  | 3.492102919117  | 7.791186191289  | -0.668362467786 |
| O  | 3.584299327107  | 5.107863734330  | -0.941338487944 |
| O  | -0.221230129243 | 6.519693224686  | 0.368572521601  |
| O  | 10.772655003177 | 14.170015015310 | 1.511526785717  |
| O  | -3.208615124932 | 3.188065246096  | 1.675102644109  |
| O  | -6.288302387574 | -0.522909962289 | 0.155281819526  |
| Ge | 2.263116006100  | 6.354809230180  | -0.679269433483 |
| Ge | -6.042268194035 | -2.664301994823 | 1.404607067023  |
| Ge | 3.644295788741  | 3.887962305112  | 0.510405636321  |
| Ge | -4.847918850230 | 1.820945984171  | 1.404598554494  |
| Ge | 1.068763951363  | 1.869531759384  | -0.679275056823 |
| Ge | 4.838676974953  | 8.373246953236  | 0.510396986383  |
| TV | 5.261653679189  | 0.000000000000  | -0.000000000001 |
| TV | 2.388735700658  | 8.970546132381  | -0.000000000000 |
| TV | -1.936776339747 | 4.352203911889  | 2.864232767638  |

# EQ'-GeO<sub>2</sub> 61

|    |                 |                 |                 |
|----|-----------------|-----------------|-----------------|
| O  | -1.218017010707 | 1.408227418997  | -0.059601703177 |
| O  | 7.711638311519  | -0.497972394485 | -2.027967289677 |
| O  | -3.367443245309 | 1.794882997542  | 0.408471945055  |
| O  | 3.739134245284  | 6.860618772908  | 2.632650674934  |
| O  | -3.173302596225 | -0.325792316119 | 0.021755996434  |
| O  | -0.007423707614 | 0.766942830167  | 1.810246254923  |
| O  | -3.469760913983 | 4.053726465856  | -0.059444865275 |
| O  | 5.460080920112  | 2.147472372924  | -2.027995296595 |
| O  | -5.619230414533 | 4.440008387760  | 0.408559763335  |
| O  | 1.487483458368  | 9.505853035304  | 2.632634061150  |
| O  | -5.424891531365 | 2.319463515700  | 0.021696292491  |
| O  | -2.259043195158 | 3.412347663549  | 1.810177619626  |
| Ge | -4.874394298561 | 3.886550995766  | -1.191505366202 |
| Ge | -2.016495627864 | 0.465485634466  | 1.325978279220  |
| Ge | 1.250496958576  | 0.546374384868  | 0.416506898752  |
| Ge | -4.268215769053 | 3.110784575771  | 1.325939947990  |
| Ge | -2.622789260974 | 1.241106630224  | -1.191487786243 |
| Ge | -1.001197203597 | 3.191632792621  | 0.416480519608  |



|    |                 |                 |                |
|----|-----------------|-----------------|----------------|
| TV | 6.166861254449  | -0.000000000001 | 0.000000000000 |
| TV | -4.503255874433 | 5.290631111128  | 0.000000000004 |
| TV | -1.555934014769 | 3.422890108244  | 4.092293306871 |

# EQ'-GeO<sub>2</sub> 62

|    |                 |                 |                 |
|----|-----------------|-----------------|-----------------|
| O  | -2.560489445062 | -0.007798069631 | 1.521942160613  |
| O  | 1.830174923969  | 3.327318423537  | -0.900738168994 |
| O  | -4.545179944498 | -0.910070171052 | 1.274409895850  |
| O  | -1.963748493283 | -1.191621566665 | -0.449330440980 |
| O  | 0.256095659105  | -1.039079099906 | -0.336083883934 |
| O  | 1.753023851090  | 1.262180400596  | 0.095548531963  |
| O  | -4.346148982177 | -0.870136529806 | 3.467927812408  |
| O  | 0.044711574792  | 2.465125327177  | 1.045243594725  |
| O  | -6.330647298001 | -1.772367627446 | 3.220242054570  |
| O  | -3.749247416266 | -2.053766155741 | 1.496398582593  |
| O  | -1.529406955467 | -1.901409846898 | 1.609798897111  |
| O  | -0.032064748943 | 0.400012408087  | 2.041581626868  |
| Ge | -1.552155546567 | 1.359821196788  | 1.069905781014  |
| Ge | -3.255558478464 | 2.542608562910  | 0.045806914639  |
| Ge | -0.388464544553 | 4.180819974499  | 1.410111991395  |
| Ge | -5.040869317163 | 1.680728201655  | 1.991892757119  |
| Ge | 0.233189825846  | 2.221751331888  | -0.876189075918 |
| Ge | -2.173817322669 | 3.318601532317  | 3.356035043906  |
| TV | 6.498365630731  | -0.000000000000 | -0.000000000000 |
| TV | -0.486142183269 | 5.422396990063  | 0.000000000000  |
| TV | -3.570906666631 | -1.724391722927 | 3.891800594372  |

# EQ'-GeO<sub>2</sub> 63

|    |                 |                 |                 |
|----|-----------------|-----------------|-----------------|
| O  | 0.761471113275  | 2.457445555838  | 0.188339247192  |
| O  | 1.861001876058  | -0.144789178294 | -2.035243910119 |
| O  | -1.345780365562 | 2.055799763995  | 0.016696752090  |
| O  | 0.537428815191  | 2.514757395589  | 4.167213037476  |
| O  | -5.315999999372 | -1.220565992198 | 2.248345989293  |
| O  | 2.791682282928  | 2.374045024330  | 0.709490360570  |
| O  | -1.021813824666 | 4.678259195490  | 0.188297368958  |
| O  | 0.077810668363  | 2.076059187706  | -2.035255933388 |
| O  | -3.129164839586 | 4.277103272186  | 0.016964877809  |
| O  | -1.245957014584 | 4.735770773844  | 4.167262556513  |
| O  | -7.099603151829 | 1.000492070326  | 2.248235939729  |
| O  | 1.008300697488  | 4.595306845134  | 0.709749186906  |
| Ge | -3.145507187892 | 3.384583098274  | -2.859275057202 |
| Ge | -0.249082738785 | 1.741581564227  | 1.592915413402  |
| Ge | 1.306885882979  | 1.174804626136  | -0.914201074663 |
| Ge | -2.032376590474 | 3.962479923409  | 1.592819165660  |
| Ge | -1.362165910026 | 1.163425809653  | -2.859248547250 |
| Ge | -0.476755100651 | 3.395721277812  | -0.914608061704 |
| TV | 5.252987527564  | -0.000000000014 | 0.000000000016  |
| TV | -3.566831595453 | 4.442154491002  | 0.000000000078  |
| TV | -2.096614246161 | 0.427908734783  | 5.870616090892  |

# EQ'-GeO<sub>2</sub> 64

|   |                 |                 |                 |
|---|-----------------|-----------------|-----------------|
| O | 1.580394555008  | -0.718984087027 | 0.518504384385  |
| O | 0.117825327657  | -1.975489584828 | -2.270286926513 |
| O | 1.714603647228  | 0.771017849435  | 3.092553956020  |
| O | -0.483222612538 | -4.061952282615 | -1.765295382888 |
| O | 0.385045164302  | 2.594671106547  | 0.518585430094  |
| O | -1.077571227015 | 1.338149531783  | -2.270267107466 |

|    |                 |                 |                 |
|----|-----------------|-----------------|-----------------|
| O  | 0.519294064202  | 4.084628833616  | 3.092560451277  |
| O  | -1.678638456623 | -0.748238110911 | -1.765343952545 |
| O  | -0.810350329302 | 5.908333883298  | 0.518541764632  |
| O  | -2.272906657365 | 4.651789532088  | -2.270294722028 |
| O  | -0.676113423519 | 7.398299599232  | 3.092530382628  |
| O  | -2.873970682290 | 2.565376769033  | -1.765315257254 |
| Ge | -2.684690500664 | 5.449615625541  | -0.512160287095 |
| Ge | 1.050789849090  | 4.161328915687  | 1.357207963443  |
| Ge | -0.144568987127 | 7.474959638480  | 1.357180781650  |
| Ge | -0.294020782606 | -1.177660128864 | -0.512162692404 |
| Ge | -1.489398706490 | 2.135995778245  | -0.512124792469 |
| Ge | 2.246147475358  | 0.847667375812  | 1.357190986080  |
| TV | 3.611540919820  | -0.000000000000 | 0.000000000000  |
| TV | -3.586126192165 | 9.940939067513  | -0.000000000003 |
| TV | 1.493788056856  | 0.232088850461  | 3.725091799518  |

# EQ'-GeO<sub>2</sub> 65

|    |                 |                 |                 |
|----|-----------------|-----------------|-----------------|
| O  | 1.296779162933  | -1.915066719734 | 0.064064796896  |
| O  | -1.155526403514 | -2.635924385622 | -0.585079533816 |
| O  | 1.402194450686  | 0.078668548387  | 1.210578261886  |
| O  | -0.342928270270 | -0.493066717913 | -0.332767955362 |
| O  | 4.731819397721  | -1.915083989418 | 0.064108527354  |
| O  | 2.279519575048  | -2.635897942695 | -0.585071495053 |
| O  | 4.837138084865  | 0.078629036156  | 1.210524612363  |
| O  | 3.092022114661  | -0.493059942180 | -0.332792163052 |
| O  | 8.166819515699  | -1.915077145702 | 0.064099472393  |
| O  | 5.714519747611  | -2.635904850433 | -0.585051062791 |
| O  | 8.272195964678  | 0.078657198030  | 1.210561286235  |
| O  | 6.527053696993  | -0.493062570711 | -0.332729214538 |
| Ge | 7.996412516840  | -0.255510144678 | -1.334186807475 |
| Ge | 3.164225195799  | 0.904436857117  | 0.832870079069  |
| Ge | 6.599196759052  | 0.904412194108  | 0.832854793568  |
| Ge | 1.126453386005  | -0.255495697122 | -1.334194990818 |
| Ge | 4.561370502420  | -0.255490790212 | -1.334256400611 |
| Ge | -0.270825059355 | 0.904411793005  | 0.832828886482  |
| TV | 10.305016612416 | 0.000000000000  | 0.000000000000  |
| TV | -0.354836958988 | 4.040204880293  | 0.000000000000  |
| TV | -2.218113763605 | -1.226973370271 | 3.217403300084  |

# EQ'-GeO<sub>2</sub> 66

|    |                 |                 |                 |
|----|-----------------|-----------------|-----------------|
| O  | 0.551040109747  | 1.765612884709  | 2.130816383250  |
| O  | -2.258912582975 | -4.597435417623 | -4.219180056835 |
| O  | 3.297214843916  | 3.400708792556  | 3.584592757709  |
| O  | 0.512898595982  | -4.164467801959 | -0.242342727077 |
| O  | 3.269237464638  | 1.765596291924  | 2.130814616517  |
| O  | 0.459282515889  | -4.597449225654 | -4.219172750505 |
| O  | 6.015416676891  | 3.400725335525  | 3.584590036377  |
| O  | 3.231097961442  | -4.164479902242 | -0.242367415429 |
| O  | 5.987434844660  | 1.765640114632  | 2.130824310136  |
| O  | 3.177499813897  | -4.597441102636 | -4.219173991641 |
| O  | 8.733633426949  | 3.400746779623  | 3.584597509102  |
| O  | 5.949309659176  | -4.164462640097 | -0.242368728721 |
| Ge | 5.967266676105  | -1.471124617058 | -1.780580468324 |
| Ge | 4.615343945807  | -0.639084410042 | 0.968282931488  |
| Ge | 7.333541624211  | -0.639086808150 | 0.968297010248  |
| Ge | 0.530874826174  | -1.471114927557 | -1.780565360235 |
| Ge | 3.249066034078  | -1.471126212342 | -1.780585444289 |

|    |                |                 |                 |
|----|----------------|-----------------|-----------------|
| Ge | 1.897153557742 | -0.639072217821 | 0.968293535910  |
| TV | 8.154601220911 | -0.000000000018 | 0.000000000036  |
| TV | 0.018108539542 | 3.675097282497  | -0.000000000002 |
| TV | 1.386243250320 | 2.204913440502  | 4.582934773849  |

# EQ'-GeO<sub>2</sub> 67

|    |                 |                 |                 |
|----|-----------------|-----------------|-----------------|
| O  | 1.787427033867  | 1.657493770520  | -0.083039183348 |
| O  | 1.776180432773  | 3.819485332641  | -2.940529457854 |
| O  | 3.228948679238  | -0.589670097819 | 2.176013001033  |
| O  | -1.059034486061 | -3.880519343202 | -0.715017540773 |
| O  | 4.644018961288  | 1.656923559154  | -0.087792426900 |
| O  | 4.621883197163  | 3.816758876876  | -2.945802343577 |
| O  | 6.084834945267  | -0.593416664052 | 2.176668984162  |
| O  | 1.803148913158  | -3.884205659966 | -0.724835319073 |
| O  | 7.500123087758  | 1.657965237665  | -0.079623867178 |
| O  | 7.481301406424  | 3.816796421481  | -2.938643319093 |
| O  | 8.943475060935  | -0.590376746339 | 2.179654039073  |
| O  | 4.661881873545  | -3.885028560510 | -0.715873754265 |
| Ge | 3.229926294401  | -4.854378754162 | -0.038936769356 |
| Ge | 4.650751949154  | -1.855435767795 | 2.044294848256  |
| Ge | 7.511586740464  | -1.856379921735 | 2.050409555083  |
| Ge | -2.485766598545 | -4.855956291675 | -0.033463847557 |
| Ge | 0.372912997466  | -4.851711929599 | -0.042110890505 |
| Ge | 1.795787342957  | -1.845658542576 | 2.043400439804  |
| TV | 8.575376342539  | -0.000000000000 | -0.000000000003 |
| TV | 1.420617069436  | 3.929899471317  | -0.000000000002 |
| TV | 0.010055284019  | -2.920094621332 | 3.985223534811  |

# EQ'-GeO<sub>2</sub> 68

|    |                 |                 |                 |
|----|-----------------|-----------------|-----------------|
| O  | 1.597169345778  | -0.007034719649 | 0.429413343716  |
| O  | -0.333390715462 | -2.232180556095 | -1.628810904448 |
| O  | 2.579375042453  | 2.161228383787  | 2.501566430926  |
| O  | -3.497682015580 | -4.523999981285 | -0.506644099735 |
| O  | 1.610026449494  | 1.256034918441  | 2.961310798487  |
| O  | -0.320625207067 | -0.969050245401 | 0.903072898782  |
| O  | 2.592146776931  | 3.424343555783  | 5.033408595203  |
| O  | -3.484884970013 | -3.260849071513 | 2.025230764242  |
| O  | 1.622761362904  | 2.519190206808  | 5.493178023120  |
| O  | -0.307861175553 | 0.294072944526  | 3.434904144581  |
| O  | 2.605025614535  | 4.687500530115  | 7.565321031584  |
| O  | -3.472029368840 | -1.997746757303 | 4.557168740531  |
| Ge | 0.267242083147  | 1.845990313561  | 4.242526100263  |
| Ge | 3.940318498321  | 2.833743962771  | 3.750464363588  |
| Ge | 3.953020495067  | 4.096841089102  | 6.282375545906  |
| Ge | 0.241615048816  | -0.680168929578 | -0.821240443305 |
| Ge | 0.254408015765  | 0.582922915724  | 1.710641505246  |
| Ge | 3.927417818284  | 1.570621717565  | 1.218609438965  |
| TV | 5.583049531447  | 0.000000000000  | -0.000000000000 |
| TV | 1.195941203993  | 3.194095394172  | 0.000000000000  |
| TV | 0.038429557956  | 3.789386673692  | 7.595665352236  |

# EQ'-GeO<sub>2</sub> 69

|   |                 |                 |                 |
|---|-----------------|-----------------|-----------------|
| O | 1.246637012964  | -0.583991228364 | -0.189056249841 |
| O | -0.665151938372 | -1.321650693296 | -3.380419338120 |
| O | 3.625833863862  | -1.032420301700 | 4.798288091945  |
| O | -1.372283701934 | -1.473097810840 | -0.948065326331 |
| O | 0.822775417245  | 2.104348532365  | -0.189053189181 |

|    |                 |                 |                 |
|----|-----------------|-----------------|-----------------|
| O  | -1.088971278758 | 1.366697611565  | -3.380392099828 |
| O  | 3.201970948049  | 1.655923575433  | 4.798277444660  |
| O  | -1.796099279989 | 1.215231324000  | -0.948043378854 |
| O  | 0.398908731837  | 4.792731982288  | -0.189091837233 |
| O  | -1.512847378946 | 4.055005571001  | -3.380411230166 |
| O  | 2.778121474584  | 4.344286454291  | 4.798285143894  |
| O  | -2.219998837843 | 3.903575245045  | -0.948035930650 |
| Ge | -1.794725555147 | 5.351565940923  | -1.973260687132 |
| Ge | 1.727741978085  | 1.852608236338  | 2.113037081197  |
| Ge | 1.303889053509  | 4.540966529862  | 2.113032069695  |
| Ge | -0.947004855073 | -0.025117192763 | -1.973291993000 |
| Ge | -1.370870734113 | 2.663224153871  | -1.973255730935 |
| Ge | 2.151603710565  | -0.835727455587 | 2.113062139356  |
| TV | 4.612618573587  | -0.000000000005 | 0.000000000001  |
| TV | -1.271552518801 | 8.065042632100  | 0.000000000006  |
| TV | 1.049459844977  | -1.645863727858 | 3.710235501772  |

# EQ'-GeO<sub>2</sub> 70

|    |                 |                 |                 |
|----|-----------------|-----------------|-----------------|
| O  | -1.587106305753 | 0.105320012528  | -1.144690021994 |
| O  | 3.099590863695  | 0.717569678133  | -1.975662552858 |
| O  | -2.764702755728 | -1.129862761737 | 0.833621189341  |
| O  | 7.865747913421  | 8.362314071815  | 5.234681585677  |
| O  | -3.002296486798 | 1.152471573103  | 1.874007250577  |
| O  | -0.082413340616 | 2.428181162301  | 0.005334998958  |
| O  | -3.590047893453 | 3.050043698127  | -1.144700953225 |
| O  | 1.096627631875  | 3.662307120186  | -1.975658234334 |
| O  | -4.767644352753 | 1.814819556539  | 0.833610321039  |
| O  | 5.862803470962  | 11.307027268413 | 5.234691333276  |
| O  | -5.005238600503 | 4.097164736686  | 1.873992351978  |
| O  | -2.085356763912 | 5.372901668639  | 0.005306453437  |
| Ge | -3.658837507982 | 1.265872257309  | -0.571858382755 |
| Ge | -1.820915648453 | 1.907879833640  | 0.584178608220  |
| Ge | 0.151283956025  | 0.622547398552  | -1.725347950122 |
| Ge | -3.823853100434 | 4.852590266266  | 0.584171319658  |
| Ge | -1.655895050985 | -1.678851650229 | -0.571820880197 |
| Ge | -1.851657248230 | 3.567251421454  | -1.725359125400 |
| TV | 5.648291873391  | 0.000000000000  | 0.000000000000  |
| TV | -4.005900413083 | 5.889399267015  | -0.000000000000 |
| TV | -0.559607335978 | 4.963949455681  | 4.124651927402  |

# EQ'-GeO<sub>2</sub> 71

|    |                 |                 |                 |
|----|-----------------|-----------------|-----------------|
| O  | 1.191873954682  | 1.186428743449  | 0.421478464816  |
| O  | 1.055615235505  | 1.039162096444  | -3.128076598510 |
| O  | 1.989051838944  | 0.533051160000  | 2.923263368071  |
| O  | 0.004085997016  | -3.727601560042 | -1.347440304365 |
| O  | 4.479727617786  | 1.186476274992  | 0.421488480763  |
| O  | 4.343489799998  | 1.039160600087  | -3.128117881478 |
| O  | 5.276936131297  | 0.532997465562  | 2.923272348513  |
| O  | 3.292016415730  | -3.727614717155 | -1.347439448030 |
| O  | 7.767587755182  | 1.186445505210  | 0.421452107899  |
| O  | 7.631368544108  | 1.039142599093  | -3.128120098754 |
| O  | 8.564795867484  | 0.533071102902  | 2.923298270271  |
| O  | 6.579847233743  | -3.727616279791 | -1.347439089019 |
| Ge | 4.995661436507  | -3.585068402025 | -0.172657557054 |
| Ge | 4.803065571777  | -1.151740253066 | 1.745086444318  |
| Ge | 8.090880117003  | -1.151708685936 | 1.745022223692  |
| Ge | -1.579985728950 | -3.585084031983 | -0.172680578075 |

|    |                 |                 |                 |
|----|-----------------|-----------------|-----------------|
| Ge | 1.707848744228  | -3.585071419760 | -0.172679006160 |
| Ge | 1.515175063639  | -1.151745279062 | 1.745061001056  |
| TV | 9.863600702248  | -0.000000000000 | 0.000000000000  |
| TV | 0.737769694968  | 3.202985799715  | -0.000000000001 |
| TV | -0.814606955505 | -0.586055371645 | 4.284721824737  |

# EQ'-GeO<sub>2</sub> 72

|    |                 |                 |                 |
|----|-----------------|-----------------|-----------------|
| O  | 1.294537586047  | -0.641741877647 | -0.519727873693 |
| O  | 3.798555627465  | 3.150348982412  | -1.074879245337 |
| O  | -0.394241684830 | -0.928429202971 | 2.617201368254  |
| O  | 0.067503887502  | -2.622682461529 | -0.042641289250 |
| O  | 1.174679930710  | 3.104349590833  | -0.519730640108 |
| O  | 3.678697892257  | 6.896436273683  | -1.074894307763 |
| O  | -0.514063173806 | 2.817673011902  | 2.617192238706  |
| O  | -0.052340729181 | 1.123403521120  | -0.042640543562 |
| O  | 1.054849009667  | 6.850468278446  | -0.519725591909 |
| O  | 3.558848993340  | 10.642522774400 | -1.074894346534 |
| O  | -0.633907245992 | 6.563755014395  | 2.617208314208  |
| O  | -0.172172157311 | 4.869505311239  | -0.042636288299 |
| Ge | 2.105895991961  | 8.253791307899  | -1.371644770506 |
| Ge | -3.434269788789 | -1.830203027628 | 0.845069046049  |
| Ge | -3.554119632418 | 1.915904060707  | 0.845075443734  |
| Ge | 2.345603558741  | 0.761586863209  | -1.371637409198 |
| Ge | 2.225740564033  | 4.507679394299  | -1.371645873082 |
| Ge | -3.314414052280 | -5.576284531501 | 0.845067718354  |
| TV | 4.908955250355  | 0.000000000028  | 0.000000000019  |
| TV | -0.359539160481 | 11.238289849501 | -0.000000000123 |
| TV | -3.697573302631 | -3.777497593760 | 2.500913037704  |

# EQ'-GeO<sub>2</sub> 73

|    |                 |                 |                 |
|----|-----------------|-----------------|-----------------|
| O  | 0.882382365882  | -0.574068161974 | -0.046074626751 |
| O  | 0.067564954416  | -2.122925196345 | -3.231822566395 |
| O  | -0.365623588011 | 1.323878008338  | 2.854113914551  |
| O  | 1.699423723918  | -1.764643138521 | 1.915983134717  |
| O  | -0.828013232918 | 1.635388958861  | -0.046070279896 |
| O  | -1.642823513306 | 0.086517258775  | -3.231801643841 |
| O  | -2.075979095818 | 3.533297250527  | 2.854088357629  |
| O  | -0.010925937045 | 0.444847444274  | 1.916017127190  |
| O  | -2.538380494884 | 3.844834759328  | -0.046092182291 |
| O  | -3.353176154825 | 2.295969302700  | -3.231830047294 |
| O  | -3.786414984110 | 5.742707553927  | 2.854102144441  |
| O  | -1.721302422870 | 2.654279836518  | 1.915977078566  |
| Ge | -3.435389132200 | 2.836494368210  | -1.439018992576 |
| Ge | 0.924319243020  | 1.175775528586  | 0.388418953609  |
| Ge | -0.786035087309 | 3.385251515508  | 0.388393665213  |
| Ge | -0.014639161475 | -1.582368467892 | -1.439030198504 |
| Ge | -1.725027898739 | 0.627069392303  | -1.439004198669 |
| Ge | 2.634695025117  | -1.033660624116 | 0.388422508268  |
| TV | 4.555209439606  | 0.000000000000  | 0.000000000000  |
| TV | -5.131173897649 | 6.628344178501  | -0.000000000003 |
| TV | -0.517924007004 | 0.448641144285  | 4.549990931572  |

# EQ'-GeO<sub>2</sub> 74

|   |                 |                 |                 |
|---|-----------------|-----------------|-----------------|
| O | 1.527336969828  | -0.157326475329 | 0.812555856130  |
| O | -1.903937152306 | -1.368610060616 | -2.197527637209 |
| O | 2.804294996045  | 0.492740796063  | 2.564193315122  |
| O | -0.904791281388 | -2.992312951770 | -0.902785727991 |

|    |                 |                 |                 |
|----|-----------------|-----------------|-----------------|
| O  | 0.758828352875  | 3.237147857675  | 0.821265994611  |
| O  | -2.703263511046 | 2.036083586294  | -2.204894917498 |
| O  | 2.036028631778  | 3.884537282876  | 2.570706856653  |
| O  | -1.703978190880 | 0.414297519635  | -0.911856795902 |
| O  | -0.026774002337 | 6.633505244140  | 0.818919013357  |
| O  | -3.472738933365 | 5.429619784843  | -2.196563218033 |
| O  | 1.250679089095  | 7.287463739557  | 2.571484929327  |
| O  | -2.471999520286 | 3.805376045242  | -0.902277664563 |
| Ge | -1.509844021384 | 6.594869141315  | -0.379335115170 |
| Ge | 1.973515658874  | 1.589425736692  | 0.512752080151  |
| Ge | 1.204027686752  | 4.989804595143  | 0.519999370059  |
| Ge | 0.044531444390  | -0.205217623053 | -0.385985954469 |
| Ge | -0.726049422374 | 3.192194247151  | -0.373543477691 |
| Ge | 2.770030170453  | -1.812125341937 | 0.524498072642  |
| TV | 4.106555649757  | 0.000000000000  | -0.000000000000 |
| TV | -2.353526473413 | 10.198275889554 | -0.000000000003 |
| TV | 2.315251197184  | -1.056937952472 | 3.243586603045  |

# EQ'-GeO<sub>2</sub> 75

|    |                 |                 |                 |
|----|-----------------|-----------------|-----------------|
| O  | 0.086195267911  | 0.083256880179  | 0.021829560395  |
| O  | 1.399728119272  | 2.796151063355  | -1.784340851093 |
| O  | 0.112547903176  | 1.295323464603  | -0.713689305326 |
| O  | -1.190870845244 | 2.162067000554  | 1.090415150590  |
| O  | 2.679791485281  | 0.083215544773  | 0.021850843438  |
| O  | 3.993473054219  | 2.796140570129  | -1.784364027428 |
| O  | 2.706349353126  | 1.295245621844  | -0.713701064814 |
| O  | 1.402897315252  | 2.162080347173  | 1.090357557046  |
| O  | 5.273649522412  | 0.083276432587  | 0.021852228035  |
| O  | 6.587261529230  | 2.796100077499  | -1.784408634133 |
| O  | 5.300072637067  | 1.295271510263  | -0.713695346057 |
| O  | 3.996675388914  | 2.162086765877  | 1.090424311038  |
| Ge | 5.295574482455  | 0.996419689778  | 1.556452784624  |
| Ge | 1.404939784018  | 3.080760645850  | 2.835947574274  |
| Ge | 3.998746512572  | 3.080777890433  | 2.836010278040  |
| Ge | 0.108000615327  | 0.996379832875  | 1.556483642037  |
| Ge | 2.701771435797  | 0.996396727753  | 1.556457925335  |
| Ge | -1.188867123181 | 3.080747349403  | 2.835990261461  |
| TV | 7.781391277789  | -0.000000000000 | 0.000000000000  |
| TV | -2.586129457793 | 3.578230686708  | -0.000000000000 |
| TV | -1.290130261835 | -0.882780888327 | 5.086069211051  |
